# Supplementary material for: Methadone Distribution Trends from 2017-2019 in the United States
Source: bioRxiv or medRxiv preprint supplement (doi:10.1101/2020.11.07.20227496), 2020-11-10
Supplement: Supplementary file [file media-2.pdf]

DEPARTMENT OF JUSTICE DRUG ENFORCEMENT ADMINISTRATION

DEA DIVERSION CONTROL DIVISION

ARCOS DRUG RETAIL SUMMARY REPORTS

REPORT 01 by GRAMS - RETAIL DRUG DISTRIBUTION BY ZIP CODE WITHIN STATE

REPORT 02 by GRAMS - RETAIL DRUG DISTRIBUTION BY STATE WITHIN DRUG CODE

REPORT 03 by GRAMS - QUARTERLY DRUG DISTRIBUTION BY STATE PER 100K POPULATION

REPORT 04 by GRAMS - CUMULATIVE DISTRIBUTION BY STATE PER 100K POPULATION

REPORT 05 by GRAMS - STATISTICAL SUMMARY FOR RETAIL DRUG PURCHASES

REPORT 07 by GRAMS - UNITED STATES SUMMARY FOR RETAIL DRUG PURCHASES

DATE RANGE: 01/01/2018 TO 12/31/2018

**DISCLAIMER:** Automated Reports and Consolidated Ordering System (ARCOS) is a data collection system in which manufacturers and distributors report their controlled substances transactions to the Drug Enforcement Administration (DEA). ARCOS provides an acquisition/distribution transactional records of applicable activities to the DEA involving certain controlled substances, in accordance with Title 21, United States Code, Section 827(d)(1), and Title 21, Code of Federal Regulations, Section 1304.33. This information is collected and compiled by DEA in accordance with law for determining quota, distribution trends, internal audits, and other analyses.

Recipients should be aware, prior to use, analysis, studies, or publication of ARCOS data, the information contained in ARCOS generated reports are complete and accurate as to what was provided by DEA registrants to ARCOS in accordance with reporting requirements. This information is susceptible to future updates and corrections, without notice, as new information is obtained. DEA assumes no liability for analysis, conclusions or policy decisions of third parties based on internal interpretation of provided data.

**DRUG: 1100 - AMPHETAMINE****STATE: AK - ALASKA**

| REGISTRANT ZIP CODE 3      | 1ST QUARTER     | 2ND QUARTER     | 3RD QUARTER     | 4TH QUARTER     | TOTAL GRAMS      |
|----------------------------|-----------------|-----------------|-----------------|-----------------|------------------|
| 995                        | 4,948.11        | 5,100.40        | 4,978.97        | 5,300.81        | 20,328.28        |
| 996                        | 1,473.61        | 1,562.72        | 1,663.91        | 1,567.87        | 6,268.10         |
| 997                        | 1,174.32        | 1,197.90        | 1,168.31        | 1,115.16        | 4,655.68         |
| 998                        | 443.78          | 482.88          | 501.80          | 506.88          | 1,935.35         |
| 999                        | 160.43          | 169.52          | 205.60          | 177.73          | 713.29           |
| <b>AK - ALASKA - Total</b> | <b>8,200.25</b> | <b>8,513.41</b> | <b>8,518.59</b> | <b>8,668.44</b> | <b>33,900.69</b> |

**STATE: AL - ALABAMA**

| REGISTRANT ZIP CODE 3       | 1ST QUARTER       | 2ND QUARTER       | 3RD QUARTER       | 4TH QUARTER       | TOTAL GRAMS       |
|-----------------------------|-------------------|-------------------|-------------------|-------------------|-------------------|
| 350                         | 18,225.66         | 17,964.26         | 18,406.76         | 18,514.40         | 73,111.08         |
| 351                         | 9,178.60          | 9,208.29          | 9,456.49          | 9,401.98          | 37,245.35         |
| 352                         | 19,546.01         | 19,641.83         | 20,262.04         | 20,435.80         | 79,885.68         |
| 354                         | 8,135.87          | 8,026.41          | 8,170.46          | 8,315.88          | 32,648.62         |
| 355                         | 3,508.42          | 3,559.74          | 3,373.07          | 3,586.58          | 14,027.81         |
| 356                         | 10,340.95         | 10,035.29         | 10,590.13         | 10,324.00         | 41,290.38         |
| 357                         | 4,628.00          | 4,649.74          | 4,687.52          | 4,888.04          | 18,853.30         |
| 358                         | 5,860.07          | 5,891.52          | 6,276.07          | 5,952.49          | 23,980.15         |
| 359                         | 5,345.57          | 5,194.70          | 5,353.61          | 5,431.57          | 21,325.45         |
| 360                         | 6,843.05          | 6,624.82          | 6,757.18          | 6,788.32          | 27,013.36         |
| 361                         | 5,668.28          | 5,425.51          | 5,462.06          | 5,358.58          | 21,914.44         |
| 362                         | 2,352.69          | 2,435.97          | 2,449.60          | 2,444.72          | 9,682.98          |
| 363                         | 5,606.26          | 5,727.53          | 5,754.71          | 5,623.69          | 22,712.19         |
| 364                         | 1,281.84          | 1,307.61          | 1,281.14          | 1,260.40          | 5,130.99          |
| 365                         | 12,402.62         | 12,724.13         | 12,659.77         | 12,480.66         | 50,267.18         |
| 366                         | 8,164.74          | 7,971.68          | 8,133.59          | 8,136.99          | 32,406.99         |
| 367                         | 1,636.41          | 1,461.64          | 1,521.36          | 1,504.65          | 6,124.06          |
| 368                         | 6,619.67          | 6,545.43          | 6,596.24          | 6,645.50          | 26,406.84         |
| 369                         | 131.74            | 143.59            | 142.93            | 157.90            | 576.16            |
| <b>AL - ALABAMA - Total</b> | <b>135,476.45</b> | <b>134,539.67</b> | <b>137,334.74</b> | <b>137,252.15</b> | <b>544,603.01</b> |

**STATE: AR - ARKANSAS**

| REGISTRANT ZIP CODE 3 | 1ST QUARTER | 2ND QUARTER | 3RD QUARTER | 4TH QUARTER | TOTAL GRAMS |
|-----------------------|-------------|-------------|-------------|-------------|-------------|
| 716                   | 2,679.61    | 2,736.23    | 2,848.02    | 2,864.91    | 11,128.77   |
| 717                   | 964.59      | 915.68      | 948.19      | 997.76      | 3,826.21    |
| 718                   | 960.33      | 958.81      | 939.71      | 928.20      | 3,787.05    |
| 719                   | 3,502.38    | 3,456.54    | 3,476.52    | 3,397.64    | 13,833.09   |
| 720                   | 8,063.50    | 7,898.68    | 8,245.73    | 8,015.59    | 32,223.50   |
| 721                   | 6,311.82    | 6,261.09    | 6,376.39    | 6,232.49    | 25,181.79   |
| 722                   | 7,636.18    | 7,426.65    | 7,558.24    | 7,326.02    | 29,947.10   |
| 723                   | 1,559.50    | 1,453.38    | 1,590.51    | 1,517.63    | 6,121.02    |
| 724                   | 2,911.89    | 2,784.11    | 2,816.20    | 2,868.71    | 11,380.91   |
| 725                   | 763.51      | 766.06      | 736.63      | 705.63      | 2,971.83    |

|                              |                  |                  |                  |                  |                   |
|------------------------------|------------------|------------------|------------------|------------------|-------------------|
| 726                          | 1,487.26         | 1,579.51         | 1,536.36         | 1,550.74         | <b>6,153.87</b>   |
| 727                          | 12,489.45        | 12,257.38        | 12,758.54        | 13,099.68        | <b>50,605.06</b>  |
| 728                          | 993.53           | 994.00           | 1,040.81         | 1,079.97         | <b>4,108.31</b>   |
| 729                          | 2,001.07         | 1,992.35         | 2,056.07         | 1,954.64         | <b>8,004.13</b>   |
| <b>AR - ARKANSAS - Total</b> | <b>52,324.62</b> | <b>51,480.47</b> | <b>52,927.92</b> | <b>52,539.62</b> | <b>209,272.63</b> |

**STATE: AS - AMERICAN SAMOA**

| REGISTRANT ZIP CODE 3              | 1ST QUARTER | 2ND QUARTER | 3RD QUARTER | 4TH QUARTER | TOTAL GRAMS |
|------------------------------------|-------------|-------------|-------------|-------------|-------------|
| 967                                | 0           | 2.50        | 0           | 0           | <b>2.50</b> |
| <b>AS - AMERICAN SAMOA - Total</b> | <b>0.00</b> | <b>2.50</b> | <b>0.00</b> | <b>0.00</b> | <b>2.50</b> |

**STATE: AZ - ARIZONA**

| REGISTRANT ZIP CODE 3       | 1ST QUARTER      | 2ND QUARTER      | 3RD QUARTER       | 4TH QUARTER      | TOTAL GRAMS       |
|-----------------------------|------------------|------------------|-------------------|------------------|-------------------|
| 850                         | 17,901.11        | 18,481.09        | 18,786.04         | 19,387.57        | <b>74,555.80</b>  |
| 851                         | 3,573.59         | 3,428.61         | 3,525.47          | 3,774.98         | <b>14,302.64</b>  |
| 852                         | 37,099.25        | 44,040.68        | 51,473.94         | 39,506.43        | <b>172,120.30</b> |
| 853                         | 11,201.70        | 11,065.18        | 11,055.05         | 11,666.31        | <b>44,988.24</b>  |
| 855                         | 480.74           | 451.64           | 471.75            | 476.05           | <b>1,880.19</b>   |
| 856                         | 1,676.74         | 1,625.59         | 1,714.33          | 1,690.44         | <b>6,707.11</b>   |
| 857                         | 11,159.91        | 10,823.87        | 10,763.84         | 11,136.85        | <b>43,884.47</b>  |
| 859                         | 452.41           | 443.52           | 495.77            | 555.18           | <b>1,946.87</b>   |
| 860                         | 1,277.32         | 1,375.92         | 1,317.83          | 1,410.87         | <b>5,381.95</b>   |
| 863                         | 1,628.61         | 1,637.41         | 1,541.25          | 1,830.06         | <b>6,637.32</b>   |
| 864                         | 983.70           | 940.72           | 854.31            | 977.50           | <b>3,756.24</b>   |
| 865                         | 53.40            | 51.53            | 45.24             | 64.39            | <b>214.56</b>     |
| <b>AZ - ARIZONA - Total</b> | <b>87,488.48</b> | <b>94,365.76</b> | <b>102,044.82</b> | <b>92,476.65</b> | <b>376,375.70</b> |

**STATE: CA - CALIFORNIA**

| REGISTRANT ZIP CODE 3 | 1ST QUARTER | 2ND QUARTER | 3RD QUARTER | 4TH QUARTER | TOTAL GRAMS      |
|-----------------------|-------------|-------------|-------------|-------------|------------------|
| 900                   | 21,606.86   | 23,050.50   | 22,296.73   | 23,029.67   | <b>89,983.75</b> |
| 902                   | 12,791.67   | 13,168.10   | 13,166.51   | 13,307.87   | <b>52,434.15</b> |
| 903                   | 234.43      | 209.72      | 224.04      | 315.48      | <b>983.67</b>    |
| 904                   | 4,221.13    | 4,531.51    | 4,238.36    | 4,333.89    | <b>17,324.89</b> |
| 905                   | 1,790.05    | 1,962.83    | 1,777.60    | 1,867.62    | <b>7,398.11</b>  |
| 906                   | 2,397.55    | 2,463.31    | 2,452.12    | 2,532.10    | <b>9,845.09</b>  |
| 907                   | 3,501.80    | 3,535.94    | 3,720.70    | 3,503.36    | <b>14,261.80</b> |
| 908                   | 3,008.61    | 3,227.61    | 3,014.44    | 3,321.82    | <b>12,572.49</b> |
| 910                   | 1,549.76    | 1,660.33    | 1,571.52    | 1,602.71    | <b>6,384.31</b>  |
| 911                   | 2,752.77    | 2,731.66    | 2,760.78    | 2,799.54    | <b>11,044.75</b> |
| 912                   | 1,529.91    | 1,711.27    | 1,606.01    | 1,644.28    | <b>6,491.46</b>  |
| 913                   | 14,686.88   | 15,155.52   | 15,166.30   | 15,306.72   | <b>60,315.42</b> |
| 914                   | 4,458.93    | 4,834.46    | 4,747.38    | 4,960.26    | <b>19,001.03</b> |
| 915                   | 1,751.26    | 1,859.97    | 1,905.56    | 1,826.17    | <b>7,342.95</b>  |

ARCOS 3 - REPORT 01 by GRAMS  
RETAIL DRUG DISTRIBUTION BY ZIP CODE WITHIN STATE

|     |           |           |           |           |                   |
|-----|-----------|-----------|-----------|-----------|-------------------|
| 916 | 1,653.05  | 1,790.55  | 1,719.50  | 1,962.06  | <b>7,125.16</b>   |
| 917 | 6,968.00  | 7,111.28  | 6,949.71  | 7,196.22  | <b>28,225.21</b>  |
| 918 | 378.53    | 398.30    | 393.92    | 436.74    | <b>1,607.50</b>   |
| 919 | 2,747.27  | 2,796.06  | 2,714.30  | 2,910.58  | <b>11,168.21</b>  |
| 920 | 26,117.41 | 26,794.82 | 26,782.04 | 27,666.83 | <b>107,361.11</b> |
| 921 | 17,566.59 | 18,432.72 | 18,263.27 | 18,070.17 | <b>72,332.76</b>  |
| 922 | 3,754.97  | 3,576.44  | 3,196.86  | 3,522.46  | <b>14,050.73</b>  |
| 923 | 4,234.96  | 4,412.25  | 4,321.43  | 4,347.21  | <b>17,315.85</b>  |
| 924 | 319.88    | 328.50    | 268.25    | 302.91    | <b>1,219.55</b>   |
| 925 | 6,514.48  | 6,706.59  | 6,409.88  | 6,590.49  | <b>26,221.45</b>  |
| 926 | 21,080.30 | 22,452.04 | 21,963.50 | 21,951.81 | <b>87,447.65</b>  |
| 927 | 4,586.20  | 4,857.97  | 4,916.19  | 4,892.03  | <b>19,252.39</b>  |
| 928 | 7,932.98  | 8,419.30  | 8,354.65  | 8,349.14  | <b>33,056.07</b>  |
| 930 | 5,567.31  | 5,995.91  | 5,823.69  | 5,867.63  | <b>23,254.54</b>  |
| 931 | 3,366.60  | 3,463.72  | 3,116.67  | 3,386.04  | <b>13,333.03</b>  |
| 932 | 1,940.85  | 1,905.32  | 1,841.17  | 1,903.46  | <b>7,590.79</b>   |
| 933 | 1,887.45  | 1,906.65  | 1,910.68  | 1,868.41  | <b>7,573.18</b>   |
| 934 | 3,281.72  | 3,399.24  | 3,203.04  | 3,260.27  | <b>13,144.27</b>  |
| 935 | 2,273.66  | 2,326.88  | 2,135.41  | 2,162.52  | <b>8,898.46</b>   |
| 936 | 2,205.37  | 2,186.87  | 2,079.72  | 2,183.87  | <b>8,655.83</b>   |
| 937 | 3,395.91  | 3,462.46  | 3,413.21  | 3,628.63  | <b>13,900.21</b>  |
| 939 | 1,648.95  | 1,670.18  | 1,595.14  | 1,703.45  | <b>6,617.72</b>   |
| 940 | 5,776.44  | 6,128.43  | 6,156.70  | 6,345.99  | <b>24,407.56</b>  |
| 941 | 11,756.29 | 12,297.78 | 12,463.68 | 12,753.49 | <b>49,271.24</b>  |
| 943 | 1,019.10  | 1,106.67  | 1,043.96  | 1,077.77  | <b>4,247.50</b>   |
| 944 | 1,382.66  | 1,330.86  | 1,352.73  | 1,422.80  | <b>5,489.06</b>   |
| 945 | 16,564.13 | 16,095.17 | 16,614.63 | 17,331.54 | <b>66,605.47</b>  |
| 946 | 3,669.62  | 3,817.58  | 3,659.24  | 3,923.86  | <b>15,070.30</b>  |
| 947 | 1,478.11  | 1,427.02  | 1,445.43  | 1,540.93  | <b>5,891.49</b>   |
| 948 | 687.50    | 691.27    | 671.73    | 801.53    | <b>2,852.03</b>   |
| 949 | 5,076.76  | 4,888.19  | 4,840.39  | 4,986.73  | <b>19,792.07</b>  |
| 950 | 7,164.37  | 7,194.46  | 6,999.46  | 7,500.44  | <b>28,858.73</b>  |
| 951 | 3,897.99  | 3,951.50  | 4,078.19  | 4,125.51  | <b>16,053.19</b>  |
| 952 | 2,003.17  | 2,078.25  | 1,915.61  | 2,003.30  | <b>8,000.34</b>   |
| 953 | 4,988.07  | 4,941.06  | 4,664.05  | 5,085.80  | <b>19,678.97</b>  |
| 954 | 3,872.37  | 3,914.46  | 3,866.08  | 3,889.18  | <b>15,542.09</b>  |
| 955 | 907.83    | 872.51    | 961.20    | 933.26    | <b>3,674.80</b>   |
| 956 | 10,232.86 | 9,825.64  | 10,366.30 | 10,673.11 | <b>41,097.92</b>  |
| 957 | 2,380.76  | 2,474.96  | 2,453.58  | 2,579.16  | <b>9,888.47</b>   |
| 958 | 4,974.11  | 5,139.90  | 5,028.77  | 5,238.00  | <b>20,380.78</b>  |

|                                |                   |                   |                   |                   |                     |
|--------------------------------|-------------------|-------------------|-------------------|-------------------|---------------------|
| 959                            | 4,266.29          | 4,222.45          | 4,093.79          | 4,143.15          | 16,725.67           |
| 960                            | 1,796.54          | 1,799.05          | 1,906.94          | 1,884.75          | 7,387.29            |
| 961                            | 609.71            | 633.49            | 611.41            | 697.59            | 2,552.20            |
| <b>CA - CALIFORNIA - Total</b> | <b>300,208.74</b> | <b>309,327.49</b> | <b>305,214.17</b> | <b>313,452.33</b> | <b>1,228,202.73</b> |

**STATE: CO - COLORADO**

| REGISTRANT ZIP CODE 3        | 1ST QUARTER      | 2ND QUARTER      | 3RD QUARTER      | 4TH QUARTER      | TOTAL GRAMS       |
|------------------------------|------------------|------------------|------------------|------------------|-------------------|
| 800                          | 12,709.09        | 12,840.49        | 14,243.04        | 14,630.75        | 54,423.38         |
| 801                          | 15,227.03        | 15,507.35        | 15,764.69        | 16,219.30        | 62,718.37         |
| 802                          | 20,774.59        | 21,767.46        | 21,746.11        | 21,961.45        | 86,249.61         |
| 803                          | 3,548.00         | 3,538.72         | 3,358.82         | 3,813.66         | 14,259.19         |
| 804                          | 3,233.84         | 3,096.78         | 3,352.55         | 3,371.69         | 13,054.87         |
| 805                          | 8,132.50         | 8,254.13         | 8,430.92         | 8,818.43         | 33,635.98         |
| 806                          | 2,395.77         | 2,551.37         | 2,564.30         | 2,585.37         | 10,096.82         |
| 807                          | 352.68           | 390.70           | 409.20           | 383.47           | 1,536.04          |
| 808                          | 1,198.40         | 1,175.95         | 1,280.28         | 1,180.68         | 4,835.31          |
| 809                          | 7,784.19         | 8,061.64         | 8,078.07         | 8,093.68         | 32,017.58         |
| 810                          | 1,412.43         | 1,504.61         | 1,503.34         | 1,457.77         | 5,878.14          |
| 811                          | 269.79           | 247.58           | 324.83           | 311.78           | 1,153.99          |
| 812                          | 598.23           | 558.90           | 613.47           | 624.58           | 2,395.19          |
| 813                          | 698.89           | 681.89           | 726.91           | 709.17           | 2,816.87          |
| 814                          | 573.27           | 593.72           | 667.06           | 677.76           | 2,511.81          |
| 815                          | 1,764.52         | 1,753.62         | 1,827.96         | 1,833.23         | 7,179.33          |
| 816                          | 2,575.27         | 2,329.40         | 2,617.60         | 2,666.66         | 10,188.93         |
| <b>CO - COLORADO - Total</b> | <b>83,248.50</b> | <b>84,854.33</b> | <b>87,509.13</b> | <b>89,339.44</b> | <b>344,951.40</b> |

**STATE: CT - CONNECTICUT**

| REGISTRANT ZIP CODE 3           | 1ST QUARTER      | 2ND QUARTER      | 3RD QUARTER      | 4TH QUARTER      | TOTAL GRAMS       |
|---------------------------------|------------------|------------------|------------------|------------------|-------------------|
| 060                             | 9,499.66         | 9,379.45         | 9,655.00         | 9,581.20         | 38,115.31         |
| 061                             | 3,415.48         | 3,431.57         | 3,478.57         | 3,529.40         | 13,855.01         |
| 062                             | 2,453.03         | 2,401.36         | 2,455.85         | 2,697.51         | 10,007.76         |
| 063                             | 5,603.92         | 5,872.58         | 5,969.45         | 5,962.98         | 23,408.94         |
| 064                             | 13,093.00        | 13,150.21        | 13,339.72        | 13,582.32        | 53,165.25         |
| 065                             | 4,379.28         | 4,403.76         | 4,389.37         | 4,447.33         | 17,619.74         |
| 066                             | 1,543.73         | 1,616.71         | 1,785.29         | 1,852.06         | 6,797.79          |
| 067                             | 3,790.94         | 3,740.03         | 3,765.23         | 3,892.46         | 15,188.65         |
| 068                             | 9,872.64         | 9,976.99         | 10,586.54        | 10,591.59        | 41,027.76         |
| 069                             | 1,977.52         | 1,942.94         | 1,995.81         | 2,114.87         | 8,031.14          |
| <b>CT - CONNECTICUT - Total</b> | <b>55,629.20</b> | <b>55,915.61</b> | <b>57,420.84</b> | <b>58,251.72</b> | <b>227,217.37</b> |

**STATE: DC - DISTRICT OF COLUMBIA**

| REGISTRANT ZIP CODE 3 | 1ST QUARTER | 2ND QUARTER | 3RD QUARTER | 4TH QUARTER | TOTAL GRAMS |
|-----------------------|-------------|-------------|-------------|-------------|-------------|
| 200                   | 11,519.24   | 11,921.60   | 11,849.74   | 11,930.65   | 47,221.23   |

|                                    |                  |                  |                  |                  |                  |
|------------------------------------|------------------|------------------|------------------|------------------|------------------|
| 203                                | 100.26           | 92.01            | 148.27           | 86.65            | <b>427.20</b>    |
| 204                                | 471.35           | 427.40           | 465.56           | 513.42           | <b>1,877.72</b>  |
| 205                                | 0                | 0.63             | 1.88             | 0                | <b>2.50</b>      |
| <b>DC - DISTRICT OF COLUMBIA -</b> | <b>12,090.86</b> | <b>12,441.63</b> | <b>12,465.45</b> | <b>12,530.71</b> | <b>49,528.65</b> |

**STATE: DE - DELAWARE**

| REGISTRANT ZIP CODE 3        | 1ST QUARTER      | 2ND QUARTER      | 3RD QUARTER      | 4TH QUARTER      | TOTAL GRAMS      |
|------------------------------|------------------|------------------|------------------|------------------|------------------|
| 197                          | 8,861.19         | 8,955.25         | 8,727.19         | 9,194.61         | <b>35,738.23</b> |
| 198                          | 6,545.24         | 6,721.87         | 6,636.39         | 6,755.11         | <b>26,658.61</b> |
| 199                          | 5,678.63         | 5,584.34         | 5,815.38         | 5,592.05         | <b>22,670.41</b> |
| <b>DE - DELAWARE - Total</b> | <b>21,085.06</b> | <b>21,261.45</b> | <b>21,178.96</b> | <b>21,541.78</b> | <b>85,067.25</b> |

**STATE: FL - FLORIDA**

| REGISTRANT ZIP CODE 3       | 1ST QUARTER       | 2ND QUARTER       | 3RD QUARTER       | 4TH QUARTER       | TOTAL GRAMS         |
|-----------------------------|-------------------|-------------------|-------------------|-------------------|---------------------|
| 320                         | 9,966.58          | 10,078.31         | 10,173.49         | 10,245.91         | <b>40,464.29</b>    |
| 321                         | 7,889.16          | 8,292.18          | 7,928.44          | 8,354.63          | <b>32,464.42</b>    |
| 322                         | 23,160.02         | 23,847.99         | 23,514.09         | 23,368.58         | <b>93,890.68</b>    |
| 323                         | 9,900.64          | 9,888.69          | 9,541.59          | 9,650.44          | <b>38,981.36</b>    |
| 324                         | 8,767.12          | 8,766.69          | 8,490.48          | 7,239.32          | <b>33,263.61</b>    |
| 325                         | 19,391.26         | 19,454.99         | 20,172.83         | 18,745.07         | <b>77,764.15</b>    |
| 326                         | 6,175.93          | 6,034.24          | 6,034.83          | 6,292.93          | <b>24,537.92</b>    |
| 327                         | 18,709.57         | 18,862.59         | 18,996.06         | 19,391.44         | <b>75,959.66</b>    |
| 328                         | 14,083.89         | 13,892.67         | 13,883.33         | 14,147.02         | <b>56,006.91</b>    |
| 329                         | 13,562.89         | 13,876.50         | 14,071.82         | 13,915.00         | <b>55,426.20</b>    |
| 330                         | 15,150.83         | 15,526.42         | 15,264.96         | 15,344.23         | <b>61,286.44</b>    |
| 331                         | 18,145.19         | 18,636.84         | 18,192.93         | 18,842.05         | <b>73,817.01</b>    |
| 333                         | 13,139.48         | 13,459.76         | 12,928.76         | 13,359.77         | <b>52,887.78</b>    |
| 334                         | 25,471.27         | 26,139.65         | 26,066.66         | 26,164.46         | <b>103,842.04</b>   |
| 335                         | 11,691.68         | 11,855.17         | 11,618.42         | 12,242.41         | <b>47,407.67</b>    |
| 336                         | 15,680.06         | 15,951.86         | 15,849.78         | 16,358.52         | <b>63,840.22</b>    |
| 337                         | 14,764.30         | 15,140.32         | 14,929.15         | 15,497.24         | <b>60,331.00</b>    |
| 338                         | 7,589.46          | 7,356.55          | 7,444.58          | 7,652.60          | <b>30,043.20</b>    |
| 339                         | 13,510.54         | 14,025.38         | 13,666.81         | 14,192.08         | <b>55,394.80</b>    |
| 341                         | 7,781.39          | 7,582.74          | 7,574.12          | 7,741.98          | <b>30,680.23</b>    |
| 342                         | 14,556.83         | 14,586.66         | 14,246.42         | 14,484.27         | <b>57,874.17</b>    |
| 344                         | 4,310.23          | 4,236.26          | 4,118.70          | 4,231.06          | <b>16,896.26</b>    |
| 346                         | 9,891.93          | 9,679.42          | 9,865.72          | 10,188.22         | <b>39,625.29</b>    |
| 347                         | 8,642.98          | 8,705.04          | 8,561.01          | 8,950.60          | <b>34,859.63</b>    |
| 349                         | 7,085.93          | 7,441.65          | 7,495.28          | 7,334.40          | <b>29,357.26</b>    |
| <b>FL - FLORIDA - Total</b> | <b>319,019.15</b> | <b>323,318.57</b> | <b>320,630.26</b> | <b>323,934.22</b> | <b>1,286,902.21</b> |

**STATE: GA - GEORGIA**

| REGISTRANT ZIP CODE 3 | 1ST QUARTER | 2ND QUARTER | 3RD QUARTER | 4TH QUARTER | TOTAL GRAMS |
|-----------------------|-------------|-------------|-------------|-------------|-------------|
|-----------------------|-------------|-------------|-------------|-------------|-------------|

|                             |                   |                   |                   |                   |                   |
|-----------------------------|-------------------|-------------------|-------------------|-------------------|-------------------|
| 300                         | 39,818.27         | 39,372.77         | 40,611.48         | 40,811.60         | 160,614.11        |
| 301                         | 23,315.81         | 22,741.69         | 23,298.99         | 23,712.57         | 93,069.07         |
| 302                         | 14,299.33         | 14,193.66         | 14,875.82         | 15,188.87         | 58,557.68         |
| 303                         | 23,666.66         | 23,798.44         | 24,935.66         | 24,996.88         | 97,397.63         |
| 304                         | 7,088.84          | 6,689.99          | 6,879.12          | 6,884.58          | 27,542.52         |
| 305                         | 12,492.87         | 12,565.25         | 12,728.91         | 12,972.55         | 50,759.59         |
| 306                         | 8,753.25          | 8,188.48          | 8,545.18          | 8,661.07          | 34,147.98         |
| 307                         | 6,602.97          | 6,296.43          | 6,434.65          | 6,573.18          | 25,907.22         |
| 308                         | 3,704.89          | 3,531.61          | 3,656.05          | 3,765.02          | 14,657.56         |
| 309                         | 5,666.63          | 5,529.78          | 5,907.64          | 5,514.14          | 22,618.20         |
| 310                         | 7,845.45          | 7,433.82          | 7,468.79          | 7,684.39          | 30,432.45         |
| 312                         | 2,825.50          | 2,784.48          | 2,831.34          | 2,736.65          | 11,177.97         |
| 313                         | 6,037.64          | 5,785.25          | 6,163.96          | 5,986.89          | 23,973.74         |
| 314                         | 6,359.72          | 6,378.09          | 6,505.78          | 6,336.57          | 25,580.17         |
| 315                         | 8,606.90          | 8,169.92          | 8,469.97          | 8,284.55          | 33,531.33         |
| 316                         | 3,554.58          | 3,369.48          | 3,258.89          | 3,462.39          | 13,645.33         |
| 317                         | 6,864.69          | 6,691.24          | 6,866.13          | 6,922.36          | 27,344.41         |
| 318                         | 480.50            | 503.03            | 538.39            | 527.17            | 2,049.08          |
| 319                         | 6,845.49          | 6,704.97          | 6,849.47          | 6,568.03          | 26,967.95         |
| 398                         | 1,579.31          | 1,515.37          | 1,477.65          | 1,534.20          | 6,106.53          |
| <b>GA - GEORGIA - Total</b> | <b>196,409.28</b> | <b>192,243.75</b> | <b>198,303.85</b> | <b>199,123.65</b> | <b>786,080.52</b> |

**STATE: GU - GUAM**

| REGISTRANT ZIP CODE 3    | 1ST QUARTER   | 2ND QUARTER   | 3RD QUARTER   | 4TH QUARTER   | TOTAL GRAMS     |
|--------------------------|---------------|---------------|---------------|---------------|-----------------|
| 969                      | 371.55        | 474.05        | 488.00        | 425.77        | 1,759.37        |
| <b>GU - GUAM - Total</b> | <b>371.55</b> | <b>474.05</b> | <b>488.00</b> | <b>425.77</b> | <b>1,759.37</b> |

**STATE: HI - HAWAII**

| REGISTRANT ZIP CODE 3      | 1ST QUARTER      | 2ND QUARTER      | 3RD QUARTER      | 4TH QUARTER      | TOTAL GRAMS      |
|----------------------------|------------------|------------------|------------------|------------------|------------------|
| 967                        | 5,112.50         | 5,132.88         | 4,977.85         | 5,215.14         | 20,438.36        |
| 968                        | 5,006.63         | 5,185.66         | 5,698.82         | 4,903.88         | 20,795.00        |
| <b>HI - HAWAII - Total</b> | <b>10,119.13</b> | <b>10,318.54</b> | <b>10,676.67</b> | <b>10,119.02</b> | <b>41,233.36</b> |

**STATE: IA - IOWA**

| REGISTRANT ZIP CODE 3 | 1ST QUARTER | 2ND QUARTER | 3RD QUARTER | 4TH QUARTER | TOTAL GRAMS |
|-----------------------|-------------|-------------|-------------|-------------|-------------|
| 500                   | 4,221.10    | 4,176.96    | 4,139.85    | 4,431.86    | 16,969.77   |
| 501                   | 1,872.03    | 1,889.57    | 1,969.87    | 1,841.59    | 7,573.06    |
| 502                   | 2,992.76    | 3,114.00    | 3,253.32    | 3,274.28    | 12,634.36   |
| 503                   | 5,760.47    | 6,008.97    | 5,983.94    | 5,992.14    | 23,745.52   |
| 504                   | 839.44      | 847.35      | 901.39      | 902.45      | 3,490.62    |
| 505                   | 1,247.74    | 1,288.80    | 1,242.81    | 1,347.18    | 5,126.53    |
| 506                   | 1,619.99    | 1,652.26    | 1,604.52    | 1,704.21    | 6,580.99    |
| 507                   | 1,201.82    | 1,216.44    | 1,314.10    | 1,302.69    | 5,035.05    |

|                          |                  |                  |                  |                  |                   |
|--------------------------|------------------|------------------|------------------|------------------|-------------------|
| 508                      | 162.66           | 150.89           | 152.47           | 148.79           | 614.81            |
| 510                      | 1,039.88         | 1,018.41         | 1,042.99         | 1,085.00         | 4,186.28          |
| 511                      | 2,792.63         | 2,841.03         | 2,985.74         | 3,053.97         | 11,673.37         |
| 512                      | 463.83           | 457.87           | 503.99           | 504.02           | 1,929.70          |
| 513                      | 745.69           | 731.67           | 776.94           | 756.06           | 3,010.35          |
| 514                      | 371.71           | 388.85           | 401.05           | 386.35           | 1,547.96          |
| 515                      | 2,149.65         | 2,185.40         | 2,324.16         | 2,246.71         | 8,905.91          |
| 516                      | 211.49           | 207.47           | 224.92           | 197.69           | 841.57            |
| 520                      | 3,274.70         | 3,284.59         | 3,400.74         | 3,450.80         | 13,410.82         |
| 521                      | 510.07           | 482.27           | 466.16           | 553.58           | 2,012.08          |
| 522                      | 4,992.06         | 5,036.52         | 5,122.24         | 5,575.27         | 20,726.09         |
| 523                      | 2,546.88         | 2,521.30         | 2,583.62         | 2,580.22         | 10,232.02         |
| 524                      | 4,042.53         | 4,125.05         | 4,144.54         | 4,241.81         | 16,553.93         |
| 525                      | 1,029.73         | 989.89           | 1,013.85         | 967.93           | 4,001.41          |
| 526                      | 1,658.30         | 1,537.64         | 1,657.78         | 1,662.64         | 6,516.36          |
| 527                      | 3,206.12         | 3,158.29         | 3,207.79         | 3,274.01         | 12,846.20         |
| 528                      | 2,610.66         | 2,630.05         | 2,741.55         | 2,656.29         | 10,638.55         |
| <b>IA - IOWA - Total</b> | <b>51,563.94</b> | <b>51,941.54</b> | <b>53,160.32</b> | <b>54,137.53</b> | <b>210,803.33</b> |

**STATE: ID - IDAHO**

| REGISTRANT ZIP CODE 3     | 1ST QUARTER      | 2ND QUARTER      | 3RD QUARTER      | 4TH QUARTER      | TOTAL GRAMS       |
|---------------------------|------------------|------------------|------------------|------------------|-------------------|
| 832                       | 2,254.15         | 2,269.05         | 2,332.15         | 2,544.42         | 9,399.76          |
| 833                       | 2,028.26         | 2,056.59         | 2,050.62         | 2,146.31         | 8,281.78          |
| 834                       | 5,018.41         | 4,972.78         | 5,044.12         | 5,357.06         | 20,392.37         |
| 835                       | 388.05           | 499.68           | 453.65           | 449.47           | 1,790.84          |
| 836                       | 7,856.21         | 8,159.17         | 8,151.40         | 8,303.29         | 32,470.07         |
| 837                       | 7,477.87         | 7,769.64         | 7,832.30         | 8,187.13         | 31,266.94         |
| 838                       | 2,228.28         | 2,232.23         | 2,343.41         | 2,414.83         | 9,218.74          |
| <b>ID - IDAHO - Total</b> | <b>27,251.22</b> | <b>27,959.13</b> | <b>28,207.65</b> | <b>29,402.52</b> | <b>112,820.52</b> |

**STATE: IL - ILLINOIS**

| REGISTRANT ZIP CODE 3 | 1ST QUARTER | 2ND QUARTER | 3RD QUARTER | 4TH QUARTER | TOTAL GRAMS |
|-----------------------|-------------|-------------|-------------|-------------|-------------|
| 600                   | 33,517.21   | 34,061.71   | 34,670.26   | 34,889.72   | 137,138.90  |
| 601                   | 23,443.97   | 23,673.22   | 24,311.20   | 24,814.18   | 96,242.56   |
| 602                   | 1,506.53    | 1,536.39    | 1,499.78    | 1,517.74    | 6,060.44    |
| 603                   | 1,356.45    | 1,336.32    | 1,381.23    | 1,448.29    | 5,522.29    |
| 604                   | 19,033.52   | 19,164.88   | 19,699.77   | 20,121.25   | 78,019.42   |
| 605                   | 18,055.95   | 18,148.10   | 18,612.88   | 19,025.45   | 73,842.38   |
| 606                   | 38,567.22   | 39,771.95   | 39,828.97   | 40,752.48   | 158,920.62  |
| 607                   | 2,218.83    | 2,306.38    | 2,447.41    | 2,440.93    | 9,413.55    |
| 608                   | 710.83      | 692.71      | 767.15      | 741.39      | 2,912.08    |
| 609                   | 2,161.30    | 2,029.48    | 2,030.84    | 2,183.87    | 8,405.49    |



|                              |                   |                   |                   |                   |                   |
|------------------------------|-------------------|-------------------|-------------------|-------------------|-------------------|
| 610                          | 3,426.46          | 3,410.79          | 3,593.16          | 3,714.08          | 14,144.50         |
| 611                          | 4,009.81          | 4,049.59          | 4,268.07          | 4,086.44          | 16,413.91         |
| 612                          | 3,136.17          | 3,140.87          | 3,090.59          | 3,188.31          | 12,555.94         |
| 613                          | 2,493.91          | 2,504.78          | 2,535.28          | 2,782.84          | 10,316.81         |
| 614                          | 1,986.08          | 1,904.98          | 1,938.96          | 1,961.26          | 7,791.27          |
| 615                          | 3,334.28          | 3,190.59          | 3,278.61          | 3,438.64          | 13,242.11         |
| 616                          | 4,253.61          | 4,106.54          | 4,301.04          | 4,382.28          | 17,043.46         |
| 617                          | 3,847.50          | 3,532.65          | 3,799.60          | 3,869.53          | 15,049.28         |
| 618                          | 3,980.04          | 3,722.83          | 3,720.25          | 4,081.25          | 15,504.37         |
| 619                          | 1,262.55          | 1,125.82          | 1,080.57          | 1,164.98          | 4,633.92          |
| 620                          | 3,795.51          | 3,769.17          | 3,744.47          | 3,750.20          | 15,059.35         |
| 622                          | 5,499.31          | 5,725.97          | 5,695.78          | 5,660.98          | 22,582.04         |
| 623                          | 1,923.10          | 1,962.63          | 1,886.10          | 1,968.51          | 7,740.33          |
| 624                          | 1,214.04          | 1,074.36          | 1,182.30          | 1,154.79          | 4,625.49          |
| 625                          | 1,642.82          | 1,581.14          | 1,558.72          | 1,628.32          | 6,411.00          |
| 626                          | 1,617.17          | 1,529.99          | 1,537.90          | 1,617.20          | 6,302.27          |
| 627                          | 2,408.10          | 2,363.80          | 2,376.89          | 2,450.59          | 9,599.38          |
| 628                          | 2,464.19          | 2,410.05          | 2,482.35          | 2,428.57          | 9,785.15          |
| 629                          | 3,945.88          | 3,515.70          | 3,722.01          | 3,664.51          | 14,848.09         |
| <b>IL - ILLINOIS - Total</b> | <b>196,812.32</b> | <b>197,343.37</b> | <b>201,042.12</b> | <b>204,928.58</b> | <b>800,126.39</b> |

## STATE: IN - INDIANA

| REGISTRANT ZIP CODE 3 | 1ST QUARTER | 2ND QUARTER | 3RD QUARTER | 4TH QUARTER | TOTAL GRAMS |
|-----------------------|-------------|-------------|-------------|-------------|-------------|
| 460                   | 15,666.20   | 16,047.57   | 16,167.36   | 16,207.30   | 64,088.43   |
| 461                   | 9,179.26    | 9,206.05    | 9,772.16    | 10,152.71   | 38,310.18   |
| 462                   | 16,506.54   | 17,080.95   | 16,880.59   | 16,998.54   | 67,466.62   |
| 463                   | 12,478.58   | 12,448.37   | 12,859.72   | 13,042.82   | 50,829.49   |
| 464                   | 1,217.05    | 1,203.03    | 1,279.76    | 1,296.58    | 4,996.41    |
| 465                   | 17,814.32   | 17,558.38   | 17,938.10   | 17,806.52   | 71,117.32   |
| 466                   | 4,936.11    | 4,747.49    | 4,688.38    | 4,788.30    | 19,160.27   |
| 467                   | 3,592.13    | 3,412.48    | 3,699.08    | 3,804.17    | 14,507.86   |
| 468                   | 6,015.18    | 6,128.25    | 6,241.09    | 6,438.23    | 24,822.76   |
| 469                   | 5,673.68    | 5,503.17    | 5,669.20    | 5,720.12    | 22,566.17   |
| 470                   | 1,663.69    | 1,633.38    | 1,760.84    | 1,765.39    | 6,823.29    |
| 471                   | 7,780.35    | 7,874.28    | 7,221.08    | 6,682.97    | 29,558.68   |
| 472                   | 2,357.84    | 2,364.25    | 2,448.86    | 2,518.65    | 9,689.60    |
| 473                   | 5,261.09    | 5,022.60    | 5,194.33    | 5,255.84    | 20,733.86   |
| 474                   | 3,998.19    | 3,898.90    | 4,090.20    | 4,151.25    | 16,138.55   |
| 475                   | 2,332.01    | 2,270.12    | 2,460.14    | 2,539.14    | 9,601.41    |
| 476                   | 2,802.09    | 2,792.09    | 2,905.31    | 3,010.72    | 11,510.21   |
| 477                   | 6,018.74    | 6,006.68    | 6,087.02    | 6,243.45    | 24,355.90   |

|                             |                   |                   |                   |                   |                   |
|-----------------------------|-------------------|-------------------|-------------------|-------------------|-------------------|
| 478                         | 2,386.83          | 2,267.89          | 2,276.63          | 2,351.54          | 9,282.89          |
| 479                         | 7,225.71          | 7,200.80          | 7,417.47          | 7,372.81          | 29,216.79         |
| <b>IN - INDIANA - Total</b> | <b>134,905.57</b> | <b>134,666.73</b> | <b>137,057.34</b> | <b>138,147.04</b> | <b>544,776.67</b> |

**STATE: KS - KANSAS**

| REGISTRANT ZIP CODE 3      | 1ST QUARTER      | 2ND QUARTER      | 3RD QUARTER      | 4TH QUARTER      | TOTAL GRAMS       |
|----------------------------|------------------|------------------|------------------|------------------|-------------------|
| 660                        | 15,047.94        | 14,981.44        | 15,207.27        | 15,468.41        | 60,705.06         |
| 661                        | 1,949.41         | 1,936.04         | 1,929.50         | 2,013.89         | 7,828.84          |
| 662                        | 19,018.94        | 19,448.39        | 19,979.27        | 19,760.73        | 78,207.33         |
| 664                        | 826.71           | 990.71           | 1,021.78         | 789.88           | 3,629.08          |
| 665                        | 1,491.33         | 1,558.25         | 1,512.46         | 1,647.48         | 6,209.52          |
| 666                        | 5,004.46         | 5,143.78         | 5,129.12         | 5,241.44         | 20,518.80         |
| 667                        | 1,705.89         | 1,688.02         | 1,779.33         | 1,748.56         | 6,921.81          |
| 668                        | 603.10           | 624.29           | 607.11           | 638.04           | 2,472.55          |
| 669                        | 117.06           | 104.38           | 74.03            | 114.42           | 409.89            |
| 670                        | 2,620.14         | 2,659.28         | 2,602.52         | 2,639.31         | 10,521.24         |
| 671                        | 1,031.69         | 942.08           | 989.04           | 1,037.51         | 4,000.32          |
| 672                        | 7,872.45         | 7,927.99         | 7,975.21         | 8,128.50         | 31,904.15         |
| 673                        | 838.94           | 804.02           | 795.15           | 775.21           | 3,213.32          |
| 674                        | 1,358.08         | 1,264.64         | 1,338.16         | 1,323.36         | 5,284.24          |
| 675                        | 1,157.33         | 1,144.44         | 1,169.39         | 1,187.45         | 4,658.61          |
| 676                        | 745.98           | 739.58           | 746.90           | 782.51           | 3,014.97          |
| 677                        | 346.62           | 383.80           | 346.38           | 369.05           | 1,445.85          |
| 678                        | 679.50           | 663.58           | 662.30           | 718.64           | 2,724.03          |
| 679                        | 173.81           | 207.41           | 250.32           | 249.96           | 881.49            |
| <b>KS - KANSAS - Total</b> | <b>62,589.40</b> | <b>63,212.10</b> | <b>64,115.24</b> | <b>64,634.36</b> | <b>254,551.10</b> |

**STATE: KY - KENTUCKY**

| REGISTRANT ZIP CODE 3 | 1ST QUARTER | 2ND QUARTER | 3RD QUARTER | 4TH QUARTER | TOTAL GRAMS |
|-----------------------|-------------|-------------|-------------|-------------|-------------|
| 400                   | 4,163.47    | 3,942.54    | 3,977.27    | 4,148.11    | 16,231.40   |
| 401                   | 1,879.73    | 1,599.68    | 2,073.30    | 1,354.62    | 6,907.32    |
| 402                   | 16,982.26   | 16,794.58   | 17,053.56   | 17,233.90   | 68,064.29   |
| 403                   | 4,344.76    | 4,228.94    | 4,223.56    | 4,378.51    | 17,175.76   |
| 404                   | 1,839.39    | 1,862.56    | 1,804.24    | 1,843.29    | 7,349.49    |
| 405                   | 7,473.50    | 7,351.09    | 7,267.90    | 7,652.41    | 29,744.90   |
| 406                   | 762.12      | 742.31      | 799.91      | 771.86      | 3,076.21    |
| 407                   | 610.14      | 576.77      | 583.06      | 628.01      | 2,397.98    |
| 408                   | 173.00      | 169.35      | 182.21      | 168.77      | 693.34      |
| 409                   | 201.26      | 195.73      | 215.71      | 190.82      | 803.51      |
| 410                   | 10,231.82   | 9,958.01    | 10,032.01   | 10,482.04   | 40,703.87   |
| 411                   | 1,415.63    | 1,415.90    | 1,327.32    | 1,414.79    | 5,573.64    |
| 412                   | 358.83      | 339.61      | 361.34      | 361.36      | 1,421.14    |

|                              |                  |                  |                  |                  |                   |
|------------------------------|------------------|------------------|------------------|------------------|-------------------|
| 413                          | 117.47           | 133.18           | 150.12           | 144.37           | 545.15            |
| 414                          | 137.25           | 136.57           | 127.61           | 133.71           | 535.14            |
| 415                          | 580.27           | 509.14           | 579.27           | 608.78           | 2,277.46          |
| 416                          | 348.16           | 357.03           | 367.35           | 351.06           | 1,423.61          |
| 417                          | 344.21           | 308.93           | 335.64           | 382.80           | 1,371.58          |
| 418                          | 100.49           | 97.85            | 88.94            | 106.35           | 393.63            |
| 420                          | 4,592.93         | 4,639.80         | 4,663.97         | 4,628.52         | 18,525.21         |
| 421                          | 2,984.40         | 3,110.49         | 3,048.01         | 3,054.48         | 12,197.38         |
| 422                          | 2,373.05         | 2,096.23         | 2,175.50         | 2,105.33         | 8,750.10          |
| 423                          | 3,523.82         | 3,502.09         | 3,476.52         | 3,544.82         | 14,047.26         |
| 424                          | 3,516.42         | 3,417.05         | 3,438.64         | 3,578.44         | 13,950.55         |
| 425                          | 445.01           | 389.08           | 406.71           | 396.75           | 1,637.56          |
| 426                          | 206.07           | 212.47           | 222.94           | 214.89           | 856.36            |
| 427                          | 2,491.31         | 2,422.47         | 2,507.14         | 2,433.10         | 9,854.03          |
| <b>KY - KENTUCKY - Total</b> | <b>72,196.77</b> | <b>70,509.45</b> | <b>71,489.75</b> | <b>72,311.88</b> | <b>286,507.85</b> |

**STATE: LA - LOUISIANA**

| REGISTRANT ZIP CODE 3         | 1ST QUARTER       | 2ND QUARTER       | 3RD QUARTER       | 4TH QUARTER       | TOTAL GRAMS       |
|-------------------------------|-------------------|-------------------|-------------------|-------------------|-------------------|
| 700                           | 19,992.53         | 19,911.21         | 19,753.51         | 20,511.11         | 80,168.35         |
| 701                           | 10,432.79         | 10,431.94         | 10,468.96         | 11,010.88         | 42,344.57         |
| 703                           | 6,201.60          | 6,156.73          | 6,382.06          | 6,343.44          | 25,083.82         |
| 704                           | 19,762.00         | 19,992.32         | 20,967.19         | 20,921.97         | 81,643.47         |
| 705                           | 32,877.52         | 33,189.24         | 35,535.10         | 34,964.63         | 136,566.49        |
| 706                           | 12,063.98         | 12,046.29         | 12,710.46         | 12,776.24         | 49,596.97         |
| 707                           | 20,238.10         | 20,033.83         | 21,039.30         | 20,862.16         | 82,173.39         |
| 708                           | 16,108.83         | 16,027.83         | 16,662.10         | 16,666.25         | 65,465.01         |
| 710                           | 2,082.01          | 2,031.24          | 2,063.50          | 2,134.75          | 8,311.51          |
| 711                           | 7,429.89          | 7,473.16          | 7,882.44          | 7,873.56          | 30,659.05         |
| 712                           | 6,985.72          | 6,739.95          | 7,160.15          | 7,122.87          | 28,008.69         |
| 713                           | 5,851.45          | 5,654.05          | 5,958.59          | 6,054.88          | 23,518.96         |
| 714                           | 2,087.12          | 2,002.74          | 2,217.58          | 2,118.30          | 8,425.73          |
| <b>LA - LOUISIANA - Total</b> | <b>162,113.52</b> | <b>161,690.52</b> | <b>168,800.94</b> | <b>169,361.04</b> | <b>661,966.01</b> |

**STATE: MA - MASSACHUSETTS**

| REGISTRANT ZIP CODE 3 | 1ST QUARTER | 2ND QUARTER | 3RD QUARTER | 4TH QUARTER | TOTAL GRAMS |
|-----------------------|-------------|-------------|-------------|-------------|-------------|
| 010                   | 9,042.33    | 8,896.92    | 8,579.91    | 9,278.78    | 35,797.95   |
| 011                   | 2,195.81    | 2,287.04    | 2,241.46    | 2,487.13    | 9,211.44    |
| 012                   | 2,281.88    | 2,396.82    | 2,351.22    | 2,442.06    | 9,471.98    |
| 013                   | 2,596.98    | 2,639.84    | 2,625.13    | 2,649.10    | 10,511.05   |
| 014                   | 5,251.74    | 5,322.20    | 5,349.09    | 5,637.25    | 21,560.28   |
| 015                   | 7,445.40    | 7,549.87    | 7,703.27    | 7,918.54    | 30,617.08   |
| 016                   | 5,703.39    | 5,652.15    | 5,645.64    | 5,779.22    | 22,780.40   |

|                                   |                   |                   |                   |                   |                   |
|-----------------------------------|-------------------|-------------------|-------------------|-------------------|-------------------|
| 017                               | 11,794.57         | 11,466.14         | 11,766.43         | 11,776.26         | 46,803.40         |
| 018                               | 20,462.05         | 20,284.98         | 20,631.16         | 20,927.27         | 82,305.46         |
| 019                               | 17,773.82         | 17,770.23         | 18,033.36         | 18,017.71         | 71,595.13         |
| 020                               | 13,940.32         | 13,916.36         | 14,206.86         | 14,467.55         | 56,531.08         |
| 021                               | 34,662.59         | 34,569.47         | 34,661.87         | 35,415.56         | 139,309.49        |
| 022                               | 1,579.88          | 1,560.80          | 1,537.59          | 1,701.15          | 6,379.43          |
| 023                               | 13,582.65         | 13,820.41         | 13,841.84         | 14,119.96         | 55,364.86         |
| 024                               | 10,993.80         | 10,897.60         | 11,295.09         | 11,275.92         | 44,462.41         |
| 025                               | 3,934.22          | 4,277.32          | 4,455.33          | 4,332.61          | 16,999.48         |
| 026                               | 4,968.70          | 5,098.29          | 5,663.52          | 5,152.29          | 20,882.81         |
| 027                               | 12,572.76         | 12,771.97         | 12,958.06         | 13,240.63         | 51,543.42         |
| <b>MA - MASSACHUSETTS - Total</b> | <b>180,782.88</b> | <b>181,178.42</b> | <b>183,546.84</b> | <b>186,618.99</b> | <b>732,127.12</b> |

**STATE: MD - MARYLAND**

| REGISTRANT ZIP CODE 3        | 1ST QUARTER      | 2ND QUARTER      | 3RD QUARTER      | 4TH QUARTER      | TOTAL GRAMS       |
|------------------------------|------------------|------------------|------------------|------------------|-------------------|
| 206                          | 4,466.68         | 4,576.48         | 4,713.08         | 4,997.37         | 18,753.60         |
| 207                          | 6,133.30         | 6,438.76         | 6,233.88         | 5,926.76         | 24,732.71         |
| 208                          | 14,570.10        | 14,712.57        | 14,870.12        | 14,880.17        | 59,032.96         |
| 209                          | 2,839.40         | 2,749.42         | 2,742.81         | 2,751.12         | 11,082.74         |
| 210                          | 17,728.95        | 18,528.44        | 18,044.63        | 18,658.55        | 72,960.57         |
| 211                          | 8,005.08         | 8,246.40         | 8,126.76         | 8,511.83         | 32,890.06         |
| 212                          | 16,897.60        | 17,570.00        | 17,028.27        | 17,820.35        | 69,316.23         |
| 214                          | 2,851.14         | 2,888.80         | 2,926.58         | 2,944.22         | 11,610.74         |
| 215                          | 1,973.43         | 1,934.58         | 1,870.64         | 2,010.20         | 7,788.85          |
| 216                          | 3,308.46         | 3,258.28         | 3,241.59         | 3,293.71         | 13,102.03         |
| 217                          | 10,933.89        | 11,162.67        | 10,993.73        | 11,213.31        | 44,303.60         |
| 218                          | 2,077.58         | 2,169.33         | 2,215.45         | 2,143.21         | 8,605.57          |
| 219                          | 2,794.90         | 2,766.25         | 2,856.80         | 2,894.26         | 11,312.22         |
| <b>MD - MARYLAND - Total</b> | <b>94,580.51</b> | <b>97,001.98</b> | <b>95,864.34</b> | <b>98,045.05</b> | <b>385,491.88</b> |

**STATE: ME - MAINE**

| REGISTRANT ZIP CODE 3 | 1ST QUARTER | 2ND QUARTER | 3RD QUARTER | 4TH QUARTER | TOTAL GRAMS |
|-----------------------|-------------|-------------|-------------|-------------|-------------|
| 039                   | 913.24      | 982.46      | 972.14      | 994.75      | 3,862.60    |
| 040                   | 8,217.43    | 8,234.05    | 8,834.36    | 8,627.82    | 33,913.66   |
| 041                   | 4,031.40    | 4,049.99    | 4,240.38    | 4,127.38    | 16,449.15   |
| 042                   | 2,067.48    | 2,005.56    | 2,169.44    | 2,280.49    | 8,522.97    |
| 043                   | 1,510.69    | 1,591.46    | 1,690.32    | 1,650.88    | 6,443.35    |
| 044                   | 2,203.33    | 2,097.82    | 2,161.95    | 2,228.24    | 8,691.33    |
| 045                   | 804.58      | 790.07      | 865.89      | 781.08      | 3,241.62    |
| 046                   | 716.67      | 736.79      | 791.70      | 779.27      | 3,024.44    |
| 047                   | 493.16      | 453.61      | 494.20      | 508.83      | 1,949.80    |
| 048                   | 542.91      | 619.06      | 707.51      | 619.98      | 2,489.46    |

|                           |                  |                  |                  |                  |                  |
|---------------------------|------------------|------------------|------------------|------------------|------------------|
| 049                       | 1,991.15         | 1,968.93         | 1,954.09         | 1,904.75         | <b>7,818.92</b>  |
| <b>ME - MAINE - Total</b> | <b>23,492.06</b> | <b>23,529.79</b> | <b>24,881.99</b> | <b>24,503.48</b> | <b>96,407.31</b> |

**STATE: MI - MICHIGAN**

| REGISTRANT ZIP CODE 3        | 1ST QUARTER       | 2ND QUARTER       | 3RD QUARTER       | 4TH QUARTER       | TOTAL GRAMS       |
|------------------------------|-------------------|-------------------|-------------------|-------------------|-------------------|
| 480                          | 39,577.93         | 39,573.13         | 39,388.64         | 39,655.13         | <b>158,194.83</b> |
| 481                          | 41,234.36         | 41,261.68         | 41,677.74         | 42,121.83         | <b>166,295.61</b> |
| 482                          | 6,748.60          | 6,690.46          | 6,263.44          | 6,523.13          | <b>26,225.62</b>  |
| 483                          | 32,990.01         | 33,747.10         | 33,056.71         | 33,712.70         | <b>133,506.53</b> |
| 484                          | 8,879.82          | 8,521.88          | 8,735.51          | 8,698.01          | <b>34,835.22</b>  |
| 485                          | 2,889.71          | 2,869.79          | 2,814.33          | 2,891.80          | <b>11,465.63</b>  |
| 486                          | 5,026.81          | 5,019.86          | 5,092.97          | 5,028.83          | <b>20,168.47</b>  |
| 487                          | 2,901.86          | 2,937.06          | 2,887.12          | 2,994.85          | <b>11,720.89</b>  |
| 488                          | 15,529.69         | 15,048.62         | 14,595.38         | 15,632.96         | <b>60,806.64</b>  |
| 489                          | 4,415.07          | 4,361.44          | 4,307.54          | 4,450.91          | <b>17,534.96</b>  |
| 490                          | 17,737.42         | 17,509.42         | 17,440.17         | 17,771.02         | <b>70,458.04</b>  |
| 491                          | 2,233.52          | 2,224.13          | 2,299.58          | 2,311.48          | <b>9,068.70</b>   |
| 492                          | 4,148.01          | 4,048.81          | 4,017.86          | 4,173.73          | <b>16,388.42</b>  |
| 493                          | 7,071.47          | 7,196.81          | 7,121.63          | 7,385.56          | <b>28,775.47</b>  |
| 494                          | 19,500.42         | 19,420.13         | 19,638.32         | 19,753.75         | <b>78,312.62</b>  |
| 495                          | 19,560.14         | 19,317.35         | 19,472.39         | 19,657.87         | <b>78,007.75</b>  |
| 496                          | 5,791.76          | 5,711.07          | 5,806.79          | 5,751.12          | <b>23,060.75</b>  |
| 497                          | 3,512.59          | 3,545.87          | 3,636.09          | 3,480.73          | <b>14,175.27</b>  |
| 498                          | 3,503.66          | 3,213.23          | 3,471.07          | 3,365.44          | <b>13,553.40</b>  |
| 499                          | 1,604.79          | 1,472.10          | 1,593.62          | 1,602.16          | <b>6,272.67</b>   |
| <b>MI - MICHIGAN - Total</b> | <b>244,857.64</b> | <b>243,689.95</b> | <b>243,316.89</b> | <b>246,963.00</b> | <b>978,827.49</b> |

**STATE: MN - MINNESOTA**

| REGISTRANT ZIP CODE 3 | 1ST QUARTER | 2ND QUARTER | 3RD QUARTER | 4TH QUARTER | TOTAL GRAMS       |
|-----------------------|-------------|-------------|-------------|-------------|-------------------|
| 550                   | 12,845.37   | 12,800.42   | 12,665.47   | 13,409.02   | <b>51,720.28</b>  |
| 551                   | 17,709.84   | 18,027.72   | 17,808.72   | 18,396.21   | <b>71,942.48</b>  |
| 553                   | 22,878.90   | 22,958.84   | 23,301.34   | 24,099.77   | <b>93,238.85</b>  |
| 554                   | 26,311.76   | 26,852.70   | 26,618.06   | 27,888.10   | <b>107,670.62</b> |
| 556                   | 138.50      | 109.20      | 124.83      | 131.63      | <b>504.16</b>     |
| 557                   | 3,186.47    | 3,273.16    | 3,191.78    | 3,355.60    | <b>13,007.01</b>  |
| 558                   | 2,116.78    | 2,062.44    | 2,039.98    | 2,120.95    | <b>8,340.16</b>   |
| 559                   | 5,383.01    | 5,199.52    | 5,194.57    | 5,445.73    | <b>21,222.84</b>  |
| 560                   | 5,410.85    | 5,392.89    | 5,301.11    | 5,484.05    | <b>21,588.90</b>  |
| 561                   | 826.10      | 873.27      | 878.84      | 881.17      | <b>3,459.38</b>   |
| 562                   | 1,723.74    | 1,700.63    | 1,594.73    | 1,799.22    | <b>6,818.33</b>   |
| 563                   | 4,444.02    | 4,266.93    | 4,365.91    | 4,565.13    | <b>17,641.98</b>  |
| 564                   | 2,261.61    | 2,345.41    | 2,511.68    | 2,470.35    | <b>9,589.05</b>   |

|                               |                   |                   |                   |                   |                   |
|-------------------------------|-------------------|-------------------|-------------------|-------------------|-------------------|
| 565                           | 2,803.29          | 2,845.76          | 2,793.21          | 2,972.14          | 11,414.41         |
| 566                           | 1,348.82          | 1,296.44          | 1,243.46          | 1,334.11          | 5,222.84          |
| 567                           | 820.46            | 823.52            | 846.67            | 854.09            | 3,344.74          |
| <b>MN - MINNESOTA - Total</b> | <b>110,209.54</b> | <b>110,828.85</b> | <b>110,480.36</b> | <b>115,207.26</b> | <b>446,726.01</b> |

**STATE: MO - MISSOURI**

| REGISTRANT ZIP CODE 3        | 1ST QUARTER       | 2ND QUARTER       | 3RD QUARTER       | 4TH QUARTER       | TOTAL GRAMS       |
|------------------------------|-------------------|-------------------|-------------------|-------------------|-------------------|
| 630                          | 20,086.85         | 19,759.10         | 19,957.13         | 20,260.49         | 80,063.57         |
| 631                          | 39,285.49         | 39,481.88         | 41,948.43         | 54,317.14         | 175,032.94        |
| 633                          | 14,443.59         | 14,621.71         | 15,018.41         | 15,060.95         | 59,144.66         |
| 634                          | 1,147.59          | 1,148.38          | 1,217.80          | 1,190.28          | 4,704.06          |
| 635                          | 1,303.68          | 1,288.99          | 1,240.55          | 1,391.11          | 5,224.33          |
| 636                          | 2,102.50          | 2,012.89          | 2,110.84          | 2,016.59          | 8,242.82          |
| 637                          | 2,238.37          | 2,052.04          | 2,108.16          | 2,180.76          | 8,579.33          |
| 638                          | 1,634.13          | 1,591.61          | 1,604.05          | 1,629.98          | 6,459.77          |
| 639                          | 543.69            | 533.64            | 584.39            | 566.97            | 2,228.70          |
| 640                          | 14,670.15         | 14,785.01         | 15,137.18         | 15,278.09         | 59,870.43         |
| 641                          | 17,566.46         | 18,059.53         | 18,321.52         | 18,155.95         | 72,103.46         |
| 644                          | 654.55            | 638.64            | 677.63            | 679.26            | 2,650.08          |
| 645                          | 1,176.07          | 1,171.94          | 1,113.41          | 1,219.05          | 4,680.46          |
| 646                          | 448.56            | 430.39            | 452.75            | 414.51            | 1,746.21          |
| 647                          | 939.74            | 987.81            | 1,076.43          | 1,061.10          | 4,065.07          |
| 648                          | 1,481.76          | 1,549.49          | 1,608.89          | 1,677.86          | 6,317.99          |
| 650                          | 1,115.67          | 1,192.51          | 1,234.21          | 1,163.36          | 4,705.75          |
| 651                          | 1,156.36          | 1,090.06          | 1,178.42          | 1,228.06          | 4,652.90          |
| 652                          | 5,444.95          | 5,357.69          | 5,386.87          | 5,528.12          | 21,717.63         |
| 653                          | 983.45            | 1,036.15          | 1,047.07          | 1,050.71          | 4,117.38          |
| 654                          | 820.73            | 842.16            | 843.14            | 838.30            | 3,344.33          |
| 655                          | 691.75            | 672.48            | 624.83            | 654.43            | 2,643.49          |
| 656                          | 1,353.66          | 1,325.16          | 1,340.28          | 1,363.71          | 5,382.81          |
| 657                          | 1,847.00          | 2,027.22          | 2,146.73          | 2,098.57          | 8,119.51          |
| 658                          | 3,597.26          | 3,524.35          | 3,576.62          | 3,756.88          | 14,455.11         |
| <b>MO - MISSOURI - Total</b> | <b>136,734.01</b> | <b>137,180.84</b> | <b>141,555.73</b> | <b>154,782.23</b> | <b>570,252.80</b> |

**STATE: MS - MISSISSIPPI**

| REGISTRANT ZIP CODE 3 | 1ST QUARTER | 2ND QUARTER | 3RD QUARTER | 4TH QUARTER | TOTAL GRAMS |
|-----------------------|-------------|-------------|-------------|-------------|-------------|
| 386                   | 9,612.97    | 9,421.73    | 9,816.23    | 9,581.94    | 38,432.87   |
| 387                   | 1,567.16    | 1,483.47    | 1,585.80    | 1,531.55    | 6,167.99    |
| 388                   | 4,700.08    | 4,747.10    | 4,879.21    | 5,026.47    | 19,352.87   |
| 389                   | 1,489.98    | 1,467.13    | 1,503.81    | 1,531.53    | 5,992.45    |
| 390                   | 5,112.01    | 5,066.77    | 5,132.09    | 4,955.38    | 20,266.26   |
| 391                   | 6,191.63    | 6,094.90    | 6,422.35    | 6,268.42    | 24,977.31   |

|                                 |                  |                  |                  |                  |                   |
|---------------------------------|------------------|------------------|------------------|------------------|-------------------|
| 392                             | 5,214.36         | 5,064.20         | 5,539.15         | 5,305.90         | 21,123.61         |
| 393                             | 4,013.25         | 3,870.49         | 3,894.61         | 3,765.56         | 15,543.91         |
| 394                             | 8,957.61         | 8,701.69         | 8,741.32         | 8,704.81         | 35,105.43         |
| 395                             | 9,053.43         | 9,224.65         | 9,517.65         | 9,175.19         | 36,970.92         |
| 396                             | 2,500.84         | 2,417.70         | 2,544.28         | 2,490.12         | 9,952.95          |
| 397                             | 3,545.75         | 3,189.30         | 3,346.02         | 3,379.64         | 13,460.71         |
| <b>MS - MISSISSIPPI - Total</b> | <b>61,959.09</b> | <b>60,749.14</b> | <b>62,922.53</b> | <b>61,716.51</b> | <b>247,347.27</b> |

**STATE: MT - MONTANA**

| REGISTRANT ZIP CODE 3       | 1ST QUARTER      | 2ND QUARTER      | 3RD QUARTER      | 4TH QUARTER      | TOTAL GRAMS      |
|-----------------------------|------------------|------------------|------------------|------------------|------------------|
| 590                         | 663.09           | 617.50           | 647.86           | 685.85           | 2,614.31         |
| 591                         | 2,412.90         | 2,405.28         | 2,501.45         | 2,593.70         | 9,913.33         |
| 592                         | 322.56           | 346.82           | 324.70           | 355.67           | 1,349.76         |
| 593                         | 303.78           | 351.93           | 367.30           | 322.23           | 1,345.24         |
| 594                         | 1,152.62         | 1,195.65         | 1,086.41         | 1,117.20         | 4,551.88         |
| 595                         | 245.07           | 226.24           | 266.69           | 217.97           | 955.96           |
| 596                         | 1,137.57         | 1,197.91         | 1,207.71         | 1,142.02         | 4,685.21         |
| 597                         | 3,324.98         | 3,484.46         | 3,507.85         | 3,781.12         | 14,098.40        |
| 598                         | 3,461.55         | 3,636.78         | 3,638.39         | 3,587.79         | 14,324.51        |
| 599                         | 1,294.27         | 1,252.92         | 1,315.73         | 1,386.31         | 5,249.23         |
| <b>MT - MONTANA - Total</b> | <b>14,318.39</b> | <b>14,715.49</b> | <b>14,864.09</b> | <b>15,189.87</b> | <b>59,087.84</b> |

**STATE: NC - NORTH CAROLINA**

| REGISTRANT ZIP CODE 3 | 1ST QUARTER | 2ND QUARTER | 3RD QUARTER | 4TH QUARTER | TOTAL GRAMS |
|-----------------------|-------------|-------------|-------------|-------------|-------------|
| 270                   | 4,112.56    | 3,884.82    | 4,064.91    | 4,313.28    | 16,375.57   |
| 271                   | 5,847.66    | 5,612.60    | 5,873.55    | 5,969.36    | 23,303.17   |
| 272                   | 11,570.87   | 11,440.27   | 11,916.63   | 12,222.26   | 47,150.03   |
| 273                   | 6,193.39    | 5,955.99    | 6,122.81    | 6,536.71    | 24,808.90   |
| 274                   | 8,150.29    | 7,916.92    | 8,126.10    | 8,400.88    | 32,594.19   |
| 275                   | 24,533.46   | 24,033.13   | 24,433.83   | 26,110.45   | 99,110.87   |
| 276                   | 15,418.97   | 15,096.26   | 15,571.65   | 16,100.55   | 62,187.43   |
| 277                   | 5,970.36    | 5,972.14    | 5,608.17    | 6,128.40    | 23,679.07   |
| 278                   | 9,367.99    | 8,818.44    | 9,103.33    | 9,958.66    | 37,248.42   |
| 279                   | 3,295.37    | 3,411.37    | 3,541.47    | 3,639.75    | 13,887.96   |
| 280                   | 18,751.10   | 18,398.49   | 18,637.12   | 19,342.89   | 75,129.60   |
| 281                   | 12,593.45   | 12,386.92   | 12,822.20   | 13,014.58   | 50,817.14   |
| 282                   | 20,525.87   | 20,173.49   | 20,664.97   | 20,842.66   | 82,206.99   |
| 283                   | 15,389.52   | 15,593.02   | 15,509.27   | 15,959.15   | 62,450.96   |
| 284                   | 17,761.23   | 17,804.45   | 18,176.22   | 19,176.32   | 72,918.21   |
| 285                   | 12,158.70   | 11,731.47   | 11,759.85   | 11,609.70   | 47,259.73   |
| 286                   | 8,353.28    | 8,182.67    | 8,228.34    | 8,591.45    | 33,355.75   |
| 287                   | 7,346.31    | 7,166.57    | 7,581.17    | 7,650.30    | 29,744.36   |

|                                    |                   |                   |                   |                   |                   |
|------------------------------------|-------------------|-------------------|-------------------|-------------------|-------------------|
| 288                                | 4,561.56          | 4,475.23          | 4,597.42          | 4,644.39          | 18,278.61         |
| 289                                | 387.20            | 494.28            | 460.84            | 461.82            | 1,804.14          |
| <b>NC - NORTH CAROLINA - Total</b> | <b>212,289.15</b> | <b>208,548.54</b> | <b>212,799.85</b> | <b>220,673.55</b> | <b>854,311.09</b> |

**STATE: ND - NORTH DAKOTA**

| REGISTRANT ZIP CODE 3            | 1ST QUARTER     | 2ND QUARTER     | 3RD QUARTER     | 4TH QUARTER     | TOTAL GRAMS      |
|----------------------------------|-----------------|-----------------|-----------------|-----------------|------------------|
| 580                              | 714.95          | 710.00          | 698.87          | 779.60          | 2,903.42         |
| 581                              | 2,277.92        | 2,267.40        | 2,265.07        | 2,343.83        | 9,154.22         |
| 582                              | 1,566.36        | 1,475.85        | 1,495.71        | 1,591.82        | 6,129.74         |
| 583                              | 500.36          | 455.98          | 459.85          | 459.15          | 1,875.34         |
| 584                              | 272.41          | 279.12          | 296.11          | 286.04          | 1,133.67         |
| 585                              | 1,463.35        | 1,470.21        | 1,575.11        | 1,508.92        | 6,017.59         |
| 586                              | 365.99          | 411.62          | 419.79          | 430.43          | 1,627.83         |
| 587                              | 1,384.10        | 1,427.33        | 1,527.97        | 1,467.01        | 5,806.42         |
| 588                              | 654.13          | 685.90          | 748.24          | 770.55          | 2,858.82         |
| <b>ND - NORTH DAKOTA - Total</b> | <b>9,199.58</b> | <b>9,183.41</b> | <b>9,486.72</b> | <b>9,637.35</b> | <b>37,507.06</b> |

**STATE: NE - NEBRASKA**

| REGISTRANT ZIP CODE 3        | 1ST QUARTER      | 2ND QUARTER      | 3RD QUARTER      | 4TH QUARTER      | TOTAL GRAMS       |
|------------------------------|------------------|------------------|------------------|------------------|-------------------|
| 680                          | 2,441.28         | 2,507.91         | 2,561.16         | 2,569.94         | 10,080.30         |
| 681                          | 12,777.74        | 13,120.67        | 13,196.68        | 13,602.20        | 52,697.29         |
| 683                          | 504.12           | 563.82           | 525.49           | 551.56           | 2,144.99          |
| 684                          | 448.17           | 451.49           | 449.29           | 511.62           | 1,860.58          |
| 685                          | 5,564.55         | 5,541.57         | 5,576.96         | 5,779.87         | 22,462.95         |
| 686                          | 485.67           | 474.44           | 489.69           | 490.43           | 1,940.22          |
| 687                          | 1,032.71         | 1,041.98         | 1,105.66         | 1,119.80         | 4,300.15          |
| 688                          | 1,588.63         | 1,561.71         | 1,682.99         | 1,667.84         | 6,501.17          |
| 689                          | 474.77           | 491.85           | 529.10           | 552.02           | 2,047.74          |
| 690                          | 171.31           | 176.53           | 223.29           | 162.47           | 733.61            |
| 691                          | 715.68           | 722.72           | 693.57           | 758.24           | 2,890.20          |
| 692                          | 37.95            | 42.11            | 34.48            | 44.49            | 159.04            |
| 693                          | 517.54           | 543.71           | 553.54           | 585.15           | 2,199.94          |
| <b>NE - NEBRASKA - Total</b> | <b>26,760.12</b> | <b>27,240.52</b> | <b>27,621.89</b> | <b>28,395.64</b> | <b>110,018.17</b> |

**STATE: NH - NEW HAMPSHIRE**

| REGISTRANT ZIP CODE 3 | 1ST QUARTER | 2ND QUARTER | 3RD QUARTER | 4TH QUARTER | TOTAL GRAMS |
|-----------------------|-------------|-------------|-------------|-------------|-------------|
| 030                   | 12,012.72   | 12,268.03   | 12,659.73   | 12,508.25   | 49,448.72   |
| 031                   | 6,390.31    | 6,574.51    | 6,615.70    | 6,612.78    | 26,193.30   |
| 032                   | 2,880.53    | 3,017.27    | 3,017.30    | 2,908.69    | 11,823.79   |
| 033                   | 2,126.19    | 2,180.27    | 2,212.78    | 2,255.74    | 8,774.98    |
| 034                   | 1,480.45    | 1,587.96    | 1,588.83    | 1,616.66    | 6,273.90    |
| 035                   | 558.59      | 557.23      | 664.44      | 690.51      | 2,470.77    |
| 036                   | 93.86       | 105.76      | 113.38      | 121.30      | 434.30      |



|                                   |                  |                  |                  |                  |                   |
|-----------------------------------|------------------|------------------|------------------|------------------|-------------------|
| 037                               | 1,789.63         | 1,854.97         | 1,809.70         | 1,709.66         | <b>7,163.96</b>   |
| 038                               | 11,970.22        | 12,090.40        | 12,628.36        | 12,181.19        | <b>48,870.17</b>  |
| <b>NH - NEW HAMPSHIRE - Total</b> | <b>39,302.49</b> | <b>40,236.40</b> | <b>41,310.22</b> | <b>40,604.80</b> | <b>161,453.90</b> |

**STATE: NJ - NEW JERSEY**

| REGISTRANT ZIP CODE 3          | 1ST QUARTER       | 2ND QUARTER       | 3RD QUARTER       | 4TH QUARTER       | TOTAL GRAMS       |
|--------------------------------|-------------------|-------------------|-------------------|-------------------|-------------------|
| 070                            | 16,620.66         | 17,468.37         | 16,952.82         | 17,868.44         | <b>68,910.29</b>  |
| 071                            | 1,300.43          | 1,361.80          | 1,254.46          | 1,321.90          | <b>5,238.58</b>   |
| 072                            | 625.84            | 717.01            | 639.97            | 686.92            | <b>2,669.74</b>   |
| 073                            | 1,727.54          | 1,818.64          | 1,897.01          | 1,821.62          | <b>7,264.81</b>   |
| 074                            | 6,312.59          | 6,421.64          | 6,637.47          | 6,899.30          | <b>26,271.01</b>  |
| 075                            | 663.34            | 668.56            | 686.13            | 769.25            | <b>2,787.28</b>   |
| 076                            | 5,468.27          | 5,866.39          | 6,060.20          | 6,062.37          | <b>23,457.23</b>  |
| 077                            | 8,590.22          | 8,758.65          | 9,132.54          | 9,170.38          | <b>35,651.79</b>  |
| 078                            | 5,327.77          | 5,625.38          | 5,542.51          | 5,874.74          | <b>22,370.40</b>  |
| 079                            | 4,704.48          | 4,812.09          | 4,940.56          | 4,965.36          | <b>19,422.49</b>  |
| 080                            | 23,650.55         | 23,734.41         | 23,998.17         | 24,376.79         | <b>95,759.91</b>  |
| 081                            | 1,724.93          | 1,833.84          | 1,788.45          | 1,934.61          | <b>7,281.83</b>   |
| 082                            | 3,912.05          | 4,001.55          | 4,239.59          | 3,809.70          | <b>15,962.89</b>  |
| 083                            | 2,568.31          | 2,596.37          | 2,684.45          | 2,725.00          | <b>10,574.13</b>  |
| 084                            | 310.59            | 416.25            | 399.56            | 401.36            | <b>1,527.76</b>   |
| 085                            | 3,484.42          | 3,620.80          | 3,680.88          | 3,646.46          | <b>14,432.56</b>  |
| 086                            | 2,604.96          | 2,813.49          | 2,712.11          | 2,962.65          | <b>11,093.21</b>  |
| 087                            | 6,059.99          | 6,147.22          | 6,220.03          | 6,224.32          | <b>24,651.55</b>  |
| 088                            | 9,559.72          | 9,620.29          | 9,635.23          | 10,094.22         | <b>38,909.47</b>  |
| 089                            | 966.17            | 1,012.11          | 942.08            | 1,081.99          | <b>4,002.35</b>   |
| <b>NJ - NEW JERSEY - Total</b> | <b>106,182.82</b> | <b>109,314.85</b> | <b>110,044.20</b> | <b>112,697.38</b> | <b>438,239.25</b> |

**STATE: NM - NEW MEXICO**

| REGISTRANT ZIP CODE 3 | 1ST QUARTER | 2ND QUARTER | 3RD QUARTER | 4TH QUARTER | TOTAL GRAMS      |
|-----------------------|-------------|-------------|-------------|-------------|------------------|
| 870                   | 626.74      | 637.16      | 654.17      | 678.84      | <b>2,596.91</b>  |
| 871                   | 6,304.23    | 6,299.13    | 6,235.63    | 6,466.14    | <b>25,305.13</b> |
| 873                   | 105.58      | 138.16      | 111.17      | 114.95      | <b>469.85</b>    |
| 874                   | 639.74      | 648.00      | 704.68      | 676.16      | <b>2,668.58</b>  |
| 875                   | 1,942.65    | 1,980.89    | 2,100.76    | 1,901.29    | <b>7,925.58</b>  |
| 877                   | 163.73      | 184.19      | 164.10      | 163.94      | <b>675.96</b>    |
| 878                   | 35.53       | 35.65       | 34.75       | 45.55       | <b>151.49</b>    |
| 879                   | 75.81       | 56.95       | 75.28       | 72.65       | <b>280.69</b>    |
| 880                   | 1,933.72    | 2,041.99    | 2,078.25    | 2,113.30    | <b>8,167.26</b>  |
| 881                   | 370.46      | 387.05      | 343.94      | 370.74      | <b>1,472.20</b>  |
| 882                   | 1,852.12    | 1,858.50    | 1,972.30    | 1,983.35    | <b>7,666.27</b>  |
| 883                   | 869.79      | 868.93      | 954.89      | 919.35      | <b>3,612.96</b>  |

|                                |                  |                  |                  |                  |                  |
|--------------------------------|------------------|------------------|------------------|------------------|------------------|
| 884                            | 47.18            | 66.66            | 33.50            | 56.50            | 203.84           |
| <b>NM - NEW MEXICO - Total</b> | <b>14,967.28</b> | <b>15,203.27</b> | <b>15,463.42</b> | <b>15,562.75</b> | <b>61,196.72</b> |

**STATE: NV - NEVADA**

| REGISTRANT ZIP CODE 3      | 1ST QUARTER      | 2ND QUARTER      | 3RD QUARTER      | 4TH QUARTER      | TOTAL GRAMS       |
|----------------------------|------------------|------------------|------------------|------------------|-------------------|
| 890                        | 6,029.64         | 5,883.62         | 6,069.61         | 6,156.98         | 24,139.85         |
| 891                        | 14,900.53        | 15,335.23        | 15,553.51        | 15,367.59        | 61,156.87         |
| 893                        | 50.24            | 61.64            | 35.51            | 36.57            | 183.96            |
| 894                        | 1,659.48         | 1,658.83         | 1,795.76         | 1,817.83         | 6,931.90          |
| 895                        | 2,859.54         | 2,782.96         | 2,918.55         | 3,018.25         | 11,579.29         |
| 897                        | 524.05           | 526.50           | 542.46           | 555.27           | 2,148.29          |
| 898                        | 422.74           | 478.39           | 514.29           | 498.23           | 1,913.65          |
| <b>NV - NEVADA - Total</b> | <b>26,446.23</b> | <b>26,727.17</b> | <b>27,429.70</b> | <b>27,450.72</b> | <b>108,053.81</b> |

**STATE: NY - NEW YORK**

| REGISTRANT ZIP CODE 3 | 1ST QUARTER | 2ND QUARTER | 3RD QUARTER | 4TH QUARTER | TOTAL GRAMS |
|-----------------------|-------------|-------------|-------------|-------------|-------------|
| 100                   | 50,309.45   | 52,983.32   | 51,866.66   | 53,722.18   | 208,881.61  |
| 101                   | 2,833.97    | 2,866.72    | 2,817.56    | 2,968.87    | 11,487.12   |
| 102                   | 481.68      | 412.27      | 452.74      | 436.34      | 1,783.03    |
| 103                   | 3,379.00    | 3,530.09    | 3,559.46    | 3,812.78    | 14,281.33   |
| 104                   | 3,983.50    | 4,038.74    | 3,800.04    | 4,049.56    | 15,871.84   |
| 105                   | 9,526.14    | 9,720.08    | 9,936.65    | 9,988.15    | 39,171.02   |
| 106                   | 1,257.08    | 1,319.53    | 1,301.98    | 1,157.55    | 5,036.15    |
| 107                   | 1,775.47    | 1,934.11    | 1,906.00    | 1,982.39    | 7,597.97    |
| 108                   | 725.72      | 772.96      | 757.90      | 769.71      | 3,026.29    |
| 109                   | 6,561.00    | 6,772.77    | 6,827.93    | 6,840.78    | 27,002.48   |
| 110                   | 2,612.80    | 2,680.16    | 2,809.18    | 2,821.24    | 10,923.38   |
| 111                   | 2,721.61    | 3,003.90    | 2,931.99    | 3,118.71    | 11,776.22   |
| 112                   | 16,399.87   | 17,240.80   | 16,838.42   | 17,191.51   | 67,670.61   |
| 113                   | 5,563.75    | 5,632.32    | 5,462.62    | 5,674.00    | 22,332.69   |
| 114                   | 1,360.32    | 1,395.37    | 1,293.42    | 1,388.03    | 5,437.14    |
| 115                   | 7,541.86    | 7,752.98    | 7,747.57    | 7,943.33    | 30,985.75   |
| 116                   | 563.02      | 586.42      | 514.58      | 589.92      | 2,253.95    |
| 117                   | 21,434.77   | 21,987.84   | 22,092.59   | 22,614.47   | 88,129.67   |
| 118                   | 1,072.75    | 1,166.69    | 1,104.01    | 1,177.86    | 4,521.32    |
| 119                   | 3,017.30    | 3,296.27    | 3,472.74    | 3,354.59    | 13,140.90   |
| 120                   | 5,328.12    | 5,565.62    | 5,663.33    | 5,753.76    | 22,310.83   |
| 121                   | 4,026.68    | 4,108.91    | 4,114.11    | 4,248.52    | 16,498.23   |
| 122                   | 2,855.62    | 2,991.15    | 2,988.03    | 3,080.15    | 11,914.95   |
| 123                   | 2,295.64    | 2,415.96    | 2,304.32    | 2,410.92    | 9,426.84    |
| 124                   | 2,079.55    | 2,012.46    | 2,061.17    | 2,143.95    | 8,297.13    |
| 125                   | 5,593.21    | 5,821.81    | 5,865.51    | 5,962.98    | 23,243.52   |

|                              |                   |                   |                   |                   |                   |
|------------------------------|-------------------|-------------------|-------------------|-------------------|-------------------|
| 126                          | 1,278.01          | 1,310.46          | 1,318.74          | 1,358.41          | 5,265.62          |
| 127                          | 1,181.17          | 1,267.77          | 1,301.33          | 1,315.26          | 5,065.54          |
| 128                          | 3,415.18          | 3,485.06          | 3,654.17          | 3,646.40          | 14,200.81         |
| 129                          | 2,349.18          | 2,402.99          | 2,510.83          | 2,677.42          | 9,940.41          |
| 130                          | 5,991.46          | 6,117.28          | 6,141.23          | 6,306.51          | 24,556.48         |
| 131                          | 1,981.28          | 1,948.43          | 1,953.29          | 2,090.58          | 7,973.57          |
| 132                          | 3,385.42          | 3,319.75          | 3,440.07          | 3,655.35          | 13,800.60         |
| 133                          | 1,073.09          | 1,082.09          | 1,045.57          | 1,102.10          | 4,302.84          |
| 134                          | 2,009.95          | 2,018.44          | 2,034.85          | 2,091.04          | 8,154.27          |
| 135                          | 985.98            | 986.46            | 931.39            | 991.65            | 3,895.47          |
| 136                          | 2,783.33          | 2,824.13          | 2,959.17          | 3,092.61          | 11,659.23         |
| 137                          | 1,293.83          | 1,276.14          | 1,239.85          | 1,342.26          | 5,152.08          |
| 138                          | 1,611.78          | 1,569.82          | 1,537.81          | 1,554.33          | 6,273.75          |
| 139                          | 1,062.72          | 1,077.36          | 1,006.00          | 1,014.29          | 4,160.37          |
| 140                          | 6,568.28          | 6,527.29          | 6,641.01          | 6,707.00          | 26,443.58         |
| 141                          | 2,740.77          | 2,773.72          | 2,811.06          | 2,869.99          | 11,195.55         |
| 142                          | 9,387.64          | 9,501.43          | 9,523.19          | 9,818.03          | 38,230.29         |
| 143                          | 1,142.36          | 1,298.66          | 1,199.05          | 1,263.84          | 4,903.91          |
| 144                          | 5,910.99          | 5,834.20          | 5,728.42          | 6,041.30          | 23,514.90         |
| 145                          | 5,376.34          | 5,519.41          | 5,311.78          | 5,459.98          | 21,667.52         |
| 146                          | 9,979.43          | 10,083.14         | 10,241.28         | 10,591.68         | 40,895.54         |
| 147                          | 1,572.66          | 1,557.70          | 1,579.44          | 1,533.41          | 6,243.20          |
| 148                          | 3,686.28          | 3,812.03          | 3,650.12          | 3,793.18          | 14,941.60         |
| 149                          | 913.77            | 943.16            | 903.10            | 947.49            | 3,707.52          |
| <b>NY - NEW YORK - Total</b> | <b>242,980.79</b> | <b>250,546.17</b> | <b>249,153.25</b> | <b>256,466.39</b> | <b>999,146.60</b> |

**STATE: OH - OHIO**

| REGISTRANT ZIP CODE 3 | 1ST QUARTER | 2ND QUARTER | 3RD QUARTER | 4TH QUARTER | TOTAL GRAMS |
|-----------------------|-------------|-------------|-------------|-------------|-------------|
| 430                   | 16,045.89   | 16,024.53   | 16,576.14   | 17,118.00   | 65,764.57   |
| 431                   | 6,168.77    | 6,258.54    | 6,343.84    | 6,539.92    | 25,311.07   |
| 432                   | 29,005.44   | 24,444.74   | 14,384.57   | 14,874.07   | 82,708.81   |
| 433                   | 2,389.24    | 2,448.64    | 2,372.89    | 2,415.01    | 9,625.78    |
| 434                   | 2,189.13    | 2,179.96    | 2,257.24    | 2,409.81    | 9,036.13    |
| 435                   | 5,489.62    | 5,588.02    | 5,653.84    | 5,824.03    | 22,555.51   |
| 436                   | 8,696.57    | 8,823.15    | 8,901.44    | 9,349.09    | 35,770.24   |
| 437                   | 1,666.85    | 1,691.68    | 1,624.86    | 1,723.65    | 6,707.03    |
| 438                   | 234.56      | 267.88      | 260.99      | 231.74      | 995.17      |
| 439                   | 2,097.23    | 2,043.07    | 2,059.32    | 2,194.44    | 8,394.07    |
| 440                   | 15,328.55   | 15,430.81   | 15,607.83   | 16,048.33   | 62,415.52   |
| 441                   | 21,040.63   | 21,095.13   | 21,706.08   | 22,230.16   | 86,071.99   |
| 442                   | 8,576.07    | 8,363.29    | 8,511.73    | 8,809.98    | 34,261.07   |

|                          |                   |                   |                   |                   |                   |
|--------------------------|-------------------|-------------------|-------------------|-------------------|-------------------|
| 443                      | 3,881.06          | 4,060.54          | 3,993.08          | 4,038.44          | 15,973.12         |
| 444                      | 4,737.57          | 4,711.36          | 4,582.85          | 4,952.02          | 18,983.80         |
| 445                      | 4,862.19          | 5,012.59          | 5,001.28          | 5,129.21          | 20,005.27         |
| 446                      | 5,961.67          | 5,931.19          | 5,817.58          | 5,966.91          | 23,677.35         |
| 447                      | 5,276.03          | 5,100.24          | 5,263.05          | 5,347.37          | 20,986.70         |
| 448                      | 3,500.77          | 3,465.65          | 3,368.02          | 3,460.57          | 13,795.01         |
| 449                      | 887.77            | 909.25            | 902.86            | 908.92            | 3,608.79          |
| 450                      | 15,396.61         | 15,560.96         | 15,778.41         | 15,982.07         | 62,718.04         |
| 451                      | 5,492.36          | 5,568.67          | 5,659.80          | 5,656.90          | 22,377.74         |
| 452                      | 21,678.05         | 21,711.42         | 21,940.24         | 22,609.87         | 87,939.59         |
| 453                      | 5,093.83          | 5,071.12          | 5,010.22          | 5,418.81          | 20,593.98         |
| 454                      | 6,182.26          | 6,159.66          | 6,152.45          | 6,575.47          | 25,069.83         |
| 455                      | 1,445.53          | 1,401.37          | 1,400.05          | 1,412.17          | 5,659.12          |
| 456                      | 3,858.29          | 3,695.07          | 3,631.13          | 3,839.74          | 15,024.23         |
| 457                      | 3,083.11          | 2,838.21          | 2,778.42          | 2,709.56          | 11,409.29         |
| 458                      | 3,534.24          | 3,524.16          | 3,501.31          | 3,701.42          | 14,261.13         |
| <b>OH - OHIO - Total</b> | <b>213,799.88</b> | <b>209,380.92</b> | <b>201,041.51</b> | <b>207,477.66</b> | <b>831,699.97</b> |

**STATE: OK - OKLAHOMA**

| REGISTRANT ZIP CODE 3        | 1ST QUARTER      | 2ND QUARTER      | 3RD QUARTER      | 4TH QUARTER      | TOTAL GRAMS       |
|------------------------------|------------------|------------------|------------------|------------------|-------------------|
| 730                          | 10,944.45        | 10,982.10        | 11,369.38        | 11,539.53        | 44,835.45         |
| 731                          | 9,455.17         | 9,474.07         | 9,878.96         | 9,562.28         | 38,370.48         |
| 734                          | 986.49           | 968.79           | 991.67           | 997.33           | 3,944.28          |
| 735                          | 2,526.33         | 2,574.63         | 2,684.84         | 2,221.26         | 10,007.05         |
| 736                          | 270.40           | 256.44           | 279.74           | 293.29           | 1,099.87          |
| 737                          | 1,046.63         | 1,012.95         | 1,159.24         | 1,133.77         | 4,352.59          |
| 738                          | 183.62           | 182.60           | 148.10           | 174.02           | 688.34            |
| 739                          | 63.86            | 72.52            | 78.16            | 76.31            | 290.85            |
| 740                          | 12,408.32        | 12,203.69        | 11,878.66        | 12,225.72        | 48,716.39         |
| 741                          | 9,934.51         | 9,755.99         | 9,777.98         | 9,852.38         | 39,320.85         |
| 743                          | 948.97           | 1,032.86         | 1,026.06         | 1,095.83         | 4,103.71          |
| 744                          | 2,683.85         | 2,421.67         | 2,529.70         | 2,581.29         | 10,216.51         |
| 745                          | 504.77           | 504.48           | 451.59           | 477.90           | 1,938.74          |
| 746                          | 324.01           | 275.21           | 277.71           | 324.95           | 1,201.89          |
| 747                          | 647.32           | 701.87           | 664.82           | 748.19           | 2,762.20          |
| 748                          | 1,389.30         | 1,365.54         | 1,391.34         | 1,421.62         | 5,567.80          |
| 749                          | 444.90           | 411.95           | 407.59           | 399.05           | 1,663.50          |
| <b>OK - OKLAHOMA - Total</b> | <b>54,762.92</b> | <b>54,197.33</b> | <b>54,995.55</b> | <b>55,124.71</b> | <b>219,080.50</b> |

**STATE: OR - OREGON**

| REGISTRANT ZIP CODE 3 | 1ST QUARTER | 2ND QUARTER | 3RD QUARTER | 4TH QUARTER | TOTAL GRAMS |
|-----------------------|-------------|-------------|-------------|-------------|-------------|
| 970                   | 12,954.46   | 13,619.58   | 13,507.51   | 13,577.57   | 53,659.12   |

|                            |                  |                  |                  |                  |                   |
|----------------------------|------------------|------------------|------------------|------------------|-------------------|
| 971                        | 5,104.96         | 5,423.74         | 5,189.39         | 5,433.51         | 21,151.59         |
| 972                        | 19,003.20        | 19,640.89        | 19,744.20        | 20,147.70        | 78,535.99         |
| 973                        | 8,733.99         | 8,871.19         | 8,246.63         | 8,760.21         | 34,612.02         |
| 974                        | 7,003.60         | 7,295.85         | 7,204.29         | 7,484.46         | 28,988.20         |
| 975                        | 2,375.07         | 2,471.96         | 2,418.91         | 2,559.99         | 9,825.93          |
| 976                        | 457.22           | 510.62           | 429.40           | 484.69           | 1,881.92          |
| 977                        | 3,706.56         | 4,113.17         | 4,133.17         | 4,163.48         | 16,116.39         |
| 978                        | 901.99           | 854.37           | 943.07           | 979.30           | 3,678.74          |
| 979                        | 338.88           | 366.06           | 365.94           | 400.59           | 1,471.47          |
| <b>OR - OREGON - Total</b> | <b>60,579.93</b> | <b>63,167.43</b> | <b>62,182.52</b> | <b>63,991.50</b> | <b>249,921.37</b> |

**STATE: PA - PENNSYLVANIA**

| REGISTRANT ZIP CODE 3 | 1ST QUARTER | 2ND QUARTER | 3RD QUARTER | 4TH QUARTER | TOTAL GRAMS |
|-----------------------|-------------|-------------|-------------|-------------|-------------|
| 150                   | 6,621.40    | 6,494.96    | 6,572.83    | 6,655.31    | 26,344.50   |
| 151                   | 5,445.24    | 5,508.83    | 5,461.86    | 5,590.49    | 22,006.42   |
| 152                   | 11,350.88   | 11,313.10   | 11,199.40   | 11,702.09   | 45,565.47   |
| 153                   | 2,458.68    | 2,451.16    | 2,457.52    | 2,604.52    | 9,971.88    |
| 154                   | 1,906.65    | 1,894.74    | 1,740.17    | 1,940.79    | 7,482.35    |
| 155                   | 944.30      | 953.16      | 976.74      | 1,024.41    | 3,898.61    |
| 156                   | 4,407.00    | 4,411.98    | 4,341.68    | 4,362.38    | 17,523.04   |
| 157                   | 1,396.64    | 1,416.40    | 1,314.66    | 1,285.93    | 5,413.63    |
| 158                   | 1,248.78    | 1,285.28    | 1,276.63    | 1,288.02    | 5,098.71    |
| 159                   | 1,465.59    | 1,381.22    | 1,363.63    | 1,383.98    | 5,594.43    |
| 160                   | 3,137.55    | 3,154.21    | 3,192.87    | 3,347.89    | 12,832.52   |
| 161                   | 2,721.80    | 2,663.93    | 2,702.67    | 2,702.92    | 10,791.32   |
| 162                   | 968.45      | 980.10      | 977.26      | 934.51      | 3,860.32    |
| 163                   | 1,913.04    | 1,839.57    | 1,780.72    | 1,817.49    | 7,350.83    |
| 164                   | 1,000.01    | 939.11      | 1,004.54    | 1,047.55    | 3,991.21    |
| 165                   | 4,226.55    | 4,167.38    | 4,181.79    | 4,319.92    | 16,895.65   |
| 166                   | 2,893.04    | 2,916.83    | 2,812.74    | 2,799.57    | 11,422.17   |
| 167                   | 591.45      | 592.79      | 591.82      | 571.13      | 2,347.19    |
| 168                   | 2,885.94    | 2,710.57    | 2,761.48    | 2,788.58    | 11,146.56   |
| 169                   | 511.20      | 439.92      | 484.52      | 532.78      | 1,968.43    |
| 170                   | 11,878.78   | 11,937.95   | 11,731.78   | 11,899.54   | 47,448.05   |
| 171                   | 2,990.35    | 3,148.84    | 3,015.22    | 3,115.22    | 12,269.64   |
| 172                   | 3,382.14    | 3,239.78    | 3,376.54    | 3,409.18    | 13,407.63   |
| 173                   | 5,479.34    | 5,398.02    | 5,680.70    | 5,694.23    | 22,252.30   |
| 174                   | 4,071.19    | 4,204.16    | 4,046.41    | 4,128.48    | 16,450.24   |
| 175                   | 3,862.69    | 3,862.68    | 3,644.10    | 3,727.30    | 15,096.76   |
| 176                   | 4,097.94    | 4,327.06    | 4,225.90    | 4,239.43    | 16,890.33   |
| 177                   | 2,224.00    | 2,157.72    | 2,113.76    | 2,256.69    | 8,752.18    |

|                                  |                   |                   |                   |                   |                   |
|----------------------------------|-------------------|-------------------|-------------------|-------------------|-------------------|
| 178                              | 2,691.66          | 2,583.46          | 2,616.49          | 2,654.54          | 10,546.15         |
| 179                              | 877.24            | 816.24            | 825.59            | 824.15            | 3,343.22          |
| 180                              | 5,596.90          | 6,007.09          | 6,017.10          | 5,959.34          | 23,580.42         |
| 181                              | 2,773.06          | 3,164.67          | 2,959.65          | 2,785.98          | 11,683.37         |
| 182                              | 927.58            | 940.45            | 950.36            | 928.05            | 3,746.45          |
| 183                              | 1,462.45          | 1,484.96          | 1,543.92          | 1,463.71          | 5,955.04          |
| 184                              | 2,484.13          | 2,535.66          | 2,728.95          | 2,574.24          | 10,322.98         |
| 185                              | 3,849.46          | 3,777.76          | 3,996.53          | 3,719.77          | 15,343.51         |
| 186                              | 1,928.13          | 1,873.43          | 2,005.67          | 1,894.84          | 7,702.07          |
| 187                              | 16,419.90         | 17,304.06         | 18,075.61         | 16,518.03         | 68,317.60         |
| 188                              | 607.94            | 614.98            | 614.43            | 617.29            | 2,454.65          |
| 189                              | 7,645.13          | 7,615.09          | 7,543.23          | 7,543.83          | 30,347.28         |
| 190                              | 22,854.93         | 23,364.99         | 22,846.56         | 23,266.14         | 92,332.62         |
| 191                              | 20,525.53         | 21,162.95         | 20,274.20         | 20,897.15         | 82,859.83         |
| 193                              | 10,421.40         | 10,328.16         | 10,117.81         | 10,352.20         | 41,219.58         |
| 194                              | 11,217.77         | 11,346.04         | 11,056.26         | 11,230.34         | 44,850.42         |
| 195                              | 1,898.75          | 1,857.24          | 1,863.39          | 1,915.17          | 7,534.55          |
| 196                              | 3,137.42          | 3,073.27          | 3,209.91          | 3,132.74          | 12,553.33         |
| <b>PA - PENNSYLVANIA - Total</b> | <b>213,400.03</b> | <b>215,641.98</b> | <b>214,275.61</b> | <b>215,447.84</b> | <b>858,765.46</b> |

**STATE: PR - PUERTO RICO**

| REGISTRANT ZIP CODE 3           | 1ST QUARTER     | 2ND QUARTER     | 3RD QUARTER     | 4TH QUARTER     | TOTAL GRAMS      |
|---------------------------------|-----------------|-----------------|-----------------|-----------------|------------------|
| 006                             | 2,197.55        | 2,084.17        | 2,131.48        | 2,191.07        | 8,604.27         |
| 007                             | 2,091.40        | 2,138.57        | 2,151.87        | 2,285.66        | 8,667.50         |
| 009                             | 5,281.20        | 4,981.33        | 5,008.74        | 5,312.57        | 20,583.83        |
| <b>PR - PUERTO RICO - Total</b> | <b>9,570.15</b> | <b>9,204.07</b> | <b>9,292.09</b> | <b>9,789.29</b> | <b>37,855.60</b> |

**STATE: RI - RHODE ISLAND**

| REGISTRANT ZIP CODE 3            | 1ST QUARTER      | 2ND QUARTER      | 3RD QUARTER      | 4TH QUARTER      | TOTAL GRAMS       |
|----------------------------------|------------------|------------------|------------------|------------------|-------------------|
| 028                              | 24,110.00        | 24,436.82        | 24,991.70        | 24,638.37        | 98,176.89         |
| 029                              | 13,982.55        | 13,951.08        | 14,387.98        | 14,017.43        | 56,339.05         |
| <b>RI - RHODE ISLAND - Total</b> | <b>38,092.55</b> | <b>38,387.90</b> | <b>39,379.68</b> | <b>38,655.81</b> | <b>154,515.93</b> |

**STATE: SC - SOUTH CAROLINA**

| REGISTRANT ZIP CODE 3 | 1ST QUARTER | 2ND QUARTER | 3RD QUARTER | 4TH QUARTER | TOTAL GRAMS |
|-----------------------|-------------|-------------|-------------|-------------|-------------|
| 290                   | 12,248.12   | 11,898.83   | 12,107.35   | 12,355.06   | 48,609.35   |
| 291                   | 9,925.99    | 9,533.76    | 9,656.97    | 9,796.77    | 38,913.49   |
| 292                   | 10,506.55   | 9,924.22    | 10,486.09   | 10,208.35   | 41,125.21   |
| 293                   | 8,723.08    | 8,394.19    | 8,626.83    | 8,806.04    | 34,550.13   |
| 294                   | 33,840.12   | 33,122.31   | 35,253.86   | 34,658.48   | 136,874.77  |
| 295                   | 18,273.45   | 18,075.70   | 18,565.23   | 18,643.35   | 73,557.72   |
| 296                   | 28,955.58   | 28,212.96   | 30,040.86   | 29,811.91   | 117,021.31  |
| 297                   | 8,160.57    | 8,097.23    | 8,220.48    | 8,404.85    | 32,883.14   |

|                                    |                   |                   |                   |                   |                   |
|------------------------------------|-------------------|-------------------|-------------------|-------------------|-------------------|
| 298                                | 4,580.89          | 4,469.43          | 4,446.02          | 4,457.72          | 17,954.06         |
| 299                                | 4,075.23          | 3,966.66          | 4,204.97          | 4,021.28          | 16,268.14         |
| <b>SC - SOUTH CAROLINA - Total</b> | <b>139,289.57</b> | <b>135,695.31</b> | <b>141,608.66</b> | <b>141,163.81</b> | <b>557,757.34</b> |

**STATE: SD - SOUTH DAKOTA**

| REGISTRANT ZIP CODE 3            | 1ST QUARTER      | 2ND QUARTER      | 3RD QUARTER      | 4TH QUARTER      | TOTAL GRAMS      |
|----------------------------------|------------------|------------------|------------------|------------------|------------------|
| 570                              | 2,201.03         | 2,082.26         | 2,242.85         | 2,168.13         | 8,694.28         |
| 571                              | 8,562.87         | 7,818.21         | 7,837.16         | 8,121.49         | 32,339.73        |
| 572                              | 682.49           | 639.48           | 642.93           | 664.19           | 2,629.08         |
| 573                              | 619.07           | 634.03           | 648.85           | 623.18           | 2,525.13         |
| 574                              | 773.04           | 712.68           | 736.63           | 728.70           | 2,951.06         |
| 575                              | 273.00           | 284.24           | 284.56           | 326.98           | 1,168.78         |
| 576                              | 51.10            | 63.89            | 47.19            | 40.71            | 202.90           |
| 577                              | 2,635.54         | 2,606.70         | 2,763.11         | 2,655.26         | 10,660.60        |
| <b>SD - SOUTH DAKOTA - Total</b> | <b>15,798.14</b> | <b>14,841.50</b> | <b>15,203.28</b> | <b>15,328.63</b> | <b>61,171.55</b> |

**STATE: TN - TENNESSEE**

| REGISTRANT ZIP CODE 3         | 1ST QUARTER       | 2ND QUARTER       | 3RD QUARTER       | 4TH QUARTER       | TOTAL GRAMS       |
|-------------------------------|-------------------|-------------------|-------------------|-------------------|-------------------|
| 370                           | 20,985.55         | 20,702.56         | 21,530.96         | 20,921.20         | 84,140.27         |
| 371                           | 13,296.47         | 13,166.78         | 13,606.57         | 13,708.76         | 53,778.58         |
| 372                           | 14,660.40         | 15,040.93         | 15,256.25         | 15,417.49         | 60,375.07         |
| 373                           | 12,183.26         | 11,930.30         | 12,261.85         | 12,076.73         | 48,452.14         |
| 374                           | 9,116.69          | 8,927.84          | 9,210.06          | 8,895.77          | 36,150.36         |
| 376                           | 4,206.60          | 4,187.01          | 4,258.67          | 4,188.22          | 16,840.51         |
| 377                           | 4,525.86          | 4,481.97          | 4,589.87          | 4,497.13          | 18,094.83         |
| 378                           | 7,027.44          | 6,791.30          | 7,217.27          | 7,043.82          | 28,079.84         |
| 379                           | 11,867.60         | 11,716.55         | 11,988.00         | 12,166.94         | 47,739.09         |
| 380                           | 10,015.37         | 10,188.37         | 10,463.08         | 10,597.67         | 41,264.50         |
| 381                           | 12,169.55         | 12,611.55         | 12,870.08         | 12,879.28         | 50,530.46         |
| 382                           | 3,294.80          | 3,230.74          | 3,301.74          | 3,142.49          | 12,969.77         |
| 383                           | 4,744.74          | 4,767.02          | 4,917.46          | 4,708.91          | 19,138.13         |
| 384                           | 3,393.79          | 3,321.36          | 3,405.85          | 3,381.34          | 13,502.33         |
| 385                           | 2,206.12          | 2,238.66          | 2,233.01          | 2,174.76          | 8,852.55          |
| <b>TN - TENNESSEE - Total</b> | <b>133,694.24</b> | <b>133,302.95</b> | <b>137,110.71</b> | <b>135,800.52</b> | <b>539,908.42</b> |

**STATE: TX - TEXAS**

| REGISTRANT ZIP CODE 3 | 1ST QUARTER | 2ND QUARTER | 3RD QUARTER | 4TH QUARTER | TOTAL GRAMS |
|-----------------------|-------------|-------------|-------------|-------------|-------------|
| 750                   | 53,645.99   | 53,634.79   | 56,108.76   | 57,045.92   | 220,435.46  |
| 751                   | 9,243.13    | 9,526.36    | 10,015.47   | 10,204.07   | 38,989.03   |
| 752                   | 26,851.67   | 28,315.16   | 28,289.79   | 29,437.43   | 112,894.04  |
| 753                   | 51.02       | 51.92       | 41.41       | 49.96       | 194.31      |
| 754                   | 4,350.55    | 4,495.99    | 4,563.22    | 4,906.28    | 18,316.04   |
| 755                   | 1,266.55    | 1,173.26    | 1,326.55    | 1,352.52    | 5,118.88    |

|     |           |           |           |           |                   |
|-----|-----------|-----------|-----------|-----------|-------------------|
| 756 | 3,875.56  | 4,001.92  | 4,276.64  | 4,227.43  | <b>16,381.55</b>  |
| 757 | 5,157.41  | 5,135.48  | 5,242.46  | 5,357.34  | <b>20,892.70</b>  |
| 758 | 858.88    | 780.19    | 836.57    | 841.78    | <b>3,317.42</b>   |
| 759 | 2,584.65  | 2,462.03  | 2,624.42  | 2,687.35  | <b>10,358.46</b>  |
| 760 | 24,994.43 | 24,512.16 | 25,873.51 | 25,748.87 | <b>101,128.97</b> |
| 761 | 15,047.06 | 15,292.17 | 15,667.98 | 15,889.51 | <b>61,896.71</b>  |
| 762 | 12,338.02 | 12,554.05 | 12,995.21 | 13,380.22 | <b>51,267.50</b>  |
| 763 | 3,616.56  | 3,502.77  | 3,674.42  | 3,539.75  | <b>14,333.50</b>  |
| 764 | 1,449.87  | 1,478.37  | 1,467.84  | 1,404.38  | <b>5,800.45</b>   |
| 765 | 6,019.28  | 5,826.93  | 6,321.15  | 6,102.18  | <b>24,269.55</b>  |
| 766 | 1,170.44  | 1,217.39  | 1,157.16  | 1,219.43  | <b>4,764.43</b>   |
| 767 | 3,620.63  | 3,399.50  | 3,673.14  | 3,636.67  | <b>14,329.95</b>  |
| 768 | 818.14    | 864.09    | 832.78    | 868.66    | <b>3,383.67</b>   |
| 769 | 1,847.49  | 1,761.31  | 1,807.32  | 1,917.45  | <b>7,333.58</b>   |
| 770 | 40,383.78 | 41,990.26 | 42,049.68 | 42,543.61 | <b>166,967.33</b> |
| 772 | 43.18     | 34.29     | 25.19     | 17.83     | <b>120.49</b>     |
| 773 | 30,148.70 | 30,417.52 | 31,819.89 | 31,869.59 | <b>124,255.70</b> |
| 774 | 22,069.75 | 21,641.73 | 22,633.65 | 23,261.12 | <b>89,606.25</b>  |
| 775 | 24,021.97 | 24,504.46 | 25,293.40 | 25,829.50 | <b>99,649.33</b>  |
| 776 | 5,016.12  | 4,984.02  | 5,412.02  | 5,252.29  | <b>20,664.45</b>  |
| 777 | 2,507.28  | 2,460.30  | 2,644.49  | 2,583.77  | <b>10,195.83</b>  |
| 778 | 7,242.91  | 6,958.61  | 7,244.98  | 7,233.40  | <b>28,679.91</b>  |
| 779 | 2,211.34  | 2,191.68  | 2,333.92  | 2,327.38  | <b>9,064.32</b>   |
| 780 | 5,074.83  | 5,022.91  | 5,261.61  | 5,314.56  | <b>20,673.91</b>  |
| 781 | 6,396.42  | 6,333.43  | 6,997.60  | 6,670.21  | <b>26,397.67</b>  |
| 782 | 27,883.77 | 27,945.78 | 29,571.06 | 28,941.74 | <b>114,342.35</b> |
| 783 | 1,925.16  | 2,046.14  | 2,002.88  | 2,109.94  | <b>8,084.11</b>   |
| 784 | 5,046.14  | 4,782.55  | 5,011.38  | 5,208.79  | <b>20,048.85</b>  |
| 785 | 3,357.75  | 3,305.44  | 3,463.12  | 3,538.38  | <b>13,664.69</b>  |
| 786 | 18,122.31 | 18,424.99 | 19,555.08 | 19,487.57 | <b>75,589.95</b>  |
| 787 | 29,361.71 | 30,592.17 | 31,792.43 | 32,990.00 | <b>124,736.31</b> |
| 788 | 652.60    | 642.77    | 724.59    | 670.21    | <b>2,690.16</b>   |
| 789 | 725.31    | 734.44    | 819.52    | 769.10    | <b>3,048.37</b>   |
| 790 | 906.91    | 836.42    | 799.36    | 936.94    | <b>3,479.62</b>   |
| 791 | 1,942.02  | 2,089.78  | 1,994.88  | 2,232.08  | <b>8,258.76</b>   |
| 792 | 84.08     | 91.29     | 76.16     | 80.27     | <b>331.80</b>     |
| 793 | 493.40    | 472.02    | 482.95    | 547.98    | <b>1,996.34</b>   |
| 794 | 4,770.67  | 4,722.96  | 4,721.57  | 5,011.32  | <b>19,226.50</b>  |
| 795 | 523.70    | 556.02    | 502.00    | 550.58    | <b>2,132.30</b>   |
| 796 | 2,314.08  | 2,364.04  | 2,364.09  | 2,499.79  | <b>9,542.00</b>   |



|                           |                   |                   |                   |                   |                     |
|---------------------------|-------------------|-------------------|-------------------|-------------------|---------------------|
| 797                       | 6,602.56          | 6,666.97          | 7,053.06          | 7,172.96          | 27,495.55           |
| 798                       | 245.15            | 247.71            | 246.16            | 252.04            | 991.06              |
| 799                       | 3,256.17          | 3,378.66          | 3,877.51          | 3,335.57          | 13,847.91           |
| <b>TX - TEXAS - Total</b> | <b>432,137.12</b> | <b>436,425.19</b> | <b>453,570.03</b> | <b>459,055.68</b> | <b>1,781,188.02</b> |

**STATE: UT - UTAH**

| REGISTRANT ZIP CODE 3    | 1ST QUARTER      | 2ND QUARTER      | 3RD QUARTER      | 4TH QUARTER      | TOTAL GRAMS       |
|--------------------------|------------------|------------------|------------------|------------------|-------------------|
| 840                      | 44,095.47        | 44,666.27        | 45,665.84        | 47,857.17        | 182,284.76        |
| 841                      | 17,205.76        | 17,390.24        | 17,896.57        | 18,674.10        | 71,166.68         |
| 843                      | 4,725.93         | 4,600.90         | 4,738.56         | 4,939.11         | 19,004.51         |
| 844                      | 4,384.45         | 4,332.32         | 4,618.39         | 4,663.00         | 17,998.16         |
| 845                      | 651.88           | 700.90           | 627.35           | 671.93           | 2,652.07          |
| 846                      | 9,171.07         | 9,171.45         | 9,628.68         | 9,997.40         | 37,968.61         |
| 847                      | 6,743.33         | 6,984.23         | 6,867.50         | 7,019.20         | 27,614.26         |
| <b>UT - UTAH - Total</b> | <b>86,977.90</b> | <b>87,846.30</b> | <b>90,042.90</b> | <b>93,821.93</b> | <b>358,689.03</b> |

**STATE: VA - VIRGINIA**

| REGISTRANT ZIP CODE 3 | 1ST QUARTER | 2ND QUARTER | 3RD QUARTER | 4TH QUARTER | TOTAL GRAMS |
|-----------------------|-------------|-------------|-------------|-------------|-------------|
| 201                   | 18,236.50   | 19,107.10   | 19,234.77   | 19,151.42   | 75,729.79   |
| 220                   | 10,613.91   | 11,095.39   | 11,124.69   | 10,295.26   | 43,129.25   |
| 221                   | 6,731.15    | 7,502.84    | 7,390.98    | 7,247.29    | 28,872.26   |
| 222                   | 4,795.97    | 4,905.54    | 5,092.61    | 4,964.46    | 19,758.58   |
| 223                   | 4,233.64    | 4,236.28    | 4,335.79    | 4,375.87    | 17,181.59   |
| 224                   | 4,878.77    | 4,810.00    | 4,782.32    | 4,962.54    | 19,433.62   |
| 225                   | 2,157.56    | 2,071.48    | 2,126.74    | 2,192.79    | 8,548.56    |
| 226                   | 3,380.71    | 3,494.15    | 3,524.11    | 3,456.95    | 13,855.92   |
| 227                   | 1,141.79    | 1,163.67    | 1,088.25    | 1,244.37    | 4,638.08    |
| 228                   | 3,180.04    | 2,912.94    | 3,038.30    | 3,197.80    | 12,329.08   |
| 229                   | 6,526.43    | 6,454.34    | 6,688.01    | 6,674.25    | 26,343.04   |
| 230                   | 5,049.23    | 4,793.05    | 5,099.36    | 5,122.89    | 20,064.53   |
| 231                   | 12,168.50   | 12,046.09   | 12,158.24   | 12,596.01   | 48,968.84   |
| 232                   | 16,538.14   | 16,140.38   | 16,523.91   | 16,719.18   | 65,921.61   |
| 233                   | 10,062.38   | 9,720.02    | 9,835.59    | 10,025.44   | 39,643.43   |
| 234                   | 24,619.56   | 24,806.07   | 25,090.33   | 25,113.00   | 99,628.96   |
| 235                   | 6,147.66    | 6,172.15    | 5,993.34    | 6,034.13    | 24,347.28   |
| 236                   | 10,020.47   | 9,718.92    | 10,136.62   | 9,756.15    | 39,632.15   |
| 237                   | 4,420.99    | 4,072.40    | 4,328.94    | 3,732.25    | 16,554.57   |
| 238                   | 6,857.80    | 6,771.36    | 6,826.14    | 7,008.35    | 27,463.65   |
| 239                   | 966.73      | 976.53      | 986.51      | 998.48      | 3,928.25    |
| 240                   | 5,389.37    | 5,306.41    | 5,435.56    | 5,633.43    | 21,764.77   |
| 241                   | 2,704.17    | 2,668.51    | 2,757.50    | 2,786.14    | 10,916.33   |
| 242                   | 1,348.39    | 1,205.97    | 1,274.58    | 1,243.35    | 5,072.29    |

|                              |                   |                   |                   |                   |                   |
|------------------------------|-------------------|-------------------|-------------------|-------------------|-------------------|
| 243                          | 866.75            | 788.94            | 925.80            | 957.73            | 3,539.22          |
| 244                          | 3,365.85          | 3,297.13          | 3,523.36          | 3,438.56          | 13,624.90         |
| 245                          | 5,488.87          | 5,083.43          | 5,476.47          | 5,216.35          | 21,265.13         |
| 246                          | 417.51            | 451.29            | 454.00            | 422.49            | 1,745.29          |
| <b>VA - VIRGINIA - Total</b> | <b>182,308.82</b> | <b>181,772.40</b> | <b>185,252.82</b> | <b>184,566.91</b> | <b>733,900.96</b> |

**STATE: VI - VIRGIN ISLANDS**

| REGISTRANT ZIP CODE 3              | 1ST QUARTER   | 2ND QUARTER   | 3RD QUARTER   | 4TH QUARTER   | TOTAL GRAMS     |
|------------------------------------|---------------|---------------|---------------|---------------|-----------------|
| 008                                | 308.38        | 333.01        | 348.04        | 335.67        | 1,325.10        |
| <b>VI - VIRGIN ISLANDS - Total</b> | <b>308.38</b> | <b>333.01</b> | <b>348.04</b> | <b>335.67</b> | <b>1,325.10</b> |

**STATE: VT - VERMONT**

| REGISTRANT ZIP CODE 3       | 1ST QUARTER      | 2ND QUARTER      | 3RD QUARTER      | 4TH QUARTER      | TOTAL GRAMS      |
|-----------------------------|------------------|------------------|------------------|------------------|------------------|
| 050                         | 590.25           | 616.75           | 613.33           | 588.99           | 2,409.32         |
| 051                         | 565.90           | 529.42           | 577.22           | 573.89           | 2,246.44         |
| 052                         | 709.74           | 784.54           | 711.61           | 735.53           | 2,941.42         |
| 053                         | 1,611.16         | 1,569.25         | 1,603.86         | 1,602.88         | 6,387.16         |
| 054                         | 3,441.38         | 3,392.21         | 3,474.89         | 3,561.44         | 13,869.93        |
| 056                         | 1,614.90         | 1,624.96         | 1,676.23         | 1,663.87         | 6,579.97         |
| 057                         | 906.75           | 845.03           | 817.61           | 832.75           | 3,402.14         |
| 058                         | 635.88           | 668.00           | 683.97           | 713.48           | 2,701.33         |
| <b>VT - VERMONT - Total</b> | <b>10,075.97</b> | <b>10,030.16</b> | <b>10,158.72</b> | <b>10,272.84</b> | <b>40,537.69</b> |

**STATE: WA - WASHINGTON**

| REGISTRANT ZIP CODE 3          | 1ST QUARTER       | 2ND QUARTER       | 3RD QUARTER       | 4TH QUARTER       | TOTAL GRAMS       |
|--------------------------------|-------------------|-------------------|-------------------|-------------------|-------------------|
| 980                            | 27,685.73         | 28,513.26         | 27,960.99         | 29,204.59         | 113,364.58        |
| 981                            | 18,087.79         | 18,816.72         | 18,463.78         | 19,544.08         | 74,912.37         |
| 982                            | 16,384.84         | 17,085.82         | 17,243.72         | 17,339.03         | 68,053.41         |
| 983                            | 10,990.31         | 11,331.77         | 11,164.82         | 11,332.84         | 44,819.74         |
| 984                            | 7,476.66          | 7,558.07          | 7,249.48          | 7,429.69          | 29,713.89         |
| 985                            | 5,578.38          | 5,787.40          | 5,679.80          | 5,811.71          | 22,857.29         |
| 986                            | 8,382.97          | 8,666.22          | 8,521.68          | 8,830.86          | 34,401.74         |
| 988                            | 1,938.94          | 2,020.42          | 2,031.06          | 2,058.08          | 8,048.51          |
| 989                            | 2,478.99          | 2,502.08          | 2,319.89          | 2,574.02          | 9,874.96          |
| 990                            | 1,062.61          | 1,077.38          | 1,036.97          | 1,072.33          | 4,249.29          |
| 991                            | 1,087.88          | 1,070.81          | 995.24            | 1,227.54          | 4,381.48          |
| 992                            | 5,778.51          | 6,101.36          | 6,000.73          | 6,466.80          | 24,347.40         |
| 993                            | 5,548.94          | 5,754.00          | 5,570.85          | 5,813.47          | 22,687.26         |
| 994                            | 210.02            | 204.56            | 205.50            | 212.21            | 832.29            |
| <b>WA - WASHINGTON - Total</b> | <b>112,692.56</b> | <b>116,489.87</b> | <b>114,444.53</b> | <b>118,917.24</b> | <b>462,544.20</b> |

**STATE: WI - WISCONSIN**

| REGISTRANT ZIP CODE 3 | 1ST QUARTER | 2ND QUARTER | 3RD QUARTER | 4TH QUARTER | TOTAL GRAMS |
|-----------------------|-------------|-------------|-------------|-------------|-------------|
| 530                   | 14,383.45   | 14,186.24   | 14,436.96   | 14,555.58   | 57,562.24   |

|                               |                   |                   |                   |                   |                   |
|-------------------------------|-------------------|-------------------|-------------------|-------------------|-------------------|
| 531                           | 14,969.87         | 14,735.39         | 14,807.09         | 15,056.24         | 59,568.60         |
| 532                           | 13,404.71         | 13,417.42         | 13,296.34         | 13,684.14         | 53,802.62         |
| 534                           | 4,122.56          | 4,177.71          | 4,262.56          | 4,163.45          | 16,726.28         |
| 535                           | 10,269.50         | 9,934.00          | 10,036.86         | 10,051.42         | 40,291.78         |
| 537                           | 8,081.00          | 8,228.30          | 8,106.74          | 8,074.83          | 32,490.87         |
| 538                           | 1,044.66          | 1,083.74          | 1,048.65          | 1,120.56          | 4,297.62          |
| 539                           | 3,520.95          | 3,563.64          | 3,517.24          | 3,554.22          | 14,156.05         |
| 540                           | 2,527.78          | 2,483.90          | 2,497.26          | 2,498.59          | 10,007.53         |
| 541                           | 6,892.36          | 6,677.43          | 6,878.48          | 6,834.03          | 27,282.30         |
| 542                           | 2,700.56          | 2,679.03          | 2,697.64          | 2,699.32          | 10,776.55         |
| 543                           | 8,080.09          | 8,217.37          | 8,195.64          | 8,256.34          | 32,749.44         |
| 544                           | 8,097.84          | 8,046.11          | 8,093.88          | 8,154.70          | 32,392.52         |
| 545                           | 2,180.39          | 2,135.18          | 2,301.71          | 2,197.08          | 8,814.36          |
| 546                           | 4,304.07          | 4,299.77          | 4,198.17          | 4,229.95          | 17,031.95         |
| 547                           | 4,343.39          | 4,316.22          | 4,021.07          | 4,215.25          | 16,895.93         |
| 548                           | 2,294.28          | 2,259.08          | 2,238.93          | 2,372.35          | 9,164.63          |
| 549                           | 15,248.41         | 14,930.21         | 15,248.86         | 15,207.62         | 60,635.11         |
| <b>WI - WISCONSIN - Total</b> | <b>126,465.87</b> | <b>125,370.76</b> | <b>125,884.09</b> | <b>126,925.65</b> | <b>504,646.38</b> |

**STATE: WV - WEST VIRGINIA**

| REGISTRANT ZIP CODE 3 | 1ST QUARTER | 2ND QUARTER | 3RD QUARTER | 4TH QUARTER | TOTAL GRAMS |
|-----------------------|-------------|-------------|-------------|-------------|-------------|
| 247                   | 331.03      | 306.94      | 297.02      | 313.30      | 1,248.29    |
| 248                   | 198.51      | 181.09      | 207.72      | 227.49      | 814.80      |
| 249                   | 421.90      | 388.11      | 408.14      | 402.95      | 1,621.11    |
| 250                   | 860.09      | 904.31      | 861.84      | 906.28      | 3,532.52    |
| 251                   | 674.29      | 728.95      | 751.33      | 774.93      | 2,929.50    |
| 252                   | 456.02      | 417.69      | 417.27      | 442.53      | 1,733.52    |
| 253                   | 3,525.09    | 3,356.22    | 3,382.85    | 3,227.71    | 13,491.87   |
| 254                   | 2,650.34    | 2,763.13    | 2,758.50    | 2,759.61    | 10,931.57   |
| 255                   | 2,312.55    | 2,434.87    | 2,343.32    | 2,322.28    | 9,413.03    |
| 256                   | 288.64      | 237.56      | 230.30      | 298.27      | 1,054.76    |
| 257                   | 1,771.33    | 1,744.85    | 1,814.95    | 1,910.19    | 7,241.32    |
| 258                   | 1,199.14    | 1,107.35    | 1,126.78    | 1,059.17    | 4,492.45    |
| 259                   | 244.09      | 235.57      | 251.52      | 228.83      | 960.01      |
| 260                   | 1,412.62    | 1,483.29    | 1,412.52    | 1,473.07    | 5,781.50    |
| 261                   | 2,271.47    | 2,350.78    | 2,243.85    | 2,295.55    | 9,161.66    |
| 262                   | 345.17      | 367.14      | 343.84      | 344.27      | 1,400.42    |
| 263                   | 970.15      | 1,051.01    | 1,026.82    | 1,017.22    | 4,065.20    |
| 264                   | 257.24      | 234.05      | 234.86      | 237.16      | 963.32      |
| 265                   | 2,682.33    | 2,632.71    | 2,759.76    | 2,738.41    | 10,813.20   |
| 266                   | 124.18      | 131.53      | 139.45      | 154.76      | 549.93      |

|                                   |                  |                  |                  |                  |                  |
|-----------------------------------|------------------|------------------|------------------|------------------|------------------|
| 267                               | 298.47           | 307.26           | 326.99           | 320.96           | <b>1,253.69</b>  |
| 268                               | 228.74           | 239.23           | 253.78           | 253.22           | <b>974.97</b>    |
| <b>WV - WEST VIRGINIA - Total</b> | <b>23,523.40</b> | <b>23,603.65</b> | <b>23,593.42</b> | <b>23,708.16</b> | <b>94,428.63</b> |

**STATE: WY - WYOMING**

| REGISTRANT ZIP CODE 3       | 1ST QUARTER     | 2ND QUARTER     | 3RD QUARTER     | 4TH QUARTER     | TOTAL GRAMS      |
|-----------------------------|-----------------|-----------------|-----------------|-----------------|------------------|
| 820                         | 1,438.32        | 1,553.17        | 1,430.90        | 1,503.80        | <b>5,926.20</b>  |
| 822                         | 91.19           | 75.16           | 73.46           | 73.92           | <b>313.73</b>    |
| 823                         | 120.24          | 112.87          | 129.20          | 120.49          | <b>482.80</b>    |
| 824                         | 817.03          | 855.02          | 919.18          | 841.58          | <b>3,432.81</b>  |
| 825                         | 342.78          | 322.40          | 286.65          | 358.84          | <b>1,310.66</b>  |
| 826                         | 1,033.02        | 991.88          | 1,053.55        | 1,088.07        | <b>4,166.51</b>  |
| 827                         | 535.39          | 499.85          | 532.30          | 539.37          | <b>2,106.91</b>  |
| 828                         | 612.10          | 548.61          | 567.98          | 531.89          | <b>2,260.58</b>  |
| 829                         | 1,203.95        | 1,166.23        | 1,204.10        | 1,235.09        | <b>4,809.37</b>  |
| 830                         | 541.95          | 530.60          | 593.86          | 623.85          | <b>2,290.26</b>  |
| 831                         | 134.50          | 120.94          | 139.78          | 127.65          | <b>522.87</b>    |
| <b>WY - WYOMING - Total</b> | <b>6,870.46</b> | <b>6,776.74</b> | <b>6,930.96</b> | <b>7,044.55</b> | <b>27,622.71</b> |

**DRUG: 1105 - METHAMPHETAMINE****STATE: AK - ALASKA**

| REGISTRANT ZIP CODE 3      | 1ST QUARTER | 2ND QUARTER | 3RD QUARTER | 4TH QUARTER | TOTAL GRAMS |
|----------------------------|-------------|-------------|-------------|-------------|-------------|
| 995                        | 0.40        | 0           | 0           | 0           | <b>0.40</b> |
| 997                        | 1.21        | 0.40        | 2.41        | 0           | <b>4.02</b> |
| 998                        | 0.40        | 1.61        | 1.21        | 0           | <b>3.21</b> |
| <b>AK - ALASKA - Total</b> | <b>2.01</b> | <b>2.01</b> | <b>3.62</b> | <b>0.00</b> | <b>7.63</b> |

**STATE: AL - ALABAMA**

| REGISTRANT ZIP CODE 3 | 1ST QUARTER | 2ND QUARTER | 3RD QUARTER | 4TH QUARTER | TOTAL GRAMS  |
|-----------------------|-------------|-------------|-------------|-------------|--------------|
| 350                   | 3.62        | 2.41        | 2.81        | 3.21        | <b>12.05</b> |
| 351                   | 3.62        | 3.21        | 2.41        | 3.62        | <b>12.86</b> |
| 352                   | 3.62        | 6.03        | 4.82        | 5.62        | <b>20.09</b> |
| 354                   | 2.01        | 2.01        | 0.80        | 1.61        | <b>6.43</b>  |
| 355                   | 3.21        | 3.21        | 5.63        | 4.42        | <b>16.47</b> |
| 356                   | 5.62        | 6.43        | 6.83        | 7.23        | <b>26.11</b> |
| 357                   | 1.21        | 1.61        | 2.01        | 2.41        | <b>7.23</b>  |
| 359                   | 0.40        | 0.80        | 0.40        | 0           | <b>1.61</b>  |
| 360                   | 0           | 0           | 0           | 0.40        | <b>0.40</b>  |
| 361                   | 2.81        | 0           | 0           | 0           | <b>2.81</b>  |
| 362                   | 1.61        | 4.02        | 4.42        | 4.42        | <b>14.47</b> |
| 363                   | 0           | 0.80        | 0           | 0.40        | <b>1.21</b>  |
| 365                   | 0           | 0.80        | 1.61        | 0.40        | <b>2.81</b>  |
| 366                   | 2.41        | 2.01        | 2.81        | 4.02        | <b>11.25</b> |

|                             |              |              |              |              |               |
|-----------------------------|--------------|--------------|--------------|--------------|---------------|
| <b>AL - ALABAMA - Total</b> | <b>30.14</b> | <b>33.35</b> | <b>34.55</b> | <b>37.77</b> | <b>135.81</b> |
|-----------------------------|--------------|--------------|--------------|--------------|---------------|

**STATE: AR - ARKANSAS**

| REGISTRANT ZIP CODE 3        | 1ST QUARTER | 2ND QUARTER | 3RD QUARTER | 4TH QUARTER | TOTAL GRAMS  |
|------------------------------|-------------|-------------|-------------|-------------|--------------|
| 717                          | 0           | 0           | 0           | 2.41        | 2.41         |
| 719                          | 0           | 0.80        | 0           | 0           | 0.80         |
| 720                          | 1.21        | 0.40        | 1.61        | 2.01        | 5.22         |
| 721                          | 0.80        | 0.80        | 0.80        | 0.80        | 3.21         |
| 722                          | 1.21        | 0.40        | 0           | 2.41        | 4.02         |
| 723                          | 0           | 0           | 0           | 1.21        | 1.21         |
| 724                          | 0           | 0           | 0           | 0.80        | 0.80         |
| 727                          | 4.02        | 2.41        | 0           | 0           | 6.43         |
| 729                          | 1.61        | 2.41        | 0           | 0           | 4.02         |
| <b>AR - ARKANSAS - Total</b> | <b>8.84</b> | <b>7.23</b> | <b>2.41</b> | <b>9.64</b> | <b>28.13</b> |

**STATE: AZ - ARIZONA**

| REGISTRANT ZIP CODE 3       | 1ST QUARTER  | 2ND QUARTER  | 3RD QUARTER  | 4TH QUARTER  | TOTAL GRAMS   |
|-----------------------------|--------------|--------------|--------------|--------------|---------------|
| 850                         | 2.41         | 0            | 1.21         | 2.01         | 5.63          |
| 852                         | 29.33        | 33.35        | 58.67        | 33.75        | 155.09        |
| 853                         | 1.21         | 4.02         | 2.81         | 1.61         | 9.64          |
| 855                         | 1.61         | 2.41         | 1.21         | 1.61         | 6.83          |
| 856                         | 1.21         | 0            | 0            | 0            | 1.21          |
| 857                         | 0.80         | 0.40         | 0            | 0            | 1.21          |
| 863                         | 0.40         | 0            | 0            | 0            | 0.40          |
| <b>AZ - ARIZONA - Total</b> | <b>36.97</b> | <b>40.18</b> | <b>63.89</b> | <b>38.97</b> | <b>180.01</b> |

**STATE: CA - CALIFORNIA**

| REGISTRANT ZIP CODE 3 | 1ST QUARTER | 2ND QUARTER | 3RD QUARTER | 4TH QUARTER | TOTAL GRAMS |
|-----------------------|-------------|-------------|-------------|-------------|-------------|
| 900                   | 27.32       | 27.32       | 29.33       | 24.10       | 108.07      |
| 902                   | 4.42        | 1.61        | 1.61        | 1.21        | 8.84        |
| 905                   | 0           | 0.40        | 0           | 0           | 0.40        |
| 906                   | 0.40        | 0           | 0.80        | 0           | 1.21        |
| 907                   | 0           | 0.40        | 0           | 0           | 0.40        |
| 908                   | 1.21        | 1.61        | 3.21        | 1.61        | 7.63        |
| 910                   | 2.81        | 7.23        | 5.22        | 4.82        | 20.09       |
| 911                   | 1.61        | 2.81        | 2.41        | 0.40        | 7.23        |
| 912                   | 3.62        | 5.62        | 5.62        | 6.83        | 21.70       |
| 913                   | 20.89       | 26.92       | 18.48       | 17.28       | 83.57       |
| 914                   | 4.02        | 3.62        | 3.21        | 3.62        | 14.47       |
| 917                   | 17.68       | 21.69       | 24.91       | 25.31       | 89.58       |
| 918                   | 0           | 0           | 0.40        | 0.40        | 0.80        |
| 919                   | 5.62        | 2.01        | 4.02        | 2.81        | 14.46       |
| 920                   | 38.97       | 34.95       | 36.56       | 41.38       | 151.85      |

|                                |               |               |               |               |                 |
|--------------------------------|---------------|---------------|---------------|---------------|-----------------|
| 921                            | 12.46         | 10.85         | 10.85         | 6.83          | 40.99           |
| 922                            | 2.81          | 1.21          | 0.40          | 2.41          | 6.83            |
| 923                            | 5.22          | 7.23          | 2.81          | 4.02          | 19.28           |
| 925                            | 6.83          | 4.82          | 7.63          | 8.03          | 27.32           |
| 926                            | 18.48         | 20.09         | 19.29         | 14.87         | 72.72           |
| 927                            | 1.61          | 9.24          | 3.21          | 7.23          | 21.29           |
| 928                            | 10.45         | 12.45         | 9.24          | 14.87         | 47.01           |
| 930                            | 2.41          | 2.01          | 2.81          | 2.81          | 10.05           |
| 931                            | 2.01          | 2.01          | 3.62          | 2.01          | 9.64            |
| 934                            | 1.21          | 0             | 1.21          | 0.80          | 3.21            |
| 935                            | 0.40          | 0.80          | 2.41          | 1.61          | 5.22            |
| 937                            | 1.61          | 1.61          | 0.80          | 0             | 4.02            |
| 939                            | 1.61          | 2.81          | 1.21          | 0             | 5.63            |
| 940                            | 10.85         | 9.64          | 8.44          | 5.22          | 34.15           |
| 941                            | 13.66         | 5.63          | 7.23          | 8.04          | 34.55           |
| 943                            | 0.40          | 0.40          | 0.80          | 0             | 1.61            |
| 944                            | 0             | 0.40          | 0             | 0             | 0.40            |
| 945                            | 4.82          | 3.62          | 6.03          | 6.03          | 20.49           |
| 946                            | 3.62          | 2.01          | 0             | 0             | 5.63            |
| 947                            | 0             | 1.21          | 0             | 0             | 1.21            |
| 948                            | 0.40          | 0             | 0             | 0             | 0.40            |
| 949                            | 0.80          | 2.41          | 4.42          | 2.41          | 10.04           |
| 950                            | 7.63          | 6.83          | 10.85         | 6.83          | 32.14           |
| 951                            | 12.46         | 12.86         | 14.06         | 17.68         | 57.05           |
| 953                            | 5.62          | 3.62          | 3.62          | 2.41          | 15.27           |
| 954                            | 0.80          | 0.40          | 0             | 0             | 1.21            |
| 955                            | 1.21          | 0.80          | 0.80          | 1.21          | 4.02            |
| 956                            | 4.02          | 2.41          | 5.22          | 4.42          | 16.07           |
| 957                            | 2.01          | 0.40          | 0.80          | 0.40          | 3.62            |
| 958                            | 4.02          | 4.42          | 5.22          | 3.21          | 16.87           |
| 959                            | 4.42          | 4.82          | 4.42          | 6.03          | 19.69           |
| 960                            | 0             | 0.80          | 0             | 1.21          | 2.01            |
| <b>CA - CALIFORNIA - Total</b> | <b>272.41</b> | <b>274.01</b> | <b>273.20</b> | <b>260.34</b> | <b>1,079.95</b> |

**STATE: CO - COLORADO**

| REGISTRANT ZIP CODE 3 | 1ST QUARTER | 2ND QUARTER | 3RD QUARTER | 4TH QUARTER | TOTAL GRAMS |
|-----------------------|-------------|-------------|-------------|-------------|-------------|
| 800                   | 11.65       | 13.26       | 14.47       | 14.06       | 53.44       |
| 801                   | 16.47       | 19.69       | 19.69       | 11.65       | 67.50       |
| 802                   | 14.06       | 16.07       | 21.70       | 20.49       | 72.33       |
| 803                   | 1.21        | 1.21        | 0.40        | 2.41        | 5.22        |
| 804                   | 3.21        | 0.80        | 2.01        | 4.42        | 10.45       |

|                              |              |              |              |              |               |
|------------------------------|--------------|--------------|--------------|--------------|---------------|
| 805                          | 2.41         | 2.81         | 0.40         | 2.41         | 8.04          |
| 806                          | 1.21         | 0            | 0.80         | 0            | 2.01          |
| 809                          | 2.41         | 0.80         | 0.80         | 0.40         | 4.42          |
| 810                          | 0            | 0            | 1.21         | 0.40         | 1.61          |
| 811                          | 0            | 1.21         | 0            | 0            | 1.21          |
| 812                          | 0.80         | 2.41         | 1.21         | 0            | 4.42          |
| 813                          | 1.21         | 0            | 0            | 0            | 1.21          |
| 816                          | 2.01         | 0.80         | 0.80         | 0            | 3.62          |
| <b>CO - COLORADO - Total</b> | <b>56.66</b> | <b>59.07</b> | <b>63.49</b> | <b>56.25</b> | <b>235.47</b> |

**STATE: CT - CONNECTICUT**

| REGISTRANT ZIP CODE 3           | 1ST QUARTER  | 2ND QUARTER  | 3RD QUARTER  | 4TH QUARTER  | TOTAL GRAMS  |
|---------------------------------|--------------|--------------|--------------|--------------|--------------|
| 060                             | 7.23         | 6.03         | 8.04         | 9.64         | 30.94        |
| 061                             | 3.62         | 1.61         | 1.61         | 0.80         | 7.64         |
| 064                             | 0            | 1.21         | 0            | 0.40         | 1.61         |
| 065                             | 4.42         | 6.03         | 2.81         | 3.62         | 16.88        |
| 066                             | 0.80         | 0.40         | 0.40         | 0.80         | 2.41         |
| 067                             | 1.61         | 2.41         | 1.61         | 0.80         | 6.43         |
| 068                             | 5.63         | 5.63         | 4.42         | 8.44         | 24.11        |
| 069                             | 1.21         | 1.61         | 1.61         | 1.61         | 6.03         |
| <b>CT - CONNECTICUT - Total</b> | <b>24.51</b> | <b>24.91</b> | <b>20.49</b> | <b>26.12</b> | <b>96.03</b> |

**STATE: DC - DISTRICT OF COLUMBIA**

| REGISTRANT ZIP CODE 3              | 1ST QUARTER | 2ND QUARTER  | 3RD QUARTER | 4TH QUARTER | TOTAL GRAMS  |
|------------------------------------|-------------|--------------|-------------|-------------|--------------|
| 200                                | 5.22        | 11.65        | 7.23        | 5.62        | 29.73        |
| <b>DC - DISTRICT OF COLUMBIA -</b> | <b>5.22</b> | <b>11.65</b> | <b>7.23</b> | <b>5.62</b> | <b>29.73</b> |

**STATE: DE - DELAWARE**

| REGISTRANT ZIP CODE 3        | 1ST QUARTER | 2ND QUARTER | 3RD QUARTER | 4TH QUARTER | TOTAL GRAMS  |
|------------------------------|-------------|-------------|-------------|-------------|--------------|
| 197                          | 0.40        | 0.80        | 0.80        | 0.80        | 2.81         |
| 198                          | 1.21        | 3.21        | 2.41        | 1.21        | 8.04         |
| 199                          | 1.61        | 1.61        | 1.21        | 2.41        | 6.83         |
| <b>DE - DELAWARE - Total</b> | <b>3.21</b> | <b>5.63</b> | <b>4.42</b> | <b>4.42</b> | <b>17.68</b> |

**STATE: FL - FLORIDA**

| REGISTRANT ZIP CODE 3 | 1ST QUARTER | 2ND QUARTER | 3RD QUARTER | 4TH QUARTER | TOTAL GRAMS |
|-----------------------|-------------|-------------|-------------|-------------|-------------|
| 320                   | 1.61        | 1.61        | 2.41        | 2.41        | 8.04        |
| 321                   | 3.21        | 1.21        | 1.61        | 2.01        | 8.03        |
| 322                   | 1.61        | 2.81        | 3.21        | 2.41        | 10.05       |
| 324                   | 1.61        | 1.21        | 1.21        | 0.80        | 4.82        |
| 325                   | 2.81        | 3.62        | 3.62        | 4.82        | 14.87       |
| 326                   | 4.02        | 3.21        | 4.42        | 3.62        | 15.27       |
| 327                   | 8.84        | 1.21        | 9.64        | 3.62        | 23.30       |
| 328                   | 2.01        | 4.82        | 3.62        | 2.81        | 13.26       |

|                             |              |              |              |              |               |
|-----------------------------|--------------|--------------|--------------|--------------|---------------|
| 329                         | 3.62         | 4.42         | 3.62         | 4.82         | 16.48         |
| 330                         | 0.40         | 0.80         | 2.81         | 0.80         | 4.82          |
| 331                         | 4.02         | 2.81         | 2.01         | 4.42         | 13.26         |
| 333                         | 2.41         | 0            | 0.80         | 0.80         | 4.02          |
| 334                         | 2.41         | 1.21         | 0.80         | 2.01         | 6.43          |
| 335                         | 0.40         | 0            | 0.80         | 0.40         | 1.61          |
| 336                         | 0            | 0.80         | 0.40         | 0            | 1.21          |
| 337                         | 2.01         | 1.61         | 1.61         | 1.61         | 6.83          |
| 338                         | 1.61         | 2.81         | 1.61         | 0.40         | 6.43          |
| 339                         | 4.02         | 3.62         | 3.21         | 3.62         | 14.47         |
| 341                         | 0.40         | 1.61         | 0            | 0            | 2.01          |
| 342                         | 1.61         | 4.82         | 3.21         | 3.62         | 13.26         |
| 346                         | 1.21         | 2.81         | 2.01         | 2.01         | 8.04          |
| <b>FL - FLORIDA - Total</b> | <b>49.82</b> | <b>47.01</b> | <b>52.64</b> | <b>47.01</b> | <b>196.48</b> |

**STATE: GA - GEORGIA**

| REGISTRANT ZIP CODE 3       | 1ST QUARTER  | 2ND QUARTER  | 3RD QUARTER  | 4TH QUARTER  | TOTAL GRAMS  |
|-----------------------------|--------------|--------------|--------------|--------------|--------------|
| 300                         | 4.42         | 3.62         | 7.23         | 5.63         | 20.90        |
| 301                         | 4.42         | 4.82         | 4.82         | 6.03         | 20.09        |
| 302                         | 0.40         | 0            | 0            | 2.81         | 3.21         |
| 303                         | 4.02         | 3.62         | 4.42         | 3.62         | 15.67        |
| 304                         | 2.81         | 0.80         | 1.21         | 1.61         | 6.43         |
| 306                         | 0            | 0            | 0            | 0.40         | 0.40         |
| 310                         | 3.21         | 2.01         | 2.41         | 2.41         | 10.05        |
| 313                         | 0.80         | 0.40         | 0.80         | 0            | 2.01         |
| 315                         | 3.62         | 1.61         | 1.61         | 2.81         | 9.64         |
| 316                         | 0.40         | 0            | 0            | 0            | 0.40         |
| <b>GA - GEORGIA - Total</b> | <b>24.11</b> | <b>16.88</b> | <b>22.50</b> | <b>25.31</b> | <b>88.80</b> |

**STATE: HI - HAWAII**

| REGISTRANT ZIP CODE 3      | 1ST QUARTER | 2ND QUARTER | 3RD QUARTER | 4TH QUARTER | TOTAL GRAMS  |
|----------------------------|-------------|-------------|-------------|-------------|--------------|
| 967                        | 2.01        | 2.01        | 1.61        | 2.81        | 8.44         |
| 968                        | 3.21        | 2.81        | 3.21        | 4.42        | 13.66        |
| <b>HI - HAWAII - Total</b> | <b>5.22</b> | <b>4.82</b> | <b>4.82</b> | <b>7.23</b> | <b>22.10</b> |

**STATE: IA - IOWA**

| REGISTRANT ZIP CODE 3 | 1ST QUARTER | 2ND QUARTER | 3RD QUARTER | 4TH QUARTER | TOTAL GRAMS |
|-----------------------|-------------|-------------|-------------|-------------|-------------|
| 500                   | 0.40        | 0           | 0           | 0.40        | 0.80        |
| 501                   | 0.40        | 0           | 0           | 0           | 0.40        |
| 502                   | 3.62        | 8.04        | 7.23        | 7.63        | 26.52       |
| 503                   | 4.42        | 2.01        | 4.42        | 2.01        | 12.86       |
| 504                   | 2.41        | 2.41        | 4.02        | 1.21        | 10.05       |
| 505                   | 0.80        | 0.80        | 0           | 1.21        | 2.81        |



|                          |              |              |              |              |              |
|--------------------------|--------------|--------------|--------------|--------------|--------------|
| 506                      | 0.40         | 0            | 0            | 0            | 0.40         |
| 515                      | 2.81         | 2.01         | 2.41         | 0.80         | 8.04         |
| 516                      | 0.40         | 0            | 0.80         | 0            | 1.21         |
| 522                      | 0.40         | 0            | 0            | 0            | 0.40         |
| 528                      | 1.21         | 2.41         | 2.41         | 1.21         | 7.23         |
| <b>IA - IOWA - Total</b> | <b>17.28</b> | <b>17.68</b> | <b>21.30</b> | <b>14.46</b> | <b>70.72</b> |

**STATE: ID - IDAHO**

| REGISTRANT ZIP CODE 3     | 1ST QUARTER  | 2ND QUARTER  | 3RD QUARTER  | 4TH QUARTER  | TOTAL GRAMS  |
|---------------------------|--------------|--------------|--------------|--------------|--------------|
| 834                       | 2.81         | 0.80         | 1.21         | 1.21         | 6.03         |
| 836                       | 5.63         | 5.22         | 6.43         | 6.43         | 23.71        |
| 837                       | 2.01         | 0.80         | 0.80         | 1.61         | 5.22         |
| 838                       | 5.22         | 5.22         | 5.62         | 4.42         | 20.49        |
| <b>ID - IDAHO - Total</b> | <b>15.67</b> | <b>12.05</b> | <b>14.06</b> | <b>13.66</b> | <b>55.44</b> |

**STATE: IL - ILLINOIS**

| REGISTRANT ZIP CODE 3        | 1ST QUARTER  | 2ND QUARTER  | 3RD QUARTER  | 4TH QUARTER  | TOTAL GRAMS   |
|------------------------------|--------------|--------------|--------------|--------------|---------------|
| 600                          | 16.88        | 14.87        | 14.87        | 12.86        | 59.47         |
| 601                          | 5.22         | 6.83         | 9.24         | 4.02         | 25.31         |
| 602                          | 0            | 0            | 0            | 3.21         | 3.21          |
| 603                          | 0.80         | 2.01         | 1.21         | 1.21         | 5.22          |
| 604                          | 2.41         | 2.81         | 1.21         | 5.63         | 12.06         |
| 605                          | 15.27        | 13.66        | 13.66        | 12.86        | 55.45         |
| 606                          | 12.86        | 6.43         | 8.84         | 6.83         | 34.96         |
| 607                          | 0.40         | 1.21         | 0.80         | 0            | 2.41          |
| 611                          | 0            | 0.40         | 0            | 0            | 0.40          |
| 615                          | 1.21         | 0            | 0            | 0            | 1.21          |
| 616                          | 0            | 0            | 0.40         | 0            | 0.40          |
| 617                          | 0            | 1.21         | 0            | 0            | 1.21          |
| 622                          | 0            | 0            | 0.40         | 0            | 0.40          |
| 627                          | 0.40         | 2.41         | 1.21         | 2.01         | 6.03          |
| <b>IL - ILLINOIS - Total</b> | <b>55.45</b> | <b>51.84</b> | <b>51.83</b> | <b>48.62</b> | <b>207.74</b> |

**STATE: IN - INDIANA**

| REGISTRANT ZIP CODE 3 | 1ST QUARTER | 2ND QUARTER | 3RD QUARTER | 4TH QUARTER | TOTAL GRAMS |
|-----------------------|-------------|-------------|-------------|-------------|-------------|
| 460                   | 9.64        | 6.43        | 6.43        | 5.63        | 28.13       |
| 461                   | 0           | 2.01        | 0.40        | 0           | 2.41        |
| 462                   | 0           | 2.81        | 0.80        | 1.61        | 5.22        |
| 463                   | 1.61        | 1.61        | 2.01        | 2.41        | 7.63        |
| 469                   | 11.25       | 10.85       | 10.45       | 10.85       | 43.40       |
| 472                   | 0           | 0.40        | 0           | 0           | 0.40        |
| 473                   | 0           | 0           | 0.40        | 0           | 0.40        |
| 474                   | 2.41        | 0.80        | 2.01        | 2.41        | 7.64        |

|                             |              |              |              |              |               |
|-----------------------------|--------------|--------------|--------------|--------------|---------------|
| 477                         | 0.80         | 1.21         | 1.21         | 1.21         | 4.42          |
| 479                         | 0            | 1.61         | 0.80         | 0.40         | 2.81          |
| <b>IN - INDIANA - Total</b> | <b>25.72</b> | <b>27.73</b> | <b>24.51</b> | <b>24.51</b> | <b>102.47</b> |

**STATE: KS - KANSAS**

| REGISTRANT ZIP CODE 3      | 1ST QUARTER  | 2ND QUARTER  | 3RD QUARTER  | 4TH QUARTER  | TOTAL GRAMS  |
|----------------------------|--------------|--------------|--------------|--------------|--------------|
| 660                        | 4.42         | 5.22         | 6.43         | 4.02         | 20.09        |
| 662                        | 0            | 0            | 0            | 1.61         | 1.61         |
| 665                        | 1.61         | 1.21         | 1.61         | 1.61         | 6.03         |
| 670                        | 0            | 0            | 0.80         | 1.21         | 2.01         |
| 672                        | 8.44         | 9.24         | 6.83         | 7.23         | 31.74        |
| <b>KS - KANSAS - Total</b> | <b>14.47</b> | <b>15.67</b> | <b>15.67</b> | <b>15.67</b> | <b>61.48</b> |

**STATE: KY - KENTUCKY**

| REGISTRANT ZIP CODE 3        | 1ST QUARTER  | 2ND QUARTER  | 3RD QUARTER  | 4TH QUARTER  | TOTAL GRAMS  |
|------------------------------|--------------|--------------|--------------|--------------|--------------|
| 402                          | 0            | 0            | 0            | 0.80         | 0.80         |
| 403                          | 2.01         | 2.41         | 4.02         | 1.61         | 10.05        |
| 405                          | 4.02         | 6.43         | 6.83         | 6.03         | 23.30        |
| 406                          | 0.80         | 0.40         | 0            | 0            | 1.21         |
| 408                          | 2.41         | 1.61         | 2.01         | 1.61         | 7.63         |
| 410                          | 0.80         | 0.40         | 0.40         | 0            | 1.61         |
| 416                          | 0            | 0.40         | 0.40         | 0            | 0.80         |
| 425                          | 0.80         | 0            | 0.40         | 0.40         | 1.61         |
| <b>KY - KENTUCKY - Total</b> | <b>10.85</b> | <b>11.65</b> | <b>14.06</b> | <b>10.45</b> | <b>47.01</b> |

**STATE: LA - LOUISIANA**

| REGISTRANT ZIP CODE 3         | 1ST QUARTER  | 2ND QUARTER  | 3RD QUARTER  | 4TH QUARTER  | TOTAL GRAMS  |
|-------------------------------|--------------|--------------|--------------|--------------|--------------|
| 701                           | 0            | 0            | 0.40         | 0            | 0.40         |
| 703                           | 3.21         | 2.01         | 2.01         | 0            | 7.23         |
| 704                           | 2.41         | 1.21         | 0.80         | 0            | 4.42         |
| 705                           | 0            | 0            | 1.61         | 1.61         | 3.21         |
| 706                           | 0.80         | 2.01         | 1.61         | 1.61         | 6.03         |
| 707                           | 1.21         | 0.40         | 0            | 0.40         | 2.01         |
| 708                           | 2.41         | 4.42         | 3.62         | 5.63         | 16.07        |
| 711                           | 2.81         | 3.21         | 3.21         | 3.21         | 12.46        |
| 712                           | 0            | 0            | 1.21         | 0            | 1.21         |
| 713                           | 2.81         | 1.61         | 1.21         | 1.21         | 6.83         |
| 714                           | 0            | 0.40         | 0            | 0            | 0.40         |
| <b>LA - LOUISIANA - Total</b> | <b>15.67</b> | <b>15.27</b> | <b>15.67</b> | <b>13.66</b> | <b>60.27</b> |

**STATE: MA - MASSACHUSETTS**

| REGISTRANT ZIP CODE 3 | 1ST QUARTER | 2ND QUARTER | 3RD QUARTER | 4TH QUARTER | TOTAL GRAMS |
|-----------------------|-------------|-------------|-------------|-------------|-------------|
| 010                   | 15.27       | 8.84        | 3.21        | 2.81        | 30.14       |
| 012                   | 1.21        | 0.40        | 0           | 0           | 1.61        |

|                                   |              |              |              |              |               |
|-----------------------------------|--------------|--------------|--------------|--------------|---------------|
| 013                               | 0            | 0            | 0            | 2.41         | 2.41          |
| 014                               | 0.80         | 2.41         | 1.61         | 2.01         | 6.83          |
| 017                               | 3.21         | 3.21         | 3.21         | 4.02         | 13.66         |
| 018                               | 4.02         | 4.82         | 3.62         | 3.62         | 16.07         |
| 019                               | 6.43         | 8.44         | 6.43         | 2.41         | 23.71         |
| 020                               | 0.80         | 0            | 0            | 0            | 0.80          |
| 021                               | 3.21         | 4.82         | 5.63         | 4.02         | 17.68         |
| 023                               | 0.80         | 0.40         | 0.40         | 0            | 1.61          |
| 024                               | 4.42         | 2.01         | 6.43         | 4.42         | 17.28         |
| 026                               | 0            | 0            | 0.40         | 0            | 0.40          |
| 027                               | 2.81         | 2.41         | 0.80         | 1.21         | 7.23          |
| <b>MA - MASSACHUSETTS - Total</b> | <b>43.00</b> | <b>37.77</b> | <b>31.74</b> | <b>26.92</b> | <b>139.43</b> |

**STATE: MD - MARYLAND**

| REGISTRANT ZIP CODE 3        | 1ST QUARTER  | 2ND QUARTER  | 3RD QUARTER  | 4TH QUARTER  | TOTAL GRAMS   |
|------------------------------|--------------|--------------|--------------|--------------|---------------|
| 206                          | 0            | 0            | 0.80         | 2.41         | 3.21          |
| 207                          | 0            | 0.80         | 0.80         | 0.40         | 2.01          |
| 208                          | 6.43         | 8.44         | 6.43         | 10.04        | 31.33         |
| 210                          | 6.43         | 8.03         | 8.44         | 8.84         | 31.74         |
| 211                          | 9.24         | 7.64         | 12.86        | 11.65        | 41.39         |
| 212                          | 11.25        | 7.23         | 8.04         | 10.85        | 37.37         |
| 214                          | 1.61         | 0.40         | 0.40         | 0.40         | 2.81          |
| 216                          | 0.40         | 0            | 0            | 0            | 0.40          |
| 217                          | 1.61         | 0.80         | 0.80         | 0.80         | 4.02          |
| <b>MD - MARYLAND - Total</b> | <b>36.97</b> | <b>33.35</b> | <b>38.57</b> | <b>45.40</b> | <b>154.29</b> |

**STATE: ME - MAINE**

| REGISTRANT ZIP CODE 3     | 1ST QUARTER  | 2ND QUARTER  | 3RD QUARTER  | 4TH QUARTER  | TOTAL GRAMS  |
|---------------------------|--------------|--------------|--------------|--------------|--------------|
| 040                       | 1.61         | 2.01         | 2.81         | 3.62         | 10.05        |
| 041                       | 3.21         | 1.21         | 2.01         | 0            | 6.43         |
| 042                       | 4.82         | 5.22         | 8.04         | 6.03         | 24.11        |
| 044                       | 0            | 1.21         | 0            | 0            | 1.21         |
| 045                       | 0            | 0            | 6.83         | 2.01         | 8.84         |
| 048                       | 0.80         | 0.80         | 0.40         | 0.40         | 2.41         |
| <b>ME - MAINE - Total</b> | <b>10.45</b> | <b>10.45</b> | <b>20.09</b> | <b>12.05</b> | <b>53.04</b> |

**STATE: MI - MICHIGAN**

| REGISTRANT ZIP CODE 3 | 1ST QUARTER | 2ND QUARTER | 3RD QUARTER | 4TH QUARTER | TOTAL GRAMS |
|-----------------------|-------------|-------------|-------------|-------------|-------------|
| 480                   | 2.41        | 2.01        | 2.81        | 5.22        | 12.45       |
| 481                   | 2.01        | 2.01        | 3.62        | 1.61        | 9.24        |
| 482                   | 0           | 0           | 0.80        | 0           | 0.80        |
| 483                   | 5.22        | 4.42        | 3.21        | 1.61        | 14.47       |
| 487                   | 4.82        | 0           | 0           | 0           | 4.82        |

|                              |              |              |              |              |               |
|------------------------------|--------------|--------------|--------------|--------------|---------------|
| 488                          | 2.81         | 0            | 0            | 0.40         | 3.21          |
| 490                          | 11.25        | 13.26        | 9.64         | 9.24         | 43.39         |
| 492                          | 0            | 0.40         | 1.61         | 0            | 2.01          |
| 493                          | 1.61         | 2.01         | 1.61         | 2.01         | 7.23          |
| 494                          | 0            | 0.40         | 0.80         | 0.40         | 1.61          |
| 495                          | 0            | 0.40         | 0.40         | 0.40         | 1.21          |
| 498                          | 0.40         | 0.40         | 0            | 0            | 0.80          |
| <b>MI - MICHIGAN - Total</b> | <b>30.54</b> | <b>25.31</b> | <b>24.51</b> | <b>20.89</b> | <b>101.26</b> |

**STATE: MN - MINNESOTA**

| REGISTRANT ZIP CODE 3         | 1ST QUARTER  | 2ND QUARTER  | 3RD QUARTER  | 4TH QUARTER  | TOTAL GRAMS   |
|-------------------------------|--------------|--------------|--------------|--------------|---------------|
| 550                           | 2.01         | 1.61         | 2.81         | 2.41         | 8.84          |
| 551                           | 5.63         | 6.03         | 8.04         | 9.64         | 29.33         |
| 553                           | 6.83         | 6.43         | 8.44         | 8.44         | 30.14         |
| 554                           | 31.74        | 28.13        | 32.15        | 36.57        | 128.59        |
| 557                           | 2.41         | 2.81         | 3.21         | 2.81         | 11.25         |
| 558                           | 0            | 0            | 0.80         | 0.80         | 1.61          |
| 559                           | 20.49        | 16.47        | 14.86        | 10.44        | 62.26         |
| 560                           | 1.21         | 2.41         | 0            | 2.41         | 6.03          |
| 561                           | 0.40         | 0            | 0            | 0            | 0.40          |
| 562                           | 0.40         | 0.80         | 0            | 0            | 1.21          |
| 563                           | 1.61         | 2.01         | 0            | 2.01         | 5.63          |
| 565                           | 2.81         | 2.41         | 1.21         | 2.41         | 8.84          |
| 566                           | 1.61         | 2.01         | 2.41         | 0.80         | 6.83          |
| <b>MN - MINNESOTA - Total</b> | <b>77.14</b> | <b>71.12</b> | <b>73.93</b> | <b>78.75</b> | <b>300.95</b> |

**STATE: MO - MISSOURI**

| REGISTRANT ZIP CODE 3        | 1ST QUARTER  | 2ND QUARTER  | 3RD QUARTER  | 4TH QUARTER  | TOTAL GRAMS   |
|------------------------------|--------------|--------------|--------------|--------------|---------------|
| 630                          | 4.82         | 2.81         | 1.21         | 0.80         | 9.64          |
| 631                          | 13.26        | 32.95        | 32.94        | 45.80        | 124.95        |
| 633                          | 0            | 1.21         | 0            | 1.61         | 2.81          |
| 634                          | 0.40         | 0            | 0            | 0            | 0.40          |
| 636                          | 0.40         | 0            | 0.40         | 0            | 0.80          |
| 637                          | 0            | 0            | 0.80         | 1.21         | 2.01          |
| 639                          | 1.21         | 1.21         | 1.61         | 2.01         | 6.03          |
| 640                          | 1.61         | 2.41         | 1.61         | 2.81         | 8.44          |
| 641                          | 2.81         | 1.61         | 1.61         | 0            | 6.03          |
| 645                          | 2.01         | 0.40         | 0.40         | 1.61         | 4.42          |
| 648                          | 0            | 0            | 0            | 0.40         | 0.40          |
| 654                          | 0            | 0.40         | 0.40         | 0.40         | 1.21          |
| 655                          | 1.21         | 1.61         | 0.80         | 1.61         | 5.22          |
| <b>MO - MISSOURI - Total</b> | <b>27.73</b> | <b>44.60</b> | <b>41.78</b> | <b>58.25</b> | <b>172.36</b> |

**STATE: MS - MISSISSIPPI**

| REGISTRANT ZIP CODE 3           | 1ST QUARTER | 2ND QUARTER | 3RD QUARTER | 4TH QUARTER  | TOTAL GRAMS  |
|---------------------------------|-------------|-------------|-------------|--------------|--------------|
| 389                             | 0           | 0.80        | 0           | 0            | 0.80         |
| 392                             | 4.02        | 4.02        | 6.03        | 8.44         | 22.50        |
| 394                             | 0.80        | 0           | 0           | 0.80         | 1.61         |
| 396                             | 1.61        | 0.80        | 1.61        | 0.40         | 4.42         |
| 397                             | 0           | 0.40        | 0.80        | 0.40         | 1.61         |
| <b>MS - MISSISSIPPI - Total</b> | <b>6.43</b> | <b>6.03</b> | <b>8.44</b> | <b>10.04</b> | <b>30.94</b> |

**STATE: MT - MONTANA**

| REGISTRANT ZIP CODE 3       | 1ST QUARTER | 2ND QUARTER | 3RD QUARTER | 4TH QUARTER | TOTAL GRAMS |
|-----------------------------|-------------|-------------|-------------|-------------|-------------|
| 596                         | 0           | 0.40        | 0           | 0           | 0.40        |
| <b>MT - MONTANA - Total</b> | <b>0.00</b> | <b>0.40</b> | <b>0.00</b> | <b>0.00</b> | <b>0.40</b> |

**STATE: NC - NORTH CAROLINA**

| REGISTRANT ZIP CODE 3              | 1ST QUARTER  | 2ND QUARTER  | 3RD QUARTER  | 4TH QUARTER  | TOTAL GRAMS   |
|------------------------------------|--------------|--------------|--------------|--------------|---------------|
| 270                                | 0            | 1.61         | 2.01         | 0.80         | 4.42          |
| 272                                | 2.01         | 2.01         | 2.41         | 1.21         | 7.64          |
| 273                                | 0.40         | 0            | 0            | 0.80         | 1.21          |
| 274                                | 2.81         | 2.41         | 1.61         | 2.01         | 8.84          |
| 275                                | 12.86        | 13.26        | 15.67        | 10.85        | 52.64         |
| 276                                | 9.24         | 6.03         | 3.21         | 3.21         | 21.70         |
| 277                                | 2.81         | 2.81         | 1.21         | 0            | 6.83          |
| 278                                | 0.40         | 0            | 0            | 0            | 0.40          |
| 280                                | 3.62         | 6.83         | 5.63         | 2.01         | 18.08         |
| 281                                | 4.42         | 4.02         | 4.82         | 4.42         | 17.68         |
| 282                                | 3.21         | 4.82         | 3.21         | 4.02         | 15.27         |
| 283                                | 3.21         | 4.42         | 2.41         | 2.41         | 12.46         |
| 284                                | 0            | 0.40         | 0.80         | 0            | 1.21          |
| 285                                | 0            | 0            | 4.02         | 4.42         | 8.44          |
| 286                                | 1.61         | 0.40         | 0            | 0            | 2.01          |
| 287                                | 2.41         | 1.21         | 1.21         | 2.01         | 6.83          |
| 288                                | 1.21         | 1.61         | 2.01         | 0.80         | 5.62          |
| <b>NC - NORTH CAROLINA - Total</b> | <b>50.23</b> | <b>51.83</b> | <b>50.23</b> | <b>38.97</b> | <b>191.26</b> |

**STATE: ND - NORTH DAKOTA**

| REGISTRANT ZIP CODE 3            | 1ST QUARTER | 2ND QUARTER | 3RD QUARTER | 4TH QUARTER | TOTAL GRAMS  |
|----------------------------------|-------------|-------------|-------------|-------------|--------------|
| 581                              | 0.80        | 2.01        | 0.40        | 2.01        | 5.22         |
| 584                              | 0.80        | 3.62        | 3.62        | 2.01        | 10.04        |
| 587                              | 2.01        | 1.61        | 0           | 0.40        | 4.02         |
| <b>ND - NORTH DAKOTA - Total</b> | <b>3.62</b> | <b>7.23</b> | <b>4.02</b> | <b>4.42</b> | <b>19.28</b> |

**STATE: NE - NEBRASKA**

| REGISTRANT ZIP CODE 3 | 1ST QUARTER | 2ND QUARTER | 3RD QUARTER | 4TH QUARTER | TOTAL GRAMS |
|-----------------------|-------------|-------------|-------------|-------------|-------------|
|-----------------------|-------------|-------------|-------------|-------------|-------------|

|                              |             |             |             |             |              |
|------------------------------|-------------|-------------|-------------|-------------|--------------|
| 681                          | 1.61        | 2.01        | 4.02        | 1.21        | 8.84         |
| 684                          | 1.61        | 1.61        | 0           | 0           | 3.21         |
| 685                          | 0.80        | 0.80        | 1.61        | 0           | 3.21         |
| 687                          | 0.40        | 0           | 0           | 0           | 0.40         |
| 693                          | 0.80        | 1.61        | 2.01        | 0           | 4.42         |
| <b>NE - NEBRASKA - Total</b> | <b>5.22</b> | <b>6.03</b> | <b>7.63</b> | <b>1.21</b> | <b>20.09</b> |

**STATE: NH - NEW HAMPSHIRE**

| REGISTRANT ZIP CODE 3             | 1ST QUARTER | 2ND QUARTER | 3RD QUARTER | 4TH QUARTER | TOTAL GRAMS  |
|-----------------------------------|-------------|-------------|-------------|-------------|--------------|
| 030                               | 0.40        | 0           | 0           | 0           | 0.40         |
| 031                               | 0.80        | 2.41        | 2.41        | 1.61        | 7.23         |
| 037                               | 2.41        | 1.61        | 2.41        | 2.41        | 8.84         |
| 038                               | 2.01        | 1.21        | 0           | 0           | 3.21         |
| <b>NH - NEW HAMPSHIRE - Total</b> | <b>5.63</b> | <b>5.22</b> | <b>4.82</b> | <b>4.02</b> | <b>19.69</b> |

**STATE: NJ - NEW JERSEY**

| REGISTRANT ZIP CODE 3          | 1ST QUARTER  | 2ND QUARTER  | 3RD QUARTER  | 4TH QUARTER  | TOTAL GRAMS   |
|--------------------------------|--------------|--------------|--------------|--------------|---------------|
| 070                            | 5.22         | 4.82         | 2.41         | 4.42         | 16.88         |
| 073                            | 0.80         | 0            | 0            | 0            | 0.80          |
| 074                            | 2.01         | 1.21         | 0.40         | 0.40         | 4.02          |
| 076                            | 10.85        | 6.43         | 10.05        | 4.42         | 31.74         |
| 077                            | 0            | 0            | 0.40         | 0            | 0.40          |
| 078                            | 6.43         | 5.63         | 4.82         | 4.02         | 20.90         |
| 079                            | 2.01         | 0.80         | 2.01         | 2.01         | 6.83          |
| 080                            | 8.44         | 8.04         | 5.63         | 5.22         | 27.32         |
| 081                            | 1.21         | 0.80         | 1.21         | 0.40         | 3.62          |
| 082                            | 0            | 0            | 0            | 0.40         | 0.40          |
| 083                            | 0            | 0            | 0.80         | 0            | 0.80          |
| 085                            | 2.01         | 2.01         | 1.61         | 1.61         | 7.23          |
| 086                            | 0.40         | 0            | 0            | 0.40         | 0.80          |
| 087                            | 0            | 0            | 0            | 0.80         | 0.80          |
| 088                            | 4.02         | 2.81         | 4.42         | 5.63         | 16.88         |
| <b>NJ - NEW JERSEY - Total</b> | <b>43.40</b> | <b>32.55</b> | <b>33.75</b> | <b>29.73</b> | <b>139.43</b> |

**STATE: NM - NEW MEXICO**

| REGISTRANT ZIP CODE 3          | 1ST QUARTER | 2ND QUARTER | 3RD QUARTER | 4TH QUARTER | TOTAL GRAMS  |
|--------------------------------|-------------|-------------|-------------|-------------|--------------|
| 871                            | 4.42        | 2.01        | 2.81        | 4.42        | 13.66        |
| 880                            | 0           | 0.40        | 3.21        | 3.21        | 6.83         |
| 882                            | 0.40        | 0.80        | 0           | 0.80        | 2.01         |
| 883                            | 0           | 0           | 0           | 0.40        | 0.40         |
| <b>NM - NEW MEXICO - Total</b> | <b>4.82</b> | <b>3.21</b> | <b>6.03</b> | <b>8.84</b> | <b>22.90</b> |

**STATE: NV - NEVADA**

| REGISTRANT ZIP CODE 3 | 1ST QUARTER | 2ND QUARTER | 3RD QUARTER | 4TH QUARTER | TOTAL GRAMS |
|-----------------------|-------------|-------------|-------------|-------------|-------------|
|-----------------------|-------------|-------------|-------------|-------------|-------------|

|                            |              |              |              |              |              |
|----------------------------|--------------|--------------|--------------|--------------|--------------|
| 891                        | 16.88        | 22.91        | 15.67        | 12.86        | <b>68.31</b> |
| 893                        | 0.80         | 0.80         | 0.80         | 0            | <b>2.41</b>  |
| 894                        | 0.40         | 0            | 0.80         | 0            | <b>1.21</b>  |
| 895                        | 1.21         | 0.80         | 3.62         | 1.21         | <b>6.83</b>  |
| 898                        | 0            | 1.21         | 2.01         | 0            | <b>3.21</b>  |
| <b>NV - NEVADA - Total</b> | <b>19.29</b> | <b>25.72</b> | <b>22.90</b> | <b>14.06</b> | <b>81.98</b> |

**STATE: NY - NEW YORK**

| REGISTRANT ZIP CODE 3 | 1ST QUARTER | 2ND QUARTER | 3RD QUARTER | 4TH QUARTER | TOTAL GRAMS  |
|-----------------------|-------------|-------------|-------------|-------------|--------------|
| 100                   | 27.32       | 22.50       | 21.70       | 18.48       | <b>90.01</b> |
| 101                   | 0.40        | 0.40        | 1.21        | 0           | <b>2.01</b>  |
| 102                   | 0.80        | 0           | 0           | 0           | <b>0.80</b>  |
| 104                   | 0           | 0.80        | 0.80        | 0.40        | <b>2.01</b>  |
| 105                   | 0.40        | 4.42        | 1.61        | 2.41        | <b>8.84</b>  |
| 106                   | 10.85       | 9.64        | 12.05       | 6.83        | <b>39.37</b> |
| 107                   | 0           | 0           | 0           | 2.81        | <b>2.81</b>  |
| 109                   | 5.22        | 2.81        | 2.01        | 2.41        | <b>12.46</b> |
| 110                   | 0           | 0.40        | 1.61        | 2.81        | <b>4.82</b>  |
| 111                   | 0.40        | 0.80        | 0           | 1.21        | <b>2.41</b>  |
| 112                   | 1.61        | 1.61        | 2.41        | 4.02        | <b>9.64</b>  |
| 113                   | 3.21        | 2.81        | 2.81        | 2.01        | <b>10.85</b> |
| 114                   | 2.01        | 1.61        | 2.41        | 1.21        | <b>7.23</b>  |
| 115                   | 3.62        | 4.02        | 3.21        | 3.62        | <b>14.46</b> |
| 116                   | 0           | 1.61        | 0.80        | 1.61        | <b>4.02</b>  |
| 117                   | 11.65       | 10.04       | 10.04       | 12.05       | <b>43.79</b> |
| 120                   | 1.61        | 1.61        | 1.21        | 2.01        | <b>6.43</b>  |
| 121                   | 0           | 0           | 0.40        | 0           | <b>0.40</b>  |
| 122                   | 0           | 0           | 0.40        | 0.40        | <b>0.80</b>  |
| 123                   | 4.42        | 3.62        | 3.21        | 3.21        | <b>14.47</b> |
| 124                   | 0.40        | 0           | 0           | 0.40        | <b>0.80</b>  |
| 127                   | 0.80        | 0.40        | 0           | 0           | <b>1.21</b>  |
| 128                   | 1.21        | 1.21        | 1.61        | 0           | <b>4.02</b>  |
| 130                   | 2.01        | 2.41        | 2.01        | 2.01        | <b>8.44</b>  |
| 133                   | 0           | 0           | 0.40        | 0           | <b>0.40</b>  |
| 138                   | 0.40        | 0           | 0           | 0           | <b>0.40</b>  |
| 139                   | 0.80        | 0.80        | 0.40        | 0.80        | <b>2.81</b>  |
| 140                   | 6.03        | 6.03        | 9.24        | 6.43        | <b>27.73</b> |
| 141                   | 2.81        | 3.21        | 2.81        | 3.21        | <b>12.06</b> |
| 142                   | 2.81        | 3.21        | 0           | 0           | <b>6.03</b>  |
| 146                   | 2.41        | 0           | 1.21        | 1.61        | <b>5.22</b>  |
| 148                   | 4.42        | 4.42        | 4.02        | 6.03        | <b>18.89</b> |

|                              |              |              |              |              |               |
|------------------------------|--------------|--------------|--------------|--------------|---------------|
| <b>NY - NEW YORK - Total</b> | <b>97.64</b> | <b>90.41</b> | <b>89.60</b> | <b>87.99</b> | <b>365.64</b> |
|------------------------------|--------------|--------------|--------------|--------------|---------------|

**STATE: OH - OHIO**

| REGISTRANT ZIP CODE 3    | 1ST QUARTER  | 2ND QUARTER  | 3RD QUARTER  | 4TH QUARTER  | TOTAL GRAMS   |
|--------------------------|--------------|--------------|--------------|--------------|---------------|
| 430                      | 0            | 2.81         | 4.02         | 4.42         | 11.25         |
| 431                      | 0.80         | 0            | 2.41         | 2.81         | 6.03          |
| 432                      | 2.81         | 40.99        | 4.42         | 4.82         | 53.04         |
| 434                      | 0            | 0            | 0            | 0.40         | 0.40          |
| 439                      | 0            | 0            | 0.40         | 0.40         | 0.80          |
| 440                      | 0            | 7.23         | 5.22         | 5.63         | 18.08         |
| 441                      | 1.61         | 1.21         | 0.80         | 0.80         | 4.42          |
| 445                      | 1.21         | 3.21         | 1.21         | 0            | 5.63          |
| 448                      | 1.61         | 0.80         | 1.21         | 1.21         | 4.82          |
| 450                      | 4.82         | 7.23         | 5.63         | 4.42         | 22.10         |
| 452                      | 0.40         | 2.01         | 0.80         | 0.40         | 3.62          |
| 453                      | 0.80         | 0.80         | 1.61         | 1.21         | 4.42          |
| 454                      | 4.02         | 4.02         | 5.22         | 5.63         | 18.89         |
| 457                      | 2.01         | 1.21         | 0.80         | 0            | 4.02          |
| <b>OH - OHIO - Total</b> | <b>20.09</b> | <b>71.53</b> | <b>33.75</b> | <b>32.15</b> | <b>157.52</b> |

**STATE: OK - OKLAHOMA**

| REGISTRANT ZIP CODE 3        | 1ST QUARTER  | 2ND QUARTER  | 3RD QUARTER  | 4TH QUARTER  | TOTAL GRAMS  |
|------------------------------|--------------|--------------|--------------|--------------|--------------|
| 730                          | 1.61         | 0.80         | 2.01         | 0.40         | 4.82         |
| 731                          | 1.61         | 2.01         | 2.81         | 2.41         | 8.84         |
| 735                          | 1.21         | 2.41         | 1.21         | 0            | 4.82         |
| 737                          | 1.21         | 0            | 0            | 0            | 1.21         |
| 740                          | 4.02         | 5.22         | 6.83         | 6.03         | 22.10        |
| 741                          | 2.81         | 0.80         | 0.80         | 0            | 4.42         |
| 743                          | 0            | 0            | 0            | 0.40         | 0.40         |
| 745                          | 0.40         | 0            | 0            | 0            | 0.40         |
| 747                          | 1.61         | 0.40         | 0.80         | 0            | 2.81         |
| 748                          | 1.61         | 0.80         | 0.80         | 1.61         | 4.82         |
| <b>OK - OKLAHOMA - Total</b> | <b>16.07</b> | <b>12.46</b> | <b>15.27</b> | <b>10.85</b> | <b>54.65</b> |

**STATE: OR - OREGON**

| REGISTRANT ZIP CODE 3 | 1ST QUARTER | 2ND QUARTER | 3RD QUARTER | 4TH QUARTER | TOTAL GRAMS |
|-----------------------|-------------|-------------|-------------|-------------|-------------|
| 970                   | 7.63        | 6.43        | 11.65       | 11.25       | 36.96       |
| 971                   | 0.40        | 0.40        | 0           | 1.61        | 2.41        |
| 972                   | 8.44        | 7.63        | 12.86       | 12.05       | 40.98       |
| 973                   | 8.44        | 1.61        | 0.80        | 1.61        | 12.46       |
| 974                   | 2.01        | 0           | 0.40        | 0.40        | 2.81        |
| 975                   | 0.40        | 0.40        | 0.40        | 0.40        | 1.61        |
| 977                   | 0.40        | 0           | 0.80        | 0.80        | 2.01        |



|                            |              |              |              |              |               |
|----------------------------|--------------|--------------|--------------|--------------|---------------|
| 978                        | 12.05        | 10.85        | 8.03         | 12.05        | 42.98         |
| <b>OR - OREGON - Total</b> | <b>39.78</b> | <b>27.32</b> | <b>34.95</b> | <b>40.17</b> | <b>142.23</b> |

**STATE: PA - PENNSYLVANIA**

| REGISTRANT ZIP CODE 3            | 1ST QUARTER   | 2ND QUARTER   | 3RD QUARTER   | 4TH QUARTER   | TOTAL GRAMS   |
|----------------------------------|---------------|---------------|---------------|---------------|---------------|
| 150                              | 5.22          | 11.25         | 6.03          | 7.23          | 29.73         |
| 151                              | 6.43          | 2.01          | 5.62          | 8.44          | 22.50         |
| 152                              | 23.30         | 18.89         | 14.06         | 11.65         | 67.90         |
| 156                              | 0             | 0             | 0             | 1.21          | 1.21          |
| 160                              | 2.01          | 0             | 0             | 0             | 2.01          |
| 168                              | 5.22          | 3.62          | 2.41          | 1.21          | 12.46         |
| 169                              | 0             | 0             | 0.40          | 0             | 0.40          |
| 170                              | 0.80          | 2.81          | 0             | 2.81          | 6.43          |
| 171                              | 3.62          | 3.21          | 2.01          | 2.81          | 11.65         |
| 172                              | 0             | 0.80          | 0.80          | 1.21          | 2.81          |
| 173                              | 2.01          | 0.80          | 0.40          | 0.40          | 3.62          |
| 174                              | 1.61          | 0.40          | 0             | 0.40          | 2.41          |
| 177                              | 0.40          | 0.40          | 0             | 0             | 0.80          |
| 178                              | 2.81          | 3.21          | 2.81          | 2.01          | 10.85         |
| 179                              | 0             | 0.80          | 2.41          | 2.81          | 6.03          |
| 180                              | 2.81          | 2.81          | 2.81          | 1.61          | 10.04         |
| 181                              | 1.61          | 2.01          | 1.61          | 2.01          | 7.23          |
| 182                              | 0             | 0.80          | 0.40          | 0             | 1.21          |
| 183                              | 0             | 4.02          | 2.81          | 4.02          | 10.85         |
| 184                              | 3.62          | 6.03          | 4.42          | 4.42          | 18.48         |
| 186                              | 2.41          | 1.61          | 1.61          | 2.01          | 7.63          |
| 187                              | 35.36         | 28.53         | 32.15         | 36.57         | 132.60        |
| 189                              | 5.63          | 7.23          | 6.43          | 6.43          | 25.72         |
| 190                              | 7.64          | 7.63          | 7.23          | 10.04         | 32.55         |
| 191                              | 5.22          | 6.03          | 4.42          | 5.63          | 21.30         |
| 193                              | 1.21          | 3.62          | 3.21          | 2.41          | 10.45         |
| 194                              | 2.81          | 4.02          | 3.62          | 7.63          | 18.08         |
| 195                              | 0             | 0.80          | 0             | 0.80          | 1.61          |
| 196                              | 0.80          | 0.80          | 0.40          | 0.80          | 2.81          |
| <b>PA - PENNSYLVANIA - Total</b> | <b>122.55</b> | <b>124.16</b> | <b>108.09</b> | <b>126.56</b> | <b>481.36</b> |

**STATE: RI - RHODE ISLAND**

| REGISTRANT ZIP CODE 3            | 1ST QUARTER | 2ND QUARTER | 3RD QUARTER | 4TH QUARTER | TOTAL GRAMS  |
|----------------------------------|-------------|-------------|-------------|-------------|--------------|
| 028                              | 3.21        | 4.42        | 2.01        | 4.42        | 14.06        |
| 029                              | 0.40        | 0           | 0           | 0.40        | 0.80         |
| <b>RI - RHODE ISLAND - Total</b> | <b>3.62</b> | <b>4.42</b> | <b>2.01</b> | <b>4.82</b> | <b>14.87</b> |

**STATE: SC - SOUTH CAROLINA**

| REGISTRANT ZIP CODE 3              | 1ST QUARTER  | 2ND QUARTER  | 3RD QUARTER  | 4TH QUARTER  | TOTAL GRAMS  |
|------------------------------------|--------------|--------------|--------------|--------------|--------------|
| 290                                | 0.40         | 0.80         | 0.80         | 0            | 2.01         |
| 291                                | 0            | 0.80         | 0            | 1.21         | 2.01         |
| 292                                | 4.82         | 4.02         | 3.21         | 4.82         | 16.87        |
| 293                                | 0.80         | 3.62         | 1.61         | 2.81         | 8.84         |
| 294                                | 2.81         | 1.61         | 2.01         | 3.62         | 10.05        |
| 295                                | 3.21         | 6.03         | 2.81         | 3.62         | 15.67        |
| 296                                | 4.02         | 2.41         | 3.62         | 7.23         | 17.28        |
| <b>SC - SOUTH CAROLINA - Total</b> | <b>16.07</b> | <b>19.29</b> | <b>14.06</b> | <b>23.31</b> | <b>72.73</b> |

**STATE: SD - SOUTH DAKOTA**

| REGISTRANT ZIP CODE 3            | 1ST QUARTER  | 2ND QUARTER | 3RD QUARTER | 4TH QUARTER | TOTAL GRAMS  |
|----------------------------------|--------------|-------------|-------------|-------------|--------------|
| 570                              | 0            | 0           | 0           | 0.40        | 0.40         |
| 571                              | 10.45        | 6.43        | 5.22        | 7.63        | 29.73        |
| 577                              | 0.40         | 0.40        | 0.40        | 0           | 1.21         |
| <b>SD - SOUTH DAKOTA - Total</b> | <b>10.85</b> | <b>6.83</b> | <b>5.63</b> | <b>8.03</b> | <b>31.34</b> |

**STATE: TN - TENNESSEE**

| REGISTRANT ZIP CODE 3         | 1ST QUARTER  | 2ND QUARTER  | 3RD QUARTER  | 4TH QUARTER  | TOTAL GRAMS  |
|-------------------------------|--------------|--------------|--------------|--------------|--------------|
| 370                           | 1.21         | 1.61         | 0.80         | 0.80         | 4.42         |
| 372                           | 0.80         | 3.21         | 7.64         | 2.41         | 14.06        |
| 373                           | 0.40         | 0            | 0            | 0            | 0.40         |
| 374                           | 1.21         | 0            | 0.40         | 0.40         | 2.01         |
| 376                           | 0            | 0            | 0.40         | 0            | 0.40         |
| 378                           | 1.21         | 2.01         | 0.80         | 1.61         | 5.63         |
| 379                           | 1.61         | 0.40         | 1.21         | 0.80         | 4.02         |
| 380                           | 0.80         | 0.80         | 2.41         | 0.80         | 4.82         |
| 381                           | 7.23         | 4.82         | 4.42         | 6.43         | 22.91        |
| 383                           | 0            | 0.40         | 0            | 0            | 0.40         |
| <b>TN - TENNESSEE - Total</b> | <b>14.47</b> | <b>13.26</b> | <b>18.08</b> | <b>13.26</b> | <b>59.07</b> |

**STATE: TX - TEXAS**

| REGISTRANT ZIP CODE 3 | 1ST QUARTER | 2ND QUARTER | 3RD QUARTER | 4TH QUARTER | TOTAL GRAMS |
|-----------------------|-------------|-------------|-------------|-------------|-------------|
| 750                   | 21.70       | 22.91       | 28.53       | 21.30       | 94.43       |
| 751                   | 1.61        | 0           | 0.80        | 0           | 2.41        |
| 752                   | 18.88       | 22.10       | 14.87       | 16.87       | 72.72       |
| 754                   | 2.01        | 2.41        | 2.81        | 2.41        | 9.64        |
| 756                   | 1.61        | 3.62        | 4.42        | 0.80        | 10.45       |
| 757                   | 1.61        | 2.41        | 3.21        | 4.42        | 11.65       |
| 759                   | 1.21        | 0           | 0           | 0           | 1.21        |
| 760                   | 8.44        | 2.41        | 2.01        | 2.41        | 15.27       |
| 761                   | 1.61        | 2.81        | 1.61        | 3.62        | 9.64        |
| 762                   | 4.82        | 2.41        | 0.40        | 1.61        | 9.24        |

|                           |               |               |               |               |               |
|---------------------------|---------------|---------------|---------------|---------------|---------------|
| 764                       | 1.21          | 1.21          | 0             | 0.80          | 3.21          |
| 769                       | 2.81          | 0.40          | 2.41          | 0             | 5.63          |
| 770                       | 12.05         | 13.66         | 11.25         | 10.45         | 47.41         |
| 773                       | 3.21          | 2.01          | 1.61          | 2.01          | 8.84          |
| 774                       | 2.81          | 3.21          | 2.81          | 2.81          | 11.65         |
| 775                       | 0.80          | 0             | 2.01          | 2.01          | 4.82          |
| 778                       | 0.40          | 0             | 0             | 0.40          | 0.80          |
| 779                       | 0             | 0             | 0             | 0.40          | 0.40          |
| 780                       | 0             | 0             | 1.21          | 0.80          | 2.01          |
| 781                       | 1.21          | 0.80          | 0             | 0.40          | 2.41          |
| 782                       | 1.61          | 1.61          | 4.02          | 4.82          | 12.05         |
| 784                       | 0.80          | 1.61          | 1.21          | 4.02          | 7.64          |
| 785                       | 1.21          | 1.21          | 2.41          | 2.01          | 6.83          |
| 786                       | 2.81          | 2.41          | 1.21          | 2.81          | 9.24          |
| 787                       | 6.03          | 12.06         | 8.04          | 10.05         | 36.16         |
| 788                       | 3.21          | 4.02          | 3.62          | 3.21          | 14.06         |
| 789                       | 0.80          | 0.40          | 1.61          | 1.21          | 4.02          |
| 790                       | 1.61          | 2.41          | 1.21          | 1.21          | 6.43          |
| 797                       | 0.80          | 0.40          | 0.40          | 2.41          | 4.02          |
| <b>TX - TEXAS - Total</b> | <b>106.88</b> | <b>108.49</b> | <b>103.66</b> | <b>105.27</b> | <b>424.31</b> |

**STATE: UT - UTAH**

| REGISTRANT ZIP CODE 3    | 1ST QUARTER  | 2ND QUARTER  | 3RD QUARTER  | 4TH QUARTER  | TOTAL GRAMS  |
|--------------------------|--------------|--------------|--------------|--------------|--------------|
| 840                      | 10.05        | 6.03         | 4.02         | 6.43         | 26.52        |
| 841                      | 4.42         | 4.02         | 2.01         | 1.61         | 12.06        |
| 845                      | 0.40         | 0            | 0            | 0            | 0.40         |
| 846                      | 6.03         | 6.43         | 7.23         | 4.82         | 24.51        |
| 847                      | 8.04         | 7.23         | 8.44         | 7.23         | 30.94        |
| <b>UT - UTAH - Total</b> | <b>28.93</b> | <b>23.71</b> | <b>21.70</b> | <b>20.09</b> | <b>94.43</b> |

**STATE: VA - VIRGINIA**

| REGISTRANT ZIP CODE 3 | 1ST QUARTER | 2ND QUARTER | 3RD QUARTER | 4TH QUARTER | TOTAL GRAMS |
|-----------------------|-------------|-------------|-------------|-------------|-------------|
| 201                   | 3.62        | 2.81        | 5.22        | 4.82        | 16.48       |
| 220                   | 1.61        | 0.40        | 0           | 0           | 2.01        |
| 221                   | 0.80        | 0           | 0           | 0           | 0.80        |
| 222                   | 0.80        | 0.40        | 0           | 0           | 1.21        |
| 223                   | 2.01        | 2.01        | 2.01        | 2.41        | 8.44        |
| 224                   | 2.41        | 0           | 0           | 0.80        | 3.21        |
| 228                   | 0           | 0.80        | 2.01        | 0.40        | 3.21        |
| 229                   | 1.61        | 0           | 2.01        | 0           | 3.62        |
| 231                   | 2.81        | 1.21        | 3.21        | 2.81        | 10.05       |
| 232                   | 3.21        | 6.03        | 2.81        | 2.81        | 14.87       |

|                              |              |              |              |              |               |
|------------------------------|--------------|--------------|--------------|--------------|---------------|
| 234                          | 2.81         | 3.21         | 4.82         | 2.81         | 13.66         |
| 235                          | 2.41         | 2.01         | 1.61         | 2.01         | 8.04          |
| 236                          | 0.80         | 0            | 0            | 0            | 0.80          |
| 237                          | 0.80         | 1.21         | 1.21         | 0.80         | 4.02          |
| 238                          | 2.41         | 1.61         | 2.01         | 2.41         | 8.44          |
| 240                          | 4.42         | 6.03         | 4.82         | 4.02         | 19.29         |
| 241                          | 2.01         | 0.80         | 0            | 2.01         | 4.82          |
| 242                          | 0            | 0.40         | 0.80         | 0.40         | 1.61          |
| 245                          | 0.40         | 0            | 0.40         | 0.80         | 1.61          |
| <b>VA - VIRGINIA - Total</b> | <b>34.96</b> | <b>28.93</b> | <b>32.95</b> | <b>29.33</b> | <b>126.17</b> |

**STATE: VT - VERMONT**

| REGISTRANT ZIP CODE 3       | 1ST QUARTER | 2ND QUARTER | 3RD QUARTER | 4TH QUARTER | TOTAL GRAMS |
|-----------------------------|-------------|-------------|-------------|-------------|-------------|
| 054                         | 0           | 0           | 0           | 0.40        | 0.40        |
| 056                         | 1.21        | 0           | 2.01        | 0.40        | 3.62        |
| 057                         | 0.80        | 1.21        | 0.80        | 0           | 2.81        |
| 058                         | 0           | 0           | 0           | 1.61        | 1.61        |
| <b>VT - VERMONT - Total</b> | <b>2.01</b> | <b>1.21</b> | <b>2.81</b> | <b>2.41</b> | <b>8.44</b> |

**STATE: WA - WASHINGTON**

| REGISTRANT ZIP CODE 3          | 1ST QUARTER  | 2ND QUARTER  | 3RD QUARTER  | 4TH QUARTER  | TOTAL GRAMS   |
|--------------------------------|--------------|--------------|--------------|--------------|---------------|
| 980                            | 35.76        | 32.55        | 23.30        | 26.11        | 117.73        |
| 981                            | 11.25        | 14.06        | 16.07        | 13.26        | 54.65         |
| 982                            | 16.07        | 12.86        | 15.27        | 10.04        | 54.24         |
| 983                            | 6.43         | 7.23         | 6.03         | 9.24         | 28.93         |
| 984                            | 2.41         | 2.81         | 2.41         | 2.41         | 10.05         |
| 985                            | 0.40         | 0.40         | 0.40         | 0            | 1.21          |
| 986                            | 12.86        | 13.66        | 16.88        | 10.04        | 53.44         |
| 992                            | 5.22         | 8.04         | 7.23         | 6.43         | 26.92         |
| 993                            | 1.61         | 2.01         | 2.41         | 0            | 6.03          |
| 994                            | 0            | 0            | 0            | 0.40         | 0.40          |
| <b>WA - WASHINGTON - Total</b> | <b>92.02</b> | <b>93.63</b> | <b>90.00</b> | <b>77.94</b> | <b>353.59</b> |

**STATE: WI - WISCONSIN**

| REGISTRANT ZIP CODE 3 | 1ST QUARTER | 2ND QUARTER | 3RD QUARTER | 4TH QUARTER | TOTAL GRAMS |
|-----------------------|-------------|-------------|-------------|-------------|-------------|
| 530                   | 2.81        | 0.80        | 0           | 0           | 3.62        |
| 531                   | 2.01        | 2.01        | 1.61        | 2.81        | 8.44        |
| 532                   | 3.21        | 4.02        | 5.63        | 2.01        | 14.87       |
| 535                   | 2.81        | 2.41        | 2.01        | 2.81        | 10.04       |
| 537                   | 6.83        | 9.64        | 6.83        | 7.63        | 30.94       |
| 539                   | 0.80        | 1.61        | 0.80        | 1.21        | 4.42        |
| 540                   | 0           | 0.80        | 1.61        | 0.80        | 3.21        |
| 541                   | 0.80        | 0           | 0           | 4.42        | 5.22        |

|                               |              |              |              |              |               |
|-------------------------------|--------------|--------------|--------------|--------------|---------------|
| 542                           | 6.83         | 6.43         | 7.63         | 5.63         | 26.52         |
| 543                           | 2.41         | 3.21         | 3.21         | 1.21         | 10.05         |
| 544                           | 0            | 0            | 0.40         | 4.02         | 4.42          |
| 546                           | 0            | 1.21         | 0            | 0            | 1.21          |
| 549                           | 3.62         | 3.62         | 5.62         | 2.41         | 15.26         |
| <b>WI - WISCONSIN - Total</b> | <b>32.14</b> | <b>35.76</b> | <b>35.36</b> | <b>34.95</b> | <b>138.21</b> |

**STATE: WV - WEST VIRGINIA**

| REGISTRANT ZIP CODE 3             | 1ST QUARTER | 2ND QUARTER | 3RD QUARTER | 4TH QUARTER | TOTAL GRAMS  |
|-----------------------------------|-------------|-------------|-------------|-------------|--------------|
| 258                               | 1.21        | 0.40        | 1.21        | 2.41        | 5.22         |
| 260                               | 2.41        | 2.81        | 1.61        | 2.41        | 9.24         |
| 265                               | 1.21        | 0.40        | 0.40        | 2.01        | 4.02         |
| <b>WV - WEST VIRGINIA - Total</b> | <b>4.82</b> | <b>3.62</b> | <b>3.21</b> | <b>6.83</b> | <b>18.48</b> |

**STATE: WY - WYOMING**

| REGISTRANT ZIP CODE 3       | 1ST QUARTER | 2ND QUARTER | 3RD QUARTER | 4TH QUARTER | TOTAL GRAMS  |
|-----------------------------|-------------|-------------|-------------|-------------|--------------|
| 820                         | 4.42        | 2.41        | 2.81        | 2.81        | 12.46        |
| 826                         | 0.40        | 1.21        | 2.41        | 1.21        | 5.22         |
| 830                         | 0           | 0           | 0           | 0.80        | 0.80         |
| <b>WY - WYOMING - Total</b> | <b>4.82</b> | <b>3.62</b> | <b>5.22</b> | <b>4.82</b> | <b>18.48</b> |

**DRUG: 1205 - LISDEXAMFETAMINE****STATE: AK - ALASKA**

| REGISTRANT ZIP CODE 3      | 1ST QUARTER     | 2ND QUARTER     | 3RD QUARTER     | 4TH QUARTER     | TOTAL GRAMS      |
|----------------------------|-----------------|-----------------|-----------------|-----------------|------------------|
| 995                        | 1,268.93        | 1,305.35        | 1,380.50        | 1,413.45        | 5,368.24         |
| 996                        | 571.16          | 619.72          | 615.10          | 604.69          | 2,410.68         |
| 997                        | 331.25          | 333.56          | 367.67          | 341.66          | 1,374.14         |
| 998                        | 246.27          | 219.10          | 217.37          | 207.54          | 890.27           |
| 999                        | 145.10          | 152.62          | 159.56          | 127.76          | 585.04           |
| <b>AK - ALASKA - Total</b> | <b>2,562.72</b> | <b>2,630.36</b> | <b>2,740.19</b> | <b>2,695.10</b> | <b>10,628.37</b> |

**STATE: AL - ALABAMA**

| REGISTRANT ZIP CODE 3 | 1ST QUARTER | 2ND QUARTER | 3RD QUARTER | 4TH QUARTER | TOTAL GRAMS |
|-----------------------|-------------|-------------|-------------|-------------|-------------|
| 350                   | 6,905.98    | 6,726.77    | 6,675.90    | 6,889.22    | 27,197.87   |
| 351                   | 4,679.14    | 4,276.78    | 4,486.63    | 4,649.66    | 18,092.22   |
| 352                   | 9,672.19    | 9,534.03    | 9,601.66    | 10,245.67   | 39,053.55   |
| 354                   | 4,588.38    | 4,317.25    | 4,374.48    | 4,660.06    | 17,940.18   |
| 355                   | 1,298.99    | 1,244.07    | 1,311.13    | 1,289.16    | 5,143.36    |
| 356                   | 4,074.45    | 3,861.13    | 3,997.56    | 4,014.90    | 15,948.04   |
| 357                   | 2,373.68    | 2,344.77    | 2,440.74    | 2,486.99    | 9,646.18    |
| 358                   | 2,685.27    | 2,653.48    | 2,807.25    | 2,870.84    | 11,016.85   |
| 359                   | 2,393.91    | 2,315.29    | 2,344.20    | 2,529.77    | 9,583.16    |
| 360                   | 3,818.93    | 3,526.99    | 3,431.02    | 3,551.27    | 14,328.21   |
| 361                   | 2,858.13    | 2,795.11    | 2,591.62    | 2,943.11    | 11,187.97   |

|                             |                  |                  |                  |                  |                   |
|-----------------------------|------------------|------------------|------------------|------------------|-------------------|
| 362                         | 1,870.15         | 1,701.93         | 1,762.63         | 1,782.28         | 7,116.99          |
| 363                         | 4,146.31         | 4,097.49         | 4,085.52         | 4,114.34         | 16,443.65         |
| 364                         | 1,016.88         | 994.91           | 994.33           | 1,049.25         | 4,055.37          |
| 365                         | 7,825.16         | 7,758.68         | 7,839.04         | 8,018.25         | 31,441.12         |
| 366                         | 6,264.29         | 6,016.86         | 6,026.69         | 6,170.64         | 24,478.49         |
| 367                         | 682.74           | 620.88           | 657.30           | 662.50           | 2,623.42          |
| 368                         | 4,809.79         | 4,213.77         | 4,490.10         | 4,486.06         | 17,999.72         |
| 369                         | 159.56           | 117.93           | 132.96           | 142.79           | 553.24            |
| <b>AL - ALABAMA - Total</b> | <b>72,123.93</b> | <b>69,118.13</b> | <b>70,050.78</b> | <b>72,556.75</b> | <b>283,849.59</b> |

**STATE: AR - ARKANSAS**

| REGISTRANT ZIP CODE 3        | 1ST QUARTER      | 2ND QUARTER      | 3RD QUARTER      | 4TH QUARTER      | TOTAL GRAMS       |
|------------------------------|------------------|------------------|------------------|------------------|-------------------|
| 716                          | 1,430.22         | 1,384.55         | 1,196.67         | 1,278.18         | 5,289.62          |
| 717                          | 672.91           | 627.24           | 628.97           | 625.50           | 2,554.62          |
| 718                          | 807.61           | 720.31           | 698.92           | 809.92           | 3,036.76          |
| 719                          | 1,874.78         | 1,814.66         | 1,819.86         | 1,844.72         | 7,354.01          |
| 720                          | 4,469.87         | 4,259.44         | 4,322.45         | 4,448.48         | 17,500.24         |
| 721                          | 3,259.91         | 3,040.81         | 2,952.93         | 3,202.10         | 12,455.74         |
| 722                          | 3,599.48         | 3,425.91         | 3,468.48         | 3,643.39         | 14,137.26         |
| 723                          | 1,123.83         | 1,083.36         | 1,083.36         | 1,049.25         | 4,339.80          |
| 724                          | 2,759.85         | 2,485.25         | 2,531.50         | 2,491.03         | 10,267.63         |
| 725                          | 682.16           | 607.01           | 599.49           | 624.93           | 2,513.58          |
| 726                          | 819.75           | 752.69           | 750.37           | 755.00           | 3,077.80          |
| 727                          | 5,376.33         | 5,263.60         | 5,335.86         | 5,364.19         | 21,339.98         |
| 728                          | 1,151.00         | 1,046.94         | 1,007.05         | 1,092.03         | 4,297.02          |
| 729                          | 2,628.62         | 2,378.30         | 2,302.57         | 2,479.47         | 9,788.97          |
| <b>AR - ARKANSAS - Total</b> | <b>30,656.30</b> | <b>28,890.06</b> | <b>28,698.50</b> | <b>29,708.18</b> | <b>117,953.04</b> |

**STATE: AZ - ARIZONA**

| REGISTRANT ZIP CODE 3 | 1ST QUARTER | 2ND QUARTER | 3RD QUARTER | 4TH QUARTER | TOTAL GRAMS |
|-----------------------|-------------|-------------|-------------|-------------|-------------|
| 850                   | 6,814.06    | 6,657.40    | 6,758.57    | 7,059.76    | 27,289.79   |
| 851                   | 1,377.61    | 1,408.25    | 1,452.19    | 1,591.51    | 5,829.56    |
| 852                   | 18,668.01   | 22,284.60   | 29,136.24   | 19,583.72   | 89,672.56   |
| 853                   | 4,384.31    | 4,209.72    | 4,299.33    | 4,747.36    | 17,640.72   |
| 855                   | 165.91      | 150.88      | 136.43      | 150.88      | 604.11      |
| 856                   | 597.76      | 653.25      | 619.72      | 684.47      | 2,555.20    |
| 857                   | 4,772.22    | 4,660.06    | 4,530.57    | 4,874.54    | 18,837.39   |
| 859                   | 191.93      | 214.48      | 187.30      | 207.54      | 801.25      |
| 860                   | 332.41      | 331.83      | 326.05      | 402.36      | 1,392.64    |
| 863                   | 807.61      | 728.98      | 768.87      | 809.34      | 3,114.80    |
| 864                   | 286.74      | 300.03      | 344.55      | 349.75      | 1,281.07    |
| 865                   | 1.73        | 1.16        | 0           | 4.62        | 7.52        |

|                             |                  |                  |                  |                  |                   |
|-----------------------------|------------------|------------------|------------------|------------------|-------------------|
| <b>AZ - ARIZONA - Total</b> | <b>38,400.29</b> | <b>41,600.65</b> | <b>48,559.82</b> | <b>40,465.84</b> | <b>169,026.61</b> |
|-----------------------------|------------------|------------------|------------------|------------------|-------------------|

**STATE: CA - CALIFORNIA**

| REGISTRANT ZIP CODE 3 | 1ST QUARTER | 2ND QUARTER | 3RD QUARTER | 4TH QUARTER | TOTAL GRAMS |
|-----------------------|-------------|-------------|-------------|-------------|-------------|
| 900                   | 6,494.95    | 6,317.48    | 6,422.69    | 6,694.40    | 25,929.52   |
| 902                   | 5,070.52    | 5,146.25    | 5,000.57    | 5,086.12    | 20,303.45   |
| 903                   | 101.17      | 105.21      | 106.37      | 86.14       | 398.89      |
| 904                   | 1,040.00    | 1,211.70    | 1,174.70    | 1,216.90    | 4,643.30    |
| 905                   | 767.14      | 812.23      | 729.56      | 741.70      | 3,050.63    |
| 906                   | 1,141.75    | 1,105.33    | 1,040.58    | 1,155.04    | 4,442.70    |
| 907                   | 1,524.45    | 1,499.59    | 1,425.02    | 1,640.65    | 6,089.71    |
| 908                   | 921.78      | 939.82      | 842.75      | 937.68      | 3,642.03    |
| 910                   | 707.02      | 765.40      | 697.77      | 804.14      | 2,974.32    |
| 911                   | 1,460.86    | 1,382.24    | 1,515.78    | 1,500.17    | 5,859.04    |
| 912                   | 493.70      | 548.04      | 442.25      | 512.77      | 1,996.76    |
| 913                   | 5,936.51    | 5,835.92    | 5,931.31    | 5,921.48    | 23,625.21   |
| 914                   | 1,277.02    | 1,347.41    | 1,286.27    | 1,366.63    | 5,277.33    |
| 915                   | 458.43      | 487.34      | 478.67      | 464.21      | 1,888.65    |
| 916                   | 520.29      | 585.62      | 576.94      | 604.69      | 2,287.54    |
| 917                   | 2,933.28    | 2,810.14    | 2,752.33    | 3,128.10    | 11,623.86   |
| 918                   | 121.40      | 109.84      | 123.14      | 145.68      | 500.06      |
| 919                   | 1,010.52    | 889.70      | 968.32      | 905.88      | 3,774.41    |
| 920                   | 13,265.08   | 12,974.88   | 13,420.01   | 14,007.94   | 53,667.91   |
| 921                   | 4,768.40    | 4,914.63    | 5,009.24    | 5,031.78    | 19,724.05   |
| 922                   | 1,320.35    | 1,360.41    | 1,201.49    | 1,437.76    | 5,320.02    |
| 923                   | 1,987.31    | 2,051.23    | 1,955.48    | 1,921.69    | 7,915.71    |
| 924                   | 166.49      | 164.18      | 153.77      | 142.21      | 626.66      |
| 925                   | 2,069.94    | 2,146.86    | 1,916.14    | 2,144.17    | 8,277.12    |
| 926                   | 8,163.35    | 8,026.92    | 7,861.58    | 8,306.72    | 32,358.57   |
| 927                   | 1,337.15    | 1,292.05    | 1,248.12    | 1,255.06    | 5,132.37    |
| 928                   | 2,977.22    | 3,219.44    | 2,923.45    | 3,307.89    | 12,427.99   |
| 930                   | 2,906.11    | 3,083.59    | 2,758.12    | 3,080.69    | 11,828.50   |
| 931                   | 934.21      | 1,037.69    | 918.60      | 991.44      | 3,881.94    |
| 932                   | 1,085.67    | 1,078.16    | 949.82      | 1,143.48    | 4,257.13    |
| 933                   | 835.93      | 848.65      | 777.54      | 914.55      | 3,376.68    |
| 934                   | 1,929.70    | 2,008.32    | 1,809.45    | 1,951.09    | 7,698.56    |
| 935                   | 1,077.58    | 1,045.78    | 1,106.48    | 1,084.52    | 4,314.36    |
| 936                   | 1,448.72    | 1,418.08    | 1,290.32    | 1,352.18    | 5,509.29    |
| 937                   | 1,999.07    | 1,952.24    | 1,924.49    | 1,923.92    | 7,799.73    |
| 939                   | 745.17      | 810.50      | 808.76      | 883.91      | 3,248.34    |
| 940                   | 2,321.07    | 2,381.19    | 2,384.08    | 2,410.10    | 9,496.45    |

|                                |                   |                   |                   |                   |                   |
|--------------------------------|-------------------|-------------------|-------------------|-------------------|-------------------|
| 941                            | 3,817.19          | 4,088.44          | 3,955.94          | 4,212.61          | 16,074.19         |
| 943                            | 480.98            | 452.65            | 442.25            | 491.96            | 1,867.84          |
| 944                            | 517.40            | 543.99            | 538.21            | 532.43            | 2,132.03          |
| 945                            | 4,855.46          | 4,871.65          | 5,008.66          | 5,399.45          | 20,135.22         |
| 946                            | 1,127.30          | 1,137.12          | 1,111.69          | 1,184.53          | 4,560.63          |
| 947                            | 556.71            | 571.16            | 486.76            | 616.25            | 2,230.89          |
| 948                            | 103.48            | 124.29            | 89.03             | 90.18             | 406.98            |
| 949                            | 1,501.90          | 1,451.03          | 1,448.72          | 1,512.89          | 5,914.54          |
| 950                            | 2,310.09          | 2,294.48          | 2,223.95          | 2,414.15          | 9,242.66          |
| 951                            | 1,323.85          | 1,306.51          | 1,274.71          | 1,351.60          | 5,256.66          |
| 952                            | 1,019.19          | 961.38            | 985.08            | 910.51            | 3,876.16          |
| 953                            | 2,341.31          | 2,254.59          | 2,310.09          | 2,454.03          | 9,360.02          |
| 954                            | 617.41            | 694.30            | 679.27            | 709.91            | 2,700.88          |
| 955                            | 116.78            | 157.82            | 163.02            | 148.57            | 586.19            |
| 956                            | 3,310.20          | 3,069.71          | 3,178.97          | 3,525.83          | 13,084.72         |
| 957                            | 1,123.83          | 1,027.86          | 1,077.00          | 1,093.77          | 4,322.45          |
| 958                            | 1,492.65          | 1,463.75          | 1,469.53          | 1,485.14          | 5,911.07          |
| 959                            | 1,438.89          | 1,361.43          | 1,421.55          | 1,346.39          | 5,568.26          |
| 960                            | 839.40            | 827.26            | 913.98            | 777.54            | 3,358.18          |
| 961                            | 126.60            | 112.15            | 105.21            | 153.20            | 497.17            |
| <b>CA - CALIFORNIA - Total</b> | <b>112,339.92</b> | <b>112,485.61</b> | <b>110,815.58</b> | <b>116,614.45</b> | <b>452,255.56</b> |

**STATE: CO - COLORADO**

| REGISTRANT ZIP CODE 3 | 1ST QUARTER | 2ND QUARTER | 3RD QUARTER | 4TH QUARTER | TOTAL GRAMS |
|-----------------------|-------------|-------------|-------------|-------------|-------------|
| 800                   | 4,179.08    | 4,235.74    | 4,355.98    | 4,595.90    | 17,366.70   |
| 801                   | 5,385.00    | 5,398.88    | 5,264.76    | 5,471.72    | 21,520.35   |
| 802                   | 6,277.01    | 6,109.94    | 6,076.41    | 6,492.06    | 24,955.42   |
| 803                   | 1,650.48    | 1,711.75    | 1,626.20    | 1,883.45    | 6,871.87    |
| 804                   | 1,001.85    | 787.95      | 923.23      | 1,007.63    | 3,720.65    |
| 805                   | 3,103.24    | 3,121.16    | 3,125.21    | 3,309.62    | 12,659.23   |
| 806                   | 1,127.30    | 1,160.82    | 1,142.90    | 1,163.14    | 4,594.16    |
| 807                   | 149.15      | 152.04      | 133.54      | 171.12      | 605.85      |
| 808                   | 567.69      | 517.40      | 552.09      | 577.52      | 2,214.70    |
| 809                   | 3,100.35    | 2,978.37    | 3,140.82    | 2,989.36    | 12,208.89   |
| 810                   | 597.76      | 612.79      | 660.77      | 707.59      | 2,578.90    |
| 811                   | 106.37      | 134.12      | 105.79      | 108.10      | 454.39      |
| 812                   | 113.31      | 128.34      | 132.38      | 149.73      | 523.76      |
| 813                   | 175.16      | 147.42      | 198.29      | 209.85      | 730.72      |
| 814                   | 121.40      | 124.29      | 121.40      | 149.15      | 516.24      |
| 815                   | 503.53      | 469.42      | 432.42      | 534.16      | 1,939.53    |
| 816                   | 793.15      | 713.95      | 747.48      | 787.95      | 3,042.54    |



|                              |                  |                  |                  |                  |                   |
|------------------------------|------------------|------------------|------------------|------------------|-------------------|
| <b>CO - COLORADO - Total</b> | <b>28,951.83</b> | <b>28,504.38</b> | <b>28,739.66</b> | <b>30,308.05</b> | <b>116,503.91</b> |
|------------------------------|------------------|------------------|------------------|------------------|-------------------|

**STATE: CT - CONNECTICUT**

| REGISTRANT ZIP CODE 3           | 1ST QUARTER      | 2ND QUARTER      | 3RD QUARTER      | 4TH QUARTER      | TOTAL GRAMS       |
|---------------------------------|------------------|------------------|------------------|------------------|-------------------|
| 060                             | 5,978.71         | 6,207.64         | 5,934.77         | 6,286.84         | 24,407.96         |
| 061                             | 2,122.78         | 2,195.62         | 2,007.16         | 2,233.20         | 8,558.77          |
| 062                             | 1,785.17         | 1,682.85         | 1,690.36         | 1,882.29         | 7,040.68          |
| 063                             | 3,728.17         | 3,773.26         | 3,720.65         | 3,868.65         | 15,090.72         |
| 064                             | 7,451.13         | 7,321.64         | 7,252.84         | 7,525.71         | 29,551.32         |
| 065                             | 1,870.73         | 1,852.23         | 1,837.20         | 1,957.45         | 7,517.61          |
| 066                             | 1,370.10         | 1,449.87         | 1,364.89         | 1,488.61         | 5,673.47          |
| 067                             | 3,219.44         | 3,010.17         | 2,910.73         | 2,947.73         | 12,088.07         |
| 068                             | 7,521.08         | 7,695.67         | 7,489.86         | 7,834.41         | 30,541.02         |
| 069                             | 1,122.09         | 1,004.74         | 1,064.86         | 1,141.75         | 4,333.44          |
| <b>CT - CONNECTICUT - Total</b> | <b>36,169.40</b> | <b>36,193.68</b> | <b>35,273.35</b> | <b>37,166.63</b> | <b>144,803.07</b> |

**STATE: DC - DISTRICT OF COLUMBIA**

| REGISTRANT ZIP CODE 3              | 1ST QUARTER     | 2ND QUARTER     | 3RD QUARTER     | 4TH QUARTER     | TOTAL GRAMS      |
|------------------------------------|-----------------|-----------------|-----------------|-----------------|------------------|
| 200                                | 5,458.42        | 5,689.66        | 5,522.01        | 5,756.72        | 22,426.81        |
| 203                                | 43.36           | 26.59           | 0               | 8.09            | 78.04            |
| 204                                | 30.64           | 19.08           | 32.37           | 21.39           | 103.48           |
| <b>DC - DISTRICT OF COLUMBIA -</b> | <b>5,532.42</b> | <b>5,735.33</b> | <b>5,554.38</b> | <b>5,786.20</b> | <b>22,608.33</b> |

**STATE: DE - DELAWARE**

| REGISTRANT ZIP CODE 3        | 1ST QUARTER      | 2ND QUARTER      | 3RD QUARTER      | 4TH QUARTER      | TOTAL GRAMS      |
|------------------------------|------------------|------------------|------------------|------------------|------------------|
| 197                          | 5,493.11         | 5,260.71         | 4,969.35         | 5,560.17         | 21,283.33        |
| 198                          | 3,476.12         | 3,285.92         | 3,239.09         | 3,380.15         | 13,381.28        |
| 199                          | 5,387.31         | 5,258.98         | 5,044.50         | 5,394.25         | 21,085.04        |
| <b>DE - DELAWARE - Total</b> | <b>14,356.54</b> | <b>13,805.61</b> | <b>13,252.94</b> | <b>14,334.57</b> | <b>55,749.65</b> |

**STATE: FL - FLORIDA**

| REGISTRANT ZIP CODE 3 | 1ST QUARTER | 2ND QUARTER | 3RD QUARTER | 4TH QUARTER | TOTAL GRAMS |
|-----------------------|-------------|-------------|-------------|-------------|-------------|
| 320                   | 4,793.61    | 4,571.61    | 4,441.54    | 4,767.01    | 18,573.77   |
| 321                   | 2,929.23    | 2,900.91    | 2,751.76    | 3,029.82    | 11,611.72   |
| 322                   | 8,570.81    | 8,089.08    | 7,867.91    | 8,742.72    | 33,270.52   |
| 323                   | 5,214.46    | 5,089.59    | 4,899.40    | 5,233.54    | 20,436.99   |
| 324                   | 3,070.87    | 3,009.01    | 2,910.16    | 2,560.40    | 11,550.44   |
| 325                   | 7,729.78    | 7,595.08    | 7,740.76    | 7,856.38    | 30,921.99   |
| 326                   | 3,363.96    | 3,083.35    | 2,930.97    | 3,274.94    | 12,653.22   |
| 327                   | 9,412.23    | 8,987.34    | 8,578.43    | 9,413.78    | 36,391.79   |
| 328                   | 7,813.82    | 7,425.32    | 6,942.08    | 7,836.90    | 30,018.12   |
| 329                   | 6,834.88    | 6,722.15    | 6,368.35    | 7,152.25    | 27,077.63   |
| 330                   | 6,523.86    | 6,336.55    | 6,011.08    | 6,540.05    | 25,411.54   |
| 331                   | 8,351.81    | 7,920.55    | 7,573.11    | 8,383.03    | 32,228.50   |

|                             |                   |                   |                   |                   |                   |
|-----------------------------|-------------------|-------------------|-------------------|-------------------|-------------------|
| 333                         | 3,614.86          | 3,568.61          | 3,400.96          | 3,418.31          | 14,002.74         |
| 334                         | 9,073.28          | 9,024.14          | 8,711.97          | 9,296.43          | 36,105.81         |
| 335                         | 6,921.01          | 6,748.16          | 6,427.32          | 7,096.18          | 27,192.67         |
| 336                         | 6,244.40          | 6,138.06          | 5,992.58          | 6,628.49          | 25,003.55         |
| 337                         | 4,751.40          | 4,793.11          | 4,595.90          | 5,060.69          | 19,201.10         |
| 338                         | 5,986.80          | 5,465.36          | 5,241.05          | 5,472.87          | 22,166.09         |
| 339                         | 4,990.74          | 4,705.73          | 4,577.97          | 5,021.38          | 19,295.82         |
| 341                         | 2,316.45          | 2,018.73          | 1,908.89          | 2,204.30          | 8,448.35          |
| 342                         | 5,885.64          | 5,575.20          | 5,413.91          | 5,874.65          | 22,749.39         |
| 344                         | 2,643.65          | 2,365.59          | 2,308.35          | 2,607.23          | 9,924.82          |
| 346                         | 4,158.27          | 3,933.39          | 3,824.71          | 4,372.17          | 16,288.55         |
| 347                         | 5,015.02          | 4,873.38          | 4,673.36          | 5,349.16          | 19,910.92         |
| 349                         | 2,556.94          | 2,597.98          | 2,630.93          | 2,877.78          | 10,663.63         |
| <b>FL - FLORIDA - Total</b> | <b>138,767.77</b> | <b>133,537.99</b> | <b>128,723.45</b> | <b>140,070.45</b> | <b>541,099.66</b> |

**STATE: GA - GEORGIA**

| REGISTRANT ZIP CODE 3       | 1ST QUARTER       | 2ND QUARTER      | 3RD QUARTER      | 4TH QUARTER      | TOTAL GRAMS       |
|-----------------------------|-------------------|------------------|------------------|------------------|-------------------|
| 300                         | 23,932.76         | 22,753.47        | 22,634.73        | 23,617.12        | 92,938.07         |
| 301                         | 11,636.57         | 11,250.98        | 11,286.25        | 11,764.34        | 45,938.14         |
| 302                         | 7,607.22          | 7,115.25         | 7,169.60         | 7,328.00         | 29,220.06         |
| 303                         | 12,166.69         | 12,228.55        | 12,432.04        | 12,444.76        | 49,272.04         |
| 304                         | 2,851.19          | 2,733.83         | 2,722.27         | 2,865.64         | 11,172.94         |
| 305                         | 6,478.19          | 5,940.56         | 6,033.05         | 6,227.87         | 24,679.67         |
| 306                         | 5,285.57          | 4,836.96         | 4,856.62         | 5,191.34         | 20,170.49         |
| 307                         | 2,432.07          | 2,374.83         | 2,278.29         | 2,406.05         | 9,491.25          |
| 308                         | 2,044.74          | 1,899.64         | 1,940.68         | 1,985.77         | 7,870.83          |
| 309                         | 2,918.25          | 2,755.80         | 2,978.95         | 2,806.68         | 11,459.68         |
| 310                         | 5,071.09          | 4,642.72         | 4,761.81         | 4,757.76         | 19,233.39         |
| 312                         | 2,064.97          | 2,241.87         | 2,152.84         | 2,247.65         | 8,707.34          |
| 313                         | 2,537.28          | 2,300.26         | 2,528.61         | 2,452.88         | 9,819.03          |
| 314                         | 3,060.46          | 3,081.27         | 3,007.85         | 3,048.90         | 12,198.49         |
| 315                         | 3,385.93          | 2,822.28         | 2,918.25         | 2,921.72         | 12,048.18         |
| 316                         | 1,418.66          | 1,304.19         | 1,350.44         | 1,478.78         | 5,552.07          |
| 317                         | 2,893.97          | 2,664.46         | 2,826.91         | 2,880.67         | 11,266.01         |
| 318                         | 229.51            | 237.60           | 269.39           | 226.62           | 963.11            |
| 319                         | 2,160.94          | 1,993.29         | 2,245.92         | 1,973.06         | 8,373.20          |
| 398                         | 412.76            | 413.34           | 349.75           | 375.77           | 1,551.62          |
| <b>GA - GEORGIA - Total</b> | <b>100,588.82</b> | <b>95,591.18</b> | <b>96,744.25</b> | <b>99,001.36</b> | <b>391,925.61</b> |

**STATE: GU - GUAM**

| REGISTRANT ZIP CODE 3 | 1ST QUARTER | 2ND QUARTER | 3RD QUARTER | 4TH QUARTER | TOTAL GRAMS |
|-----------------------|-------------|-------------|-------------|-------------|-------------|
| 969                   | 9.25        | 18.50       | 8.67        | 7.52        | 43.94       |

|                          |             |              |             |             |              |
|--------------------------|-------------|--------------|-------------|-------------|--------------|
| <b>GU - GUAM - Total</b> | <b>9.25</b> | <b>18.50</b> | <b>8.67</b> | <b>7.52</b> | <b>43.94</b> |
|--------------------------|-------------|--------------|-------------|-------------|--------------|

**STATE: HI - HAWAII**

| REGISTRANT ZIP CODE 3      | 1ST QUARTER     | 2ND QUARTER     | 3RD QUARTER     | 4TH QUARTER     | TOTAL GRAMS     |
|----------------------------|-----------------|-----------------|-----------------|-----------------|-----------------|
| 967                        | 704.13          | 744.01          | 761.94          | 842.87          | 3,052.95        |
| 968                        | 748.06          | 838.25          | 811.07          | 664.82          | 3,062.20        |
| <b>HI - HAWAII - Total</b> | <b>1,452.19</b> | <b>1,582.26</b> | <b>1,573.01</b> | <b>1,507.68</b> | <b>6,115.14</b> |

**STATE: IA - IOWA**

| REGISTRANT ZIP CODE 3    | 1ST QUARTER      | 2ND QUARTER      | 3RD QUARTER      | 4TH QUARTER      | TOTAL GRAMS       |
|--------------------------|------------------|------------------|------------------|------------------|-------------------|
| 500                      | 2,486.41         | 2,458.08         | 2,364.43         | 2,561.56         | 9,870.48          |
| 501                      | 1,418.08         | 1,405.94         | 1,418.66         | 1,425.59         | 5,668.27          |
| 502                      | 1,623.30         | 1,549.31         | 1,561.45         | 1,650.48         | 6,384.54          |
| 503                      | 2,686.43         | 2,780.08         | 2,587.58         | 2,981.26         | 11,035.35         |
| 504                      | 938.26           | 861.37           | 849.81           | 884.49           | 3,533.93          |
| 505                      | 1,499.59         | 1,545.84         | 1,365.47         | 1,519.82         | 5,930.73          |
| 506                      | 1,465.48         | 1,436.58         | 1,369.52         | 1,420.39         | 5,691.97          |
| 507                      | 1,159.09         | 1,190.89         | 1,103.59         | 1,227.88         | 4,681.45          |
| 508                      | 169.38           | 193.09           | 198.87           | 167.07           | 728.41            |
| 510                      | 1,114.58         | 1,067.75         | 1,052.14         | 1,053.30         | 4,287.77          |
| 511                      | 2,655.21         | 2,644.23         | 2,583.53         | 2,715.91         | 10,598.89         |
| 512                      | 397.73           | 435.89           | 396.00           | 416.81           | 1,646.43          |
| 513                      | 593.71           | 623.19           | 616.25           | 663.08           | 2,496.24          |
| 514                      | 369.41           | 348.02           | 314.49           | 323.74           | 1,355.64          |
| 515                      | 1,786.33         | 1,842.98         | 1,730.25         | 1,810.03         | 7,169.60          |
| 516                      | 184.41           | 201.18           | 210.43           | 186.73           | 782.75            |
| 520                      | 1,730.83         | 1,679.38         | 1,632.55         | 1,744.13         | 6,786.89          |
| 521                      | 234.71           | 204.07           | 204.65           | 193.09           | 836.51            |
| 522                      | 2,409.52         | 2,414.72         | 2,266.15         | 2,415.30         | 9,505.70          |
| 523                      | 1,815.81         | 1,745.28         | 1,700.19         | 1,803.67         | 7,064.96          |
| 524                      | 2,466.17         | 2,293.90         | 2,266.15         | 2,460.97         | 9,487.20          |
| 525                      | 1,184.53         | 1,063.70         | 1,104.17         | 1,080.47         | 4,432.87          |
| 526                      | 1,174.70         | 1,116.31         | 1,163.14         | 1,142.90         | 4,597.05          |
| 527                      | 1,642.38         | 1,659.73         | 1,609.43         | 1,627.93         | 6,539.47          |
| 528                      | 1,431.38         | 1,453.92         | 1,393.80         | 1,453.92         | 5,733.02          |
| <b>IA - IOWA - Total</b> | <b>34,637.44</b> | <b>34,215.43</b> | <b>33,062.70</b> | <b>34,930.54</b> | <b>136,846.10</b> |

**STATE: ID - IDAHO**

| REGISTRANT ZIP CODE 3 | 1ST QUARTER | 2ND QUARTER | 3RD QUARTER | 4TH QUARTER | TOTAL GRAMS |
|-----------------------|-------------|-------------|-------------|-------------|-------------|
| 832                   | 608.74      | 634.75      | 561.91      | 659.61      | 2,465.02    |
| 833                   | 815.12      | 781.01      | 740.55      | 842.87      | 3,179.55    |
| 834                   | 1,545.84    | 1,607.70    | 1,586.88    | 1,711.18    | 6,451.60    |
| 835                   | 140.48      | 169.96      | 138.17      | 152.62      | 601.22      |

|                           |                 |                 |                 |                  |                  |
|---------------------------|-----------------|-----------------|-----------------|------------------|------------------|
| 836                       | 3,257.59        | 3,188.80        | 3,137.93        | 3,303.26         | <b>12,887.58</b> |
| 837                       | 2,193.31        | 2,173.66        | 2,165.56        | 2,308.93         | <b>8,841.46</b>  |
| 838                       | 1,090.87        | 1,040.00        | 998.38          | 1,033.64         | <b>4,162.90</b>  |
| <b>ID - IDAHO - Total</b> | <b>9,651.96</b> | <b>9,595.88</b> | <b>9,329.38</b> | <b>10,012.11</b> | <b>38,589.33</b> |

**STATE: IL - ILLINOIS**

| REGISTRANT ZIP CODE 3        | 1ST QUARTER      | 2ND QUARTER      | 3RD QUARTER      | 4TH QUARTER      | TOTAL GRAMS       |
|------------------------------|------------------|------------------|------------------|------------------|-------------------|
| 600                          | 15,571.70        | 16,008.75        | 15,456.66        | 16,055.57        | <b>63,092.68</b>  |
| 601                          | 9,777.41         | 9,827.70         | 9,554.84         | 10,250.29        | <b>39,410.23</b>  |
| 602                          | 813.96           | 768.29           | 717.42           | 815.12           | <b>3,114.80</b>   |
| 603                          | 672.33           | 672.91           | 660.77           | 718.58           | <b>2,724.59</b>   |
| 604                          | 7,234.34         | 7,055.13         | 7,264.40         | 7,610.69         | <b>29,164.57</b>  |
| 605                          | 8,873.84         | 8,696.94         | 8,869.79         | 9,223.59         | <b>35,664.15</b>  |
| 606                          | 10,664.21        | 11,380.48        | 11,191.44        | 11,872.44        | <b>45,108.56</b>  |
| 607                          | 667.13           | 687.36           | 655.57           | 623.77           | <b>2,633.82</b>   |
| 608                          | 150.31           | 178.05           | 178.63           | 166.49           | <b>673.49</b>     |
| 609                          | 1,034.80         | 1,101.28         | 1,015.72         | 1,069.49         | <b>4,221.29</b>   |
| 610                          | 1,000.69         | 934.21           | 900.68           | 937.68           | <b>3,773.26</b>   |
| 611                          | 1,005.32         | 944.62           | 1,026.13         | 960.22           | <b>3,936.28</b>   |
| 612                          | 622.61           | 667.71           | 639.38           | 689.10           | <b>2,618.79</b>   |
| 613                          | 687.94           | 635.91           | 592.55           | 639.96           | <b>2,556.36</b>   |
| 614                          | 765.40           | 709.91           | 671.17           | 774.08           | <b>2,920.56</b>   |
| 615                          | 677.53           | 635.91           | 672.33           | 667.71           | <b>2,653.48</b>   |
| 616                          | 1,162.56         | 1,104.75         | 1,197.25         | 1,253.90         | <b>4,718.45</b>   |
| 617                          | 1,514.04         | 1,351.60         | 1,398.42         | 1,483.40         | <b>5,747.47</b>   |
| 618                          | 1,430.80         | 1,245.81         | 1,347.55         | 1,490.92         | <b>5,515.07</b>   |
| 619                          | 285.58           | 216.21           | 242.22           | 296.57           | <b>1,040.58</b>   |
| 620                          | 1,004.16         | 1,030.75         | 969.47           | 1,103.59         | <b>4,107.98</b>   |
| 622                          | 1,815.23         | 1,819.28         | 1,899.06         | 1,921.60         | <b>7,455.18</b>   |
| 623                          | 799.51           | 898.95           | 776.39           | 793.73           | <b>3,268.58</b>   |
| 624                          | 306.97           | 281.53           | 265.93           | 256.10           | <b>1,110.53</b>   |
| 625                          | 479.24           | 459.59           | 501.21           | 432.42           | <b>1,872.47</b>   |
| 626                          | 348.02           | 376.92           | 315.64           | 387.91           | <b>1,428.49</b>   |
| 627                          | 682.74           | 709.33           | 690.25           | 715.11           | <b>2,797.43</b>   |
| 628                          | 389.06           | 434.15           | 397.15           | 398.31           | <b>1,618.68</b>   |
| 629                          | 1,006.47         | 1,023.82         | 1,041.74         | 1,047.52         | <b>4,119.54</b>   |
| <b>IL - ILLINOIS - Total</b> | <b>71,443.91</b> | <b>71,857.83</b> | <b>71,109.77</b> | <b>74,655.83</b> | <b>289,067.34</b> |

**STATE: IN - INDIANA**

| REGISTRANT ZIP CODE 3 | 1ST QUARTER | 2ND QUARTER | 3RD QUARTER | 4TH QUARTER | TOTAL GRAMS      |
|-----------------------|-------------|-------------|-------------|-------------|------------------|
| 460                   | 10,455.52   | 9,806.89    | 10,070.50   | 10,389.61   | <b>40,722.52</b> |
| 461                   | 6,592.07    | 6,464.89    | 6,904.25    | 6,986.34    | <b>26,947.55</b> |

|                             |                  |                  |                  |                  |                   |
|-----------------------------|------------------|------------------|------------------|------------------|-------------------|
| 462                         | 9,542.70         | 8,877.88         | 8,823.54         | 8,879.04         | 36,123.16         |
| 463                         | 8,335.05         | 8,065.65         | 8,158.15         | 8,614.27         | 33,173.11         |
| 464                         | 681.00           | 704.13           | 611.63           | 666.55           | 2,663.31          |
| 465                         | 8,021.72         | 7,606.64         | 7,420.49         | 8,004.95         | 31,053.80         |
| 466                         | 2,430.33         | 2,581.79         | 2,381.19         | 2,447.68         | 9,841.00          |
| 467                         | 2,745.40         | 2,543.06         | 2,485.25         | 2,644.81         | 10,418.52         |
| 468                         | 3,607.34         | 3,565.72         | 3,465.13         | 3,907.38         | 14,545.57         |
| 469                         | 6,466.63         | 6,277.59         | 6,079.30         | 6,050.97         | 24,874.49         |
| 470                         | 711.64           | 664.24           | 678.69           | 665.39           | 2,719.96          |
| 471                         | 5,227.76         | 4,868.76         | 4,227.07         | 4,219.55         | 18,543.14         |
| 472                         | 1,446.98         | 1,494.39         | 1,405.94         | 1,495.54         | 5,842.86          |
| 473                         | 3,387.67         | 3,114.80         | 3,244.30         | 3,398.65         | 13,145.42         |
| 474                         | 2,832.69         | 2,678.92         | 2,507.22         | 2,870.27         | 10,889.09         |
| 475                         | 1,685.74         | 1,515.78         | 1,593.24         | 1,687.47         | 6,482.24          |
| 476                         | 2,160.94         | 2,114.69         | 2,288.70         | 2,310.67         | 8,874.99          |
| 477                         | 4,933.51         | 4,742.15         | 4,858.93         | 4,822.51         | 19,357.10         |
| 478                         | 1,290.90         | 1,177.01         | 1,165.45         | 1,214.01         | 4,847.37          |
| 479                         | 3,284.76         | 3,074.34         | 3,132.15         | 3,406.74         | 12,897.99         |
| <b>IN - INDIANA - Total</b> | <b>85,840.33</b> | <b>81,939.32</b> | <b>81,501.12</b> | <b>84,682.40</b> | <b>333,963.17</b> |

**STATE: KS - KANSAS**

| REGISTRANT ZIP CODE 3 | 1ST QUARTER | 2ND QUARTER | 3RD QUARTER | 4TH QUARTER | TOTAL GRAMS |
|-----------------------|-------------|-------------|-------------|-------------|-------------|
| 660                   | 7,129.71    | 7,090.40    | 7,040.10    | 7,426.85    | 28,687.06   |
| 661                   | 875.82      | 898.37      | 810.50      | 973.52      | 3,558.21    |
| 662                   | 7,525.71    | 7,585.83    | 7,643.64    | 7,906.10    | 30,661.27   |
| 664                   | 528.38      | 516.82      | 522.02      | 430.68      | 1,997.91    |
| 665                   | 864.84      | 870.62      | 860.21      | 938.83      | 3,534.50    |
| 666                   | 3,553.00    | 3,548.38    | 3,496.35    | 3,824.71    | 14,422.44   |
| 667                   | 1,161.98    | 1,129.03    | 1,128.45    | 1,178.75    | 4,598.21    |
| 668                   | 492.54      | 472.31      | 511.62      | 485.03      | 1,961.49    |
| 669                   | 102.90      | 127.76      | 85.56       | 129.49      | 445.72      |
| 670                   | 1,591.51    | 1,651.05    | 1,570.70    | 1,657.41    | 6,470.67    |
| 671                   | 583.30      | 534.74      | 539.37      | 590.82      | 2,248.23    |
| 672                   | 3,841.47    | 3,975.02    | 3,728.17    | 4,104.51    | 15,649.17   |
| 673                   | 565.38      | 557.29      | 556.13      | 598.33      | 2,277.14    |
| 674                   | 918.60      | 904.15      | 885.07      | 933.05      | 3,640.87    |
| 675                   | 842.87      | 845.76      | 761.36      | 838.82      | 3,288.81    |
| 676                   | 539.37      | 563.65      | 492.54      | 545.15      | 2,140.70    |
| 677                   | 123.14      | 146.84      | 114.46      | 112.73      | 497.17      |
| 678                   | 329.52      | 326.63      | 298.88      | 320.85      | 1,275.87    |
| 679                   | 112.73      | 119.09      | 121.40      | 143.95      | 497.17      |

|                            |                  |                  |                  |                  |                   |
|----------------------------|------------------|------------------|------------------|------------------|-------------------|
| <b>KS - KANSAS - Total</b> | <b>31,682.77</b> | <b>31,863.72</b> | <b>31,166.53</b> | <b>33,139.58</b> | <b>127,852.60</b> |
|----------------------------|------------------|------------------|------------------|------------------|-------------------|

**STATE: KY - KENTUCKY**

| REGISTRANT ZIP CODE 3        | 1ST QUARTER      | 2ND QUARTER      | 3RD QUARTER      | 4TH QUARTER      | TOTAL GRAMS       |
|------------------------------|------------------|------------------|------------------|------------------|-------------------|
| 400                          | 3,186.49         | 3,041.38         | 3,035.60         | 3,217.13         | 12,480.60         |
| 401                          | 931.90           | 812.81           | 1,123.83         | 820.32           | 3,688.86          |
| 402                          | 10,132.36        | 9,492.40         | 9,549.63         | 9,819.61         | 38,994.00         |
| 403                          | 2,426.29         | 2,511.27         | 2,502.59         | 2,616.48         | 10,056.63         |
| 404                          | 1,123.83         | 1,015.72         | 976.99           | 1,036.53         | 4,153.07          |
| 405                          | 3,922.99         | 3,817.77         | 3,749.79         | 4,107.95         | 15,598.49         |
| 406                          | 447.45           | 508.73           | 406.40           | 426.64           | 1,789.22          |
| 407                          | 345.70           | 311.60           | 323.16           | 316.80           | 1,297.26          |
| 408                          | 100.59           | 100.59           | 65.90            | 93.07            | 360.16            |
| 409                          | 115.04           | 131.23           | 109.26           | 115.62           | 471.15            |
| 410                          | 4,387.78         | 4,315.52         | 4,066.93         | 4,431.71         | 17,201.94         |
| 411                          | 631.29           | 704.13           | 599.49           | 646.89           | 2,581.79          |
| 412                          | 249.16           | 204.07           | 217.94           | 198.87           | 870.04            |
| 413                          | 50.87            | 67.06            | 51.45            | 56.65            | 226.04            |
| 414                          | 96.54            | 86.72            | 69.95            | 82.67            | 335.88            |
| 415                          | 479.24           | 373.45           | 426.06           | 433.58           | 1,712.33          |
| 416                          | 219.10           | 251.47           | 221.99           | 240.49           | 933.05            |
| 417                          | 215.63           | 199.44           | 229.51           | 233.55           | 878.13            |
| 418                          | 46.83            | 39.31            | 37.00            | 54.34            | 177.48            |
| 420                          | 4,160.01         | 3,884.83         | 3,801.59         | 3,827.60         | 15,674.03         |
| 421                          | 1,538.32         | 1,616.95         | 1,574.74         | 1,636.60         | 6,366.62          |
| 422                          | 873.51           | 798.93           | 1,131.34         | 668.86           | 3,472.65          |
| 423                          | 1,950.51         | 1,848.19         | 1,838.36         | 1,847.03         | 7,484.08          |
| 424                          | 2,615.32         | 2,481.78         | 2,408.36         | 2,345.93         | 9,851.40          |
| 425                          | 319.11           | 302.92           | 298.88           | 335.30           | 1,256.21          |
| 426                          | 111.57           | 120.24           | 115.62           | 143.95           | 491.39            |
| 427                          | 1,429.06         | 1,359.11         | 1,298.41         | 1,312.29         | 5,398.88          |
| <b>KY - KENTUCKY - Total</b> | <b>42,106.49</b> | <b>40,397.62</b> | <b>40,230.79</b> | <b>41,066.46</b> | <b>163,801.36</b> |

**STATE: LA - LOUISIANA**

| REGISTRANT ZIP CODE 3 | 1ST QUARTER | 2ND QUARTER | 3RD QUARTER | 4TH QUARTER | TOTAL GRAMS |
|-----------------------|-------------|-------------|-------------|-------------|-------------|
| 700                   | 8,327.53    | 7,815.91    | 8,112.48    | 8,214.80    | 32,470.72   |
| 701                   | 4,692.44    | 4,465.82    | 4,286.61    | 4,571.04    | 18,015.91   |
| 703                   | 4,992.47    | 4,915.01    | 4,839.85    | 5,051.44    | 19,798.77   |
| 704                   | 9,175.03    | 8,759.95    | 8,568.02    | 9,038.59    | 35,541.59   |
| 705                   | 17,143.56   | 16,693.79   | 16,598.41   | 17,023.89   | 67,459.65   |
| 706                   | 8,944.05    | 8,778.19    | 8,574.38    | 8,966.33    | 35,262.94   |
| 707                   | 11,962.05   | 11,451.58   | 11,652.18   | 12,096.74   | 47,162.55   |

|                               |                  |                  |                  |                  |                   |
|-------------------------------|------------------|------------------|------------------|------------------|-------------------|
| 708                           | 8,714.86         | 8,592.88         | 8,180.69         | 8,485.93         | 33,974.36         |
| 710                           | 1,988.09         | 1,956.87         | 2,017.57         | 2,069.02         | 8,031.54          |
| 711                           | 6,176.42         | 5,634.16         | 5,895.46         | 5,835.34         | 23,541.39         |
| 712                           | 3,889.46         | 3,498.08         | 3,671.51         | 3,906.22         | 14,965.27         |
| 713                           | 3,371.48         | 3,272.62         | 3,363.39         | 3,498.66         | 13,506.15         |
| 714                           | 1,599.02         | 1,602.49         | 1,654.52         | 1,656.83         | 6,512.87          |
| <b>LA - LOUISIANA - Total</b> | <b>90,976.44</b> | <b>87,437.36</b> | <b>87,415.08</b> | <b>90,414.84</b> | <b>356,243.72</b> |

**STATE: MA - MASSACHUSETTS**

| REGISTRANT ZIP CODE 3             | 1ST QUARTER      | 2ND QUARTER      | 3RD QUARTER      | 4TH QUARTER      | TOTAL GRAMS       |
|-----------------------------------|------------------|------------------|------------------|------------------|-------------------|
| 010                               | 1,866.11         | 1,930.28         | 1,782.28         | 1,915.82         | 7,494.49          |
| 011                               | 631.86           | 700.66           | 661.92           | 749.80           | 2,744.24          |
| 012                               | 586.19           | 639.96           | 602.96           | 572.90           | 2,402.01          |
| 013                               | 391.37           | 448.61           | 434.73           | 487.34           | 1,762.05          |
| 014                               | 1,334.83         | 1,355.64         | 1,357.96         | 1,534.28         | 5,582.71          |
| 015                               | 1,592.09         | 1,619.84         | 1,571.85         | 1,678.22         | 6,462.00          |
| 016                               | 918.02           | 943.46           | 881.02           | 961.38           | 3,703.89          |
| 017                               | 2,731.52         | 2,751.76         | 2,606.07         | 2,745.40         | 10,834.75         |
| 018                               | 4,398.18         | 4,374.48         | 4,177.93         | 4,746.78         | 17,697.38         |
| 019                               | 3,903.33         | 3,881.94         | 3,747.24         | 4,082.54         | 15,615.06         |
| 020                               | 3,166.25         | 3,190.53         | 3,028.67         | 3,394.60         | 12,780.06         |
| 021                               | 5,732.44         | 6,153.87         | 5,737.64         | 6,430.78         | 24,054.74         |
| 022                               | 347.44           | 366.52           | 345.13           | 482.71           | 1,541.79          |
| 023                               | 2,517.63         | 2,580.06         | 2,435.54         | 2,619.95         | 10,153.17         |
| 024                               | 2,725.74         | 2,822.86         | 2,749.44         | 2,974.90         | 11,272.95         |
| 025                               | 763.09           | 765.40           | 812.81           | 763.67           | 3,104.98          |
| 026                               | 884.49           | 835.35           | 981.61           | 902.99           | 3,604.45          |
| 027                               | 2,344.77         | 2,406.05         | 2,290.43         | 2,603.18         | 9,644.44          |
| <b>MA - MASSACHUSETTS - Total</b> | <b>36,835.38</b> | <b>37,767.27</b> | <b>36,205.25</b> | <b>39,647.25</b> | <b>150,455.15</b> |

**STATE: MD - MARYLAND**

| REGISTRANT ZIP CODE 3 | 1ST QUARTER | 2ND QUARTER | 3RD QUARTER | 4TH QUARTER | TOTAL GRAMS |
|-----------------------|-------------|-------------|-------------|-------------|-------------|
| 206                   | 3,132.72    | 3,211.35    | 2,945.42    | 3,304.42    | 12,593.91   |
| 207                   | 3,967.50    | 3,895.82    | 3,785.98    | 3,855.35    | 15,504.64   |
| 208                   | 7,833.26    | 8,035.59    | 7,703.76    | 8,004.95    | 31,577.56   |
| 209                   | 1,512.31    | 1,412.88    | 1,364.89    | 1,578.21    | 5,868.29    |
| 210                   | 10,180.34   | 10,679.82   | 10,020.79   | 10,871.17   | 41,752.12   |
| 211                   | 4,940.44    | 5,058.95    | 4,808.06    | 5,256.66    | 20,064.12   |
| 212                   | 9,496.28    | 9,743.79    | 8,845.42    | 9,915.57    | 38,001.06   |
| 214                   | 1,563.18    | 1,535.43    | 1,517.51    | 1,625.62    | 6,241.75    |
| 215                   | 1,996.18    | 1,957.45    | 1,819.28    | 1,884.61    | 7,657.51    |
| 216                   | 2,382.35    | 2,341.31    | 2,225.69    | 2,315.87    | 9,265.21    |

|                              |                  |                  |                  |                  |                   |
|------------------------------|------------------|------------------|------------------|------------------|-------------------|
| 217                          | 5,805.28         | 5,751.52         | 5,757.88         | 6,149.25         | 23,463.92         |
| 218                          | 2,289.28         | 2,317.60         | 2,082.32         | 2,407.21         | 9,096.40          |
| 219                          | 1,396.69         | 1,365.47         | 1,263.73         | 1,322.11         | 5,348.00          |
| <b>MD - MARYLAND - Total</b> | <b>56,495.81</b> | <b>57,306.97</b> | <b>54,140.71</b> | <b>58,491.00</b> | <b>226,434.49</b> |

**STATE: ME - MAINE**

| REGISTRANT ZIP CODE 3     | 1ST QUARTER      | 2ND QUARTER      | 3RD QUARTER      | 4TH QUARTER      | TOTAL GRAMS      |
|---------------------------|------------------|------------------|------------------|------------------|------------------|
| 039                       | 617.41           | 588.51           | 605.85           | 541.68           | 2,353.45         |
| 040                       | 5,637.05         | 5,586.76         | 5,439.34         | 5,586.18         | 22,249.33        |
| 041                       | 2,021.62         | 1,977.10         | 2,104.86         | 2,130.88         | 8,234.46         |
| 042                       | 1,830.26         | 1,928.54         | 1,839.51         | 1,918.71         | 7,517.03         |
| 043                       | 837.09           | 812.23           | 819.75           | 796.62           | 3,265.69         |
| 044                       | 1,871.89         | 1,808.30         | 1,751.06         | 1,823.33         | 7,254.58         |
| 045                       | 360.73           | 364.78           | 381.55           | 360.73           | 1,467.80         |
| 046                       | 826.10           | 839.98           | 723.78           | 771.19           | 3,161.05         |
| 047                       | 951.55           | 930.74           | 827.26           | 839.40           | 3,548.96         |
| 048                       | 319.69           | 315.64           | 341.66           | 304.08           | 1,281.07         |
| 049                       | 1,635.44         | 1,692.68         | 1,603.65         | 1,722.74         | 6,654.51         |
| <b>ME - MAINE - Total</b> | <b>16,908.85</b> | <b>16,845.26</b> | <b>16,438.27</b> | <b>16,795.54</b> | <b>66,987.92</b> |

**STATE: MI - MICHIGAN**

| REGISTRANT ZIP CODE 3 | 1ST QUARTER | 2ND QUARTER | 3RD QUARTER | 4TH QUARTER | TOTAL GRAMS |
|-----------------------|-------------|-------------|-------------|-------------|-------------|
| 480                   | 7,748.85    | 7,669.65    | 7,444.77    | 8,035.01    | 30,898.29   |
| 481                   | 7,390.43    | 7,041.26    | 6,869.56    | 7,885.86    | 29,187.11   |
| 482                   | 1,646.43    | 1,579.95    | 1,536.59    | 1,680.54    | 6,443.50    |
| 483                   | 6,563.17    | 6,979.03    | 6,638.90    | 7,614.16    | 27,795.25   |
| 484                   | 1,986.35    | 1,891.54    | 1,856.86    | 1,990.40    | 7,725.15    |
| 485                   | 802.40      | 807.61      | 759.05      | 875.24      | 3,244.30    |
| 486                   | 2,617.64    | 2,500.86    | 2,375.99    | 2,580.06    | 10,074.55   |
| 487                   | 1,098.39    | 1,049.83    | 993.75      | 1,113.42    | 4,255.39    |
| 488                   | 4,840.43    | 4,768.17    | 4,441.54    | 4,972.82    | 19,022.96   |
| 489                   | 1,217.48    | 1,166.61    | 1,048.67    | 1,203.60    | 4,636.36    |
| 490                   | 6,059.64    | 5,694.29    | 5,549.18    | 5,955.59    | 23,258.70   |
| 491                   | 901.26      | 839.98      | 802.98      | 905.88      | 3,450.10    |
| 492                   | 1,577.06    | 1,493.23    | 1,445.25    | 1,522.72    | 6,038.25    |
| 493                   | 1,981.73    | 1,848.76    | 1,853.39    | 2,016.41    | 7,700.29    |
| 494                   | 5,408.70    | 5,401.19    | 5,080.92    | 5,601.21    | 21,492.02   |
| 495                   | 4,251.35    | 4,144.40    | 4,241.52    | 4,338.06    | 16,975.33   |
| 496                   | 2,604.92    | 2,628.62    | 2,521.09    | 2,544.80    | 10,299.43   |
| 497                   | 1,406.52    | 1,441.78    | 1,443.52    | 1,500.75    | 5,792.56    |
| 498                   | 1,198.40    | 1,235.40    | 1,208.23    | 1,238.29    | 4,880.32    |
| 499                   | 442.82      | 376.34      | 397.73      | 416.81      | 1,633.71    |



|                              |                  |                  |                  |                  |                   |
|------------------------------|------------------|------------------|------------------|------------------|-------------------|
| <b>MI - MICHIGAN - Total</b> | <b>61,743.97</b> | <b>60,558.49</b> | <b>58,509.50</b> | <b>63,991.62</b> | <b>244,803.58</b> |
|------------------------------|------------------|------------------|------------------|------------------|-------------------|

**STATE: MN - MINNESOTA**

| REGISTRANT ZIP CODE 3         | 1ST QUARTER      | 2ND QUARTER      | 3RD QUARTER      | 4TH QUARTER      | TOTAL GRAMS       |
|-------------------------------|------------------|------------------|------------------|------------------|-------------------|
| 550                           | 2,778.35         | 2,871.42         | 2,860.44         | 2,913.05         | 11,423.26         |
| 551                           | 4,129.95         | 4,088.32         | 3,979.06         | 4,275.63         | 16,472.96         |
| 553                           | 5,911.65         | 5,868.87         | 5,734.17         | 6,261.98         | 23,776.67         |
| 554                           | 5,977.55         | 6,118.61         | 5,811.06         | 6,377.60         | 24,284.82         |
| 556                           | 20.81            | 16.76            | 28.33            | 19.08            | 84.98             |
| 557                           | 980.46           | 1,018.03         | 969.47           | 1,082.78         | 4,050.75          |
| 558                           | 354.38           | 372.87           | 453.81           | 431.26           | 1,612.32          |
| 559                           | 1,309.40         | 1,233.09         | 1,221.53         | 1,290.90         | 5,054.91          |
| 560                           | 2,981.26         | 2,887.03         | 2,915.94         | 3,083.59         | 11,867.81         |
| 561                           | 584.46           | 650.94           | 624.35           | 631.29           | 2,491.03          |
| 562                           | 685.05           | 674.64           | 689.67           | 744.01           | 2,793.38          |
| 563                           | 1,412.88         | 1,351.02         | 1,377.61         | 1,492.65         | 5,634.16          |
| 564                           | 874.09           | 882.76           | 898.37           | 923.80           | 3,579.02          |
| 565                           | 1,381.08         | 1,366.63         | 1,355.64         | 1,487.45         | 5,590.81          |
| 566                           | 922.65           | 950.97           | 786.22           | 859.06           | 3,518.89          |
| 567                           | 550.35           | 517.40           | 476.35           | 481.56           | 2,025.66          |
| <b>MN - MINNESOTA - Total</b> | <b>30,854.35</b> | <b>30,869.38</b> | <b>30,182.02</b> | <b>32,355.68</b> | <b>124,261.44</b> |

**STATE: MO - MISSOURI**

| REGISTRANT ZIP CODE 3 | 1ST QUARTER | 2ND QUARTER | 3RD QUARTER | 4TH QUARTER | TOTAL GRAMS |
|-----------------------|-------------|-------------|-------------|-------------|-------------|
| 630                   | 7,501.43    | 7,195.03    | 7,375.40    | 7,377.71    | 29,449.57   |
| 631                   | 20,940.52   | 19,155.75   | 18,950.70   | 30,397.08   | 89,444.04   |
| 633                   | 7,301.40    | 7,100.80    | 7,068.43    | 7,502.58    | 28,973.22   |
| 634                   | 523.76      | 523.18      | 545.15      | 565.38      | 2,157.47    |
| 635                   | 550.93      | 546.88      | 493.12      | 527.23      | 2,118.16    |
| 636                   | 830.15      | 799.51      | 787.95      | 831.31      | 3,248.92    |
| 637                   | 544.57      | 478.09      | 449.76      | 566.54      | 2,038.96    |
| 638                   | 906.46      | 993.75      | 1,077.00    | 1,070.06    | 4,047.28    |
| 639                   | 423.75      | 396.00      | 374.61      | 393.69      | 1,588.04    |
| 640                   | 5,798.34    | 5,698.33    | 5,497.15    | 6,104.74    | 23,098.56   |
| 641                   | 8,314.81    | 8,499.80    | 8,336.78    | 8,655.89    | 33,807.29   |
| 644                   | 398.31      | 379.23      | 375.19      | 389.06      | 1,541.79    |
| 645                   | 1,178.17    | 1,180.48    | 1,012.83    | 1,122.67    | 4,494.15    |
| 646                   | 220.26      | 197.71      | 213.90      | 215.63      | 847.49      |
| 647                   | 642.27      | 691.99      | 619.72      | 673.49      | 2,627.46    |
| 648                   | 1,112.26    | 1,039.42    | 1,025.55    | 1,059.08    | 4,236.32    |
| 650                   | 513.35      | 482.14      | 477.51      | 546.30      | 2,019.30    |
| 651                   | 738.81      | 711.64      | 745.17      | 742.86      | 2,938.48    |

|                              |                  |                  |                  |                  |                   |
|------------------------------|------------------|------------------|------------------|------------------|-------------------|
| 652                          | 2,192.16         | 2,085.21         | 2,175.39         | 2,348.82         | 8,801.57          |
| 653                          | 445.14           | 429.53           | 464.21           | 442.82           | 1,781.70          |
| 654                          | 411.03           | 481.56           | 417.97           | 401.78           | 1,712.33          |
| 655                          | 601.80           | 566.54           | 576.37           | 600.65           | 2,345.35          |
| 656                          | 675.22           | 690.25           | 731.87           | 768.87           | 2,866.22          |
| 657                          | 1,185.11         | 1,193.20         | 1,230.20         | 1,205.92         | 4,814.42          |
| 658                          | 1,855.12         | 1,753.38         | 1,816.39         | 1,860.33         | 7,285.22          |
| <b>MO - MISSOURI - Total</b> | <b>65,805.12</b> | <b>63,269.40</b> | <b>62,838.31</b> | <b>76,370.48</b> | <b>268,283.32</b> |

**STATE: MS - MISSISSIPPI**

| REGISTRANT ZIP CODE 3           | 1ST QUARTER      | 2ND QUARTER      | 3RD QUARTER      | 4TH QUARTER      | TOTAL GRAMS       |
|---------------------------------|------------------|------------------|------------------|------------------|-------------------|
| 386                             | 6,958.01         | 6,383.38         | 6,116.88         | 6,287.42         | 25,745.68         |
| 387                             | 556.13           | 563.07           | 537.63           | 513.35           | 2,170.19          |
| 388                             | 2,904.37         | 2,678.92         | 2,692.79         | 2,808.99         | 11,085.07         |
| 389                             | 826.10           | 833.04           | 753.26           | 791.42           | 3,203.83          |
| 390                             | 2,888.19         | 2,602.03         | 2,633.25         | 2,780.66         | 10,904.12         |
| 391                             | 3,352.40         | 3,022.31         | 3,191.69         | 3,150.07         | 12,716.47         |
| 392                             | 2,883.56         | 2,811.88         | 3,021.15         | 2,893.97         | 11,610.56         |
| 393                             | 2,407.21         | 2,287.54         | 2,218.17         | 2,270.20         | 9,183.12          |
| 394                             | 6,641.21         | 5,952.12         | 6,353.32         | 6,180.47         | 25,127.12         |
| 395                             | 6,064.27         | 5,664.22         | 5,738.22         | 6,001.26         | 23,467.97         |
| 396                             | 1,834.31         | 1,634.29         | 1,671.87         | 1,756.27         | 6,896.73          |
| 397                             | 2,093.88         | 1,663.19         | 1,868.42         | 1,887.50         | 7,512.99          |
| <b>MS - MISSISSIPPI - Total</b> | <b>39,409.66</b> | <b>36,095.99</b> | <b>36,796.64</b> | <b>37,321.56</b> | <b>149,623.84</b> |

**STATE: MT - MONTANA**

| REGISTRANT ZIP CODE 3       | 1ST QUARTER     | 2ND QUARTER     | 3RD QUARTER     | 4TH QUARTER     | TOTAL GRAMS      |
|-----------------------------|-----------------|-----------------|-----------------|-----------------|------------------|
| 590                         | 257.83          | 215.05          | 226.04          | 253.79          | 952.71           |
| 591                         | 1,181.64        | 1,166.03        | 1,166.61        | 1,193.20        | 4,707.47         |
| 592                         | 125.45          | 135.85          | 109.26          | 142.79          | 513.35           |
| 593                         | 230.08          | 234.71          | 215.05          | 237.02          | 916.87           |
| 594                         | 750.95          | 709.91          | 682.74          | 691.99          | 2,835.58         |
| 595                         | 176.90          | 157.82          | 170.54          | 166.49          | 671.75           |
| 596                         | 390.80          | 442.25          | 404.09          | 413.92          | 1,651.05         |
| 597                         | 1,197.82        | 1,045.20        | 1,209.96        | 1,317.49        | 4,770.48         |
| 598                         | 1,359.11        | 1,332.52        | 1,401.31        | 1,476.47        | 5,569.42         |
| 599                         | 486.76          | 513.35          | 510.46          | 539.95          | 2,050.52         |
| <b>MT - MONTANA - Total</b> | <b>6,157.34</b> | <b>5,952.70</b> | <b>6,096.06</b> | <b>6,433.10</b> | <b>24,639.20</b> |

**STATE: NC - NORTH CAROLINA**

| REGISTRANT ZIP CODE 3 | 1ST QUARTER | 2ND QUARTER | 3RD QUARTER | 4TH QUARTER | TOTAL GRAMS |
|-----------------------|-------------|-------------|-------------|-------------|-------------|
| 270                   | 2,358.07    | 2,345.35    | 2,289.28    | 2,580.06    | 9,572.76    |
| 271                   | 3,639.72    | 3,396.34    | 3,334.48    | 3,753.03    | 14,123.56   |

|                                    |                   |                   |                  |                   |                   |
|------------------------------------|-------------------|-------------------|------------------|-------------------|-------------------|
| 272                                | 6,098.96          | 6,088.55          | 6,076.41         | 6,483.97          | 24,747.88         |
| 273                                | 3,659.37          | 3,450.68          | 3,290.55         | 3,791.76          | 14,192.36         |
| 274                                | 3,692.90          | 3,749.56          | 3,596.94         | 3,896.97          | 14,936.37         |
| 275                                | 12,426.84         | 12,229.71         | 11,698.43        | 13,680.74         | 50,035.71         |
| 276                                | 5,837.08          | 5,600.63          | 5,454.37         | 6,110.52          | 23,002.60         |
| 277                                | 2,267.89          | 2,326.85          | 2,134.35         | 2,500.86          | 9,229.94          |
| 278                                | 5,283.83          | 4,946.22          | 4,796.50         | 5,615.09          | 20,641.64         |
| 279                                | 1,224.42          | 1,216.32          | 1,189.73         | 1,388.02          | 5,018.49          |
| 280                                | 10,150.28         | 9,661.79          | 9,357.13         | 10,032.35         | 39,201.54         |
| 281                                | 7,517.03          | 6,974.20          | 6,833.14         | 7,153.99          | 28,478.36         |
| 282                                | 8,150.05          | 8,191.68          | 7,533.80         | 8,461.65          | 32,337.18         |
| 283                                | 8,324.64          | 8,029.23          | 7,228.56         | 8,392.86          | 31,975.29         |
| 284                                | 6,526.75          | 6,421.53          | 5,848.06         | 6,472.41          | 25,268.75         |
| 285                                | 5,800.66          | 5,716.83          | 5,153.76         | 5,483.28          | 22,154.53         |
| 286                                | 8,370.31          | 8,762.84          | 8,240.24         | 8,973.85          | 34,347.23         |
| 287                                | 3,955.36          | 3,813.73          | 3,784.82         | 4,116.65          | 15,670.56         |
| 288                                | 1,682.27          | 1,705.97          | 1,776.50         | 1,856.28          | 7,021.02          |
| 289                                | 274.02            | 291.36            | 265.35           | 293.10            | 1,123.83          |
| <b>NC - NORTH CAROLINA - Total</b> | <b>107,240.44</b> | <b>104,919.37</b> | <b>99,882.38</b> | <b>111,037.40</b> | <b>423,079.59</b> |

**STATE: ND - NORTH DAKOTA**

| REGISTRANT ZIP CODE 3            | 1ST QUARTER     | 2ND QUARTER     | 3RD QUARTER     | 4TH QUARTER     | TOTAL GRAMS      |
|----------------------------------|-----------------|-----------------|-----------------|-----------------|------------------|
| 580                              | 666.55          | 554.40          | 535.90          | 630.13          | 2,386.97         |
| 581                              | 1,731.99        | 1,585.73        | 1,655.68        | 1,716.38        | 6,689.77         |
| 582                              | 1,284.54        | 1,163.14        | 1,193.78        | 1,271.82        | 4,913.27         |
| 583                              | 302.92          | 271.13          | 239.33          | 274.02          | 1,087.41         |
| 584                              | 200.60          | 193.66          | 180.95          | 198.87          | 774.08           |
| 585                              | 545.15          | 548.62          | 541.10          | 659.61          | 2,294.48         |
| 586                              | 142.21          | 138.74          | 167.07          | 144.53          | 592.55           |
| 587                              | 913.98          | 946.35          | 935.94          | 884.49          | 3,680.76         |
| 588                              | 250.90          | 247.43          | 275.75          | 328.94          | 1,103.01         |
| <b>ND - NORTH DAKOTA - Total</b> | <b>6,038.83</b> | <b>5,649.19</b> | <b>5,725.50</b> | <b>6,108.78</b> | <b>23,522.31</b> |

**STATE: NE - NEBRASKA**

| REGISTRANT ZIP CODE 3 | 1ST QUARTER | 2ND QUARTER | 3RD QUARTER | 4TH QUARTER | TOTAL GRAMS |
|-----------------------|-------------|-------------|-------------|-------------|-------------|
| 680                   | 1,644.12    | 1,627.93    | 1,766.67    | 1,763.78    | 6,802.50    |
| 681                   | 6,720.41    | 6,605.95    | 6,513.45    | 7,258.62    | 27,098.44   |
| 683                   | 518.56      | 505.26      | 488.49      | 496.59      | 2,008.90    |
| 684                   | 348.59      | 381.55      | 402.94      | 388.48      | 1,521.56    |
| 685                   | 4,115.93    | 4,035.24    | 4,209.31    | 4,444.26    | 16,804.73   |
| 686                   | 528.96      | 423.17      | 424.90      | 504.10      | 1,881.14    |
| 687                   | 576.37      | 563.07      | 553.82      | 563.65      | 2,256.90    |

|                              |                  |                  |                  |                  |                  |
|------------------------------|------------------|------------------|------------------|------------------|------------------|
| 688                          | 1,307.08         | 1,160.82         | 1,267.20         | 1,359.69         | 5,094.80         |
| 689                          | 472.89           | 420.28           | 417.39           | 441.67           | 1,752.22         |
| 690                          | 162.45           | 157.24           | 169.38           | 158.98           | 648.05           |
| 691                          | 394.26           | 335.88           | 373.45           | 403.51           | 1,507.11         |
| 692                          | 21.39            | 30.06            | 29.48            | 50.29            | 131.23           |
| 693                          | 508.15           | 489.65           | 447.45           | 497.74           | 1,942.99         |
| <b>NE - NEBRASKA - Total</b> | <b>17,319.15</b> | <b>16,736.10</b> | <b>17,063.94</b> | <b>18,331.38</b> | <b>69,450.56</b> |

**STATE: NH - NEW HAMPSHIRE**

| REGISTRANT ZIP CODE 3             | 1ST QUARTER      | 2ND QUARTER      | 3RD QUARTER      | 4TH QUARTER      | TOTAL GRAMS      |
|-----------------------------------|------------------|------------------|------------------|------------------|------------------|
| 030                               | 3,907.38         | 4,081.39         | 3,803.90         | 4,209.15         | 16,001.81        |
| 031                               | 2,147.06         | 2,252.86         | 2,230.89         | 2,414.15         | 9,044.95         |
| 032                               | 1,181.06         | 1,172.96         | 1,104.17         | 1,192.04         | 4,650.24         |
| 033                               | 975.25           | 872.93           | 900.68           | 876.40           | 3,625.27         |
| 034                               | 399.47           | 406.40           | 360.16           | 432.42           | 1,598.45         |
| 035                               | 310.44           | 282.69           | 300.03           | 289.63           | 1,182.79         |
| 036                               | 29.48            | 33.53            | 34.11            | 35.84            | 132.96           |
| 037                               | 823.21           | 897.79           | 800.67           | 838.25           | 3,359.92         |
| 038                               | 4,068.09         | 4,373.90         | 4,224.75         | 4,275.05         | 16,941.80        |
| <b>NH - NEW HAMPSHIRE - Total</b> | <b>13,841.45</b> | <b>14,374.46</b> | <b>13,759.36</b> | <b>14,562.92</b> | <b>56,538.18</b> |

**STATE: NJ - NEW JERSEY**

| REGISTRANT ZIP CODE 3 | 1ST QUARTER | 2ND QUARTER | 3RD QUARTER | 4TH QUARTER | TOTAL GRAMS |
|-----------------------|-------------|-------------|-------------|-------------|-------------|
| 070                   | 8,480.73    | 8,789.43    | 8,243.71    | 8,967.49    | 34,481.35   |
| 071                   | 539.37      | 561.91      | 535.32      | 580.99      | 2,217.59    |
| 072                   | 376.34      | 381.55      | 317.96      | 375.19      | 1,451.03    |
| 073                   | 603.54      | 616.83      | 671.75      | 686.78      | 2,578.90    |
| 074                   | 3,433.91    | 3,429.87    | 3,359.34    | 3,520.05    | 13,743.17   |
| 075                   | 413.34      | 377.50      | 341.08      | 412.76      | 1,544.68    |
| 076                   | 3,193.42    | 3,341.42    | 3,122.90    | 3,491.15    | 13,148.88   |
| 077                   | 3,191.00    | 3,383.07    | 3,269.88    | 3,391.22    | 13,235.17   |
| 078                   | 2,904.37    | 2,983.57    | 2,656.95    | 2,928.08    | 11,472.97   |
| 079                   | 3,139.66    | 3,120.58    | 3,158.74    | 3,352.98    | 12,771.96   |
| 080                   | 8,771.51    | 8,880.77    | 8,299.20    | 8,795.79    | 34,747.28   |
| 081                   | 600.07      | 606.43      | 568.85      | 646.89      | 2,422.24    |
| 082                   | 1,186.84    | 1,207.07    | 1,297.26    | 1,168.92    | 4,860.09    |
| 083                   | 840.56      | 913.40      | 834.78      | 822.06      | 3,410.79    |
| 084                   | 83.25       | 94.81       | 122.56      | 92.50       | 393.11      |
| 085                   | 2,151.69    | 2,211.23    | 2,060.93    | 2,244.76    | 8,668.61    |
| 086                   | 1,463.75    | 1,446.41    | 1,434.84    | 1,450.45    | 5,795.45    |
| 087                   | 2,365.01    | 2,303.73    | 2,257.48    | 2,304.31    | 9,230.52    |
| 088                   | 4,244.41    | 4,252.50    | 3,954.78    | 4,264.64    | 16,716.34   |

|                                |                  |                  |                  |                  |                   |
|--------------------------------|------------------|------------------|------------------|------------------|-------------------|
| 089                            | 497.17           | 435.31           | 453.81           | 500.06           | <b>1,886.34</b>   |
| <b>NJ - NEW JERSEY - Total</b> | <b>48,479.93</b> | <b>49,337.40</b> | <b>46,962.10</b> | <b>49,997.07</b> | <b>194,776.49</b> |

**STATE: NM - NEW MEXICO**

| REGISTRANT ZIP CODE 3          | 1ST QUARTER     | 2ND QUARTER     | 3RD QUARTER     | 4TH QUARTER     | TOTAL GRAMS      |
|--------------------------------|-----------------|-----------------|-----------------|-----------------|------------------|
| 870                            | 233.55          | 232.97          | 209.27          | 244.54          | <b>920.34</b>    |
| 871                            | 1,807.72        | 1,728.52        | 1,630.82        | 1,678.80        | <b>6,845.86</b>  |
| 873                            | 17.34           | 31.22           | 23.12           | 32.37           | <b>104.06</b>    |
| 874                            | 126.60          | 131.81          | 139.90          | 127.18          | <b>525.49</b>    |
| 875                            | 431.26          | 357.27          | 416.81          | 464.79          | <b>1,670.13</b>  |
| 877                            | 80.93           | 64.17           | 72.26           | 60.12           | <b>277.49</b>    |
| 878                            | 43.36           | 44.51           | 49.14           | 47.98           | <b>184.99</b>    |
| 879                            | 16.19           | 11.56           | 27.17           | 14.45           | <b>69.37</b>     |
| 880                            | 377.50          | 360.16          | 398.89          | 399.47          | <b>1,536.01</b>  |
| 881                            | 242.80          | 67.06           | 96.54           | 93.07           | <b>499.48</b>    |
| 882                            | 557.87          | 515.09          | 619.15          | 615.10          | <b>2,307.20</b>  |
| 883                            | 183.84          | 132.38          | 167.07          | 172.27          | <b>655.57</b>    |
| 884                            | 26.59           | 13.87           | 14.45           | 27.75           | <b>82.67</b>     |
| <b>NM - NEW MEXICO - Total</b> | <b>4,145.56</b> | <b>3,690.59</b> | <b>3,864.60</b> | <b>3,977.91</b> | <b>15,678.65</b> |

**STATE: NV - NEVADA**

| REGISTRANT ZIP CODE 3      | 1ST QUARTER     | 2ND QUARTER     | 3RD QUARTER     | 4TH QUARTER     | TOTAL GRAMS      |
|----------------------------|-----------------|-----------------|-----------------|-----------------|------------------|
| 890                        | 1,984.62        | 1,934.32        | 1,809.45        | 1,974.21        | <b>7,702.60</b>  |
| 891                        | 3,949.74        | 3,785.57        | 3,975.65        | 3,803.32        | <b>15,514.28</b> |
| 893                        | 10.41           | 17.92           | 13.87           | 11.56           | <b>53.76</b>     |
| 894                        | 735.34          | 719.16          | 709.91          | 744.59          | <b>2,909.00</b>  |
| 895                        | 1,027.86        | 1,083.36        | 924.96          | 1,044.05        | <b>4,080.23</b>  |
| 897                        | 211.01          | 234.13          | 206.38          | 213.90          | <b>865.42</b>    |
| 898                        | 76.89           | 101.17          | 83.25           | 94.81           | <b>356.11</b>    |
| <b>NV - NEVADA - Total</b> | <b>7,995.86</b> | <b>7,875.63</b> | <b>7,723.47</b> | <b>7,886.44</b> | <b>31,481.41</b> |

**STATE: NY - NEW YORK**

| REGISTRANT ZIP CODE 3 | 1ST QUARTER | 2ND QUARTER | 3RD QUARTER | 4TH QUARTER | TOTAL GRAMS      |
|-----------------------|-------------|-------------|-------------|-------------|------------------|
| 100                   | 16,697.25   | 17,951.48   | 17,225.65   | 18,767.42   | <b>70,641.80</b> |
| 101                   | 952.71      | 967.74      | 903.57      | 993.75      | <b>3,817.77</b>  |
| 102                   | 126.03      | 179.79      | 95.96       | 149.15      | <b>550.93</b>    |
| 103                   | 1,139.44    | 1,020.92    | 966.58      | 1,198.40    | <b>4,325.34</b>  |
| 104                   | 1,135.97    | 1,140.59    | 959.07      | 1,133.08    | <b>4,368.70</b>  |
| 105                   | 5,226.60    | 5,298.86    | 4,997.67    | 5,434.14    | <b>20,957.28</b> |
| 106                   | 513.35      | 596.02      | 471.15      | 601.80      | <b>2,182.33</b>  |
| 107                   | 720.89      | 643.43      | 659.61      | 766.56      | <b>2,790.49</b>  |
| 108                   | 426.64      | 413.92      | 363.62      | 454.96      | <b>1,659.15</b>  |
| 109                   | 2,571.97    | 2,621.68    | 2,429.18    | 2,647.12    | <b>10,269.95</b> |

ARCOS 3 - REPORT 01 by GRAMS  
RETAIL DRUG DISTRIBUTION BY ZIP CODE WITHIN STATE

|     |          |          |          |          |           |
|-----|----------|----------|----------|----------|-----------|
| 110 | 1,282.80 | 1,302.46 | 1,423.86 | 1,590.35 | 5,599.48  |
| 111 | 759.62   | 699.50   | 736.50   | 781.01   | 2,976.64  |
| 112 | 5,812.80 | 6,136.53 | 5,516.23 | 6,002.99 | 23,468.55 |
| 113 | 1,633.13 | 1,751.64 | 1,624.46 | 1,805.98 | 6,815.22  |
| 114 | 513.35   | 504.10   | 464.21   | 564.23   | 2,045.90  |
| 115 | 4,505.71 | 4,346.16 | 4,228.22 | 4,574.51 | 17,654.60 |
| 116 | 359.00   | 330.67   | 328.94   | 322.58   | 1,341.19  |
| 117 | 8,672.66 | 8,964.60 | 8,156.41 | 9,106.23 | 34,899.90 |
| 118 | 586.19   | 500.63   | 544.57   | 534.74   | 2,166.14  |
| 119 | 998.96   | 1,044.05 | 1,130.76 | 1,004.74 | 4,178.51  |
| 120 | 1,925.65 | 1,938.37 | 1,824.48 | 1,882.29 | 7,570.80  |
| 121 | 1,093.77 | 1,075.84 | 1,089.14 | 1,097.81 | 4,356.56  |
| 122 | 693.72   | 666.55   | 675.22   | 755.00   | 2,790.49  |
| 123 | 773.50   | 803.56   | 711.64   | 771.76   | 3,060.46  |
| 124 | 515.09   | 463.06   | 452.07   | 433.58   | 1,863.79  |
| 125 | 2,292.17 | 2,318.18 | 2,211.23 | 2,281.76 | 9,103.34  |
| 126 | 468.26   | 457.86   | 478.67   | 519.13   | 1,923.92  |
| 127 | 430.68   | 442.25   | 440.51   | 422.01   | 1,735.46  |
| 128 | 1,438.27 | 1,472.97 | 1,425.02 | 1,478.78 | 5,815.04  |
| 129 | 448.61   | 406.40   | 425.48   | 419.12   | 1,699.61  |
| 130 | 1,833.73 | 1,756.85 | 1,683.43 | 1,786.33 | 7,060.34  |
| 131 | 726.67   | 779.86   | 668.28   | 787.95   | 2,962.76  |
| 132 | 1,007.63 | 885.65   | 907.62   | 974.10   | 3,774.99  |
| 133 | 520.29   | 480.98   | 452.07   | 500.63   | 1,953.98  |
| 134 | 711.06   | 664.82   | 650.94   | 669.44   | 2,696.26  |
| 135 | 249.16   | 222.57   | 193.66   | 217.37   | 882.76    |
| 136 | 1,219.21 | 1,243.49 | 1,156.78 | 1,272.98 | 4,892.46  |
| 137 | 646.32   | 550.93   | 534.16   | 565.96   | 2,297.37  |
| 138 | 876.40   | 748.64   | 691.99   | 840.56   | 3,157.58  |
| 139 | 607.01   | 537.05   | 600.65   | 520.87   | 2,265.57  |
| 140 | 1,600.18 | 1,623.30 | 1,445.83 | 1,542.37 | 6,211.68  |
| 141 | 593.13   | 605.27   | 560.18   | 650.36   | 2,408.94  |
| 142 | 2,130.30 | 2,214.12 | 2,032.60 | 2,318.76 | 8,695.78  |
| 143 | 171.70   | 171.70   | 189.62   | 158.40   | 691.41    |
| 144 | 2,201.40 | 2,172.50 | 2,093.88 | 2,256.32 | 8,724.11  |
| 145 | 1,810.61 | 1,839.51 | 1,790.95 | 1,897.32 | 7,338.40  |
| 146 | 2,778.12 | 2,764.76 | 2,850.61 | 2,978.37 | 11,371.86 |
| 147 | 677.53   | 663.08   | 652.67   | 601.22   | 2,594.51  |
| 148 | 1,169.50 | 1,190.89 | 1,068.33 | 1,262.57 | 4,691.28  |
| 149 | 284.43   | 318.53   | 316.80   | 319.11   | 1,238.87  |

|                              |                  |                  |                  |                  |                   |
|------------------------------|------------------|------------------|------------------|------------------|-------------------|
| <b>NY - NEW YORK - Total</b> | <b>86,529.15</b> | <b>87,894.32</b> | <b>83,500.76</b> | <b>90,616.00</b> | <b>348,540.24</b> |
|------------------------------|------------------|------------------|------------------|------------------|-------------------|

**STATE: OH - OHIO**

| REGISTRANT ZIP CODE 3    | 1ST QUARTER       | 2ND QUARTER       | 3RD QUARTER      | 4TH QUARTER      | TOTAL GRAMS       |
|--------------------------|-------------------|-------------------|------------------|------------------|-------------------|
| 430                      | 9,402.80          | 9,107.39          | 9,151.90         | 9,679.13         | 37,341.21         |
| 431                      | 3,749.56          | 3,601.56          | 3,614.28         | 3,775.57         | 14,740.97         |
| 432                      | 18,827.56         | 12,695.65         | 6,627.34         | 6,930.26         | 45,080.82         |
| 433                      | 904.73            | 879.29            | 863.10           | 905.88           | 3,553.00          |
| 434                      | 1,127.30          | 944.04            | 976.41           | 1,111.11         | 4,158.85          |
| 435                      | 2,252.86          | 2,163.25          | 2,099.66         | 2,265.57         | 8,781.34          |
| 436                      | 2,981.84          | 2,590.47          | 2,625.15         | 2,707.24         | 10,904.70         |
| 437                      | 933.63            | 971.21            | 926.69           | 1,017.46         | 3,848.99          |
| 438                      | 187.30            | 228.93            | 191.93           | 211.01           | 819.17            |
| 439                      | 1,269.51          | 1,138.28          | 1,066.59         | 1,250.43         | 4,724.81          |
| 440                      | 9,405.69          | 9,133.40          | 9,039.75         | 9,364.06         | 36,942.90         |
| 441                      | 10,527.78         | 10,391.49         | 10,120.22        | 10,597.73        | 41,637.22         |
| 442                      | 4,554.85          | 4,737.53          | 4,569.88         | 4,678.56         | 18,540.82         |
| 443                      | 1,725.63          | 1,748.17          | 1,721.58         | 1,816.39         | 7,011.77          |
| 444                      | 2,317.60          | 2,207.19          | 2,084.05         | 2,151.11         | 8,759.95          |
| 445                      | 1,926.23          | 2,017.57          | 1,933.74         | 2,019.88         | 7,897.42          |
| 446                      | 3,199.21          | 3,165.68          | 2,973.75         | 3,191.11         | 12,529.74         |
| 447                      | 2,687.01          | 2,470.22          | 2,478.89         | 2,692.21         | 10,328.33         |
| 448                      | 1,762.05          | 1,700.77          | 1,699.61         | 1,776.50         | 6,938.93          |
| 449                      | 707.59            | 695.45            | 642.27           | 712.22           | 2,757.54          |
| 450                      | 6,453.59          | 6,307.63          | 6,088.61         | 6,678.85         | 25,528.68         |
| 451                      | 2,336.68          | 2,248.23          | 2,223.95         | 2,428.60         | 9,237.46          |
| 452                      | 7,619.36          | 7,515.30          | 7,255.73         | 7,870.25         | 30,260.64         |
| 453                      | 3,403.85          | 3,257.59          | 3,185.33         | 3,593.47         | 13,440.25         |
| 454                      | 3,781.35          | 3,518.89          | 3,544.33         | 3,620.64         | 14,465.22         |
| 455                      | 805.87            | 721.47            | 726.67           | 716.27           | 2,970.28          |
| 456                      | 1,722.74          | 1,589.78          | 1,567.23         | 1,715.22         | 6,594.96          |
| 457                      | 1,565.49          | 1,493.23          | 1,325.58         | 1,449.87         | 5,834.19          |
| 458                      | 1,134.23          | 1,210.54          | 1,110.53         | 1,184.53         | 4,639.83          |
| <b>OH - OHIO - Total</b> | <b>109,273.88</b> | <b>100,450.21</b> | <b>92,434.78</b> | <b>98,111.14</b> | <b>400,270.01</b> |

**STATE: OK - OKLAHOMA**

| REGISTRANT ZIP CODE 3 | 1ST QUARTER | 2ND QUARTER | 3RD QUARTER | 4TH QUARTER | TOTAL GRAMS |
|-----------------------|-------------|-------------|-------------|-------------|-------------|
| 730                   | 8,822.96    | 8,658.78    | 8,696.36    | 9,050.73    | 35,228.84   |
| 731                   | 7,024.92    | 6,747.71    | 6,663.86    | 6,839.13    | 27,275.63   |
| 734                   | 806.45      | 679.85      | 697.77      | 764.25      | 2,948.31    |
| 735                   | 1,352.18    | 1,335.41    | 1,324.43    | 1,352.75    | 5,364.77    |
| 736                   | 357.84      | 306.39      | 326.63      | 357.27      | 1,348.13    |

|                              |                  |                  |                  |                  |                   |
|------------------------------|------------------|------------------|------------------|------------------|-------------------|
| 737                          | 836.51           | 859.06           | 856.74           | 951.55           | 3,503.86          |
| 738                          | 94.81            | 93.65            | 98.86            | 92.50            | 379.81            |
| 739                          | 70.53            | 54.92            | 60.70            | 64.75            | 250.90            |
| 740                          | 7,241.28         | 6,749.32         | 6,734.87         | 7,244.75         | 27,970.21         |
| 741                          | 4,505.71         | 4,390.67         | 4,123.01         | 4,432.87         | 17,452.26         |
| 743                          | 1,158.51         | 1,155.04         | 1,077.58         | 1,140.59         | 4,531.73          |
| 744                          | 1,816.97         | 1,694.99         | 1,761.47         | 1,887.50         | 7,160.92          |
| 745                          | 649.78           | 676.38           | 672.91           | 620.30           | 2,619.37          |
| 746                          | 461.90           | 371.72           | 357.27           | 389.64           | 1,580.53          |
| 747                          | 658.46           | 574.05           | 589.08           | 648.05           | 2,469.64          |
| 748                          | 1,596.71         | 1,478.20         | 1,540.06         | 1,668.40         | 6,283.37          |
| 749                          | 617.99           | 571.74           | 539.37           | 566.54           | 2,295.64          |
| <b>OK - OKLAHOMA - Total</b> | <b>38,073.52</b> | <b>36,397.88</b> | <b>36,120.95</b> | <b>38,071.56</b> | <b>148,663.91</b> |

**STATE: OR - OREGON**

| REGISTRANT ZIP CODE 3      | 1ST QUARTER      | 2ND QUARTER      | 3RD QUARTER      | 4TH QUARTER      | TOTAL GRAMS      |
|----------------------------|------------------|------------------|------------------|------------------|------------------|
| 970                        | 3,650.70         | 3,727.10         | 3,564.56         | 3,777.88         | 14,720.25        |
| 971                        | 1,116.89         | 1,108.22         | 1,194.93         | 1,128.45         | 4,548.49         |
| 972                        | 4,798.81         | 4,899.98         | 4,564.68         | 4,902.87         | 19,166.33        |
| 973                        | 1,746.44         | 1,685.16         | 1,649.32         | 1,731.99         | 6,812.91         |
| 974                        | 1,779.97         | 1,822.75         | 1,677.07         | 1,832.58         | 7,112.36         |
| 975                        | 622.04           | 667.71           | 705.28           | 639.38           | 2,634.40         |
| 976                        | 93.65            | 110.42           | 89.61            | 100.01           | 393.69           |
| 977                        | 1,186.84         | 1,338.30         | 1,434.84         | 1,269.51         | 5,229.49         |
| 978                        | 407.56           | 394.84           | 417.97           | 461.32           | 1,681.69         |
| 979                        | 106.37           | 115.62           | 115.62           | 101.17           | 438.78           |
| <b>OR - OREGON - Total</b> | <b>15,509.27</b> | <b>15,870.09</b> | <b>15,413.88</b> | <b>15,945.15</b> | <b>62,738.39</b> |

**STATE: PA - PENNSYLVANIA**

| REGISTRANT ZIP CODE 3 | 1ST QUARTER | 2ND QUARTER | 3RD QUARTER | 4TH QUARTER | TOTAL GRAMS |
|-----------------------|-------------|-------------|-------------|-------------|-------------|
| 150                   | 2,622.84    | 2,824.60    | 2,785.29    | 3,033.87    | 11,266.59   |
| 151                   | 2,078.27    | 2,131.45    | 2,032.60    | 2,215.28    | 8,457.60    |
| 152                   | 4,411.48    | 4,355.41    | 4,402.23    | 4,797.07    | 17,966.19   |
| 153                   | 1,012.25    | 998.96      | 1,038.27    | 1,140.01    | 4,189.49    |
| 154                   | 845.76      | 845.76      | 797.78      | 872.93      | 3,362.23    |
| 155                   | 339.34      | 289.05      | 286.74      | 344.55      | 1,259.68    |
| 156                   | 1,938.37    | 1,881.14    | 1,858.01    | 2,102.55    | 7,780.07    |
| 157                   | 1,296.68    | 1,263.15    | 1,155.62    | 1,258.52    | 4,973.97    |
| 158                   | 1,142.90    | 1,114.58    | 1,058.50    | 1,087.98    | 4,403.97    |
| 159                   | 831.89      | 861.37      | 826.10      | 782.75      | 3,302.11    |
| 160                   | 1,473.00    | 1,534.86    | 1,478.78    | 1,533.12    | 6,019.76    |
| 161                   | 1,667.24    | 1,667.82    | 1,660.88    | 1,764.36    | 6,760.30    |



|                                  |                  |                  |                  |                  |                   |
|----------------------------------|------------------|------------------|------------------|------------------|-------------------|
| 162                              | 700.66           | 727.25           | 653.83           | 720.31           | 2,802.05          |
| 163                              | 1,115.73         | 1,049.25         | 1,022.08         | 1,068.33         | 4,255.39          |
| 164                              | 759.05           | 641.11           | 678.69           | 753.26           | 2,832.11          |
| 165                              | 2,960.45         | 2,919.98         | 2,786.44         | 2,977.79         | 11,644.67         |
| 166                              | 1,466.06         | 1,416.35         | 1,349.29         | 1,492.65         | 5,724.35          |
| 167                              | 510.46           | 487.34           | 515.67           | 549.20           | 2,062.66          |
| 168                              | 1,507.11         | 1,293.21         | 1,382.82         | 1,374.14         | 5,557.28          |
| 169                              | 445.72           | 372.87           | 422.59           | 392.53           | 1,633.71          |
| 170                              | 4,606.88         | 4,675.67         | 4,448.48         | 4,634.05         | 18,365.08         |
| 171                              | 1,289.74         | 1,327.90         | 1,200.71         | 1,382.24         | 5,200.59          |
| 172                              | 1,292.05         | 1,291.48         | 1,325.58         | 1,265.46         | 5,174.57          |
| 173                              | 2,126.83         | 2,119.31         | 2,052.83         | 2,114.11         | 8,413.09          |
| 174                              | 1,318.07         | 1,317.49         | 1,175.28         | 1,265.46         | 5,076.30          |
| 175                              | 1,471.84         | 1,524.45         | 1,398.42         | 1,361.43         | 5,756.14          |
| 176                              | 1,592.67         | 1,557.98         | 1,664.93         | 1,551.62         | 6,367.19          |
| 177                              | 788.53           | 712.80           | 725.52           | 769.45           | 2,996.29          |
| 178                              | 751.53           | 740.55           | 769.45           | 802.40           | 3,063.93          |
| 179                              | 315.06           | 290.78           | 302.35           | 273.44           | 1,181.64          |
| 180                              | 2,198.51         | 2,335.52         | 2,224.53         | 2,329.74         | 9,088.31          |
| 181                              | 915.71           | 862.53           | 838.25           | 952.13           | 3,568.61          |
| 182                              | 302.92           | 306.39           | 267.08           | 276.33           | 1,152.73          |
| 183                              | 535.90           | 533.59           | 548.62           | 549.77           | 2,167.88          |
| 184                              | 500.06           | 583.88           | 605.85           | 578.68           | 2,268.46          |
| 185                              | 426.06           | 515.09           | 429.53           | 470.57           | 1,841.25          |
| 186                              | 422.01           | 434.73           | 437.04           | 465.95           | 1,759.74          |
| 187                              | 11,245.20        | 11,182.77        | 10,490.20        | 10,986.79        | 43,904.96         |
| 188                              | 190.19           | 180.37           | 157.82           | 158.40           | 686.78            |
| 189                              | 2,367.32         | 2,279.45         | 2,369.05         | 2,317.60         | 9,333.42          |
| 190                              | 7,967.37         | 8,074.90         | 7,626.87         | 8,289.95         | 31,959.10         |
| 191                              | 6,184.51         | 6,611.73         | 6,091.44         | 7,238.97         | 26,126.65         |
| 193                              | 4,634.05         | 4,616.13         | 4,576.24         | 4,716.72         | 18,543.14         |
| 194                              | 3,714.87         | 3,710.82         | 3,588.84         | 4,074.45         | 15,088.99         |
| 195                              | 935.94           | 915.71           | 849.81           | 897.79           | 3,599.25          |
| 196                              | 1,715.22         | 1,710.02         | 1,665.51         | 1,642.96         | 6,733.71          |
| <b>PA - PENNSYLVANIA - Total</b> | <b>88,934.33</b> | <b>89,087.52</b> | <b>86,022.44</b> | <b>91,627.69</b> | <b>355,671.98</b> |

**STATE: PR - PUERTO RICO**

| REGISTRANT ZIP CODE 3 | 1ST QUARTER | 2ND QUARTER | 3RD QUARTER | 4TH QUARTER | TOTAL GRAMS |
|-----------------------|-------------|-------------|-------------|-------------|-------------|
| 006                   | 368.83      | 350.33      | 301.77      | 374.03      | 1,394.96    |
| 007                   | 283.27      | 256.68      | 247.43      | 315.06      | 1,102.44    |
| 009                   | 1,618.10    | 1,435.42    | 1,443.52    | 1,483.40    | 5,980.44    |

|                                 |                 |                 |                 |                 |                 |
|---------------------------------|-----------------|-----------------|-----------------|-----------------|-----------------|
| <b>PR - PUERTO RICO - Total</b> | <b>2,270.20</b> | <b>2,042.43</b> | <b>1,992.71</b> | <b>2,172.50</b> | <b>8,477.84</b> |
|---------------------------------|-----------------|-----------------|-----------------|-----------------|-----------------|

**STATE: RI - RHODE ISLAND**

| REGISTRANT ZIP CODE 3            | 1ST QUARTER     | 2ND QUARTER     | 3RD QUARTER     | 4TH QUARTER     | TOTAL GRAMS      |
|----------------------------------|-----------------|-----------------|-----------------|-----------------|------------------|
| 028                              | 5,137.57        | 5,022.53        | 4,979.18        | 5,175.15        | 20,314.43        |
| 029                              | 2,257.48        | 2,380.62        | 2,188.11        | 2,317.60        | 9,143.81         |
| <b>RI - RHODE ISLAND - Total</b> | <b>7,395.06</b> | <b>7,403.15</b> | <b>7,167.28</b> | <b>7,492.75</b> | <b>29,458.24</b> |

**STATE: SC - SOUTH CAROLINA**

| REGISTRANT ZIP CODE 3              | 1ST QUARTER      | 2ND QUARTER      | 3RD QUARTER      | 4TH QUARTER      | TOTAL GRAMS       |
|------------------------------------|------------------|------------------|------------------|------------------|-------------------|
| 290                                | 5,366.50         | 5,156.07         | 5,108.09         | 5,472.29         | 21,102.96         |
| 291                                | 3,353.56         | 3,372.06         | 3,111.91         | 3,425.82         | 13,263.35         |
| 292                                | 4,790.71         | 4,461.78         | 4,351.36         | 4,672.20         | 18,276.05         |
| 293                                | 5,028.89         | 4,909.23         | 4,458.89         | 5,178.04         | 19,575.04         |
| 294                                | 13,608.39        | 13,637.84        | 13,218.95        | 13,735.66        | 54,200.83         |
| 295                                | 7,559.81         | 7,452.87         | 7,082.30         | 7,600.86         | 29,695.84         |
| 296                                | 14,793.58        | 14,065.17        | 13,727.56        | 15,141.02        | 57,727.33         |
| 297                                | 3,170.30         | 3,277.25         | 3,072.02         | 3,411.95         | 12,931.52         |
| 298                                | 2,271.93         | 2,240.72         | 2,265.57         | 2,453.46         | 9,231.68          |
| 299                                | 1,890.97         | 1,784.59         | 1,842.40         | 1,769.56         | 7,287.53          |
| <b>SC - SOUTH CAROLINA - Total</b> | <b>61,834.65</b> | <b>60,357.57</b> | <b>58,239.07</b> | <b>62,860.86</b> | <b>243,292.14</b> |

**STATE: SD - SOUTH DAKOTA**

| REGISTRANT ZIP CODE 3            | 1ST QUARTER      | 2ND QUARTER      | 3RD QUARTER     | 4TH QUARTER      | TOTAL GRAMS      |
|----------------------------------|------------------|------------------|-----------------|------------------|------------------|
| 570                              | 1,677.07         | 1,593.24         | 1,663.77        | 1,813.50         | 6,747.58         |
| 571                              | 5,662.49         | 5,482.70         | 5,004.03        | 5,397.72         | 21,546.94        |
| 572                              | 455.54           | 447.45           | 476.35          | 445.14           | 1,824.48         |
| 573                              | 953.87           | 897.21           | 850.96          | 1,000.11         | 3,702.15         |
| 574                              | 528.96           | 459.01           | 522.60          | 520.87           | 2,031.44         |
| 575                              | 312.75           | 302.92           | 250.32          | 293.67           | 1,159.67         |
| 576                              | 19.08            | 23.12            | 24.28           | 21.39            | 87.87            |
| 577                              | 969.47           | 983.93           | 978.15          | 951.55           | 3,883.10         |
| <b>SD - SOUTH DAKOTA - Total</b> | <b>10,579.23</b> | <b>10,189.59</b> | <b>9,770.47</b> | <b>10,443.95</b> | <b>40,983.24</b> |

**STATE: TN - TENNESSEE**

| REGISTRANT ZIP CODE 3 | 1ST QUARTER | 2ND QUARTER | 3RD QUARTER | 4TH QUARTER | TOTAL GRAMS |
|-----------------------|-------------|-------------|-------------|-------------|-------------|
| 370                   | 11,320.35   | 10,645.13   | 10,572.87   | 10,719.71   | 43,258.07   |
| 371                   | 7,338.40    | 7,079.99    | 7,040.68    | 7,139.54    | 28,598.61   |
| 372                   | 7,190.41    | 7,121.61    | 7,147.63    | 7,584.09    | 29,043.74   |
| 373                   | 5,367.08    | 4,957.79    | 5,074.56    | 5,294.24    | 20,693.67   |
| 374                   | 3,176.08    | 3,177.24    | 3,029.24    | 3,155.27    | 12,537.83   |
| 376                   | 2,363.27    | 2,240.14    | 2,238.98    | 2,292.74    | 9,135.14    |
| 377                   | 2,823.44    | 2,786.44    | 2,634.98    | 2,760.43    | 11,005.29   |
| 378                   | 4,250.77    | 4,055.95    | 4,002.19    | 4,220.71    | 16,529.61   |

|                               |                  |                  |                  |                  |                   |
|-------------------------------|------------------|------------------|------------------|------------------|-------------------|
| 379                           | 5,743.42         | 5,805.86         | 5,887.37         | 6,057.91         | 23,494.56         |
| 380                           | 5,338.75         | 5,347.43         | 5,186.71         | 5,400.03         | 21,272.92         |
| 381                           | 7,403.64         | 7,074.47         | 7,003.85         | 7,452.26         | 28,934.22         |
| 382                           | 848.65           | 801.25           | 765.40           | 781.59           | 3,196.89          |
| 383                           | 2,344.20         | 2,059.77         | 2,192.73         | 2,206.61         | 8,803.31          |
| 384                           | 1,770.14         | 1,737.77         | 1,653.94         | 1,778.81         | 6,940.67          |
| 385                           | 1,671.87         | 1,451.03         | 1,493.23         | 1,470.69         | 6,086.81          |
| <b>TN - TENNESSEE - Total</b> | <b>68,950.48</b> | <b>66,341.86</b> | <b>65,924.39</b> | <b>68,314.63</b> | <b>269,531.35</b> |

**STATE: TX - TEXAS**

| REGISTRANT ZIP CODE 3 | 1ST QUARTER | 2ND QUARTER | 3RD QUARTER | 4TH QUARTER | TOTAL GRAMS |
|-----------------------|-------------|-------------|-------------|-------------|-------------|
| 750                   | 31,035.88   | 30,709.25   | 30,827.76   | 31,460.78   | 124,033.67  |
| 751                   | 7,967.95    | 7,535.53    | 7,459.80    | 7,803.77    | 30,767.06   |
| 752                   | 15,394.80   | 14,972.21   | 14,704.55   | 15,743.98   | 60,815.54   |
| 753                   | 22.55       | 54.34       | 36.42       | 42.20       | 155.51      |
| 754                   | 2,641.34    | 2,648.28    | 2,485.83    | 2,724.01    | 10,499.45   |
| 755                   | 917.44      | 868.31      | 870.62      | 902.99      | 3,559.36    |
| 756                   | 3,663.42    | 3,469.76    | 3,207.88    | 3,438.54    | 13,779.59   |
| 757                   | 3,684.81    | 3,722.39    | 3,548.38    | 3,802.16    | 14,757.74   |
| 758                   | 785.06      | 709.91      | 700.66      | 750.37      | 2,946.00    |
| 759                   | 2,284.65    | 2,159.20    | 2,005.43    | 2,206.61    | 8,655.89    |
| 760                   | 13,852.43   | 13,224.62   | 12,997.42   | 13,528.70   | 53,603.17   |
| 761                   | 7,176.53    | 7,221.05    | 6,844.70    | 7,195.03    | 28,437.32   |
| 762                   | 6,156.19    | 5,931.31    | 5,863.67    | 6,386.27    | 24,337.43   |
| 763                   | 1,781.70    | 1,779.39    | 1,675.91    | 1,879.40    | 7,116.41    |
| 764                   | 617.99      | 602.38      | 576.37      | 657.88      | 2,454.61    |
| 765                   | 3,125.21    | 2,603.18    | 2,802.05    | 2,841.94    | 11,372.38   |
| 766                   | 749.22      | 642.27      | 698.92      | 752.69      | 2,843.10    |
| 767                   | 2,938.48    | 2,470.22    | 2,545.95    | 2,815.35    | 10,770.00   |
| 768                   | 361.31      | 358.42      | 342.81      | 401.78      | 1,464.33    |
| 769                   | 1,504.22    | 1,436.58    | 1,364.89    | 1,528.50    | 5,834.19    |
| 770                   | 26,565.70   | 26,562.68   | 25,930.82   | 26,783.72   | 105,842.93  |
| 772                   | 12.72       | 12.14       | 0           | 0           | 24.86       |
| 773                   | 19,784.26   | 19,294.04   | 18,905.81   | 20,236.84   | 78,220.95   |
| 774                   | 16,304.73   | 15,122.52   | 15,384.98   | 16,354.45   | 63,166.67   |
| 775                   | 12,517.60   | 11,836.60   | 11,679.93   | 12,334.92   | 48,369.05   |
| 776                   | 3,285.92    | 3,084.16    | 3,239.09    | 3,507.91    | 13,117.09   |
| 777                   | 1,703.08    | 1,554.51    | 1,581.68    | 1,649.32    | 6,488.59    |
| 778                   | 5,952.70    | 5,669.43    | 5,642.83    | 5,416.22    | 22,681.18   |
| 779                   | 1,956.29    | 1,684.01    | 1,787.49    | 1,774.19    | 7,201.97    |
| 780                   | 5,061.27    | 4,830.03    | 4,770.48    | 5,171.68    | 19,833.45   |

|                           |                   |                   |                   |                   |                     |
|---------------------------|-------------------|-------------------|-------------------|-------------------|---------------------|
| 781                       | 3,866.91          | 3,750.13          | 3,658.79          | 3,938.02          | 15,213.86           |
| 782                       | 16,654.54         | 16,233.89         | 15,806.44         | 16,695.56         | 65,390.42           |
| 783                       | 2,252.86          | 2,000.23          | 1,903.11          | 2,053.41          | 8,209.60            |
| 784                       | 4,025.89          | 3,572.08          | 3,322.92          | 3,683.65          | 14,604.54           |
| 785                       | 7,758.68          | 7,113.52          | 6,892.11          | 7,287.53          | 29,051.84           |
| 786                       | 9,161.73          | 9,043.80          | 8,759.37          | 9,369.84          | 36,334.74           |
| 787                       | 13,976.72         | 13,848.93         | 13,733.86         | 14,812.08         | 56,371.60           |
| 788                       | 759.62            | 627.82            | 699.50            | 680.42            | 2,767.36            |
| 789                       | 375.19            | 400.05            | 382.12            | 384.44            | 1,541.79            |
| 790                       | 591.97            | 574.63            | 520.87            | 567.12            | 2,254.59            |
| 791                       | 1,246.38          | 1,215.17          | 1,204.76          | 1,459.70          | 5,126.01            |
| 792                       | 97.12             | 57.23             | 72.26             | 100.01            | 326.63              |
| 793                       | 348.59            | 336.45            | 350.91            | 337.03            | 1,372.99            |
| 794                       | 3,429.87          | 3,300.95          | 3,139.08          | 3,417.15          | 13,287.05           |
| 795                       | 357.27            | 400.62            | 366.52            | 378.66            | 1,503.06            |
| 796                       | 1,229.62          | 1,311.71          | 1,242.34          | 1,333.68          | 5,117.34            |
| 797                       | 3,072.02          | 2,934.44          | 2,614.17          | 3,100.93          | 11,721.56           |
| 798                       | 98.86             | 85.56             | 71.68             | 91.92             | 348.02              |
| 799                       | 2,901.48          | 2,832.69          | 2,686.43          | 2,835.00          | 11,255.61           |
| <b>TX - TEXAS - Total</b> | <b>272,010.78</b> | <b>262,408.59</b> | <b>257,910.38</b> | <b>272,618.33</b> | <b>1,064,948.09</b> |

**STATE: UT - UTAH**

| REGISTRANT ZIP CODE 3    | 1ST QUARTER      | 2ND QUARTER      | 3RD QUARTER      | 4TH QUARTER      | TOTAL GRAMS      |
|--------------------------|------------------|------------------|------------------|------------------|------------------|
| 840                      | 13,208.14        | 13,080.34        | 13,129.59        | 14,047.38        | 53,465.45        |
| 841                      | 4,164.05         | 4,004.50         | 3,995.25         | 4,373.33         | 16,537.13        |
| 843                      | 847.49           | 818.59           | 759.05           | 874.67           | 3,299.79         |
| 844                      | 1,082.20         | 1,064.28         | 978.15           | 1,130.76         | 4,255.39         |
| 845                      | 123.14           | 128.92           | 116.20           | 147.42           | 515.67           |
| 846                      | 2,244.18         | 2,032.02         | 2,082.32         | 2,191.58         | 8,550.10         |
| 847                      | 909.35           | 960.80           | 838.25           | 945.19           | 3,653.59         |
| <b>UT - UTAH - Total</b> | <b>22,578.56</b> | <b>22,089.45</b> | <b>21,898.79</b> | <b>23,710.32</b> | <b>90,277.12</b> |

**STATE: VA - VIRGINIA**

| REGISTRANT ZIP CODE 3 | 1ST QUARTER | 2ND QUARTER | 3RD QUARTER | 4TH QUARTER | TOTAL GRAMS |
|-----------------------|-------------|-------------|-------------|-------------|-------------|
| 201                   | 7,012.35    | 7,346.49    | 7,233.77    | 7,582.36    | 29,174.97   |
| 220                   | 3,596.36    | 3,559.36    | 3,424.09    | 3,755.92    | 14,335.72   |
| 221                   | 2,829.80    | 2,759.27    | 2,929.23    | 2,748.87    | 11,267.17   |
| 222                   | 1,997.91    | 2,173.08    | 2,093.30    | 2,221.06    | 8,485.35    |
| 223                   | 1,874.20    | 1,881.14    | 1,768.41    | 1,936.64    | 7,460.38    |
| 224                   | 2,195.62    | 2,060.93    | 2,082.89    | 2,311.24    | 8,650.69    |
| 225                   | 1,021.50    | 1,009.94    | 948.08      | 1,038.27    | 4,017.80    |
| 226                   | 1,438.89    | 1,403.05    | 1,477.62    | 1,508.26    | 5,827.83    |

|                              |                  |                  |                  |                  |                   |
|------------------------------|------------------|------------------|------------------|------------------|-------------------|
| 227                          | 480.40           | 507.57           | 527.23           | 520.29           | 2,035.49          |
| 228                          | 1,026.71         | 1,046.94         | 1,005.89         | 1,128.45         | 4,207.99          |
| 229                          | 2,284.07         | 2,315.87         | 2,139.55         | 2,422.24         | 9,161.73          |
| 230                          | 1,617.52         | 1,632.55         | 1,574.74         | 1,718.69         | 6,543.51          |
| 231                          | 4,529.99         | 4,443.28         | 4,311.47         | 4,638.10         | 17,922.83         |
| 232                          | 5,405.81         | 5,263.60         | 4,942.18         | 5,334.13         | 20,945.72         |
| 233                          | 3,200.36         | 2,908.42         | 2,835.58         | 2,983.57         | 11,927.94         |
| 234                          | 6,746.43         | 6,680.52         | 6,567.22         | 6,853.38         | 26,847.54         |
| 235                          | 1,738.92         | 1,566.65         | 1,505.37         | 1,726.78         | 6,537.73          |
| 236                          | 3,210.19         | 3,031.56         | 2,877.78         | 3,203.25         | 12,322.78         |
| 237                          | 1,179.90         | 1,253.90         | 1,289.16         | 1,148.68         | 4,871.65          |
| 238                          | 2,203.62         | 2,130.86         | 1,890.91         | 2,095.87         | 8,321.26          |
| 239                          | 549.77           | 490.23           | 455.54           | 537.05           | 2,032.60          |
| 240                          | 3,081.27         | 3,044.27         | 2,980.68         | 3,225.22         | 12,331.45         |
| 241                          | 1,841.25         | 1,672.44         | 1,747.60         | 1,810.03         | 7,071.32          |
| 242                          | 935.94           | 815.70           | 891.43           | 896.06           | 3,539.13          |
| 243                          | 946.93           | 841.71           | 882.76           | 902.41           | 3,573.81          |
| 244                          | 1,342.35         | 1,382.82         | 1,281.65         | 1,272.98         | 5,279.79          |
| 245                          | 3,019.42         | 2,693.95         | 2,729.79         | 2,934.44         | 11,377.59         |
| 246                          | 552.66           | 526.07           | 480.98           | 611.05           | 2,170.77          |
| <b>VA - VIRGINIA - Total</b> | <b>67,860.17</b> | <b>66,442.17</b> | <b>64,874.90</b> | <b>69,065.29</b> | <b>268,242.53</b> |

**STATE: VI - VIRGIN ISLANDS**

| REGISTRANT ZIP CODE 3              | 1ST QUARTER  | 2ND QUARTER  | 3RD QUARTER  | 4TH QUARTER  | TOTAL GRAMS   |
|------------------------------------|--------------|--------------|--------------|--------------|---------------|
| 008                                | 70.53        | 58.97        | 80.36        | 67.64        | 277.49        |
| <b>VI - VIRGIN ISLANDS - Total</b> | <b>70.53</b> | <b>58.97</b> | <b>80.36</b> | <b>67.64</b> | <b>277.49</b> |

**STATE: VT - VERMONT**

| REGISTRANT ZIP CODE 3       | 1ST QUARTER     | 2ND QUARTER     | 3RD QUARTER     | 4TH QUARTER     | TOTAL GRAMS      |
|-----------------------------|-----------------|-----------------|-----------------|-----------------|------------------|
| 050                         | 300.61          | 302.35          | 319.69          | 302.35          | 1,224.99         |
| 051                         | 275.75          | 256.10          | 259.57          | 261.88          | 1,053.30         |
| 052                         | 653.83          | 631.29          | 630.13          | 642.85          | 2,558.09         |
| 053                         | 695.45          | 697.77          | 657.30          | 715.69          | 2,766.21         |
| 054                         | 2,836.74        | 2,762.16        | 2,733.83        | 2,862.75        | 11,195.48        |
| 056                         | 656.72          | 707.02          | 725.52          | 787.37          | 2,876.63         |
| 057                         | 1,006.47        | 926.12          | 865.99          | 944.62          | 3,743.20         |
| 058                         | 805.87          | 824.37          | 803.56          | 850.96          | 3,284.76         |
| <b>VT - VERMONT - Total</b> | <b>7,231.45</b> | <b>7,107.16</b> | <b>6,995.59</b> | <b>7,368.46</b> | <b>28,702.67</b> |

**STATE: WA - WASHINGTON**

| REGISTRANT ZIP CODE 3 | 1ST QUARTER | 2ND QUARTER | 3RD QUARTER | 4TH QUARTER | TOTAL GRAMS |
|-----------------------|-------------|-------------|-------------|-------------|-------------|
| 980                   | 9,673.17    | 9,803.77    | 9,618.89    | 10,442.86   | 39,538.69   |
| 981                   | 5,830.72    | 5,987.70    | 5,724.35    | 6,185.67    | 23,728.43   |

|                                |                  |                  |                  |                  |                   |
|--------------------------------|------------------|------------------|------------------|------------------|-------------------|
| 982                            | 3,660.53         | 3,769.79         | 3,609.66         | 3,630.47         | 14,670.44         |
| 983                            | 3,515.43         | 3,599.83         | 3,465.71         | 3,625.84         | 14,206.81         |
| 984                            | 2,071.91         | 2,045.90         | 2,007.16         | 2,171.92         | 8,296.89          |
| 985                            | 1,925.65         | 1,951.09         | 1,881.72         | 2,034.91         | 7,793.37          |
| 986                            | 2,391.02         | 2,527.45         | 2,490.45         | 2,676.60         | 10,085.53         |
| 988                            | 289.05           | 345.13           | 330.67           | 381.55           | 1,346.39          |
| 989                            | 594.29           | 642.85           | 590.82           | 739.97           | 2,567.92          |
| 990                            | 460.17           | 444.56           | 460.17           | 445.72           | 1,810.61          |
| 991                            | 360.73           | 298.88           | 343.39           | 408.14           | 1,411.14          |
| 992                            | 2,389.87         | 2,436.11         | 2,264.42         | 2,475.42         | 9,565.82          |
| 993                            | 1,780.55         | 1,792.69         | 1,759.74         | 1,864.95         | 7,197.92          |
| 994                            | 93.65            | 89.03            | 94.23            | 102.32           | 379.23            |
| <b>WA - WASHINGTON - Total</b> | <b>35,036.73</b> | <b>35,734.76</b> | <b>34,641.37</b> | <b>37,186.34</b> | <b>142,599.20</b> |

**STATE: WI - WISCONSIN**

| REGISTRANT ZIP CODE 3         | 1ST QUARTER      | 2ND QUARTER      | 3RD QUARTER      | 4TH QUARTER      | TOTAL GRAMS       |
|-------------------------------|------------------|------------------|------------------|------------------|-------------------|
| 530                           | 7,606.06         | 7,637.28         | 7,669.65         | 8,132.71         | 31,045.70         |
| 531                           | 8,844.93         | 8,843.77         | 8,817.18         | 9,254.22         | 35,760.11         |
| 532                           | 9,519.57         | 9,440.95         | 9,139.76         | 10,400.02        | 38,500.30         |
| 534                           | 2,675.45         | 2,564.45         | 2,711.87         | 2,626.89         | 10,578.65         |
| 535                           | 5,689.66         | 5,562.48         | 5,463.62         | 5,711.63         | 22,427.39         |
| 537                           | 3,174.93         | 3,252.39         | 3,283.03         | 3,560.52         | 13,270.86         |
| 538                           | 892.01           | 798.93           | 726.67           | 896.63           | 3,314.25          |
| 539                           | 2,127.99         | 2,212.39         | 2,165.56         | 2,260.37         | 8,766.31          |
| 540                           | 826.68           | 748.64           | 722.63           | 814.54           | 3,112.49          |
| 541                           | 4,054.22         | 3,980.80         | 3,958.83         | 4,179.66         | 16,173.50         |
| 542                           | 1,704.82         | 1,700.77         | 1,699.04         | 1,705.97         | 6,810.60          |
| 543                           | 5,628.38         | 5,589.07         | 5,472.87         | 5,831.29         | 22,521.62         |
| 544                           | 5,433.56         | 5,381.53         | 5,218.51         | 5,574.04         | 21,607.64         |
| 545                           | 1,200.14         | 1,254.48         | 1,283.38         | 1,263.73         | 5,001.72          |
| 546                           | 2,022.77         | 2,113.53         | 1,894.43         | 2,213.54         | 8,244.28          |
| 547                           | 1,526.76         | 1,574.74         | 1,440.63         | 1,559.14         | 6,101.27          |
| 548                           | 1,518.67         | 1,556.82         | 1,588.04         | 1,748.17         | 6,411.71          |
| 549                           | 7,839.61         | 8,045.42         | 7,890.49         | 8,285.91         | 32,061.43         |
| <b>WI - WISCONSIN - Total</b> | <b>72,286.20</b> | <b>72,258.45</b> | <b>71,146.19</b> | <b>76,018.99</b> | <b>291,709.84</b> |

**STATE: WV - WEST VIRGINIA**

| REGISTRANT ZIP CODE 3 | 1ST QUARTER | 2ND QUARTER | 3RD QUARTER | 4TH QUARTER | TOTAL GRAMS |
|-----------------------|-------------|-------------|-------------|-------------|-------------|
| 247                   | 394.84      | 374.61      | 401.78      | 380.97      | 1,552.20    |
| 248                   | 253.21      | 259.57      | 217.94      | 254.36      | 985.08      |
| 249                   | 336.45      | 358.42      | 382.12      | 368.25      | 1,445.25    |
| 250                   | 711.06      | 702.39      | 672.33      | 724.94      | 2,810.72    |

|                                   |                  |                  |                  |                  |                  |
|-----------------------------------|------------------|------------------|------------------|------------------|------------------|
| 251                               | 563.65           | 494.28           | 520.87           | 605.85           | 2,184.64         |
| 252                               | 353.80           | 385.01           | 374.61           | 322.00           | 1,435.42         |
| 253                               | 1,908.89         | 1,638.34         | 1,591.51         | 1,663.19         | 6,801.92         |
| 254                               | 1,314.60         | 1,314.02         | 1,322.11         | 1,296.10         | 5,246.84         |
| 255                               | 1,600.76         | 1,775.92         | 1,660.30         | 1,740.08         | 6,777.07         |
| 256                               | 213.32           | 206.96           | 223.72           | 236.44           | 880.45           |
| 257                               | 1,479.94         | 1,484.56         | 1,379.92         | 1,682.27         | 6,026.69         |
| 258                               | 1,041.74         | 1,032.49         | 970.05           | 1,079.31         | 4,123.59         |
| 259                               | 301.77           | 306.97           | 280.38           | 302.35           | 1,191.46         |
| 260                               | 1,180.48         | 1,041.16         | 956.18           | 1,006.47         | 4,184.29         |
| 261                               | 1,833.16         | 1,970.16         | 1,737.19         | 1,910.04         | 7,450.55         |
| 262                               | 648.05           | 608.74           | 587.93           | 652.10           | 2,496.81         |
| 263                               | 1,118.05         | 1,195.51         | 1,129.61         | 1,170.65         | 4,613.82         |
| 264                               | 346.28           | 325.47           | 304.66           | 322.58           | 1,298.99         |
| 265                               | 2,098.50         | 2,040.11         | 2,010.05         | 2,164.98         | 8,313.66         |
| 266                               | 243.96           | 228.35           | 213.32           | 253.21           | 938.83           |
| 267                               | 736.50           | 691.41           | 629.55           | 715.11           | 2,772.57         |
| 268                               | 440.51           | 413.92           | 374.03           | 391.95           | 1,620.41         |
| <b>WV - WEST VIRGINIA - Total</b> | <b>19,119.50</b> | <b>18,848.37</b> | <b>17,940.18</b> | <b>19,243.21</b> | <b>75,151.27</b> |

**STATE: WY - WYOMING**

| REGISTRANT ZIP CODE 3       | 1ST QUARTER     | 2ND QUARTER     | 3RD QUARTER     | 4TH QUARTER     | TOTAL GRAMS      |
|-----------------------------|-----------------|-----------------|-----------------|-----------------|------------------|
| 820                         | 599.49          | 628.39          | 560.76          | 598.91          | 2,387.55         |
| 822                         | 87.29           | 78.04           | 63.01           | 84.98           | 313.33           |
| 823                         | 26.01           | 39.89           | 30.64           | 16.19           | 112.73           |
| 824                         | 541.68          | 478.67          | 458.43          | 542.26          | 2,021.04         |
| 825                         | 97.70           | 60.70           | 63.59           | 75.73           | 297.72           |
| 826                         | 313.33          | 319.11          | 325.47          | 302.92          | 1,260.84         |
| 827                         | 303.50          | 318.53          | 290.21          | 325.47          | 1,237.71         |
| 828                         | 185.57          | 182.68          | 172.85          | 153.20          | 694.30           |
| 829                         | 408.72          | 400.62          | 335.88          | 383.28          | 1,528.50         |
| 830                         | 141.63          | 108.10          | 140.48          | 109.84          | 500.06           |
| 831                         | 45.67           | 32.95           | 45.09           | 41.05           | 164.76           |
| <b>WY - WYOMING - Total</b> | <b>2,750.60</b> | <b>2,647.70</b> | <b>2,486.41</b> | <b>2,633.82</b> | <b>10,518.53</b> |

**DRUG: 1724 - METHYLPHENIDATE (DL;D;L;ISOMERS)****STATE: AK - ALASKA**

| REGISTRANT ZIP CODE 3 | 1ST QUARTER | 2ND QUARTER | 3RD QUARTER | 4TH QUARTER | TOTAL GRAMS |
|-----------------------|-------------|-------------|-------------|-------------|-------------|
| 995                   | 4,424.11    | 4,277.25    | 3,882.77    | 4,670.30    | 17,254.44   |
| 996                   | 1,483.63    | 1,452.26    | 1,456.20    | 1,387.64    | 5,779.74    |
| 997                   | 1,310.21    | 1,380.23    | 1,158.14    | 1,337.86    | 5,186.44    |
| 998                   | 535.80      | 517.57      | 490.66      | 499.55      | 2,043.58    |

|                            |                 |                 |                 |                 |                  |
|----------------------------|-----------------|-----------------|-----------------|-----------------|------------------|
| 999                        | 482.94          | 384.28          | 471.71          | 391.02          | 1,729.95         |
| <b>AK - ALASKA - Total</b> | <b>8,236.69</b> | <b>8,011.60</b> | <b>7,459.48</b> | <b>8,286.37</b> | <b>31,994.14</b> |

**STATE: AL - ALABAMA**

| REGISTRANT ZIP CODE 3       | 1ST QUARTER      | 2ND QUARTER      | 3RD QUARTER      | 4TH QUARTER      | TOTAL GRAMS       |
|-----------------------------|------------------|------------------|------------------|------------------|-------------------|
| 350                         | 9,003.53         | 8,116.65         | 8,298.63         | 8,539.77         | 33,958.58         |
| 351                         | 4,854.67         | 4,325.62         | 4,554.67         | 4,621.48         | 18,356.44         |
| 352                         | 8,732.55         | 8,135.19         | 8,059.56         | 8,401.80         | 33,329.10         |
| 354                         | 2,760.49         | 2,448.28         | 2,496.24         | 2,747.43         | 10,452.44         |
| 355                         | 2,111.26         | 1,968.92         | 1,941.37         | 2,171.47         | 8,193.01          |
| 356                         | 4,358.42         | 3,981.39         | 3,841.33         | 4,077.65         | 16,258.79         |
| 357                         | 2,746.65         | 2,484.83         | 2,530.77         | 2,633.23         | 10,395.48         |
| 358                         | 2,918.80         | 2,785.26         | 3,102.03         | 2,970.89         | 11,776.98         |
| 359                         | 3,824.83         | 3,645.33         | 3,561.11         | 3,958.93         | 14,990.19         |
| 360                         | 3,714.41         | 3,339.31         | 3,257.38         | 3,641.68         | 13,952.78         |
| 361                         | 2,937.42         | 2,848.19         | 2,685.61         | 2,886.18         | 11,357.39         |
| 362                         | 1,967.47         | 1,819.17         | 1,893.71         | 2,007.88         | 7,688.22          |
| 363                         | 5,922.96         | 5,258.84         | 5,074.32         | 5,332.90         | 21,589.02         |
| 364                         | 1,444.96         | 1,266.56         | 1,333.22         | 1,504.21         | 5,548.95          |
| 365                         | 6,773.80         | 6,338.17         | 6,430.94         | 6,874.54         | 26,417.44         |
| 366                         | 5,093.74         | 4,711.90         | 4,397.24         | 4,785.44         | 18,988.31         |
| 367                         | 684.98           | 563.59           | 575.08           | 631.44           | 2,455.10          |
| 368                         | 3,919.66         | 3,445.28         | 3,515.39         | 3,872.05         | 14,752.39         |
| 369                         | 183.88           | 147.30           | 169.69           | 143.62           | 644.49            |
| <b>AL - ALABAMA - Total</b> | <b>73,954.47</b> | <b>67,629.75</b> | <b>67,718.28</b> | <b>71,802.60</b> | <b>281,105.10</b> |

**STATE: AR - ARKANSAS**

| REGISTRANT ZIP CODE 3 | 1ST QUARTER | 2ND QUARTER | 3RD QUARTER | 4TH QUARTER | TOTAL GRAMS |
|-----------------------|-------------|-------------|-------------|-------------|-------------|
| 716                   | 1,577.23    | 1,507.40    | 1,442.76    | 1,448.82    | 5,976.21    |
| 717                   | 955.93      | 877.75      | 830.30      | 819.34      | 3,483.31    |
| 718                   | 994.49      | 864.33      | 898.61      | 991.53      | 3,748.97    |
| 719                   | 2,260.76    | 2,092.70    | 2,035.97    | 2,149.56    | 8,538.99    |
| 720                   | 6,195.60    | 6,015.82    | 6,065.10    | 6,218.48    | 24,494.99   |
| 721                   | 4,863.62    | 4,414.89    | 4,192.62    | 4,417.16    | 17,888.30   |
| 722                   | 4,165.42    | 3,831.24    | 3,866.99    | 4,049.14    | 15,912.79   |
| 723                   | 1,460.20    | 1,262.57    | 1,230.71    | 1,356.00    | 5,309.48    |
| 724                   | 3,517.68    | 3,271.23    | 3,265.67    | 3,342.77    | 13,397.35   |
| 725                   | 1,085.21    | 1,072.94    | 1,059.09    | 1,119.21    | 4,336.45    |
| 726                   | 1,433.29    | 1,210.82    | 1,250.05    | 1,137.83    | 5,031.98    |
| 727                   | 6,838.89    | 6,827.22    | 6,725.63    | 6,891.47    | 27,283.20   |
| 728                   | 1,409.22    | 1,321.07    | 1,264.81    | 1,310.26    | 5,305.35    |
| 729                   | 3,027.94    | 2,813.62    | 2,785.70    | 2,886.26    | 11,513.53   |



|                              |                  |                  |                  |                  |                   |
|------------------------------|------------------|------------------|------------------|------------------|-------------------|
| <b>AR - ARKANSAS - Total</b> | <b>39,785.47</b> | <b>37,383.60</b> | <b>36,914.01</b> | <b>38,137.82</b> | <b>152,220.89</b> |
|------------------------------|------------------|------------------|------------------|------------------|-------------------|

**STATE: AS - AMERICAN SAMOA**

| REGISTRANT ZIP CODE 3              | 1ST QUARTER  | 2ND QUARTER | 3RD QUARTER | 4TH QUARTER  | TOTAL GRAMS  |
|------------------------------------|--------------|-------------|-------------|--------------|--------------|
| 967                                | 12.97        | 7.78        | 6.92        | 16.43        | 44.10        |
| <b>AS - AMERICAN SAMOA - Total</b> | <b>12.97</b> | <b>7.78</b> | <b>6.92</b> | <b>16.43</b> | <b>44.10</b> |

**STATE: AZ - ARIZONA**

| REGISTRANT ZIP CODE 3       | 1ST QUARTER      | 2ND QUARTER      | 3RD QUARTER      | 4TH QUARTER      | TOTAL GRAMS       |
|-----------------------------|------------------|------------------|------------------|------------------|-------------------|
| 850                         | 12,169.45        | 11,702.35        | 11,091.04        | 11,997.56        | 46,960.40         |
| 851                         | 4,206.26         | 4,025.42         | 3,976.61         | 4,326.97         | 16,535.27         |
| 852                         | 28,155.24        | 35,160.32        | 48,707.86        | 28,335.20        | 140,358.63        |
| 853                         | 12,027.27        | 11,519.74        | 10,847.38        | 11,918.82        | 46,313.21         |
| 855                         | 811.98           | 718.13           | 694.54           | 760.16           | 2,984.81          |
| 856                         | 2,684.15         | 2,616.19         | 2,698.86         | 2,661.79         | 10,660.99         |
| 857                         | 11,782.54        | 11,187.09        | 11,572.79        | 11,247.47        | 45,789.89         |
| 859                         | 694.38           | 688.03           | 685.56           | 721.89           | 2,789.85          |
| 860                         | 1,359.90         | 1,314.00         | 1,168.27         | 1,359.88         | 5,202.05          |
| 863                         | 1,949.49         | 1,931.17         | 1,901.67         | 2,002.03         | 7,784.36          |
| 864                         | 1,109.88         | 1,030.69         | 987.31           | 1,085.14         | 4,213.01          |
| 865                         | 353.92           | 323.19           | 386.95           | 362.87           | 1,426.94          |
| <b>AZ - ARIZONA - Total</b> | <b>77,304.46</b> | <b>82,216.33</b> | <b>94,718.85</b> | <b>76,779.75</b> | <b>331,019.40</b> |

**STATE: CA - CALIFORNIA**

| REGISTRANT ZIP CODE 3 | 1ST QUARTER | 2ND QUARTER | 3RD QUARTER | 4TH QUARTER | TOTAL GRAMS |
|-----------------------|-------------|-------------|-------------|-------------|-------------|
| 900                   | 9,798.89    | 9,895.45    | 9,038.78    | 9,920.64    | 38,653.75   |
| 902                   | 7,413.27    | 7,472.37    | 6,817.48    | 7,364.62    | 29,067.73   |
| 903                   | 423.98      | 329.50      | 342.33      | 406.94      | 1,502.74    |
| 904                   | 1,208.79    | 1,274.86    | 1,330.70    | 1,429.40    | 5,243.74    |
| 905                   | 1,300.77    | 1,376.40    | 1,127.33    | 1,175.97    | 4,980.46    |
| 906                   | 3,467.10    | 3,508.99    | 3,107.91    | 3,412.90    | 13,496.91   |
| 907                   | 3,443.36    | 3,441.25    | 3,101.43    | 3,310.41    | 13,296.46   |
| 908                   | 2,229.94    | 2,249.25    | 2,053.91    | 2,139.32    | 8,672.42    |
| 910                   | 1,344.41    | 1,411.89    | 1,349.62    | 1,430.26    | 5,536.18    |
| 911                   | 2,226.05    | 2,305.77    | 2,248.29    | 2,255.32    | 9,035.43    |
| 912                   | 980.84      | 1,023.81    | 785.97      | 942.61      | 3,733.24    |
| 913                   | 11,718.30   | 11,638.01   | 10,658.15   | 11,528.28   | 45,542.75   |
| 914                   | 2,795.46    | 2,983.91    | 2,637.97    | 2,934.24    | 11,351.58   |
| 915                   | 797.07      | 824.15      | 716.62      | 757.75      | 3,095.59    |
| 916                   | 787.79      | 807.39      | 781.54      | 826.73      | 3,203.46    |
| 917                   | 8,403.10    | 8,117.39    | 7,741.80    | 8,441.27    | 32,703.56   |
| 918                   | 289.11      | 292.29      | 261.31      | 265.70      | 1,108.41    |
| 919                   | 2,785.53    | 2,767.85    | 2,733.50    | 2,587.00    | 10,873.88   |

|                                |                   |                   |                   |                   |                     |
|--------------------------------|-------------------|-------------------|-------------------|-------------------|---------------------|
| 920                            | 26,986.05         | 26,235.82         | 25,795.93         | 26,722.73         | 105,740.54          |
| 921                            | 11,208.15         | 11,465.05         | 10,722.07         | 10,679.60         | 44,074.87           |
| 922                            | 4,088.36          | 4,156.90          | 3,457.20          | 4,247.46          | 15,949.92           |
| 923                            | 7,487.93          | 7,304.73          | 6,810.03          | 7,271.70          | 28,874.40           |
| 924                            | 848.67            | 855.92            | 682.45            | 798.80            | 3,185.84            |
| 925                            | 9,150.29          | 8,794.71          | 8,189.22          | 8,628.99          | 34,763.21           |
| 926                            | 11,549.78         | 11,906.83         | 11,034.01         | 11,874.04         | 46,364.66           |
| 927                            | 2,859.33          | 2,867.56          | 2,990.10          | 2,852.42          | 11,569.41           |
| 928                            | 7,719.83          | 7,906.00          | 7,058.06          | 8,098.41          | 30,782.31           |
| 930                            | 5,614.18          | 5,670.36          | 4,985.98          | 5,729.46          | 21,999.99           |
| 931                            | 1,605.10          | 1,478.53          | 1,406.47          | 1,628.97          | 6,119.07            |
| 932                            | 3,442.17          | 3,113.30          | 2,902.84          | 3,306.34          | 12,764.64           |
| 933                            | 2,984.37          | 2,939.25          | 2,481.27          | 2,792.81          | 11,197.71           |
| 934                            | 3,197.75          | 3,392.99          | 2,708.59          | 3,211.22          | 12,510.55           |
| 935                            | 3,506.35          | 3,446.82          | 3,206.90          | 3,205.36          | 13,365.43           |
| 936                            | 3,884.99          | 3,622.34          | 3,382.75          | 3,400.06          | 14,290.14           |
| 937                            | 5,224.87          | 4,682.45          | 4,555.74          | 4,934.99          | 19,398.06           |
| 939                            | 2,129.88          | 2,103.18          | 1,930.58          | 2,003.26          | 8,166.89            |
| 940                            | 5,291.64          | 5,499.05          | 5,125.01          | 5,630.36          | 21,546.06           |
| 941                            | 6,285.05          | 6,152.68          | 5,648.76          | 5,962.80          | 24,049.30           |
| 943                            | 1,112.08          | 1,072.85          | 1,044.32          | 1,112.27          | 4,341.52            |
| 944                            | 1,124.54          | 1,104.57          | 1,060.11          | 1,155.42          | 4,444.64            |
| 945                            | 18,487.41         | 16,541.93         | 16,138.82         | 18,147.81         | 69,315.96           |
| 946                            | 3,062.19          | 2,835.25          | 2,778.00          | 2,965.23          | 11,640.67           |
| 947                            | 859.79            | 856.03            | 757.43            | 887.16            | 3,360.42            |
| 948                            | 687.78            | 621.81            | 754.02            | 650.73            | 2,714.34            |
| 949                            | 3,932.62          | 3,694.74          | 3,487.50          | 3,727.51          | 14,842.36           |
| 950                            | 6,609.70          | 6,510.48          | 5,916.09          | 6,565.37          | 25,601.63           |
| 951                            | 3,794.22          | 4,088.69          | 3,587.31          | 4,206.12          | 15,676.35           |
| 952                            | 3,000.71          | 2,869.47          | 2,573.84          | 2,642.88          | 11,086.90           |
| 953                            | 5,687.24          | 5,580.97          | 4,878.42          | 5,496.08          | 21,642.71           |
| 954                            | 3,623.27          | 3,414.42          | 3,251.64          | 3,398.26          | 13,687.59           |
| 955                            | 993.52            | 1,027.33          | 960.22            | 935.07            | 3,916.14            |
| 956                            | 13,353.31         | 12,135.64         | 12,388.29         | 12,886.85         | 50,764.09           |
| 957                            | 3,303.82          | 3,197.15          | 3,085.60          | 3,182.40          | 12,768.96           |
| 958                            | 5,591.46          | 5,262.35          | 4,923.44          | 5,708.35          | 21,485.59           |
| 959                            | 3,932.63          | 3,694.35          | 3,394.08          | 3,464.27          | 14,485.33           |
| 960                            | 2,851.04          | 2,905.32          | 2,669.17          | 2,686.42          | 11,111.95           |
| 961                            | 436.81            | 344.51            | 368.07            | 447.74            | 1,597.12            |
| <b>CA - CALIFORNIA - Total</b> | <b>268,922.66</b> | <b>263,072.88</b> | <b>245,924.94</b> | <b>264,375.09</b> | <b>1,042,295.57</b> |

**STATE: CO - COLORADO**

| REGISTRANT ZIP CODE 3        | 1ST QUARTER      | 2ND QUARTER      | 3RD QUARTER      | 4TH QUARTER      | TOTAL GRAMS       |
|------------------------------|------------------|------------------|------------------|------------------|-------------------|
| 800                          | 10,140.27        | 9,918.43         | 9,901.38         | 10,963.58        | 40,923.67         |
| 801                          | 11,356.90        | 10,734.76        | 10,884.71        | 11,697.74        | 44,674.11         |
| 802                          | 11,253.84        | 10,838.17        | 9,709.11         | 10,635.59        | 42,436.72         |
| 803                          | 1,909.11         | 2,007.26         | 1,999.02         | 2,179.21         | 8,094.60          |
| 804                          | 1,829.76         | 1,708.43         | 1,758.22         | 1,833.99         | 7,130.40          |
| 805                          | 6,719.39         | 6,768.02         | 6,381.02         | 6,885.90         | 26,754.32         |
| 806                          | 2,308.88         | 2,200.94         | 2,167.60         | 2,349.63         | 9,027.05          |
| 807                          | 475.81           | 497.21           | 444.58           | 440.84           | 1,858.43          |
| 808                          | 1,590.03         | 1,425.01         | 1,455.15         | 1,315.59         | 5,785.78          |
| 809                          | 8,099.60         | 7,504.18         | 7,417.80         | 7,337.34         | 30,358.92         |
| 810                          | 1,928.97         | 1,874.12         | 1,692.49         | 1,935.22         | 7,430.80          |
| 811                          | 292.44           | 251.05           | 283.91           | 279.54           | 1,106.95          |
| 812                          | 619.56           | 595.85           | 595.32           | 554.50           | 2,365.24          |
| 813                          | 485.34           | 489.87           | 449.44           | 497.44           | 1,922.10          |
| 814                          | 686.32           | 660.17           | 665.57           | 663.12           | 2,675.18          |
| 815                          | 1,991.48         | 1,957.70         | 1,848.04         | 1,940.55         | 7,737.77          |
| 816                          | 1,239.96         | 1,116.70         | 1,168.85         | 1,217.08         | 4,742.59          |
| <b>CO - COLORADO - Total</b> | <b>62,927.66</b> | <b>60,547.88</b> | <b>58,822.20</b> | <b>62,726.88</b> | <b>245,024.63</b> |

**STATE: CT - CONNECTICUT**

| REGISTRANT ZIP CODE 3           | 1ST QUARTER      | 2ND QUARTER      | 3RD QUARTER      | 4TH QUARTER      | TOTAL GRAMS       |
|---------------------------------|------------------|------------------|------------------|------------------|-------------------|
| 060                             | 12,318.01        | 11,777.04        | 11,009.97        | 11,605.76        | 46,710.78         |
| 061                             | 4,656.02         | 4,178.68         | 3,814.80         | 4,328.98         | 16,978.47         |
| 062                             | 2,736.75         | 2,543.74         | 2,491.32         | 2,552.62         | 10,324.43         |
| 063                             | 5,141.48         | 4,988.39         | 4,384.45         | 4,490.76         | 19,005.07         |
| 064                             | 12,881.05        | 12,125.38        | 10,682.88        | 11,741.08        | 47,430.40         |
| 065                             | 3,839.17         | 3,516.56         | 3,210.98         | 3,630.50         | 14,197.21         |
| 066                             | 1,763.59         | 1,691.31         | 1,328.51         | 1,601.71         | 6,385.12          |
| 067                             | 4,909.54         | 4,452.16         | 4,238.35         | 4,625.39         | 18,225.44         |
| 068                             | 8,799.36         | 8,667.51         | 8,189.15         | 8,772.89         | 34,428.90         |
| 069                             | 1,217.24         | 1,052.71         | 1,029.02         | 1,135.32         | 4,434.29          |
| <b>CT - CONNECTICUT - Total</b> | <b>58,262.20</b> | <b>54,993.48</b> | <b>50,379.41</b> | <b>54,485.01</b> | <b>218,120.11</b> |

**STATE: DC - DISTRICT OF COLUMBIA**

| REGISTRANT ZIP CODE 3              | 1ST QUARTER     | 2ND QUARTER     | 3RD QUARTER     | 4TH QUARTER     | TOTAL GRAMS      |
|------------------------------------|-----------------|-----------------|-----------------|-----------------|------------------|
| 200                                | 7,780.28        | 7,260.17        | 6,675.72        | 7,398.21        | 29,114.38        |
| 203                                | 190.54          | 189.54          | 241.16          | 207.86          | 829.11           |
| 204                                | 520.03          | 312.50          | 417.56          | 436.24          | 1,686.34         |
| 205                                | 0               | 0.86            | 6.23            | 4.41            | 11.50            |
| <b>DC - DISTRICT OF COLUMBIA -</b> | <b>8,490.85</b> | <b>7,763.08</b> | <b>7,340.67</b> | <b>8,046.73</b> | <b>31,641.33</b> |

**STATE: DE - DELAWARE**

| REGISTRANT ZIP CODE 3        | 1ST QUARTER      | 2ND QUARTER      | 3RD QUARTER      | 4TH QUARTER      | TOTAL GRAMS      |
|------------------------------|------------------|------------------|------------------|------------------|------------------|
| 197                          | 7,079.35         | 6,514.14         | 6,210.76         | 6,802.60         | 26,606.85        |
| 198                          | 5,004.31         | 4,867.54         | 4,706.85         | 5,027.30         | 19,606.00        |
| 199                          | 6,469.47         | 6,085.18         | 5,743.98         | 5,986.96         | 24,285.58        |
| <b>DE - DELAWARE - Total</b> | <b>18,553.13</b> | <b>17,466.85</b> | <b>16,661.60</b> | <b>17,816.85</b> | <b>70,498.43</b> |

**STATE: FL - FLORIDA**

| REGISTRANT ZIP CODE 3       | 1ST QUARTER       | 2ND QUARTER       | 3RD QUARTER       | 4TH QUARTER       | TOTAL GRAMS       |
|-----------------------------|-------------------|-------------------|-------------------|-------------------|-------------------|
| 320                         | 8,440.59          | 7,815.58          | 7,282.09          | 7,662.01          | 31,200.28         |
| 321                         | 5,026.28          | 4,795.17          | 4,506.67          | 5,003.67          | 19,331.78         |
| 322                         | 12,939.10         | 12,453.10         | 11,235.99         | 11,834.37         | 48,462.56         |
| 323                         | 5,259.75          | 4,761.25          | 4,447.69          | 4,705.92          | 19,174.60         |
| 324                         | 6,430.67          | 6,219.77          | 5,633.05          | 4,858.29          | 23,141.78         |
| 325                         | 13,347.50         | 12,364.64         | 11,654.31         | 11,706.77         | 49,073.23         |
| 326                         | 5,966.40          | 5,531.42          | 5,255.35          | 5,740.43          | 22,493.60         |
| 327                         | 12,204.23         | 11,529.09         | 11,150.73         | 11,548.26         | 46,432.31         |
| 328                         | 7,942.80          | 7,648.73          | 6,911.97          | 7,680.67          | 30,184.17         |
| 329                         | 9,829.64          | 9,185.13          | 9,063.30          | 9,449.37          | 37,527.43         |
| 330                         | 10,078.83         | 9,447.47          | 8,491.16          | 9,368.13          | 37,385.60         |
| 331                         | 11,460.38         | 10,557.39         | 9,327.90          | 10,173.28         | 41,518.96         |
| 333                         | 4,788.38          | 4,541.07          | 4,260.23          | 4,412.22          | 18,001.90         |
| 334                         | 13,150.10         | 13,009.70         | 11,374.86         | 12,130.79         | 49,665.45         |
| 335                         | 9,892.79          | 9,383.21          | 8,885.00          | 9,650.68          | 37,811.68         |
| 336                         | 9,130.78          | 9,130.38          | 8,593.98          | 8,960.91          | 35,816.04         |
| 337                         | 6,989.96          | 6,961.68          | 6,461.75          | 6,722.67          | 27,136.05         |
| 338                         | 8,758.59          | 7,758.16          | 7,325.34          | 7,613.26          | 31,455.35         |
| 339                         | 8,865.04          | 8,459.55          | 8,035.82          | 8,126.30          | 33,486.72         |
| 341                         | 3,312.06          | 3,067.44          | 2,616.34          | 2,984.83          | 11,980.68         |
| 342                         | 9,980.84          | 8,932.60          | 8,895.16          | 9,133.09          | 36,941.70         |
| 344                         | 5,698.79          | 5,206.78          | 5,253.09          | 4,999.15          | 21,157.81         |
| 346                         | 7,937.64          | 7,689.39          | 7,441.97          | 7,611.69          | 30,680.68         |
| 347                         | 6,998.40          | 6,715.85          | 6,180.83          | 6,555.69          | 26,450.77         |
| 349                         | 4,825.32          | 4,816.19          | 4,341.62          | 4,387.41          | 18,370.54         |
| <b>FL - FLORIDA - Total</b> | <b>209,254.86</b> | <b>197,980.76</b> | <b>184,626.22</b> | <b>193,019.84</b> | <b>784,881.68</b> |

**STATE: GA - GEORGIA**

| REGISTRANT ZIP CODE 3 | 1ST QUARTER | 2ND QUARTER | 3RD QUARTER | 4TH QUARTER | TOTAL GRAMS |
|-----------------------|-------------|-------------|-------------|-------------|-------------|
| 300                   | 31,374.14   | 28,646.34   | 28,355.15   | 30,831.41   | 119,207.03  |
| 301                   | 19,302.34   | 17,787.80   | 17,653.42   | 19,139.11   | 73,882.68   |
| 302                   | 14,720.04   | 12,937.41   | 12,943.28   | 13,568.39   | 54,169.13   |
| 303                   | 12,277.70   | 11,943.84   | 11,620.65   | 12,204.58   | 48,046.77   |

|                             |                   |                   |                   |                   |                   |
|-----------------------------|-------------------|-------------------|-------------------|-------------------|-------------------|
| 304                         | 4,442.11          | 3,582.68          | 3,760.40          | 3,890.72          | 15,675.91         |
| 305                         | 9,714.86          | 9,350.84          | 9,114.12          | 9,732.95          | 37,912.76         |
| 306                         | 6,245.94          | 5,438.36          | 5,579.02          | 6,043.73          | 23,307.04         |
| 307                         | 6,497.07          | 6,115.28          | 6,160.21          | 6,395.52          | 25,168.09         |
| 308                         | 3,338.34          | 3,108.79          | 3,092.78          | 3,242.48          | 12,782.40         |
| 309                         | 4,931.87          | 4,338.74          | 4,555.64          | 4,230.09          | 18,056.34         |
| 310                         | 11,858.18         | 10,444.77         | 11,013.71         | 10,864.97         | 44,181.63         |
| 312                         | 4,008.09          | 3,593.32          | 3,716.24          | 3,705.16          | 15,022.81         |
| 313                         | 5,352.25          | 4,964.88          | 5,233.99          | 4,963.86          | 20,514.97         |
| 314                         | 4,000.22          | 3,533.23          | 3,867.85          | 3,762.41          | 15,163.71         |
| 315                         | 9,080.05          | 7,690.20          | 8,122.27          | 8,209.12          | 33,101.64         |
| 316                         | 4,209.76          | 3,423.61          | 3,733.53          | 3,872.53          | 15,239.43         |
| 317                         | 9,282.18          | 7,386.02          | 7,826.22          | 8,248.95          | 32,743.38         |
| 318                         | 619.21            | 529.68            | 506.36            | 438.66            | 2,093.91          |
| 319                         | 4,992.49          | 4,774.64          | 4,500.44          | 4,709.73          | 18,977.30         |
| 398                         | 1,568.75          | 1,340.91          | 1,382.02          | 1,298.85          | 5,590.53          |
| <b>GA - GEORGIA - Total</b> | <b>167,815.59</b> | <b>150,931.34</b> | <b>152,737.31</b> | <b>159,353.22</b> | <b>630,837.46</b> |

**STATE: GU - GUAM**

| REGISTRANT ZIP CODE 3    | 1ST QUARTER   | 2ND QUARTER   | 3RD QUARTER   | 4TH QUARTER   | TOTAL GRAMS     |
|--------------------------|---------------|---------------|---------------|---------------|-----------------|
| 969                      | 404.01        | 477.07        | 675.57        | 428.08        | 1,984.74        |
| <b>GU - GUAM - Total</b> | <b>404.01</b> | <b>477.07</b> | <b>675.57</b> | <b>428.08</b> | <b>1,984.74</b> |

**STATE: HI - HAWAII**

| REGISTRANT ZIP CODE 3      | 1ST QUARTER      | 2ND QUARTER      | 3RD QUARTER      | 4TH QUARTER      | TOTAL GRAMS      |
|----------------------------|------------------|------------------|------------------|------------------|------------------|
| 967                        | 5,883.53         | 5,420.02         | 5,033.69         | 5,496.97         | 21,834.20        |
| 968                        | 5,343.69         | 5,403.46         | 5,980.58         | 5,186.81         | 21,914.53        |
| <b>HI - HAWAII - Total</b> | <b>11,227.21</b> | <b>10,823.48</b> | <b>11,014.27</b> | <b>10,683.77</b> | <b>43,748.73</b> |

**STATE: IA - IOWA**

| REGISTRANT ZIP CODE 3 | 1ST QUARTER | 2ND QUARTER | 3RD QUARTER | 4TH QUARTER | TOTAL GRAMS |
|-----------------------|-------------|-------------|-------------|-------------|-------------|
| 500                   | 6,656.98    | 6,605.07    | 6,179.51    | 6,723.52    | 26,165.08   |
| 501                   | 4,040.45    | 3,933.10    | 3,660.82    | 3,791.51    | 15,425.88   |
| 502                   | 4,791.16    | 4,667.29    | 4,547.80    | 4,583.68    | 18,589.93   |
| 503                   | 7,794.37    | 7,503.44    | 7,035.32    | 7,743.53    | 30,076.67   |
| 504                   | 2,015.96    | 2,091.44    | 2,082.78    | 2,074.40    | 8,264.58    |
| 505                   | 2,156.98    | 2,237.35    | 1,978.87    | 2,181.66    | 8,554.86    |
| 506                   | 3,256.50    | 3,121.27    | 2,946.19    | 3,315.50    | 12,639.45   |
| 507                   | 1,907.10    | 1,889.33    | 1,618.68    | 1,753.34    | 7,168.46    |
| 508                   | 573.60      | 535.08      | 560.73      | 507.33      | 2,176.74    |
| 510                   | 2,207.58    | 2,161.49    | 2,009.39    | 2,034.74    | 8,413.20    |
| 511                   | 3,879.95    | 3,858.11    | 3,624.31    | 3,966.14    | 15,328.51   |
| 512                   | 1,136.35    | 985.62      | 899.16      | 967.11      | 3,988.25    |

|                          |                  |                  |                  |                  |                   |
|--------------------------|------------------|------------------|------------------|------------------|-------------------|
| 513                      | 1,089.07         | 1,037.24         | 960.80           | 981.87           | 4,068.97          |
| 514                      | 995.09           | 974.64           | 853.80           | 891.97           | 3,715.50          |
| 515                      | 3,375.95         | 3,282.94         | 2,957.73         | 3,139.98         | 12,756.60         |
| 516                      | 515.87           | 543.28           | 436.77           | 428.85           | 1,924.77          |
| 520                      | 3,827.00         | 3,744.47         | 3,485.46         | 3,707.63         | 14,764.56         |
| 521                      | 1,152.15         | 1,196.33         | 1,124.23         | 1,133.73         | 4,606.45          |
| 522                      | 6,900.81         | 6,905.52         | 6,428.56         | 6,814.72         | 27,049.62         |
| 523                      | 3,969.36         | 3,932.83         | 3,731.59         | 3,779.62         | 15,413.40         |
| 524                      | 6,301.96         | 6,109.46         | 5,783.46         | 6,242.34         | 24,437.22         |
| 525                      | 2,244.94         | 2,161.57         | 2,036.38         | 2,347.86         | 8,790.76          |
| 526                      | 2,978.91         | 2,802.71         | 2,828.15         | 3,000.84         | 11,610.60         |
| 527                      | 4,553.70         | 4,406.67         | 4,249.53         | 4,459.26         | 17,669.16         |
| 528                      | 3,402.26         | 3,409.13         | 3,276.78         | 3,286.13         | 13,374.29         |
| <b>IA - IOWA - Total</b> | <b>81,724.04</b> | <b>80,095.38</b> | <b>75,296.80</b> | <b>79,857.27</b> | <b>316,973.49</b> |

**STATE: ID - IDAHO**

| REGISTRANT ZIP CODE 3     | 1ST QUARTER      | 2ND QUARTER      | 3RD QUARTER      | 4TH QUARTER      | TOTAL GRAMS       |
|---------------------------|------------------|------------------|------------------|------------------|-------------------|
| 832                       | 2,741.53         | 2,718.87         | 2,639.18         | 2,703.50         | 10,803.09         |
| 833                       | 2,899.05         | 2,779.11         | 2,431.86         | 2,650.67         | 10,760.69         |
| 834                       | 3,367.18         | 3,357.05         | 3,175.13         | 3,297.19         | 13,196.55         |
| 835                       | 810.21           | 825.42           | 699.21           | 721.49           | 3,056.33          |
| 836                       | 9,113.35         | 8,755.66         | 8,383.12         | 8,533.93         | 34,786.06         |
| 837                       | 7,005.87         | 6,767.37         | 6,332.42         | 6,725.71         | 26,831.36         |
| 838                       | 2,754.10         | 2,783.42         | 2,627.27         | 2,868.94         | 11,033.72         |
| <b>ID - IDAHO - Total</b> | <b>28,691.29</b> | <b>27,986.90</b> | <b>26,288.20</b> | <b>27,501.42</b> | <b>110,467.80</b> |

**STATE: IL - ILLINOIS**

| REGISTRANT ZIP CODE 3 | 1ST QUARTER | 2ND QUARTER | 3RD QUARTER | 4TH QUARTER | TOTAL GRAMS |
|-----------------------|-------------|-------------|-------------|-------------|-------------|
| 600                   | 25,859.15   | 25,283.06   | 24,555.02   | 25,582.53   | 101,279.76  |
| 601                   | 18,601.06   | 17,679.99   | 16,932.88   | 18,318.02   | 71,531.94   |
| 602                   | 1,381.84    | 1,349.34    | 1,156.26    | 1,425.93    | 5,313.37    |
| 603                   | 1,397.63    | 1,251.12    | 1,212.53    | 1,247.49    | 5,108.77    |
| 604                   | 13,262.06   | 12,441.19   | 11,905.92   | 12,935.55   | 50,544.72   |
| 605                   | 15,426.07   | 14,333.47   | 13,837.07   | 15,181.49   | 58,778.10   |
| 606                   | 16,613.62   | 16,594.12   | 14,949.57   | 16,290.08   | 64,447.38   |
| 607                   | 1,149.49    | 1,270.57    | 1,173.31    | 1,213.94    | 4,807.30    |
| 608                   | 639.13      | 579.33      | 581.11      | 596.61      | 2,396.17    |
| 609                   | 2,337.73    | 2,377.88    | 2,083.33    | 2,355.13    | 9,154.08    |
| 610                   | 3,836.34    | 3,545.55    | 3,575.38    | 3,590.37    | 14,547.65   |
| 611                   | 4,010.58    | 3,821.66    | 3,648.62    | 3,816.65    | 15,297.50   |
| 612                   | 3,190.85    | 2,873.57    | 2,765.42    | 2,881.30    | 11,711.14   |
| 613                   | 2,379.90    | 2,217.36    | 1,996.63    | 2,125.80    | 8,719.70    |

|                              |                   |                   |                   |                   |                   |
|------------------------------|-------------------|-------------------|-------------------|-------------------|-------------------|
| 614                          | 2,299.36          | 2,010.82          | 1,903.16          | 2,183.74          | <b>8,397.07</b>   |
| 615                          | 4,138.42          | 3,758.91          | 3,741.82          | 4,114.97          | <b>15,754.13</b>  |
| 616                          | 5,198.56          | 4,796.60          | 4,877.93          | 4,982.59          | <b>19,855.67</b>  |
| 617                          | 6,132.45          | 5,579.74          | 5,611.94          | 5,889.13          | <b>23,213.26</b>  |
| 618                          | 6,271.75          | 5,862.96          | 5,568.76          | 5,936.81          | <b>23,640.28</b>  |
| 619                          | 2,310.66          | 2,083.04          | 1,994.22          | 2,123.58          | <b>8,511.50</b>   |
| 620                          | 5,611.93          | 5,139.79          | 4,834.44          | 5,477.58          | <b>21,063.74</b>  |
| 622                          | 7,474.16          | 7,417.08          | 6,935.41          | 7,492.75          | <b>29,319.40</b>  |
| 623                          | 2,117.23          | 2,133.26          | 1,906.95          | 2,191.88          | <b>8,349.32</b>   |
| 624                          | 2,353.81          | 2,048.46          | 1,970.91          | 2,268.69          | <b>8,641.87</b>   |
| 625                          | 2,701.27          | 2,391.69          | 2,532.04          | 2,549.60          | <b>10,174.60</b>  |
| 626                          | 4,040.80          | 3,751.94          | 3,490.07          | 3,830.83          | <b>15,113.64</b>  |
| 627                          | 4,687.07          | 4,336.16          | 4,271.47          | 4,417.59          | <b>17,712.29</b>  |
| 628                          | 3,591.01          | 3,492.44          | 3,199.62          | 3,404.96          | <b>13,688.04</b>  |
| 629                          | 4,315.10          | 3,895.34          | 3,871.30          | 3,925.73          | <b>16,007.47</b>  |
| <b>IL - ILLINOIS - Total</b> | <b>173,329.01</b> | <b>164,316.41</b> | <b>157,083.11</b> | <b>168,351.34</b> | <b>663,079.86</b> |

**STATE: IN - INDIANA**

| REGISTRANT ZIP CODE 3       | 1ST QUARTER       | 2ND QUARTER       | 3RD QUARTER       | 4TH QUARTER       | TOTAL GRAMS       |
|-----------------------------|-------------------|-------------------|-------------------|-------------------|-------------------|
| 460                         | 13,831.90         | 12,878.41         | 12,721.19         | 13,540.25         | <b>52,971.75</b>  |
| 461                         | 10,709.48         | 10,274.80         | 10,228.64         | 10,613.49         | <b>41,826.41</b>  |
| 462                         | 16,220.97         | 15,397.87         | 14,784.91         | 15,097.43         | <b>61,501.18</b>  |
| 463                         | 9,603.95          | 9,055.77          | 8,476.48          | 9,004.39          | <b>36,140.59</b>  |
| 464                         | 775.13            | 828.68            | 793.76            | 836.99            | <b>3,234.56</b>   |
| 465                         | 8,631.86          | 7,963.55          | 7,429.10          | 8,173.12          | <b>32,197.63</b>  |
| 466                         | 2,669.12          | 2,632.06          | 2,452.65          | 2,505.62          | <b>10,259.45</b>  |
| 467                         | 4,496.38          | 4,442.80          | 4,121.98          | 4,594.21          | <b>17,655.37</b>  |
| 468                         | 6,989.79          | 6,457.41          | 6,121.13          | 6,631.64          | <b>26,199.97</b>  |
| 469                         | 4,921.19          | 4,774.15          | 4,637.08          | 4,871.49          | <b>19,203.91</b>  |
| 470                         | 1,675.41          | 1,485.07          | 1,409.41          | 1,472.48          | <b>6,042.38</b>   |
| 471                         | 6,889.51          | 6,639.78          | 5,666.26          | 5,265.40          | <b>24,460.95</b>  |
| 472                         | 3,804.38          | 3,562.81          | 3,436.61          | 3,701.43          | <b>14,505.24</b>  |
| 473                         | 5,241.52          | 5,031.84          | 4,759.63          | 4,809.47          | <b>19,842.45</b>  |
| 474                         | 3,812.82          | 3,464.31          | 3,396.56          | 3,554.93          | <b>14,228.61</b>  |
| 475                         | 2,862.93          | 2,644.95          | 2,778.76          | 2,672.77          | <b>10,959.41</b>  |
| 476                         | 2,698.15          | 2,580.78          | 2,547.61          | 2,912.00          | <b>10,738.54</b>  |
| 477                         | 5,471.58          | 5,161.44          | 5,024.31          | 5,271.48          | <b>20,928.80</b>  |
| 478                         | 3,353.27          | 3,066.34          | 2,874.42          | 3,035.14          | <b>12,329.17</b>  |
| 479                         | 5,931.12          | 5,478.85          | 5,558.28          | 5,703.12          | <b>22,671.36</b>  |
| <b>IN - INDIANA - Total</b> | <b>120,590.42</b> | <b>113,821.67</b> | <b>109,218.78</b> | <b>114,266.85</b> | <b>457,897.73</b> |

**STATE: KS - KANSAS**

| REGISTRANT ZIP CODE 3      | 1ST QUARTER      | 2ND QUARTER      | 3RD QUARTER      | 4TH QUARTER      | TOTAL GRAMS       |
|----------------------------|------------------|------------------|------------------|------------------|-------------------|
| 660                        | 9,986.56         | 9,563.84         | 9,457.33         | 10,004.57        | 39,012.31         |
| 661                        | 1,228.16         | 1,178.91         | 1,141.83         | 1,239.65         | 4,788.55          |
| 662                        | 8,699.90         | 8,217.78         | 8,012.01         | 8,748.74         | 33,678.43         |
| 664                        | 1,545.81         | 1,758.14         | 1,543.46         | 1,289.47         | 6,136.88          |
| 665                        | 1,763.30         | 1,593.98         | 1,582.74         | 1,804.77         | 6,744.80          |
| 666                        | 5,361.12         | 5,438.81         | 5,144.98         | 5,485.42         | 21,430.34         |
| 667                        | 1,680.89         | 1,688.81         | 1,735.42         | 1,878.62         | 6,983.74          |
| 668                        | 747.87           | 755.52           | 736.73           | 789.37           | 3,029.49          |
| 669                        | 291.30           | 294.65           | 267.25           | 299.70           | 1,152.90          |
| 670                        | 2,659.78         | 2,805.17         | 2,489.32         | 2,786.79         | 10,741.06         |
| 671                        | 1,397.89         | 1,261.25         | 1,210.89         | 1,305.64         | 5,175.67          |
| 672                        | 6,228.89         | 6,201.63         | 5,804.80         | 6,373.28         | 24,608.59         |
| 673                        | 1,491.47         | 1,530.00         | 1,384.52         | 1,480.47         | 5,886.46          |
| 674                        | 1,966.70         | 1,942.37         | 1,809.52         | 1,999.76         | 7,718.34          |
| 675                        | 1,756.75         | 1,739.40         | 1,531.66         | 1,751.44         | 6,779.26          |
| 676                        | 1,035.04         | 992.06           | 956.07           | 1,108.85         | 4,092.02          |
| 677                        | 299.13           | 361.70           | 305.90           | 368.17           | 1,334.90          |
| 678                        | 866.55           | 825.93           | 774.54           | 883.25           | 3,350.28          |
| 679                        | 148.31           | 162.70           | 148.35           | 155.05           | 614.40            |
| <b>KS - KANSAS - Total</b> | <b>49,155.41</b> | <b>48,312.66</b> | <b>46,037.33</b> | <b>49,753.01</b> | <b>193,258.41</b> |

**STATE: KY - KENTUCKY**

| REGISTRANT ZIP CODE 3 | 1ST QUARTER | 2ND QUARTER | 3RD QUARTER | 4TH QUARTER | TOTAL GRAMS |
|-----------------------|-------------|-------------|-------------|-------------|-------------|
| 400                   | 4,177.28    | 3,933.32    | 3,876.27    | 4,034.78    | 16,021.64   |
| 401                   | 2,167.79    | 1,920.96    | 2,389.66    | 1,629.54    | 8,107.94    |
| 402                   | 14,013.49   | 12,793.82   | 12,774.23   | 13,248.94   | 52,830.48   |
| 403                   | 5,937.74    | 5,786.50    | 5,423.22    | 6,062.57    | 23,210.05   |
| 404                   | 2,248.55    | 1,986.29    | 2,009.78    | 2,077.26    | 8,321.86    |
| 405                   | 5,427.68    | 5,044.91    | 4,992.86    | 5,213.97    | 20,679.42   |
| 406                   | 1,028.52    | 1,018.96    | 1,000.24    | 1,009.56    | 4,057.28    |
| 407                   | 1,648.92    | 1,653.14    | 1,607.98    | 1,680.52    | 6,590.56    |
| 408                   | 379.25      | 303.43      | 307.84      | 280.23      | 1,270.75    |
| 409                   | 667.39      | 599.96      | 571.32      | 675.18      | 2,513.85    |
| 410                   | 10,533.40   | 9,687.08    | 9,372.91    | 10,437.80   | 40,031.19   |
| 411                   | 2,202.19    | 2,054.05    | 1,902.22    | 2,013.49    | 8,171.94    |
| 412                   | 742.85      | 616.03      | 685.69      | 659.23      | 2,703.79    |
| 413                   | 363.89      | 453.77      | 375.11      | 429.23      | 1,622.00    |
| 414                   | 304.63      | 269.53      | 234.91      | 244.28      | 1,053.35    |
| 415                   | 1,286.19    | 1,160.33    | 1,110.44    | 1,180.96    | 4,737.92    |
| 416                   | 606.68      | 603.93      | 537.15      | 596.19      | 2,343.95    |



|                              |                  |                  |                  |                  |                   |
|------------------------------|------------------|------------------|------------------|------------------|-------------------|
| 417                          | 944.16           | 940.55           | 831.38           | 955.43           | 3,671.52          |
| 418                          | 340.35           | 343.11           | 362.74           | 356.21           | 1,402.41          |
| 420                          | 4,745.71         | 4,212.88         | 4,310.99         | 4,420.00         | 17,689.58         |
| 421                          | 3,102.65         | 2,835.51         | 3,048.03         | 3,027.05         | 12,013.24         |
| 422                          | 2,806.37         | 2,493.41         | 2,836.41         | 2,416.54         | 10,552.73         |
| 423                          | 2,918.37         | 2,694.81         | 2,639.68         | 2,707.20         | 10,960.06         |
| 424                          | 3,692.81         | 3,035.24         | 3,139.45         | 3,188.04         | 13,055.54         |
| 425                          | 952.08           | 874.31           | 1,009.27         | 1,014.57         | 3,850.23          |
| 426                          | 671.71           | 636.84           | 661.72           | 713.81           | 2,684.09          |
| 427                          | 2,858.75         | 2,709.42         | 2,571.50         | 2,607.29         | 10,746.97         |
| <b>KY - KENTUCKY - Total</b> | <b>76,769.40</b> | <b>70,662.09</b> | <b>70,582.99</b> | <b>72,879.85</b> | <b>290,894.33</b> |

**STATE: LA - LOUISIANA**

| REGISTRANT ZIP CODE 3         | 1ST QUARTER      | 2ND QUARTER      | 3RD QUARTER      | 4TH QUARTER      | TOTAL GRAMS       |
|-------------------------------|------------------|------------------|------------------|------------------|-------------------|
| 700                           | 9,796.91         | 8,821.05         | 8,654.56         | 9,622.56         | 36,895.08         |
| 701                           | 4,660.74         | 4,367.03         | 4,135.14         | 4,583.66         | 17,746.57         |
| 703                           | 4,698.98         | 4,039.45         | 4,023.06         | 4,598.34         | 17,359.83         |
| 704                           | 9,918.88         | 9,103.40         | 8,564.63         | 9,877.34         | 37,464.25         |
| 705                           | 13,142.15        | 11,764.77        | 12,243.91        | 13,575.21        | 50,726.03         |
| 706                           | 8,144.17         | 7,331.81         | 7,273.50         | 7,631.60         | 30,381.07         |
| 707                           | 10,437.53        | 9,499.95         | 9,705.36         | 10,641.30        | 40,284.13         |
| 708                           | 7,271.30         | 6,282.10         | 6,549.70         | 7,042.71         | 27,145.82         |
| 710                           | 1,949.99         | 1,729.86         | 1,520.58         | 1,705.48         | 6,905.90          |
| 711                           | 4,791.99         | 4,504.70         | 4,223.74         | 4,556.28         | 18,076.71         |
| 712                           | 5,004.80         | 4,440.19         | 4,240.41         | 4,810.08         | 18,495.48         |
| 713                           | 3,559.89         | 3,257.18         | 3,445.28         | 3,741.88         | 14,004.23         |
| 714                           | 2,674.96         | 2,509.44         | 2,528.44         | 2,641.14         | 10,353.98         |
| <b>LA - LOUISIANA - Total</b> | <b>86,052.29</b> | <b>77,650.93</b> | <b>77,108.30</b> | <b>85,027.56</b> | <b>325,839.09</b> |

**STATE: MA - MASSACHUSETTS**

| REGISTRANT ZIP CODE 3 | 1ST QUARTER | 2ND QUARTER | 3RD QUARTER | 4TH QUARTER | TOTAL GRAMS |
|-----------------------|-------------|-------------|-------------|-------------|-------------|
| 010                   | 10,532.83   | 10,273.71   | 9,179.11    | 10,092.88   | 40,078.53   |
| 011                   | 4,260.66    | 4,188.13    | 3,440.59    | 3,955.60    | 15,844.99   |
| 012                   | 4,263.71    | 4,336.63    | 3,802.98    | 3,804.67    | 16,207.99   |
| 013                   | 2,094.07    | 1,980.55    | 1,925.67    | 2,111.19    | 8,111.49    |
| 014                   | 5,990.14    | 5,700.67    | 5,200.64    | 5,779.37    | 22,670.82   |
| 015                   | 8,240.36    | 8,049.94    | 7,267.77    | 8,188.98    | 31,747.05   |
| 016                   | 4,078.91    | 3,892.23    | 3,436.23    | 4,036.59    | 15,443.96   |
| 017                   | 11,002.91   | 10,469.21   | 9,771.91    | 10,348.78   | 41,592.82   |
| 018                   | 15,385.08   | 15,275.10   | 13,495.23   | 15,161.09   | 59,316.50   |
| 019                   | 11,204.93   | 11,250.14   | 10,225.79   | 11,102.29   | 43,783.16   |
| 020                   | 10,013.53   | 9,745.75    | 8,888.54    | 9,766.70    | 38,414.52   |

|                                   |                   |                   |                   |                   |                   |
|-----------------------------------|-------------------|-------------------|-------------------|-------------------|-------------------|
| 021                               | 21,398.87         | 20,924.19         | 18,697.45         | 20,766.40         | <b>81,786.90</b>  |
| 022                               | 938.69            | 1,022.92          | 845.93            | 1,203.51          | <b>4,011.05</b>   |
| 023                               | 9,244.47          | 8,900.29          | 8,168.05          | 8,778.88          | <b>35,091.69</b>  |
| 024                               | 11,561.70         | 11,742.58         | 10,396.70         | 11,738.66         | <b>45,439.64</b>  |
| 025                               | 3,028.40          | 2,816.87          | 2,838.25          | 2,775.38          | <b>11,458.91</b>  |
| 026                               | 3,775.45          | 3,717.04          | 3,910.46          | 3,515.23          | <b>14,918.17</b>  |
| 027                               | 9,412.01          | 9,376.85          | 7,933.67          | 8,990.13          | <b>35,712.65</b>  |
| <b>MA - MASSACHUSETTS - Total</b> | <b>146,426.72</b> | <b>143,662.81</b> | <b>129,424.98</b> | <b>142,116.33</b> | <b>561,630.85</b> |

**STATE: MD - MARYLAND**

| REGISTRANT ZIP CODE 3        | 1ST QUARTER       | 2ND QUARTER      | 3RD QUARTER      | 4TH QUARTER      | TOTAL GRAMS       |
|------------------------------|-------------------|------------------|------------------|------------------|-------------------|
| 206                          | 3,938.16          | 3,857.87         | 3,476.87         | 3,784.17         | <b>15,057.08</b>  |
| 207                          | 7,030.97          | 6,677.42         | 6,388.07         | 5,958.58         | <b>26,055.04</b>  |
| 208                          | 15,883.16         | 15,330.56        | 14,344.64        | 14,547.27        | <b>60,105.64</b>  |
| 209                          | 2,852.77          | 2,655.70         | 2,438.91         | 2,690.77         | <b>10,638.15</b>  |
| 210                          | 16,916.96         | 17,307.57        | 15,029.54        | 16,730.37        | <b>65,984.44</b>  |
| 211                          | 8,521.24          | 8,365.81         | 7,313.63         | 8,230.79         | <b>32,431.47</b>  |
| 212                          | 20,238.32         | 20,081.82        | 17,456.02        | 19,917.35        | <b>77,693.51</b>  |
| 214                          | 2,021.64          | 1,840.75         | 1,844.69         | 1,917.73         | <b>7,624.81</b>   |
| 215                          | 3,430.44          | 3,395.52         | 3,095.41         | 3,368.15         | <b>13,289.52</b>  |
| 216                          | 3,895.28          | 3,800.21         | 3,439.95         | 3,652.80         | <b>14,788.25</b>  |
| 217                          | 11,796.42         | 11,663.17        | 10,377.56        | 11,579.48        | <b>45,416.63</b>  |
| 218                          | 3,215.68          | 3,156.69         | 2,802.19         | 3,175.78         | <b>12,350.33</b>  |
| 219                          | 1,835.97          | 1,798.88         | 1,711.14         | 1,803.42         | <b>7,149.41</b>   |
| <b>MD - MARYLAND - Total</b> | <b>101,577.01</b> | <b>99,931.99</b> | <b>89,718.61</b> | <b>97,356.66</b> | <b>388,584.27</b> |

**STATE: ME - MAINE**

| REGISTRANT ZIP CODE 3     | 1ST QUARTER      | 2ND QUARTER      | 3RD QUARTER      | 4TH QUARTER      | TOTAL GRAMS       |
|---------------------------|------------------|------------------|------------------|------------------|-------------------|
| 039                       | 802.97           | 773.87           | 729.33           | 651.96           | <b>2,958.12</b>   |
| 040                       | 7,915.67         | 8,012.40         | 7,194.39         | 7,359.53         | <b>30,481.99</b>  |
| 041                       | 2,801.04         | 2,850.94         | 2,799.73         | 2,817.28         | <b>11,268.99</b>  |
| 042                       | 3,318.29         | 3,078.85         | 2,964.42         | 2,981.28         | <b>12,342.85</b>  |
| 043                       | 2,721.29         | 2,815.75         | 2,740.52         | 2,789.92         | <b>11,067.48</b>  |
| 044                       | 6,494.19         | 6,109.39         | 5,896.15         | 6,110.54         | <b>24,610.28</b>  |
| 045                       | 1,374.44         | 1,389.86         | 1,251.52         | 1,319.76         | <b>5,335.58</b>   |
| 046                       | 2,085.96         | 1,999.11         | 1,933.12         | 1,831.19         | <b>7,849.37</b>   |
| 047                       | 2,130.75         | 2,074.43         | 1,800.27         | 1,726.36         | <b>7,731.82</b>   |
| 048                       | 1,190.46         | 1,311.19         | 1,344.90         | 1,294.57         | <b>5,141.11</b>   |
| 049                       | 5,183.57         | 5,133.34         | 4,856.78         | 4,544.44         | <b>19,718.13</b>  |
| <b>ME - MAINE - Total</b> | <b>36,018.64</b> | <b>35,549.13</b> | <b>33,511.13</b> | <b>33,426.83</b> | <b>138,505.73</b> |

**STATE: MI - MICHIGAN**

| REGISTRANT ZIP CODE 3 | 1ST QUARTER | 2ND QUARTER | 3RD QUARTER | 4TH QUARTER | TOTAL GRAMS |
|-----------------------|-------------|-------------|-------------|-------------|-------------|
|-----------------------|-------------|-------------|-------------|-------------|-------------|

|                              |                   |                   |                   |                   |                   |
|------------------------------|-------------------|-------------------|-------------------|-------------------|-------------------|
| 480                          | 23,856.10         | 22,504.76         | 20,175.61         | 22,590.69         | 89,127.16         |
| 481                          | 27,205.43         | 26,132.02         | 23,547.15         | 26,160.40         | 103,045.01        |
| 482                          | 4,851.83          | 4,484.19          | 4,162.71          | 4,294.79          | 17,793.53         |
| 483                          | 19,464.39         | 18,969.19         | 17,361.04         | 18,731.93         | 74,526.55         |
| 484                          | 6,370.54          | 6,235.89          | 5,534.22          | 6,259.73          | 24,400.38         |
| 485                          | 2,385.50          | 2,243.85          | 1,955.77          | 2,087.72          | 8,672.84          |
| 486                          | 7,190.72          | 6,845.46          | 6,456.85          | 6,646.93          | 27,139.95         |
| 487                          | 4,321.41          | 4,021.76          | 3,472.29          | 3,852.08          | 15,667.54         |
| 488                          | 12,879.43         | 12,229.71         | 11,522.28         | 12,606.71         | 49,238.13         |
| 489                          | 3,047.25          | 3,031.34          | 2,758.89          | 2,783.33          | 11,620.81         |
| 490                          | 13,449.78         | 13,324.93         | 12,359.83         | 13,205.29         | 52,339.84         |
| 491                          | 1,085.63          | 1,007.81          | 943.67            | 999.17            | 4,036.28          |
| 492                          | 5,809.56          | 5,321.04          | 4,873.02          | 5,403.82          | 21,407.44         |
| 493                          | 6,030.50          | 5,534.76          | 5,184.55          | 5,431.31          | 22,181.12         |
| 494                          | 16,666.97         | 16,076.55         | 15,489.71         | 16,159.46         | 64,392.69         |
| 495                          | 12,828.16         | 12,204.11         | 11,834.35         | 12,233.97         | 49,100.59         |
| 496                          | 7,101.72          | 6,608.77          | 6,262.72          | 6,248.84          | 26,222.05         |
| 497                          | 5,289.61          | 5,065.79          | 4,677.90          | 4,922.79          | 19,956.10         |
| 498                          | 7,161.21          | 6,131.11          | 6,326.68          | 6,202.49          | 25,821.49         |
| 499                          | 1,470.34          | 1,238.25          | 1,323.97          | 1,328.03          | 5,360.59          |
| <b>MI - MICHIGAN - Total</b> | <b>188,466.09</b> | <b>179,211.28</b> | <b>166,223.22</b> | <b>178,149.49</b> | <b>712,050.08</b> |

**STATE: MN - MINNESOTA**

| REGISTRANT ZIP CODE 3         | 1ST QUARTER       | 2ND QUARTER      | 3RD QUARTER      | 4TH QUARTER       | TOTAL GRAMS       |
|-------------------------------|-------------------|------------------|------------------|-------------------|-------------------|
| 550                           | 11,512.22         | 11,047.58        | 10,357.00        | 11,666.77         | 44,583.57         |
| 551                           | 14,836.77         | 14,578.52        | 13,620.94        | 14,526.79         | 57,563.02         |
| 553                           | 21,104.10         | 19,649.41        | 18,639.68        | 20,953.18         | 80,346.37         |
| 554                           | 19,593.32         | 19,162.43        | 18,132.48        | 19,734.48         | 76,622.71         |
| 556                           | 192.85            | 196.39           | 207.20           | 157.35            | 753.79            |
| 557                           | 2,293.44          | 2,173.90         | 2,155.88         | 2,171.13          | 8,794.36          |
| 558                           | 2,741.74          | 2,609.56         | 2,503.29         | 2,607.54          | 10,462.13         |
| 559                           | 8,521.72          | 8,001.76         | 7,686.81         | 8,358.28          | 32,568.57         |
| 560                           | 4,819.53          | 4,524.98         | 4,147.68         | 4,466.26          | 17,958.45         |
| 561                           | 1,430.18          | 1,397.19         | 1,336.81         | 1,405.46          | 5,569.64          |
| 562                           | 2,400.45          | 2,300.24         | 2,213.75         | 2,340.24          | 9,254.69          |
| 563                           | 6,186.71          | 5,765.64         | 5,540.60         | 5,953.00          | 23,445.95         |
| 564                           | 2,212.24          | 2,080.79         | 2,062.04         | 2,146.21          | 8,501.28          |
| 565                           | 3,749.57          | 3,483.17         | 3,608.49         | 3,613.43          | 14,454.66         |
| 566                           | 1,050.90          | 981.88           | 867.42           | 990.39            | 3,890.59          |
| 567                           | 1,014.28          | 930.32           | 992.99           | 996.26            | 3,933.85          |
| <b>MN - MINNESOTA - Total</b> | <b>103,660.03</b> | <b>98,883.75</b> | <b>94,073.07</b> | <b>102,086.78</b> | <b>398,703.63</b> |

**STATE: MO - MISSOURI**

| REGISTRANT ZIP CODE 3        | 1ST QUARTER       | 2ND QUARTER       | 3RD QUARTER       | 4TH QUARTER       | TOTAL GRAMS       |
|------------------------------|-------------------|-------------------|-------------------|-------------------|-------------------|
| 630                          | 17,096.97         | 15,563.06         | 15,255.65         | 16,548.06         | 64,463.74         |
| 631                          | 36,161.98         | 38,932.22         | 40,946.45         | 62,248.91         | 178,289.56        |
| 633                          | 11,543.44         | 10,895.95         | 10,940.55         | 11,641.79         | 45,021.73         |
| 634                          | 1,366.10          | 1,228.92          | 1,336.99          | 1,439.83          | 5,371.84          |
| 635                          | 779.29            | 717.20            | 731.85            | 831.87            | 3,060.21          |
| 636                          | 2,212.62          | 2,121.73          | 2,062.88          | 2,141.07          | 8,538.29          |
| 637                          | 2,073.49          | 1,815.20          | 1,894.50          | 2,043.08          | 7,826.27          |
| 638                          | 2,235.80          | 2,124.16          | 2,038.85          | 2,233.89          | 8,632.70          |
| 639                          | 835.48            | 773.69            | 685.93            | 769.17            | 3,064.28          |
| 640                          | 10,044.10         | 9,468.36          | 9,282.39          | 10,074.30         | 38,869.15         |
| 641                          | 11,107.40         | 11,100.05         | 10,863.16         | 11,228.48         | 44,299.10         |
| 644                          | 962.89            | 931.58            | 904.81            | 956.73            | 3,756.01          |
| 645                          | 2,046.36          | 2,084.15          | 1,828.65          | 2,114.02          | 8,073.18          |
| 646                          | 637.07            | 507.93            | 569.47            | 537.50            | 2,251.97          |
| 647                          | 999.70            | 911.25            | 948.64            | 1,010.91          | 3,870.50          |
| 648                          | 3,133.32          | 2,978.87          | 2,865.95          | 3,044.48          | 12,022.62         |
| 650                          | 1,383.36          | 1,280.14          | 1,159.38          | 1,291.97          | 5,114.84          |
| 651                          | 1,655.17          | 1,402.09          | 1,496.66          | 1,717.58          | 6,271.51          |
| 652                          | 3,885.09          | 3,526.20          | 3,636.63          | 4,066.44          | 15,114.35         |
| 653                          | 1,139.75          | 1,213.93          | 1,162.38          | 1,120.29          | 4,636.35          |
| 654                          | 1,458.63          | 1,358.32          | 1,311.83          | 1,316.70          | 5,445.49          |
| 655                          | 1,445.48          | 1,330.88          | 1,288.81          | 1,337.24          | 5,402.42          |
| 656                          | 1,652.32          | 1,612.61          | 1,528.46          | 1,698.25          | 6,491.64          |
| 657                          | 3,497.32          | 3,383.32          | 3,109.46          | 3,339.88          | 13,329.98         |
| 658                          | 4,186.62          | 3,941.26          | 3,809.48          | 4,190.19          | 16,127.55         |
| <b>MO - MISSOURI - Total</b> | <b>123,539.76</b> | <b>121,203.09</b> | <b>121,659.82</b> | <b>148,942.62</b> | <b>515,345.28</b> |

**STATE: MS - MISSISSIPPI**

| REGISTRANT ZIP CODE 3 | 1ST QUARTER | 2ND QUARTER | 3RD QUARTER | 4TH QUARTER | TOTAL GRAMS |
|-----------------------|-------------|-------------|-------------|-------------|-------------|
| 386                   | 5,939.19    | 5,706.33    | 5,670.34    | 6,092.50    | 23,408.36   |
| 387                   | 662.29      | 609.31      | 619.09      | 601.14      | 2,491.83    |
| 388                   | 3,195.51    | 3,070.89    | 3,020.85    | 3,316.85    | 12,604.09   |
| 389                   | 1,052.44    | 1,065.77    | 1,022.31    | 1,063.05    | 4,203.57    |
| 390                   | 3,568.87    | 3,311.87    | 3,264.15    | 3,572.57    | 13,717.45   |
| 391                   | 3,420.01    | 3,100.36    | 3,138.82    | 3,510.64    | 13,169.83   |
| 392                   | 3,043.10    | 3,121.57    | 3,183.02    | 3,214.39    | 12,562.08   |
| 393                   | 2,619.63    | 2,462.20    | 2,412.55    | 2,362.33    | 9,856.71    |
| 394                   | 6,418.89    | 6,109.85    | 6,188.71    | 6,648.76    | 25,366.21   |
| 395                   | 9,209.73    | 8,031.02    | 8,396.71    | 8,942.33    | 34,579.79   |

|                                 |                  |                  |                  |                  |                   |
|---------------------------------|------------------|------------------|------------------|------------------|-------------------|
| 396                             | 1,871.64         | 1,784.99         | 1,750.39         | 1,733.07         | <b>7,140.08</b>   |
| 397                             | 1,503.87         | 1,309.76         | 1,424.28         | 1,585.22         | <b>5,823.13</b>   |
| <b>MS - MISSISSIPPI - Total</b> | <b>42,505.17</b> | <b>39,683.90</b> | <b>40,091.23</b> | <b>42,642.84</b> | <b>164,923.13</b> |

**STATE: MT - MONTANA**

| REGISTRANT ZIP CODE 3       | 1ST QUARTER      | 2ND QUARTER      | 3RD QUARTER      | 4TH QUARTER      | TOTAL GRAMS      |
|-----------------------------|------------------|------------------|------------------|------------------|------------------|
| 590                         | 988.44           | 874.99           | 843.18           | 845.81           | <b>3,552.42</b>  |
| 591                         | 4,065.34         | 4,010.45         | 3,716.63         | 4,186.54         | <b>15,978.95</b> |
| 592                         | 689.08           | 583.03           | 464.40           | 588.06           | <b>2,324.57</b>  |
| 593                         | 779.59           | 719.02           | 636.98           | 706.71           | <b>2,842.30</b>  |
| 594                         | 2,423.23         | 2,294.39         | 2,085.67         | 2,301.13         | <b>9,104.43</b>  |
| 595                         | 395.26           | 351.20           | 322.72           | 274.28           | <b>1,343.46</b>  |
| 596                         | 1,289.26         | 1,337.53         | 1,266.19         | 1,304.28         | <b>5,197.27</b>  |
| 597                         | 2,784.35         | 2,608.10         | 2,532.73         | 2,568.06         | <b>10,493.24</b> |
| 598                         | 3,058.02         | 2,802.31         | 2,734.28         | 2,822.71         | <b>11,417.32</b> |
| 599                         | 1,440.35         | 1,364.29         | 1,250.11         | 1,375.19         | <b>5,429.94</b>  |
| <b>MT - MONTANA - Total</b> | <b>17,912.93</b> | <b>16,945.32</b> | <b>15,852.89</b> | <b>16,972.77</b> | <b>67,683.91</b> |

**STATE: NC - NORTH CAROLINA**

| REGISTRANT ZIP CODE 3              | 1ST QUARTER       | 2ND QUARTER       | 3RD QUARTER       | 4TH QUARTER       | TOTAL GRAMS       |
|------------------------------------|-------------------|-------------------|-------------------|-------------------|-------------------|
| 270                                | 5,068.71          | 4,319.62          | 4,084.80          | 4,724.99          | <b>18,198.12</b>  |
| 271                                | 5,963.77          | 5,130.60          | 4,653.35          | 5,375.08          | <b>21,122.80</b>  |
| 272                                | 11,213.31         | 10,939.07         | 9,675.20          | 11,081.65         | <b>42,909.23</b>  |
| 273                                | 6,736.85          | 6,741.00          | 5,809.40          | 6,898.82          | <b>26,186.07</b>  |
| 274                                | 5,859.59          | 5,418.23          | 4,795.88          | 5,278.24          | <b>21,351.94</b>  |
| 275                                | 24,835.34         | 23,777.14         | 21,489.87         | 24,728.03         | <b>94,830.37</b>  |
| 276                                | 9,233.29          | 9,042.06          | 8,395.14          | 9,286.46          | <b>35,956.95</b>  |
| 277                                | 5,990.51          | 5,577.99          | 5,095.59          | 5,438.28          | <b>22,102.37</b>  |
| 278                                | 9,148.22          | 8,081.15          | 7,608.55          | 9,052.32          | <b>33,890.25</b>  |
| 279                                | 2,539.47          | 2,327.54          | 2,267.37          | 2,565.10          | <b>9,699.48</b>   |
| 280                                | 18,237.75         | 16,438.16         | 15,099.13         | 16,657.35         | <b>66,432.39</b>  |
| 281                                | 13,341.60         | 12,748.06         | 11,423.43         | 12,764.70         | <b>50,277.79</b>  |
| 282                                | 13,706.56         | 12,825.36         | 11,489.28         | 12,700.04         | <b>50,721.23</b>  |
| 283                                | 16,205.55         | 15,662.88         | 13,460.52         | 14,520.77         | <b>59,849.72</b>  |
| 284                                | 8,608.91          | 7,854.87          | 7,079.33          | 8,035.22          | <b>31,578.32</b>  |
| 285                                | 11,842.15         | 11,234.07         | 10,207.33         | 9,890.58          | <b>43,174.12</b>  |
| 286                                | 11,232.73         | 10,203.89         | 9,108.91          | 10,241.33         | <b>40,786.86</b>  |
| 287                                | 8,942.59          | 8,624.68          | 7,889.27          | 8,680.62          | <b>34,137.17</b>  |
| 288                                | 4,071.83          | 4,008.35          | 3,662.05          | 3,853.28          | <b>15,595.51</b>  |
| 289                                | 550.28            | 667.46            | 541.60            | 458.51            | <b>2,217.85</b>   |
| <b>NC - NORTH CAROLINA - Total</b> | <b>193,329.00</b> | <b>181,622.18</b> | <b>163,836.01</b> | <b>182,231.37</b> | <b>721,018.56</b> |

**STATE: ND - NORTH DAKOTA**

| REGISTRANT ZIP CODE 3            | 1ST QUARTER      | 2ND QUARTER      | 3RD QUARTER      | 4TH QUARTER      | TOTAL GRAMS      |
|----------------------------------|------------------|------------------|------------------|------------------|------------------|
| 580                              | 1,625.60         | 1,638.62         | 1,410.20         | 1,710.29         | 6,384.72         |
| 581                              | 3,776.19         | 3,364.65         | 3,487.31         | 3,604.02         | 14,232.17        |
| 582                              | 2,286.89         | 2,289.84         | 2,116.48         | 2,243.87         | 8,937.09         |
| 583                              | 1,067.60         | 916.90           | 964.49           | 1,030.80         | 3,979.79         |
| 584                              | 708.94           | 642.68           | 571.17           | 634.55           | 2,557.33         |
| 585                              | 2,940.67         | 2,963.84         | 2,731.82         | 2,956.49         | 11,592.82        |
| 586                              | 854.42           | 670.87           | 685.19           | 809.42           | 3,019.91         |
| 587                              | 1,693.22         | 1,708.55         | 1,718.71         | 1,802.94         | 6,923.42         |
| 588                              | 708.31           | 621.02           | 612.32           | 690.70           | 2,632.35         |
| <b>ND - NORTH DAKOTA - Total</b> | <b>15,661.85</b> | <b>14,816.96</b> | <b>14,297.70</b> | <b>15,483.09</b> | <b>60,259.60</b> |

**STATE: NE - NEBRASKA**

| REGISTRANT ZIP CODE 3        | 1ST QUARTER      | 2ND QUARTER      | 3RD QUARTER      | 4TH QUARTER      | TOTAL GRAMS       |
|------------------------------|------------------|------------------|------------------|------------------|-------------------|
| 680                          | 3,255.86         | 3,180.47         | 3,206.97         | 3,352.74         | 12,996.03         |
| 681                          | 12,477.77        | 12,040.29        | 11,866.83        | 12,468.16        | 48,853.06         |
| 683                          | 887.70           | 824.62           | 781.22           | 856.19           | 3,349.73          |
| 684                          | 801.22           | 696.62           | 685.33           | 731.01           | 2,914.18          |
| 685                          | 5,581.36         | 5,552.03         | 5,538.71         | 5,934.19         | 22,606.29         |
| 686                          | 822.48           | 694.09           | 669.34           | 742.79           | 2,928.69          |
| 687                          | 1,541.99         | 1,432.78         | 1,445.14         | 1,524.16         | 5,944.06          |
| 688                          | 2,488.30         | 2,331.35         | 2,258.91         | 2,303.57         | 9,382.13          |
| 689                          | 1,019.87         | 1,005.59         | 944.65           | 980.21           | 3,950.33          |
| 690                          | 249.39           | 214.97           | 259.98           | 278.14           | 1,002.47          |
| 691                          | 1,150.65         | 1,031.75         | 986.21           | 1,001.10         | 4,169.72          |
| 692                          | 42.44            | 45.40            | 39.17            | 55.00            | 182.00            |
| 693                          | 859.59           | 826.03           | 782.63           | 882.09           | 3,350.35          |
| <b>NE - NEBRASKA - Total</b> | <b>31,178.63</b> | <b>29,875.99</b> | <b>29,465.08</b> | <b>31,109.35</b> | <b>121,629.05</b> |

**STATE: NH - NEW HAMPSHIRE**

| REGISTRANT ZIP CODE 3             | 1ST QUARTER      | 2ND QUARTER      | 3RD QUARTER      | 4TH QUARTER      | TOTAL GRAMS       |
|-----------------------------------|------------------|------------------|------------------|------------------|-------------------|
| 030                               | 8,379.23         | 8,764.26         | 7,987.87         | 8,521.85         | 33,653.21         |
| 031                               | 5,041.75         | 5,124.50         | 4,678.94         | 4,829.05         | 19,674.24         |
| 032                               | 3,165.05         | 3,181.49         | 2,975.09         | 2,979.62         | 12,301.25         |
| 033                               | 2,227.34         | 2,283.32         | 2,197.51         | 2,308.69         | 9,016.86          |
| 034                               | 1,987.81         | 2,002.38         | 1,939.93         | 1,882.91         | 7,813.03          |
| 035                               | 1,920.65         | 1,732.73         | 1,740.31         | 1,701.33         | 7,095.03          |
| 036                               | 107.48           | 114.14           | 97.11            | 82.41            | 401.13            |
| 037                               | 3,347.06         | 3,550.42         | 2,998.19         | 3,253.14         | 13,148.81         |
| 038                               | 7,736.43         | 7,324.42         | 7,234.78         | 7,564.68         | 29,860.30         |
| <b>NH - NEW HAMPSHIRE - Total</b> | <b>33,912.80</b> | <b>34,077.66</b> | <b>31,849.73</b> | <b>33,123.67</b> | <b>132,963.86</b> |

**STATE: NJ - NEW JERSEY**

| REGISTRANT ZIP CODE 3          | 1ST QUARTER      | 2ND QUARTER      | 3RD QUARTER      | 4TH QUARTER      | TOTAL GRAMS       |
|--------------------------------|------------------|------------------|------------------|------------------|-------------------|
| 070                            | 15,908.31        | 15,724.63        | 13,826.19        | 15,928.72        | 61,387.85         |
| 071                            | 1,902.63         | 1,868.93         | 1,538.42         | 1,943.02         | 7,252.99          |
| 072                            | 1,010.07         | 1,030.23         | 829.55           | 952.50           | 3,822.35          |
| 073                            | 1,060.99         | 1,125.76         | 890.91           | 940.81           | 4,018.47          |
| 074                            | 5,380.62         | 4,952.00         | 4,318.48         | 5,193.59         | 19,844.69         |
| 075                            | 904.25           | 845.44           | 684.80           | 787.00           | 3,221.50          |
| 076                            | 4,794.76         | 4,619.96         | 4,086.14         | 4,670.40         | 18,171.27         |
| 077                            | 6,603.98         | 6,302.13         | 5,849.88         | 6,516.55         | 25,272.54         |
| 078                            | 4,652.80         | 4,807.77         | 4,473.65         | 4,416.63         | 18,350.85         |
| 079                            | 4,742.89         | 5,015.01         | 4,496.13         | 4,760.87         | 19,014.90         |
| 080                            | 17,247.21        | 17,321.94        | 15,677.98        | 17,455.67        | 67,702.81         |
| 081                            | 1,558.48         | 1,504.65         | 1,314.49         | 1,502.70         | 5,880.33          |
| 082                            | 2,646.41         | 2,576.52         | 2,591.56         | 2,427.52         | 10,242.01         |
| 083                            | 2,341.38         | 2,362.66         | 2,072.32         | 2,198.36         | 8,974.72          |
| 084                            | 227.01           | 222.28           | 216.86           | 249.90           | 916.04            |
| 085                            | 3,970.68         | 3,858.03         | 3,575.11         | 3,826.70         | 15,230.51         |
| 086                            | 2,901.81         | 2,770.76         | 2,534.11         | 2,577.16         | 10,783.85         |
| 087                            | 4,944.92         | 4,782.65         | 4,624.18         | 4,699.20         | 19,050.95         |
| 088                            | 8,731.70         | 8,558.87         | 7,298.81         | 8,455.21         | 33,044.59         |
| 089                            | 868.20           | 824.70           | 690.28           | 937.43           | 3,320.62          |
| <b>NJ - NEW JERSEY - Total</b> | <b>92,399.11</b> | <b>91,074.92</b> | <b>81,589.86</b> | <b>90,439.94</b> | <b>355,503.83</b> |

**STATE: NM - NEW MEXICO**

| REGISTRANT ZIP CODE 3          | 1ST QUARTER      | 2ND QUARTER      | 3RD QUARTER      | 4TH QUARTER      | TOTAL GRAMS      |
|--------------------------------|------------------|------------------|------------------|------------------|------------------|
| 870                            | 1,400.03         | 1,297.13         | 1,291.66         | 1,329.27         | 5,318.09         |
| 871                            | 8,485.47         | 7,893.06         | 7,519.55         | 7,977.59         | 31,875.67        |
| 873                            | 610.56           | 482.38           | 488.47           | 518.82           | 2,100.23         |
| 874                            | 1,671.01         | 1,477.94         | 1,447.07         | 1,390.23         | 5,986.25         |
| 875                            | 1,905.04         | 1,771.47         | 1,778.47         | 1,911.98         | 7,366.96         |
| 877                            | 296.74           | 265.54           | 257.61           | 247.83           | 1,067.72         |
| 878                            | 163.31           | 133.36           | 101.19           | 97.74            | 495.59           |
| 879                            | 73.67            | 78.95            | 93.22            | 92.70            | 338.54           |
| 880                            | 1,746.59         | 1,706.13         | 1,536.00         | 1,711.64         | 6,700.36         |
| 881                            | 441.06           | 352.84           | 327.98           | 339.30           | 1,461.17         |
| 882                            | 1,855.79         | 1,623.55         | 1,651.83         | 1,764.53         | 6,895.71         |
| 883                            | 584.28           | 563.28           | 658.70           | 594.18           | 2,400.44         |
| 884                            | 112.44           | 115.87           | 107.81           | 98.93            | 435.05           |
| <b>NM - NEW MEXICO - Total</b> | <b>19,346.00</b> | <b>17,761.48</b> | <b>17,259.56</b> | <b>18,074.75</b> | <b>72,441.79</b> |

**STATE: NV - NEVADA**

| REGISTRANT ZIP CODE 3 | 1ST QUARTER | 2ND QUARTER | 3RD QUARTER | 4TH QUARTER | TOTAL GRAMS |
|-----------------------|-------------|-------------|-------------|-------------|-------------|
|-----------------------|-------------|-------------|-------------|-------------|-------------|

|                            |                  |                  |                  |                  |                  |
|----------------------------|------------------|------------------|------------------|------------------|------------------|
| 890                        | 3,320.04         | 3,206.47         | 3,086.45         | 3,265.81         | <b>12,878.77</b> |
| 891                        | 6,911.47         | 6,476.71         | 6,756.14         | 6,571.45         | <b>26,715.77</b> |
| 893                        | 16.08            | 26.29            | 24.56            | 19.20            | <b>86.13</b>     |
| 894                        | 1,611.05         | 1,567.53         | 1,581.43         | 1,693.01         | <b>6,453.02</b>  |
| 895                        | 2,166.94         | 2,127.01         | 2,111.27         | 2,133.02         | <b>8,538.25</b>  |
| 897                        | 576.10           | 457.42           | 485.48           | 414.54           | <b>1,933.55</b>  |
| 898                        | 368.62           | 418.12           | 363.61           | 460.34           | <b>1,610.68</b>  |
| <b>NV - NEVADA - Total</b> | <b>14,970.31</b> | <b>14,279.54</b> | <b>14,408.94</b> | <b>14,557.37</b> | <b>58,216.16</b> |

**STATE: NY - NEW YORK**

| REGISTRANT ZIP CODE 3 | 1ST QUARTER | 2ND QUARTER | 3RD QUARTER | 4TH QUARTER | TOTAL GRAMS      |
|-----------------------|-------------|-------------|-------------|-------------|------------------|
| 100                   | 21,936.58   | 22,564.34   | 19,781.72   | 21,996.60   | <b>86,279.24</b> |
| 101                   | 1,237.44    | 1,372.55    | 1,017.71    | 1,210.33    | <b>4,838.02</b>  |
| 102                   | 168.62      | 146.35      | 129.29      | 141.91      | <b>586.16</b>    |
| 103                   | 2,589.58    | 2,773.21    | 2,331.07    | 2,689.35    | <b>10,383.21</b> |
| 104                   | 7,994.66    | 7,726.05    | 6,394.57    | 6,945.77    | <b>29,061.04</b> |
| 105                   | 10,016.53   | 10,298.45   | 9,054.30    | 10,367.75   | <b>39,737.02</b> |
| 106                   | 1,048.40    | 1,125.96    | 1,079.81    | 1,058.44    | <b>4,312.61</b>  |
| 107                   | 1,771.65    | 1,841.14    | 1,587.16    | 1,734.37    | <b>6,934.32</b>  |
| 108                   | 915.07      | 938.15      | 830.26      | 840.87      | <b>3,524.35</b>  |
| 109                   | 6,872.54    | 6,735.44    | 6,088.60    | 6,663.55    | <b>26,360.13</b> |
| 110                   | 2,911.94    | 2,894.48    | 2,861.49    | 3,322.76    | <b>11,990.68</b> |
| 111                   | 1,195.83    | 1,223.81    | 970.12      | 1,184.26    | <b>4,574.03</b>  |
| 112                   | 12,488.99   | 12,607.32   | 10,363.89   | 11,688.39   | <b>47,148.58</b> |
| 113                   | 4,951.24    | 5,002.08    | 3,815.26    | 4,626.66    | <b>18,395.24</b> |
| 114                   | 2,310.73    | 2,444.59    | 1,872.56    | 2,221.36    | <b>8,849.24</b>  |
| 115                   | 8,481.27    | 8,384.02    | 7,233.68    | 8,088.94    | <b>32,187.92</b> |
| 116                   | 833.50      | 896.32      | 750.30      | 901.51      | <b>3,381.63</b>  |
| 117                   | 19,990.55   | 20,450.54   | 18,019.05   | 19,571.95   | <b>78,032.09</b> |
| 118                   | 1,286.00    | 1,441.11    | 1,178.91    | 1,483.89    | <b>5,389.90</b>  |
| 119                   | 2,779.37    | 2,797.57    | 2,791.22    | 2,640.01    | <b>11,008.17</b> |
| 120                   | 7,534.95    | 7,585.76    | 6,936.53    | 7,230.08    | <b>29,287.32</b> |
| 121                   | 4,764.49    | 4,688.52    | 4,380.33    | 4,995.12    | <b>18,828.46</b> |
| 122                   | 2,758.76    | 2,918.37    | 2,489.78    | 2,797.02    | <b>10,963.93</b> |
| 123                   | 3,217.99    | 3,310.41    | 2,955.21    | 3,154.78    | <b>12,638.40</b> |
| 124                   | 1,835.08    | 1,896.20    | 1,670.87    | 1,639.75    | <b>7,041.90</b>  |
| 125                   | 5,121.71    | 5,131.72    | 4,695.81    | 5,100.54    | <b>20,049.77</b> |
| 126                   | 1,130.84    | 1,135.03    | 869.84      | 1,099.02    | <b>4,234.73</b>  |
| 127                   | 998.71      | 1,103.08    | 931.48      | 937.54      | <b>3,970.81</b>  |
| 128                   | 5,049.95    | 4,896.24    | 4,749.29    | 4,920.85    | <b>19,616.32</b> |
| 129                   | 4,100.64    | 4,011.43    | 4,057.84    | 4,287.35    | <b>16,457.25</b> |



|                              |                   |                   |                   |                   |                   |
|------------------------------|-------------------|-------------------|-------------------|-------------------|-------------------|
| 130                          | 6,534.24          | 6,321.82          | 5,946.63          | 6,367.71          | 25,170.40         |
| 131                          | 2,256.79          | 2,350.27          | 2,077.62          | 2,157.05          | 8,841.74          |
| 132                          | 3,539.86          | 3,395.10          | 3,200.80          | 3,430.05          | 13,565.82         |
| 133                          | 2,159.57          | 2,099.98          | 1,796.46          | 1,984.39          | 8,040.39          |
| 134                          | 2,899.07          | 2,668.58          | 2,515.18          | 2,634.01          | 10,716.84         |
| 135                          | 1,083.84          | 1,015.02          | 993.26            | 1,020.86          | 4,112.98          |
| 136                          | 5,889.70          | 5,722.12          | 5,410.50          | 5,799.55          | 22,821.86         |
| 137                          | 1,368.22          | 1,316.52          | 1,291.33          | 1,382.62          | 5,358.70          |
| 138                          | 2,662.07          | 2,554.28          | 2,369.03          | 2,525.34          | 10,110.72         |
| 139                          | 1,093.16          | 1,066.22          | 1,061.94          | 991.35            | 4,212.67          |
| 140                          | 5,706.63          | 5,667.00          | 5,249.97          | 5,497.29          | 22,120.88         |
| 141                          | 2,676.66          | 2,780.06          | 2,474.89          | 2,687.15          | 10,618.76         |
| 142                          | 7,485.45          | 7,380.35          | 6,976.34          | 7,542.43          | 29,384.58         |
| 143                          | 624.08            | 697.61            | 583.55            | 684.29            | 2,589.52          |
| 144                          | 7,862.87          | 7,598.51          | 6,937.75          | 7,548.05          | 29,947.17         |
| 145                          | 8,100.62          | 7,714.88          | 7,273.14          | 7,835.34          | 30,923.98         |
| 146                          | 12,708.31         | 12,162.37         | 11,536.01         | 12,351.81         | 48,758.49         |
| 147                          | 2,211.40          | 2,107.40          | 2,057.23          | 2,158.56          | 8,534.58          |
| 148                          | 5,420.65          | 5,246.44          | 4,939.13          | 5,452.31          | 21,058.53         |
| 149                          | 1,194.21          | 1,219.21          | 1,043.84          | 1,259.92          | 4,717.18          |
| <b>NY - NEW YORK - Total</b> | <b>231,770.97</b> | <b>231,423.99</b> | <b>207,622.54</b> | <b>226,850.77</b> | <b>897,668.27</b> |

**STATE: OH - OHIO**

| REGISTRANT ZIP CODE 3 | 1ST QUARTER | 2ND QUARTER | 3RD QUARTER | 4TH QUARTER | TOTAL GRAMS |
|-----------------------|-------------|-------------|-------------|-------------|-------------|
| 430                   | 16,679.70   | 16,209.89   | 15,397.91   | 16,570.54   | 64,858.03   |
| 431                   | 8,237.53    | 7,958.01    | 7,679.54    | 8,204.60    | 32,079.68   |
| 432                   | 32,137.99   | 24,846.26   | 9,822.82    | 10,787.47   | 77,594.55   |
| 433                   | 2,833.01    | 2,694.06    | 2,555.47    | 2,681.19    | 10,763.73   |
| 434                   | 2,808.64    | 2,488.33    | 2,541.45    | 2,828.26    | 10,666.68   |
| 435                   | 6,322.40    | 5,981.71    | 5,717.37    | 6,526.43    | 24,547.92   |
| 436                   | 7,682.73    | 6,968.33    | 6,670.02    | 7,242.74    | 28,563.83   |
| 437                   | 2,600.75    | 2,432.28    | 2,339.50    | 2,318.47    | 9,691.00    |
| 438                   | 477.21      | 569.66      | 453.67      | 428.04      | 1,928.58    |
| 439                   | 2,149.49    | 2,179.08    | 1,978.12    | 1,991.87    | 8,298.56    |
| 440                   | 13,561.10   | 13,220.36   | 12,525.15   | 13,660.04   | 52,966.66   |
| 441                   | 16,050.05   | 15,226.20   | 14,614.00   | 15,739.84   | 61,630.09   |
| 442                   | 8,220.51    | 7,965.92    | 7,588.95    | 8,085.15    | 31,860.54   |
| 443                   | 4,052.95    | 3,799.23    | 3,577.69    | 3,769.88    | 15,199.76   |
| 444                   | 3,782.78    | 3,514.59    | 3,325.86    | 3,662.90    | 14,286.12   |
| 445                   | 2,822.07    | 2,861.51    | 2,504.82    | 2,782.17    | 10,970.58   |
| 446                   | 6,187.89    | 5,844.43    | 5,371.45    | 5,642.42    | 23,046.18   |

|                          |                   |                   |                   |                   |                   |
|--------------------------|-------------------|-------------------|-------------------|-------------------|-------------------|
| 447                      | 4,658.74          | 4,403.69          | 4,254.73          | 4,334.52          | 17,651.69         |
| 448                      | 4,728.65          | 4,310.01          | 3,928.73          | 4,386.87          | 17,354.26         |
| 449                      | 1,562.36          | 1,455.12          | 1,400.27          | 1,490.52          | 5,908.27          |
| 450                      | 15,561.54         | 15,296.03         | 14,331.04         | 16,164.32         | 61,352.93         |
| 451                      | 6,460.34          | 6,248.58          | 6,078.31          | 6,502.31          | 25,289.55         |
| 452                      | 19,954.29         | 18,499.28         | 17,911.11         | 19,711.50         | 76,076.17         |
| 453                      | 8,006.84          | 7,329.55          | 7,392.73          | 8,120.74          | 30,849.86         |
| 454                      | 9,085.68          | 8,750.22          | 8,433.76          | 9,264.31          | 35,533.97         |
| 455                      | 2,349.41          | 2,187.22          | 2,191.22          | 2,275.80          | 9,003.65          |
| 456                      | 6,669.12          | 6,433.14          | 5,978.48          | 6,698.77          | 25,779.51         |
| 457                      | 2,496.08          | 2,169.91          | 2,090.62          | 2,332.59          | 9,089.20          |
| 458                      | 5,146.69          | 4,769.80          | 4,509.57          | 5,112.21          | 19,538.28         |
| <b>OH - OHIO - Total</b> | <b>223,286.55</b> | <b>206,612.44</b> | <b>183,164.36</b> | <b>199,316.48</b> | <b>812,379.83</b> |

**STATE: OK - OKLAHOMA**

| REGISTRANT ZIP CODE 3        | 1ST QUARTER      | 2ND QUARTER      | 3RD QUARTER      | 4TH QUARTER      | TOTAL GRAMS       |
|------------------------------|------------------|------------------|------------------|------------------|-------------------|
| 730                          | 9,725.72         | 9,160.75         | 8,639.90         | 9,505.76         | 37,032.13         |
| 731                          | 7,261.92         | 6,750.34         | 6,884.76         | 6,995.19         | 27,892.22         |
| 734                          | 728.55           | 624.19           | 623.88           | 673.95           | 2,650.57          |
| 735                          | 3,357.34         | 3,107.27         | 2,855.65         | 2,879.75         | 12,200.01         |
| 736                          | 793.93           | 707.14           | 718.19           | 795.03           | 3,014.28          |
| 737                          | 1,248.78         | 1,184.15         | 1,237.83         | 1,156.99         | 4,827.75          |
| 738                          | 211.73           | 185.24           | 190.06           | 187.65           | 774.68            |
| 739                          | 56.57            | 50.46            | 47.73            | 52.86            | 207.62            |
| 740                          | 10,734.75        | 9,587.78         | 9,358.06         | 9,828.30         | 39,508.90         |
| 741                          | 6,165.34         | 5,399.74         | 5,235.34         | 5,423.54         | 22,223.96         |
| 743                          | 1,916.10         | 1,637.30         | 1,531.38         | 1,603.19         | 6,687.97          |
| 744                          | 3,161.82         | 2,683.50         | 2,794.24         | 2,924.46         | 11,564.01         |
| 745                          | 776.46           | 755.82           | 663.40           | 730.27           | 2,925.94          |
| 746                          | 740.66           | 667.72           | 622.95           | 717.35           | 2,748.69          |
| 747                          | 805.67           | 688.82           | 725.40           | 814.08           | 3,033.97          |
| 748                          | 1,721.98         | 1,502.51         | 1,510.55         | 1,712.65         | 6,447.68          |
| 749                          | 726.10           | 631.20           | 729.06           | 712.05           | 2,798.41          |
| <b>OK - OKLAHOMA - Total</b> | <b>50,133.42</b> | <b>45,323.93</b> | <b>44,368.37</b> | <b>46,713.07</b> | <b>186,538.79</b> |

**STATE: OR - OREGON**

| REGISTRANT ZIP CODE 3 | 1ST QUARTER | 2ND QUARTER | 3RD QUARTER | 4TH QUARTER | TOTAL GRAMS |
|-----------------------|-------------|-------------|-------------|-------------|-------------|
| 970                   | 12,771.24   | 12,558.96   | 11,827.10   | 12,381.80   | 49,539.10   |
| 971                   | 5,484.21    | 5,354.89    | 5,292.30    | 5,397.49    | 21,528.89   |
| 972                   | 16,040.27   | 16,277.90   | 15,357.42   | 16,299.86   | 63,975.45   |
| 973                   | 11,200.88   | 11,109.54   | 10,341.47   | 11,163.48   | 43,815.36   |
| 974                   | 7,193.99    | 7,712.05    | 7,065.61    | 7,458.68    | 29,430.34   |

|                            |                  |                  |                  |                  |                   |
|----------------------------|------------------|------------------|------------------|------------------|-------------------|
| 975                        | 3,200.86         | 3,507.10         | 3,098.31         | 3,258.30         | <b>13,064.57</b>  |
| 976                        | 625.63           | 699.60           | 592.93           | 588.54           | <b>2,506.70</b>   |
| 977                        | 3,160.48         | 3,345.63         | 3,127.24         | 3,269.29         | <b>12,902.65</b>  |
| 978                        | 1,735.14         | 1,779.38         | 1,623.17         | 1,691.07         | <b>6,828.77</b>   |
| 979                        | 527.76           | 554.34           | 566.25           | 561.53           | <b>2,209.89</b>   |
| <b>OR - OREGON - Total</b> | <b>61,940.45</b> | <b>62,899.40</b> | <b>58,891.81</b> | <b>62,070.04</b> | <b>245,801.71</b> |

**STATE: PA - PENNSYLVANIA**

| REGISTRANT ZIP CODE 3 | 1ST QUARTER | 2ND QUARTER | 3RD QUARTER | 4TH QUARTER | TOTAL GRAMS      |
|-----------------------|-------------|-------------|-------------|-------------|------------------|
| 150                   | 7,550.49    | 7,469.57    | 6,937.50    | 7,674.82    | <b>29,632.39</b> |
| 151                   | 6,721.67    | 6,664.09    | 5,967.99    | 6,051.31    | <b>25,405.06</b> |
| 152                   | 11,792.52   | 11,646.07   | 10,823.93   | 11,853.27   | <b>46,115.79</b> |
| 153                   | 3,426.09    | 3,412.84    | 3,203.83    | 3,386.46    | <b>13,429.22</b> |
| 154                   | 1,466.16    | 1,514.06    | 1,350.25    | 1,470.85    | <b>5,801.31</b>  |
| 155                   | 1,167.80    | 1,136.04    | 1,076.59    | 1,096.50    | <b>4,476.93</b>  |
| 156                   | 5,359.71    | 5,209.86    | 4,604.32    | 5,101.96    | <b>20,275.85</b> |
| 157                   | 2,358.17    | 2,212.46    | 2,048.08    | 2,142.53    | <b>8,761.24</b>  |
| 158                   | 2,208.94    | 2,032.52    | 2,043.74    | 2,140.54    | <b>8,425.74</b>  |
| 159                   | 2,341.18    | 2,181.19    | 2,049.14    | 2,274.94    | <b>8,846.45</b>  |
| 160                   | 3,914.71    | 3,775.47    | 3,554.81    | 3,739.37    | <b>14,984.36</b> |
| 161                   | 4,076.79    | 3,865.26    | 3,507.96    | 3,886.52    | <b>15,336.53</b> |
| 162                   | 1,560.66    | 1,441.02    | 1,350.72    | 1,544.43    | <b>5,896.83</b>  |
| 163                   | 2,316.99    | 2,155.39    | 2,041.49    | 2,130.08    | <b>8,643.95</b>  |
| 164                   | 1,145.14    | 1,168.86    | 1,018.14    | 1,153.84    | <b>4,485.97</b>  |
| 165                   | 4,631.98    | 4,311.69    | 4,070.84    | 4,295.29    | <b>17,309.79</b> |
| 166                   | 3,659.39    | 3,473.73    | 3,170.34    | 3,415.45    | <b>13,718.90</b> |
| 167                   | 795.71      | 772.79      | 767.72      | 766.88      | <b>3,103.10</b>  |
| 168                   | 3,547.75    | 3,208.36    | 3,097.94    | 3,270.79    | <b>13,124.84</b> |
| 169                   | 709.07      | 745.45      | 703.55      | 750.19      | <b>2,908.25</b>  |
| 170                   | 14,819.31   | 14,704.39   | 13,926.97   | 14,202.33   | <b>57,653.00</b> |
| 171                   | 3,160.47    | 2,945.65    | 2,809.29    | 2,809.39    | <b>11,724.80</b> |
| 172                   | 3,877.48    | 3,630.92    | 3,532.91    | 3,661.89    | <b>14,703.20</b> |
| 173                   | 6,272.16    | 6,079.46    | 5,879.48    | 6,111.34    | <b>24,342.44</b> |
| 174                   | 4,745.18    | 4,783.62    | 4,286.68    | 4,512.26    | <b>18,327.74</b> |
| 175                   | 5,031.34    | 4,747.46    | 4,414.36    | 4,595.37    | <b>18,788.54</b> |
| 176                   | 4,404.54    | 4,441.92    | 3,953.93    | 4,359.60    | <b>17,159.99</b> |
| 177                   | 3,073.96    | 2,879.94    | 2,780.08    | 2,795.99    | <b>11,529.97</b> |
| 178                   | 3,626.52    | 3,264.60    | 3,094.91    | 3,129.08    | <b>13,115.10</b> |
| 179                   | 1,370.98    | 1,219.69    | 1,130.66    | 1,301.20    | <b>5,022.52</b>  |
| 180                   | 5,844.80    | 5,753.22    | 5,198.73    | 5,614.09    | <b>22,410.84</b> |
| 181                   | 2,826.54    | 3,014.62    | 2,734.47    | 2,695.63    | <b>11,271.26</b> |

|                                  |                   |                   |                   |                   |                   |
|----------------------------------|-------------------|-------------------|-------------------|-------------------|-------------------|
| 182                              | 1,383.16          | 1,332.96          | 1,180.49          | 1,331.62          | 5,228.24          |
| 183                              | 1,522.69          | 1,571.89          | 1,378.85          | 1,541.66          | 6,015.09          |
| 184                              | 2,191.09          | 2,271.91          | 2,142.25          | 2,204.73          | 8,809.98          |
| 185                              | 2,489.90          | 2,542.46          | 2,383.00          | 2,590.64          | 10,006.00         |
| 186                              | 2,180.51          | 2,051.76          | 1,980.25          | 2,078.20          | 8,290.71          |
| 187                              | 25,512.12         | 24,041.18         | 22,890.97         | 24,516.72         | 96,961.00         |
| 188                              | 988.50            | 1,011.50          | 947.11            | 1,121.33          | 4,068.45          |
| 189                              | 5,694.99          | 5,772.21          | 5,258.58          | 5,952.43          | 22,678.20         |
| 190                              | 17,515.02         | 17,596.52         | 16,601.06         | 18,208.82         | 69,921.42         |
| 191                              | 13,291.42         | 13,299.17         | 12,254.10         | 13,453.71         | 52,298.41         |
| 193                              | 8,666.57          | 8,389.39          | 7,880.74          | 8,406.12          | 33,342.82         |
| 194                              | 8,528.91          | 8,168.16          | 7,722.47          | 8,258.60          | 32,678.15         |
| 195                              | 2,509.54          | 2,534.00          | 2,370.73          | 2,637.07          | 10,051.34         |
| 196                              | 3,582.37          | 3,430.77          | 3,355.47          | 3,638.03          | 14,006.63         |
| <b>PA - PENNSYLVANIA - Total</b> | <b>225,860.97</b> | <b>219,876.07</b> | <b>205,477.41</b> | <b>219,873.88</b> | <b>871,088.33</b> |

**STATE: PR - PUERTO RICO**

| REGISTRANT ZIP CODE 3           | 1ST QUARTER      | 2ND QUARTER      | 3RD QUARTER      | 4TH QUARTER      | TOTAL GRAMS      |
|---------------------------------|------------------|------------------|------------------|------------------|------------------|
| 006                             | 3,900.56         | 3,767.79         | 3,520.92         | 3,532.39         | 14,721.67        |
| 007                             | 4,482.17         | 4,290.90         | 3,888.25         | 4,279.27         | 16,940.59        |
| 009                             | 6,819.13         | 6,561.13         | 5,964.13         | 6,383.34         | 25,727.73        |
| <b>PR - PUERTO RICO - Total</b> | <b>15,201.86</b> | <b>14,619.82</b> | <b>13,373.30</b> | <b>14,194.99</b> | <b>57,389.98</b> |

**STATE: RI - RHODE ISLAND**

| REGISTRANT ZIP CODE 3            | 1ST QUARTER      | 2ND QUARTER      | 3RD QUARTER      | 4TH QUARTER      | TOTAL GRAMS      |
|----------------------------------|------------------|------------------|------------------|------------------|------------------|
| 028                              | 12,926.65        | 12,726.46        | 11,517.78        | 12,090.50        | 49,261.39        |
| 029                              | 6,332.95         | 5,968.58         | 5,218.21         | 5,756.56         | 23,276.31        |
| <b>RI - RHODE ISLAND - Total</b> | <b>19,259.60</b> | <b>18,695.05</b> | <b>16,735.99</b> | <b>17,847.06</b> | <b>72,537.70</b> |

**STATE: SC - SOUTH CAROLINA**

| REGISTRANT ZIP CODE 3              | 1ST QUARTER      | 2ND QUARTER      | 3RD QUARTER      | 4TH QUARTER      | TOTAL GRAMS       |
|------------------------------------|------------------|------------------|------------------|------------------|-------------------|
| 290                                | 6,987.60         | 6,442.73         | 6,261.86         | 6,838.60         | 26,530.79         |
| 291                                | 5,609.82         | 5,493.27         | 4,747.60         | 5,212.71         | 21,063.39         |
| 292                                | 6,333.92         | 6,053.01         | 5,718.87         | 5,765.50         | 23,871.30         |
| 293                                | 7,774.90         | 7,310.96         | 6,951.07         | 7,531.21         | 29,568.14         |
| 294                                | 18,745.80        | 17,446.63        | 16,552.44        | 17,729.38        | 70,474.25         |
| 295                                | 11,110.91        | 10,496.48        | 9,374.25         | 10,600.01        | 41,581.64         |
| 296                                | 19,444.61        | 18,421.65        | 18,180.06        | 19,530.25        | 75,576.57         |
| 297                                | 7,530.54         | 7,255.92         | 6,603.19         | 7,488.46         | 28,878.11         |
| 298                                | 3,155.73         | 2,882.49         | 2,851.58         | 2,960.96         | 11,850.76         |
| 299                                | 2,922.09         | 2,591.48         | 2,480.68         | 2,657.05         | 10,651.30         |
| <b>SC - SOUTH CAROLINA - Total</b> | <b>89,615.93</b> | <b>84,394.62</b> | <b>79,721.60</b> | <b>86,314.11</b> | <b>340,046.25</b> |

**STATE: SD - SOUTH DAKOTA**

| REGISTRANT ZIP CODE 3            | 1ST QUARTER      | 2ND QUARTER      | 3RD QUARTER      | 4TH QUARTER      | TOTAL GRAMS      |
|----------------------------------|------------------|------------------|------------------|------------------|------------------|
| 570                              | 2,680.26         | 2,522.11         | 2,517.40         | 2,767.58         | 10,487.34        |
| 571                              | 11,171.75        | 9,380.73         | 9,952.43         | 9,852.18         | 40,357.08        |
| 572                              | 1,135.93         | 1,000.16         | 1,039.27         | 1,054.39         | 4,229.75         |
| 573                              | 1,724.14         | 1,491.94         | 1,541.29         | 1,671.72         | 6,429.09         |
| 574                              | 1,179.18         | 1,208.85         | 1,075.75         | 1,187.86         | 4,651.64         |
| 575                              | 972.24           | 682.96           | 815.87           | 926.64           | 3,397.71         |
| 576                              | 164.16           | 159.19           | 173.24           | 200.73           | 697.32           |
| 577                              | 3,015.43         | 2,831.30         | 2,862.09         | 2,739.12         | 11,447.93        |
| <b>SD - SOUTH DAKOTA - Total</b> | <b>22,043.10</b> | <b>19,277.23</b> | <b>19,977.33</b> | <b>20,400.21</b> | <b>81,697.86</b> |

**STATE: TN - TENNESSEE**

| REGISTRANT ZIP CODE 3         | 1ST QUARTER      | 2ND QUARTER      | 3RD QUARTER      | 4TH QUARTER      | TOTAL GRAMS       |
|-------------------------------|------------------|------------------|------------------|------------------|-------------------|
| 370                           | 12,985.63        | 11,574.59        | 11,847.99        | 11,920.34        | 48,328.53         |
| 371                           | 8,614.16         | 8,335.22         | 7,951.43         | 8,417.49         | 33,318.31         |
| 372                           | 5,592.70         | 5,374.80         | 5,247.89         | 5,518.82         | 21,734.21         |
| 373                           | 8,063.61         | 7,464.33         | 7,732.54         | 8,015.59         | 31,276.07         |
| 374                           | 3,557.79         | 3,299.29         | 2,992.04         | 3,275.93         | 13,125.05         |
| 376                           | 4,887.93         | 4,575.61         | 4,447.26         | 4,482.80         | 18,393.60         |
| 377                           | 4,413.98         | 4,216.21         | 4,212.06         | 4,449.83         | 17,292.08         |
| 378                           | 6,801.23         | 6,446.54         | 6,622.28         | 6,783.73         | 26,653.79         |
| 379                           | 6,078.29         | 5,833.66         | 5,884.89         | 6,133.44         | 23,930.27         |
| 380                           | 6,127.57         | 5,817.66         | 5,361.03         | 5,943.30         | 23,249.57         |
| 381                           | 7,385.75         | 7,174.36         | 6,917.11         | 7,380.94         | 28,858.15         |
| 382                           | 1,546.02         | 1,438.52         | 1,392.82         | 1,478.15         | 5,855.51          |
| 383                           | 3,617.90         | 3,353.43         | 3,389.37         | 3,498.49         | 13,859.19         |
| 384                           | 2,002.32         | 1,843.95         | 1,802.71         | 1,798.02         | 7,446.99          |
| 385                           | 2,033.85         | 1,911.56         | 1,906.24         | 1,991.53         | 7,843.17          |
| <b>TN - TENNESSEE - Total</b> | <b>83,708.72</b> | <b>78,659.73</b> | <b>77,707.66</b> | <b>81,088.40</b> | <b>321,164.51</b> |

**STATE: TX - TEXAS**

| REGISTRANT ZIP CODE 3 | 1ST QUARTER | 2ND QUARTER | 3RD QUARTER | 4TH QUARTER | TOTAL GRAMS |
|-----------------------|-------------|-------------|-------------|-------------|-------------|
| 750                   | 31,472.98   | 30,588.16   | 27,952.43   | 31,189.04   | 121,202.62  |
| 751                   | 8,716.65    | 8,418.93    | 7,558.59    | 8,389.10    | 33,083.27   |
| 752                   | 11,630.17   | 11,588.42   | 10,042.09   | 11,519.54   | 44,780.22   |
| 753                   | 34.24       | 39.34       | 39.08       | 46.61       | 159.28      |
| 754                   | 5,299.41    | 4,993.19    | 4,529.64    | 5,131.01    | 19,953.25   |
| 755                   | 1,446.92    | 1,244.61    | 1,323.97    | 1,396.91    | 5,412.41    |
| 756                   | 4,348.50    | 4,141.31    | 3,718.72    | 4,215.28    | 16,423.81   |
| 757                   | 5,357.99    | 5,018.99    | 4,720.77    | 5,233.53    | 20,331.27   |
| 758                   | 1,176.45    | 1,127.21    | 1,067.45    | 1,188.69    | 4,559.81    |
| 759                   | 4,438.59    | 4,202.76    | 3,915.29    | 4,323.36    | 16,880.00   |

|                           |                   |                   |                   |                   |                     |
|---------------------------|-------------------|-------------------|-------------------|-------------------|---------------------|
| 760                       | 17,906.20         | 16,977.07         | 16,013.74         | 17,140.55         | 68,037.56           |
| 761                       | 10,636.33         | 10,017.63         | 9,107.56          | 10,406.24         | 40,167.75           |
| 762                       | 7,975.55          | 7,579.75          | 7,149.69          | 7,907.73          | 30,612.72           |
| 763                       | 3,685.54          | 3,311.39          | 3,386.84          | 3,566.04          | 13,949.80           |
| 764                       | 1,518.25          | 1,302.60          | 1,200.21          | 1,437.11          | 5,458.17            |
| 765                       | 9,935.10          | 9,112.19          | 8,712.06          | 9,404.63          | 37,163.98           |
| 766                       | 1,430.94          | 1,347.80          | 1,356.81          | 1,352.13          | 5,487.68            |
| 767                       | 4,222.29          | 3,778.05          | 3,533.32          | 4,142.18          | 15,675.84           |
| 768                       | 1,342.27          | 1,331.70          | 1,103.20          | 1,371.13          | 5,148.30            |
| 769                       | 2,789.78          | 2,359.00          | 2,026.80          | 2,461.04          | 9,636.62            |
| 770                       | 23,910.55         | 23,604.70         | 21,214.45         | 24,047.76         | 92,777.47           |
| 772                       | 0                 | 1.73              | 0                 | 2.59              | 4.32                |
| 773                       | 17,470.86         | 16,849.65         | 15,525.75         | 17,690.33         | 67,536.60           |
| 774                       | 17,772.41         | 16,448.11         | 15,161.64         | 17,681.85         | 67,064.01           |
| 775                       | 15,954.91         | 15,592.12         | 14,031.59         | 16,351.45         | 61,930.07           |
| 776                       | 3,693.73          | 3,375.51          | 3,009.32          | 3,388.76          | 13,467.32           |
| 777                       | 1,496.76          | 1,488.53          | 1,433.22          | 1,582.33          | 6,000.84            |
| 778                       | 4,796.52          | 4,327.32          | 4,123.60          | 4,694.82          | 17,942.27           |
| 779                       | 2,436.74          | 2,198.32          | 2,010.15          | 2,311.64          | 8,956.84            |
| 780                       | 5,645.23          | 5,147.42          | 5,159.25          | 5,951.51          | 21,903.40           |
| 781                       | 6,021.24          | 6,035.98          | 5,726.25          | 6,132.63          | 23,916.10           |
| 782                       | 25,765.48         | 25,584.48         | 23,082.65         | 25,363.43         | 99,796.04           |
| 783                       | 3,062.21          | 2,828.29          | 2,630.96          | 3,004.67          | 11,526.13           |
| 784                       | 5,603.86          | 5,362.25          | 4,846.92          | 5,735.89          | 21,548.92           |
| 785                       | 11,526.36         | 10,719.89         | 9,494.70          | 10,233.29         | 41,974.24           |
| 786                       | 12,741.16         | 12,546.21         | 11,515.43         | 13,113.30         | 49,916.10           |
| 787                       | 12,822.38         | 12,596.44         | 11,734.08         | 13,417.45         | 50,570.36           |
| 788                       | 1,483.50          | 1,355.22          | 1,207.21          | 1,317.32          | 5,363.24            |
| 789                       | 714.96            | 671.25            | 689.69            | 777.00            | 2,852.91            |
| 790                       | 1,394.56          | 1,262.68          | 1,101.82          | 1,343.29          | 5,102.36            |
| 791                       | 2,318.67          | 2,393.48          | 2,175.76          | 2,425.02          | 9,312.93            |
| 792                       | 335.95            | 297.69            | 264.02            | 288.24            | 1,185.90            |
| 793                       | 1,000.27          | 1,080.50          | 891.15            | 1,046.82          | 4,018.74            |
| 794                       | 5,221.63          | 4,935.90          | 4,501.69          | 4,798.98          | 19,458.20           |
| 795                       | 1,054.97          | 1,060.32          | 988.03            | 1,066.70          | 4,170.03            |
| 796                       | 3,472.24          | 3,253.42          | 2,991.45          | 3,348.16          | 13,065.27           |
| 797                       | 4,504.16          | 4,123.82          | 3,983.48          | 4,363.73          | 16,975.19           |
| 798                       | 247.30            | 214.88            | 233.13            | 203.38            | 898.69              |
| 799                       | 7,752.46          | 7,665.17          | 7,163.32          | 7,692.07          | 30,273.01           |
| <b>TX - TEXAS - Total</b> | <b>335,585.23</b> | <b>321,501.38</b> | <b>295,348.98</b> | <b>331,196.25</b> | <b>1,283,631.84</b> |

**STATE: UT - UTAH**

| REGISTRANT ZIP CODE 3    | 1ST QUARTER      | 2ND QUARTER      | 3RD QUARTER      | 4TH QUARTER      | TOTAL GRAMS       |
|--------------------------|------------------|------------------|------------------|------------------|-------------------|
| 840                      | 24,446.75        | 23,109.54        | 22,942.92        | 24,535.78        | 95,034.99         |
| 841                      | 9,086.95         | 8,761.24         | 8,466.73         | 9,198.50         | 35,513.42         |
| 843                      | 2,162.31         | 2,136.84         | 2,028.94         | 2,338.37         | 8,666.45          |
| 844                      | 2,881.51         | 2,885.05         | 2,575.00         | 2,952.76         | 11,294.31         |
| 845                      | 581.05           | 659.94           | 501.05           | 584.72           | 2,326.76          |
| 846                      | 4,827.85         | 4,544.14         | 4,568.53         | 4,959.88         | 18,900.40         |
| 847                      | 3,187.35         | 3,024.17         | 2,822.76         | 2,933.23         | 11,967.52         |
| <b>UT - UTAH - Total</b> | <b>47,173.78</b> | <b>45,120.91</b> | <b>43,905.93</b> | <b>47,503.23</b> | <b>183,703.86</b> |

**STATE: VA - VIRGINIA**

| REGISTRANT ZIP CODE 3 | 1ST QUARTER | 2ND QUARTER | 3RD QUARTER | 4TH QUARTER | TOTAL GRAMS |
|-----------------------|-------------|-------------|-------------|-------------|-------------|
| 201                   | 12,238.57   | 12,124.01   | 11,499.94   | 11,953.88   | 47,816.39   |
| 220                   | 9,083.47    | 9,387.98    | 8,958.31    | 8,564.46    | 35,994.22   |
| 221                   | 5,550.86    | 5,656.51    | 5,934.67    | 5,379.41    | 22,521.46   |
| 222                   | 3,063.01    | 2,741.86    | 2,690.51    | 2,724.23    | 11,219.60   |
| 223                   | 3,452.92    | 3,424.49    | 2,900.68    | 3,430.24    | 13,208.33   |
| 224                   | 4,715.09    | 4,359.31    | 4,195.49    | 4,624.71    | 17,894.61   |
| 225                   | 2,389.73    | 2,348.90    | 2,073.65    | 2,278.61    | 9,090.88    |
| 226                   | 2,931.38    | 2,797.48    | 2,897.15    | 3,143.94    | 11,769.95   |
| 227                   | 926.30      | 947.08      | 841.56      | 914.61      | 3,629.54    |
| 228                   | 1,910.31    | 1,976.90    | 1,845.34    | 1,949.91    | 7,682.46    |
| 229                   | 6,153.40    | 5,780.26    | 5,885.54    | 6,027.77    | 23,846.97   |
| 230                   | 3,685.49    | 3,508.95    | 3,366.37    | 3,703.62    | 14,264.42   |
| 231                   | 8,284.98    | 7,919.97    | 7,194.43    | 8,328.14    | 31,727.52   |
| 232                   | 9,692.67    | 9,449.04    | 8,471.19    | 8,672.96    | 36,285.86   |
| 233                   | 5,961.90    | 5,936.98    | 4,791.06    | 5,514.89    | 22,204.83   |
| 234                   | 12,375.21   | 12,102.12   | 10,942.13   | 11,700.85   | 47,120.30   |
| 235                   | 3,338.12    | 3,105.64    | 2,990.73    | 3,207.18    | 12,641.67   |
| 236                   | 7,684.87    | 7,098.30    | 7,013.40    | 6,991.66    | 28,788.24   |
| 237                   | 3,365.06    | 2,975.12    | 3,079.02    | 1,971.93    | 11,391.13   |
| 238                   | 4,849.98    | 4,885.39    | 3,994.97    | 4,850.73    | 18,581.07   |
| 239                   | 1,274.71    | 1,141.30    | 1,191.02    | 1,300.93    | 4,907.96    |
| 240                   | 5,467.42    | 5,301.84    | 5,220.96    | 5,827.86    | 21,818.08   |
| 241                   | 3,630.25    | 3,143.29    | 3,280.48    | 3,370.05    | 13,424.07   |
| 242                   | 2,315.14    | 2,154.06    | 2,083.53    | 2,122.67    | 8,675.40    |
| 243                   | 1,888.60    | 1,786.47    | 1,725.44    | 1,927.64    | 7,328.15    |
| 244                   | 2,516.66    | 2,374.64    | 2,310.95    | 2,488.46    | 9,690.71    |
| 245                   | 6,149.00    | 5,715.88    | 5,507.01    | 5,727.48    | 23,099.36   |
| 246                   | 1,054.84    | 941.00      | 899.21      | 1,037.52    | 3,932.56    |

|                              |                   |                   |                   |                   |                   |
|------------------------------|-------------------|-------------------|-------------------|-------------------|-------------------|
| <b>VA - VIRGINIA - Total</b> | <b>135,949.94</b> | <b>131,084.77</b> | <b>123,784.72</b> | <b>129,736.33</b> | <b>520,555.76</b> |
|------------------------------|-------------------|-------------------|-------------------|-------------------|-------------------|

**STATE: VI - VIRGIN ISLANDS**

| REGISTRANT ZIP CODE 3              | 1ST QUARTER   | 2ND QUARTER   | 3RD QUARTER   | 4TH QUARTER   | TOTAL GRAMS   |
|------------------------------------|---------------|---------------|---------------|---------------|---------------|
| 008                                | 135.03        | 159.83        | 132.68        | 158.62        | 586.16        |
| <b>VI - VIRGIN ISLANDS - Total</b> | <b>135.03</b> | <b>159.83</b> | <b>132.68</b> | <b>158.62</b> | <b>586.16</b> |

**STATE: VT - VERMONT**

| REGISTRANT ZIP CODE 3       | 1ST QUARTER      | 2ND QUARTER      | 3RD QUARTER      | 4TH QUARTER      | TOTAL GRAMS      |
|-----------------------------|------------------|------------------|------------------|------------------|------------------|
| 050                         | 1,550.94         | 1,472.29         | 1,342.75         | 1,357.62         | 5,723.61         |
| 051                         | 816.19           | 750.60           | 797.12           | 857.48           | 3,221.40         |
| 052                         | 1,329.16         | 1,297.38         | 1,241.39         | 1,250.51         | 5,118.45         |
| 053                         | 1,168.04         | 1,277.56         | 1,013.72         | 1,195.24         | 4,654.56         |
| 054                         | 6,470.35         | 6,435.62         | 6,067.10         | 6,572.34         | 25,545.41        |
| 056                         | 3,356.29         | 3,267.41         | 3,315.36         | 3,227.77         | 13,166.83        |
| 057                         | 2,407.07         | 2,399.96         | 2,194.78         | 2,508.53         | 9,510.34         |
| 058                         | 2,015.42         | 1,988.68         | 1,992.50         | 1,988.19         | 7,984.80         |
| <b>VT - VERMONT - Total</b> | <b>19,113.46</b> | <b>18,889.50</b> | <b>17,964.74</b> | <b>18,957.69</b> | <b>74,925.40</b> |

**STATE: WA - WASHINGTON**

| REGISTRANT ZIP CODE 3          | 1ST QUARTER       | 2ND QUARTER       | 3RD QUARTER       | 4TH QUARTER       | TOTAL GRAMS       |
|--------------------------------|-------------------|-------------------|-------------------|-------------------|-------------------|
| 980                            | 24,600.46         | 24,657.67         | 22,386.53         | 24,524.72         | 96,169.38         |
| 981                            | 13,358.06         | 13,737.71         | 12,761.44         | 13,816.14         | 53,673.35         |
| 982                            | 15,846.53         | 15,543.26         | 14,641.06         | 15,590.95         | 61,621.80         |
| 983                            | 12,827.83         | 12,713.81         | 11,927.93         | 12,283.13         | 49,752.70         |
| 984                            | 7,945.60          | 7,582.80          | 6,871.99          | 7,366.60          | 29,766.99         |
| 985                            | 7,460.74          | 7,666.04          | 7,000.78          | 7,516.81          | 29,644.38         |
| 986                            | 9,195.02          | 9,170.53          | 8,369.46          | 9,053.79          | 35,788.80         |
| 988                            | 2,559.50          | 2,650.76          | 2,441.32          | 2,607.81          | 10,259.37         |
| 989                            | 3,548.72          | 3,421.65          | 3,081.33          | 3,501.78          | 13,553.48         |
| 990                            | 1,916.52          | 1,797.36          | 1,718.91          | 1,837.75          | 7,270.54          |
| 991                            | 1,304.97          | 1,227.71          | 1,189.06          | 1,283.82          | 5,005.57          |
| 992                            | 8,253.55          | 8,309.89          | 7,595.21          | 8,475.73          | 32,634.39         |
| 993                            | 5,211.72          | 5,304.56          | 4,853.13          | 5,003.03          | 20,372.44         |
| 994                            | 585.39            | 513.96            | 465.08            | 550.00            | 2,114.43          |
| <b>WA - WASHINGTON - Total</b> | <b>114,614.62</b> | <b>114,297.71</b> | <b>105,303.23</b> | <b>113,412.05</b> | <b>447,627.62</b> |

**STATE: WI - WISCONSIN**

| REGISTRANT ZIP CODE 3 | 1ST QUARTER | 2ND QUARTER | 3RD QUARTER | 4TH QUARTER | TOTAL GRAMS |
|-----------------------|-------------|-------------|-------------|-------------|-------------|
| 530                   | 12,950.08   | 11,941.30   | 11,687.54   | 12,617.38   | 49,196.30   |
| 531                   | 11,737.50   | 10,884.26   | 10,503.24   | 11,217.36   | 44,342.36   |
| 532                   | 12,365.30   | 11,006.60   | 10,152.96   | 11,626.26   | 45,151.13   |
| 534                   | 2,296.92    | 2,333.84    | 2,167.49    | 2,117.47    | 8,915.71    |
| 535                   | 10,749.41   | 9,930.34    | 9,685.65    | 10,084.97   | 40,450.37   |



|                               |                   |                   |                  |                   |                   |
|-------------------------------|-------------------|-------------------|------------------|-------------------|-------------------|
| 537                           | 6,386.68          | 6,084.31          | 6,013.76         | 6,341.21          | 24,825.96         |
| 538                           | 1,053.93          | 857.35            | 852.32           | 988.88            | 3,752.48          |
| 539                           | 3,726.60          | 3,395.62          | 3,259.13         | 3,301.08          | 13,682.43         |
| 540                           | 2,552.15          | 2,414.66          | 2,217.89         | 2,332.60          | 9,517.29          |
| 541                           | 4,092.14          | 3,866.50          | 3,809.61         | 3,959.99          | 15,728.23         |
| 542                           | 2,303.57          | 2,069.12          | 2,079.46         | 2,007.95          | 8,460.10          |
| 543                           | 3,762.34          | 3,712.03          | 3,603.76         | 3,778.28          | 14,856.41         |
| 544                           | 7,801.44          | 7,029.62          | 6,717.78         | 7,377.53          | 28,926.36         |
| 545                           | 1,757.10          | 1,579.62          | 1,541.40         | 1,518.30          | 6,396.43          |
| 546                           | 5,677.44          | 5,234.05          | 4,902.32         | 5,297.49          | 21,111.29         |
| 547                           | 5,981.53          | 5,258.52          | 4,781.85         | 5,540.11          | 21,562.01         |
| 548                           | 3,146.76          | 2,713.24          | 2,705.69         | 2,728.27          | 11,293.96         |
| 549                           | 10,718.34         | 10,164.77         | 9,684.38         | 10,273.20         | 40,840.70         |
| <b>WI - WISCONSIN - Total</b> | <b>109,059.24</b> | <b>100,475.74</b> | <b>96,366.22</b> | <b>103,108.32</b> | <b>409,009.53</b> |

**STATE: WV - WEST VIRGINIA**

| REGISTRANT ZIP CODE 3             | 1ST QUARTER      | 2ND QUARTER      | 3RD QUARTER      | 4TH QUARTER      | TOTAL GRAMS       |
|-----------------------------------|------------------|------------------|------------------|------------------|-------------------|
| 247                               | 1,096.94         | 1,017.81         | 959.08           | 949.59           | 4,023.42          |
| 248                               | 467.93           | 338.66           | 391.41           | 320.44           | 1,518.44          |
| 249                               | 736.17           | 730.19           | 656.86           | 651.23           | 2,774.44          |
| 250                               | 1,152.95         | 1,046.45         | 1,008.37         | 1,078.91         | 4,286.68          |
| 251                               | 963.39           | 909.65           | 927.29           | 997.80           | 3,798.13          |
| 252                               | 755.38           | 730.72           | 720.74           | 693.07           | 2,899.92          |
| 253                               | 3,114.14         | 2,622.49         | 2,548.47         | 2,600.88         | 10,885.98         |
| 254                               | 2,934.34         | 2,902.06         | 2,821.58         | 2,549.30         | 11,207.28         |
| 255                               | 2,882.04         | 3,021.11         | 2,578.07         | 2,810.83         | 11,292.06         |
| 256                               | 778.96           | 663.22           | 644.42           | 796.28           | 2,882.88          |
| 257                               | 2,481.98         | 2,261.24         | 2,063.22         | 2,429.19         | 9,235.63          |
| 258                               | 2,102.43         | 2,025.17         | 1,743.11         | 1,792.33         | 7,663.03          |
| 259                               | 738.30           | 710.22           | 614.25           | 654.42           | 2,717.19          |
| 260                               | 2,175.97         | 1,831.60         | 1,744.60         | 1,828.06         | 7,580.24          |
| 261                               | 1,985.20         | 2,009.87         | 1,763.96         | 1,874.79         | 7,633.82          |
| 262                               | 976.45           | 914.26           | 803.91           | 809.77           | 3,504.39          |
| 263                               | 1,489.49         | 1,415.90         | 1,378.71         | 1,375.14         | 5,659.24          |
| 264                               | 501.76           | 445.27           | 429.73           | 381.57           | 1,758.33          |
| 265                               | 3,064.59         | 3,016.88         | 2,961.26         | 3,083.96         | 12,126.69         |
| 266                               | 450.35           | 442.47           | 412.02           | 398.42           | 1,703.26          |
| 267                               | 878.03           | 840.34           | 810.16           | 791.71           | 3,320.24          |
| 268                               | 610.28           | 644.38           | 491.48           | 525.24           | 2,271.38          |
| <b>WV - WEST VIRGINIA - Total</b> | <b>32,337.10</b> | <b>30,539.97</b> | <b>28,472.70</b> | <b>29,392.91</b> | <b>120,742.68</b> |

**STATE: WY - WYOMING**

| REGISTRANT ZIP CODE 3       | 1ST QUARTER     | 2ND QUARTER     | 3RD QUARTER     | 4TH QUARTER     | TOTAL GRAMS      |
|-----------------------------|-----------------|-----------------|-----------------|-----------------|------------------|
| 820                         | 2,211.89        | 2,198.81        | 1,922.74        | 2,203.58        | 8,537.02         |
| 822                         | 235.33          | 238.52          | 227.51          | 215.92          | 917.28           |
| 823                         | 98.66           | 117.30          | 104.89          | 114.66          | 435.52           |
| 824                         | 681.97          | 725.51          | 683.87          | 743.07          | 2,834.43         |
| 825                         | 551.24          | 398.13          | 357.91          | 452.95          | 1,760.23         |
| 826                         | 1,469.74        | 1,510.41        | 1,337.17        | 1,574.95        | 5,892.28         |
| 827                         | 673.59          | 616.41          | 661.46          | 654.87          | 2,606.32         |
| 828                         | 558.93          | 557.93          | 526.10          | 581.10          | 2,224.06         |
| 829                         | 794.34          | 721.85          | 715.42          | 802.21          | 3,033.82         |
| 830                         | 331.96          | 306.28          | 319.97          | 353.41          | 1,311.61         |
| 831                         | 209.69          | 155.17          | 171.14          | 199.13          | 735.13           |
| <b>WY - WYOMING - Total</b> | <b>7,817.34</b> | <b>7,546.33</b> | <b>7,028.17</b> | <b>7,895.84</b> | <b>30,287.69</b> |

**DRUG: 9050 - CODEINE****STATE: AK - ALASKA**

| REGISTRANT ZIP CODE 3      | 1ST QUARTER     | 2ND QUARTER     | 3RD QUARTER     | 4TH QUARTER     | TOTAL GRAMS      |
|----------------------------|-----------------|-----------------|-----------------|-----------------|------------------|
| 995                        | 2,585.42        | 2,292.93        | 2,508.92        | 2,004.49        | 9,391.76         |
| 996                        | 1,291.52        | 1,354.13        | 1,187.58        | 997.96          | 4,831.19         |
| 997                        | 1,683.63        | 1,758.01        | 1,759.75        | 1,542.77        | 6,744.15         |
| 998                        | 439.06          | 466.31          | 407.71          | 380.68          | 1,693.76         |
| 999                        | 246.61          | 221.19          | 231.13          | 209.96          | 908.88           |
| <b>AK - ALASKA - Total</b> | <b>6,246.24</b> | <b>6,092.57</b> | <b>6,095.09</b> | <b>5,135.85</b> | <b>23,569.75</b> |

**STATE: AL - ALABAMA**

| REGISTRANT ZIP CODE 3 | 1ST QUARTER | 2ND QUARTER | 3RD QUARTER | 4TH QUARTER | TOTAL GRAMS |
|-----------------------|-------------|-------------|-------------|-------------|-------------|
| 350                   | 5,700.69    | 5,826.36    | 5,251.00    | 5,510.60    | 22,288.64   |
| 351                   | 3,695.73    | 3,390.41    | 3,596.83    | 3,326.91    | 14,009.87   |
| 352                   | 5,551.75    | 4,495.23    | 4,742.96    | 4,724.83    | 19,514.76   |
| 354                   | 1,812.85    | 1,886.06    | 1,467.66    | 1,721.44    | 6,888.01    |
| 355                   | 2,012.28    | 2,014.69    | 1,912.28    | 1,796.99    | 7,736.25    |
| 356                   | 6,250.52    | 5,832.80    | 5,719.09    | 5,604.84    | 23,407.25   |
| 357                   | 727.30      | 663.59      | 658.69      | 693.14      | 2,742.72    |
| 358                   | 1,203.94    | 739.39      | 1,041.80    | 709.38      | 3,694.51    |
| 359                   | 2,255.81    | 1,753.27    | 1,947.62    | 1,982.42    | 7,939.13    |
| 360                   | 3,465.87    | 3,326.16    | 3,707.81    | 3,594.73    | 14,094.56   |
| 361                   | 2,748.70    | 2,323.68    | 2,053.34    | 2,067.73    | 9,193.45    |
| 362                   | 1,416.24    | 997.90      | 998.25      | 1,202.29    | 4,614.68    |
| 363                   | 1,839.25    | 1,559.77    | 1,676.91    | 1,634.86    | 6,710.78    |
| 364                   | 1,811.18    | 1,525.15    | 1,822.86    | 1,642.10    | 6,801.30    |
| 365                   | 4,226.68    | 3,609.28    | 3,682.48    | 3,689.20    | 15,207.64   |
| 366                   | 4,450.56    | 4,148.35    | 3,989.25    | 4,210.79    | 16,798.96   |

|                             |                  |                  |                  |                  |                   |
|-----------------------------|------------------|------------------|------------------|------------------|-------------------|
| 367                         | 2,727.77         | 2,337.18         | 2,434.61         | 2,297.40         | 9,796.96          |
| 368                         | 2,448.06         | 1,947.21         | 2,014.29         | 2,013.35         | 8,422.91          |
| 369                         | 382.35           | 484.01           | 432.07           | 444.23           | 1,742.66          |
| <b>AL - ALABAMA - Total</b> | <b>54,727.52</b> | <b>48,860.49</b> | <b>49,149.79</b> | <b>48,867.23</b> | <b>201,605.04</b> |

**STATE: AR - ARKANSAS**

| REGISTRANT ZIP CODE 3        | 1ST QUARTER      | 2ND QUARTER      | 3RD QUARTER      | 4TH QUARTER      | TOTAL GRAMS       |
|------------------------------|------------------|------------------|------------------|------------------|-------------------|
| 716                          | 3,477.58         | 3,335.02         | 3,427.47         | 3,040.97         | 13,281.04         |
| 717                          | 3,025.98         | 3,236.68         | 3,096.88         | 2,830.38         | 12,189.93         |
| 718                          | 5,421.05         | 5,430.78         | 5,266.63         | 4,826.94         | 20,945.41         |
| 719                          | 4,832.49         | 3,997.88         | 4,383.36         | 4,175.61         | 17,389.33         |
| 720                          | 6,102.15         | 5,518.85         | 5,018.02         | 4,618.84         | 21,257.86         |
| 721                          | 6,583.06         | 6,114.23         | 5,963.15         | 5,092.14         | 23,752.58         |
| 722                          | 3,063.80         | 2,804.81         | 2,551.81         | 2,346.92         | 10,767.34         |
| 723                          | 7,524.30         | 6,244.64         | 5,916.44         | 5,632.25         | 25,317.62         |
| 724                          | 8,642.39         | 7,366.71         | 7,480.98         | 6,882.04         | 30,372.12         |
| 725                          | 5,026.29         | 4,570.29         | 3,769.13         | 3,934.15         | 17,299.86         |
| 726                          | 1,924.05         | 2,075.99         | 2,219.10         | 2,059.06         | 8,278.19          |
| 727                          | 4,352.27         | 3,443.47         | 3,580.65         | 3,210.08         | 14,586.48         |
| 728                          | 2,808.37         | 2,615.84         | 2,546.04         | 2,126.30         | 10,096.54         |
| 729                          | 5,103.49         | 4,029.83         | 3,763.24         | 3,316.96         | 16,213.52         |
| <b>AR - ARKANSAS - Total</b> | <b>67,887.27</b> | <b>60,785.00</b> | <b>58,982.89</b> | <b>54,092.64</b> | <b>241,747.80</b> |

**STATE: AS - AMERICAN SAMOA**

| REGISTRANT ZIP CODE 3              | 1ST QUARTER   | 2ND QUARTER   | 3RD QUARTER   | 4TH QUARTER   | TOTAL GRAMS     |
|------------------------------------|---------------|---------------|---------------|---------------|-----------------|
| 967                                | 190.07        | 353.62        | 181.23        | 335.94        | 1,060.85        |
| <b>AS - AMERICAN SAMOA - Total</b> | <b>190.07</b> | <b>353.62</b> | <b>181.23</b> | <b>335.94</b> | <b>1,060.85</b> |

**STATE: AZ - ARIZONA**

| REGISTRANT ZIP CODE 3       | 1ST QUARTER      | 2ND QUARTER      | 3RD QUARTER      | 4TH QUARTER      | TOTAL GRAMS       |
|-----------------------------|------------------|------------------|------------------|------------------|-------------------|
| 850                         | 15,027.17        | 13,181.40        | 14,592.50        | 13,455.85        | 56,256.92         |
| 851                         | 3,232.52         | 2,261.54         | 2,179.95         | 2,217.55         | 9,891.56          |
| 852                         | 20,137.67        | 16,989.11        | 16,143.69        | 15,622.58        | 68,893.05         |
| 853                         | 9,861.14         | 8,207.01         | 7,895.83         | 7,458.12         | 33,422.10         |
| 855                         | 843.88           | 705.39           | 873.12           | 845.35           | 3,267.74          |
| 856                         | 2,209.27         | 2,113.41         | 2,227.38         | 1,795.23         | 8,345.30          |
| 857                         | 8,966.82         | 7,383.00         | 7,438.13         | 6,966.75         | 30,754.70         |
| 859                         | 571.26           | 455.05           | 683.44           | 663.65           | 2,373.41          |
| 860                         | 938.74           | 792.04           | 711.87           | 891.33           | 3,333.99          |
| 863                         | 1,997.68         | 1,787.23         | 1,955.11         | 1,793.10         | 7,533.12          |
| 864                         | 2,265.87         | 2,479.06         | 2,140.22         | 2,410.71         | 9,295.86          |
| 865                         | 1,198.58         | 1,031.55         | 825.82           | 858.79           | 3,914.74          |
| <b>AZ - ARIZONA - Total</b> | <b>67,250.60</b> | <b>57,385.77</b> | <b>57,667.06</b> | <b>54,979.04</b> | <b>237,282.47</b> |

## STATE: CA - CALIFORNIA

| REGISTRANT ZIP CODE 3 | 1ST QUARTER | 2ND QUARTER | 3RD QUARTER | 4TH QUARTER | TOTAL GRAMS |
|-----------------------|-------------|-------------|-------------|-------------|-------------|
| 900                   | 25,090.51   | 24,081.59   | 23,062.21   | 21,104.13   | 93,338.45   |
| 902                   | 22,476.14   | 21,331.42   | 21,442.64   | 20,253.01   | 85,503.21   |
| 903                   | 2,644.61    | 2,963.74    | 2,890.81    | 2,731.68    | 11,230.84   |
| 904                   | 1,051.15    | 1,114.61    | 1,019.75    | 1,068.01    | 4,253.53    |
| 905                   | 2,189.59    | 1,863.35    | 1,846.44    | 1,796.16    | 7,695.54    |
| 906                   | 6,766.50    | 6,280.30    | 6,126.49    | 5,835.17    | 25,008.46   |
| 907                   | 8,637.61    | 8,633.09    | 8,085.85    | 7,196.74    | 32,553.29   |
| 908                   | 6,499.15    | 6,537.96    | 6,187.35    | 5,594.93    | 24,819.38   |
| 910                   | 2,731.77    | 2,871.53    | 2,811.65    | 2,632.70    | 11,047.65   |
| 911                   | 2,092.52    | 2,113.68    | 2,106.49    | 1,746.54    | 8,059.22    |
| 912                   | 2,986.27    | 2,657.75    | 2,827.30    | 2,313.05    | 10,784.38   |
| 913                   | 12,708.79   | 12,834.50   | 12,555.66   | 11,038.10   | 49,137.04   |
| 914                   | 4,766.04    | 4,482.47    | 4,135.32    | 3,702.56    | 17,086.39   |
| 915                   | 1,220.75    | 1,426.54    | 1,441.18    | 1,294.01    | 5,382.49    |
| 916                   | 1,245.50    | 1,200.59    | 1,249.88    | 1,217.21    | 4,913.17    |
| 917                   | 20,716.23   | 20,128.68   | 19,593.71   | 18,339.33   | 78,777.95   |
| 918                   | 871.49      | 835.64      | 693.59      | 718.65      | 3,119.37    |
| 919                   | 4,225.10    | 3,615.55    | 3,504.41    | 3,164.42    | 14,509.48   |
| 920                   | 19,828.71   | 14,453.49   | 15,061.02   | 14,598.28   | 63,941.50   |
| 921                   | 10,512.77   | 10,122.01   | 9,897.64    | 8,829.65    | 39,362.07   |
| 922                   | 10,002.73   | 8,784.95    | 8,556.14    | 8,722.73    | 36,066.55   |
| 923                   | 17,930.75   | 16,566.55   | 16,897.65   | 15,157.73   | 66,552.68   |
| 924                   | 2,981.19    | 2,768.15    | 2,686.38    | 2,483.05    | 10,918.76   |
| 925                   | 17,602.26   | 16,175.45   | 16,075.56   | 14,977.88   | 64,831.14   |
| 926                   | 10,828.65   | 10,753.08   | 10,827.43   | 10,029.70   | 42,438.86   |
| 927                   | 3,365.46    | 3,398.20    | 3,275.82    | 3,145.89    | 13,185.37   |
| 928                   | 11,972.05   | 11,267.61   | 11,220.46   | 10,687.97   | 45,148.08   |
| 930                   | 6,951.94    | 6,153.10    | 6,004.67    | 6,071.48    | 25,181.18   |
| 931                   | 1,561.12    | 1,608.31    | 1,465.91    | 1,322.59    | 5,957.92    |
| 932                   | 9,743.73    | 9,006.04    | 8,983.34    | 8,672.87    | 36,405.98   |
| 933                   | 7,211.61    | 6,539.75    | 6,588.17    | 6,322.40    | 26,661.93   |
| 934                   | 5,451.45    | 5,360.18    | 5,095.43    | 5,144.96    | 21,052.02   |
| 935                   | 9,704.12    | 9,070.42    | 9,368.63    | 8,292.96    | 36,436.13   |
| 936                   | 7,374.04    | 7,154.16    | 6,997.71    | 6,894.58    | 28,420.49   |
| 937                   | 9,678.04    | 9,157.62    | 9,536.31    | 8,514.13    | 36,886.10   |
| 939                   | 3,388.66    | 3,805.10    | 3,192.76    | 2,971.51    | 13,358.03   |
| 940                   | 6,170.80    | 5,615.97    | 5,368.39    | 4,828.27    | 21,983.43   |
| 941                   | 8,135.91    | 7,542.99    | 7,542.08    | 7,225.16    | 30,446.14   |

|                                |                   |                   |                   |                   |                     |
|--------------------------------|-------------------|-------------------|-------------------|-------------------|---------------------|
| 943                            | 578.69            | 603.41            | 573.41            | 612.89            | 2,368.40            |
| 944                            | 855.71            | 1,062.36          | 971.99            | 868.04            | 3,758.09            |
| 945                            | 28,287.15         | 26,161.83         | 25,770.19         | 24,313.79         | 104,532.96          |
| 946                            | 3,925.00          | 3,526.09          | 3,704.69          | 3,405.77          | 14,561.56           |
| 947                            | 926.27            | 934.82            | 925.64            | 830.13            | 3,616.87            |
| 948                            | 1,395.58          | 1,402.44          | 1,227.96          | 1,060.84          | 5,086.82            |
| 949                            | 3,570.87          | 3,248.59          | 3,326.61          | 3,046.45          | 13,192.51           |
| 950                            | 5,864.07          | 5,346.86          | 5,217.06          | 5,330.74          | 21,758.73           |
| 951                            | 6,436.80          | 5,720.15          | 5,644.61          | 5,023.88          | 22,825.45           |
| 952                            | 10,633.09         | 9,379.97          | 9,415.83          | 8,558.65          | 37,987.53           |
| 953                            | 15,895.69         | 14,999.74         | 15,648.59         | 14,290.53         | 60,834.55           |
| 954                            | 5,097.24          | 4,436.34          | 4,886.85          | 4,522.28          | 18,942.72           |
| 955                            | 2,948.57          | 2,892.18          | 2,756.40          | 2,556.04          | 11,153.19           |
| 956                            | 13,995.25         | 13,125.89         | 12,988.59         | 11,959.15         | 52,068.88           |
| 957                            | 2,230.55          | 2,256.14          | 2,249.95          | 1,976.00          | 8,712.63            |
| 958                            | 7,315.15          | 6,938.19          | 7,083.41          | 5,850.99          | 27,187.74           |
| 959                            | 7,131.71          | 7,193.71          | 6,635.71          | 5,880.55          | 26,841.68           |
| 960                            | 3,282.59          | 3,156.52          | 3,206.75          | 3,221.57          | 12,867.43           |
| 961                            | 1,197.58          | 1,061.95          | 1,134.89          | 1,011.12          | 4,405.54            |
| <b>CA - CALIFORNIA - Total</b> | <b>430,883.25</b> | <b>403,723.32</b> | <b>399,591.36</b> | <b>370,959.56</b> | <b>1,605,157.49</b> |

**STATE: CO - COLORADO**

| REGISTRANT ZIP CODE 3        | 1ST QUARTER      | 2ND QUARTER      | 3RD QUARTER      | 4TH QUARTER      | TOTAL GRAMS      |
|------------------------------|------------------|------------------|------------------|------------------|------------------|
| 800                          | 4,357.99         | 3,904.50         | 3,692.57         | 3,141.72         | 15,096.78        |
| 801                          | 2,566.36         | 2,475.59         | 2,292.20         | 2,167.25         | 9,501.40         |
| 802                          | 4,627.66         | 3,960.40         | 3,513.09         | 3,114.17         | 15,215.31        |
| 803                          | 471.40           | 405.88           | 294.82           | 396.67           | 1,568.77         |
| 804                          | 553.13           | 471.63           | 465.54           | 410.17           | 1,900.46         |
| 805                          | 2,089.65         | 2,010.84         | 2,055.70         | 1,539.60         | 7,695.79         |
| 806                          | 957.76           | 815.30           | 730.48           | 692.55           | 3,196.09         |
| 807                          | 391.37           | 295.41           | 325.43           | 387.00           | 1,399.22         |
| 808                          | 633.06           | 621.91           | 727.18           | 562.82           | 2,544.98         |
| 809                          | 2,485.93         | 2,238.47         | 2,216.90         | 1,905.57         | 8,846.87         |
| 810                          | 2,131.19         | 1,475.02         | 1,364.17         | 1,570.68         | 6,541.06         |
| 811                          | 433.45           | 344.96           | 412.55           | 295.41           | 1,486.37         |
| 812                          | 828.09           | 600.16           | 568.49           | 470.70           | 2,467.44         |
| 813                          | 237.68           | 170.18           | 246.79           | 127.08           | 781.73           |
| 814                          | 516.15           | 414.15           | 469.82           | 300.11           | 1,700.22         |
| 815                          | 841.79           | 823.97           | 962.16           | 604.63           | 3,232.55         |
| 816                          | 481.03           | 392.25           | 426.45           | 257.30           | 1,557.03         |
| <b>CO - COLORADO - Total</b> | <b>24,603.70</b> | <b>21,420.62</b> | <b>20,764.32</b> | <b>17,943.44</b> | <b>84,732.08</b> |

**STATE: CT - CONNECTICUT**

| REGISTRANT ZIP CODE 3           | 1ST QUARTER      | 2ND QUARTER      | 3RD QUARTER      | 4TH QUARTER      | TOTAL GRAMS      |
|---------------------------------|------------------|------------------|------------------|------------------|------------------|
| 060                             | 4,059.07         | 4,188.15         | 3,878.55         | 3,597.63         | 15,723.39        |
| 061                             | 1,230.94         | 1,242.44         | 1,284.10         | 1,255.75         | 5,013.24         |
| 062                             | 690.00           | 661.54           | 625.26           | 597.82           | 2,574.62         |
| 063                             | 1,599.79         | 1,389.37         | 1,684.77         | 1,350.22         | 6,024.16         |
| 064                             | 4,428.58         | 4,820.02         | 3,869.33         | 4,755.31         | 17,873.24        |
| 065                             | 1,320.46         | 1,391.99         | 1,421.41         | 1,209.63         | 5,343.48         |
| 066                             | 1,327.25         | 1,292.92         | 1,212.78         | 1,269.59         | 5,102.55         |
| 067                             | 2,419.51         | 2,303.59         | 2,300.62         | 2,035.09         | 9,058.82         |
| 068                             | 2,708.00         | 2,506.92         | 2,260.35         | 2,168.28         | 9,643.55         |
| 069                             | 569.32           | 586.96           | 485.94           | 480.96           | 2,123.18         |
| <b>CT - CONNECTICUT - Total</b> | <b>20,352.91</b> | <b>20,383.90</b> | <b>19,023.12</b> | <b>18,720.29</b> | <b>78,480.23</b> |

**STATE: DC - DISTRICT OF COLUMBIA**

| REGISTRANT ZIP CODE 3              | 1ST QUARTER      | 2ND QUARTER      | 3RD QUARTER      | 4TH QUARTER     | TOTAL GRAMS      |
|------------------------------------|------------------|------------------|------------------|-----------------|------------------|
| 200                                | 10,707.20        | 10,373.64        | 10,640.26        | 8,761.79        | 40,482.89        |
| 203                                | 16.20            | 17.68            | 0                | 0               | 33.88            |
| 204                                | 332.24           | 166.30           | 197.25           | 242.73          | 938.53           |
| 205                                | 0                | 0                | 0                | 6.63            | 6.63             |
| <b>DC - DISTRICT OF COLUMBIA -</b> | <b>11,055.64</b> | <b>10,557.62</b> | <b>10,837.50</b> | <b>9,011.16</b> | <b>41,461.92</b> |

**STATE: DE - DELAWARE**

| REGISTRANT ZIP CODE 3        | 1ST QUARTER     | 2ND QUARTER     | 3RD QUARTER     | 4TH QUARTER     | TOTAL GRAMS      |
|------------------------------|-----------------|-----------------|-----------------|-----------------|------------------|
| 197                          | 3,230.74        | 3,328.06        | 2,750.04        | 3,037.03        | 12,345.87        |
| 198                          | 2,042.51        | 1,780.24        | 2,055.90        | 1,833.72        | 7,712.38         |
| 199                          | 3,143.81        | 3,062.59        | 2,832.91        | 2,851.54        | 11,890.85        |
| <b>DE - DELAWARE - Total</b> | <b>8,417.06</b> | <b>8,170.89</b> | <b>7,638.85</b> | <b>7,722.29</b> | <b>31,949.10</b> |

**STATE: FL - FLORIDA**

| REGISTRANT ZIP CODE 3 | 1ST QUARTER | 2ND QUARTER | 3RD QUARTER | 4TH QUARTER | TOTAL GRAMS |
|-----------------------|-------------|-------------|-------------|-------------|-------------|
| 320                   | 5,312.53    | 4,389.92    | 4,833.35    | 4,738.60    | 19,274.39   |
| 321                   | 5,942.87    | 5,313.54    | 4,831.68    | 4,967.47    | 21,055.56   |
| 322                   | 6,618.68    | 6,375.43    | 6,112.75    | 5,307.84    | 24,414.71   |
| 323                   | 3,690.41    | 3,340.58    | 4,220.32    | 3,132.17    | 14,383.47   |
| 324                   | 3,337.33    | 3,145.68    | 4,855.98    | 4,438.26    | 15,777.25   |
| 325                   | 3,965.33    | 3,307.71    | 3,699.53    | 3,184.44    | 14,157.01   |
| 326                   | 2,417.77    | 2,136.02    | 2,124.77    | 2,295.35    | 8,973.92    |
| 327                   | 7,601.92    | 6,452.72    | 6,178.22    | 6,051.37    | 26,284.24   |
| 328                   | 6,256.30    | 5,102.93    | 4,448.94    | 4,086.69    | 19,894.86   |
| 329                   | 5,088.44    | 4,763.52    | 4,268.33    | 4,219.38    | 18,339.67   |
| 330                   | 13,677.99   | 12,127.16   | 10,347.48   | 9,270.95    | 45,423.57   |
| 331                   | 15,436.37   | 15,200.31   | 12,136.06   | 10,909.04   | 53,681.79   |

|                             |                   |                   |                   |                   |                   |
|-----------------------------|-------------------|-------------------|-------------------|-------------------|-------------------|
| 333                         | 7,278.16          | 6,349.42          | 5,401.55          | 5,028.76          | 24,057.88         |
| 334                         | 12,547.28         | 10,946.38         | 9,173.88          | 9,570.54          | 42,238.07         |
| 335                         | 8,299.89          | 7,304.70          | 6,543.98          | 6,711.56          | 28,860.12         |
| 336                         | 8,104.50          | 7,883.25          | 7,182.87          | 7,567.99          | 30,738.61         |
| 337                         | 8,975.74          | 8,040.53          | 7,670.80          | 7,468.95          | 32,156.02         |
| 338                         | 8,236.50          | 7,076.26          | 6,616.49          | 7,263.00          | 29,192.26         |
| 339                         | 8,387.34          | 7,135.52          | 5,851.87          | 6,421.42          | 27,796.16         |
| 341                         | 2,805.63          | 1,760.50          | 1,479.01          | 1,764.83          | 7,809.97          |
| 342                         | 6,253.72          | 5,337.87          | 3,754.79          | 4,246.50          | 19,592.88         |
| 344                         | 5,491.46          | 5,152.99          | 5,718.12          | 5,253.21          | 21,615.79         |
| 346                         | 6,904.53          | 6,332.38          | 6,616.15          | 6,518.65          | 26,371.71         |
| 347                         | 5,012.28          | 4,297.71          | 3,847.58          | 3,632.24          | 16,789.81         |
| 349                         | 3,205.19          | 3,038.40          | 2,738.61          | 2,635.55          | 11,617.74         |
| <b>FL - FLORIDA - Total</b> | <b>170,848.17</b> | <b>152,311.43</b> | <b>140,653.09</b> | <b>136,684.76</b> | <b>600,497.44</b> |

**STATE: GA - GEORGIA**

| REGISTRANT ZIP CODE 3       | 1ST QUARTER       | 2ND QUARTER      | 3RD QUARTER      | 4TH QUARTER      | TOTAL GRAMS       |
|-----------------------------|-------------------|------------------|------------------|------------------|-------------------|
| 300                         | 15,265.91         | 14,044.13        | 12,446.06        | 11,677.24        | 53,433.34         |
| 301                         | 9,817.43          | 8,765.96         | 8,191.38         | 7,449.08         | 34,223.84         |
| 302                         | 11,966.18         | 11,026.16        | 10,139.41        | 8,964.00         | 42,095.75         |
| 303                         | 7,478.32          | 6,546.02         | 6,333.99         | 5,561.67         | 25,920.01         |
| 304                         | 3,240.94          | 3,161.10         | 2,917.90         | 2,983.00         | 12,302.94         |
| 305                         | 7,102.10          | 5,853.06         | 6,218.47         | 5,490.90         | 24,664.52         |
| 306                         | 6,235.91          | 5,579.31         | 5,587.31         | 5,394.03         | 22,796.57         |
| 307                         | 3,268.74          | 2,472.71         | 2,556.53         | 2,559.48         | 10,857.46         |
| 308                         | 2,467.66          | 2,246.55         | 2,339.85         | 2,320.32         | 9,374.37          |
| 309                         | 3,392.21          | 3,342.77         | 3,358.81         | 2,971.69         | 13,065.48         |
| 310                         | 6,421.65          | 5,491.94         | 5,347.04         | 5,232.92         | 22,493.55         |
| 312                         | 1,833.28          | 1,701.63         | 1,684.36         | 1,849.85         | 7,069.12          |
| 313                         | 1,779.03          | 1,511.48         | 1,370.26         | 1,443.20         | 6,103.97          |
| 314                         | 1,773.82          | 1,363.27         | 1,243.90         | 1,266.17         | 5,647.16          |
| 315                         | 6,285.97          | 5,512.26         | 5,614.56         | 5,352.87         | 22,765.67         |
| 316                         | 2,493.71          | 2,488.83         | 2,445.10         | 2,059.36         | 9,487.00          |
| 317                         | 6,509.94          | 5,682.63         | 5,515.16         | 5,321.03         | 23,028.76         |
| 318                         | 434.20            | 423.33           | 545.24           | 455.28           | 1,858.05          |
| 319                         | 2,900.10          | 2,588.79         | 2,631.51         | 2,347.23         | 10,467.62         |
| 398                         | 2,214.52          | 2,207.89         | 1,898.48         | 1,952.62         | 8,273.51          |
| <b>GA - GEORGIA - Total</b> | <b>102,881.63</b> | <b>92,009.82</b> | <b>88,385.31</b> | <b>82,651.93</b> | <b>365,928.70</b> |

**STATE: GU - GUAM**

| REGISTRANT ZIP CODE 3 | 1ST QUARTER | 2ND QUARTER | 3RD QUARTER | 4TH QUARTER | TOTAL GRAMS |
|-----------------------|-------------|-------------|-------------|-------------|-------------|
| 969                   | 930.91      | 1,022.54    | 961.07      | 684.38      | 3,598.89    |

|                          |               |                 |               |               |                 |
|--------------------------|---------------|-----------------|---------------|---------------|-----------------|
| <b>GU - GUAM - Total</b> | <b>930.91</b> | <b>1,022.54</b> | <b>961.07</b> | <b>684.38</b> | <b>3,598.89</b> |
|--------------------------|---------------|-----------------|---------------|---------------|-----------------|

**STATE: HI - HAWAII**

| REGISTRANT ZIP CODE 3      | 1ST QUARTER      | 2ND QUARTER      | 3RD QUARTER      | 4TH QUARTER      | TOTAL GRAMS      |
|----------------------------|------------------|------------------|------------------|------------------|------------------|
| 967                        | 8,237.04         | 7,936.98         | 7,750.44         | 7,111.15         | 31,035.61        |
| 968                        | 4,085.02         | 4,070.07         | 3,754.56         | 3,479.79         | 15,389.45        |
| <b>HI - HAWAII - Total</b> | <b>12,322.06</b> | <b>12,007.05</b> | <b>11,505.00</b> | <b>10,590.95</b> | <b>46,425.06</b> |

**STATE: IA - IOWA**

| REGISTRANT ZIP CODE 3    | 1ST QUARTER      | 2ND QUARTER      | 3RD QUARTER      | 4TH QUARTER      | TOTAL GRAMS      |
|--------------------------|------------------|------------------|------------------|------------------|------------------|
| 500                      | 1,155.74         | 969.87           | 1,285.41         | 1,042.05         | 4,453.07         |
| 501                      | 1,015.10         | 887.68           | 1,322.04         | 847.65           | 4,072.48         |
| 502                      | 899.96           | 888.35           | 963.36           | 840.50           | 3,592.16         |
| 503                      | 1,913.10         | 1,775.97         | 1,929.89         | 1,464.18         | 7,083.13         |
| 504                      | 472.40           | 412.18           | 313.83           | 364.67           | 1,563.09         |
| 505                      | 767.08           | 503.99           | 759.48           | 645.90           | 2,676.45         |
| 506                      | 805.39           | 726.47           | 960.29           | 765.21           | 3,257.36         |
| 507                      | 527.82           | 464.49           | 604.27           | 416.79           | 2,013.36         |
| 508                      | 209.96           | 145.87           | 201.48           | 214.38           | 771.69           |
| 510                      | 473.91           | 437.03           | 445.87           | 372.94           | 1,729.74         |
| 511                      | 708.87           | 608.69           | 565.59           | 631.99           | 2,515.14         |
| 512                      | 118.24           | 129.29           | 121.56           | 54.15            | 423.23           |
| 513                      | 362.64           | 290.25           | 398.88           | 332.59           | 1,384.36         |
| 514                      | 332.79           | 243.09           | 211.25           | 294.48           | 1,081.60         |
| 515                      | 818.46           | 808.42           | 802.34           | 723.60           | 3,152.82         |
| 516                      | 232.78           | 193.85           | 337.07           | 240.88           | 1,004.57         |
| 520                      | 1,201.64         | 959.33           | 955.19           | 948.28           | 4,064.45         |
| 521                      | 300.76           | 280.68           | 184.50           | 233.17           | 999.11           |
| 522                      | 1,101.00         | 1,073.03         | 1,086.58         | 841.18           | 4,101.79         |
| 523                      | 675.07           | 519.09           | 567.85           | 554.07           | 2,316.08         |
| 524                      | 718.83           | 678.12           | 834.12           | 687.89           | 2,918.96         |
| 525                      | 925.37           | 861.37           | 1,225.68         | 777.19           | 3,789.61         |
| 526                      | 785.02           | 792.57           | 895.24           | 692.42           | 3,165.24         |
| 527                      | 1,371.81         | 1,119.04         | 1,563.82         | 1,201.72         | 5,256.39         |
| 528                      | 885.16           | 856.20           | 836.41           | 877.76           | 3,455.53         |
| <b>IA - IOWA - Total</b> | <b>18,778.90</b> | <b>16,624.91</b> | <b>19,371.99</b> | <b>16,065.61</b> | <b>70,841.41</b> |

**STATE: ID - IDAHO**

| REGISTRANT ZIP CODE 3 | 1ST QUARTER | 2ND QUARTER | 3RD QUARTER | 4TH QUARTER | TOTAL GRAMS |
|-----------------------|-------------|-------------|-------------|-------------|-------------|
| 832                   | 1,482.50    | 1,449.27    | 1,476.30    | 1,342.99    | 5,751.05    |
| 833                   | 1,258.96    | 1,020.69    | 1,258.60    | 1,115.53    | 4,653.78    |
| 834                   | 1,531.77    | 1,347.49    | 1,433.95    | 1,220.13    | 5,533.34    |
| 835                   | 1,041.30    | 1,001.78    | 956.36      | 1,083.09    | 4,082.53    |



|                           |                  |                  |                  |                  |                  |
|---------------------------|------------------|------------------|------------------|------------------|------------------|
| 836                       | 3,521.33         | 2,468.87         | 3,469.78         | 3,678.23         | 13,138.21        |
| 837                       | 1,705.81         | 1,633.88         | 1,614.84         | 1,598.70         | 6,553.23         |
| 838                       | 2,561.82         | 2,066.19         | 2,196.46         | 2,157.24         | 8,981.71         |
| <b>ID - IDAHO - Total</b> | <b>13,103.49</b> | <b>10,988.15</b> | <b>12,406.29</b> | <b>12,195.92</b> | <b>48,693.85</b> |

**STATE: IL - ILLINOIS**

| REGISTRANT ZIP CODE 3        | 1ST QUARTER       | 2ND QUARTER       | 3RD QUARTER       | 4TH QUARTER       | TOTAL GRAMS       |
|------------------------------|-------------------|-------------------|-------------------|-------------------|-------------------|
| 600                          | 19,173.27         | 19,474.48         | 18,769.93         | 17,874.12         | 75,291.80         |
| 601                          | 13,642.64         | 13,170.11         | 13,156.14         | 13,510.85         | 53,479.73         |
| 602                          | 420.01            | 521.77            | 477.75            | 453.33            | 1,872.85          |
| 603                          | 1,115.62          | 958.81            | 917.07            | 1,125.67          | 4,117.17          |
| 604                          | 18,317.26         | 17,481.77         | 17,272.16         | 16,318.04         | 69,389.24         |
| 605                          | 9,185.07          | 9,044.07          | 8,963.42          | 8,936.80          | 36,129.36         |
| 606                          | 28,035.13         | 27,350.90         | 26,889.75         | 25,111.88         | 107,387.66        |
| 607                          | 1,527.52          | 1,321.24          | 1,410.01          | 1,480.81          | 5,739.58          |
| 608                          | 1,967.79          | 1,844.33          | 1,541.91          | 1,701.96          | 7,055.98          |
| 609                          | 2,073.00          | 1,998.81          | 1,925.58          | 1,798.15          | 7,795.55          |
| 610                          | 3,107.80          | 2,846.97          | 3,008.31          | 3,069.63          | 12,032.72         |
| 611                          | 4,139.27          | 3,915.89          | 4,092.67          | 3,819.05          | 15,966.87         |
| 612                          | 1,673.92          | 1,732.51          | 1,799.35          | 1,765.56          | 6,971.34          |
| 613                          | 1,668.99          | 1,505.34          | 1,554.43          | 1,713.18          | 6,441.94          |
| 614                          | 1,889.89          | 1,611.24          | 1,978.04          | 1,608.28          | 7,087.45          |
| 615                          | 2,128.86          | 2,068.64          | 2,202.53          | 2,044.51          | 8,444.55          |
| 616                          | 2,818.44          | 2,611.92          | 2,760.59          | 2,295.24          | 10,486.20         |
| 617                          | 3,228.19          | 2,830.80          | 2,894.37          | 2,850.65          | 11,804.02         |
| 618                          | 3,721.20          | 3,395.51          | 3,745.42          | 3,502.61          | 14,364.74         |
| 619                          | 1,345.02          | 1,115.35          | 1,121.78          | 1,201.54          | 4,783.69          |
| 620                          | 4,346.97          | 4,269.62          | 5,080.62          | 4,399.00          | 18,096.20         |
| 622                          | 5,621.59          | 5,759.77          | 5,815.55          | 5,436.66          | 22,633.57         |
| 623                          | 1,390.59          | 1,233.03          | 1,349.49          | 1,304.58          | 5,277.69          |
| 624                          | 1,410.04          | 1,086.36          | 1,341.89          | 1,239.13          | 5,077.42          |
| 625                          | 2,321.45          | 2,281.55          | 2,312.56          | 2,223.60          | 9,139.16          |
| 626                          | 1,687.71          | 1,756.93          | 2,009.06          | 1,906.50          | 7,360.20          |
| 627                          | 2,863.83          | 2,632.97          | 2,854.36          | 2,836.58          | 11,187.74         |
| 628                          | 2,459.82          | 2,047.27          | 1,994.95          | 2,204.93          | 8,706.97          |
| 629                          | 4,113.00          | 3,523.21          | 4,004.57          | 3,593.32          | 15,234.11         |
| <b>IL - ILLINOIS - Total</b> | <b>147,393.89</b> | <b>141,391.15</b> | <b>143,244.27</b> | <b>137,326.15</b> | <b>569,355.47</b> |

**STATE: IN - INDIANA**

| REGISTRANT ZIP CODE 3 | 1ST QUARTER | 2ND QUARTER | 3RD QUARTER | 4TH QUARTER | TOTAL GRAMS |
|-----------------------|-------------|-------------|-------------|-------------|-------------|
| 460                   | 2,396.41    | 2,418.18    | 2,295.25    | 1,836.31    | 8,946.15    |
| 461                   | 3,309.67    | 3,094.84    | 3,239.32    | 2,945.08    | 12,588.91   |

|                             |                  |                  |                  |                  |                   |
|-----------------------------|------------------|------------------|------------------|------------------|-------------------|
| 462                         | 6,300.29         | 5,974.32         | 5,216.95         | 5,401.69         | <b>22,893.25</b>  |
| 463                         | 7,837.31         | 8,375.11         | 8,129.61         | 7,907.48         | <b>32,249.50</b>  |
| 464                         | 2,028.07         | 1,840.01         | 2,003.46         | 1,695.15         | <b>7,566.68</b>   |
| 465                         | 2,495.90         | 2,333.91         | 2,237.73         | 2,053.92         | <b>9,121.47</b>   |
| 466                         | 1,072.18         | 889.34           | 909.85           | 923.07           | <b>3,794.44</b>   |
| 467                         | 1,486.69         | 1,473.17         | 1,607.58         | 1,375.63         | <b>5,943.07</b>   |
| 468                         | 1,911.43         | 1,891.59         | 1,706.70         | 1,520.68         | <b>7,030.40</b>   |
| 469                         | 1,886.21         | 1,670.65         | 1,723.65         | 1,541.98         | <b>6,822.49</b>   |
| 470                         | 559.60           | 674.16           | 630.77           | 593.02           | <b>2,457.55</b>   |
| 471                         | 4,963.80         | 3,342.48         | 1,652.86         | 3,900.24         | <b>13,859.38</b>  |
| 472                         | 1,180.70         | 991.52           | 1,047.08         | 1,110.41         | <b>4,329.71</b>   |
| 473                         | 1,765.51         | 1,487.49         | 1,558.97         | 1,224.67         | <b>6,036.64</b>   |
| 474                         | 1,473.65         | 1,175.41         | 1,376.04         | 995.79           | <b>5,020.88</b>   |
| 475                         | 1,141.46         | 803.53           | 823.91           | 678.72           | <b>3,447.62</b>   |
| 476                         | 895.40           | 805.04           | 663.19           | 811.47           | <b>3,175.10</b>   |
| 477                         | 1,783.11         | 1,522.01         | 1,354.58         | 1,354.87         | <b>6,014.57</b>   |
| 478                         | 2,039.72         | 1,729.94         | 1,610.02         | 1,518.33         | <b>6,898.00</b>   |
| 479                         | 1,823.07         | 1,676.86         | 1,555.36         | 1,453.34         | <b>6,508.62</b>   |
| <b>IN - INDIANA - Total</b> | <b>48,350.18</b> | <b>44,169.55</b> | <b>41,342.85</b> | <b>40,841.85</b> | <b>174,704.43</b> |

**STATE: KS - KANSAS**

| REGISTRANT ZIP CODE 3 | 1ST QUARTER | 2ND QUARTER | 3RD QUARTER | 4TH QUARTER | TOTAL GRAMS      |
|-----------------------|-------------|-------------|-------------|-------------|------------------|
| 660                   | 2,961.34    | 2,495.05    | 2,937.60    | 2,305.44    | <b>10,699.43</b> |
| 661                   | 1,045.23    | 883.14      | 932.57      | 858.62      | <b>3,719.57</b>  |
| 662                   | 6,283.83    | 5,188.51    | 7,322.90    | 5,843.32    | <b>24,638.56</b> |
| 664                   | 670.65      | 532.75      | 511.78      | 353.04      | <b>2,068.23</b>  |
| 665                   | 868.00      | 817.15      | 639.57      | 739.60      | <b>3,064.33</b>  |
| 666                   | 1,079.58    | 990.99      | 881.89      | 716.67      | <b>3,669.14</b>  |
| 667                   | 1,365.83    | 1,066.45    | 915.19      | 950.49      | <b>4,297.96</b>  |
| 668                   | 306.66      | 311.13      | 291.97      | 295.53      | <b>1,205.30</b>  |
| 669                   | 309.41      | 267.60      | 252.13      | 202.59      | <b>1,031.74</b>  |
| 670                   | 1,742.35    | 1,733.93    | 1,657.90    | 1,453.05    | <b>6,587.23</b>  |
| 671                   | 1,043.66    | 904.37      | 884.09      | 917.27      | <b>3,749.40</b>  |
| 672                   | 3,426.29    | 3,583.82    | 3,064.08    | 2,722.46    | <b>12,796.66</b> |
| 673                   | 789.55      | 598.56      | 836.52      | 781.82      | <b>3,006.45</b>  |
| 674                   | 1,314.35    | 1,289.56    | 1,077.40    | 1,046.86    | <b>4,728.16</b>  |
| 675                   | 673.79      | 719.93      | 725.12      | 619.56      | <b>2,738.41</b>  |
| 676                   | 386.92      | 282.69      | 246.96      | 283.23      | <b>1,199.80</b>  |
| 677                   | 243.11      | 143.66      | 256.46      | 209.96      | <b>853.19</b>    |
| 678                   | 969.26      | 750.84      | 690.83      | 551.59      | <b>2,962.51</b>  |
| 679                   | 996.85      | 612.20      | 636.51      | 448.65      | <b>2,694.20</b>  |

|                            |                  |                  |                  |                  |                  |
|----------------------------|------------------|------------------|------------------|------------------|------------------|
| <b>KS - KANSAS - Total</b> | <b>26,476.68</b> | <b>23,172.33</b> | <b>24,761.49</b> | <b>21,299.76</b> | <b>95,710.26</b> |
|----------------------------|------------------|------------------|------------------|------------------|------------------|

**STATE: KY - KENTUCKY**

| REGISTRANT ZIP CODE 3        | 1ST QUARTER      | 2ND QUARTER      | 3RD QUARTER      | 4TH QUARTER      | TOTAL GRAMS       |
|------------------------------|------------------|------------------|------------------|------------------|-------------------|
| 400                          | 1,866.41         | 1,833.45         | 1,581.12         | 1,523.65         | 6,804.63          |
| 401                          | 1,112.59         | 1,070.44         | 854.18           | 580.69           | 3,617.90          |
| 402                          | 6,074.67         | 5,437.20         | 5,447.30         | 4,644.64         | 21,603.81         |
| 403                          | 2,473.30         | 2,461.05         | 1,985.95         | 1,693.91         | 8,614.21          |
| 404                          | 1,082.83         | 1,132.34         | 1,019.92         | 949.78           | 4,184.88          |
| 405                          | 1,409.12         | 1,029.11         | 1,099.04         | 1,025.06         | 4,562.33          |
| 406                          | 165.76           | 134.82           | 179.02           | 88.40            | 568.00            |
| 407                          | 1,925.36         | 1,582.43         | 1,604.34         | 1,396.22         | 6,508.36          |
| 408                          | 811.29           | 762.48           | 866.36           | 824.37           | 3,264.50          |
| 409                          | 2,370.33         | 2,004.56         | 1,966.99         | 1,948.20         | 8,290.09          |
| 410                          | 3,752.13         | 3,426.00         | 3,044.92         | 2,909.74         | 13,132.79         |
| 411                          | 1,249.89         | 1,168.72         | 997.38           | 1,177.76         | 4,593.75          |
| 412                          | 1,494.03         | 1,690.73         | 1,723.88         | 1,686.31         | 6,594.94          |
| 413                          | 1,389.05         | 1,276.31         | 1,436.57         | 1,273.80         | 5,375.73          |
| 414                          | 391.47           | 419.92           | 382.35           | 348.38           | 1,542.11          |
| 415                          | 2,361.48         | 2,108.44         | 2,423.37         | 2,404.59         | 9,297.88          |
| 416                          | 1,295.12         | 1,015.32         | 923.82           | 968.02           | 4,202.28          |
| 417                          | 544.74           | 623.61           | 692.46           | 610.87           | 2,471.69          |
| 418                          | 670.84           | 501.69           | 680.71           | 603.36           | 2,456.60          |
| 420                          | 2,075.47         | 1,985.85         | 1,738.32         | 1,698.16         | 7,497.80          |
| 421                          | 2,309.70         | 1,950.75         | 1,982.59         | 2,061.26         | 8,304.30          |
| 422                          | 1,600.09         | 1,322.74         | 1,402.30         | 1,333.80         | 5,658.92          |
| 423                          | 2,081.95         | 1,699.43         | 1,620.32         | 1,577.10         | 6,978.80          |
| 424                          | 1,573.54         | 1,281.35         | 1,276.10         | 1,309.51         | 5,440.50          |
| 425                          | 531.71           | 815.53           | 665.24           | 396.71           | 2,409.19          |
| 426                          | 1,129.91         | 1,096.21         | 983.49           | 1,025.49         | 4,235.10          |
| 427                          | 2,772.03         | 2,518.67         | 2,455.12         | 2,223.26         | 9,969.08          |
| <b>KY - KENTUCKY - Total</b> | <b>46,514.79</b> | <b>42,349.15</b> | <b>41,033.17</b> | <b>38,283.05</b> | <b>168,180.16</b> |

**STATE: LA - LOUISIANA**

| REGISTRANT ZIP CODE 3 | 1ST QUARTER | 2ND QUARTER | 3RD QUARTER | 4TH QUARTER | TOTAL GRAMS |
|-----------------------|-------------|-------------|-------------|-------------|-------------|
| 700                   | 4,685.40    | 4,212.54    | 4,426.94    | 4,225.87    | 17,550.75   |
| 701                   | 2,275.26    | 1,995.24    | 2,260.53    | 1,903.44    | 8,434.47    |
| 703                   | 1,798.96    | 1,806.94    | 1,516.31    | 1,619.33    | 6,741.54    |
| 704                   | 3,232.79    | 3,098.64    | 3,109.90    | 2,727.03    | 12,168.35   |
| 705                   | 8,003.29    | 8,634.84    | 8,831.25    | 8,401.20    | 33,870.57   |
| 706                   | 3,327.80    | 2,965.87    | 2,935.71    | 3,145.56    | 12,374.93   |
| 707                   | 2,070.51    | 1,507.43    | 1,611.45    | 1,709.51    | 6,898.90    |

|                               |                  |                  |                  |                  |                   |
|-------------------------------|------------------|------------------|------------------|------------------|-------------------|
| 708                           | 2,024.69         | 1,751.38         | 1,365.45         | 1,380.69         | 6,522.21          |
| 710                           | 1,283.20         | 1,164.97         | 1,182.27         | 1,245.89         | 4,876.32          |
| 711                           | 2,747.03         | 2,852.30         | 2,466.33         | 2,557.79         | 10,623.45         |
| 712                           | 4,385.33         | 3,571.83         | 3,334.95         | 3,203.81         | 14,495.93         |
| 713                           | 2,940.63         | 2,747.13         | 2,855.41         | 2,825.21         | 11,368.38         |
| 714                           | 1,803.24         | 1,702.26         | 1,843.77         | 1,594.03         | 6,943.30          |
| <b>LA - LOUISIANA - Total</b> | <b>40,578.13</b> | <b>38,011.36</b> | <b>37,740.26</b> | <b>36,539.36</b> | <b>152,869.10</b> |

**STATE: MA - MASSACHUSETTS**

| REGISTRANT ZIP CODE 3             | 1ST QUARTER      | 2ND QUARTER      | 3RD QUARTER      | 4TH QUARTER      | TOTAL GRAMS       |
|-----------------------------------|------------------|------------------|------------------|------------------|-------------------|
| 010                               | 2,658.59         | 2,586.53         | 2,513.43         | 2,513.97         | 10,272.52         |
| 011                               | 1,011.67         | 1,036.72         | 946.87           | 1,009.67         | 4,004.93          |
| 012                               | 475.75           | 507.30           | 480.48           | 537.47           | 2,000.99          |
| 013                               | 425.55           | 521.48           | 418.81           | 402.17           | 1,768.02          |
| 014                               | 1,491.99         | 1,853.11         | 1,494.55         | 1,569.28         | 6,408.92          |
| 015                               | 2,515.82         | 2,890.01         | 2,154.17         | 2,752.57         | 10,312.57         |
| 016                               | 2,007.13         | 1,773.36         | 1,826.76         | 1,790.74         | 7,397.99          |
| 017                               | 2,067.74         | 2,144.00         | 1,931.90         | 2,037.65         | 8,181.29          |
| 018                               | 7,678.26         | 7,476.92         | 6,791.33         | 7,264.20         | 29,210.71         |
| 019                               | 2,822.76         | 2,479.65         | 2,716.42         | 2,689.93         | 10,708.76         |
| 020                               | 2,019.98         | 2,174.08         | 1,998.84         | 2,148.29         | 8,341.19          |
| 021                               | 6,699.87         | 7,100.02         | 5,852.69         | 6,140.70         | 25,793.27         |
| 022                               | 121.06           | 237.43           | 184.22           | 210.85           | 753.56            |
| 023                               | 2,553.67         | 2,576.72         | 2,210.12         | 2,553.65         | 9,894.16          |
| 024                               | 1,290.51         | 1,570.38         | 1,449.45         | 1,437.58         | 5,747.93          |
| 025                               | 824.15           | 678.07           | 654.22           | 790.63           | 2,947.07          |
| 026                               | 847.80           | 1,217.39         | 1,138.14         | 982.98           | 4,186.31          |
| 027                               | 3,667.73         | 3,330.00         | 3,041.19         | 2,999.02         | 13,037.94         |
| <b>MA - MASSACHUSETTS - Total</b> | <b>41,180.01</b> | <b>42,153.20</b> | <b>37,803.57</b> | <b>39,831.35</b> | <b>160,968.12</b> |

**STATE: MD - MARYLAND**

| REGISTRANT ZIP CODE 3 | 1ST QUARTER | 2ND QUARTER | 3RD QUARTER | 4TH QUARTER | TOTAL GRAMS |
|-----------------------|-------------|-------------|-------------|-------------|-------------|
| 206                   | 3,966.48    | 3,651.31    | 3,629.25    | 3,651.17    | 14,898.21   |
| 207                   | 11,954.27   | 13,227.07   | 11,333.66   | 11,209.26   | 47,724.27   |
| 208                   | 5,219.05    | 5,728.47    | 5,492.48    | 4,855.52    | 21,295.52   |
| 209                   | 2,383.98    | 2,059.75    | 1,736.22    | 2,018.70    | 8,198.65    |
| 210                   | 5,397.47    | 5,088.66    | 4,764.92    | 5,054.26    | 20,305.31   |
| 211                   | 2,537.39    | 2,896.26    | 2,640.40    | 2,670.13    | 10,744.18   |
| 212                   | 9,953.23    | 9,276.49    | 8,069.07    | 8,314.21    | 35,613.00   |
| 214                   | 1,095.66    | 1,043.03    | 1,110.89    | 1,027.46    | 4,277.04    |
| 215                   | 999.89      | 754.55      | 770.19      | 731.73      | 3,256.36    |
| 216                   | 1,491.02    | 1,310.99    | 1,244.81    | 1,427.83    | 5,474.66    |

|                              |                  |                  |                  |                  |                   |
|------------------------------|------------------|------------------|------------------|------------------|-------------------|
| 217                          | 4,307.99         | 4,417.91         | 3,637.37         | 3,908.69         | 16,271.96         |
| 218                          | 1,243.55         | 1,307.38         | 1,105.44         | 1,027.03         | 4,683.40          |
| 219                          | 921.21           | 967.53           | 715.29           | 750.11           | 3,354.14          |
| <b>MD - MARYLAND - Total</b> | <b>51,471.18</b> | <b>51,729.40</b> | <b>46,250.02</b> | <b>46,646.09</b> | <b>196,096.69</b> |

**STATE: ME - MAINE**

| REGISTRANT ZIP CODE 3     | 1ST QUARTER     | 2ND QUARTER     | 3RD QUARTER     | 4TH QUARTER     | TOTAL GRAMS      |
|---------------------------|-----------------|-----------------|-----------------|-----------------|------------------|
| 039                       | 40.33           | 117.14          | 80.85           | 112.72          | 351.03           |
| 040                       | 1,988.72        | 1,591.52        | 1,784.57        | 1,726.05        | 7,090.86         |
| 041                       | 536.11          | 393.92          | 467.41          | 410.89          | 1,808.33         |
| 042                       | 1,558.44        | 1,510.84        | 1,471.24        | 1,350.48        | 5,891.01         |
| 043                       | 758.35          | 755.59          | 832.28          | 739.71          | 3,085.93         |
| 044                       | 1,483.20        | 1,142.31        | 1,136.51        | 1,060.93        | 4,822.95         |
| 045                       | 247.15          | 289.15          | 212.90          | 174.02          | 923.22           |
| 046                       | 664.20          | 618.44          | 713.10          | 746.81          | 2,742.54         |
| 047                       | 1,007.22        | 898.84          | 933.00          | 800.23          | 3,639.29         |
| 048                       | 220.64          | 181.89          | 252.39          | 185.03          | 839.96           |
| 049                       | 1,180.99        | 1,022.30        | 1,109.33        | 924.51          | 4,237.13         |
| <b>ME - MAINE - Total</b> | <b>9,685.35</b> | <b>8,521.93</b> | <b>8,993.59</b> | <b>8,231.37</b> | <b>35,432.24</b> |

**STATE: MI - MICHIGAN**

| REGISTRANT ZIP CODE 3 | 1ST QUARTER | 2ND QUARTER | 3RD QUARTER | 4TH QUARTER | TOTAL GRAMS |
|-----------------------|-------------|-------------|-------------|-------------|-------------|
| 480                   | 32,228.80   | 28,308.45   | 25,906.25   | 24,399.53   | 110,843.03  |
| 481                   | 46,594.18   | 43,852.83   | 40,822.80   | 38,201.74   | 169,471.55  |
| 482                   | 43,687.24   | 41,541.22   | 36,993.20   | 33,771.41   | 155,993.07  |
| 483                   | 16,321.85   | 15,473.85   | 12,939.72   | 13,195.76   | 57,931.19   |
| 484                   | 9,206.33    | 7,704.65    | 7,204.84    | 6,871.39    | 30,987.20   |
| 485                   | 8,166.03    | 6,270.13    | 5,710.60    | 6,160.45    | 26,307.21   |
| 486                   | 11,708.03   | 10,424.33   | 10,047.30   | 9,972.30    | 42,151.96   |
| 487                   | 6,230.23    | 5,797.61    | 5,509.48    | 5,374.02    | 22,911.34   |
| 488                   | 9,970.10    | 9,920.23    | 9,062.68    | 8,811.33    | 37,764.34   |
| 489                   | 3,121.35    | 2,938.65    | 2,822.99    | 2,537.43    | 11,420.43   |
| 490                   | 10,730.66   | 9,411.11    | 8,509.48    | 7,913.63    | 36,564.87   |
| 491                   | 856.58      | 714.59      | 681.35      | 801.53      | 3,054.05    |
| 492                   | 5,197.55    | 4,340.39    | 3,753.96    | 3,102.23    | 16,394.13   |
| 493                   | 2,377.33    | 2,279.89    | 1,842.39    | 2,140.11    | 8,639.71    |
| 494                   | 7,790.92    | 6,927.56    | 6,214.21    | 5,773.50    | 26,706.20   |
| 495                   | 4,112.87    | 3,453.50    | 3,433.97    | 3,284.88    | 14,285.23   |
| 496                   | 3,134.55    | 2,856.21    | 2,766.73    | 2,525.37    | 11,282.86   |
| 497                   | 3,860.85    | 3,298.60    | 3,372.64    | 3,089.78    | 13,621.88   |
| 498                   | 2,614.58    | 2,541.02    | 2,091.71    | 2,156.53    | 9,403.83    |
| 499                   | 1,204.84    | 1,070.81    | 875.07      | 1,109.93    | 4,260.65    |

|                              |                   |                   |                   |                   |                   |
|------------------------------|-------------------|-------------------|-------------------|-------------------|-------------------|
| <b>MI - MICHIGAN - Total</b> | <b>229,114.90</b> | <b>209,125.64</b> | <b>190,561.36</b> | <b>181,192.81</b> | <b>809,994.72</b> |
|------------------------------|-------------------|-------------------|-------------------|-------------------|-------------------|

**STATE: MN - MINNESOTA**

| REGISTRANT ZIP CODE 3         | 1ST QUARTER      | 2ND QUARTER      | 3RD QUARTER      | 4TH QUARTER      | TOTAL GRAMS       |
|-------------------------------|------------------|------------------|------------------|------------------|-------------------|
| 550                           | 3,606.91         | 3,410.38         | 3,552.28         | 3,348.26         | 13,917.82         |
| 551                           | 5,819.50         | 5,241.14         | 5,752.15         | 5,113.56         | 21,926.35         |
| 553                           | 5,214.58         | 5,076.47         | 4,602.84         | 5,255.40         | 20,149.29         |
| 554                           | 6,187.19         | 5,824.87         | 5,683.60         | 5,764.57         | 23,460.23         |
| 556                           | 142.49           | 108.74           | 100.52           | 99.07            | 450.82            |
| 557                           | 1,939.75         | 1,671.91         | 1,818.23         | 1,736.89         | 7,166.78          |
| 558                           | 708.65           | 594.70           | 693.11           | 716.68           | 2,713.15          |
| 559                           | 1,292.88         | 1,012.80         | 1,228.09         | 946.82           | 4,480.59          |
| 560                           | 1,583.67         | 1,193.38         | 1,504.22         | 1,261.16         | 5,542.42          |
| 561                           | 614.40           | 446.69           | 551.38           | 502.10           | 2,114.57          |
| 562                           | 1,524.58         | 1,166.47         | 1,133.28         | 1,113.69         | 4,938.01          |
| 563                           | 2,140.75         | 2,053.96         | 2,030.09         | 1,876.68         | 8,101.48          |
| 564                           | 1,076.26         | 895.62           | 1,026.85         | 1,039.72         | 4,038.45          |
| 565                           | 1,228.62         | 1,254.88         | 1,199.64         | 1,056.20         | 4,739.34          |
| 566                           | 697.16           | 811.99           | 801.70           | 704.84           | 3,015.69          |
| 567                           | 699.83           | 558.14           | 583.80           | 622.81           | 2,464.57          |
| <b>MN - MINNESOTA - Total</b> | <b>34,477.21</b> | <b>31,322.14</b> | <b>32,261.78</b> | <b>31,158.43</b> | <b>129,219.55</b> |

**STATE: MO - MISSOURI**

| REGISTRANT ZIP CODE 3 | 1ST QUARTER | 2ND QUARTER | 3RD QUARTER | 4TH QUARTER | TOTAL GRAMS |
|-----------------------|-------------|-------------|-------------|-------------|-------------|
| 630                   | 7,973.94    | 6,538.03    | 6,458.24    | 6,096.55    | 27,066.76   |
| 631                   | 15,692.43   | 16,444.24   | 19,274.13   | 16,642.86   | 68,053.66   |
| 633                   | 3,626.25    | 3,050.70    | 3,195.46    | 3,323.79    | 13,196.20   |
| 634                   | 618.07      | 570.92      | 526.36      | 482.31      | 2,197.66    |
| 635                   | 773.54      | 729.52      | 828.79      | 691.76      | 3,023.60    |
| 636                   | 1,819.99    | 1,821.34    | 1,728.29    | 1,670.24    | 7,039.86    |
| 637                   | 1,122.41    | 723.17      | 1,019.39    | 937.07      | 3,802.04    |
| 638                   | 2,291.35    | 2,276.90    | 2,197.02    | 2,213.51    | 8,978.78    |
| 639                   | 1,324.03    | 1,226.61    | 1,145.01    | 1,003.39    | 4,699.04    |
| 640                   | 5,256.27    | 4,994.14    | 5,639.41    | 4,803.71    | 20,693.52   |
| 641                   | 4,722.97    | 4,843.80    | 4,840.03    | 4,488.38    | 18,895.19   |
| 644                   | 645.90      | 582.17      | 696.13      | 629.13      | 2,553.32    |
| 645                   | 625.64      | 607.22      | 605.13      | 619.67      | 2,457.66    |
| 646                   | 629.87      | 600.89      | 686.51      | 571.46      | 2,488.73    |
| 647                   | 1,447.17    | 1,409.11    | 1,367.77    | 1,405.05    | 5,629.10    |
| 648                   | 1,587.85    | 1,351.84    | 1,498.81    | 1,383.50    | 5,822.00    |
| 650                   | 1,222.82    | 1,040.76    | 989.83      | 1,095.35    | 4,348.76    |
| 651                   | 657.69      | 625.64      | 691.11      | 531.98      | 2,506.43    |

|                              |                  |                  |                  |                  |                   |
|------------------------------|------------------|------------------|------------------|------------------|-------------------|
| 652                          | 1,912.13         | 1,624.65         | 1,815.51         | 1,537.82         | 6,890.11          |
| 653                          | 1,052.36         | 788.43           | 1,165.63         | 844.06           | 3,850.49          |
| 654                          | 627.66           | 773.07           | 615.88           | 641.29           | 2,657.89          |
| 655                          | 1,090.10         | 1,104.04         | 1,088.01         | 1,066.71         | 4,348.86          |
| 656                          | 1,367.48         | 1,088.28         | 1,315.10         | 1,207.82         | 4,978.68          |
| 657                          | 2,446.10         | 2,057.02         | 2,356.68         | 2,518.58         | 9,378.38          |
| 658                          | 2,030.45         | 1,763.08         | 1,902.87         | 1,827.04         | 7,523.44          |
| <b>MO - MISSOURI - Total</b> | <b>62,564.48</b> | <b>58,635.55</b> | <b>63,647.09</b> | <b>58,233.03</b> | <b>243,080.15</b> |

**STATE: MS - MISSISSIPPI**

| REGISTRANT ZIP CODE 3           | 1ST QUARTER      | 2ND QUARTER      | 3RD QUARTER      | 4TH QUARTER      | TOTAL GRAMS      |
|---------------------------------|------------------|------------------|------------------|------------------|------------------|
| 386                             | 3,063.65         | 2,565.07         | 2,479.17         | 2,303.64         | 10,411.53        |
| 387                             | 1,555.91         | 1,450.93         | 1,437.67         | 1,063.06         | 5,507.57         |
| 388                             | 2,764.82         | 2,413.96         | 2,315.25         | 2,237.32         | 9,731.36         |
| 389                             | 1,298.65         | 1,171.35         | 1,133.04         | 897.48           | 4,500.53         |
| 390                             | 2,557.50         | 2,082.79         | 1,949.38         | 1,948.84         | 8,538.51         |
| 391                             | 2,601.57         | 2,288.63         | 2,064.54         | 1,848.95         | 8,803.69         |
| 392                             | 1,421.74         | 1,328.79         | 1,395.98         | 1,440.92         | 5,587.44         |
| 393                             | 2,578.84         | 2,128.83         | 2,091.12         | 1,837.88         | 8,636.68         |
| 394                             | 2,887.89         | 2,769.47         | 2,735.66         | 2,535.65         | 10,928.67        |
| 395                             | 2,856.13         | 2,027.18         | 2,270.45         | 2,235.48         | 9,389.24         |
| 396                             | 853.63           | 779.06           | 958.62           | 1,062.14         | 3,653.45         |
| 397                             | 2,032.92         | 1,701.57         | 1,632.51         | 1,591.55         | 6,958.54         |
| <b>MS - MISSISSIPPI - Total</b> | <b>26,473.27</b> | <b>22,707.65</b> | <b>22,463.40</b> | <b>21,002.91</b> | <b>92,647.22</b> |

**STATE: MT - MONTANA**

| REGISTRANT ZIP CODE 3       | 1ST QUARTER     | 2ND QUARTER     | 3RD QUARTER     | 4TH QUARTER     | TOTAL GRAMS      |
|-----------------------------|-----------------|-----------------|-----------------|-----------------|------------------|
| 590                         | 620.27          | 579.20          | 594.87          | 490.80          | 2,285.14         |
| 591                         | 990.07          | 828.33          | 925.14          | 761.20          | 3,504.74         |
| 592                         | 397.04          | 294.83          | 272.73          | 290.96          | 1,255.55         |
| 593                         | 374.05          | 351.85          | 373.87          | 365.67          | 1,465.44         |
| 594                         | 1,001.15        | 1,019.72        | 1,175.06        | 887.21          | 4,083.14         |
| 595                         | 272.02          | 266.32          | 251.95          | 322.67          | 1,112.97         |
| 596                         | 794.85          | 809.28          | 789.58          | 770.54          | 3,164.25         |
| 597                         | 1,257.81        | 1,094.53        | 1,422.44        | 1,141.43        | 4,916.20         |
| 598                         | 2,408.48        | 2,173.36        | 2,253.07        | 2,048.74        | 8,883.66         |
| 599                         | 1,191.38        | 1,213.39        | 1,340.60        | 1,120.43        | 4,865.79         |
| <b>MT - MONTANA - Total</b> | <b>9,307.13</b> | <b>8,630.81</b> | <b>9,399.30</b> | <b>8,199.65</b> | <b>35,536.89</b> |

**STATE: NC - NORTH CAROLINA**

| REGISTRANT ZIP CODE 3 | 1ST QUARTER | 2ND QUARTER | 3RD QUARTER | 4TH QUARTER | TOTAL GRAMS |
|-----------------------|-------------|-------------|-------------|-------------|-------------|
| 270                   | 1,146.52    | 1,083.31    | 996.38      | 845.91      | 4,072.12    |
| 271                   | 1,191.37    | 920.24      | 951.57      | 896.89      | 3,960.07    |

|                                    |                  |                  |                  |                  |                   |
|------------------------------------|------------------|------------------|------------------|------------------|-------------------|
| 272                                | 2,211.62         | 1,946.74         | 1,882.09         | 2,530.10         | 8,570.56          |
| 273                                | 1,556.21         | 1,567.23         | 1,126.66         | 1,321.80         | 5,571.90          |
| 274                                | 1,878.71         | 1,800.46         | 1,264.96         | 1,472.80         | 6,416.94          |
| 275                                | 4,793.13         | 4,159.72         | 3,831.97         | 4,198.32         | 16,983.15         |
| 276                                | 1,494.38         | 1,438.15         | 1,150.15         | 1,897.63         | 5,980.30          |
| 277                                | 1,172.65         | 1,182.06         | 942.25           | 1,147.45         | 4,444.41          |
| 278                                | 2,867.88         | 2,614.43         | 2,511.20         | 2,664.51         | 10,658.01         |
| 279                                | 1,305.57         | 1,144.24         | 1,246.92         | 1,028.97         | 4,725.69          |
| 280                                | 2,741.02         | 2,388.13         | 2,128.37         | 2,382.61         | 9,640.12          |
| 281                                | 1,980.66         | 2,027.22         | 1,726.77         | 1,683.40         | 7,418.04          |
| 282                                | 2,388.13         | 2,075.93         | 1,547.17         | 1,934.92         | 7,946.15          |
| 283                                | 6,587.46         | 5,478.27         | 5,642.31         | 5,847.48         | 23,555.52         |
| 284                                | 2,146.89         | 2,187.54         | 2,042.73         | 1,923.97         | 8,301.13          |
| 285                                | 3,321.90         | 2,413.83         | 2,662.66         | 2,779.25         | 11,177.65         |
| 286                                | 3,229.40         | 2,782.76         | 2,484.48         | 2,556.88         | 11,053.53         |
| 287                                | 2,149.04         | 1,788.52         | 1,663.22         | 1,736.83         | 7,337.60          |
| 288                                | 793.08           | 592.65           | 564.28           | 599.64           | 2,549.64          |
| 289                                | 861.82           | 712.17           | 613.84           | 710.89           | 2,898.72          |
| <b>NC - NORTH CAROLINA - Total</b> | <b>45,817.43</b> | <b>40,303.60</b> | <b>36,979.98</b> | <b>40,160.23</b> | <b>163,261.25</b> |

**STATE: ND - NORTH DAKOTA**

| REGISTRANT ZIP CODE 3            | 1ST QUARTER     | 2ND QUARTER     | 3RD QUARTER     | 4TH QUARTER     | TOTAL GRAMS      |
|----------------------------------|-----------------|-----------------|-----------------|-----------------|------------------|
| 580                              | 446.99          | 325.61          | 328.01          | 372.03          | 1,472.63         |
| 581                              | 851.38          | 618.08          | 598.61          | 595.56          | 2,663.63         |
| 582                              | 695.77          | 755.18          | 551.62          | 624.33          | 2,626.90         |
| 583                              | 556.95          | 402.24          | 327.09          | 354.72          | 1,641.00         |
| 584                              | 199.60          | 179.86          | 203.11          | 220.79          | 803.36           |
| 585                              | 963.37          | 1,052.14        | 938.50          | 905.06          | 3,859.08         |
| 586                              | 191.26          | 240.23          | 258.11          | 216.10          | 905.71           |
| 587                              | 499.11          | 596.52          | 387.68          | 369.27          | 1,852.57         |
| 588                              | 670.71          | 649.39          | 768.52          | 861.94          | 2,950.56         |
| <b>ND - NORTH DAKOTA - Total</b> | <b>5,075.13</b> | <b>4,819.25</b> | <b>4,361.26</b> | <b>4,519.80</b> | <b>18,775.44</b> |

**STATE: NE - NEBRASKA**

| REGISTRANT ZIP CODE 3 | 1ST QUARTER | 2ND QUARTER | 3RD QUARTER | 4TH QUARTER | TOTAL GRAMS |
|-----------------------|-------------|-------------|-------------|-------------|-------------|
| 680                   | 1,134.85    | 1,075.74    | 1,053.84    | 814.93      | 4,079.36    |
| 681                   | 4,117.96    | 3,540.91    | 3,858.54    | 3,393.12    | 14,910.53   |
| 683                   | 327.07      | 302.76      | 233.52      | 240.33      | 1,103.68    |
| 684                   | 264.18      | 141.63      | 187.86      | 169.51      | 763.18      |
| 685                   | 1,846.37    | 1,633.96    | 1,533.06    | 1,577.46    | 6,590.85    |
| 686                   | 148.81      | 163.73      | 232.61      | 201.67      | 746.81      |
| 687                   | 796.92      | 666.90      | 787.25      | 637.98      | 2,889.04    |



|                              |                  |                 |                  |                 |                  |
|------------------------------|------------------|-----------------|------------------|-----------------|------------------|
| 688                          | 823.07           | 840.46          | 870.54           | 869.38          | 3,403.44         |
| 689                          | 305.36           | 300.01          | 322.21           | 286.94          | 1,214.52         |
| 690                          | 186.53           | 80.45           | 155.62           | 151.38          | 573.98           |
| 691                          | 813.12           | 772.24          | 760.08           | 879.41          | 3,224.85         |
| 692                          | 22.10            | 7.74            | 6.63             | 15.47           | 51.94            |
| 693                          | 434.45           | 381.78          | 434.82           | 397.53          | 1,648.58         |
| <b>NE - NEBRASKA - Total</b> | <b>11,220.79</b> | <b>9,908.30</b> | <b>10,436.56</b> | <b>9,635.11</b> | <b>41,200.75</b> |

**STATE: NH - NEW HAMPSHIRE**

| REGISTRANT ZIP CODE 3             | 1ST QUARTER     | 2ND QUARTER     | 3RD QUARTER     | 4TH QUARTER     | TOTAL GRAMS      |
|-----------------------------------|-----------------|-----------------|-----------------|-----------------|------------------|
| 030                               | 1,753.51        | 1,661.63        | 1,752.97        | 1,780.29        | 6,948.40         |
| 031                               | 1,153.30        | 1,297.39        | 1,357.29        | 1,162.78        | 4,970.76         |
| 032                               | 860.67          | 773.64          | 817.49          | 652.66          | 3,104.46         |
| 033                               | 502.29          | 580.02          | 407.65          | 515.11          | 2,005.07         |
| 034                               | 372.21          | 389.71          | 459.51          | 313.45          | 1,534.86         |
| 035                               | 332.58          | 213.06          | 258.45          | 241.34          | 1,045.43         |
| 036                               | 24.31           | 22.10           | 22.10           | 24.31           | 92.82            |
| 037                               | 480.50          | 418.89          | 388.04          | 411.89          | 1,699.32         |
| 038                               | 1,480.24        | 1,286.23        | 1,073.16        | 1,136.32        | 4,975.94         |
| <b>NH - NEW HAMPSHIRE - Total</b> | <b>6,959.61</b> | <b>6,642.68</b> | <b>6,536.66</b> | <b>6,238.14</b> | <b>26,377.09</b> |

**STATE: NJ - NEW JERSEY**

| REGISTRANT ZIP CODE 3 | 1ST QUARTER | 2ND QUARTER | 3RD QUARTER | 4TH QUARTER | TOTAL GRAMS |
|-----------------------|-------------|-------------|-------------|-------------|-------------|
| 070                   | 10,639.64   | 11,468.87   | 10,265.07   | 10,190.25   | 42,563.84   |
| 071                   | 2,514.77    | 2,460.24    | 2,434.94    | 2,415.94    | 9,825.89    |
| 072                   | 1,033.77    | 1,015.61    | 758.03      | 958.24      | 3,765.64    |
| 073                   | 2,155.99    | 2,466.73    | 2,206.20    | 2,210.15    | 9,039.08    |
| 074                   | 4,331.83    | 4,292.24    | 4,126.77    | 4,196.49    | 16,947.33   |
| 075                   | 1,468.67    | 1,463.74    | 1,199.34    | 1,385.87    | 5,517.63    |
| 076                   | 3,942.41    | 3,741.10    | 3,610.09    | 3,556.80    | 14,850.40   |
| 077                   | 5,706.99    | 5,260.25    | 5,073.80    | 4,930.58    | 20,971.62   |
| 078                   | 2,675.53    | 2,495.86    | 2,331.63    | 2,410.01    | 9,913.03    |
| 079                   | 1,123.70    | 1,356.77    | 1,246.41    | 1,172.96    | 4,899.84    |
| 080                   | 11,980.22   | 12,549.14   | 11,247.92   | 11,018.08   | 46,795.37   |
| 081                   | 1,972.06    | 2,050.69    | 1,605.46    | 1,943.88    | 7,572.08    |
| 082                   | 2,188.92    | 2,082.72    | 2,230.43    | 2,203.64    | 8,705.71    |
| 083                   | 2,114.26    | 2,079.06    | 2,066.79    | 1,944.34    | 8,204.45    |
| 084                   | 351.96      | 368.07      | 414.58      | 387.22      | 1,521.83    |
| 085                   | 1,798.12    | 1,679.71    | 1,633.16    | 1,626.76    | 6,737.76    |
| 086                   | 2,010.97    | 2,227.98    | 1,845.32    | 2,003.84    | 8,088.11    |
| 087                   | 4,115.81    | 4,030.08    | 4,069.90    | 3,983.67    | 16,199.46   |
| 088                   | 6,683.03    | 6,448.97    | 5,867.41    | 6,289.72    | 25,289.14   |

|                                |                  |                  |                  |                  |                   |
|--------------------------------|------------------|------------------|------------------|------------------|-------------------|
| 089                            | 741.87           | 565.70           | 607.86           | 803.18           | <b>2,718.60</b>   |
| <b>NJ - NEW JERSEY - Total</b> | <b>69,550.53</b> | <b>70,103.54</b> | <b>64,841.12</b> | <b>65,631.62</b> | <b>270,126.81</b> |

**STATE: NM - NEW MEXICO**

| REGISTRANT ZIP CODE 3          | 1ST QUARTER      | 2ND QUARTER      | 3RD QUARTER      | 4TH QUARTER      | TOTAL GRAMS      |
|--------------------------------|------------------|------------------|------------------|------------------|------------------|
| 870                            | 1,771.86         | 1,535.09         | 1,664.73         | 1,499.19         | <b>6,470.86</b>  |
| 871                            | 5,540.00         | 4,586.53         | 4,909.55         | 4,345.16         | <b>19,381.24</b> |
| 873                            | 1,694.87         | 1,220.37         | 1,571.59         | 1,334.28         | <b>5,821.10</b>  |
| 874                            | 1,203.58         | 520.40           | 645.34           | 623.61           | <b>2,992.93</b>  |
| 875                            | 1,165.92         | 942.93           | 970.60           | 723.45           | <b>3,802.90</b>  |
| 877                            | 243.84           | 244.02           | 295.59           | 297.43           | <b>1,080.88</b>  |
| 878                            | 114.93           | 53.04            | 47.61            | 86.19            | <b>301.77</b>    |
| 879                            | 95.03            | 68.51            | 164.28           | 169.06           | <b>496.88</b>    |
| 880                            | 2,277.50         | 1,945.65         | 2,100.48         | 2,329.49         | <b>8,653.12</b>  |
| 881                            | 902.93           | 711.65           | 890.76           | 912.19           | <b>3,417.53</b>  |
| 882                            | 2,697.64         | 2,335.49         | 2,411.62         | 2,353.24         | <b>9,797.99</b>  |
| 883                            | 942.96           | 674.26           | 962.12           | 758.23           | <b>3,337.58</b>  |
| 884                            | 64.09            | 163.69           | 139.24           | 85.09            | <b>452.11</b>    |
| <b>NM - NEW MEXICO - Total</b> | <b>18,715.14</b> | <b>15,001.65</b> | <b>16,773.51</b> | <b>15,516.60</b> | <b>66,006.90</b> |

**STATE: NV - NEVADA**

| REGISTRANT ZIP CODE 3      | 1ST QUARTER      | 2ND QUARTER      | 3RD QUARTER      | 4TH QUARTER      | TOTAL GRAMS      |
|----------------------------|------------------|------------------|------------------|------------------|------------------|
| 890                        | 4,799.47         | 5,038.95         | 4,835.87         | 4,361.33         | <b>19,035.62</b> |
| 891                        | 11,661.55        | 10,714.24        | 9,861.64         | 8,902.13         | <b>41,139.56</b> |
| 893                        | 80.89            | 109.40           | 107.63           | 127.96           | <b>425.89</b>    |
| 894                        | 2,173.50         | 1,885.54         | 1,992.57         | 1,918.50         | <b>7,970.12</b>  |
| 895                        | 1,816.13         | 1,678.17         | 1,748.85         | 1,708.89         | <b>6,952.04</b>  |
| 897                        | 673.67           | 519.87           | 591.91           | 417.48           | <b>2,202.92</b>  |
| 898                        | 251.51           | 236.48           | 338.15           | 242.83           | <b>1,068.96</b>  |
| <b>NV - NEVADA - Total</b> | <b>21,456.72</b> | <b>20,182.65</b> | <b>19,476.62</b> | <b>17,679.12</b> | <b>78,795.10</b> |

**STATE: NY - NEW YORK**

| REGISTRANT ZIP CODE 3 | 1ST QUARTER | 2ND QUARTER | 3RD QUARTER | 4TH QUARTER | TOTAL GRAMS      |
|-----------------------|-------------|-------------|-------------|-------------|------------------|
| 063                   | 0           | 4.42        | 2.21        | 0           | <b>6.63</b>      |
| 100                   | 12,172.44   | 11,818.15   | 11,337.69   | 10,580.43   | <b>45,908.72</b> |
| 101                   | 684.33      | 604.33      | 591.16      | 431.92      | <b>2,311.73</b>  |
| 102                   | 22.10       | 8.28        | 32.05       | 19.79       | <b>82.22</b>     |
| 103                   | 2,649.07    | 2,854.59    | 2,599.22    | 2,442.60    | <b>10,545.48</b> |
| 104                   | 9,130.76    | 9,403.97    | 7,964.54    | 8,231.65    | <b>34,730.91</b> |
| 105                   | 2,990.04    | 3,442.35    | 3,033.41    | 2,862.12    | <b>12,327.92</b> |
| 106                   | 604.18      | 518.72      | 522.59      | 517.53      | <b>2,163.01</b>  |
| 107                   | 1,249.97    | 1,289.77    | 1,311.55    | 1,274.87    | <b>5,126.16</b>  |
| 108                   | 341.72      | 451.59      | 388.32      | 274.40      | <b>1,456.03</b>  |

|     |           |           |           |           |                  |
|-----|-----------|-----------|-----------|-----------|------------------|
| 109 | 3,958.69  | 3,808.49  | 3,604.48  | 3,732.64  | <b>15,104.30</b> |
| 110 | 1,414.16  | 1,460.27  | 1,169.76  | 1,177.05  | <b>5,221.23</b>  |
| 111 | 1,187.00  | 1,277.06  | 1,309.19  | 1,130.74  | <b>4,903.99</b>  |
| 112 | 15,716.06 | 16,083.73 | 14,498.74 | 14,549.98 | <b>60,848.52</b> |
| 113 | 5,703.69  | 6,020.88  | 5,523.21  | 5,320.97  | <b>22,568.75</b> |
| 114 | 3,100.20  | 3,566.35  | 2,753.03  | 2,617.30  | <b>12,036.89</b> |
| 115 | 3,810.43  | 3,847.09  | 3,875.85  | 3,153.61  | <b>14,686.98</b> |
| 116 | 826.86    | 878.70    | 754.93    | 744.06    | <b>3,204.55</b>  |
| 117 | 7,506.41  | 7,366.91  | 6,796.54  | 6,686.98  | <b>28,356.83</b> |
| 118 | 478.25    | 512.90    | 523.96    | 467.02    | <b>1,982.14</b>  |
| 119 | 1,120.36  | 1,213.15  | 1,167.13  | 1,066.86  | <b>4,567.50</b>  |
| 120 | 1,680.57  | 1,420.76  | 1,436.50  | 1,587.43  | <b>6,125.26</b>  |
| 121 | 831.35    | 576.46    | 635.39    | 596.81    | <b>2,640.01</b>  |
| 122 | 541.84    | 609.93    | 618.95    | 632.64    | <b>2,403.35</b>  |
| 123 | 815.24    | 559.88    | 586.95    | 704.37    | <b>2,666.45</b>  |
| 124 | 943.78    | 1,048.20  | 1,166.92  | 912.94    | <b>4,071.84</b>  |
| 125 | 2,358.10  | 2,655.31  | 2,253.88  | 2,534.21  | <b>9,801.49</b>  |
| 126 | 370.37    | 427.00    | 398.46    | 372.95    | <b>1,568.78</b>  |
| 127 | 1,308.18  | 1,314.81  | 1,327.15  | 1,289.67  | <b>5,239.82</b>  |
| 128 | 1,667.17  | 1,400.04  | 1,434.49  | 1,335.86  | <b>5,837.56</b>  |
| 129 | 1,418.29  | 1,256.69  | 1,251.33  | 1,354.64  | <b>5,280.95</b>  |
| 130 | 3,072.21  | 2,904.44  | 2,839.97  | 2,954.77  | <b>11,771.39</b> |
| 131 | 1,077.85  | 978.30    | 933.82    | 1,001.68  | <b>3,991.66</b>  |
| 132 | 1,775.49  | 1,494.72  | 1,470.30  | 1,534.66  | <b>6,275.17</b>  |
| 133 | 905.62    | 838.06    | 664.55    | 679.30    | <b>3,087.53</b>  |
| 134 | 953.98    | 828.49    | 946.37    | 773.97    | <b>3,502.80</b>  |
| 135 | 450.30    | 480.23    | 351.77    | 456.10    | <b>1,738.40</b>  |
| 136 | 3,572.39  | 3,950.75  | 3,766.16  | 3,875.92  | <b>15,165.22</b> |
| 137 | 863.44    | 822.08    | 682.62    | 634.20    | <b>3,002.34</b>  |
| 138 | 1,123.60  | 1,001.32  | 932.27    | 985.95    | <b>4,043.15</b>  |
| 139 | 837.03    | 874.97    | 870.46    | 708.95    | <b>3,291.41</b>  |
| 140 | 4,395.56  | 4,464.38  | 4,487.63  | 4,495.55  | <b>17,843.12</b> |
| 141 | 2,205.63  | 2,002.85  | 2,103.39  | 1,978.91  | <b>8,290.78</b>  |
| 142 | 9,096.16  | 9,164.91  | 9,140.17  | 8,838.32  | <b>36,239.55</b> |
| 143 | 596.90    | 784.55    | 623.22    | 532.26    | <b>2,536.93</b>  |
| 144 | 2,414.58  | 2,344.31  | 2,227.46  | 1,969.72  | <b>8,956.06</b>  |
| 145 | 1,859.10  | 1,832.19  | 1,693.09  | 1,638.33  | <b>7,022.70</b>  |
| 146 | 3,783.83  | 3,479.84  | 3,410.06  | 3,445.75  | <b>14,119.47</b> |
| 147 | 1,117.08  | 1,090.65  | 989.16    | 998.37    | <b>4,195.26</b>  |
| 148 | 1,874.17  | 1,754.93  | 1,955.93  | 1,804.81  | <b>7,389.84</b>  |

|                              |                   |                   |                   |                   |                   |
|------------------------------|-------------------|-------------------|-------------------|-------------------|-------------------|
| 149                          | 388.77            | 399.11            | 279.94            | 289.89            | <b>1,357.70</b>   |
| <b>NY - NEW YORK - Total</b> | <b>128,965.32</b> | <b>129,191.83</b> | <b>121,237.90</b> | <b>118,201.43</b> | <b>497,596.48</b> |

**STATE: OH - OHIO**

| REGISTRANT ZIP CODE 3    | 1ST QUARTER      | 2ND QUARTER      | 3RD QUARTER      | 4TH QUARTER      | TOTAL GRAMS       |
|--------------------------|------------------|------------------|------------------|------------------|-------------------|
| 430                      | 4,029.00         | 4,387.06         | 3,764.69         | 3,071.88         | 15,252.64         |
| 431                      | 2,955.66         | 2,672.19         | 2,949.12         | 2,470.08         | 11,047.04         |
| 432                      | 11,847.56        | 7,992.16         | 4,475.47         | 4,082.71         | 28,397.90         |
| 433                      | 1,008.72         | 865.63           | 798.14           | 738.65           | 3,411.13          |
| 434                      | 1,191.82         | 1,079.02         | 1,184.98         | 921.42           | 4,377.23          |
| 435                      | 2,927.20         | 2,660.15         | 2,365.85         | 2,110.96         | 10,064.16         |
| 436                      | 5,769.57         | 5,336.43         | 5,302.62         | 4,339.81         | 20,748.43         |
| 437                      | 1,520.95         | 1,253.25         | 1,468.19         | 1,152.31         | 5,394.69          |
| 438                      | 306.10           | 298.55           | 279.94           | 267.79           | 1,152.37          |
| 439                      | 2,002.44         | 2,015.60         | 1,849.73         | 1,570.45         | 7,438.22          |
| 440                      | 4,643.98         | 4,151.29         | 4,512.00         | 4,194.17         | 17,501.44         |
| 441                      | 8,624.38         | 8,725.08         | 8,111.20         | 7,163.25         | 32,623.91         |
| 442                      | 2,192.99         | 2,250.37         | 2,172.38         | 1,959.40         | 8,575.15          |
| 443                      | 1,252.66         | 1,142.78         | 1,073.12         | 868.73           | 4,337.29          |
| 444                      | 2,677.51         | 3,476.43         | 2,926.71         | 2,055.19         | 11,135.82         |
| 445                      | 1,544.48         | 1,869.62         | 1,763.47         | 1,245.77         | 6,423.33          |
| 446                      | 2,149.61         | 1,837.21         | 1,967.24         | 1,791.98         | 7,746.04          |
| 447                      | 1,908.92         | 1,555.37         | 1,517.08         | 1,622.54         | 6,603.90          |
| 448                      | 1,637.84         | 1,545.92         | 1,778.74         | 1,621.27         | 6,583.76          |
| 449                      | 829.99           | 945.55           | 846.47           | 772.98           | 3,394.98          |
| 450                      | 3,837.57         | 3,699.07         | 3,039.30         | 3,151.63         | 13,727.57         |
| 451                      | 1,939.64         | 1,390.86         | 1,709.19         | 1,417.74         | 6,457.43          |
| 452                      | 5,955.39         | 5,070.05         | 5,137.62         | 4,280.52         | 20,443.58         |
| 453                      | 3,386.08         | 3,048.05         | 3,148.14         | 2,587.96         | 12,170.24         |
| 454                      | 3,881.36         | 3,600.79         | 3,358.71         | 3,196.98         | 14,037.84         |
| 455                      | 657.28           | 625.75           | 571.39           | 619.54           | 2,473.96          |
| 456                      | 3,038.85         | 2,702.11         | 2,673.38         | 2,571.44         | 10,985.77         |
| 457                      | 1,365.18         | 1,333.47         | 1,240.59         | 1,161.64         | 5,100.89          |
| 458                      | 2,839.03         | 2,369.64         | 2,481.20         | 2,259.24         | 9,949.11          |
| <b>OH - OHIO - Total</b> | <b>87,921.76</b> | <b>79,899.41</b> | <b>74,466.66</b> | <b>65,268.02</b> | <b>307,555.84</b> |

**STATE: OK - OKLAHOMA**

| REGISTRANT ZIP CODE 3 | 1ST QUARTER | 2ND QUARTER | 3RD QUARTER | 4TH QUARTER | TOTAL GRAMS |
|-----------------------|-------------|-------------|-------------|-------------|-------------|
| 730                   | 13,124.28   | 13,747.19   | 13,504.01   | 12,249.36   | 52,624.84   |
| 731                   | 13,274.64   | 12,167.17   | 12,027.83   | 10,698.52   | 48,168.15   |
| 734                   | 3,875.59    | 3,760.12    | 3,593.17    | 3,325.46    | 14,554.33   |
| 735                   | 9,604.81    | 9,123.74    | 8,465.57    | 7,843.38    | 35,037.50   |

|                              |                  |                  |                  |                  |                   |
|------------------------------|------------------|------------------|------------------|------------------|-------------------|
| 736                          | 2,170.50         | 2,319.77         | 2,073.33         | 1,921.68         | 8,485.28          |
| 737                          | 1,969.00         | 1,744.98         | 1,816.14         | 1,696.25         | 7,226.37          |
| 738                          | 626.19           | 553.61           | 466.51           | 355.74           | 2,002.04          |
| 739                          | 495.24           | 495.24           | 367.24           | 434.47           | 1,792.20          |
| 740                          | 10,357.73        | 9,674.38         | 9,727.65         | 9,883.33         | 39,643.10         |
| 741                          | 3,767.35         | 3,492.79         | 3,990.31         | 3,864.00         | 15,114.46         |
| 743                          | 3,569.61         | 3,617.93         | 3,760.49         | 3,380.70         | 14,328.72         |
| 744                          | 6,490.61         | 6,078.68         | 6,177.42         | 5,701.60         | 24,448.31         |
| 745                          | 2,083.02         | 1,897.46         | 1,961.46         | 1,944.89         | 7,886.83          |
| 746                          | 1,772.50         | 1,538.23         | 1,594.59         | 1,549.28         | 6,454.60          |
| 747                          | 6,401.94         | 6,673.40         | 6,371.72         | 5,897.65         | 25,344.71         |
| 748                          | 8,599.29         | 8,235.73         | 8,921.13         | 8,179.92         | 33,936.07         |
| 749                          | 3,261.00         | 2,465.37         | 2,638.86         | 2,683.06         | 11,048.29         |
| <b>OK - OKLAHOMA - Total</b> | <b>91,443.31</b> | <b>87,585.78</b> | <b>87,457.44</b> | <b>81,609.29</b> | <b>348,095.81</b> |

**STATE: OR - OREGON**

| REGISTRANT ZIP CODE 3      | 1ST QUARTER      | 2ND QUARTER      | 3RD QUARTER      | 4TH QUARTER      | TOTAL GRAMS       |
|----------------------------|------------------|------------------|------------------|------------------|-------------------|
| 970                        | 6,383.42         | 5,694.98         | 5,707.54         | 4,850.18         | 22,636.11         |
| 971                        | 2,247.17         | 2,154.47         | 2,167.65         | 2,005.36         | 8,574.65          |
| 972                        | 7,467.57         | 6,978.60         | 6,871.89         | 6,279.17         | 27,597.24         |
| 973                        | 4,611.93         | 4,156.71         | 4,251.83         | 4,182.54         | 17,203.01         |
| 974                        | 4,816.88         | 4,345.72         | 4,504.27         | 3,930.36         | 17,597.23         |
| 975                        | 3,628.32         | 3,332.62         | 3,085.29         | 3,082.31         | 13,128.54         |
| 976                        | 476.49           | 436.43           | 433.96           | 447.18           | 1,794.06          |
| 977                        | 1,728.97         | 1,490.38         | 1,635.67         | 1,529.37         | 6,384.39          |
| 978                        | 1,652.97         | 1,434.15         | 1,424.11         | 1,332.59         | 5,843.83          |
| 979                        | 282.63           | 194.49           | 274.94           | 274.72           | 1,026.77          |
| <b>OR - OREGON - Total</b> | <b>33,296.35</b> | <b>30,218.54</b> | <b>30,357.15</b> | <b>27,913.79</b> | <b>121,785.82</b> |

**STATE: PA - PENNSYLVANIA**

| REGISTRANT ZIP CODE 3 | 1ST QUARTER | 2ND QUARTER | 3RD QUARTER | 4TH QUARTER | TOTAL GRAMS |
|-----------------------|-------------|-------------|-------------|-------------|-------------|
| 150                   | 3,377.25    | 3,002.01    | 2,874.45    | 2,971.97    | 12,225.67   |
| 151                   | 2,753.58    | 2,706.86    | 2,287.69    | 2,488.77    | 10,236.90   |
| 152                   | 4,685.46    | 4,732.43    | 4,527.68    | 4,432.10    | 18,377.66   |
| 153                   | 1,295.78    | 1,378.43    | 1,296.08    | 1,175.50    | 5,145.78    |
| 154                   | 1,044.23    | 968.50      | 958.56      | 990.40      | 3,961.69    |
| 155                   | 3,119.60    | 2,355.90    | 2,724.17    | 2,477.76    | 10,677.43   |
| 156                   | 1,843.68    | 1,769.85    | 1,698.83    | 1,840.90    | 7,153.25    |
| 157                   | 1,466.41    | 1,168.48    | 1,283.81    | 1,409.09    | 5,327.79    |
| 158                   | 629.50      | 600.04      | 802.27      | 504.08      | 2,535.90    |
| 159                   | 1,342.02    | 1,189.27    | 1,244.87    | 1,324.37    | 5,100.53    |
| 160                   | 1,387.98    | 1,281.98    | 1,554.35    | 1,380.35    | 5,604.66    |

|                                  |                   |                   |                   |                   |                   |
|----------------------------------|-------------------|-------------------|-------------------|-------------------|-------------------|
| 161                              | 1,570.51          | 1,396.81          | 1,496.35          | 1,443.96          | 5,907.62          |
| 162                              | 1,116.52          | 1,171.33          | 1,202.28          | 1,070.15          | 4,560.29          |
| 163                              | 1,197.80          | 1,217.52          | 1,221.52          | 973.29            | 4,610.14          |
| 164                              | 688.21            | 614.11            | 621.57            | 470.17            | 2,394.06          |
| 165                              | 1,674.76          | 1,404.31          | 1,180.18          | 1,319.82          | 5,579.08          |
| 166                              | 1,574.88          | 1,342.48          | 1,372.00          | 1,238.12          | 5,527.48          |
| 167                              | 492.85            | 508.32            | 507.22            | 480.70            | 1,989.09          |
| 168                              | 586.21            | 617.38            | 709.48            | 578.21            | 2,491.28          |
| 169                              | 526.71            | 416.77            | 383.05            | 399.99            | 1,726.52          |
| 170                              | 4,351.21          | 4,156.78          | 3,978.77          | 3,841.39          | 16,328.15         |
| 171                              | 1,109.67          | 1,254.58          | 858.34            | 1,071.16          | 4,293.74          |
| 172                              | 1,366.55          | 1,180.78          | 1,095.16          | 1,157.22          | 4,799.71          |
| 173                              | 2,312.40          | 2,153.42          | 2,013.65          | 2,115.09          | 8,594.57          |
| 174                              | 1,331.19          | 1,192.04          | 1,273.63          | 1,091.25          | 4,888.11          |
| 175                              | 1,291.05          | 1,255.32          | 1,286.89          | 1,064.33          | 4,897.60          |
| 176                              | 1,285.44          | 1,382.99          | 1,072.96          | 1,008.02          | 4,749.41          |
| 177                              | 1,009.85          | 962.72            | 980.22            | 971.21            | 3,924.00          |
| 178                              | 1,448.83          | 1,563.08          | 1,539.10          | 1,552.89          | 6,103.91          |
| 179                              | 1,375.55          | 1,405.77          | 1,229.54          | 1,345.85          | 5,356.71          |
| 180                              | 2,863.94          | 2,603.22          | 2,528.29          | 2,408.00          | 10,403.45         |
| 181                              | 1,253.91          | 1,532.53          | 1,088.90          | 1,243.87          | 5,119.21          |
| 182                              | 1,119.97          | 978.52            | 858.43            | 981.56            | 3,938.48          |
| 183                              | 1,726.91          | 1,620.55          | 1,727.46          | 1,594.19          | 6,669.11          |
| 184                              | 1,690.40          | 1,614.36          | 1,651.65          | 1,598.90          | 6,555.31          |
| 185                              | 1,433.92          | 1,572.41          | 1,379.39          | 1,368.44          | 5,754.16          |
| 186                              | 1,872.32          | 2,121.05          | 1,924.64          | 1,879.79          | 7,797.80          |
| 187                              | 2,869.83          | 3,981.93          | 3,546.02          | 3,278.15          | 13,675.94         |
| 188                              | 840.28            | 899.58            | 1,132.15          | 1,151.47          | 4,023.48          |
| 189                              | 3,403.42          | 2,860.08          | 2,888.08          | 3,173.63          | 12,325.21         |
| 190                              | 12,758.96         | 13,112.03         | 11,732.96         | 11,441.58         | 49,045.53         |
| 191                              | 22,016.80         | 22,948.73         | 20,580.07         | 20,064.76         | 85,610.35         |
| 193                              | 3,148.78          | 2,745.68          | 2,527.59          | 2,633.30          | 11,055.35         |
| 194                              | 7,080.81          | 6,108.81          | 5,827.78          | 5,211.46          | 24,228.85         |
| 195                              | 1,448.39          | 1,477.20          | 1,215.97          | 1,370.76          | 5,512.32          |
| 196                              | 2,135.85          | 1,999.58          | 1,831.50          | 1,919.32          | 7,886.26          |
| <b>PA - PENNSYLVANIA - Total</b> | <b>116,920.14</b> | <b>114,526.52</b> | <b>107,715.57</b> | <b>105,507.30</b> | <b>444,669.53</b> |

**STATE: PR - PUERTO RICO**

| REGISTRANT ZIP CODE 3 | 1ST QUARTER | 2ND QUARTER | 3RD QUARTER | 4TH QUARTER | TOTAL GRAMS |
|-----------------------|-------------|-------------|-------------|-------------|-------------|
| 006                   | 4,543.97    | 4,725.19    | 4,853.38    | 4,087.58    | 18,210.12   |
| 007                   | 4,015.75    | 4,528.49    | 4,227.92    | 3,634.51    | 16,406.68   |

|                                 |                  |                  |                  |                  |                  |
|---------------------------------|------------------|------------------|------------------|------------------|------------------|
| 009                             | 2,928.38         | 3,152.71         | 3,253.27         | 2,948.27         | <b>12,282.63</b> |
| <b>PR - PUERTO RICO - Total</b> | <b>11,488.10</b> | <b>12,406.40</b> | <b>12,334.57</b> | <b>10,670.36</b> | <b>46,899.43</b> |

**STATE: RI - RHODE ISLAND**

| REGISTRANT ZIP CODE 3            | 1ST QUARTER     | 2ND QUARTER     | 3RD QUARTER     | 4TH QUARTER     | TOTAL GRAMS      |
|----------------------------------|-----------------|-----------------|-----------------|-----------------|------------------|
| 028                              | 3,848.01        | 3,928.98        | 3,404.88        | 3,456.93        | <b>14,638.81</b> |
| 029                              | 2,339.33        | 2,233.54        | 1,823.84        | 1,977.72        | <b>8,374.42</b>  |
| <b>RI - RHODE ISLAND - Total</b> | <b>6,187.34</b> | <b>6,162.52</b> | <b>5,228.73</b> | <b>5,434.65</b> | <b>23,013.23</b> |

**STATE: SC - SOUTH CAROLINA**

| REGISTRANT ZIP CODE 3              | 1ST QUARTER      | 2ND QUARTER      | 3RD QUARTER      | 4TH QUARTER      | TOTAL GRAMS       |
|------------------------------------|------------------|------------------|------------------|------------------|-------------------|
| 290                                | 2,615.51         | 2,723.66         | 2,245.62         | 2,678.68         | <b>10,263.47</b>  |
| 291                                | 3,139.78         | 2,786.55         | 2,555.15         | 2,594.84         | <b>11,076.32</b>  |
| 292                                | 3,225.51         | 3,160.48         | 3,148.80         | 2,794.17         | <b>12,328.97</b>  |
| 293                                | 3,455.53         | 3,097.25         | 3,151.32         | 3,455.79         | <b>13,159.90</b>  |
| 294                                | 38,761.13        | 40,414.87        | 42,185.55        | 32,678.75        | <b>154,040.29</b> |
| 295                                | 9,741.68         | 8,494.13         | 8,623.98         | 8,190.33         | <b>35,050.12</b>  |
| 296                                | 6,954.57         | 6,425.03         | 6,402.34         | 5,750.38         | <b>25,532.32</b>  |
| 297                                | 1,880.36         | 1,461.96         | 1,592.44         | 1,514.25         | <b>6,449.01</b>   |
| 298                                | 2,240.40         | 2,303.08         | 1,951.69         | 2,111.20         | <b>8,606.37</b>   |
| 299                                | 1,288.80         | 1,094.53         | 1,022.63         | 1,062.14         | <b>4,468.10</b>   |
| <b>SC - SOUTH CAROLINA - Total</b> | <b>73,303.29</b> | <b>71,961.54</b> | <b>72,879.51</b> | <b>62,830.54</b> | <b>280,974.88</b> |

**STATE: SD - SOUTH DAKOTA**

| REGISTRANT ZIP CODE 3            | 1ST QUARTER     | 2ND QUARTER     | 3RD QUARTER     | 4TH QUARTER     | TOTAL GRAMS      |
|----------------------------------|-----------------|-----------------|-----------------|-----------------|------------------|
| 570                              | 819.47          | 844.19          | 889.63          | 722.08          | <b>3,275.38</b>  |
| 571                              | 1,749.41        | 1,666.12        | 1,890.26        | 1,573.41        | <b>6,879.21</b>  |
| 572                              | 411.99          | 357.10          | 405.18          | 331.70          | <b>1,505.96</b>  |
| 573                              | 592.53          | 419.21          | 494.02          | 479.33          | <b>1,985.09</b>  |
| 574                              | 519.92          | 460.79          | 524.68          | 441.76          | <b>1,947.15</b>  |
| 575                              | 225.79          | 167.59          | 222.12          | 184.54          | <b>800.04</b>    |
| 576                              | 232.06          | 227.64          | 176.81          | 207.75          | <b>844.26</b>    |
| 577                              | 1,404.35        | 1,367.24        | 1,367.26        | 1,473.89        | <b>5,612.74</b>  |
| <b>SD - SOUTH DAKOTA - Total</b> | <b>5,955.53</b> | <b>5,509.88</b> | <b>5,969.95</b> | <b>5,414.47</b> | <b>22,849.83</b> |

**STATE: TN - TENNESSEE**

| REGISTRANT ZIP CODE 3 | 1ST QUARTER | 2ND QUARTER | 3RD QUARTER | 4TH QUARTER | TOTAL GRAMS       |
|-----------------------|-------------|-------------|-------------|-------------|-------------------|
| 370                   | 5,399.82    | 4,369.25    | 4,088.82    | 4,230.84    | <b>18,088.72</b>  |
| 371                   | 33,189.97   | 30,402.29   | 36,821.98   | 25,715.42   | <b>126,129.66</b> |
| 372                   | 3,268.89    | 2,089.51    | 2,144.92    | 2,035.12    | <b>9,538.45</b>   |
| 373                   | 3,400.07    | 3,027.45    | 2,832.23    | 2,902.77    | <b>12,162.52</b>  |
| 374                   | 1,459.03    | 1,261.58    | 1,206.79    | 1,126.22    | <b>5,053.62</b>   |
| 376                   | 2,724.86    | 2,385.79    | 2,145.94    | 2,176.83    | <b>9,433.42</b>   |
| 377                   | 2,498.74    | 2,652.66    | 2,206.80    | 2,094.05    | <b>9,452.26</b>   |

|                               |                  |                  |                  |                  |                   |
|-------------------------------|------------------|------------------|------------------|------------------|-------------------|
| 378                           | 4,437.00         | 3,511.89         | 3,533.28         | 3,278.10         | 14,760.27         |
| 379                           | 2,545.15         | 2,267.60         | 2,349.65         | 2,150.65         | 9,313.06          |
| 380                           | 2,528.78         | 2,168.84         | 2,062.28         | 1,757.84         | 8,517.74          |
| 381                           | 4,863.65         | 4,599.98         | 4,265.91         | 3,539.82         | 17,269.36         |
| 382                           | 880.34           | 936.33           | 740.75           | 832.19           | 3,389.61          |
| 383                           | 3,808.30         | 3,346.52         | 3,305.56         | 3,088.59         | 13,548.96         |
| 384                           | 1,040.31         | 997.12           | 906.51           | 741.11           | 3,685.04          |
| 385                           | 2,390.59         | 2,324.65         | 1,834.75         | 2,067.51         | 8,617.49          |
| <b>TN - TENNESSEE - Total</b> | <b>74,435.49</b> | <b>66,341.46</b> | <b>70,446.16</b> | <b>57,737.07</b> | <b>268,960.19</b> |

**STATE: TX - TEXAS**

| REGISTRANT ZIP CODE 3 | 1ST QUARTER | 2ND QUARTER | 3RD QUARTER | 4TH QUARTER | TOTAL GRAMS |
|-----------------------|-------------|-------------|-------------|-------------|-------------|
| 750                   | 62,268.75   | 65,316.58   | 64,270.50   | 60,437.20   | 252,293.03  |
| 751                   | 30,139.30   | 30,763.75   | 29,328.58   | 27,616.53   | 117,848.16  |
| 752                   | 33,921.27   | 36,691.63   | 33,816.78   | 32,521.62   | 136,951.30  |
| 753                   | 566.98      | 614.59      | 629.88      | 598.94      | 2,410.39    |
| 754                   | 19,964.09   | 20,712.22   | 19,996.52   | 18,782.78   | 79,455.60   |
| 755                   | 8,381.99    | 8,139.97    | 8,408.51    | 7,728.72    | 32,659.19   |
| 756                   | 23,699.47   | 25,476.19   | 24,923.66   | 24,146.81   | 98,246.13   |
| 757                   | 23,694.17   | 26,745.58   | 26,459.07   | 26,297.01   | 103,195.83  |
| 758                   | 4,612.79    | 4,597.23    | 4,293.34    | 4,041.39    | 17,544.75   |
| 759                   | 17,536.49   | 17,639.81   | 17,703.98   | 17,199.34   | 70,079.62   |
| 760                   | 45,993.15   | 47,573.74   | 44,101.42   | 44,155.45   | 181,823.76  |
| 761                   | 35,879.28   | 36,277.17   | 33,884.15   | 33,100.64   | 139,141.25  |
| 762                   | 16,733.17   | 16,769.60   | 16,416.96   | 15,789.22   | 65,708.94   |
| 763                   | 11,445.70   | 11,445.89   | 10,843.09   | 11,229.86   | 44,964.54   |
| 764                   | 6,595.38    | 6,935.76    | 6,792.91    | 7,202.18    | 27,526.23   |
| 765                   | 15,673.20   | 15,086.29   | 14,723.29   | 13,040.32   | 58,523.10   |
| 766                   | 5,205.16    | 5,146.06    | 4,487.61    | 4,703.09    | 19,541.92   |
| 767                   | 7,933.61    | 8,609.38    | 8,254.23    | 7,812.03    | 32,609.25   |
| 768                   | 6,781.69    | 6,711.15    | 6,550.74    | 6,341.97    | 26,385.55   |
| 769                   | 6,618.14    | 6,343.53    | 6,298.79    | 6,108.72    | 25,369.18   |
| 770                   | 78,415.67   | 81,540.18   | 74,330.70   | 72,146.78   | 306,433.33  |
| 772                   | 0           | 0           | 4.42        | 4.42        | 8.84        |
| 773                   | 41,930.83   | 44,120.79   | 40,819.24   | 39,303.67   | 166,174.54  |
| 774                   | 32,054.49   | 31,860.80   | 30,332.86   | 30,367.00   | 124,615.15  |
| 775                   | 45,028.15   | 45,728.97   | 41,694.06   | 40,264.04   | 172,715.21  |
| 776                   | 15,677.58   | 15,815.06   | 15,153.94   | 15,675.99   | 62,322.56   |
| 777                   | 9,184.57    | 9,289.58    | 8,933.59    | 8,922.05    | 36,329.78   |
| 778                   | 11,435.87   | 11,080.44   | 11,059.49   | 10,593.40   | 44,169.20   |
| 779                   | 4,935.32    | 5,222.65    | 4,980.82    | 5,012.87    | 20,151.67   |



|                           |                   |                   |                   |                   |                     |
|---------------------------|-------------------|-------------------|-------------------|-------------------|---------------------|
| 780                       | 14,644.63         | 15,206.74         | 14,436.30         | 14,045.74         | 58,333.40           |
| 781                       | 12,714.58         | 13,111.27         | 12,355.95         | 12,436.79         | 50,618.58           |
| 782                       | 69,441.33         | 71,359.74         | 65,618.67         | 65,368.89         | 271,788.61          |
| 783                       | 12,849.83         | 12,753.48         | 11,857.19         | 11,808.11         | 49,268.60           |
| 784                       | 15,855.27         | 16,406.16         | 15,437.03         | 15,647.10         | 63,345.56           |
| 785                       | 30,770.25         | 29,605.23         | 26,833.32         | 25,688.71         | 112,897.51          |
| 786                       | 19,538.47         | 19,412.15         | 18,957.85         | 18,838.99         | 76,747.45           |
| 787                       | 16,702.69         | 17,326.35         | 16,182.42         | 15,869.65         | 66,081.11           |
| 788                       | 5,456.83          | 5,544.47          | 4,980.46          | 4,827.96          | 20,809.73           |
| 789                       | 1,847.35          | 1,622.21          | 1,472.29          | 1,663.28          | 6,605.13            |
| 790                       | 7,568.31          | 7,840.59          | 8,041.55          | 8,032.28          | 31,482.73           |
| 791                       | 15,651.54         | 14,870.64         | 15,154.40         | 14,280.61         | 59,957.18           |
| 792                       | 1,443.92          | 1,308.18          | 1,269.14          | 1,302.30          | 5,323.55            |
| 793                       | 6,037.05          | 6,005.71          | 5,741.76          | 5,620.86          | 23,405.37           |
| 794                       | 14,003.26         | 14,178.72         | 14,063.95         | 14,013.39         | 56,259.31           |
| 795                       | 2,863.97          | 3,147.18          | 3,115.06          | 2,864.31          | 11,990.52           |
| 796                       | 8,988.88          | 9,204.06          | 9,109.47          | 9,138.03          | 36,440.45           |
| 797                       | 23,113.94         | 23,462.23         | 22,624.79         | 21,134.76         | 90,335.73           |
| 798                       | 1,324.79          | 1,185.72          | 1,206.71          | 1,248.89          | 4,966.12            |
| 799                       | 25,938.00         | 24,872.49         | 25,477.36         | 22,977.14         | 99,264.98           |
| <b>TX - TEXAS - Total</b> | <b>929,061.13</b> | <b>950,677.88</b> | <b>903,428.79</b> | <b>877,951.82</b> | <b>3,661,119.62</b> |

**STATE: UT - UTAH**

| REGISTRANT ZIP CODE 3    | 1ST QUARTER      | 2ND QUARTER      | 3RD QUARTER      | 4TH QUARTER      | TOTAL GRAMS      |
|--------------------------|------------------|------------------|------------------|------------------|------------------|
| 840                      | 7,339.37         | 6,088.65         | 5,991.64         | 5,864.27         | 25,283.92        |
| 841                      | 3,640.41         | 2,927.03         | 2,942.99         | 2,861.59         | 12,372.02        |
| 843                      | 833.16           | 665.97           | 696.52           | 672.35           | 2,868.00         |
| 844                      | 1,019.18         | 838.77           | 756.23           | 780.78           | 3,394.97         |
| 845                      | 512.74           | 475.17           | 383.67           | 422.31           | 1,793.90         |
| 846                      | 1,945.27         | 1,591.16         | 1,833.53         | 1,806.32         | 7,176.28         |
| 847                      | 1,589.41         | 1,351.46         | 1,517.88         | 1,489.96         | 5,948.72         |
| <b>UT - UTAH - Total</b> | <b>16,879.56</b> | <b>13,938.22</b> | <b>14,122.46</b> | <b>13,897.58</b> | <b>58,837.81</b> |

**STATE: VA - VIRGINIA**

| REGISTRANT ZIP CODE 3 | 1ST QUARTER | 2ND QUARTER | 3RD QUARTER | 4TH QUARTER | TOTAL GRAMS |
|-----------------------|-------------|-------------|-------------|-------------|-------------|
| 201                   | 5,316.20    | 4,641.16    | 4,457.35    | 4,615.96    | 19,030.67   |
| 220                   | 3,265.27    | 3,265.10    | 3,273.74    | 3,050.54    | 12,854.65   |
| 221                   | 2,830.04    | 2,637.70    | 2,695.66    | 2,453.10    | 10,616.50   |
| 222                   | 999.23      | 836.86      | 1,035.86    | 847.54      | 3,719.48    |
| 223                   | 2,127.90    | 1,554.91    | 1,742.35    | 1,617.62    | 7,042.78    |
| 224                   | 2,199.46    | 1,975.68    | 1,969.14    | 2,072.63    | 8,216.91    |
| 225                   | 1,074.54    | 1,028.71    | 821.19      | 1,019.60    | 3,944.04    |

|                              |                  |                  |                  |                  |                   |
|------------------------------|------------------|------------------|------------------|------------------|-------------------|
| 226                          | 982.26           | 924.19           | 947.65           | 1,118.48         | 3,972.58          |
| 227                          | 361.53           | 368.33           | 311.31           | 279.01           | 1,320.18          |
| 228                          | 997.93           | 750.95           | 1,004.83         | 884.93           | 3,638.64          |
| 229                          | 1,502.37         | 1,276.17         | 1,407.30         | 1,057.92         | 5,243.76          |
| 230                          | 1,147.25         | 1,061.15         | 1,036.71         | 854.28           | 4,099.39          |
| 231                          | 1,669.17         | 1,777.23         | 1,451.17         | 1,509.00         | 6,406.58          |
| 232                          | 3,831.41         | 3,726.09         | 3,666.69         | 3,176.19         | 14,400.37         |
| 233                          | 1,292.82         | 1,189.88         | 1,188.75         | 1,294.46         | 4,965.91          |
| 234                          | 3,432.65         | 3,309.04         | 3,329.95         | 3,193.66         | 13,265.30         |
| 235                          | 1,335.54         | 1,329.49         | 1,101.17         | 1,210.60         | 4,976.79          |
| 236                          | 2,653.97         | 2,423.10         | 2,320.88         | 2,199.45         | 9,597.41          |
| 237                          | 943.84           | 593.14           | 760.63           | 630.22           | 2,927.83          |
| 238                          | 2,056.11         | 1,846.38         | 1,709.14         | 1,824.95         | 7,436.58          |
| 239                          | 440.30           | 421.84           | 412.73           | 425.99           | 1,700.86          |
| 240                          | 1,537.74         | 1,687.54         | 1,352.75         | 1,354.52         | 5,932.55          |
| 241                          | 1,433.97         | 1,158.61         | 913.37           | 921.60           | 4,427.55          |
| 242                          | 1,577.89         | 1,447.41         | 1,297.33         | 1,293.25         | 5,615.88          |
| 243                          | 983.70           | 886.70           | 718.48           | 758.43           | 3,347.31          |
| 244                          | 630.47           | 507.34           | 572.27           | 443.45           | 2,153.54          |
| 245                          | 1,685.09         | 1,486.85         | 1,669.73         | 1,390.18         | 6,231.86          |
| 246                          | 2,043.33         | 1,803.56         | 1,964.78         | 1,664.21         | 7,475.87          |
| <b>VA - VIRGINIA - Total</b> | <b>50,351.99</b> | <b>45,915.13</b> | <b>45,132.92</b> | <b>43,161.77</b> | <b>184,561.82</b> |

**STATE: VI - VIRGIN ISLANDS**

| REGISTRANT ZIP CODE 3              | 1ST QUARTER   | 2ND QUARTER   | 3RD QUARTER   | 4TH QUARTER   | TOTAL GRAMS     |
|------------------------------------|---------------|---------------|---------------|---------------|-----------------|
| 008                                | 634.30        | 834.39        | 457.64        | 852.07        | 2,778.39        |
| <b>VI - VIRGIN ISLANDS - Total</b> | <b>634.30</b> | <b>834.39</b> | <b>457.64</b> | <b>852.07</b> | <b>2,778.39</b> |

**STATE: VT - VERMONT**

| REGISTRANT ZIP CODE 3       | 1ST QUARTER     | 2ND QUARTER     | 3RD QUARTER     | 4TH QUARTER     | TOTAL GRAMS      |
|-----------------------------|-----------------|-----------------|-----------------|-----------------|------------------|
| 050                         | 179.58          | 296.26          | 188.69          | 219.30          | 883.83           |
| 051                         | 60.04           | 106.81          | 103.87          | 55.43           | 326.16           |
| 052                         | 153.41          | 214.00          | 148.44          | 142.17          | 658.03           |
| 053                         | 133.52          | 132.32          | 97.79           | 192.08          | 555.71           |
| 054                         | 1,074.57        | 1,053.94        | 1,071.62        | 1,103.10        | 4,303.23         |
| 056                         | 473.85          | 408.45          | 435.73          | 409.20          | 1,727.23         |
| 057                         | 365.58          | 366.12          | 393.93          | 292.83          | 1,418.46         |
| 058                         | 262.96          | 268.88          | 251.19          | 231.29          | 1,014.32         |
| <b>VT - VERMONT - Total</b> | <b>2,703.50</b> | <b>2,846.79</b> | <b>2,691.26</b> | <b>2,645.41</b> | <b>10,886.96</b> |

**STATE: WA - WASHINGTON**

| REGISTRANT ZIP CODE 3 | 1ST QUARTER | 2ND QUARTER | 3RD QUARTER | 4TH QUARTER | TOTAL GRAMS |
|-----------------------|-------------|-------------|-------------|-------------|-------------|
| 980                   | 9,946.97    | 10,066.06   | 9,929.70    | 8,769.90    | 38,712.62   |

|                                |                  |                  |                  |                  |                   |
|--------------------------------|------------------|------------------|------------------|------------------|-------------------|
| 981                            | 6,688.91         | 5,911.59         | 6,064.47         | 5,938.80         | 24,603.76         |
| 982                            | 7,716.62         | 7,502.21         | 7,029.81         | 6,565.89         | 28,814.53         |
| 983                            | 5,951.15         | 5,495.09         | 5,615.39         | 5,285.13         | 22,346.76         |
| 984                            | 4,034.34         | 4,017.66         | 3,639.32         | 3,527.76         | 15,219.09         |
| 985                            | 3,808.33         | 3,420.26         | 3,583.40         | 3,398.43         | 14,210.41         |
| 986                            | 4,605.56         | 4,309.83         | 4,580.46         | 4,096.29         | 17,592.15         |
| 988                            | 1,703.11         | 1,262.91         | 1,593.02         | 1,457.32         | 6,016.35          |
| 989                            | 2,049.16         | 1,996.83         | 2,024.18         | 1,682.19         | 7,752.36          |
| 990                            | 1,093.06         | 1,077.02         | 982.92           | 989.75           | 4,142.76          |
| 991                            | 1,114.40         | 1,072.10         | 1,204.62         | 976.58           | 4,367.70          |
| 992                            | 5,459.19         | 5,146.61         | 4,819.44         | 4,611.26         | 20,036.50         |
| 993                            | 2,505.82         | 2,090.95         | 2,191.71         | 2,107.80         | 8,896.28          |
| 994                            | 516.79           | 548.10           | 543.68           | 505.01           | 2,113.58          |
| <b>WA - WASHINGTON - Total</b> | <b>57,193.39</b> | <b>53,917.21</b> | <b>53,802.13</b> | <b>49,912.10</b> | <b>214,824.84</b> |

**STATE: WI - WISCONSIN**

| REGISTRANT ZIP CODE 3         | 1ST QUARTER      | 2ND QUARTER      | 3RD QUARTER      | 4TH QUARTER      | TOTAL GRAMS       |
|-------------------------------|------------------|------------------|------------------|------------------|-------------------|
| 530                           | 4,596.31         | 4,320.35         | 4,152.32         | 4,209.23         | 17,278.21         |
| 531                           | 5,031.45         | 4,433.85         | 4,621.77         | 4,524.39         | 18,611.46         |
| 532                           | 8,848.97         | 8,615.87         | 9,245.08         | 8,813.02         | 35,522.95         |
| 534                           | 1,325.31         | 1,404.69         | 1,298.14         | 1,223.46         | 5,251.59          |
| 535                           | 3,790.56         | 3,953.66         | 3,422.20         | 3,527.04         | 14,693.46         |
| 537                           | 1,860.32         | 1,760.72         | 1,628.63         | 1,535.69         | 6,785.35          |
| 538                           | 556.39           | 328.32           | 427.45           | 409.40           | 1,721.56          |
| 539                           | 1,711.25         | 1,262.97         | 1,464.36         | 1,416.66         | 5,855.25          |
| 540                           | 688.04           | 663.31           | 800.95           | 731.48           | 2,883.79          |
| 541                           | 1,256.29         | 1,031.73         | 1,320.56         | 1,234.22         | 4,842.80          |
| 542                           | 964.08           | 833.67           | 968.95           | 910.35           | 3,677.05          |
| 543                           | 1,789.12         | 1,889.01         | 1,695.07         | 1,672.84         | 7,046.03          |
| 544                           | 2,932.30         | 2,677.96         | 2,758.82         | 2,466.05         | 10,835.13         |
| 545                           | 995.46           | 980.63           | 867.97           | 828.67           | 3,672.73          |
| 546                           | 1,211.83         | 1,050.19         | 1,053.36         | 1,021.92         | 4,337.31          |
| 547                           | 1,541.42         | 1,297.72         | 1,216.13         | 1,193.21         | 5,248.48          |
| 548                           | 1,435.74         | 1,655.70         | 1,498.25         | 1,402.65         | 5,992.33          |
| 549                           | 3,754.14         | 3,588.52         | 3,357.82         | 3,205.74         | 13,906.22         |
| <b>WI - WISCONSIN - Total</b> | <b>44,288.96</b> | <b>41,748.88</b> | <b>41,797.83</b> | <b>40,326.02</b> | <b>168,161.69</b> |

**STATE: WV - WEST VIRGINIA**

| REGISTRANT ZIP CODE 3 | 1ST QUARTER | 2ND QUARTER | 3RD QUARTER | 4TH QUARTER | TOTAL GRAMS |
|-----------------------|-------------|-------------|-------------|-------------|-------------|
| 247                   | 1,109.45    | 1,214.13    | 1,039.11    | 854.57      | 4,217.25    |
| 248                   | 3,121.69    | 4,203.79    | 3,660.02    | 3,788.11    | 14,773.61   |
| 249                   | 464.93      | 326.76      | 430.63      | 357.52      | 1,579.83    |

|                                   |                  |                  |                  |                  |                   |
|-----------------------------------|------------------|------------------|------------------|------------------|-------------------|
| 250                               | 1,333.37         | 1,280.91         | 1,421.77         | 1,476.42         | 5,512.47          |
| 251                               | 882.88           | 982.49           | 1,191.24         | 1,316.11         | 4,372.72          |
| 252                               | 1,356.76         | 1,077.63         | 1,222.19         | 1,248.71         | 4,905.28          |
| 253                               | 2,086.15         | 2,047.32         | 2,351.59         | 2,071.39         | 8,556.44          |
| 254                               | 1,306.66         | 1,054.27         | 1,221.25         | 1,044.17         | 4,626.35          |
| 255                               | 2,173.00         | 2,285.92         | 2,287.45         | 2,845.97         | 9,592.35          |
| 256                               | 5,645.70         | 6,623.67         | 6,610.77         | 6,922.03         | 25,802.18         |
| 257                               | 1,183.34         | 1,199.70         | 1,163.42         | 1,135.72         | 4,682.18          |
| 258                               | 2,075.04         | 2,348.95         | 2,172.23         | 2,142.48         | 8,738.70          |
| 259                               | 731.53           | 745.35           | 683.47           | 727.49           | 2,887.83          |
| 260                               | 1,220.07         | 1,142.77         | 1,195.61         | 1,252.70         | 4,811.16          |
| 261                               | 1,531.31         | 1,197.20         | 1,422.81         | 1,254.49         | 5,405.81          |
| 262                               | 2,036.41         | 1,763.47         | 1,950.95         | 1,723.87         | 7,474.69          |
| 263                               | 1,244.50         | 1,227.06         | 1,193.44         | 1,064.98         | 4,729.99          |
| 264                               | 392.47           | 349.38           | 354.16           | 461.91           | 1,557.93          |
| 265                               | 2,973.46         | 2,975.49         | 2,699.54         | 2,949.90         | 11,598.40         |
| 266                               | 1,160.30         | 972.44           | 1,109.47         | 912.77           | 4,154.99          |
| 267                               | 503.72           | 536.65           | 547.16           | 620.36           | 2,207.89          |
| 268                               | 279.04           | 254.53           | 272.02           | 311.62           | 1,117.22          |
| <b>WV - WEST VIRGINIA - Total</b> | <b>34,811.79</b> | <b>35,809.87</b> | <b>36,200.31</b> | <b>36,483.29</b> | <b>143,305.26</b> |

**STATE: WY - WYOMING**

| REGISTRANT ZIP CODE 3       | 1ST QUARTER     | 2ND QUARTER     | 3RD QUARTER     | 4TH QUARTER     | TOTAL GRAMS      |
|-----------------------------|-----------------|-----------------|-----------------|-----------------|------------------|
| 820                         | 928.51          | 808.78          | 853.43          | 663.67          | 3,254.38         |
| 822                         | 200.01          | 119.35          | 133.71          | 161.52          | 614.59           |
| 823                         | 49.95           | 64.09           | 65.20           | 19.89           | 199.13           |
| 824                         | 574.58          | 496.78          | 492.83          | 497.82          | 2,062.00         |
| 825                         | 335.94          | 269.63          | 393.40          | 329.49          | 1,328.45         |
| 826                         | 556.67          | 552.43          | 560.72          | 557.13          | 2,226.94         |
| 827                         | 416.41          | 198.97          | 261.52          | 283.80          | 1,160.70         |
| 828                         | 240.85          | 225.38          | 297.59          | 234.77          | 998.58           |
| 829                         | 545.89          | 445.34          | 468.54          | 384.56          | 1,844.33         |
| 830                         | 130.37          | 106.08          | 119.71          | 13.26           | 369.43           |
| 831                         | 72.93           | 83.98           | 46.19           | 68.60           | 271.71           |
| <b>WY - WYOMING - Total</b> | <b>4,052.12</b> | <b>3,370.81</b> | <b>3,692.82</b> | <b>3,214.50</b> | <b>14,330.25</b> |

**DRUG: 9064 - BUPRENORPHINE****STATE: AK - ALASKA**

| REGISTRANT ZIP CODE 3 | 1ST QUARTER | 2ND QUARTER | 3RD QUARTER | 4TH QUARTER | TOTAL GRAMS |
|-----------------------|-------------|-------------|-------------|-------------|-------------|
| 995                   | 1,143.68    | 1,166.34    | 1,117.42    | 1,069.35    | 4,496.79    |
| 996                   | 726.47      | 740.25      | 736.86      | 749.49      | 2,953.06    |
| 997                   | 222.24      | 232.80      | 227.25      | 248.65      | 930.95      |

|                            |                 |                 |                 |                 |                  |
|----------------------------|-----------------|-----------------|-----------------|-----------------|------------------|
| 998                        | 301.39          | 329.81          | 363.65          | 379.86          | <b>1,374.70</b>  |
| 999                        | 190.06          | 201.08          | 198.54          | 219.21          | <b>808.89</b>    |
| <b>AK - ALASKA - Total</b> | <b>2,583.83</b> | <b>2,670.28</b> | <b>2,643.71</b> | <b>2,666.55</b> | <b>10,564.38</b> |

**STATE: AL - ALABAMA**

| REGISTRANT ZIP CODE 3       | 1ST QUARTER      | 2ND QUARTER      | 3RD QUARTER      | 4TH QUARTER      | TOTAL GRAMS       |
|-----------------------------|------------------|------------------|------------------|------------------|-------------------|
| 350                         | 3,985.66         | 4,270.03         | 4,267.57         | 4,486.84         | <b>17,010.10</b>  |
| 351                         | 2,265.30         | 2,288.28         | 2,348.97         | 2,461.58         | <b>9,364.13</b>   |
| 352                         | 3,461.53         | 3,498.53         | 3,591.37         | 3,483.22         | <b>14,034.65</b>  |
| 354                         | 463.89           | 477.45           | 484.11           | 531.11           | <b>1,956.56</b>   |
| 355                         | 1,910.56         | 2,109.76         | 2,356.77         | 2,553.53         | <b>8,930.62</b>   |
| 356                         | 2,967.22         | 3,081.98         | 3,113.78         | 3,267.76         | <b>12,430.75</b>  |
| 357                         | 920.19           | 975.84           | 1,050.16         | 1,096.03         | <b>4,042.22</b>   |
| 358                         | 1,234.79         | 1,278.58         | 1,325.02         | 1,365.01         | <b>5,203.40</b>   |
| 359                         | 2,617.81         | 3,062.87         | 3,166.36         | 3,269.82         | <b>12,116.86</b>  |
| 360                         | 626.49           | 661.83           | 693.48           | 721.98           | <b>2,703.78</b>   |
| 361                         | 351.08           | 387.31           | 386.34           | 427.90           | <b>1,552.63</b>   |
| 362                         | 999.74           | 1,067.01         | 1,142.82         | 1,139.31         | <b>4,348.88</b>   |
| 363                         | 745.87           | 827.04           | 826.02           | 855.26           | <b>3,254.20</b>   |
| 364                         | 391.55           | 387.12           | 389.88           | 391.98           | <b>1,560.54</b>   |
| 365                         | 1,854.00         | 1,934.67         | 1,988.99         | 2,043.57         | <b>7,821.23</b>   |
| 366                         | 1,298.41         | 1,443.12         | 1,422.50         | 1,564.06         | <b>5,728.09</b>   |
| 367                         | 245.96           | 266.41           | 239.39           | 257.93           | <b>1,009.69</b>   |
| 368                         | 546.91           | 613.30           | 622.77           | 659.33           | <b>2,442.32</b>   |
| 369                         | 31.29            | 29.31            | 36.04            | 40.86            | <b>137.50</b>     |
| <b>AL - ALABAMA - Total</b> | <b>26,918.25</b> | <b>28,660.45</b> | <b>29,452.35</b> | <b>30,617.09</b> | <b>115,648.15</b> |

**STATE: AR - ARKANSAS**

| REGISTRANT ZIP CODE 3 | 1ST QUARTER | 2ND QUARTER | 3RD QUARTER | 4TH QUARTER | TOTAL GRAMS     |
|-----------------------|-------------|-------------|-------------|-------------|-----------------|
| 716                   | 121.01      | 141.69      | 128.77      | 129.14      | <b>520.61</b>   |
| 717                   | 175.80      | 193.35      | 207.44      | 204.05      | <b>780.64</b>   |
| 718                   | 213.63      | 226.65      | 253.25      | 243.75      | <b>937.28</b>   |
| 719                   | 870.94      | 930.73      | 910.38      | 936.91      | <b>3,648.96</b> |
| 720                   | 683.91      | 713.88      | 711.27      | 695.02      | <b>2,804.08</b> |
| 721                   | 1,069.05    | 1,123.70    | 1,153.36    | 1,155.48    | <b>4,501.58</b> |
| 722                   | 696.71      | 764.04      | 820.24      | 899.74      | <b>3,180.72</b> |
| 723                   | 146.71      | 163.91      | 144.81      | 149.79      | <b>605.23</b>   |
| 724                   | 730.95      | 862.54      | 879.11      | 963.81      | <b>3,436.40</b> |
| 725                   | 217.85      | 263.62      | 274.90      | 305.42      | <b>1,061.79</b> |
| 726                   | 268.16      | 325.86      | 357.64      | 390.85      | <b>1,342.52</b> |
| 727                   | 837.53      | 938.33      | 1,008.71    | 1,018.40    | <b>3,802.97</b> |
| 728                   | 136.97      | 176.35      | 168.11      | 182.07      | <b>663.50</b>   |

|                              |                 |                 |                 |                 |                  |
|------------------------------|-----------------|-----------------|-----------------|-----------------|------------------|
| 729                          | 396.40          | 424.38          | 468.37          | 498.83          | 1,787.98         |
| <b>AR - ARKANSAS - Total</b> | <b>6,565.61</b> | <b>7,249.03</b> | <b>7,486.34</b> | <b>7,773.26</b> | <b>29,074.25</b> |

**STATE: AS - AMERICAN SAMOA**

| REGISTRANT ZIP CODE 3              | 1ST QUARTER | 2ND QUARTER | 3RD QUARTER | 4TH QUARTER | TOTAL GRAMS |
|------------------------------------|-------------|-------------|-------------|-------------|-------------|
| 967                                | 0.02        | 0.00        | 0.02        | 0           | 0.04        |
| <b>AS - AMERICAN SAMOA - Total</b> | <b>0.02</b> | <b>0.00</b> | <b>0.02</b> | <b>0.00</b> | <b>0.04</b> |

**STATE: AZ - ARIZONA**

| REGISTRANT ZIP CODE 3       | 1ST QUARTER      | 2ND QUARTER      | 3RD QUARTER      | 4TH QUARTER      | TOTAL GRAMS      |
|-----------------------------|------------------|------------------|------------------|------------------|------------------|
| 850                         | 2,501.98         | 2,763.59         | 2,996.39         | 3,235.63         | 11,497.60        |
| 851                         | 641.55           | 680.67           | 744.81           | 668.17           | 2,735.20         |
| 852                         | 2,739.25         | 2,847.19         | 3,002.00         | 3,189.57         | 11,778.02        |
| 853                         | 1,592.58         | 1,725.58         | 1,846.73         | 1,972.75         | 7,137.64         |
| 855                         | 108.98           | 132.63           | 147.27           | 169.33           | 558.20           |
| 856                         | 104.59           | 123.24           | 152.54           | 152.71           | 533.08           |
| 857                         | 1,354.48         | 1,503.43         | 1,543.78         | 1,774.78         | 6,176.47         |
| 859                         | 154.68           | 170.75           | 178.57           | 192.43           | 696.44           |
| 860                         | 111.38           | 117.42           | 144.13           | 147.29           | 520.22           |
| 863                         | 517.84           | 599.90           | 647.35           | 736.88           | 2,501.97         |
| 864                         | 162.47           | 194.70           | 203.37           | 269.56           | 830.10           |
| 865                         | 17.64            | 20.64            | 19.02            | 24.48            | 81.78            |
| <b>AZ - ARIZONA - Total</b> | <b>10,007.42</b> | <b>10,879.74</b> | <b>11,625.98</b> | <b>12,533.59</b> | <b>45,046.72</b> |

**STATE: CA - CALIFORNIA**

| REGISTRANT ZIP CODE 3 | 1ST QUARTER | 2ND QUARTER | 3RD QUARTER | 4TH QUARTER | TOTAL GRAMS |
|-----------------------|-------------|-------------|-------------|-------------|-------------|
| 900                   | 998.17      | 994.76      | 1,100.75    | 1,141.25    | 4,234.93    |
| 902                   | 836.30      | 841.03      | 859.06      | 956.93      | 3,493.32    |
| 903                   | 31.00       | 31.90       | 47.18       | 35.78       | 145.86      |
| 904                   | 222.05      | 240.93      | 233.91      | 216.45      | 913.34      |
| 905                   | 190.73      | 193.15      | 197.55      | 191.54      | 772.98      |
| 906                   | 294.77      | 281.98      | 314.30      | 277.33      | 1,168.38    |
| 907                   | 643.03      | 660.95      | 702.73      | 645.52      | 2,652.22    |
| 908                   | 328.72      | 343.95      | 334.71      | 345.88      | 1,353.26    |
| 910                   | 115.69      | 119.88      | 118.55      | 122.75      | 476.88      |
| 911                   | 178.43      | 191.70      | 168.10      | 181.03      | 719.27      |
| 912                   | 287.37      | 269.94      | 299.26      | 284.36      | 1,140.93    |
| 913                   | 1,186.72    | 1,275.76    | 1,352.25    | 1,330.66    | 5,145.39    |
| 914                   | 527.75      | 541.86      | 559.09      | 603.96      | 2,232.65    |
| 915                   | 214.47      | 216.51      | 220.97      | 207.72      | 859.68      |
| 916                   | 131.43      | 128.88      | 138.84      | 159.38      | 558.53      |
| 917                   | 871.79      | 858.73      | 919.88      | 896.17      | 3,546.57    |
| 918                   | 23.08       | 5.98        | 6.11        | 8.36        | 43.53       |

ARCOS 3 - REPORT 01 by GRAMS  
RETAIL DRUG DISTRIBUTION BY ZIP CODE WITHIN STATE

|     |          |          |          |          |                  |
|-----|----------|----------|----------|----------|------------------|
| 919 | 243.83   | 246.60   | 260.29   | 293.85   | <b>1,044.57</b>  |
| 920 | 1,441.73 | 1,483.74 | 1,632.20 | 1,627.79 | <b>6,185.47</b>  |
| 921 | 1,195.82 | 1,228.16 | 1,273.62 | 1,338.97 | <b>5,036.56</b>  |
| 922 | 388.70   | 416.42   | 417.17   | 521.02   | <b>1,743.31</b>  |
| 923 | 451.17   | 498.92   | 526.90   | 598.68   | <b>2,075.66</b>  |
| 924 | 55.08    | 65.95    | 60.74    | 66.45    | <b>248.23</b>    |
| 925 | 1,401.21 | 1,452.01 | 1,622.48 | 1,636.94 | <b>6,112.65</b>  |
| 926 | 1,791.38 | 1,869.50 | 1,892.81 | 1,976.94 | <b>7,530.64</b>  |
| 927 | 335.87   | 344.12   | 333.22   | 352.54   | <b>1,365.75</b>  |
| 928 | 822.93   | 866.70   | 880.57   | 865.49   | <b>3,435.69</b>  |
| 930 | 668.32   | 658.11   | 704.80   | 678.25   | <b>2,709.49</b>  |
| 931 | 453.73   | 476.23   | 500.97   | 560.83   | <b>1,991.76</b>  |
| 932 | 398.37   | 412.13   | 431.07   | 466.73   | <b>1,708.30</b>  |
| 933 | 282.53   | 264.46   | 285.68   | 275.07   | <b>1,107.73</b>  |
| 934 | 874.69   | 961.72   | 920.04   | 828.95   | <b>3,585.40</b>  |
| 935 | 482.96   | 523.19   | 507.78   | 523.88   | <b>2,037.81</b>  |
| 936 | 180.26   | 176.65   | 191.96   | 200.20   | <b>749.07</b>    |
| 937 | 299.63   | 322.71   | 333.79   | 357.59   | <b>1,313.72</b>  |
| 939 | 686.97   | 713.97   | 742.98   | 784.63   | <b>2,928.56</b>  |
| 940 | 677.37   | 726.59   | 774.24   | 827.16   | <b>3,005.36</b>  |
| 941 | 1,205.09 | 1,363.64 | 1,306.13 | 1,465.62 | <b>5,340.48</b>  |
| 943 | 115.04   | 119.87   | 122.34   | 150.23   | <b>507.48</b>    |
| 944 | 145.74   | 153.13   | 184.93   | 192.66   | <b>676.45</b>    |
| 945 | 2,766.32 | 2,903.85 | 3,157.50 | 3,353.07 | <b>12,180.75</b> |
| 946 | 403.86   | 462.36   | 533.23   | 587.77   | <b>1,987.23</b>  |
| 947 | 115.99   | 137.52   | 129.92   | 133.39   | <b>516.82</b>    |
| 948 | 125.92   | 137.70   | 143.44   | 176.92   | <b>583.98</b>    |
| 949 | 901.07   | 919.80   | 955.99   | 980.00   | <b>3,756.86</b>  |
| 950 | 1,080.50 | 1,129.00 | 1,188.56 | 1,299.94 | <b>4,698.00</b>  |
| 951 | 666.10   | 685.01   | 738.62   | 813.17   | <b>2,902.89</b>  |
| 952 | 360.56   | 364.97   | 355.38   | 375.96   | <b>1,456.87</b>  |
| 953 | 1,074.31 | 1,132.12 | 1,195.87 | 1,299.49 | <b>4,701.78</b>  |
| 954 | 2,272.76 | 2,333.19 | 2,494.17 | 2,559.53 | <b>9,659.65</b>  |
| 955 | 1,370.63 | 1,484.58 | 1,576.59 | 1,642.22 | <b>6,074.02</b>  |
| 956 | 2,273.00 | 2,377.76 | 2,571.36 | 2,651.32 | <b>9,873.44</b>  |
| 957 | 301.73   | 308.39   | 313.01   | 326.66   | <b>1,249.79</b>  |
| 958 | 2,154.44 | 2,174.50 | 2,295.19 | 2,468.78 | <b>9,092.91</b>  |
| 959 | 1,411.80 | 1,490.64 | 1,585.44 | 1,799.17 | <b>6,287.05</b>  |
| 960 | 1,023.18 | 1,090.88 | 1,080.34 | 1,174.66 | <b>4,369.06</b>  |
| 961 | 151.22   | 167.88   | 171.53   | 220.34   | <b>710.97</b>    |

|                                |                  |                  |                  |                  |                   |
|--------------------------------|------------------|------------------|------------------|------------------|-------------------|
| <b>CA - CALIFORNIA - Total</b> | <b>40,133.32</b> | <b>41,842.59</b> | <b>43,966.11</b> | <b>46,057.94</b> | <b>171,999.96</b> |
|--------------------------------|------------------|------------------|------------------|------------------|-------------------|

**STATE: CO - COLORADO**

| REGISTRANT ZIP CODE 3        | 1ST QUARTER     | 2ND QUARTER     | 3RD QUARTER     | 4TH QUARTER     | TOTAL GRAMS      |
|------------------------------|-----------------|-----------------|-----------------|-----------------|------------------|
| 800                          | 1,266.45        | 1,357.17        | 1,483.34        | 1,649.21        | 5,756.16         |
| 801                          | 815.65          | 819.89          | 850.25          | 879.82          | 3,365.61         |
| 802                          | 1,853.48        | 1,888.37        | 1,902.09        | 2,092.20        | 7,736.13         |
| 803                          | 130.62          | 124.80          | 139.86          | 142.55          | 537.83           |
| 804                          | 147.16          | 152.27          | 150.47          | 165.99          | 615.90           |
| 805                          | 1,014.77        | 1,099.97        | 1,207.23        | 1,314.85        | 4,636.83         |
| 806                          | 509.19          | 527.63          | 558.07          | 594.82          | 2,189.71         |
| 807                          | 58.40           | 55.95           | 53.09           | 57.04           | 224.49           |
| 808                          | 108.08          | 111.50          | 117.53          | 110.03          | 447.15           |
| 809                          | 864.35          | 985.92          | 1,018.05        | 1,087.92        | 3,956.24         |
| 810                          | 567.76          | 638.52          | 657.26          | 762.02          | 2,625.56         |
| 811                          | 80.89           | 78.28           | 87.29           | 98.11           | 344.56           |
| 812                          | 128.10          | 127.89          | 147.89          | 156.92          | 560.80           |
| 813                          | 134.23          | 127.91          | 139.01          | 185.20          | 586.35           |
| 814                          | 57.06           | 54.48           | 50.62           | 65.05           | 227.21           |
| 815                          | 180.71          | 242.69          | 206.93          | 227.69          | 858.02           |
| 816                          | 118.17          | 122.62          | 148.11          | 145.80          | 534.70           |
| <b>CO - COLORADO - Total</b> | <b>8,035.07</b> | <b>8,515.86</b> | <b>8,917.11</b> | <b>9,735.21</b> | <b>35,203.25</b> |

**STATE: CT - CONNECTICUT**

| REGISTRANT ZIP CODE 3           | 1ST QUARTER      | 2ND QUARTER      | 3RD QUARTER      | 4TH QUARTER      | TOTAL GRAMS      |
|---------------------------------|------------------|------------------|------------------|------------------|------------------|
| 060                             | 3,261.83         | 3,289.13         | 3,305.60         | 3,450.14         | 13,306.70        |
| 061                             | 1,498.61         | 1,549.74         | 1,583.20         | 1,677.51         | 6,309.05         |
| 062                             | 788.04           | 832.54           | 835.15           | 887.13           | 3,342.85         |
| 063                             | 1,468.05         | 1,599.35         | 1,624.98         | 1,840.89         | 6,533.28         |
| 064                             | 3,691.24         | 3,837.94         | 3,703.45         | 4,025.59         | 15,258.21        |
| 065                             | 2,146.69         | 2,316.21         | 2,191.33         | 2,239.29         | 8,893.52         |
| 066                             | 284.39           | 315.81           | 324.29           | 378.77           | 1,303.26         |
| 067                             | 1,496.79         | 1,592.47         | 1,597.59         | 1,770.14         | 6,456.99         |
| 068                             | 694.01           | 747.03           | 709.80           | 766.23           | 2,917.07         |
| 069                             | 180.27           | 198.24           | 195.20           | 193.53           | 767.24           |
| <b>CT - CONNECTICUT - Total</b> | <b>15,509.93</b> | <b>16,278.45</b> | <b>16,070.59</b> | <b>17,229.21</b> | <b>65,088.17</b> |

**STATE: DC - DISTRICT OF COLUMBIA**

| REGISTRANT ZIP CODE 3              | 1ST QUARTER     | 2ND QUARTER     | 3RD QUARTER     | 4TH QUARTER     | TOTAL GRAMS      |
|------------------------------------|-----------------|-----------------|-----------------|-----------------|------------------|
| 200                                | 2,719.42        | 2,715.84        | 2,816.64        | 3,231.05        | 11,482.96        |
| 204                                | 31.92           | 14.88           | 31.60           | 27.96           | 106.36           |
| <b>DC - DISTRICT OF COLUMBIA -</b> | <b>2,751.34</b> | <b>2,730.72</b> | <b>2,848.24</b> | <b>3,259.01</b> | <b>11,589.32</b> |

**STATE: DE - DELAWARE**



| REGISTRANT ZIP CODE 3        | 1ST QUARTER     | 2ND QUARTER     | 3RD QUARTER     | 4TH QUARTER     | TOTAL GRAMS      |
|------------------------------|-----------------|-----------------|-----------------|-----------------|------------------|
| 197                          | 1,073.25        | 1,165.75        | 1,109.59        | 1,169.58        | 4,518.17         |
| 198                          | 987.88          | 1,054.75        | 1,024.89        | 1,056.55        | 4,124.06         |
| 199                          | 1,690.21        | 1,842.89        | 1,832.83        | 1,897.44        | 7,263.37         |
| <b>DE - DELAWARE - Total</b> | <b>3,751.34</b> | <b>4,063.38</b> | <b>3,967.31</b> | <b>4,123.57</b> | <b>15,905.60</b> |

**STATE: FL - FLORIDA**

| REGISTRANT ZIP CODE 3       | 1ST QUARTER      | 2ND QUARTER      | 3RD QUARTER      | 4TH QUARTER      | TOTAL GRAMS       |
|-----------------------------|------------------|------------------|------------------|------------------|-------------------|
| 320                         | 3,083.10         | 3,176.99         | 3,236.22         | 3,245.76         | 12,742.08         |
| 321                         | 2,323.34         | 2,490.04         | 2,637.47         | 2,867.37         | 10,318.24         |
| 322                         | 3,764.56         | 4,110.90         | 4,260.25         | 4,454.43         | 16,590.15         |
| 323                         | 704.91           | 712.08           | 651.88           | 723.59           | 2,792.46          |
| 324                         | 900.91           | 1,011.24         | 1,026.82         | 996.66           | 3,935.63          |
| 325                         | 2,135.14         | 2,403.81         | 2,475.08         | 2,494.39         | 9,508.43          |
| 326                         | 2,606.10         | 2,834.44         | 3,085.25         | 3,078.10         | 11,603.88         |
| 327                         | 2,638.74         | 2,802.32         | 2,729.55         | 2,785.45         | 10,956.05         |
| 328                         | 1,133.08         | 1,212.37         | 1,279.23         | 1,331.69         | 4,956.38          |
| 329                         | 2,908.70         | 3,079.80         | 3,150.77         | 3,313.62         | 12,452.89         |
| 330                         | 1,590.00         | 1,602.53         | 1,682.70         | 1,678.78         | 6,554.01          |
| 331                         | 835.69           | 881.40           | 859.22           | 902.00           | 3,478.31          |
| 333                         | 1,246.12         | 1,249.67         | 1,391.97         | 1,368.51         | 5,256.27          |
| 334                         | 3,807.47         | 3,939.72         | 4,072.17         | 4,207.22         | 16,026.58         |
| 335                         | 1,477.09         | 1,497.48         | 1,485.55         | 1,556.93         | 6,017.05          |
| 336                         | 1,462.87         | 1,445.53         | 1,455.84         | 1,546.93         | 5,911.18          |
| 337                         | 2,332.21         | 2,497.49         | 2,551.32         | 2,654.33         | 10,035.35         |
| 338                         | 965.79           | 1,020.30         | 1,052.46         | 1,098.64         | 4,137.19          |
| 339                         | 2,653.07         | 2,601.90         | 2,601.22         | 2,742.62         | 10,598.81         |
| 341                         | 971.47           | 1,034.43         | 1,086.98         | 1,191.27         | 4,284.14          |
| 342                         | 3,534.46         | 3,687.54         | 3,615.47         | 3,851.66         | 14,689.13         |
| 344                         | 1,384.29         | 1,510.79         | 1,510.38         | 1,574.32         | 5,979.78          |
| 346                         | 1,988.83         | 2,130.79         | 2,145.41         | 2,279.69         | 8,544.72          |
| 347                         | 1,085.53         | 1,111.71         | 1,150.50         | 1,254.75         | 4,602.50          |
| 349                         | 1,468.92         | 1,544.17         | 1,548.01         | 1,585.78         | 6,146.88          |
| <b>FL - FLORIDA - Total</b> | <b>49,002.40</b> | <b>51,589.45</b> | <b>52,741.76</b> | <b>54,784.49</b> | <b>208,118.09</b> |

**STATE: GA - GEORGIA**

| REGISTRANT ZIP CODE 3 | 1ST QUARTER | 2ND QUARTER | 3RD QUARTER | 4TH QUARTER | TOTAL GRAMS |
|-----------------------|-------------|-------------|-------------|-------------|-------------|
| 300                   | 2,455.21    | 2,504.83    | 2,481.27    | 2,611.36    | 10,052.67   |
| 301                   | 2,242.72    | 2,258.58    | 2,335.48    | 2,436.06    | 9,272.84    |
| 302                   | 1,438.70    | 1,521.14    | 1,526.06    | 1,587.75    | 6,073.65    |
| 303                   | 629.83      | 701.09      | 687.51      | 759.70      | 2,778.13    |
| 304                   | 746.52      | 736.60      | 766.86      | 749.97      | 2,999.95    |

|                             |                  |                  |                  |                  |                  |
|-----------------------------|------------------|------------------|------------------|------------------|------------------|
| 305                         | 930.19           | 999.20           | 1,006.52         | 1,085.47         | 4,021.38         |
| 306                         | 837.25           | 933.20           | 953.31           | 985.92           | 3,709.68         |
| 307                         | 565.53           | 666.46           | 865.47           | 1,143.79         | 3,241.25         |
| 308                         | 107.22           | 117.55           | 120.19           | 130.30           | 475.26           |
| 309                         | 350.14           | 345.47           | 383.00           | 397.66           | 1,476.27         |
| 310                         | 1,112.49         | 1,147.32         | 1,055.15         | 1,119.93         | 4,434.89         |
| 312                         | 388.89           | 430.43           | 468.97           | 468.16           | 1,756.45         |
| 313                         | 715.64           | 796.18           | 813.19           | 764.95           | 3,089.96         |
| 314                         | 837.01           | 844.92           | 826.56           | 861.85           | 3,370.35         |
| 315                         | 1,797.97         | 2,005.00         | 2,065.33         | 2,139.88         | 8,008.18         |
| 316                         | 156.44           | 188.20           | 196.46           | 192.47           | 733.56           |
| 317                         | 449.39           | 533.35           | 509.48           | 546.56           | 2,038.78         |
| 318                         | 18.67            | 19.87            | 14.60            | 11.99            | 65.14            |
| 319                         | 288.58           | 276.78           | 269.59           | 295.48           | 1,130.44         |
| 398                         | 80.67            | 95.35            | 111.55           | 133.50           | 421.07           |
| <b>GA - GEORGIA - Total</b> | <b>16,149.07</b> | <b>17,121.52</b> | <b>17,456.56</b> | <b>18,422.76</b> | <b>69,149.91</b> |

**STATE: GU - GUAM**

| REGISTRANT ZIP CODE 3    | 1ST QUARTER | 2ND QUARTER | 3RD QUARTER | 4TH QUARTER | TOTAL GRAMS |
|--------------------------|-------------|-------------|-------------|-------------|-------------|
| 969                      | 0.62        | 0.25        | 1.44        | 0.00        | 2.31        |
| <b>GU - GUAM - Total</b> | <b>0.62</b> | <b>0.25</b> | <b>1.44</b> | <b>0.00</b> | <b>2.31</b> |

**STATE: HI - HAWAII**

| REGISTRANT ZIP CODE 3      | 1ST QUARTER     | 2ND QUARTER     | 3RD QUARTER     | 4TH QUARTER     | TOTAL GRAMS     |
|----------------------------|-----------------|-----------------|-----------------|-----------------|-----------------|
| 967                        | 1,588.15        | 1,633.64        | 1,726.50        | 1,799.94        | 6,748.24        |
| 968                        | 452.97          | 448.42          | 454.78          | 490.10          | 1,846.26        |
| <b>HI - HAWAII - Total</b> | <b>2,041.12</b> | <b>2,082.06</b> | <b>2,181.28</b> | <b>2,290.04</b> | <b>8,594.50</b> |

**STATE: IA - IOWA**

| REGISTRANT ZIP CODE 3 | 1ST QUARTER | 2ND QUARTER | 3RD QUARTER | 4TH QUARTER | TOTAL GRAMS |
|-----------------------|-------------|-------------|-------------|-------------|-------------|
| 500                   | 90.85       | 91.21       | 96.60       | 102.13      | 380.79      |
| 501                   | 59.66       | 72.40       | 87.93       | 113.88      | 333.86      |
| 502                   | 77.93       | 79.12       | 92.80       | 90.26       | 340.11      |
| 503                   | 416.79      | 368.32      | 373.60      | 364.23      | 1,522.94    |
| 504                   | 169.93      | 184.06      | 194.23      | 211.46      | 759.68      |
| 505                   | 63.19       | 61.55       | 78.33       | 70.43       | 273.50      |
| 506                   | 16.43       | 33.23       | 41.35       | 50.33       | 141.34      |
| 507                   | 61.24       | 61.80       | 49.22       | 58.03       | 230.28      |
| 508                   | 4.46        | 9.03        | 7.04        | 6.52        | 27.05       |
| 510                   | 100.16      | 95.83       | 105.64      | 107.06      | 408.69      |
| 511                   | 140.70      | 161.52      | 169.56      | 182.58      | 654.36      |
| 512                   | 43.02       | 39.81       | 43.43       | 30.08       | 156.34      |
| 513                   | 20.30       | 22.67       | 33.73       | 37.96       | 114.66      |

|                          |                 |                 |                 |                 |                 |
|--------------------------|-----------------|-----------------|-----------------|-----------------|-----------------|
| 514                      | 11.42           | 18.15           | 18.96           | 15.50           | 64.03           |
| 515                      | 63.60           | 72.49           | 74.86           | 74.73           | 285.69          |
| 516                      | 5.33            | 5.53            | 5.64            | 5.89            | 22.39           |
| 520                      | 61.61           | 59.96           | 64.40           | 61.01           | 246.99          |
| 521                      | 4.11            | 8.40            | 3.63            | 7.58            | 23.72           |
| 522                      | 122.03          | 152.04          | 154.41          | 178.50          | 606.97          |
| 523                      | 13.69           | 20.02           | 19.63           | 22.92           | 76.26           |
| 524                      | 54.14           | 72.41           | 89.69           | 93.34           | 309.57          |
| 525                      | 44.21           | 61.70           | 63.07           | 69.16           | 238.15          |
| 526                      | 47.45           | 50.75           | 51.56           | 66.86           | 216.62          |
| 527                      | 135.32          | 135.25          | 120.29          | 118.29          | 509.14          |
| 528                      | 80.12           | 73.31           | 78.41           | 85.30           | 317.13          |
| <b>IA - IOWA - Total</b> | <b>1,907.67</b> | <b>2,010.56</b> | <b>2,118.01</b> | <b>2,224.01</b> | <b>8,260.26</b> |

**STATE: ID - IDAHO**

| REGISTRANT ZIP CODE 3     | 1ST QUARTER     | 2ND QUARTER     | 3RD QUARTER     | 4TH QUARTER     | TOTAL GRAMS      |
|---------------------------|-----------------|-----------------|-----------------|-----------------|------------------|
| 832                       | 384.67          | 455.60          | 448.02          | 496.98          | 1,785.28         |
| 833                       | 245.94          | 254.46          | 287.68          | 327.49          | 1,115.57         |
| 834                       | 224.54          | 230.07          | 217.89          | 224.24          | 896.74           |
| 835                       | 373.66          | 417.49          | 422.95          | 431.56          | 1,645.65         |
| 836                       | 606.09          | 643.81          | 689.43          | 731.82          | 2,671.13         |
| 837                       | 635.63          | 653.50          | 658.64          | 693.01          | 2,640.77         |
| 838                       | 1,416.05        | 1,531.50        | 1,544.61        | 1,625.49        | 6,117.65         |
| <b>ID - IDAHO - Total</b> | <b>3,886.57</b> | <b>4,186.43</b> | <b>4,269.21</b> | <b>4,530.59</b> | <b>16,872.80</b> |

**STATE: IL - ILLINOIS**

| REGISTRANT ZIP CODE 3 | 1ST QUARTER | 2ND QUARTER | 3RD QUARTER | 4TH QUARTER | TOTAL GRAMS |
|-----------------------|-------------|-------------|-------------|-------------|-------------|
| 600                   | 2,319.84    | 2,453.08    | 2,430.04    | 2,563.14    | 9,766.10    |
| 601                   | 1,093.50    | 1,201.68    | 1,213.47    | 1,235.49    | 4,744.13    |
| 602                   | 25.33       | 28.90       | 30.44       | 35.84       | 120.51      |
| 603                   | 299.00      | 292.27      | 313.95      | 346.14      | 1,251.36    |
| 604                   | 2,047.05    | 2,066.62    | 2,027.61    | 2,156.90    | 8,298.18    |
| 605                   | 981.90      | 1,043.54    | 1,012.06    | 1,086.27    | 4,123.77    |
| 606                   | 1,930.76    | 2,063.06    | 2,094.26    | 2,377.31    | 8,465.40    |
| 607                   | 94.41       | 95.48       | 99.34       | 88.51       | 377.75      |
| 608                   | 64.30       | 60.86       | 70.55       | 72.55       | 268.26      |
| 609                   | 191.70      | 184.97      | 193.12      | 217.68      | 787.47      |
| 610                   | 208.80      | 222.21      | 216.16      | 232.46      | 879.64      |
| 611                   | 640.84      | 691.97      | 740.41      | 742.71      | 2,815.93    |
| 612                   | 198.75      | 208.98      | 194.80      | 200.21      | 802.74      |
| 613                   | 268.84      | 297.54      | 288.63      | 318.44      | 1,173.45    |
| 614                   | 70.79       | 80.47       | 94.01       | 112.93      | 358.20      |

|                              |                  |                  |                  |                  |                  |
|------------------------------|------------------|------------------|------------------|------------------|------------------|
| 615                          | 224.11           | 244.41           | 249.85           | 253.89           | 972.26           |
| 616                          | 399.39           | 429.12           | 461.29           | 483.56           | 1,773.36         |
| 617                          | 125.08           | 136.88           | 141.96           | 149.00           | 552.93           |
| 618                          | 857.67           | 931.07           | 928.72           | 920.51           | 3,637.97         |
| 619                          | 97.32            | 99.90            | 92.61            | 90.85            | 380.68           |
| 620                          | 372.12           | 405.52           | 403.37           | 411.75           | 1,592.76         |
| 622                          | 292.22           | 341.92           | 368.34           | 362.37           | 1,364.85         |
| 623                          | 152.83           | 203.47           | 237.91           | 259.19           | 853.40           |
| 624                          | 142.59           | 149.76           | 160.89           | 160.53           | 613.76           |
| 625                          | 345.61           | 362.39           | 355.80           | 381.74           | 1,445.55         |
| 626                          | 190.63           | 225.94           | 231.49           | 244.79           | 892.85           |
| 627                          | 362.62           | 365.81           | 374.07           | 401.60           | 1,504.11         |
| 628                          | 376.52           | 409.20           | 424.43           | 435.43           | 1,645.59         |
| 629                          | 1,225.46         | 1,317.31         | 1,379.41         | 1,464.97         | 5,387.15         |
| <b>IL - ILLINOIS - Total</b> | <b>15,599.99</b> | <b>16,614.32</b> | <b>16,829.01</b> | <b>17,806.76</b> | <b>66,850.09</b> |

**STATE: IN - INDIANA**

| REGISTRANT ZIP CODE 3       | 1ST QUARTER      | 2ND QUARTER      | 3RD QUARTER      | 4TH QUARTER      | TOTAL GRAMS      |
|-----------------------------|------------------|------------------|------------------|------------------|------------------|
| 460                         | 2,289.36         | 2,743.97         | 2,576.51         | 2,860.00         | 10,469.85        |
| 461                         | 2,194.94         | 2,144.68         | 2,590.53         | 2,728.15         | 9,658.29         |
| 462                         | 3,709.22         | 3,957.29         | 3,750.43         | 3,979.64         | 15,396.58        |
| 463                         | 2,137.01         | 2,316.60         | 2,256.04         | 2,382.98         | 9,092.63         |
| 464                         | 190.70           | 191.42           | 247.96           | 276.30           | 906.39           |
| 465                         | 647.27           | 703.35           | 742.81           | 870.74           | 2,964.18         |
| 466                         | 225.90           | 247.05           | 279.83           | 282.30           | 1,035.08         |
| 467                         | 196.50           | 228.71           | 231.65           | 276.36           | 933.22           |
| 468                         | 457.47           | 508.49           | 585.98           | 668.59           | 2,220.53         |
| 469                         | 805.54           | 952.32           | 1,075.17         | 1,159.87         | 3,992.89         |
| 470                         | 662.29           | 717.44           | 780.85           | 807.66           | 2,968.25         |
| 471                         | 1,864.24         | 2,050.61         | 2,174.28         | 2,333.54         | 8,422.66         |
| 472                         | 1,452.09         | 1,612.77         | 1,586.45         | 1,704.09         | 6,355.39         |
| 473                         | 1,748.59         | 1,911.09         | 2,100.36         | 2,248.57         | 8,008.61         |
| 474                         | 1,238.39         | 1,519.80         | 1,743.87         | 1,826.08         | 6,328.13         |
| 475                         | 215.92           | 300.39           | 373.79           | 446.82           | 1,336.92         |
| 476                         | 96.57            | 104.19           | 118.78           | 189.74           | 509.29           |
| 477                         | 559.98           | 691.61           | 717.27           | 868.69           | 2,837.55         |
| 478                         | 472.40           | 508.39           | 473.96           | 530.51           | 1,985.26         |
| 479                         | 471.10           | 501.67           | 571.83           | 640.74           | 2,185.34         |
| <b>IN - INDIANA - Total</b> | <b>21,635.49</b> | <b>23,911.83</b> | <b>24,978.36</b> | <b>27,081.35</b> | <b>97,607.04</b> |

**STATE: KS - KANSAS**

| REGISTRANT ZIP CODE 3 | 1ST QUARTER | 2ND QUARTER | 3RD QUARTER | 4TH QUARTER | TOTAL GRAMS |
|-----------------------|-------------|-------------|-------------|-------------|-------------|
|-----------------------|-------------|-------------|-------------|-------------|-------------|

|                            |                 |                 |                 |                 |                  |
|----------------------------|-----------------|-----------------|-----------------|-----------------|------------------|
| 660                        | 532.73          | 553.10          | 572.60          | 636.81          | 2,295.23         |
| 661                        | 129.64          | 152.68          | 180.92          | 206.05          | 669.29           |
| 662                        | 602.84          | 620.63          | 634.47          | 668.52          | 2,526.46         |
| 664                        | 31.26           | 37.73           | 42.23           | 35.70           | 146.92           |
| 665                        | 42.02           | 50.19           | 58.51           | 61.83           | 212.54           |
| 666                        | 115.34          | 135.22          | 128.19          | 128.34          | 507.09           |
| 667                        | 151.43          | 172.69          | 177.39          | 178.89          | 680.40           |
| 668                        | 18.69           | 13.35           | 15.08           | 12.70           | 59.83            |
| 669                        | 1.06            | 2.92            | 2.97            | 5.02            | 11.97            |
| 670                        | 85.93           | 92.58           | 89.51           | 99.08           | 367.10           |
| 671                        | 48.85           | 40.89           | 41.62           | 45.68           | 177.05           |
| 672                        | 486.78          | 521.15          | 511.05          | 541.86          | 2,060.84         |
| 673                        | 29.94           | 35.02           | 37.21           | 51.45           | 153.62           |
| 674                        | 107.62          | 161.53          | 150.66          | 166.03          | 585.85           |
| 675                        | 54.39           | 62.38           | 62.98           | 66.27           | 246.02           |
| 676                        | 47.52           | 66.96           | 60.18           | 63.17           | 237.84           |
| 677                        | 3.38            | 5.20            | 7.18            | 8.16            | 23.92            |
| 678                        | 60.20           | 56.93           | 57.97           | 62.32           | 237.42           |
| 679                        | 19.97           | 19.39           | 14.11           | 15.65           | 69.11            |
| <b>KS - KANSAS - Total</b> | <b>2,569.61</b> | <b>2,800.55</b> | <b>2,844.81</b> | <b>3,053.53</b> | <b>11,268.50</b> |

**STATE: KY - KENTUCKY**

| REGISTRANT ZIP CODE 3 | 1ST QUARTER | 2ND QUARTER | 3RD QUARTER | 4TH QUARTER | TOTAL GRAMS |
|-----------------------|-------------|-------------|-------------|-------------|-------------|
| 400                   | 681.85      | 704.02      | 706.54      | 735.60      | 2,828.01    |
| 401                   | 233.02      | 295.19      | 332.03      | 357.69      | 1,217.93    |
| 402                   | 2,844.59    | 2,955.71    | 2,909.81    | 3,170.53    | 11,880.63   |
| 403                   | 4,251.00    | 4,348.35    | 4,423.95    | 4,680.77    | 17,704.07   |
| 404                   | 2,325.78    | 2,037.40    | 2,191.43    | 2,317.08    | 8,871.69    |
| 405                   | 2,408.83    | 2,581.80    | 2,758.83    | 2,879.07    | 10,628.54   |
| 406                   | 555.82      | 580.33      | 575.88      | 633.02      | 2,345.05    |
| 407                   | 2,061.92    | 1,912.27    | 2,160.03    | 2,399.36    | 8,533.58    |
| 408                   | 381.74      | 392.10      | 515.30      | 575.49      | 1,864.63    |
| 409                   | 1,785.71    | 1,645.47    | 1,803.99    | 1,825.02    | 7,060.18    |
| 410                   | 2,042.46    | 2,248.09    | 2,162.87    | 2,288.05    | 8,741.47    |
| 411                   | 1,697.16    | 1,780.14    | 1,776.01    | 1,857.11    | 7,110.41    |
| 412                   | 1,130.41    | 1,190.26    | 1,361.36    | 1,430.34    | 5,112.38    |
| 413                   | 899.54      | 1,016.66    | 1,043.90    | 1,039.11    | 3,999.21    |
| 414                   | 767.33      | 506.64      | 663.34      | 669.83      | 2,607.14    |
| 415                   | 2,852.80    | 2,836.13    | 3,053.45    | 3,158.82    | 11,901.20   |
| 416                   | 1,957.51    | 2,027.86    | 1,950.21    | 1,970.59    | 7,906.16    |
| 417                   | 1,208.52    | 1,300.33    | 1,340.50    | 1,460.24    | 5,309.59    |

|                              |                  |                  |                  |                  |                   |
|------------------------------|------------------|------------------|------------------|------------------|-------------------|
| 418                          | 385.23           | 418.09           | 487.36           | 484.25           | 1,774.94          |
| 420                          | 1,260.68         | 1,357.72         | 1,302.28         | 1,462.14         | 5,382.83          |
| 421                          | 1,138.53         | 1,060.25         | 1,331.24         | 1,542.56         | 5,072.58          |
| 422                          | 258.68           | 298.95           | 346.58           | 385.69           | 1,289.89          |
| 423                          | 803.54           | 826.16           | 1,086.34         | 1,138.17         | 3,854.22          |
| 424                          | 426.06           | 536.73           | 503.54           | 531.33           | 1,997.66          |
| 425                          | 670.07           | 636.67           | 702.79           | 701.56           | 2,711.09          |
| 426                          | 786.96           | 752.18           | 839.15           | 773.80           | 3,152.08          |
| 427                          | 1,143.55         | 1,216.84         | 1,236.69         | 1,175.64         | 4,772.71          |
| <b>KY - KENTUCKY - Total</b> | <b>36,959.27</b> | <b>37,462.35</b> | <b>39,565.39</b> | <b>41,642.84</b> | <b>155,629.85</b> |

**STATE: LA - LOUISIANA**

| REGISTRANT ZIP CODE 3         | 1ST QUARTER      | 2ND QUARTER      | 3RD QUARTER      | 4TH QUARTER      | TOTAL GRAMS      |
|-------------------------------|------------------|------------------|------------------|------------------|------------------|
| 700                           | 3,905.04         | 4,005.09         | 4,080.66         | 4,027.25         | 16,018.04        |
| 701                           | 971.25           | 1,011.55         | 1,032.75         | 1,011.10         | 4,026.66         |
| 703                           | 1,057.94         | 1,117.80         | 1,155.03         | 1,152.35         | 4,483.11         |
| 704                           | 3,451.46         | 3,688.69         | 3,775.57         | 3,877.84         | 14,793.56        |
| 705                           | 2,487.95         | 2,730.54         | 2,646.47         | 2,755.39         | 10,620.35        |
| 706                           | 1,251.65         | 1,337.58         | 1,372.67         | 1,391.72         | 5,353.62         |
| 707                           | 1,716.89         | 1,859.70         | 1,792.66         | 1,823.70         | 7,192.94         |
| 708                           | 950.54           | 931.91           | 974.49           | 947.04           | 3,803.98         |
| 710                           | 275.61           | 296.42           | 309.20           | 290.07           | 1,171.31         |
| 711                           | 1,702.52         | 1,826.16         | 1,961.72         | 2,094.68         | 7,585.08         |
| 712                           | 1,181.10         | 1,229.08         | 1,341.01         | 1,413.16         | 5,164.34         |
| 713                           | 600.46           | 682.79           | 795.62           | 798.75           | 2,877.61         |
| 714                           | 358.56           | 388.55           | 379.17           | 409.60           | 1,535.88         |
| <b>LA - LOUISIANA - Total</b> | <b>19,910.96</b> | <b>21,105.86</b> | <b>21,617.02</b> | <b>21,992.64</b> | <b>84,626.49</b> |

**STATE: MA - MASSACHUSETTS**

| REGISTRANT ZIP CODE 3 | 1ST QUARTER | 2ND QUARTER | 3RD QUARTER | 4TH QUARTER | TOTAL GRAMS |
|-----------------------|-------------|-------------|-------------|-------------|-------------|
| 010                   | 3,588.74    | 3,641.86    | 3,613.30    | 3,713.77    | 14,557.67   |
| 011                   | 1,325.40    | 1,346.09    | 1,359.70    | 1,355.21    | 5,386.39    |
| 012                   | 1,345.23    | 1,389.58    | 1,407.26    | 1,525.50    | 5,667.57    |
| 013                   | 958.71      | 1,023.16    | 1,019.22    | 1,055.34    | 4,056.42    |
| 014                   | 1,135.97    | 1,189.10    | 1,167.74    | 1,275.02    | 4,767.83    |
| 015                   | 1,450.17    | 1,601.60    | 1,514.25    | 1,672.42    | 6,238.44    |
| 016                   | 2,110.08    | 2,192.21    | 2,097.44    | 2,224.38    | 8,624.11    |
| 017                   | 1,415.73    | 1,464.54    | 1,453.81    | 1,503.36    | 5,837.44    |
| 018                   | 3,415.46    | 3,609.51    | 3,494.61    | 3,816.88    | 14,336.45   |
| 019                   | 2,908.09    | 3,038.33    | 3,001.68    | 3,064.18    | 12,012.28   |
| 020                   | 1,638.26    | 1,706.04    | 1,669.35    | 1,783.44    | 6,797.09    |
| 021                   | 8,909.13    | 9,360.12    | 9,315.75    | 9,946.34    | 37,531.34   |

|                                   |                  |                  |                  |                  |                   |
|-----------------------------------|------------------|------------------|------------------|------------------|-------------------|
| 022                               | 91.79            | 117.52           | 114.11           | 131.08           | 454.51            |
| 023                               | 3,061.33         | 3,156.48         | 3,199.20         | 3,316.48         | 12,733.48         |
| 024                               | 978.92           | 1,061.43         | 1,022.00         | 1,063.08         | 4,125.43          |
| 025                               | 1,046.63         | 1,042.06         | 1,013.52         | 1,050.20         | 4,152.41          |
| 026                               | 1,388.95         | 1,397.91         | 1,392.05         | 1,529.33         | 5,708.24          |
| 027                               | 5,424.34         | 5,608.17         | 5,523.89         | 5,868.00         | 22,424.40         |
| <b>MA - MASSACHUSETTS - Total</b> | <b>42,192.92</b> | <b>43,945.72</b> | <b>43,378.87</b> | <b>45,894.00</b> | <b>175,411.51</b> |

**STATE: MD - MARYLAND**

| REGISTRANT ZIP CODE 3        | 1ST QUARTER      | 2ND QUARTER      | 3RD QUARTER      | 4TH QUARTER      | TOTAL GRAMS       |
|------------------------------|------------------|------------------|------------------|------------------|-------------------|
| 206                          | 1,750.67         | 1,890.31         | 1,990.22         | 2,138.51         | 7,769.71          |
| 207                          | 1,085.34         | 1,106.01         | 1,192.87         | 1,241.01         | 4,625.23          |
| 208                          | 931.84           | 997.63           | 977.19           | 1,042.64         | 3,949.30          |
| 209                          | 443.00           | 441.11           | 411.04           | 388.92           | 1,684.07          |
| 210                          | 3,478.29         | 3,703.15         | 3,724.23         | 4,016.44         | 14,922.12         |
| 211                          | 1,515.18         | 1,574.62         | 1,509.44         | 1,606.37         | 6,205.61          |
| 212                          | 11,191.52        | 11,697.17        | 11,837.29        | 12,292.56        | 47,018.54         |
| 214                          | 569.87           | 580.51           | 603.63           | 742.57           | 2,496.58          |
| 215                          | 1,266.76         | 1,354.66         | 1,479.12         | 1,560.39         | 5,660.93          |
| 216                          | 761.02           | 794.34           | 841.73           | 873.04           | 3,270.13          |
| 217                          | 2,177.15         | 2,306.95         | 2,449.43         | 2,582.58         | 9,516.10          |
| 218                          | 832.43           | 862.52           | 865.99           | 932.12           | 3,493.06          |
| 219                          | 1,319.09         | 1,320.20         | 1,303.66         | 1,429.17         | 5,372.12          |
| <b>MD - MARYLAND - Total</b> | <b>27,322.15</b> | <b>28,629.16</b> | <b>29,185.85</b> | <b>30,846.33</b> | <b>115,983.50</b> |

**STATE: ME - MAINE**

| REGISTRANT ZIP CODE 3     | 1ST QUARTER      | 2ND QUARTER      | 3RD QUARTER      | 4TH QUARTER      | TOTAL GRAMS      |
|---------------------------|------------------|------------------|------------------|------------------|------------------|
| 039                       | 65.60            | 71.95            | 79.86            | 82.64            | 300.05           |
| 040                       | 2,437.98         | 2,517.17         | 2,591.13         | 2,671.27         | 10,217.56        |
| 041                       | 988.86           | 1,036.95         | 1,125.02         | 1,157.32         | 4,308.15         |
| 042                       | 1,520.94         | 1,570.47         | 1,626.81         | 1,688.32         | 6,406.54         |
| 043                       | 838.40           | 853.45           | 906.42           | 977.97           | 3,576.23         |
| 044                       | 1,111.19         | 1,160.61         | 1,247.18         | 1,272.51         | 4,791.48         |
| 045                       | 365.94           | 385.09           | 392.03           | 424.65           | 1,567.71         |
| 046                       | 699.26           | 729.06           | 804.14           | 807.77           | 3,040.23         |
| 047                       | 430.46           | 461.59           | 417.57           | 436.01           | 1,745.64         |
| 048                       | 787.14           | 818.54           | 907.74           | 959.37           | 3,472.79         |
| 049                       | 1,203.25         | 1,307.35         | 1,429.70         | 1,512.01         | 5,452.32         |
| <b>ME - MAINE - Total</b> | <b>10,449.02</b> | <b>10,912.25</b> | <b>11,527.59</b> | <b>11,989.83</b> | <b>44,878.69</b> |

**STATE: MI - MICHIGAN**

| REGISTRANT ZIP CODE 3 | 1ST QUARTER | 2ND QUARTER | 3RD QUARTER | 4TH QUARTER | TOTAL GRAMS |
|-----------------------|-------------|-------------|-------------|-------------|-------------|
| 480                   | 4,259.79    | 4,347.06    | 4,385.69    | 4,285.07    | 17,277.61   |

|                              |                  |                  |                  |                  |                   |
|------------------------------|------------------|------------------|------------------|------------------|-------------------|
| 481                          | 7,923.85         | 8,250.86         | 8,255.75         | 8,764.95         | 33,195.41         |
| 482                          | 997.13           | 980.01           | 995.56           | 1,005.65         | 3,978.35          |
| 483                          | 3,103.39         | 3,236.34         | 3,162.82         | 3,266.90         | 12,769.45         |
| 484                          | 943.50           | 1,028.02         | 1,005.96         | 1,103.71         | 4,081.20          |
| 485                          | 620.01           | 708.06           | 749.81           | 784.99           | 2,862.87          |
| 486                          | 1,063.29         | 1,115.15         | 1,080.20         | 1,201.96         | 4,460.59          |
| 487                          | 654.86           | 721.39           | 677.18           | 729.62           | 2,783.06          |
| 488                          | 1,216.04         | 1,286.14         | 1,266.37         | 1,369.25         | 5,137.81          |
| 489                          | 210.12           | 211.24           | 218.24           | 262.82           | 902.42            |
| 490                          | 1,474.86         | 1,573.76         | 1,577.68         | 1,689.00         | 6,315.29          |
| 491                          | 101.85           | 109.00           | 106.04           | 105.26           | 422.14            |
| 492                          | 822.25           | 794.26           | 838.86           | 925.00           | 3,380.38          |
| 493                          | 407.00           | 408.66           | 413.61           | 453.34           | 1,682.61          |
| 494                          | 789.90           | 861.19           | 907.13           | 978.38           | 3,536.60          |
| 495                          | 1,018.05         | 1,060.89         | 1,039.07         | 1,083.23         | 4,201.22          |
| 496                          | 1,287.53         | 1,316.84         | 1,368.73         | 1,432.91         | 5,406.01          |
| 497                          | 1,183.78         | 1,320.60         | 1,301.39         | 1,449.96         | 5,255.72          |
| 498                          | 936.20           | 1,008.15         | 972.72           | 1,065.65         | 3,982.72          |
| 499                          | 118.97           | 125.78           | 142.33           | 137.78           | 524.86            |
| <b>MI - MICHIGAN - Total</b> | <b>29,132.39</b> | <b>30,463.40</b> | <b>30,465.10</b> | <b>32,095.43</b> | <b>122,156.32</b> |

**STATE: MN - MINNESOTA**

| REGISTRANT ZIP CODE 3         | 1ST QUARTER     | 2ND QUARTER     | 3RD QUARTER     | 4TH QUARTER     | TOTAL GRAMS      |
|-------------------------------|-----------------|-----------------|-----------------|-----------------|------------------|
| 550                           | 961.98          | 1,061.54        | 1,019.93        | 1,077.19        | 4,120.64         |
| 551                           | 1,517.16        | 1,631.55        | 1,573.88        | 1,719.82        | 6,442.40         |
| 553                           | 1,031.85        | 1,075.98        | 1,109.70        | 1,178.25        | 4,395.78         |
| 554                           | 2,119.90        | 2,262.37        | 2,304.70        | 2,543.18        | 9,230.15         |
| 556                           | 16.68           | 15.12           | 19.32           | 20.12           | 71.25            |
| 557                           | 210.46          | 241.00          | 259.47          | 280.21          | 991.14           |
| 558                           | 409.40          | 440.05          | 463.56          | 533.63          | 1,846.63         |
| 559                           | 247.59          | 258.67          | 280.06          | 259.51          | 1,045.83         |
| 560                           | 262.48          | 297.82          | 314.29          | 325.08          | 1,199.66         |
| 561                           | 13.35           | 14.11           | 10.49           | 13.14           | 51.09            |
| 562                           | 64.57           | 75.59           | 97.88           | 101.58          | 339.62           |
| 563                           | 356.32          | 382.37          | 467.25          | 481.14          | 1,687.08         |
| 564                           | 154.23          | 173.48          | 166.53          | 177.86          | 672.10           |
| 565                           | 319.78          | 357.10          | 389.66          | 429.42          | 1,495.96         |
| 566                           | 614.01          | 561.32          | 653.19          | 634.59          | 2,463.11         |
| 567                           | 45.74           | 28.95           | 40.46           | 45.30           | 160.45           |
| <b>MN - MINNESOTA - Total</b> | <b>8,345.50</b> | <b>8,877.01</b> | <b>9,170.37</b> | <b>9,820.01</b> | <b>36,212.90</b> |

**STATE: MO - MISSOURI**



| REGISTRANT ZIP CODE 3        | 1ST QUARTER      | 2ND QUARTER      | 3RD QUARTER      | 4TH QUARTER      | TOTAL GRAMS      |
|------------------------------|------------------|------------------|------------------|------------------|------------------|
| 630                          | 1,041.26         | 1,025.24         | 1,027.61         | 1,073.70         | 4,167.82         |
| 631                          | 2,023.83         | 2,295.97         | 2,639.42         | 2,887.31         | 9,846.54         |
| 633                          | 661.47           | 761.14           | 741.81           | 829.11           | 2,993.53         |
| 634                          | 84.59            | 111.57           | 159.58           | 170.21           | 525.96           |
| 635                          | 25.68            | 30.91            | 38.33            | 53.52            | 148.44           |
| 636                          | 675.62           | 701.82           | 659.89           | 713.62           | 2,750.95         |
| 637                          | 190.20           | 192.86           | 265.67           | 300.93           | 949.66           |
| 638                          | 230.55           | 246.44           | 258.76           | 274.42           | 1,010.16         |
| 639                          | 259.40           | 240.69           | 337.54           | 376.80           | 1,214.43         |
| 640                          | 768.54           | 817.07           | 827.80           | 841.51           | 3,254.93         |
| 641                          | 720.56           | 781.59           | 791.80           | 840.59           | 3,134.54         |
| 644                          | 61.70            | 70.15            | 65.33            | 64.65            | 261.83           |
| 645                          | 258.21           | 285.00           | 342.06           | 431.04           | 1,316.31         |
| 646                          | 28.24            | 31.11            | 38.87            | 44.29            | 142.51           |
| 647                          | 110.38           | 116.15           | 149.21           | 170.21           | 545.95           |
| 648                          | 294.77           | 338.96           | 383.57           | 482.31           | 1,499.60         |
| 650                          | 168.88           | 212.16           | 254.89           | 269.21           | 905.13           |
| 651                          | 137.58           | 139.30           | 156.63           | 164.09           | 597.61           |
| 652                          | 584.62           | 651.28           | 689.07           | 797.73           | 2,722.70         |
| 653                          | 176.66           | 207.38           | 261.07           | 294.06           | 939.17           |
| 654                          | 165.33           | 203.48           | 299.63           | 390.35           | 1,058.79         |
| 655                          | 232.74           | 288.07           | 330.93           | 394.52           | 1,246.25         |
| 656                          | 232.49           | 239.43           | 285.33           | 341.03           | 1,098.28         |
| 657                          | 488.30           | 583.04           | 704.26           | 733.64           | 2,509.24         |
| 658                          | 1,818.32         | 2,005.34         | 2,262.45         | 2,713.35         | 8,799.45         |
| <b>MO - MISSOURI - Total</b> | <b>11,439.92</b> | <b>12,576.15</b> | <b>13,971.52</b> | <b>15,652.20</b> | <b>53,639.78</b> |

**STATE: MS - MISSISSIPPI**

| REGISTRANT ZIP CODE 3 | 1ST QUARTER | 2ND QUARTER | 3RD QUARTER | 4TH QUARTER | TOTAL GRAMS |
|-----------------------|-------------|-------------|-------------|-------------|-------------|
| 386                   | 1,313.48    | 1,351.72    | 1,353.20    | 1,418.38    | 5,436.78    |
| 387                   | 92.87       | 105.07      | 100.43      | 121.03      | 419.40      |
| 388                   | 1,662.02    | 1,783.10    | 1,778.82    | 1,734.85    | 6,958.80    |
| 389                   | 133.07      | 154.70      | 166.75      | 159.74      | 614.26      |
| 390                   | 652.48      | 629.98      | 634.84      | 612.51      | 2,529.82    |
| 391                   | 671.13      | 670.55      | 684.53      | 682.45      | 2,708.65    |
| 392                   | 580.49      | 608.26      | 640.69      | 654.76      | 2,484.19    |
| 393                   | 472.30      | 540.68      | 539.36      | 539.33      | 2,091.67    |
| 394                   | 1,742.03    | 1,813.09    | 1,831.02    | 1,858.15    | 7,244.29    |
| 395                   | 2,530.24    | 2,614.26    | 2,602.81    | 2,670.98    | 10,418.28   |
| 396                   | 255.38      | 278.27      | 318.07      | 343.05      | 1,194.77    |

|                                 |                  |                  |                  |                  |                  |
|---------------------------------|------------------|------------------|------------------|------------------|------------------|
| 397                             | 164.66           | 169.71           | 190.06           | 235.36           | <b>759.78</b>    |
| <b>MS - MISSISSIPPI - Total</b> | <b>10,270.14</b> | <b>10,719.39</b> | <b>10,840.57</b> | <b>11,030.58</b> | <b>42,860.68</b> |

**STATE: MT - MONTANA**

| REGISTRANT ZIP CODE 3       | 1ST QUARTER     | 2ND QUARTER     | 3RD QUARTER     | 4TH QUARTER     | TOTAL GRAMS      |
|-----------------------------|-----------------|-----------------|-----------------|-----------------|------------------|
| 590                         | 104.44          | 107.59          | 102.00          | 122.44          | <b>436.47</b>    |
| 591                         | 338.29          | 326.90          | 320.34          | 347.58          | <b>1,333.12</b>  |
| 592                         | 101.82          | 136.08          | 151.76          | 156.46          | <b>546.12</b>    |
| 593                         | 44.00           | 43.05           | 41.59           | 48.76           | <b>177.39</b>    |
| 594                         | 733.41          | 703.68          | 710.31          | 738.09          | <b>2,885.48</b>  |
| 595                         | 33.65           | 40.68           | 55.36           | 62.48           | <b>192.18</b>    |
| 596                         | 290.51          | 300.83          | 329.86          | 338.58          | <b>1,259.78</b>  |
| 597                         | 289.36          | 273.75          | 310.69          | 332.38          | <b>1,206.18</b>  |
| 598                         | 653.58          | 690.69          | 754.59          | 820.08          | <b>2,918.95</b>  |
| 599                         | 266.82          | 267.63          | 297.56          | 372.02          | <b>1,204.04</b>  |
| <b>MT - MONTANA - Total</b> | <b>2,855.90</b> | <b>2,890.90</b> | <b>3,074.04</b> | <b>3,338.87</b> | <b>12,159.72</b> |

**STATE: NC - NORTH CAROLINA**

| REGISTRANT ZIP CODE 3              | 1ST QUARTER      | 2ND QUARTER      | 3RD QUARTER      | 4TH QUARTER      | TOTAL GRAMS       |
|------------------------------------|------------------|------------------|------------------|------------------|-------------------|
| 270                                | 659.11           | 674.24           | 756.53           | 872.03           | <b>2,961.92</b>   |
| 271                                | 707.78           | 717.11           | 739.22           | 815.77           | <b>2,979.89</b>   |
| 272                                | 1,477.24         | 1,631.91         | 1,700.54         | 1,899.93         | <b>6,709.62</b>   |
| 273                                | 1,084.92         | 1,157.89         | 1,214.39         | 1,299.82         | <b>4,757.02</b>   |
| 274                                | 737.83           | 798.21           | 722.96           | 834.16           | <b>3,093.16</b>   |
| 275                                | 2,283.15         | 2,459.71         | 2,535.92         | 2,745.11         | <b>10,023.89</b>  |
| 276                                | 1,158.14         | 1,205.48         | 1,156.12         | 1,329.42         | <b>4,849.16</b>   |
| 277                                | 1,527.62         | 1,605.49         | 1,670.01         | 1,826.83         | <b>6,629.95</b>   |
| 278                                | 1,268.43         | 2,099.66         | 1,465.83         | 1,554.38         | <b>6,388.30</b>   |
| 279                                | 459.68           | 482.68           | 525.91           | 517.45           | <b>1,985.72</b>   |
| 280                                | 3,072.84         | 3,246.95         | 3,207.46         | 3,549.50         | <b>13,076.75</b>  |
| 281                                | 2,202.56         | 2,371.93         | 2,500.85         | 2,944.46         | <b>10,019.80</b>  |
| 282                                | 1,981.65         | 1,964.95         | 1,939.20         | 2,189.82         | <b>8,075.62</b>   |
| 283                                | 3,127.25         | 4,161.13         | 3,441.04         | 3,472.99         | <b>14,202.42</b>  |
| 284                                | 3,425.65         | 3,593.96         | 3,594.37         | 4,409.54         | <b>15,023.52</b>  |
| 285                                | 1,245.39         | 1,458.46         | 1,542.57         | 1,655.40         | <b>5,901.81</b>   |
| 286                                | 4,881.59         | 5,208.04         | 5,876.44         | 6,295.94         | <b>22,262.01</b>  |
| 287                                | 2,547.29         | 2,668.41         | 2,783.76         | 3,155.24         | <b>11,154.71</b>  |
| 288                                | 2,045.87         | 2,141.26         | 2,177.53         | 2,589.75         | <b>8,954.42</b>   |
| 289                                | 209.10           | 240.08           | 246.43           | 279.58           | <b>975.19</b>     |
| <b>NC - NORTH CAROLINA - Total</b> | <b>36,103.10</b> | <b>39,887.55</b> | <b>39,797.09</b> | <b>44,237.14</b> | <b>160,024.88</b> |

**STATE: ND - NORTH DAKOTA**

| REGISTRANT ZIP CODE 3 | 1ST QUARTER | 2ND QUARTER | 3RD QUARTER | 4TH QUARTER | TOTAL GRAMS |
|-----------------------|-------------|-------------|-------------|-------------|-------------|
|-----------------------|-------------|-------------|-------------|-------------|-------------|

|                                  |                 |                 |                 |                 |                 |
|----------------------------------|-----------------|-----------------|-----------------|-----------------|-----------------|
| 580                              | 8.83            | 14.19           | 19.06           | 18.58           | 60.67           |
| 581                              | 276.28          | 273.60          | 291.18          | 289.49          | 1,130.55        |
| 582                              | 69.10           | 89.30           | 108.55          | 130.59          | 397.54          |
| 583                              | 73.53           | 101.08          | 105.41          | 123.09          | 403.12          |
| 584                              | 12.28           | 20.98           | 17.55           | 19.47           | 70.27           |
| 585                              | 415.28          | 427.36          | 448.84          | 419.25          | 1,710.73        |
| 586                              | 55.04           | 61.00           | 74.38           | 77.25           | 267.67          |
| 587                              | 33.94           | 47.00           | 61.99           | 72.70           | 215.63          |
| 588                              | 82.37           | 100.80          | 103.60          | 110.34          | 397.10          |
| <b>ND - NORTH DAKOTA - Total</b> | <b>1,026.66</b> | <b>1,135.30</b> | <b>1,230.55</b> | <b>1,260.77</b> | <b>4,653.28</b> |

**STATE: NE - NEBRASKA**

| REGISTRANT ZIP CODE 3        | 1ST QUARTER     | 2ND QUARTER     | 3RD QUARTER     | 4TH QUARTER     | TOTAL GRAMS     |
|------------------------------|-----------------|-----------------|-----------------|-----------------|-----------------|
| 680                          | 81.79           | 84.46           | 86.14           | 85.69           | 338.07          |
| 681                          | 563.86          | 586.79          | 579.75          | 642.03          | 2,372.43        |
| 683                          | 39.35           | 41.54           | 41.33           | 43.46           | 165.67          |
| 684                          | 21.09           | 27.31           | 29.89           | 32.76           | 111.06          |
| 685                          | 291.52          | 307.41          | 304.30          | 335.55          | 1,238.79        |
| 686                          | 30.61           | 35.34           | 37.87           | 36.24           | 140.06          |
| 687                          | 53.53           | 60.72           | 51.49           | 58.49           | 224.24          |
| 688                          | 114.70          | 83.03           | 88.71           | 96.76           | 383.20          |
| 689                          | 18.90           | 19.48           | 18.13           | 21.82           | 78.33           |
| 690                          | 3.74            | 3.73            | 2.73            | 2.42            | 12.63           |
| 691                          | 162.63          | 200.99          | 217.72          | 235.91          | 817.25          |
| 692                          | 3.74            | 4.34            | 4.76            | 7.19            | 20.03           |
| 693                          | 19.45           | 14.09           | 11.82           | 16.76           | 62.12           |
| <b>NE - NEBRASKA - Total</b> | <b>1,404.90</b> | <b>1,469.22</b> | <b>1,474.66</b> | <b>1,615.10</b> | <b>5,963.88</b> |

**STATE: NH - NEW HAMPSHIRE**

| REGISTRANT ZIP CODE 3             | 1ST QUARTER     | 2ND QUARTER     | 3RD QUARTER     | 4TH QUARTER     | TOTAL GRAMS      |
|-----------------------------------|-----------------|-----------------|-----------------|-----------------|------------------|
| 030                               | 1,296.16        | 1,414.11        | 1,331.67        | 1,488.24        | 5,530.18         |
| 031                               | 1,240.96        | 1,372.39        | 1,361.04        | 1,423.60        | 5,397.99         |
| 032                               | 1,288.02        | 1,367.90        | 1,426.61        | 1,513.20        | 5,595.74         |
| 033                               | 852.84          | 923.20          | 864.87          | 960.86          | 3,601.78         |
| 034                               | 338.90          | 350.93          | 324.80          | 370.93          | 1,385.56         |
| 035                               | 322.37          | 366.22          | 385.81          | 408.55          | 1,482.95         |
| 036                               | 11.67           | 11.61           | 12.94           | 13.57           | 49.79            |
| 037                               | 1,153.15        | 1,192.81        | 1,041.46        | 1,119.48        | 4,506.90         |
| 038                               | 1,715.99        | 1,826.86        | 1,804.82        | 1,946.95        | 7,294.62         |
| <b>NH - NEW HAMPSHIRE - Total</b> | <b>8,220.05</b> | <b>8,826.04</b> | <b>8,554.03</b> | <b>9,245.38</b> | <b>34,845.51</b> |

**STATE: NJ - NEW JERSEY**

| REGISTRANT ZIP CODE 3 | 1ST QUARTER | 2ND QUARTER | 3RD QUARTER | 4TH QUARTER | TOTAL GRAMS |
|-----------------------|-------------|-------------|-------------|-------------|-------------|
|-----------------------|-------------|-------------|-------------|-------------|-------------|

|                                |                  |                  |                  |                  |                   |
|--------------------------------|------------------|------------------|------------------|------------------|-------------------|
| 070                            | 2,863.03         | 2,994.05         | 2,861.52         | 2,981.89         | 11,700.48         |
| 071                            | 929.19           | 1,006.49         | 1,019.65         | 1,032.89         | 3,988.22          |
| 072                            | 237.10           | 254.17           | 254.41           | 250.58           | 996.25            |
| 073                            | 172.84           | 172.40           | 210.15           | 190.55           | 745.94            |
| 074                            | 1,057.80         | 1,134.99         | 1,097.56         | 1,150.82         | 4,441.18          |
| 075                            | 297.61           | 314.57           | 335.11           | 361.56           | 1,308.84          |
| 076                            | 849.19           | 914.81           | 911.69           | 936.22           | 3,611.91          |
| 077                            | 2,147.24         | 2,160.61         | 2,141.77         | 2,237.05         | 8,686.67          |
| 078                            | 844.54           | 924.30           | 831.86           | 996.21           | 3,596.91          |
| 079                            | 328.86           | 340.95           | 338.68           | 365.40           | 1,373.89          |
| 080                            | 6,903.86         | 7,339.67         | 7,095.11         | 7,698.66         | 29,037.30         |
| 081                            | 995.92           | 1,017.08         | 982.65           | 1,123.71         | 4,119.35          |
| 082                            | 1,851.77         | 1,925.32         | 1,893.68         | 2,005.78         | 7,676.55          |
| 083                            | 1,022.95         | 1,077.10         | 1,038.57         | 1,197.78         | 4,336.40          |
| 084                            | 264.48           | 283.85           | 263.42           | 285.88           | 1,097.63          |
| 085                            | 568.37           | 619.46           | 627.84           | 673.28           | 2,488.95          |
| 086                            | 735.08           | 787.82           | 777.44           | 834.66           | 3,135.00          |
| 087                            | 2,574.92         | 2,662.24         | 2,611.12         | 2,797.60         | 10,645.88         |
| 088                            | 1,709.41         | 1,816.56         | 1,820.91         | 1,992.53         | 7,339.40          |
| 089                            | 165.76           | 176.41           | 177.92           | 220.83           | 740.92            |
| <b>NJ - NEW JERSEY - Total</b> | <b>26,519.91</b> | <b>27,922.84</b> | <b>27,291.06</b> | <b>29,333.86</b> | <b>111,067.66</b> |

**STATE: NM - NEW MEXICO**

| REGISTRANT ZIP CODE 3          | 1ST QUARTER     | 2ND QUARTER     | 3RD QUARTER     | 4TH QUARTER     | TOTAL GRAMS      |
|--------------------------------|-----------------|-----------------|-----------------|-----------------|------------------|
| 870                            | 428.38          | 474.84          | 493.23          | 502.93          | 1,899.37         |
| 871                            | 3,781.72        | 4,027.27        | 4,145.25        | 4,202.21        | 16,156.46        |
| 873                            | 130.68          | 146.26          | 138.69          | 145.29          | 560.93           |
| 874                            | 315.14          | 323.06          | 353.53          | 319.53          | 1,311.26         |
| 875                            | 1,998.02        | 2,156.06        | 2,242.90        | 2,300.93        | 8,697.91         |
| 877                            | 201.57          | 210.39          | 230.81          | 236.59          | 879.37           |
| 878                            | 73.69           | 104.48          | 138.49          | 144.92          | 461.58           |
| 879                            | 11.76           | 12.66           | 19.92           | 16.50           | 60.84            |
| 880                            | 361.73          | 398.25          | 441.28          | 466.24          | 1,667.51         |
| 881                            | 33.16           | 31.87           | 41.00           | 32.36           | 138.39           |
| 882                            | 397.35          | 430.94          | 443.12          | 480.45          | 1,751.86         |
| 883                            | 137.59          | 144.21          | 164.45          | 135.20          | 581.46           |
| 884                            | 4.02            | 6.98            | 8.58            | 9.02            | 28.60            |
| <b>NM - NEW MEXICO - Total</b> | <b>7,874.81</b> | <b>8,467.29</b> | <b>8,861.26</b> | <b>8,992.19</b> | <b>34,195.54</b> |

**STATE: NV - NEVADA**

| REGISTRANT ZIP CODE 3 | 1ST QUARTER | 2ND QUARTER | 3RD QUARTER | 4TH QUARTER | TOTAL GRAMS |
|-----------------------|-------------|-------------|-------------|-------------|-------------|
| 890                   | 723.48      | 714.77      | 736.38      | 807.47      | 2,982.10    |

|                            |                 |                 |                 |                 |                  |
|----------------------------|-----------------|-----------------|-----------------|-----------------|------------------|
| 891                        | 1,702.79        | 1,747.14        | 1,853.89        | 1,940.84        | 7,244.66         |
| 893                        | 12.00           | 16.32           | 12.54           | 12.12           | 52.99            |
| 894                        | 332.56          | 413.20          | 415.09          | 435.84          | 1,596.68         |
| 895                        | 600.76          | 589.69          | 618.44          | 660.05          | 2,468.94         |
| 897                        | 125.34          | 141.64          | 144.77          | 169.09          | 580.84           |
| 898                        | 85.86           | 90.78           | 88.03           | 100.04          | 364.71           |
| <b>NV - NEVADA - Total</b> | <b>3,582.79</b> | <b>3,713.55</b> | <b>3,869.14</b> | <b>4,125.46</b> | <b>15,290.93</b> |

**STATE: NY - NEW YORK**

| REGISTRANT ZIP CODE 3 | 1ST QUARTER | 2ND QUARTER | 3RD QUARTER | 4TH QUARTER | TOTAL GRAMS |
|-----------------------|-------------|-------------|-------------|-------------|-------------|
| 100                   | 2,650.76    | 2,797.01    | 2,651.53    | 2,903.32    | 11,002.62   |
| 101                   | 66.79       | 83.77       | 93.87       | 105.73      | 350.17      |
| 102                   | 1.39        | 2.24        | 0.98        | 3.95        | 8.56        |
| 103                   | 1,838.50    | 1,878.79    | 1,913.82    | 1,940.77    | 7,571.88    |
| 104                   | 2,467.85    | 2,518.21    | 2,580.42    | 2,777.05    | 10,343.53   |
| 105                   | 1,077.49    | 1,069.98    | 1,137.71    | 1,181.78    | 4,466.96    |
| 106                   | 232.47      | 224.69      | 225.89      | 207.88      | 890.93      |
| 107                   | 360.74      | 389.72      | 401.68      | 416.92      | 1,569.05    |
| 108                   | 101.12      | 103.10      | 94.21       | 95.30       | 393.72      |
| 109                   | 1,474.58    | 1,565.67    | 1,567.65    | 1,643.01    | 6,250.91    |
| 110                   | 580.58      | 591.58      | 596.27      | 572.45      | 2,340.89    |
| 111                   | 348.17      | 398.38      | 416.88      | 435.40      | 1,598.83    |
| 112                   | 3,010.34    | 3,314.23    | 3,357.94    | 3,496.53    | 13,179.04   |
| 113                   | 1,050.75    | 1,063.83    | 1,050.51    | 1,134.40    | 4,299.49    |
| 114                   | 476.65      | 470.33      | 453.65      | 493.99      | 1,894.61    |
| 115                   | 1,446.02    | 1,514.40    | 1,570.18    | 1,676.58    | 6,207.19    |
| 116                   | 116.90      | 125.78      | 134.20      | 133.19      | 510.07      |
| 117                   | 5,951.47    | 6,178.61    | 6,037.25    | 6,455.19    | 24,622.51   |
| 118                   | 497.67      | 537.41      | 499.65      | 533.51      | 2,068.24    |
| 119                   | 1,138.03    | 1,213.28    | 1,225.25    | 1,259.93    | 4,836.50    |
| 120                   | 1,911.10    | 2,019.97    | 2,070.07    | 2,073.77    | 8,074.92    |
| 121                   | 920.15      | 1,006.79    | 1,048.80    | 1,088.46    | 4,064.20    |
| 122                   | 778.67      | 880.19      | 932.05      | 985.72      | 3,576.63    |
| 123                   | 709.26      | 762.94      | 784.01      | 842.81      | 3,099.03    |
| 124                   | 896.66      | 983.90      | 955.95      | 1,056.16    | 3,892.67    |
| 125                   | 1,591.55    | 1,627.39    | 1,680.32    | 1,778.66    | 6,677.93    |
| 126                   | 323.69      | 337.43      | 319.89      | 377.55      | 1,358.56    |
| 127                   | 887.30      | 895.52      | 866.09      | 968.39      | 3,617.30    |
| 128                   | 1,522.15    | 1,581.51    | 1,616.49    | 1,693.01    | 6,413.16    |
| 129                   | 1,381.63    | 1,405.52    | 1,507.47    | 1,582.48    | 5,877.11    |
| 130                   | 1,116.05    | 1,189.99    | 1,220.52    | 1,400.92    | 4,927.47    |

|                              |                  |                  |                  |                  |                   |
|------------------------------|------------------|------------------|------------------|------------------|-------------------|
| 131                          | 398.14           | 425.02           | 417.60           | 462.62           | <b>1,703.38</b>   |
| 132                          | 1,166.12         | 1,261.94         | 1,259.11         | 1,440.87         | <b>5,128.03</b>   |
| 133                          | 361.59           | 360.07           | 376.87           | 379.30           | <b>1,477.83</b>   |
| 134                          | 763.28           | 826.15           | 897.62           | 960.87           | <b>3,447.92</b>   |
| 135                          | 411.12           | 411.70           | 374.93           | 392.62           | <b>1,590.38</b>   |
| 136                          | 1,026.38         | 1,209.39         | 1,218.92         | 1,348.12         | <b>4,802.81</b>   |
| 137                          | 371.61           | 390.96           | 456.12           | 461.04           | <b>1,679.73</b>   |
| 138                          | 822.32           | 898.82           | 926.95           | 985.38           | <b>3,633.47</b>   |
| 139                          | 492.79           | 573.11           | 570.49           | 675.07           | <b>2,311.46</b>   |
| 140                          | 2,612.32         | 2,784.42         | 2,670.02         | 2,843.23         | <b>10,910.00</b>  |
| 141                          | 1,008.47         | 1,135.44         | 1,129.44         | 1,198.31         | <b>4,471.66</b>   |
| 142                          | 3,639.54         | 3,845.78         | 3,839.34         | 4,212.57         | <b>15,537.23</b>  |
| 143                          | 907.03           | 964.28           | 940.57           | 983.88           | <b>3,795.76</b>   |
| 144                          | 954.71           | 1,000.54         | 986.90           | 1,046.71         | <b>3,988.85</b>   |
| 145                          | 721.32           | 742.91           | 758.79           | 813.17           | <b>3,036.19</b>   |
| 146                          | 2,357.06         | 2,488.73         | 2,632.79         | 2,766.07         | <b>10,244.65</b>  |
| 147                          | 895.17           | 944.46           | 902.54           | 934.97           | <b>3,677.14</b>   |
| 148                          | 1,285.15         | 1,404.62         | 1,368.60         | 1,441.75         | <b>5,500.13</b>   |
| 149                          | 286.81           | 351.20           | 343.90           | 374.43           | <b>1,356.34</b>   |
| <b>NY - NEW YORK - Total</b> | <b>57,407.42</b> | <b>60,751.72</b> | <b>61,082.71</b> | <b>65,035.79</b> | <b>244,277.64</b> |

**STATE: OH - OHIO**

| REGISTRANT ZIP CODE 3 | 1ST QUARTER | 2ND QUARTER | 3RD QUARTER | 4TH QUARTER | TOTAL GRAMS      |
|-----------------------|-------------|-------------|-------------|-------------|------------------|
| 430                   | 3,208.93    | 3,330.53    | 3,384.53    | 3,495.53    | <b>13,419.51</b> |
| 431                   | 2,542.38    | 2,661.12    | 2,583.68    | 2,649.38    | <b>10,436.56</b> |
| 432                   | 5,304.15    | 5,600.83    | 5,819.28    | 6,340.33    | <b>23,064.59</b> |
| 433                   | 1,157.82    | 1,196.46    | 1,282.87    | 1,381.03    | <b>5,018.18</b>  |
| 434                   | 339.38      | 374.71      | 341.96      | 370.99      | <b>1,427.05</b>  |
| 435                   | 646.06      | 649.77      | 628.81      | 690.66      | <b>2,615.30</b>  |
| 436                   | 2,118.98    | 2,280.22    | 2,122.37    | 2,291.92    | <b>8,813.49</b>  |
| 437                   | 1,366.03    | 1,423.48    | 1,449.75    | 1,563.54    | <b>5,802.80</b>  |
| 438                   | 64.44       | 63.78       | 75.28       | 80.74       | <b>284.25</b>    |
| 439                   | 1,924.58    | 2,032.12    | 1,911.17    | 1,978.12    | <b>7,845.99</b>  |
| 440                   | 2,280.69    | 2,379.24    | 2,216.48    | 2,368.85    | <b>9,245.26</b>  |
| 441                   | 3,200.89    | 3,369.22    | 3,353.67    | 3,563.94    | <b>13,487.72</b> |
| 442                   | 1,614.40    | 1,704.65    | 1,692.94    | 1,777.16    | <b>6,789.15</b>  |
| 443                   | 835.94      | 879.88      | 849.84      | 945.32      | <b>3,510.98</b>  |
| 444                   | 1,410.03    | 1,516.04    | 1,465.90    | 1,587.57    | <b>5,979.54</b>  |
| 445                   | 1,550.45    | 1,669.64    | 1,686.54    | 1,731.57    | <b>6,638.21</b>  |
| 446                   | 781.15      | 806.24      | 829.49      | 873.70      | <b>3,290.58</b>  |
| 447                   | 823.25      | 817.17      | 861.99      | 890.21      | <b>3,392.62</b>  |

|                          |                  |                  |                  |                  |                   |
|--------------------------|------------------|------------------|------------------|------------------|-------------------|
| 448                      | 1,149.03         | 1,258.79         | 1,166.67         | 1,287.97         | 4,862.46          |
| 449                      | 942.83           | 978.87           | 984.77           | 971.94           | 3,878.40          |
| 450                      | 2,876.37         | 3,217.55         | 3,282.42         | 3,405.74         | 12,782.08         |
| 451                      | 2,269.16         | 2,282.94         | 2,510.07         | 2,710.11         | 9,772.28          |
| 452                      | 5,000.42         | 4,566.12         | 4,719.05         | 4,946.45         | 19,232.04         |
| 453                      | 1,091.24         | 1,205.31         | 1,238.42         | 1,307.41         | 4,842.38          |
| 454                      | 2,224.11         | 2,278.30         | 2,098.22         | 2,296.00         | 8,896.62          |
| 455                      | 772.68           | 770.16           | 752.65           | 731.31           | 3,026.81          |
| 456                      | 4,888.97         | 5,052.96         | 5,015.07         | 5,219.46         | 20,176.46         |
| 457                      | 1,059.92         | 1,136.32         | 1,069.32         | 1,195.27         | 4,460.82          |
| 458                      | 489.96           | 550.67           | 611.34           | 729.71           | 2,381.68          |
| <b>OH - OHIO - Total</b> | <b>53,934.23</b> | <b>56,053.09</b> | <b>56,004.55</b> | <b>59,381.94</b> | <b>225,373.82</b> |

**STATE: OK - OKLAHOMA**

| REGISTRANT ZIP CODE 3        | 1ST QUARTER      | 2ND QUARTER      | 3RD QUARTER      | 4TH QUARTER      | TOTAL GRAMS      |
|------------------------------|------------------|------------------|------------------|------------------|------------------|
| 730                          | 1,837.03         | 1,962.91         | 2,059.95         | 2,417.19         | 8,277.08         |
| 731                          | 2,818.65         | 3,043.86         | 3,085.64         | 3,262.82         | 12,210.98        |
| 734                          | 123.62           | 149.59           | 154.25           | 182.47           | 609.93           |
| 735                          | 574.85           | 603.13           | 646.58           | 676.74           | 2,501.30         |
| 736                          | 141.05           | 148.27           | 157.83           | 153.76           | 600.90           |
| 737                          | 215.72           | 223.08           | 239.37           | 241.19           | 919.36           |
| 738                          | 65.38            | 71.70            | 83.00            | 75.25            | 295.32           |
| 739                          | 14.42            | 14.55            | 18.13            | 15.28            | 62.38            |
| 740                          | 2,328.52         | 2,539.24         | 2,769.73         | 3,031.13         | 10,668.61        |
| 741                          | 1,625.64         | 1,734.65         | 1,882.33         | 1,997.78         | 7,240.40         |
| 743                          | 233.70           | 240.72           | 281.17           | 328.81           | 1,084.40         |
| 744                          | 898.84           | 1,009.31         | 1,053.38         | 1,159.14         | 4,120.67         |
| 745                          | 237.37           | 273.00           | 335.75           | 332.91           | 1,179.03         |
| 746                          | 201.49           | 197.86           | 205.90           | 229.83           | 835.09           |
| 747                          | 125.52           | 158.12           | 173.85           | 242.90           | 700.39           |
| 748                          | 672.99           | 734.44           | 761.24           | 851.76           | 3,020.43         |
| 749                          | 258.28           | 254.36           | 302.59           | 328.72           | 1,143.96         |
| <b>OK - OKLAHOMA - Total</b> | <b>12,373.07</b> | <b>13,358.80</b> | <b>14,210.69</b> | <b>15,527.70</b> | <b>55,470.25</b> |

**STATE: OR - OREGON**

| REGISTRANT ZIP CODE 3 | 1ST QUARTER | 2ND QUARTER | 3RD QUARTER | 4TH QUARTER | TOTAL GRAMS |
|-----------------------|-------------|-------------|-------------|-------------|-------------|
| 970                   | 1,865.61    | 2,010.05    | 1,992.27    | 2,256.59    | 8,124.51    |
| 971                   | 769.18      | 855.81      | 910.18      | 1,084.25    | 3,619.41    |
| 972                   | 3,054.90    | 3,111.23    | 3,255.16    | 3,530.60    | 12,951.90   |
| 973                   | 1,543.33    | 1,712.90    | 1,761.51    | 1,880.92    | 6,898.67    |
| 974                   | 1,687.04    | 1,828.69    | 1,923.28    | 2,118.87    | 7,557.88    |
| 975                   | 1,069.09    | 1,110.02    | 1,199.20    | 1,304.96    | 4,683.27    |

|                            |                  |                  |                  |                  |                  |
|----------------------------|------------------|------------------|------------------|------------------|------------------|
| 976                        | 44.93            | 53.40            | 61.22            | 84.86            | 244.41           |
| 977                        | 408.71           | 453.78           | 463.64           | 502.79           | 1,828.93         |
| 978                        | 653.61           | 707.97           | 766.62           | 898.72           | 3,026.93         |
| 979                        | 46.58            | 55.90            | 68.37            | 67.88            | 238.73           |
| <b>OR - OREGON - Total</b> | <b>11,143.00</b> | <b>11,899.75</b> | <b>12,401.45</b> | <b>13,730.44</b> | <b>49,174.65</b> |

**STATE: PA - PENNSYLVANIA**

| REGISTRANT ZIP CODE 3 | 1ST QUARTER | 2ND QUARTER | 3RD QUARTER | 4TH QUARTER | TOTAL GRAMS |
|-----------------------|-------------|-------------|-------------|-------------|-------------|
| 150                   | 3,488.37    | 3,760.84    | 3,770.91    | 4,042.23    | 15,062.35   |
| 151                   | 2,728.19    | 3,029.40    | 3,016.20    | 2,968.77    | 11,742.57   |
| 152                   | 6,181.73    | 6,291.22    | 5,692.04    | 6,119.86    | 24,284.86   |
| 153                   | 1,977.62    | 1,849.33    | 1,984.74    | 2,125.40    | 7,937.08    |
| 154                   | 1,374.97    | 1,584.48    | 1,829.68    | 1,986.47    | 6,775.60    |
| 155                   | 476.90      | 481.62      | 553.45      | 675.73      | 2,187.70    |
| 156                   | 3,330.61    | 3,579.06    | 3,558.55    | 3,682.73    | 14,150.95   |
| 157                   | 713.70      | 758.45      | 775.04      | 845.39      | 3,092.59    |
| 158                   | 695.63      | 721.25      | 708.85      | 746.97      | 2,872.70    |
| 159                   | 1,287.55    | 1,423.35    | 1,402.28    | 1,516.93    | 5,630.11    |
| 160                   | 1,490.02    | 1,537.51    | 1,577.95    | 1,672.68    | 6,278.16    |
| 161                   | 1,278.74    | 1,382.97    | 1,437.06    | 1,505.25    | 5,604.02    |
| 162                   | 844.85      | 896.90      | 911.35      | 909.24      | 3,562.34    |
| 163                   | 736.56      | 879.82      | 888.96      | 989.72      | 3,495.05    |
| 164                   | 284.09      | 289.83      | 286.83      | 270.71      | 1,131.45    |
| 165                   | 1,838.68    | 1,973.44    | 1,908.30    | 1,969.70    | 7,690.12    |
| 166                   | 1,940.23    | 2,089.89    | 2,111.08    | 2,212.02    | 8,353.21    |
| 167                   | 144.95      | 155.16      | 151.30      | 231.88      | 683.29      |
| 168                   | 694.56      | 795.52      | 801.99      | 852.63      | 3,144.70    |
| 169                   | 149.12      | 148.82      | 172.51      | 204.53      | 674.98      |
| 170                   | 1,832.29    | 1,934.94    | 1,953.51    | 2,143.92    | 7,864.66    |
| 171                   | 470.48      | 557.52      | 540.98      | 641.18      | 2,210.16    |
| 172                   | 841.10      | 926.94      | 943.04      | 1,034.89    | 3,745.97    |
| 173                   | 1,030.80    | 1,101.26    | 1,137.70    | 1,170.01    | 4,439.76    |
| 174                   | 533.92      | 598.77      | 572.98      | 638.05      | 2,343.71    |
| 175                   | 327.75      | 379.13      | 387.28      | 427.50      | 1,521.66    |
| 176                   | 492.72      | 547.71      | 534.73      | 548.37      | 2,123.54    |
| 177                   | 1,616.49    | 1,834.57    | 1,818.60    | 2,023.20    | 7,292.87    |
| 178                   | 926.52      | 1,009.21    | 990.36      | 1,099.96    | 4,026.06    |
| 179                   | 512.48      | 541.74      | 528.99      | 667.18      | 2,250.39    |
| 180                   | 857.75      | 980.23      | 1,088.71    | 983.06      | 3,909.75    |
| 181                   | 493.02      | 558.89      | 550.42      | 636.46      | 2,238.79    |
| 182                   | 444.25      | 465.29      | 429.06      | 467.90      | 1,806.50    |



|                                  |                  |                  |                  |                  |                   |
|----------------------------------|------------------|------------------|------------------|------------------|-------------------|
| 183                              | 476.34           | 533.24           | 499.90           | 575.72           | 2,085.20          |
| 184                              | 1,010.33         | 1,163.16         | 1,255.78         | 1,332.15         | 4,761.43          |
| 185                              | 2,196.31         | 2,184.37         | 2,205.88         | 2,304.68         | 8,891.24          |
| 186                              | 1,011.20         | 1,063.39         | 971.01           | 1,082.25         | 4,127.84          |
| 187                              | 2,062.66         | 2,156.39         | 2,043.86         | 2,264.29         | 8,527.19          |
| 188                              | 368.50           | 484.32           | 484.77           | 519.65           | 1,857.23          |
| 189                              | 1,123.94         | 1,190.04         | 1,182.28         | 1,251.00         | 4,747.26          |
| 190                              | 5,370.76         | 5,641.32         | 5,520.78         | 5,964.03         | 22,496.90         |
| 191                              | 8,069.36         | 9,214.39         | 9,240.37         | 10,344.06        | 36,868.18         |
| 193                              | 979.94           | 989.46           | 984.33           | 1,152.26         | 4,105.99          |
| 194                              | 1,801.73         | 1,795.44         | 1,761.51         | 1,900.49         | 7,259.16          |
| 195                              | 295.10           | 314.00           | 317.04           | 356.77           | 1,282.91          |
| 196                              | 664.17           | 699.97           | 688.17           | 759.64           | 2,811.95          |
| <b>PA - PENNSYLVANIA - Total</b> | <b>67,466.98</b> | <b>72,494.54</b> | <b>72,171.09</b> | <b>77,817.54</b> | <b>289,950.16</b> |

**STATE: PR - PUERTO RICO**

| REGISTRANT ZIP CODE 3           | 1ST QUARTER     | 2ND QUARTER     | 3RD QUARTER     | 4TH QUARTER     | TOTAL GRAMS     |
|---------------------------------|-----------------|-----------------|-----------------|-----------------|-----------------|
| 006                             | 504.01          | 483.11          | 472.26          | 495.10          | 1,954.47        |
| 007                             | 1,184.84        | 1,150.89        | 1,192.57        | 1,201.68        | 4,729.98        |
| 009                             | 445.14          | 457.02          | 457.86          | 456.66          | 1,816.68        |
| <b>PR - PUERTO RICO - Total</b> | <b>2,133.98</b> | <b>2,091.02</b> | <b>2,122.69</b> | <b>2,153.44</b> | <b>8,501.12</b> |

**STATE: RI - RHODE ISLAND**

| REGISTRANT ZIP CODE 3            | 1ST QUARTER     | 2ND QUARTER     | 3RD QUARTER     | 4TH QUARTER     | TOTAL GRAMS      |
|----------------------------------|-----------------|-----------------|-----------------|-----------------|------------------|
| 028                              | 4,538.03        | 4,386.88        | 4,580.81        | 5,028.84        | 18,534.56        |
| 029                              | 3,577.61        | 3,487.67        | 3,495.70        | 3,596.22        | 14,157.19        |
| <b>RI - RHODE ISLAND - Total</b> | <b>8,115.64</b> | <b>7,874.54</b> | <b>8,076.51</b> | <b>8,625.05</b> | <b>32,691.74</b> |

**STATE: SC - SOUTH CAROLINA**

| REGISTRANT ZIP CODE 3              | 1ST QUARTER      | 2ND QUARTER      | 3RD QUARTER      | 4TH QUARTER      | TOTAL GRAMS      |
|------------------------------------|------------------|------------------|------------------|------------------|------------------|
| 290                                | 363.51           | 408.71           | 434.51           | 480.57           | 1,687.31         |
| 291                                | 401.09           | 457.68           | 484.77           | 541.90           | 1,885.44         |
| 292                                | 437.59           | 513.28           | 526.59           | 518.29           | 1,995.75         |
| 293                                | 1,600.16         | 1,757.98         | 1,694.77         | 1,885.52         | 6,938.43         |
| 294                                | 1,926.27         | 2,038.09         | 2,107.55         | 2,217.87         | 8,289.79         |
| 295                                | 2,142.02         | 2,415.71         | 2,701.31         | 2,887.65         | 10,146.69        |
| 296                                | 3,393.79         | 3,600.48         | 3,549.85         | 3,876.10         | 14,420.21        |
| 297                                | 645.49           | 704.46           | 743.32           | 795.68           | 2,888.95         |
| 298                                | 182.84           | 188.10           | 192.28           | 226.30           | 789.52           |
| 299                                | 475.61           | 474.65           | 504.44           | 521.17           | 1,975.86         |
| <b>SC - SOUTH CAROLINA - Total</b> | <b>11,568.36</b> | <b>12,559.14</b> | <b>12,939.38</b> | <b>13,951.06</b> | <b>51,017.95</b> |

**STATE: SD - SOUTH DAKOTA**

| REGISTRANT ZIP CODE 3 | 1ST QUARTER | 2ND QUARTER | 3RD QUARTER | 4TH QUARTER | TOTAL GRAMS |
|-----------------------|-------------|-------------|-------------|-------------|-------------|
|-----------------------|-------------|-------------|-------------|-------------|-------------|

|                                  |               |               |               |               |                 |
|----------------------------------|---------------|---------------|---------------|---------------|-----------------|
| 570                              | 45.45         | 48.23         | 50.68         | 55.51         | 199.87          |
| 571                              | 167.55        | 205.51        | 233.07        | 218.30        | 824.42          |
| 572                              | 57.18         | 54.21         | 53.82         | 48.38         | 213.59          |
| 573                              | 17.12         | 17.15         | 19.09         | 15.17         | 68.52           |
| 574                              | 76.60         | 68.66         | 75.26         | 80.08         | 300.59          |
| 575                              | 12.07         | 12.65         | 22.44         | 24.59         | 71.75           |
| 576                              | 6.26          | 7.91          | 6.27          | 7.00          | 27.44           |
| 577                              | 108.43        | 135.52        | 157.08        | 197.73        | 598.76          |
| <b>SD - SOUTH DAKOTA - Total</b> | <b>490.66</b> | <b>549.82</b> | <b>617.71</b> | <b>646.75</b> | <b>2,304.93</b> |

**STATE: TN - TENNESSEE**

| REGISTRANT ZIP CODE 3         | 1ST QUARTER      | 2ND QUARTER      | 3RD QUARTER      | 4TH QUARTER      | TOTAL GRAMS       |
|-------------------------------|------------------|------------------|------------------|------------------|-------------------|
| 370                           | 3,180.94         | 3,447.66         | 3,463.41         | 3,738.82         | 13,830.83         |
| 371                           | 4,014.79         | 4,240.20         | 4,712.55         | 4,894.80         | 17,862.34         |
| 372                           | 2,390.66         | 2,531.86         | 2,653.21         | 2,679.93         | 10,255.66         |
| 373                           | 1,658.15         | 1,798.04         | 1,947.02         | 2,196.25         | 7,599.46          |
| 374                           | 680.52           | 746.87           | 801.66           | 737.00           | 2,966.05          |
| 376                           | 7,055.98         | 7,468.98         | 7,075.10         | 6,960.14         | 28,560.20         |
| 377                           | 3,262.97         | 3,352.15         | 3,365.34         | 3,257.69         | 13,238.15         |
| 378                           | 4,978.33         | 5,166.14         | 5,115.33         | 5,069.86         | 20,329.66         |
| 379                           | 2,423.47         | 2,561.18         | 2,686.80         | 2,689.32         | 10,360.77         |
| 380                           | 858.77           | 911.30           | 951.87           | 976.93           | 3,698.87          |
| 381                           | 1,145.04         | 1,351.64         | 1,487.98         | 1,678.50         | 5,663.15          |
| 382                           | 501.40           | 492.72           | 489.41           | 524.09           | 2,007.61          |
| 383                           | 1,390.69         | 1,492.87         | 1,516.40         | 1,563.05         | 5,963.01          |
| 384                           | 982.41           | 1,105.63         | 1,214.85         | 1,152.60         | 4,455.49          |
| 385                           | 1,856.98         | 1,947.01         | 1,628.24         | 1,543.92         | 6,976.15          |
| <b>TN - TENNESSEE - Total</b> | <b>36,381.11</b> | <b>38,614.26</b> | <b>39,109.16</b> | <b>39,662.88</b> | <b>153,767.41</b> |

**STATE: TX - TEXAS**

| REGISTRANT ZIP CODE 3 | 1ST QUARTER | 2ND QUARTER | 3RD QUARTER | 4TH QUARTER | TOTAL GRAMS |
|-----------------------|-------------|-------------|-------------|-------------|-------------|
| 750                   | 2,613.97    | 2,694.76    | 2,804.81    | 2,882.67    | 10,996.20   |
| 751                   | 801.56      | 873.05      | 916.45      | 889.55      | 3,480.61    |
| 752                   | 1,010.92    | 1,077.07    | 1,162.43    | 1,215.88    | 4,466.30    |
| 753                   | 0.90        | 2.62        | 3.53        | 5.72        | 12.77       |
| 754                   | 528.28      | 520.95      | 547.31      | 553.00      | 2,149.54    |
| 755                   | 141.27      | 154.62      | 141.54      | 146.62      | 584.05      |
| 756                   | 512.01      | 596.82      | 586.09      | 595.41      | 2,290.34    |
| 757                   | 409.12      | 409.88      | 460.78      | 496.20      | 1,775.98    |
| 758                   | 60.39       | 57.84       | 61.33       | 67.54       | 247.10      |
| 759                   | 336.91      | 335.28      | 366.27      | 352.69      | 1,391.15    |
| 760                   | 2,014.69    | 2,084.40    | 2,162.10    | 2,200.17    | 8,461.37    |

|                           |                  |                  |                  |                  |                   |
|---------------------------|------------------|------------------|------------------|------------------|-------------------|
| 761                       | 1,046.38         | 1,041.26         | 1,100.93         | 1,159.48         | 4,348.06          |
| 762                       | 555.74           | 574.48           | 623.97           | 629.57           | 2,383.77          |
| 763                       | 324.07           | 344.60           | 359.06           | 370.53           | 1,398.27          |
| 764                       | 131.39           | 108.97           | 126.74           | 124.69           | 491.80            |
| 765                       | 313.95           | 336.44           | 382.41           | 397.81           | 1,430.60          |
| 766                       | 72.35            | 75.59            | 73.89            | 76.07            | 297.91            |
| 767                       | 157.92           | 153.39           | 200.15           | 195.45           | 706.91            |
| 768                       | 44.34            | 42.29            | 47.32            | 50.35            | 184.30            |
| 769                       | 65.90            | 80.60            | 81.09            | 100.78           | 328.38            |
| 770                       | 2,614.37         | 2,710.46         | 2,663.06         | 2,607.32         | 10,595.21         |
| 772                       | 0.00             | 0                | 0                | 0.00             | 0.01              |
| 773                       | 2,277.32         | 2,344.48         | 2,395.40         | 2,506.70         | 9,523.89          |
| 774                       | 964.92           | 988.94           | 973.04           | 981.67           | 3,908.57          |
| 775                       | 2,290.74         | 2,416.98         | 2,415.30         | 2,469.73         | 9,592.75          |
| 776                       | 898.98           | 882.11           | 898.03           | 928.51           | 3,607.62          |
| 777                       | 318.91           | 309.92           | 312.27           | 319.78           | 1,260.88          |
| 778                       | 299.97           | 322.48           | 317.93           | 333.04           | 1,273.42          |
| 779                       | 150.94           | 160.63           | 164.31           | 177.10           | 652.98            |
| 780                       | 358.19           | 318.75           | 315.32           | 307.92           | 1,300.18          |
| 781                       | 328.62           | 353.92           | 325.66           | 341.76           | 1,349.96          |
| 782                       | 988.56           | 1,058.58         | 1,053.64         | 1,160.91         | 4,261.69          |
| 783                       | 170.96           | 170.34           | 155.98           | 147.17           | 644.46            |
| 784                       | 347.06           | 357.99           | 339.81           | 334.36           | 1,379.22          |
| 785                       | 89.42            | 97.68            | 96.18            | 100.68           | 383.95            |
| 786                       | 1,041.83         | 1,110.27         | 1,253.03         | 1,332.89         | 4,738.02          |
| 787                       | 1,376.86         | 1,445.98         | 1,497.45         | 1,568.09         | 5,888.38          |
| 788                       | 50.96            | 83.57            | 95.04            | 144.46           | 374.02            |
| 789                       | 21.04            | 30.98            | 31.66            | 31.68            | 115.37            |
| 790                       | 28.37            | 25.31            | 29.47            | 35.79            | 118.94            |
| 791                       | 97.14            | 110.55           | 120.89           | 120.53           | 449.11            |
| 792                       | 3.22             | 2.06             | 1.84             | 3.18             | 10.31             |
| 793                       | 54.22            | 53.46            | 56.65            | 85.93            | 250.26            |
| 794                       | 203.75           | 214.68           | 212.52           | 216.35           | 847.29            |
| 795                       | 31.99            | 36.38            | 37.81            | 37.07            | 143.25            |
| 796                       | 232.03           | 244.88           | 270.32           | 324.55           | 1,071.78          |
| 797                       | 594.06           | 626.29           | 671.04           | 665.72           | 2,557.11          |
| 798                       | 3.22             | 5.01             | 8.13             | 8.84             | 25.21             |
| 799                       | 141.69           | 141.71           | 168.63           | 151.03           | 603.05            |
| <b>TX - TEXAS - Total</b> | <b>27,121.43</b> | <b>28,189.29</b> | <b>29,088.64</b> | <b>29,952.95</b> | <b>114,352.32</b> |

STATE: UT - UTAH

| REGISTRANT ZIP CODE 3    | 1ST QUARTER     | 2ND QUARTER      | 3RD QUARTER      | 4TH QUARTER      | TOTAL GRAMS      |
|--------------------------|-----------------|------------------|------------------|------------------|------------------|
| 840                      | 4,309.06        | 4,437.39         | 4,667.55         | 4,907.13         | 18,321.13        |
| 841                      | 2,424.30        | 2,540.81         | 2,620.44         | 2,725.50         | 10,311.05        |
| 843                      | 354.22          | 393.73           | 401.16           | 446.87           | 1,595.98         |
| 844                      | 836.70          | 881.04           | 922.19           | 942.91           | 3,582.84         |
| 845                      | 269.29          | 252.57           | 265.10           | 295.68           | 1,082.64         |
| 846                      | 1,131.55        | 1,196.76         | 1,240.78         | 1,294.49         | 4,863.58         |
| 847                      | 421.08          | 451.19           | 445.60           | 500.04           | 1,817.91         |
| <b>UT - UTAH - Total</b> | <b>9,746.20</b> | <b>10,153.49</b> | <b>10,562.84</b> | <b>11,112.60</b> | <b>41,575.13</b> |

**STATE: VA - VIRGINIA**

| REGISTRANT ZIP CODE 3        | 1ST QUARTER      | 2ND QUARTER      | 3RD QUARTER      | 4TH QUARTER      | TOTAL GRAMS      |
|------------------------------|------------------|------------------|------------------|------------------|------------------|
| 201                          | 1,303.03         | 1,327.96         | 1,368.38         | 1,390.11         | 5,389.48         |
| 220                          | 715.52           | 749.80           | 748.54           | 702.33           | 2,916.19         |
| 221                          | 520.21           | 537.41           | 524.40           | 586.84           | 2,168.85         |
| 222                          | 922.41           | 1,046.21         | 1,156.19         | 1,062.46         | 4,187.27         |
| 223                          | 180.59           | 188.07           | 190.53           | 209.32           | 768.51           |
| 224                          | 477.70           | 498.54           | 478.00           | 536.76           | 1,990.99         |
| 225                          | 225.02           | 251.65           | 234.81           | 245.24           | 956.72           |
| 226                          | 1,056.69         | 1,166.55         | 1,150.74         | 1,097.54         | 4,471.53         |
| 227                          | 214.83           | 193.46           | 199.07           | 223.23           | 830.58           |
| 228                          | 186.31           | 183.31           | 200.48           | 220.24           | 790.33           |
| 229                          | 423.79           | 474.67           | 476.19           | 536.49           | 1,911.14         |
| 230                          | 303.08           | 341.85           | 352.30           | 383.22           | 1,380.45         |
| 231                          | 934.47           | 974.41           | 981.39           | 1,114.73         | 4,005.00         |
| 232                          | 1,409.95         | 1,696.65         | 1,819.83         | 2,185.75         | 7,112.18         |
| 233                          | 278.37           | 291.33           | 303.09           | 332.59           | 1,205.38         |
| 234                          | 645.73           | 654.91           | 642.64           | 660.47           | 2,603.75         |
| 235                          | 137.42           | 170.49           | 162.99           | 171.98           | 642.89           |
| 236                          | 835.97           | 785.54           | 753.09           | 761.20           | 3,135.81         |
| 237                          | 96.34            | 107.49           | 107.74           | 113.05           | 424.63           |
| 238                          | 359.83           | 367.88           | 359.31           | 378.38           | 1,465.40         |
| 239                          | 119.92           | 132.24           | 128.59           | 158.30           | 539.03           |
| 240                          | 1,885.38         | 1,872.40         | 1,894.94         | 1,922.38         | 7,575.10         |
| 241                          | 751.34           | 803.12           | 806.84           | 824.17           | 3,185.47         |
| 242                          | 3,542.69         | 3,711.34         | 3,962.67         | 3,885.55         | 15,102.26        |
| 243                          | 840.96           | 901.40           | 967.86           | 952.79           | 3,663.01         |
| 244                          | 123.63           | 138.02           | 132.65           | 144.59           | 538.89           |
| 245                          | 776.20           | 779.14           | 831.37           | 956.42           | 3,343.14         |
| 246                          | 1,043.53         | 1,080.75         | 1,069.60         | 1,088.58         | 4,282.47         |
| <b>VA - VIRGINIA - Total</b> | <b>20,310.90</b> | <b>21,426.59</b> | <b>22,004.24</b> | <b>22,844.71</b> | <b>86,586.44</b> |

**STATE: VI - VIRGIN ISLANDS**

| REGISTRANT ZIP CODE 3              | 1ST QUARTER  | 2ND QUARTER  | 3RD QUARTER  | 4TH QUARTER  | TOTAL GRAMS  |
|------------------------------------|--------------|--------------|--------------|--------------|--------------|
| 008                                | 12.94        | 10.37        | 14.07        | 11.75        | 49.12        |
| <b>VI - VIRGIN ISLANDS - Total</b> | <b>12.94</b> | <b>10.37</b> | <b>14.07</b> | <b>11.75</b> | <b>49.12</b> |

**STATE: VT - VERMONT**

| REGISTRANT ZIP CODE 3       | 1ST QUARTER     | 2ND QUARTER     | 3RD QUARTER     | 4TH QUARTER     | TOTAL GRAMS      |
|-----------------------------|-----------------|-----------------|-----------------|-----------------|------------------|
| 050                         | 747.52          | 772.83          | 809.78          | 767.29          | 3,097.42         |
| 051                         | 256.19          | 261.72          | 264.95          | 303.31          | 1,086.16         |
| 052                         | 408.92          | 426.87          | 420.65          | 460.71          | 1,717.15         |
| 053                         | 375.04          | 342.97          | 321.44          | 340.34          | 1,379.79         |
| 054                         | 2,667.99        | 2,671.09        | 2,797.01        | 2,965.75        | 11,101.84        |
| 056                         | 732.52          | 744.18          | 771.13          | 815.82          | 3,063.65         |
| 057                         | 952.72          | 932.13          | 988.01          | 997.70          | 3,870.55         |
| 058                         | 467.63          | 441.65          | 456.34          | 482.43          | 1,848.05         |
| <b>VT - VERMONT - Total</b> | <b>6,608.52</b> | <b>6,593.44</b> | <b>6,829.31</b> | <b>7,133.34</b> | <b>27,164.61</b> |

**STATE: WA - WASHINGTON**

| REGISTRANT ZIP CODE 3          | 1ST QUARTER      | 2ND QUARTER      | 3RD QUARTER      | 4TH QUARTER      | TOTAL GRAMS      |
|--------------------------------|------------------|------------------|------------------|------------------|------------------|
| 980                            | 3,527.28         | 3,657.01         | 3,672.40         | 3,949.86         | 14,806.55        |
| 981                            | 2,599.43         | 2,794.59         | 2,809.98         | 3,051.26         | 11,255.26        |
| 982                            | 4,007.20         | 4,383.44         | 4,465.54         | 4,928.28         | 17,784.46        |
| 983                            | 1,897.36         | 2,049.14         | 2,192.72         | 2,414.15         | 8,553.37         |
| 984                            | 1,303.52         | 1,374.02         | 1,431.75         | 1,549.03         | 5,658.32         |
| 985                            | 1,828.11         | 1,987.42         | 2,052.31         | 2,246.84         | 8,114.68         |
| 986                            | 1,603.88         | 1,768.76         | 1,852.11         | 2,062.74         | 7,287.49         |
| 988                            | 708.30           | 784.42           | 822.26           | 904.05           | 3,219.02         |
| 989                            | 740.18           | 846.12           | 894.15           | 985.89           | 3,466.35         |
| 990                            | 153.84           | 180.04           | 200.27           | 250.66           | 784.81           |
| 991                            | 280.61           | 291.15           | 308.92           | 392.95           | 1,273.63         |
| 992                            | 1,822.28         | 1,984.28         | 2,096.76         | 2,372.00         | 8,275.31         |
| 993                            | 983.84           | 1,138.68         | 1,164.69         | 1,245.27         | 4,532.48         |
| 994                            | 207.77           | 216.80           | 236.19           | 251.96           | 912.72           |
| <b>WA - WASHINGTON - Total</b> | <b>21,663.59</b> | <b>23,455.86</b> | <b>24,200.06</b> | <b>26,604.94</b> | <b>95,924.45</b> |

**STATE: WI - WISCONSIN**

| REGISTRANT ZIP CODE 3 | 1ST QUARTER | 2ND QUARTER | 3RD QUARTER | 4TH QUARTER | TOTAL GRAMS |
|-----------------------|-------------|-------------|-------------|-------------|-------------|
| 530                   | 1,227.87    | 1,268.78    | 1,324.69    | 1,374.62    | 5,195.96    |
| 531                   | 1,399.68    | 1,546.75    | 1,586.12    | 1,686.75    | 6,219.30    |
| 532                   | 2,615.32    | 2,794.30    | 2,917.68    | 3,167.44    | 11,494.74   |
| 534                   | 216.69      | 222.22      | 264.27      | 288.01      | 991.18      |
| 535                   | 1,026.91    | 1,072.75    | 1,065.11    | 1,138.25    | 4,303.03    |
| 537                   | 891.63      | 889.82      | 898.77      | 877.55      | 3,557.77    |

|                               |                  |                  |                  |                  |                  |
|-------------------------------|------------------|------------------|------------------|------------------|------------------|
| 538                           | 33.82            | 33.37            | 33.24            | 29.55            | 129.98           |
| 539                           | 443.90           | 480.26           | 493.89           | 529.07           | 1,947.11         |
| 540                           | 91.77            | 111.94           | 120.54           | 117.00           | 441.24           |
| 541                           | 329.49           | 357.35           | 399.11           | 488.21           | 1,574.15         |
| 542                           | 128.94           | 121.19           | 133.76           | 131.96           | 515.84           |
| 543                           | 251.28           | 295.32           | 284.94           | 322.50           | 1,154.03         |
| 544                           | 452.07           | 445.94           | 472.40           | 490.68           | 1,861.09         |
| 545                           | 282.51           | 294.23           | 298.74           | 293.30           | 1,168.77         |
| 546                           | 316.71           | 314.21           | 328.62           | 334.95           | 1,294.49         |
| 547                           | 184.21           | 206.74           | 208.65           | 248.26           | 847.86           |
| 548                           | 220.80           | 240.74           | 237.29           | 257.72           | 956.55           |
| 549                           | 1,085.33         | 1,112.02         | 1,149.42         | 1,115.28         | 4,462.05         |
| <b>WI - WISCONSIN - Total</b> | <b>11,198.91</b> | <b>11,807.91</b> | <b>12,217.23</b> | <b>12,891.11</b> | <b>48,115.17</b> |

**STATE: WV - WEST VIRGINIA**

| REGISTRANT ZIP CODE 3             | 1ST QUARTER      | 2ND QUARTER      | 3RD QUARTER      | 4TH QUARTER      | TOTAL GRAMS      |
|-----------------------------------|------------------|------------------|------------------|------------------|------------------|
| 247                               | 279.28           | 286.46           | 281.36           | 323.64           | 1,170.74         |
| 248                               | 278.86           | 265.30           | 270.29           | 271.39           | 1,085.84         |
| 249                               | 99.76            | 95.41            | 93.17            | 100.71           | 389.04           |
| 250                               | 730.23           | 719.97           | 731.81           | 715.77           | 2,897.78         |
| 251                               | 236.82           | 303.80           | 309.70           | 343.59           | 1,193.91         |
| 252                               | 256.88           | 196.67           | 205.82           | 258.83           | 918.21           |
| 253                               | 1,367.42         | 1,388.88         | 1,412.77         | 1,385.52         | 5,554.59         |
| 254                               | 1,190.58         | 1,218.33         | 1,241.53         | 1,358.35         | 5,008.79         |
| 255                               | 1,359.04         | 1,390.06         | 1,382.94         | 1,425.02         | 5,557.06         |
| 256                               | 805.35           | 626.96           | 653.54           | 632.62           | 2,718.48         |
| 257                               | 1,035.87         | 1,186.43         | 1,309.57         | 1,396.97         | 4,928.85         |
| 258                               | 2,351.28         | 2,435.05         | 2,460.08         | 2,485.35         | 9,731.76         |
| 259                               | 313.88           | 322.69           | 334.83           | 318.94           | 1,290.33         |
| 260                               | 1,713.18         | 1,676.38         | 1,843.19         | 1,989.00         | 7,221.75         |
| 261                               | 579.11           | 585.14           | 626.40           | 647.66           | 2,438.31         |
| 262                               | 513.00           | 441.50           | 354.88           | 353.80           | 1,663.18         |
| 263                               | 894.74           | 874.62           | 850.24           | 903.23           | 3,522.83         |
| 264                               | 140.24           | 129.48           | 128.15           | 130.41           | 528.27           |
| 265                               | 1,243.93         | 1,238.82         | 1,284.30         | 1,305.00         | 5,072.05         |
| 266                               | 100.54           | 105.64           | 118.69           | 168.39           | 493.26           |
| 267                               | 236.55           | 255.07           | 314.61           | 319.56           | 1,125.79         |
| 268                               | 9.34             | 9.75             | 9.05             | 6.02             | 34.17            |
| <b>WV - WEST VIRGINIA - Total</b> | <b>15,735.89</b> | <b>15,752.44</b> | <b>16,216.90</b> | <b>16,839.75</b> | <b>64,544.98</b> |

**STATE: WY - WYOMING**

| REGISTRANT ZIP CODE 3 | 1ST QUARTER | 2ND QUARTER | 3RD QUARTER | 4TH QUARTER | TOTAL GRAMS |
|-----------------------|-------------|-------------|-------------|-------------|-------------|
|-----------------------|-------------|-------------|-------------|-------------|-------------|

|                             |                 |                 |                 |                 |                 |
|-----------------------------|-----------------|-----------------|-----------------|-----------------|-----------------|
| 820                         | 333.31          | 170.93          | 180.63          | 229.39          | 914.27          |
| 822                         | 13.83           | 19.79           | 17.23           | 22.01           | 72.86           |
| 823                         | 12.31           | 11.17           | 14.94           | 16.22           | 54.65           |
| 824                         | 116.39          | 146.75          | 138.42          | 141.94          | 543.49          |
| 825                         | 74.63           | 76.90           | 83.37           | 87.02           | 321.91          |
| 826                         | 433.98          | 469.16          | 454.59          | 465.46          | 1,823.19        |
| 827                         | 79.82           | 87.36           | 81.36           | 86.22           | 334.76          |
| 828                         | 56.68           | 56.65           | 66.85           | 68.34           | 248.52          |
| 829                         | 205.81          | 214.12          | 205.53          | 200.59          | 826.05          |
| 830                         | 26.76           | 30.93           | 35.52           | 27.19           | 120.41          |
| 831                         | 21.10           | 21.16           | 24.90           | 29.74           | 96.89           |
| <b>WY - WYOMING - Total</b> | <b>1,374.63</b> | <b>1,304.91</b> | <b>1,303.33</b> | <b>1,374.12</b> | <b>5,357.00</b> |

**DRUG: 9143 - OXYCODONE****STATE: AK - ALASKA**

| REGISTRANT ZIP CODE 3      | 1ST QUARTER      | 2ND QUARTER      | 3RD QUARTER      | 4TH QUARTER      | TOTAL GRAMS       |
|----------------------------|------------------|------------------|------------------|------------------|-------------------|
| 995                        | 17,731.98        | 17,291.57        | 16,494.31        | 14,810.23        | 66,328.08         |
| 996                        | 9,402.95         | 9,438.94         | 9,326.76         | 8,359.45         | 36,528.10         |
| 997                        | 2,951.85         | 3,095.34         | 3,087.95         | 2,748.14         | 11,883.26         |
| 998                        | 960.46           | 1,058.86         | 1,005.08         | 987.06           | 4,011.47          |
| 999                        | 390.92           | 345.29           | 346.61           | 258.24           | 1,341.05          |
| <b>AK - ALASKA - Total</b> | <b>31,438.15</b> | <b>31,229.99</b> | <b>30,260.70</b> | <b>27,163.11</b> | <b>120,091.96</b> |

**STATE: AL - ALABAMA**

| REGISTRANT ZIP CODE 3 | 1ST QUARTER | 2ND QUARTER | 3RD QUARTER | 4TH QUARTER | TOTAL GRAMS |
|-----------------------|-------------|-------------|-------------|-------------|-------------|
| 350                   | 24,916.15   | 23,722.92   | 22,773.36   | 22,046.61   | 93,459.04   |
| 351                   | 14,828.92   | 14,450.77   | 13,965.97   | 13,714.06   | 56,959.72   |
| 352                   | 20,580.40   | 19,532.33   | 19,131.67   | 18,825.08   | 78,069.48   |
| 354                   | 7,934.30    | 7,761.05    | 7,179.33    | 7,375.86    | 30,250.55   |
| 355                   | 11,695.35   | 11,223.39   | 10,821.40   | 10,355.04   | 44,095.17   |
| 356                   | 18,134.23   | 17,072.31   | 16,800.96   | 16,187.18   | 68,194.68   |
| 357                   | 9,773.97    | 9,400.31    | 8,774.43    | 8,811.62    | 36,760.33   |
| 358                   | 12,736.54   | 11,841.25   | 11,420.02   | 10,083.14   | 46,080.96   |
| 359                   | 18,912.07   | 18,804.42   | 17,583.77   | 17,730.28   | 73,030.55   |
| 360                   | 7,445.77    | 6,787.96    | 6,536.43    | 6,566.66    | 27,336.83   |
| 361                   | 5,020.83    | 4,803.05    | 4,348.78    | 4,551.98    | 18,724.64   |
| 362                   | 9,290.63    | 9,084.90    | 8,629.85    | 8,497.91    | 35,503.28   |
| 363                   | 8,896.36    | 8,659.80    | 8,492.09    | 8,210.60    | 34,258.85   |
| 364                   | 5,012.38    | 4,593.56    | 4,061.47    | 4,186.25    | 17,853.66   |
| 365                   | 15,288.78   | 14,436.00   | 13,800.92   | 13,553.88   | 57,079.58   |
| 366                   | 11,897.96   | 11,370.59   | 10,845.18   | 10,644.94   | 44,758.68   |
| 367                   | 1,647.17    | 1,669.44    | 1,591.04    | 1,526.34    | 6,433.99    |

|                             |                   |                   |                   |                   |                   |
|-----------------------------|-------------------|-------------------|-------------------|-------------------|-------------------|
| 368                         | 5,973.38          | 5,952.79          | 5,758.46          | 6,108.33          | <b>23,792.96</b>  |
| 369                         | 644.15            | 576.50            | 547.35            | 558.71            | <b>2,326.72</b>   |
| <b>AL - ALABAMA - Total</b> | <b>210,629.35</b> | <b>201,743.36</b> | <b>193,062.48</b> | <b>189,534.46</b> | <b>794,969.65</b> |

**STATE: AR - ARKANSAS**

| REGISTRANT ZIP CODE 3        | 1ST QUARTER       | 2ND QUARTER       | 3RD QUARTER       | 4TH QUARTER       | TOTAL GRAMS       |
|------------------------------|-------------------|-------------------|-------------------|-------------------|-------------------|
| 716                          | 3,998.93          | 3,664.38          | 3,551.36          | 3,236.66          | <b>14,451.33</b>  |
| 717                          | 2,689.60          | 2,560.16          | 2,371.66          | 2,280.99          | <b>9,902.42</b>   |
| 718                          | 2,851.12          | 2,854.65          | 2,769.24          | 2,596.70          | <b>11,071.71</b>  |
| 719                          | 4,813.49          | 4,576.81          | 4,261.06          | 4,209.83          | <b>17,861.19</b>  |
| 720                          | 15,308.57         | 14,336.17         | 12,952.09         | 11,806.53         | <b>54,403.37</b>  |
| 721                          | 13,549.23         | 12,973.29         | 11,909.84         | 11,215.91         | <b>49,648.28</b>  |
| 722                          | 11,125.27         | 10,259.82         | 9,252.47          | 9,016.05          | <b>39,653.61</b>  |
| 723                          | 4,718.45          | 4,470.32          | 3,467.69          | 3,119.56          | <b>15,776.02</b>  |
| 724                          | 5,133.60          | 5,054.42          | 4,739.41          | 4,648.33          | <b>19,575.76</b>  |
| 725                          | 5,116.61          | 4,566.04          | 4,041.12          | 3,906.20          | <b>17,629.96</b>  |
| 726                          | 6,700.18          | 5,748.08          | 5,043.49          | 4,844.60          | <b>22,336.35</b>  |
| 727                          | 26,302.56         | 25,466.67         | 24,074.13         | 22,381.96         | <b>98,225.31</b>  |
| 728                          | 5,332.31          | 5,385.00          | 4,982.95          | 4,317.85          | <b>20,018.11</b>  |
| 729                          | 18,320.87         | 17,615.82         | 17,020.08         | 15,413.46         | <b>68,370.22</b>  |
| <b>AR - ARKANSAS - Total</b> | <b>125,960.79</b> | <b>119,531.64</b> | <b>110,436.59</b> | <b>102,994.62</b> | <b>458,923.65</b> |

**STATE: AS - AMERICAN SAMOA**

| REGISTRANT ZIP CODE 3              | 1ST QUARTER  | 2ND QUARTER | 3RD QUARTER | 4TH QUARTER  | TOTAL GRAMS  |
|------------------------------------|--------------|-------------|-------------|--------------|--------------|
| 967                                | 10.76        | 6.72        | 6.72        | 12.55        | <b>36.76</b> |
| <b>AS - AMERICAN SAMOA - Total</b> | <b>10.76</b> | <b>6.72</b> | <b>6.72</b> | <b>12.55</b> | <b>36.76</b> |

**STATE: AZ - ARIZONA**

| REGISTRANT ZIP CODE 3       | 1ST QUARTER       | 2ND QUARTER       | 3RD QUARTER       | 4TH QUARTER       | TOTAL GRAMS         |
|-----------------------------|-------------------|-------------------|-------------------|-------------------|---------------------|
| 850                         | 77,662.97         | 73,470.57         | 70,864.29         | 69,461.82         | <b>291,459.65</b>   |
| 851                         | 19,348.62         | 17,730.32         | 17,064.86         | 17,083.17         | <b>71,226.96</b>    |
| 852                         | 89,316.22         | 82,326.72         | 80,947.38         | 73,567.70         | <b>326,158.02</b>   |
| 853                         | 68,505.95         | 63,791.44         | 60,200.74         | 60,184.77         | <b>252,682.91</b>   |
| 855                         | 6,650.23          | 6,209.12          | 6,104.72          | 5,987.84          | <b>24,951.91</b>    |
| 856                         | 12,583.68         | 11,899.90         | 11,784.64         | 11,042.49         | <b>47,310.71</b>    |
| 857                         | 58,723.72         | 55,111.97         | 53,619.40         | 52,417.78         | <b>219,872.87</b>   |
| 859                         | 6,306.40          | 6,058.46          | 5,984.00          | 5,751.35          | <b>24,100.21</b>    |
| 860                         | 5,488.97          | 5,155.40          | 4,694.34          | 4,385.02          | <b>19,723.73</b>    |
| 863                         | 12,294.39         | 12,071.29         | 11,809.75         | 11,258.56         | <b>47,433.99</b>    |
| 864                         | 16,179.39         | 14,024.56         | 13,032.67         | 13,346.81         | <b>56,583.42</b>    |
| 865                         | 241.16            | 222.33            | 214.71            | 175.27            | <b>853.47</b>       |
| <b>AZ - ARIZONA - Total</b> | <b>373,301.70</b> | <b>348,072.07</b> | <b>336,321.51</b> | <b>324,662.57</b> | <b>1,382,357.85</b> |

**STATE: CA - CALIFORNIA**



| REGISTRANT ZIP CODE 3 | 1ST QUARTER | 2ND QUARTER | 3RD QUARTER | 4TH QUARTER | TOTAL GRAMS |
|-----------------------|-------------|-------------|-------------|-------------|-------------|
| 900                   | 21,353.64   | 21,581.88   | 20,960.40   | 20,354.59   | 84,250.52   |
| 902                   | 16,153.11   | 15,126.54   | 14,422.23   | 14,394.28   | 60,096.16   |
| 903                   | 1,106.62    | 1,099.35    | 1,060.13    | 1,190.79    | 4,456.89    |
| 904                   | 5,198.17    | 4,921.80    | 4,725.26    | 4,327.60    | 19,172.83   |
| 905                   | 3,511.19    | 3,715.20    | 3,535.79    | 3,586.03    | 14,348.21   |
| 906                   | 6,938.98    | 6,830.02    | 6,870.40    | 6,610.67    | 27,250.08   |
| 907                   | 8,631.88    | 7,815.51    | 7,930.28    | 7,489.96    | 31,867.63   |
| 908                   | 5,433.22    | 5,179.94    | 5,156.62    | 4,865.29    | 20,635.08   |
| 910                   | 3,963.57    | 3,947.66    | 3,966.14    | 3,915.42    | 15,792.79   |
| 911                   | 2,315.19    | 2,562.97    | 2,366.95    | 2,093.92    | 9,339.04    |
| 912                   | 3,251.46    | 3,317.58    | 3,053.11    | 2,760.69    | 12,382.83   |
| 913                   | 29,312.25   | 28,950.88   | 27,586.68   | 27,103.82   | 112,953.63  |
| 914                   | 8,442.66    | 8,391.20    | 8,019.82    | 8,254.26    | 33,107.93   |
| 915                   | 3,125.42    | 3,030.85    | 2,874.99    | 2,802.39    | 11,833.66   |
| 916                   | 1,712.98    | 1,665.29    | 1,648.05    | 1,720.63    | 6,746.96    |
| 917                   | 24,416.37   | 24,299.86   | 23,071.55   | 22,849.25   | 94,637.03   |
| 918                   | 487.55      | 468.04      | 526.10      | 518.42      | 2,000.11    |
| 919                   | 10,727.40   | 10,639.07   | 10,161.31   | 10,376.53   | 41,904.31   |
| 920                   | 45,902.00   | 45,136.55   | 42,188.00   | 40,496.33   | 173,722.87  |
| 921                   | 30,428.97   | 28,621.01   | 26,606.75   | 25,236.69   | 110,893.42  |
| 922                   | 26,325.64   | 24,800.41   | 23,794.54   | 23,446.71   | 98,367.30   |
| 923                   | 29,643.71   | 27,714.18   | 27,217.35   | 27,046.14   | 111,621.39  |
| 924                   | 4,664.94    | 4,261.52    | 3,767.16    | 3,593.22    | 16,286.84   |
| 925                   | 29,269.57   | 28,691.56   | 27,424.20   | 27,035.05   | 112,420.38  |
| 926                   | 26,166.33   | 25,779.23   | 24,582.48   | 24,329.14   | 100,857.18  |
| 927                   | 5,324.82    | 5,135.29    | 4,786.83    | 4,908.09    | 20,155.03   |
| 928                   | 20,669.17   | 19,590.21   | 18,969.28   | 18,307.75   | 77,536.41   |
| 930                   | 14,986.38   | 14,754.56   | 13,886.23   | 13,290.57   | 56,917.74   |
| 931                   | 2,527.42    | 2,384.69    | 2,207.80    | 2,300.23    | 9,420.13    |
| 932                   | 9,548.02    | 9,483.26    | 9,216.71    | 9,443.88    | 37,691.87   |
| 933                   | 12,458.11   | 12,280.36   | 11,766.42   | 11,503.98   | 48,008.87   |
| 934                   | 13,168.81   | 12,961.42   | 12,284.23   | 12,214.64   | 50,629.11   |
| 935                   | 20,112.17   | 19,437.92   | 18,428.71   | 17,793.69   | 75,772.49   |
| 936                   | 10,937.52   | 10,744.21   | 10,051.85   | 9,406.10    | 41,139.67   |
| 937                   | 13,176.75   | 13,115.23   | 12,999.16   | 12,833.23   | 52,124.38   |
| 939                   | 6,181.02    | 5,835.92    | 5,520.53    | 5,096.60    | 22,634.07   |
| 940                   | 12,536.79   | 11,951.19   | 11,494.79   | 10,964.96   | 46,947.73   |
| 941                   | 21,038.04   | 20,265.92   | 19,639.88   | 18,792.24   | 79,736.08   |
| 943                   | 3,239.82    | 3,102.90    | 2,995.61    | 2,765.76    | 12,104.10   |

|                                |                   |                   |                   |                   |                     |
|--------------------------------|-------------------|-------------------|-------------------|-------------------|---------------------|
| 944                            | 1,997.00          | 1,657.75          | 1,737.41          | 1,669.27          | 7,061.44            |
| 945                            | 48,408.29         | 45,142.04         | 44,206.30         | 42,683.11         | 180,439.74          |
| 946                            | 4,899.93          | 4,433.47          | 4,303.91          | 4,478.89          | 18,116.19           |
| 947                            | 1,647.97          | 1,615.27          | 1,579.31          | 1,344.81          | 6,187.36            |
| 948                            | 1,613.80          | 1,499.19          | 1,542.95          | 1,394.50          | 6,050.44            |
| 949                            | 9,803.96          | 8,965.81          | 8,639.15          | 8,365.63          | 35,774.55           |
| 950                            | 11,979.78         | 11,382.71         | 10,758.97         | 10,052.59         | 44,174.05           |
| 951                            | 8,758.87          | 8,948.01          | 8,064.63          | 7,518.08          | 33,289.60           |
| 952                            | 9,188.73          | 8,995.02          | 8,904.06          | 8,003.82          | 35,091.64           |
| 953                            | 34,262.02         | 33,220.03         | 30,361.97         | 28,593.43         | 126,437.44          |
| 954                            | 20,698.75         | 19,421.18         | 18,561.20         | 16,855.22         | 75,536.36           |
| 955                            | 5,792.60          | 5,290.62          | 5,063.10          | 4,757.35          | 20,903.67           |
| 956                            | 30,503.92         | 30,650.39         | 28,355.55         | 28,806.14         | 118,316.01          |
| 957                            | 5,488.33          | 4,992.74          | 4,765.26          | 4,606.68          | 19,853.02           |
| 958                            | 20,840.88         | 20,580.23         | 20,425.64         | 18,270.32         | 80,117.07           |
| 959                            | 20,135.52         | 18,205.21         | 16,743.48         | 14,988.53         | 70,072.74           |
| 960                            | 11,003.95         | 10,147.90         | 9,413.19          | 8,602.02          | 39,167.05           |
| 961                            | 2,524.38          | 2,701.11          | 2,437.52          | 2,226.98          | 9,889.99            |
| <b>CA - CALIFORNIA - Total</b> | <b>763,936.38</b> | <b>737,439.87</b> | <b>703,627.93</b> | <b>679,236.91</b> | <b>2,884,241.08</b> |

**STATE: CO - COLORADO**

| REGISTRANT ZIP CODE 3        | 1ST QUARTER       | 2ND QUARTER       | 3RD QUARTER       | 4TH QUARTER       | TOTAL GRAMS       |
|------------------------------|-------------------|-------------------|-------------------|-------------------|-------------------|
| 800                          | 32,329.03         | 31,185.36         | 33,451.30         | 33,806.36         | 130,772.05        |
| 801                          | 24,191.48         | 24,379.91         | 23,977.83         | 24,420.25         | 96,969.48         |
| 802                          | 39,612.67         | 37,732.92         | 34,870.12         | 32,871.01         | 145,086.72        |
| 803                          | 3,396.69          | 3,172.86          | 2,884.02          | 3,022.99          | 12,476.57         |
| 804                          | 6,052.96          | 5,198.41          | 5,371.27          | 5,346.72          | 21,969.36         |
| 805                          | 17,353.24         | 16,629.97         | 16,289.19         | 15,907.15         | 66,179.55         |
| 806                          | 8,994.47          | 8,908.46          | 8,465.94          | 8,146.75          | 34,515.63         |
| 807                          | 1,997.07          | 1,848.10          | 1,717.21          | 1,795.86          | 7,358.23          |
| 808                          | 4,680.64          | 4,366.25          | 4,434.93          | 4,085.92          | 17,567.74         |
| 809                          | 25,593.02         | 23,821.48         | 22,301.18         | 22,450.58         | 94,166.25         |
| 810                          | 18,319.59         | 17,263.30         | 16,874.78         | 16,171.40         | 68,629.07         |
| 811                          | 2,127.08          | 2,019.47          | 1,953.61          | 1,787.65          | 7,887.81          |
| 812                          | 3,203.45          | 2,907.81          | 2,918.02          | 2,935.93          | 11,965.21         |
| 813                          | 1,431.06          | 1,400.77          | 1,376.83          | 1,255.14          | 5,463.80          |
| 814                          | 2,171.60          | 2,062.60          | 1,985.79          | 1,917.84          | 8,137.83          |
| 815                          | 4,645.76          | 4,494.01          | 4,014.99          | 4,054.66          | 17,209.42         |
| 816                          | 3,551.63          | 3,276.00          | 3,276.82          | 3,258.45          | 13,362.90         |
| <b>CO - COLORADO - Total</b> | <b>199,651.44</b> | <b>190,667.68</b> | <b>186,163.83</b> | <b>183,234.65</b> | <b>759,717.61</b> |

**STATE: CT - CONNECTICUT**

| REGISTRANT ZIP CODE 3           | 1ST QUARTER       | 2ND QUARTER       | 3RD QUARTER       | 4TH QUARTER       | TOTAL GRAMS       |
|---------------------------------|-------------------|-------------------|-------------------|-------------------|-------------------|
| 060                             | 25,097.08         | 24,448.31         | 23,478.56         | 23,406.73         | 96,430.69         |
| 061                             | 7,807.07          | 7,311.35          | 7,130.53          | 7,139.20          | 29,388.15         |
| 062                             | 4,382.94          | 4,254.95          | 4,309.08          | 4,316.96          | 17,263.94         |
| 063                             | 12,013.70         | 11,768.11         | 11,543.50         | 11,582.26         | 46,907.57         |
| 064                             | 39,561.26         | 38,541.36         | 37,870.08         | 37,714.68         | 153,687.39        |
| 065                             | 15,164.84         | 15,283.51         | 15,060.60         | 15,345.77         | 60,854.71         |
| 066                             | 9,505.17          | 9,774.99          | 9,332.34          | 9,314.71          | 37,927.21         |
| 067                             | 16,491.12         | 15,652.33         | 15,176.16         | 14,477.77         | 61,797.37         |
| 068                             | 14,193.82         | 14,071.27         | 13,913.06         | 13,661.88         | 55,840.03         |
| 069                             | 2,278.49          | 2,243.35          | 2,230.16          | 2,095.64          | 8,847.63          |
| <b>CT - CONNECTICUT - Total</b> | <b>146,495.48</b> | <b>143,349.53</b> | <b>140,044.07</b> | <b>139,055.60</b> | <b>568,944.68</b> |

**STATE: DC - DISTRICT OF COLUMBIA**

| REGISTRANT ZIP CODE 3              | 1ST QUARTER      | 2ND QUARTER      | 3RD QUARTER      | 4TH QUARTER      | TOTAL GRAMS      |
|------------------------------------|------------------|------------------|------------------|------------------|------------------|
| 200                                | 11,922.01        | 11,791.10        | 11,212.82        | 11,185.23        | 46,111.16        |
| 203                                | 36.31            | 22.86            | 22.41            | 8.07             | 89.65            |
| 204                                | 1,021.47         | 777.80           | 822.81           | 806.67           | 3,428.75         |
| 205                                | 0                | 1.79             | 0                | 0                | 1.79             |
| <b>DC - DISTRICT OF COLUMBIA -</b> | <b>12,979.79</b> | <b>12,593.56</b> | <b>12,058.04</b> | <b>11,999.97</b> | <b>49,631.36</b> |

**STATE: DE - DELAWARE**

| REGISTRANT ZIP CODE 3        | 1ST QUARTER      | 2ND QUARTER      | 3RD QUARTER      | 4TH QUARTER      | TOTAL GRAMS       |
|------------------------------|------------------|------------------|------------------|------------------|-------------------|
| 197                          | 21,668.75        | 21,389.34        | 20,630.67        | 20,033.02        | 83,721.78         |
| 198                          | 13,375.17        | 13,628.62        | 13,590.52        | 13,218.99        | 53,813.30         |
| 199                          | 26,544.26        | 26,654.84        | 26,237.09        | 25,489.07        | 104,925.25        |
| <b>DE - DELAWARE - Total</b> | <b>61,588.18</b> | <b>61,672.80</b> | <b>60,458.28</b> | <b>58,741.07</b> | <b>242,460.33</b> |

**STATE: FL - FLORIDA**

| REGISTRANT ZIP CODE 3 | 1ST QUARTER | 2ND QUARTER | 3RD QUARTER | 4TH QUARTER | TOTAL GRAMS |
|-----------------------|-------------|-------------|-------------|-------------|-------------|
| 320                   | 32,450.24   | 30,913.69   | 28,398.51   | 27,946.95   | 119,709.38  |
| 321                   | 30,021.96   | 29,507.57   | 27,140.21   | 28,282.93   | 114,952.66  |
| 322                   | 60,428.05   | 58,963.40   | 52,602.35   | 52,170.52   | 224,164.32  |
| 323                   | 12,869.98   | 12,384.46   | 10,900.39   | 11,397.96   | 47,552.78   |
| 324                   | 15,889.82   | 15,655.90   | 14,896.97   | 13,430.38   | 59,873.07   |
| 325                   | 29,391.44   | 27,608.89   | 26,682.41   | 25,936.61   | 109,619.35  |
| 326                   | 22,198.91   | 21,052.85   | 19,646.77   | 19,918.60   | 82,817.14   |
| 327                   | 44,191.82   | 44,296.28   | 40,738.67   | 40,510.83   | 169,737.60  |
| 328                   | 27,902.64   | 26,480.52   | 23,825.39   | 24,794.56   | 103,003.12  |
| 329                   | 51,131.86   | 48,373.08   | 44,557.74   | 43,827.61   | 187,890.29  |
| 330                   | 64,087.28   | 62,358.96   | 57,212.04   | 56,149.15   | 239,807.42  |
| 331                   | 54,323.08   | 53,447.52   | 47,164.13   | 46,061.95   | 200,996.67  |
| 333                   | 45,387.46   | 42,275.68   | 38,877.73   | 38,216.96   | 164,757.83  |

|                             |                   |                   |                   |                   |                     |
|-----------------------------|-------------------|-------------------|-------------------|-------------------|---------------------|
| 334                         | 81,514.29         | 80,918.61         | 76,596.78         | 74,537.81         | 313,567.49          |
| 335                         | 40,803.16         | 39,129.84         | 35,301.61         | 34,846.55         | 150,081.16          |
| 336                         | 53,852.57         | 54,050.57         | 46,643.32         | 46,855.37         | 201,401.83          |
| 337                         | 49,362.57         | 48,553.11         | 43,482.62         | 42,946.67         | 184,344.97          |
| 338                         | 33,043.37         | 30,742.27         | 26,884.11         | 26,640.20         | 117,309.95          |
| 339                         | 45,229.49         | 41,229.94         | 37,803.80         | 38,393.79         | 162,657.03          |
| 341                         | 18,178.11         | 16,700.57         | 15,027.38         | 15,460.50         | 65,366.55           |
| 342                         | 48,386.79         | 44,791.25         | 40,739.65         | 41,172.93         | 175,090.62          |
| 344                         | 31,840.24         | 29,947.91         | 26,375.55         | 26,140.54         | 114,304.24          |
| 346                         | 49,442.88         | 47,764.62         | 44,060.10         | 43,832.54         | 185,100.14          |
| 347                         | 24,508.77         | 22,675.61         | 20,319.34         | 20,733.80         | 88,237.51           |
| 349                         | 29,269.86         | 28,574.50         | 26,965.59         | 27,348.12         | 112,158.07          |
| <b>FL - FLORIDA - Total</b> | <b>995,706.65</b> | <b>958,397.59</b> | <b>872,843.15</b> | <b>867,553.82</b> | <b>3,694,501.21</b> |

**STATE: GA - GEORGIA**

| REGISTRANT ZIP CODE 3       | 1ST QUARTER       | 2ND QUARTER       | 3RD QUARTER       | 4TH QUARTER       | TOTAL GRAMS         |
|-----------------------------|-------------------|-------------------|-------------------|-------------------|---------------------|
| 300                         | 72,765.31         | 71,419.47         | 68,989.85         | 69,280.89         | 282,455.53          |
| 301                         | 64,363.49         | 61,012.69         | 59,883.99         | 59,391.33         | 244,651.50          |
| 302                         | 39,273.75         | 38,492.69         | 37,734.94         | 37,932.74         | 153,434.12          |
| 303                         | 25,609.54         | 25,101.20         | 25,224.59         | 24,164.93         | 100,100.27          |
| 304                         | 9,096.30          | 8,670.94          | 7,982.45          | 8,138.81          | 33,888.50           |
| 305                         | 36,199.94         | 35,904.21         | 35,749.61         | 36,405.31         | 144,259.06          |
| 306                         | 27,583.06         | 26,224.30         | 24,911.39         | 24,906.74         | 103,625.49          |
| 307                         | 15,634.94         | 14,609.43         | 14,469.99         | 14,043.64         | 58,758.00           |
| 308                         | 7,142.65          | 6,897.21          | 6,373.21          | 6,378.73          | 26,791.81           |
| 309                         | 14,448.74         | 13,255.28         | 13,700.04         | 12,963.87         | 54,367.93           |
| 310                         | 24,240.20         | 23,462.31         | 19,839.72         | 20,126.62         | 87,668.84           |
| 312                         | 11,697.03         | 11,431.77         | 9,495.50          | 8,509.31          | 41,133.61           |
| 313                         | 8,531.01          | 8,025.85          | 8,112.71          | 7,119.80          | 31,789.38           |
| 314                         | 8,833.05          | 8,768.42          | 8,633.17          | 8,154.69          | 34,389.33           |
| 315                         | 17,666.96         | 16,948.03         | 16,547.97         | 16,485.38         | 67,648.35           |
| 316                         | 6,805.12          | 6,739.84          | 6,564.67          | 6,750.59          | 26,860.21           |
| 317                         | 11,893.98         | 11,677.01         | 11,518.54         | 11,787.88         | 46,877.41           |
| 318                         | 923.50            | 944.29            | 921.26            | 906.16            | 3,695.21            |
| 319                         | 6,954.50          | 6,637.51          | 6,883.18          | 6,416.98          | 26,892.17           |
| 398                         | 2,606.50          | 2,547.92          | 2,569.60          | 2,553.34          | 10,277.35           |
| <b>GA - GEORGIA - Total</b> | <b>412,269.59</b> | <b>398,770.38</b> | <b>386,106.36</b> | <b>382,417.75</b> | <b>1,579,564.08</b> |

**STATE: GU - GUAM**

| REGISTRANT ZIP CODE 3    | 1ST QUARTER   | 2ND QUARTER   | 3RD QUARTER   | 4TH QUARTER   | TOTAL GRAMS     |
|--------------------------|---------------|---------------|---------------|---------------|-----------------|
| 969                      | 931.05        | 680.17        | 856.25        | 678.37        | 3,145.83        |
| <b>GU - GUAM - Total</b> | <b>931.05</b> | <b>680.17</b> | <b>856.25</b> | <b>678.37</b> | <b>3,145.83</b> |

**STATE: HI - HAWAII**

| REGISTRANT ZIP CODE 3      | 1ST QUARTER      | 2ND QUARTER      | 3RD QUARTER      | 4TH QUARTER      | TOTAL GRAMS       |
|----------------------------|------------------|------------------|------------------|------------------|-------------------|
| 967                        | 27,192.66        | 26,667.74        | 24,659.52        | 23,987.83        | 102,507.75        |
| 968                        | 11,812.55        | 11,750.55        | 11,385.10        | 10,487.33        | 45,435.53         |
| <b>HI - HAWAII - Total</b> | <b>39,005.21</b> | <b>38,418.29</b> | <b>36,044.62</b> | <b>34,475.17</b> | <b>147,943.28</b> |

**STATE: IA - IOWA**

| REGISTRANT ZIP CODE 3    | 1ST QUARTER      | 2ND QUARTER      | 3RD QUARTER      | 4TH QUARTER      | TOTAL GRAMS       |
|--------------------------|------------------|------------------|------------------|------------------|-------------------|
| 500                      | 4,119.81         | 3,957.41         | 3,741.97         | 3,654.01         | 15,473.19         |
| 501                      | 2,887.24         | 2,807.67         | 2,659.22         | 2,564.55         | 10,918.68         |
| 502                      | 3,050.31         | 3,023.30         | 2,942.77         | 2,796.82         | 11,813.20         |
| 503                      | 9,397.42         | 8,944.39         | 8,553.61         | 8,772.22         | 35,667.64         |
| 504                      | 1,617.38         | 1,517.92         | 1,665.76         | 1,474.15         | 6,275.21          |
| 505                      | 1,401.14         | 1,268.94         | 1,267.85         | 1,178.89         | 5,116.83          |
| 506                      | 1,369.85         | 1,343.88         | 1,321.14         | 1,354.85         | 5,389.71          |
| 507                      | 1,254.19         | 1,188.55         | 1,155.16         | 1,237.44         | 4,835.35          |
| 508                      | 443.37           | 444.62           | 407.10           | 393.75           | 1,688.84          |
| 510                      | 635.24           | 610.76           | 575.14           | 540.52           | 2,361.65          |
| 511                      | 1,470.46         | 1,467.30         | 1,447.44         | 1,542.81         | 5,928.02          |
| 512                      | 331.58           | 331.49           | 305.31           | 283.72           | 1,252.11          |
| 513                      | 417.67           | 411.42           | 411.31           | 365.06           | 1,605.46          |
| 514                      | 686.20           | 660.73           | 639.28           | 579.92           | 2,566.14          |
| 515                      | 3,107.02         | 2,836.67         | 2,809.10         | 2,723.11         | 11,475.90         |
| 516                      | 416.52           | 425.30           | 424.88           | 413.61           | 1,680.31          |
| 520                      | 1,084.11         | 1,103.88         | 1,121.89         | 1,032.49         | 4,342.37          |
| 521                      | 449.45           | 393.16           | 390.65           | 344.36           | 1,577.61          |
| 522                      | 2,456.54         | 2,356.00         | 2,322.90         | 2,343.76         | 9,479.19          |
| 523                      | 1,135.20         | 993.80           | 955.57           | 915.84           | 4,000.41          |
| 524                      | 2,240.62         | 1,868.07         | 1,807.12         | 1,840.55         | 7,756.37          |
| 525                      | 1,856.64         | 1,899.13         | 1,700.54         | 1,684.98         | 7,141.29          |
| 526                      | 2,038.54         | 1,900.98         | 1,955.27         | 2,013.17         | 7,907.96          |
| 527                      | 1,423.87         | 1,431.98         | 1,371.55         | 1,293.19         | 5,520.59          |
| 528                      | 1,687.18         | 1,469.19         | 1,403.98         | 1,443.32         | 6,003.68          |
| <b>IA - IOWA - Total</b> | <b>46,977.54</b> | <b>44,656.56</b> | <b>43,356.50</b> | <b>42,787.09</b> | <b>177,777.69</b> |

**STATE: ID - IDAHO**

| REGISTRANT ZIP CODE 3 | 1ST QUARTER | 2ND QUARTER | 3RD QUARTER | 4TH QUARTER | TOTAL GRAMS |
|-----------------------|-------------|-------------|-------------|-------------|-------------|
| 832                   | 6,036.34    | 5,928.86    | 6,039.26    | 6,107.07    | 24,111.53   |
| 833                   | 6,444.85    | 6,164.08    | 6,007.90    | 5,893.61    | 24,510.44   |
| 834                   | 5,448.18    | 5,186.19    | 5,060.75    | 5,210.22    | 20,905.35   |
| 835                   | 1,757.45    | 1,755.52    | 1,554.51    | 1,580.77    | 6,648.25    |
| 836                   | 17,055.63   | 15,631.17   | 15,310.02   | 15,627.05   | 63,623.87   |

|                           |                  |                  |                  |                  |                   |
|---------------------------|------------------|------------------|------------------|------------------|-------------------|
| 837                       | 12,327.25        | 11,689.63        | 11,470.03        | 10,503.85        | <b>45,990.76</b>  |
| 838                       | 7,092.23         | 6,882.51         | 6,680.21         | 6,480.39         | <b>27,135.33</b>  |
| <b>ID - IDAHO - Total</b> | <b>56,161.93</b> | <b>53,237.95</b> | <b>52,122.67</b> | <b>51,402.97</b> | <b>212,925.53</b> |

**STATE: IL - ILLINOIS**

| REGISTRANT ZIP CODE 3        | 1ST QUARTER       | 2ND QUARTER       | 3RD QUARTER       | 4TH QUARTER       | TOTAL GRAMS       |
|------------------------------|-------------------|-------------------|-------------------|-------------------|-------------------|
| 600                          | 22,308.20         | 22,540.37         | 21,753.61         | 21,516.56         | <b>88,118.75</b>  |
| 601                          | 14,367.74         | 13,318.35         | 13,069.62         | 13,353.19         | <b>54,108.89</b>  |
| 602                          | 406.28            | 410.75            | 383.84            | 343.03            | <b>1,543.89</b>   |
| 603                          | 561.42            | 581.22            | 530.57            | 535.02            | <b>2,208.24</b>   |
| 604                          | 19,212.71         | 18,363.25         | 17,310.26         | 17,527.50         | <b>72,413.73</b>  |
| 605                          | 9,812.34          | 8,772.28          | 8,729.03          | 8,856.43          | <b>36,170.09</b>  |
| 606                          | 11,916.23         | 11,263.95         | 10,545.38         | 10,782.43         | <b>44,507.99</b>  |
| 607                          | 1,372.18          | 1,398.87          | 1,283.72          | 1,390.87          | <b>5,445.65</b>   |
| 608                          | 541.51            | 654.52            | 585.77            | 584.45            | <b>2,366.24</b>   |
| 609                          | 2,837.05          | 2,784.76          | 2,440.53          | 2,520.26          | <b>10,582.60</b>  |
| 610                          | 2,832.27          | 2,758.16          | 2,733.00          | 2,593.76          | <b>10,917.18</b>  |
| 611                          | 3,126.17          | 2,974.04          | 3,137.80          | 3,060.40          | <b>12,298.41</b>  |
| 612                          | 1,439.96          | 1,243.16          | 1,246.84          | 1,242.41          | <b>5,172.37</b>   |
| 613                          | 1,675.08          | 1,724.80          | 1,594.97          | 1,606.79          | <b>6,601.62</b>   |
| 614                          | 1,158.66          | 1,039.28          | 1,005.61          | 938.64            | <b>4,142.20</b>   |
| 615                          | 2,037.97          | 1,921.61          | 1,784.90          | 1,828.85          | <b>7,573.34</b>   |
| 616                          | 2,568.97          | 2,465.81          | 2,654.71          | 2,450.27          | <b>10,139.76</b>  |
| 617                          | 2,043.34          | 1,833.11          | 1,836.63          | 1,824.28          | <b>7,537.36</b>   |
| 618                          | 3,623.37          | 3,520.54          | 3,501.18          | 3,412.97          | <b>14,058.06</b>  |
| 619                          | 860.62            | 712.60            | 755.63            | 712.00            | <b>3,040.85</b>   |
| 620                          | 7,951.70          | 7,396.46          | 7,067.22          | 6,703.87          | <b>29,119.25</b>  |
| 622                          | 9,079.48          | 8,545.85          | 7,675.53          | 7,530.01          | <b>32,830.87</b>  |
| 623                          | 1,785.82          | 1,751.50          | 1,689.01          | 1,736.60          | <b>6,962.93</b>   |
| 624                          | 2,025.45          | 1,823.13          | 1,952.15          | 1,834.01          | <b>7,634.74</b>   |
| 625                          | 1,797.90          | 1,704.40          | 1,650.40          | 1,584.12          | <b>6,736.82</b>   |
| 626                          | 1,793.33          | 1,767.72          | 1,565.00          | 1,464.96          | <b>6,591.01</b>   |
| 627                          | 1,552.34          | 1,397.08          | 1,318.63          | 1,231.59          | <b>5,499.64</b>   |
| 628                          | 4,333.70          | 4,290.34          | 3,977.07          | 3,943.55          | <b>16,544.66</b>  |
| 629                          | 7,633.41          | 6,892.46          | 6,958.63          | 6,651.03          | <b>28,135.53</b>  |
| <b>IL - ILLINOIS - Total</b> | <b>142,655.20</b> | <b>135,850.40</b> | <b>130,737.24</b> | <b>129,759.85</b> | <b>539,002.68</b> |

**STATE: IN - INDIANA**

| REGISTRANT ZIP CODE 3 | 1ST QUARTER | 2ND QUARTER | 3RD QUARTER | 4TH QUARTER | TOTAL GRAMS       |
|-----------------------|-------------|-------------|-------------|-------------|-------------------|
| 460                   | 11,991.33   | 11,103.41   | 10,850.68   | 10,991.55   | <b>44,936.97</b>  |
| 461                   | 15,742.94   | 15,181.10   | 18,112.13   | 18,838.02   | <b>67,874.19</b>  |
| 462                   | 38,302.20   | 36,828.83   | 32,070.61   | 32,464.02   | <b>139,665.66</b> |

|                             |                   |                   |                   |                   |                   |
|-----------------------------|-------------------|-------------------|-------------------|-------------------|-------------------|
| 463                         | 16,434.76         | 14,761.67         | 14,722.69         | 14,623.67         | 60,542.79         |
| 464                         | 1,733.35          | 1,726.80          | 1,708.56          | 1,798.81          | 6,967.52          |
| 465                         | 16,409.43         | 15,202.02         | 14,398.62         | 13,709.23         | 59,719.30         |
| 466                         | 6,174.72          | 5,794.56          | 5,036.78          | 4,869.89          | 21,875.94         |
| 467                         | 7,890.09          | 7,329.38          | 7,195.02          | 7,420.45          | 29,834.94         |
| 468                         | 10,494.79         | 10,162.99         | 10,112.72         | 10,769.27         | 41,539.77         |
| 469                         | 9,043.55          | 8,282.94          | 8,004.41          | 7,880.04          | 33,210.93         |
| 470                         | 6,689.74          | 6,345.04          | 6,519.51          | 6,303.48          | 25,857.77         |
| 471                         | 15,490.28         | 14,397.82         | 13,325.30         | 13,146.51         | 56,359.90         |
| 472                         | 6,473.12          | 6,128.64          | 5,849.66          | 5,721.17          | 24,172.59         |
| 473                         | 11,370.55         | 11,066.88         | 11,100.38         | 11,242.52         | 44,780.34         |
| 474                         | 7,400.02          | 7,070.39          | 6,819.29          | 6,401.10          | 27,690.80         |
| 475                         | 4,971.36          | 4,699.75          | 4,225.30          | 4,272.13          | 18,168.53         |
| 476                         | 3,851.90          | 3,833.49          | 3,471.44          | 3,427.29          | 14,584.13         |
| 477                         | 10,653.68         | 10,245.04         | 9,397.93          | 9,165.56          | 39,462.20         |
| 478                         | 2,783.73          | 2,635.81          | 2,661.94          | 2,541.40          | 10,622.88         |
| 479                         | 8,429.73          | 7,681.56          | 6,731.76          | 5,960.89          | 28,803.94         |
| <b>IN - INDIANA - Total</b> | <b>212,331.25</b> | <b>200,478.12</b> | <b>192,314.74</b> | <b>191,547.00</b> | <b>796,671.10</b> |

**STATE: KS - KANSAS**

| REGISTRANT ZIP CODE 3      | 1ST QUARTER       | 2ND QUARTER       | 3RD QUARTER       | 4TH QUARTER       | TOTAL GRAMS       |
|----------------------------|-------------------|-------------------|-------------------|-------------------|-------------------|
| 660                        | 15,084.01         | 14,598.89         | 13,493.38         | 14,097.08         | 57,273.36         |
| 661                        | 7,575.55          | 6,506.58          | 6,129.04          | 6,570.27          | 26,781.44         |
| 662                        | 13,509.23         | 13,289.37         | 13,017.47         | 13,356.98         | 53,173.05         |
| 664                        | 2,166.96          | 1,947.94          | 2,015.42          | 1,781.08          | 7,911.41          |
| 665                        | 2,860.69          | 2,705.74          | 2,647.10          | 2,508.14          | 10,721.68         |
| 666                        | 5,788.68          | 5,720.74          | 5,667.81          | 5,621.60          | 22,798.82         |
| 667                        | 4,885.64          | 4,652.20          | 4,418.62          | 4,427.59          | 18,384.05         |
| 668                        | 1,533.42          | 1,440.30          | 1,269.65          | 1,282.03          | 5,525.40          |
| 669                        | 688.78            | 696.45            | 600.74            | 649.29            | 2,635.26          |
| 670                        | 8,094.72          | 8,033.45          | 7,470.68          | 7,671.11          | 31,269.96         |
| 671                        | 3,600.62          | 3,322.79          | 3,152.21          | 3,223.25          | 13,298.86         |
| 672                        | 23,488.96         | 23,046.98         | 22,265.76         | 22,276.90         | 91,078.60         |
| 673                        | 2,244.64          | 2,128.45          | 2,098.29          | 1,828.30          | 8,299.68          |
| 674                        | 4,881.92          | 4,898.45          | 4,683.83          | 4,558.33          | 19,022.53         |
| 675                        | 4,811.59          | 4,905.79          | 4,882.16          | 4,709.15          | 19,308.69         |
| 676                        | 2,236.89          | 2,117.79          | 2,056.23          | 2,059.70          | 8,470.60          |
| 677                        | 1,243.79          | 1,352.68          | 1,250.42          | 1,234.00          | 5,080.90          |
| 678                        | 4,367.30          | 4,153.64          | 3,956.12          | 3,895.48          | 16,372.54         |
| 679                        | 1,023.80          | 992.93            | 1,067.80          | 925.17            | 4,009.70          |
| <b>KS - KANSAS - Total</b> | <b>110,087.19</b> | <b>106,511.16</b> | <b>102,142.72</b> | <b>102,675.44</b> | <b>421,416.52</b> |

**STATE: KY - KENTUCKY**

| REGISTRANT ZIP CODE 3        | 1ST QUARTER       | 2ND QUARTER       | 3RD QUARTER       | 4TH QUARTER       | TOTAL GRAMS       |
|------------------------------|-------------------|-------------------|-------------------|-------------------|-------------------|
| 400                          | 8,023.85          | 7,660.33          | 7,247.72          | 7,391.74          | 30,323.64         |
| 401                          | 4,364.17          | 4,207.56          | 4,172.13          | 3,829.58          | 16,573.44         |
| 402                          | 33,611.28         | 31,978.70         | 30,549.64         | 31,194.86         | 127,334.49        |
| 403                          | 13,523.73         | 13,011.54         | 12,234.73         | 12,383.38         | 51,153.38         |
| 404                          | 7,094.17          | 6,981.77          | 6,539.01          | 6,453.22          | 27,068.16         |
| 405                          | 10,185.92         | 9,723.89          | 9,574.25          | 9,496.73          | 38,980.79         |
| 406                          | 1,379.77          | 1,299.42          | 1,273.28          | 1,285.32          | 5,237.79          |
| 407                          | 6,211.53          | 5,989.92          | 5,544.31          | 5,686.12          | 23,431.88         |
| 408                          | 1,148.61          | 1,112.43          | 1,113.05          | 1,083.55          | 4,457.65          |
| 409                          | 3,700.83          | 3,571.07          | 3,470.32          | 3,302.36          | 14,044.58         |
| 410                          | 27,702.63         | 27,046.07         | 26,215.36         | 26,066.81         | 107,030.86        |
| 411                          | 4,673.04          | 4,347.07          | 4,078.71          | 4,052.30          | 17,151.11         |
| 412                          | 1,922.98          | 1,935.35          | 2,038.66          | 1,959.54          | 7,856.54          |
| 413                          | 1,590.52          | 1,517.26          | 1,388.38          | 1,394.99          | 5,891.15          |
| 414                          | 819.20            | 731.34            | 736.06            | 741.76            | 3,028.36          |
| 415                          | 3,673.60          | 3,501.64          | 3,516.85          | 3,502.29          | 14,194.38         |
| 416                          | 3,038.78          | 3,172.18          | 3,063.07          | 3,126.84          | 12,400.88         |
| 417                          | 4,191.57          | 4,263.69          | 4,116.35          | 4,020.08          | 16,591.69         |
| 418                          | 1,719.80          | 1,631.22          | 1,701.43          | 1,615.51          | 6,667.97          |
| 420                          | 11,938.02         | 11,694.41         | 11,084.18         | 10,831.32         | 45,547.93         |
| 421                          | 9,766.79          | 9,686.06          | 9,104.12          | 8,947.14          | 37,504.11         |
| 422                          | 5,752.53          | 5,499.32          | 5,399.53          | 5,048.71          | 21,700.09         |
| 423                          | 6,561.88          | 6,244.91          | 6,130.81          | 5,621.35          | 24,558.94         |
| 424                          | 7,882.47          | 7,642.34          | 7,277.40          | 6,961.82          | 29,764.04         |
| 425                          | 2,892.62          | 2,728.54          | 2,601.29          | 2,617.37          | 10,839.82         |
| 426                          | 3,460.63          | 3,239.85          | 2,914.27          | 3,065.40          | 12,680.15         |
| 427                          | 7,148.75          | 6,932.86          | 6,740.13          | 6,363.44          | 27,185.18         |
| <b>KY - KENTUCKY - Total</b> | <b>193,979.66</b> | <b>187,350.73</b> | <b>179,825.04</b> | <b>178,043.55</b> | <b>739,198.98</b> |

**STATE: LA - LOUISIANA**

| REGISTRANT ZIP CODE 3 | 1ST QUARTER | 2ND QUARTER | 3RD QUARTER | 4TH QUARTER | TOTAL GRAMS |
|-----------------------|-------------|-------------|-------------|-------------|-------------|
| 700                   | 29,615.27   | 25,682.51   | 24,313.18   | 23,547.47   | 103,158.42  |
| 701                   | 12,503.91   | 12,274.11   | 12,313.31   | 12,092.14   | 49,183.47   |
| 703                   | 7,835.13    | 7,550.34    | 7,253.09    | 7,130.76    | 29,769.32   |
| 704                   | 24,853.75   | 23,657.22   | 22,975.66   | 22,252.72   | 93,739.35   |
| 705                   | 19,641.07   | 19,338.02   | 19,316.63   | 18,102.81   | 76,398.53   |
| 706                   | 6,027.13    | 5,801.35    | 5,810.85    | 5,592.60    | 23,231.94   |
| 707                   | 19,936.29   | 18,758.92   | 18,665.21   | 18,709.39   | 76,069.81   |
| 708                   | 13,483.77   | 12,950.65   | 12,605.55   | 12,437.92   | 51,477.89   |



|                               |                   |                   |                   |                   |                   |
|-------------------------------|-------------------|-------------------|-------------------|-------------------|-------------------|
| 710                           | 3,940.85          | 3,864.56          | 3,863.27          | 3,847.00          | 15,515.68         |
| 711                           | 14,031.39         | 13,328.37         | 13,445.10         | 13,412.60         | 54,217.47         |
| 712                           | 6,195.32          | 5,942.72          | 6,091.14          | 5,926.94          | 24,156.12         |
| 713                           | 10,510.93         | 10,044.15         | 9,628.29          | 9,738.91          | 39,922.28         |
| 714                           | 5,029.04          | 5,056.01          | 4,834.38          | 4,945.37          | 19,864.80         |
| <b>LA - LOUISIANA - Total</b> | <b>173,603.85</b> | <b>164,248.94</b> | <b>161,115.66</b> | <b>157,736.64</b> | <b>656,705.08</b> |

**STATE: MA - MASSACHUSETTS**

| REGISTRANT ZIP CODE 3             | 1ST QUARTER       | 2ND QUARTER       | 3RD QUARTER       | 4TH QUARTER       | TOTAL GRAMS       |
|-----------------------------------|-------------------|-------------------|-------------------|-------------------|-------------------|
| 010                               | 22,501.60         | 21,724.09         | 20,951.07         | 20,633.67         | 85,810.43         |
| 011                               | 8,961.43          | 8,559.53          | 8,384.41          | 8,213.96          | 34,119.34         |
| 012                               | 3,924.15          | 3,991.19          | 3,798.71          | 3,840.41          | 15,554.46         |
| 013                               | 3,696.77          | 3,579.55          | 3,577.77          | 3,477.93          | 14,332.01         |
| 014                               | 6,943.01          | 6,498.59          | 6,098.55          | 6,337.40          | 25,877.55         |
| 015                               | 9,964.36          | 9,731.46          | 9,049.47          | 8,896.19          | 37,641.49         |
| 016                               | 8,105.66          | 7,978.08          | 7,552.50          | 7,591.12          | 31,227.37         |
| 017                               | 8,467.94          | 8,285.23          | 8,052.74          | 8,102.63          | 32,908.55         |
| 018                               | 27,519.33         | 25,789.56         | 23,924.34         | 23,810.55         | 101,043.78        |
| 019                               | 14,491.38         | 13,645.18         | 12,821.84         | 12,744.03         | 53,702.43         |
| 020                               | 9,457.06          | 8,943.37          | 8,680.69          | 9,038.40          | 36,119.52         |
| 021                               | 32,405.48         | 31,650.42         | 30,749.37         | 30,396.72         | 125,201.99        |
| 022                               | 2,215.29          | 2,355.82          | 1,713.43          | 2,328.11          | 8,612.65          |
| 023                               | 16,271.87         | 15,986.13         | 14,974.28         | 15,255.09         | 62,487.37         |
| 024                               | 5,103.40          | 4,690.46          | 4,467.14          | 4,461.27          | 18,722.28         |
| 025                               | 4,390.37          | 4,267.29          | 4,295.43          | 4,006.76          | 16,959.85         |
| 026                               | 6,141.73          | 5,772.84          | 5,602.69          | 5,813.21          | 23,330.47         |
| 027                               | 26,105.91         | 25,509.62         | 24,833.80         | 24,541.99         | 100,991.32        |
| <b>MA - MASSACHUSETTS - Total</b> | <b>216,666.74</b> | <b>208,958.42</b> | <b>199,528.24</b> | <b>199,489.45</b> | <b>824,642.85</b> |

**STATE: MD - MARYLAND**

| REGISTRANT ZIP CODE 3 | 1ST QUARTER | 2ND QUARTER | 3RD QUARTER | 4TH QUARTER | TOTAL GRAMS |
|-----------------------|-------------|-------------|-------------|-------------|-------------|
| 206                   | 22,094.52   | 22,279.07   | 21,424.99   | 21,176.12   | 86,974.70   |
| 207                   | 26,391.59   | 24,544.54   | 24,327.56   | 22,606.50   | 97,870.19   |
| 208                   | 19,800.51   | 19,314.56   | 18,186.81   | 17,153.04   | 74,454.92   |
| 209                   | 4,304.39    | 4,001.33    | 3,753.45    | 3,538.78    | 15,597.95   |
| 210                   | 46,096.48   | 45,230.78   | 42,258.85   | 41,822.21   | 175,408.31  |
| 211                   | 20,262.87   | 18,161.15   | 17,497.92   | 17,375.88   | 73,297.82   |
| 212                   | 88,448.96   | 82,482.36   | 78,996.08   | 78,990.14   | 328,917.54  |
| 214                   | 4,088.47    | 3,782.65    | 3,985.86    | 3,874.60    | 15,731.57   |
| 215                   | 7,267.63    | 6,864.91    | 6,664.87    | 6,732.11    | 27,529.52   |
| 216                   | 9,011.23    | 9,105.05    | 8,930.94    | 8,896.75    | 35,943.96   |
| 217                   | 26,082.50   | 26,098.19   | 25,913.11   | 25,391.86   | 103,485.66  |

|                              |                   |                   |                   |                   |                     |
|------------------------------|-------------------|-------------------|-------------------|-------------------|---------------------|
| 218                          | 7,968.22          | 7,569.41          | 7,836.91          | 7,476.98          | <b>30,851.52</b>    |
| 219                          | 6,414.62          | 6,409.20          | 6,496.45          | 5,978.15          | <b>25,298.41</b>    |
| <b>MD - MARYLAND - Total</b> | <b>288,231.97</b> | <b>275,843.20</b> | <b>266,273.79</b> | <b>261,013.12</b> | <b>1,091,362.08</b> |

**STATE: ME - MAINE**

| REGISTRANT ZIP CODE 3     | 1ST QUARTER      | 2ND QUARTER      | 3RD QUARTER      | 4TH QUARTER      | TOTAL GRAMS       |
|---------------------------|------------------|------------------|------------------|------------------|-------------------|
| 039                       | 843.39           | 765.77           | 798.12           | 684.59           | <b>3,091.87</b>   |
| 040                       | 13,018.91        | 12,506.97        | 12,111.10        | 11,769.49        | <b>49,406.48</b>  |
| 041                       | 3,185.75         | 2,972.84         | 3,012.06         | 2,914.45         | <b>12,085.09</b>  |
| 042                       | 5,826.94         | 5,510.66         | 5,656.96         | 5,477.62         | <b>22,472.18</b>  |
| 043                       | 6,231.01         | 5,912.53         | 5,860.35         | 5,370.79         | <b>23,374.69</b>  |
| 044                       | 4,452.32         | 4,355.02         | 4,344.11         | 4,201.55         | <b>17,353.00</b>  |
| 045                       | 1,343.85         | 1,355.14         | 1,375.52         | 1,325.46         | <b>5,399.97</b>   |
| 046                       | 2,108.36         | 1,874.39         | 1,795.55         | 1,874.58         | <b>7,652.88</b>   |
| 047                       | 1,668.16         | 1,582.87         | 1,605.82         | 1,525.28         | <b>6,382.13</b>   |
| 048                       | 1,130.50         | 1,172.01         | 1,080.75         | 1,065.93         | <b>4,449.20</b>   |
| 049                       | 7,527.86         | 7,401.01         | 6,875.02         | 6,857.00         | <b>28,660.89</b>  |
| <b>ME - MAINE - Total</b> | <b>47,337.06</b> | <b>45,409.21</b> | <b>44,515.35</b> | <b>43,066.75</b> | <b>180,328.38</b> |

**STATE: MI - MICHIGAN**

| REGISTRANT ZIP CODE 3        | 1ST QUARTER       | 2ND QUARTER       | 3RD QUARTER       | 4TH QUARTER       | TOTAL GRAMS       |
|------------------------------|-------------------|-------------------|-------------------|-------------------|-------------------|
| 480                          | 44,044.27         | 41,608.50         | 40,221.77         | 38,001.29         | <b>163,875.83</b> |
| 481                          | 48,223.28         | 43,869.20         | 41,631.79         | 39,351.12         | <b>173,075.40</b> |
| 482                          | 37,038.47         | 33,126.90         | 29,911.17         | 29,090.32         | <b>129,166.86</b> |
| 483                          | 31,394.04         | 28,254.70         | 26,511.22         | 25,980.31         | <b>112,140.28</b> |
| 484                          | 7,021.74          | 6,809.61          | 6,469.59          | 6,380.20          | <b>26,681.15</b>  |
| 485                          | 3,586.29          | 3,480.25          | 3,192.17          | 3,036.65          | <b>13,295.36</b>  |
| 486                          | 7,605.78          | 7,429.81          | 7,066.79          | 6,929.29          | <b>29,031.67</b>  |
| 487                          | 3,742.59          | 3,527.06          | 3,446.60          | 3,270.11          | <b>13,986.37</b>  |
| 488                          | 9,967.83          | 9,156.94          | 8,664.72          | 8,636.56          | <b>36,426.05</b>  |
| 489                          | 4,572.53          | 4,245.86          | 4,053.00          | 3,900.15          | <b>16,771.54</b>  |
| 490                          | 15,769.23         | 14,701.80         | 13,872.30         | 13,866.85         | <b>58,210.18</b>  |
| 491                          | 1,946.75          | 1,782.13          | 1,683.66          | 1,821.94          | <b>7,234.48</b>   |
| 492                          | 8,744.36          | 8,136.57          | 7,268.11          | 7,029.80          | <b>31,178.85</b>  |
| 493                          | 2,795.29          | 2,564.75          | 2,612.71          | 2,509.58          | <b>10,482.33</b>  |
| 494                          | 6,369.39          | 5,850.14          | 5,718.43          | 5,537.86          | <b>23,475.81</b>  |
| 495                          | 6,866.28          | 6,185.83          | 5,815.07          | 5,820.37          | <b>24,687.54</b>  |
| 496                          | 7,897.57          | 7,436.19          | 7,287.37          | 7,058.63          | <b>29,679.77</b>  |
| 497                          | 6,962.21          | 6,845.27          | 6,369.88          | 5,927.01          | <b>26,104.37</b>  |
| 498                          | 4,051.31          | 3,747.58          | 3,594.94          | 3,390.18          | <b>14,784.01</b>  |
| 499                          | 1,328.21          | 1,354.54          | 1,284.06          | 1,076.54          | <b>5,043.35</b>   |
| <b>MI - MICHIGAN - Total</b> | <b>259,927.45</b> | <b>240,113.62</b> | <b>226,675.36</b> | <b>218,614.77</b> | <b>945,331.20</b> |

**STATE: MN - MINNESOTA**

| REGISTRANT ZIP CODE 3         | 1ST QUARTER       | 2ND QUARTER       | 3RD QUARTER       | 4TH QUARTER       | TOTAL GRAMS       |
|-------------------------------|-------------------|-------------------|-------------------|-------------------|-------------------|
| 550                           | 14,794.78         | 14,392.55         | 13,846.19         | 13,765.61         | 56,799.13         |
| 551                           | 22,575.77         | 22,097.92         | 22,027.66         | 20,410.38         | 87,111.73         |
| 553                           | 20,513.47         | 19,461.00         | 18,590.00         | 18,305.48         | 76,869.94         |
| 554                           | 34,292.99         | 33,098.69         | 31,723.86         | 31,533.98         | 130,649.52        |
| 556                           | 209.42            | 192.52            | 189.25            | 208.53            | 799.72            |
| 557                           | 4,296.54          | 4,103.24          | 3,982.77          | 4,005.27          | 16,387.82         |
| 558                           | 2,315.95          | 2,334.21          | 2,223.88          | 2,166.93          | 9,040.96          |
| 559                           | 6,017.93          | 5,513.34          | 5,180.75          | 5,047.08          | 21,759.09         |
| 560                           | 4,213.46          | 3,843.77          | 3,720.13          | 3,638.17          | 15,415.53         |
| 561                           | 1,059.19          | 1,049.56          | 1,016.29          | 955.06            | 4,080.10          |
| 562                           | 1,969.61          | 1,884.38          | 1,888.60          | 1,752.87          | 7,495.46          |
| 563                           | 6,524.00          | 6,304.54          | 5,801.06          | 5,763.19          | 24,392.79         |
| 564                           | 2,993.20          | 2,932.41          | 2,820.40          | 2,733.25          | 11,479.26         |
| 565                           | 2,662.09          | 2,524.47          | 2,340.25          | 2,110.22          | 9,637.04          |
| 566                           | 1,151.45          | 1,133.83          | 1,097.46          | 1,041.05          | 4,423.78          |
| 567                           | 1,419.88          | 1,310.37          | 1,272.58          | 1,183.56          | 5,186.38          |
| <b>MN - MINNESOTA - Total</b> | <b>127,009.73</b> | <b>122,176.79</b> | <b>117,721.14</b> | <b>114,620.63</b> | <b>481,528.29</b> |

**STATE: MO - MISSOURI**

| REGISTRANT ZIP CODE 3 | 1ST QUARTER | 2ND QUARTER | 3RD QUARTER | 4TH QUARTER | TOTAL GRAMS |
|-----------------------|-------------|-------------|-------------|-------------|-------------|
| 630                   | 31,342.03   | 28,092.11   | 25,454.77   | 24,373.38   | 109,262.29  |
| 631                   | 46,811.97   | 46,821.83   | 44,883.87   | 44,887.19   | 183,404.86  |
| 633                   | 15,611.13   | 14,769.09   | 14,080.28   | 13,333.02   | 57,793.53   |
| 634                   | 1,535.38    | 1,348.88    | 1,332.40    | 1,306.15    | 5,522.81    |
| 635                   | 2,225.57    | 2,001.59    | 1,915.89    | 1,729.12    | 7,872.17    |
| 636                   | 9,663.57    | 8,246.48    | 7,752.95    | 7,226.72    | 32,889.72   |
| 637                   | 4,792.24    | 4,000.65    | 3,723.52    | 3,472.10    | 15,988.51   |
| 638                   | 4,962.54    | 4,455.21    | 3,943.48    | 4,002.77    | 17,363.99   |
| 639                   | 2,403.99    | 2,266.99    | 2,264.86    | 2,154.92    | 9,090.76    |
| 640                   | 22,969.19   | 21,684.13   | 20,970.75   | 20,758.39   | 86,382.46   |
| 641                   | 20,159.77   | 18,908.69   | 17,769.25   | 17,357.08   | 74,194.80   |
| 644                   | 2,062.86    | 1,925.21    | 1,790.98    | 1,497.91    | 7,276.96    |
| 645                   | 4,985.69    | 4,782.65    | 4,279.71    | 3,950.86    | 17,998.90   |
| 646                   | 2,273.30    | 2,099.80    | 1,860.62    | 1,700.18    | 7,933.89    |
| 647                   | 4,772.17    | 4,472.98    | 4,526.24    | 4,547.72    | 18,319.11   |
| 648                   | 10,573.73   | 9,632.79    | 9,498.23    | 8,785.76    | 38,490.52   |
| 650                   | 3,804.27    | 3,530.65    | 3,248.39    | 3,085.25    | 13,668.57   |
| 651                   | 1,787.07    | 1,601.10    | 1,681.32    | 1,716.83    | 6,786.33    |
| 652                   | 10,075.57   | 9,969.18    | 9,784.92    | 9,983.76    | 39,813.43   |

|                              |                   |                   |                   |                   |                   |
|------------------------------|-------------------|-------------------|-------------------|-------------------|-------------------|
| 653                          | 3,328.67          | 3,302.32          | 3,035.07          | 3,068.66          | <b>12,734.72</b>  |
| 654                          | 5,360.37          | 4,986.17          | 4,491.98          | 4,209.38          | <b>19,047.91</b>  |
| 655                          | 6,996.72          | 6,258.94          | 5,965.89          | 5,992.33          | <b>25,213.88</b>  |
| 656                          | 10,569.69         | 9,852.69          | 9,165.92          | 9,179.08          | <b>38,767.38</b>  |
| 657                          | 14,036.31         | 13,201.29         | 12,757.20         | 12,421.73         | <b>52,416.54</b>  |
| 658                          | 15,192.80         | 14,316.90         | 14,024.13         | 13,138.93         | <b>56,672.75</b>  |
| <b>MO - MISSOURI - Total</b> | <b>258,296.60</b> | <b>242,528.32</b> | <b>230,202.63</b> | <b>223,879.23</b> | <b>954,906.78</b> |

**STATE: MS - MISSISSIPPI**

| REGISTRANT ZIP CODE 3           | 1ST QUARTER      | 2ND QUARTER      | 3RD QUARTER      | 4TH QUARTER      | TOTAL GRAMS       |
|---------------------------------|------------------|------------------|------------------|------------------|-------------------|
| 386                             | 13,315.82        | 12,921.26        | 13,019.98        | 12,655.48        | <b>51,912.53</b>  |
| 387                             | 1,540.55         | 1,526.34         | 1,530.57         | 1,539.71         | <b>6,137.16</b>   |
| 388                             | 8,665.68         | 8,388.70         | 8,494.66         | 7,908.57         | <b>33,457.61</b>  |
| 389                             | 1,562.73         | 1,531.70         | 1,466.02         | 1,475.06         | <b>6,035.51</b>   |
| 390                             | 5,169.41         | 5,101.85         | 4,885.86         | 4,681.99         | <b>19,839.12</b>  |
| 391                             | 4,472.01         | 4,431.01         | 4,268.93         | 4,278.84         | <b>17,450.80</b>  |
| 392                             | 5,722.10         | 5,970.43         | 5,900.84         | 5,571.13         | <b>23,164.50</b>  |
| 393                             | 5,743.87         | 5,395.06         | 5,264.02         | 5,016.54         | <b>21,419.49</b>  |
| 394                             | 19,325.49        | 18,204.52        | 17,920.84        | 17,571.13        | <b>73,021.98</b>  |
| 395                             | 20,877.15        | 19,959.32        | 18,736.36        | 18,260.34        | <b>77,833.18</b>  |
| 396                             | 4,189.73         | 4,123.92         | 4,022.12         | 3,881.27         | <b>16,217.05</b>  |
| 397                             | 3,021.45         | 2,798.57         | 3,056.17         | 2,809.99         | <b>11,686.18</b>  |
| <b>MS - MISSISSIPPI - Total</b> | <b>93,605.99</b> | <b>90,352.67</b> | <b>88,566.38</b> | <b>85,650.06</b> | <b>358,175.10</b> |

**STATE: MT - MONTANA**

| REGISTRANT ZIP CODE 3       | 1ST QUARTER      | 2ND QUARTER      | 3RD QUARTER      | 4TH QUARTER      | TOTAL GRAMS       |
|-----------------------------|------------------|------------------|------------------|------------------|-------------------|
| 590                         | 2,365.28         | 2,079.34         | 1,976.10         | 1,902.91         | <b>8,323.62</b>   |
| 591                         | 8,057.77         | 7,350.58         | 7,085.84         | 7,005.36         | <b>29,499.55</b>  |
| 592                         | 1,135.22         | 1,138.98         | 1,011.48         | 1,009.66         | <b>4,295.33</b>   |
| 593                         | 1,449.42         | 1,280.47         | 1,259.39         | 1,242.63         | <b>5,231.91</b>   |
| 594                         | 3,620.18         | 3,248.65         | 3,132.02         | 3,196.04         | <b>13,196.90</b>  |
| 595                         | 639.50           | 569.48           | 474.79           | 474.62           | <b>2,158.39</b>   |
| 596                         | 2,649.02         | 2,646.55         | 2,496.01         | 2,170.86         | <b>9,962.43</b>   |
| 597                         | 3,969.71         | 3,644.18         | 3,467.50         | 3,362.20         | <b>14,443.59</b>  |
| 598                         | 5,407.01         | 4,988.73         | 4,927.88         | 5,023.29         | <b>20,346.91</b>  |
| 599                         | 4,365.81         | 4,432.65         | 4,360.40         | 4,237.20         | <b>17,396.05</b>  |
| <b>MT - MONTANA - Total</b> | <b>33,658.91</b> | <b>31,379.60</b> | <b>30,191.39</b> | <b>29,624.77</b> | <b>124,854.68</b> |

**STATE: NC - NORTH CAROLINA**

| REGISTRANT ZIP CODE 3 | 1ST QUARTER | 2ND QUARTER | 3RD QUARTER | 4TH QUARTER | TOTAL GRAMS       |
|-----------------------|-------------|-------------|-------------|-------------|-------------------|
| 270                   | 14,517.08   | 13,431.92   | 13,015.07   | 13,650.61   | <b>54,614.68</b>  |
| 271                   | 10,647.46   | 9,690.58    | 9,527.41    | 9,841.12    | <b>39,706.58</b>  |
| 272                   | 30,521.47   | 29,192.18   | 28,338.54   | 29,456.76   | <b>117,508.94</b> |

|                                    |                   |                   |                   |                   |                     |
|------------------------------------|-------------------|-------------------|-------------------|-------------------|---------------------|
| 273                                | 21,442.05         | 20,626.42         | 20,404.48         | 22,646.28         | 85,119.23           |
| 274                                | 11,921.98         | 11,793.95         | 11,637.00         | 11,617.67         | 46,970.60           |
| 275                                | 45,232.87         | 43,351.54         | 42,602.48         | 45,294.21         | 176,481.11          |
| 276                                | 12,905.20         | 12,283.76         | 12,169.96         | 12,647.23         | 50,006.14           |
| 277                                | 13,490.27         | 12,855.81         | 12,521.82         | 11,821.79         | 50,689.70           |
| 278                                | 26,354.98         | 23,825.77         | 24,024.54         | 24,633.61         | 98,838.90           |
| 279                                | 11,464.93         | 10,743.31         | 10,822.34         | 11,812.99         | 44,843.58           |
| 280                                | 35,041.27         | 33,371.16         | 32,242.26         | 33,892.02         | 134,546.71          |
| 281                                | 25,798.57         | 25,275.14         | 24,679.51         | 25,602.14         | 101,355.36          |
| 282                                | 19,850.30         | 18,805.89         | 18,361.59         | 18,819.65         | 75,837.43           |
| 283                                | 68,882.21         | 66,333.45         | 64,903.06         | 69,778.16         | 269,896.89          |
| 284                                | 35,448.30         | 33,923.84         | 32,531.62         | 35,122.63         | 137,026.40          |
| 285                                | 29,701.06         | 28,010.89         | 26,707.74         | 27,648.74         | 112,068.44          |
| 286                                | 46,485.03         | 44,705.36         | 43,894.33         | 46,187.79         | 181,272.51          |
| 287                                | 25,736.89         | 24,526.64         | 23,460.56         | 23,844.12         | 97,568.22           |
| 288                                | 10,487.15         | 9,783.00          | 9,475.22          | 8,971.02          | 38,716.39           |
| 289                                | 3,513.19          | 3,462.79          | 3,236.67          | 3,212.03          | 13,424.68           |
| <b>NC - NORTH CAROLINA - Total</b> | <b>499,442.28</b> | <b>475,993.43</b> | <b>464,556.21</b> | <b>486,500.56</b> | <b>1,926,492.48</b> |

**STATE: ND - NORTH DAKOTA**

| REGISTRANT ZIP CODE 3            | 1ST QUARTER      | 2ND QUARTER      | 3RD QUARTER      | 4TH QUARTER      | TOTAL GRAMS      |
|----------------------------------|------------------|------------------|------------------|------------------|------------------|
| 580                              | 531.22           | 530.59           | 607.92           | 637.42           | 2,307.15         |
| 581                              | 2,260.23         | 2,002.90         | 2,001.41         | 2,006.71         | 8,271.26         |
| 582                              | 1,981.78         | 1,859.52         | 1,918.78         | 1,845.18         | 7,605.26         |
| 583                              | 1,153.14         | 1,137.78         | 1,085.14         | 1,106.51         | 4,482.56         |
| 584                              | 601.74           | 637.61           | 599.94           | 581.96           | 2,421.25         |
| 585                              | 3,846.84         | 3,792.06         | 3,671.08         | 3,634.15         | 14,944.13        |
| 586                              | 803.41           | 765.76           | 804.73           | 744.69           | 3,118.59         |
| 587                              | 1,078.76         | 1,131.11         | 1,088.25         | 1,027.81         | 4,325.94         |
| 588                              | 885.16           | 831.15           | 836.12           | 803.28           | 3,355.70         |
| <b>ND - NORTH DAKOTA - Total</b> | <b>13,142.28</b> | <b>12,688.48</b> | <b>12,613.37</b> | <b>12,387.71</b> | <b>50,831.84</b> |

**STATE: NE - NEBRASKA**

| REGISTRANT ZIP CODE 3 | 1ST QUARTER | 2ND QUARTER | 3RD QUARTER | 4TH QUARTER | TOTAL GRAMS |
|-----------------------|-------------|-------------|-------------|-------------|-------------|
| 680                   | 3,950.13    | 3,967.23    | 3,870.92    | 3,928.28    | 15,716.56   |
| 681                   | 16,629.72   | 16,103.94   | 15,499.01   | 15,375.74   | 63,608.40   |
| 683                   | 1,009.39    | 1,026.72    | 955.22      | 995.64      | 3,986.97    |
| 684                   | 891.98      | 919.45      | 851.19      | 1,030.70    | 3,693.32    |
| 685                   | 4,853.06    | 4,519.99    | 4,262.40    | 4,310.20    | 17,945.66   |
| 686                   | 599.46      | 581.60      | 552.87      | 459.96      | 2,193.89    |
| 687                   | 1,246.70    | 1,213.92    | 1,127.25    | 1,137.65    | 4,725.52    |
| 688                   | 2,813.68    | 2,775.37    | 2,722.55    | 2,635.45    | 10,947.05   |

|                              |                  |                  |                  |                  |                   |
|------------------------------|------------------|------------------|------------------|------------------|-------------------|
| 689                          | 1,161.85         | 1,220.98         | 1,186.19         | 1,106.08         | 4,675.10          |
| 690                          | 567.13           | 547.85           | 550.36           | 553.77           | 2,219.11          |
| 691                          | 1,669.18         | 1,691.36         | 1,611.62         | 1,586.45         | 6,558.61          |
| 692                          | 97.90            | 94.80            | 70.87            | 100.86           | 364.43            |
| 693                          | 1,884.93         | 1,811.59         | 1,693.27         | 1,636.50         | 7,026.30          |
| <b>NE - NEBRASKA - Total</b> | <b>37,375.11</b> | <b>36,474.80</b> | <b>34,953.72</b> | <b>34,857.29</b> | <b>143,660.91</b> |

**STATE: NH - NEW HAMPSHIRE**

| REGISTRANT ZIP CODE 3             | 1ST QUARTER      | 2ND QUARTER      | 3RD QUARTER      | 4TH QUARTER      | TOTAL GRAMS       |
|-----------------------------------|------------------|------------------|------------------|------------------|-------------------|
| 030                               | 12,830.71        | 12,463.81        | 11,835.77        | 11,847.31        | 48,977.60         |
| 031                               | 7,235.72         | 7,022.40         | 6,762.11         | 6,812.73         | 27,832.96         |
| 032                               | 6,047.66         | 5,777.77         | 5,230.39         | 5,343.99         | 22,399.81         |
| 033                               | 4,253.33         | 4,279.52         | 3,975.64         | 3,644.06         | 16,152.56         |
| 034                               | 2,463.89         | 2,349.95         | 2,267.98         | 2,186.16         | 9,267.97          |
| 035                               | 2,323.76         | 2,044.05         | 2,124.76         | 2,126.12         | 8,618.69          |
| 036                               | 254.61           | 238.47           | 241.38           | 229.06           | 963.51            |
| 037                               | 3,384.60         | 3,272.26         | 3,058.37         | 2,869.61         | 12,584.84         |
| 038                               | 16,691.75        | 15,415.13        | 14,448.58        | 13,359.98        | 59,915.44         |
| <b>NH - NEW HAMPSHIRE - Total</b> | <b>55,486.03</b> | <b>52,863.35</b> | <b>49,944.98</b> | <b>48,419.02</b> | <b>206,713.38</b> |

**STATE: NJ - NEW JERSEY**

| REGISTRANT ZIP CODE 3 | 1ST QUARTER | 2ND QUARTER | 3RD QUARTER | 4TH QUARTER | TOTAL GRAMS |
|-----------------------|-------------|-------------|-------------|-------------|-------------|
| 070                   | 61,555.63   | 60,159.87   | 58,094.91   | 56,617.77   | 236,428.18  |
| 071                   | 14,734.48   | 14,298.73   | 13,463.74   | 13,660.80   | 56,157.75   |
| 072                   | 5,330.55    | 5,158.27    | 5,219.90    | 5,112.48    | 20,821.20   |
| 073                   | 9,045.56    | 8,975.58    | 8,509.00    | 8,371.10    | 34,901.24   |
| 074                   | 18,899.71   | 18,579.88   | 17,467.45   | 17,075.23   | 72,022.27   |
| 075                   | 7,377.62    | 6,946.62    | 6,907.09    | 6,435.28    | 27,666.60   |
| 076                   | 21,915.87   | 21,478.70   | 21,188.92   | 21,689.73   | 86,273.23   |
| 077                   | 29,511.10   | 28,930.95   | 27,389.29   | 27,552.86   | 113,384.20  |
| 078                   | 11,974.63   | 11,865.43   | 11,743.34   | 11,600.77   | 47,184.17   |
| 079                   | 6,322.72    | 6,015.62    | 5,687.70    | 5,877.19    | 23,903.23   |
| 080                   | 95,462.88   | 92,023.81   | 88,502.61   | 86,144.85   | 362,134.15  |
| 081                   | 13,377.36   | 13,181.11   | 12,898.86   | 12,998.56   | 52,455.89   |
| 082                   | 20,554.65   | 18,667.77   | 18,236.44   | 17,693.87   | 75,152.72   |
| 083                   | 13,713.88   | 13,177.18   | 12,596.64   | 12,190.45   | 51,678.14   |
| 084                   | 3,012.87    | 3,001.06    | 3,372.68    | 3,422.69    | 12,809.31   |
| 085                   | 10,396.17   | 9,763.19    | 9,198.06    | 8,997.66    | 38,355.07   |
| 086                   | 12,650.37   | 12,507.25   | 12,144.80   | 12,422.40   | 49,724.83   |
| 087                   | 23,608.27   | 21,780.14   | 21,184.11   | 20,731.57   | 87,304.10   |
| 088                   | 42,702.85   | 40,904.24   | 39,587.57   | 38,503.75   | 161,698.41  |
| 089                   | 3,481.82    | 3,462.87    | 3,477.67    | 3,358.85    | 13,781.21   |

|                                |                   |                   |                   |                   |                     |
|--------------------------------|-------------------|-------------------|-------------------|-------------------|---------------------|
| <b>NJ - NEW JERSEY - Total</b> | <b>425,629.00</b> | <b>410,878.28</b> | <b>396,870.77</b> | <b>390,457.85</b> | <b>1,623,835.91</b> |
|--------------------------------|-------------------|-------------------|-------------------|-------------------|---------------------|

**STATE: NM - NEW MEXICO**

| REGISTRANT ZIP CODE 3          | 1ST QUARTER      | 2ND QUARTER      | 3RD QUARTER      | 4TH QUARTER      | TOTAL GRAMS       |
|--------------------------------|------------------|------------------|------------------|------------------|-------------------|
| 870                            | 7,860.56         | 7,478.63         | 7,507.52         | 7,278.87         | 30,125.59         |
| 871                            | 37,404.17        | 35,771.43        | 35,009.40        | 34,001.96        | 142,186.96        |
| 873                            | 1,150.61         | 1,194.27         | 1,059.71         | 1,074.74         | 4,479.33          |
| 874                            | 2,401.77         | 2,338.31         | 2,449.42         | 2,286.17         | 9,475.66          |
| 875                            | 13,232.81        | 13,654.66        | 12,937.98        | 12,953.05        | 52,778.49         |
| 877                            | 1,688.42         | 1,655.25         | 1,642.17         | 1,550.90         | 6,536.75          |
| 878                            | 659.38           | 549.51           | 555.16           | 588.78           | 2,352.82          |
| 879                            | 426.24           | 430.54           | 422.43           | 384.37           | 1,663.59          |
| 880                            | 5,178.52         | 5,380.68         | 4,980.79         | 4,936.53         | 20,476.53         |
| 881                            | 1,070.06         | 1,007.76         | 972.75           | 906.17           | 3,956.73          |
| 882                            | 7,011.80         | 6,639.28         | 6,612.04         | 6,558.76         | 26,821.88         |
| 883                            | 2,633.42         | 2,371.25         | 2,373.70         | 2,241.88         | 9,620.25          |
| 884                            | 169.75           | 156.44           | 157.14           | 165.18           | 648.51            |
| <b>NM - NEW MEXICO - Total</b> | <b>80,887.52</b> | <b>78,628.00</b> | <b>76,680.20</b> | <b>74,927.37</b> | <b>311,123.09</b> |

**STATE: NV - NEVADA**

| REGISTRANT ZIP CODE 3      | 1ST QUARTER       | 2ND QUARTER       | 3RD QUARTER       | 4TH QUARTER       | TOTAL GRAMS       |
|----------------------------|-------------------|-------------------|-------------------|-------------------|-------------------|
| 890                        | 37,030.34         | 35,249.18         | 33,507.71         | 33,968.78         | 139,756.01        |
| 891                        | 87,848.87         | 81,677.70         | 81,628.23         | 79,841.56         | 330,996.36        |
| 893                        | 486.12            | 502.17            | 451.39            | 412.39            | 1,852.07          |
| 894                        | 12,332.12         | 12,035.78         | 11,462.08         | 11,249.07         | 47,079.05         |
| 895                        | 14,448.01         | 13,566.55         | 13,029.06         | 12,481.58         | 53,525.19         |
| 897                        | 4,659.39          | 4,365.91          | 4,086.83          | 4,043.37          | 17,155.51         |
| 898                        | 1,145.57          | 1,137.09          | 1,156.83          | 1,140.31          | 4,579.81          |
| <b>NV - NEVADA - Total</b> | <b>157,950.42</b> | <b>148,534.39</b> | <b>145,322.13</b> | <b>143,137.06</b> | <b>594,943.99</b> |

**STATE: NY - NEW YORK**

| REGISTRANT ZIP CODE 3 | 1ST QUARTER | 2ND QUARTER | 3RD QUARTER | 4TH QUARTER | TOTAL GRAMS |
|-----------------------|-------------|-------------|-------------|-------------|-------------|
| 100                   | 62,452.44   | 60,439.06   | 57,381.26   | 54,232.50   | 234,505.26  |
| 101                   | 1,359.97    | 1,214.54    | 1,149.81    | 1,078.49    | 4,802.81    |
| 102                   | 75.07       | 59.65       | 57.83       | 46.19       | 238.73      |
| 103                   | 25,023.16   | 24,861.20   | 23,868.69   | 23,328.51   | 97,081.56   |
| 104                   | 49,151.44   | 47,895.48   | 47,471.59   | 44,761.11   | 189,279.63  |
| 105                   | 17,785.77   | 17,234.44   | 16,485.06   | 16,400.82   | 67,906.09   |
| 106                   | 2,823.16    | 2,805.41    | 2,776.43    | 2,102.30    | 10,507.30   |
| 107                   | 6,836.49    | 7,195.59    | 6,847.65    | 6,711.41    | 27,591.13   |
| 108                   | 1,944.06    | 1,848.13    | 1,852.49    | 1,822.64    | 7,467.32    |
| 109                   | 24,210.34   | 23,155.12   | 22,065.65   | 21,218.02   | 90,649.12   |
| 110                   | 10,629.19   | 10,470.90   | 10,074.05   | 10,215.03   | 41,389.17   |

|                              |                   |                   |                   |                   |                     |
|------------------------------|-------------------|-------------------|-------------------|-------------------|---------------------|
| 111                          | 7,130.19          | 7,522.77          | 7,084.97          | 6,550.54          | 28,288.47           |
| 112                          | 59,365.28         | 58,437.80         | 56,028.02         | 53,956.53         | 227,787.63          |
| 113                          | 24,095.14         | 23,534.28         | 22,186.19         | 21,132.27         | 90,947.88           |
| 114                          | 12,016.88         | 12,141.20         | 11,370.84         | 11,375.15         | 46,904.07           |
| 115                          | 26,006.43         | 25,971.37         | 25,169.53         | 24,649.62         | 101,796.95          |
| 116                          | 3,206.61          | 3,438.14          | 3,058.38          | 3,103.26          | 12,806.40           |
| 117                          | 78,777.81         | 77,482.88         | 73,985.18         | 74,140.22         | 304,386.09          |
| 118                          | 2,824.32          | 2,762.81          | 2,682.81          | 2,688.29          | 10,958.23           |
| 119                          | 8,715.29          | 8,940.77          | 8,478.97          | 8,325.51          | 34,460.54           |
| 120                          | 9,329.73          | 8,809.79          | 8,785.10          | 8,500.93          | 35,425.56           |
| 121                          | 5,436.10          | 5,149.94          | 5,167.67          | 5,141.04          | 20,894.75           |
| 122                          | 5,124.05          | 5,024.74          | 4,678.17          | 5,154.55          | 19,981.51           |
| 123                          | 2,774.11          | 2,709.66          | 2,417.94          | 2,477.07          | 10,378.78           |
| 124                          | 12,081.62         | 11,739.17         | 11,594.70         | 11,181.73         | 46,597.22           |
| 125                          | 20,542.00         | 20,295.80         | 18,659.70         | 19,203.76         | 78,701.27           |
| 126                          | 5,967.23          | 6,127.23          | 5,519.24          | 5,662.88          | 23,276.57           |
| 127                          | 9,064.88          | 8,493.71          | 8,138.56          | 7,544.02          | 33,241.17           |
| 128                          | 8,491.71          | 8,248.43          | 7,871.77          | 7,920.77          | 32,532.67           |
| 129                          | 5,791.89          | 5,707.78          | 5,847.12          | 5,791.88          | 23,138.67           |
| 130                          | 10,403.15         | 10,337.87         | 9,785.42          | 9,814.55          | 40,341.00           |
| 131                          | 2,952.17          | 3,011.51          | 2,827.85          | 2,797.26          | 11,588.79           |
| 132                          | 7,347.11          | 6,925.53          | 6,806.71          | 6,951.95          | 28,031.30           |
| 133                          | 3,111.63          | 3,133.51          | 2,972.29          | 2,779.41          | 11,996.85           |
| 134                          | 4,097.93          | 3,912.54          | 3,884.86          | 3,791.53          | 15,686.86           |
| 135                          | 1,827.31          | 1,746.96          | 1,662.95          | 1,524.40          | 6,761.62            |
| 136                          | 6,438.63          | 6,219.30          | 6,147.34          | 5,795.98          | 24,601.25           |
| 137                          | 4,307.03          | 4,014.32          | 3,607.92          | 3,718.97          | 15,648.24           |
| 138                          | 7,370.18          | 7,089.59          | 7,164.78          | 6,802.70          | 28,427.25           |
| 139                          | 4,627.85          | 4,253.03          | 3,776.97          | 3,651.32          | 16,309.16           |
| 140                          | 11,744.62         | 11,386.91         | 10,916.23         | 10,592.60         | 44,640.35           |
| 141                          | 5,092.70          | 5,316.39          | 5,372.35          | 5,054.28          | 20,835.72           |
| 142                          | 16,012.94         | 15,470.95         | 14,243.32         | 14,400.34         | 60,127.55           |
| 143                          | 1,935.29          | 2,078.09          | 2,017.59          | 1,975.52          | 8,006.49            |
| 144                          | 7,888.90          | 7,620.96          | 7,349.76          | 7,517.11          | 30,376.73           |
| 145                          | 6,673.03          | 6,566.72          | 6,320.62          | 6,244.29          | 25,804.67           |
| 146                          | 17,455.93         | 16,776.21         | 16,667.42         | 15,957.69         | 66,857.24           |
| 147                          | 3,544.63          | 3,507.62          | 3,302.11          | 3,005.38          | 13,359.74           |
| 148                          | 10,563.08         | 10,399.45         | 9,462.88          | 9,047.25          | 39,472.65           |
| 149                          | 3,285.00          | 3,124.71          | 2,893.15          | 2,921.01          | 12,223.87           |
| <b>NY - NEW YORK - Total</b> | <b>645,711.48</b> | <b>632,609.94</b> | <b>605,937.90</b> | <b>590,760.57</b> | <b>2,475,019.89</b> |



**STATE: OH - OHIO**

| REGISTRANT ZIP CODE 3    | 1ST QUARTER       | 2ND QUARTER       | 3RD QUARTER       | 4TH QUARTER       | TOTAL GRAMS         |
|--------------------------|-------------------|-------------------|-------------------|-------------------|---------------------|
| 430                      | 24,688.35         | 24,453.94         | 23,758.11         | 23,967.74         | 96,868.14           |
| 431                      | 18,802.60         | 18,298.60         | 18,154.91         | 17,931.27         | 73,187.38           |
| 432                      | 40,486.60         | 37,121.74         | 33,068.03         | 33,089.31         | 143,765.68          |
| 433                      | 6,130.31          | 6,168.41          | 5,990.35          | 5,833.78          | 24,122.84           |
| 434                      | 5,404.29          | 5,235.09          | 5,019.86          | 4,781.82          | 20,441.07           |
| 435                      | 7,582.00          | 7,567.42          | 7,258.95          | 7,188.75          | 29,597.12           |
| 436                      | 20,547.68         | 19,853.39         | 19,588.34         | 18,998.10         | 78,987.51           |
| 437                      | 9,151.85          | 8,890.28          | 8,314.91          | 8,264.18          | 34,621.22           |
| 438                      | 1,425.65          | 1,410.95          | 1,251.31          | 1,249.16          | 5,337.07            |
| 439                      | 9,078.86          | 8,526.43          | 8,132.10          | 7,914.85          | 33,652.25           |
| 440                      | 21,120.31         | 19,542.37         | 18,885.15         | 18,627.85         | 78,175.67           |
| 441                      | 30,740.19         | 29,506.84         | 28,316.49         | 28,194.83         | 116,758.36          |
| 442                      | 14,818.47         | 13,905.72         | 13,698.64         | 13,361.87         | 55,784.70           |
| 443                      | 10,385.57         | 9,958.17          | 9,636.76          | 9,292.18          | 39,272.68           |
| 444                      | 15,693.81         | 15,116.73         | 14,625.49         | 14,206.92         | 59,642.95           |
| 445                      | 7,646.81          | 7,160.16          | 6,989.53          | 6,942.27          | 28,738.77           |
| 446                      | 10,978.41         | 10,446.11         | 9,695.84          | 9,719.60          | 40,839.96           |
| 447                      | 6,737.26          | 6,388.51          | 6,290.55          | 6,184.73          | 25,601.05           |
| 448                      | 11,075.56         | 10,672.23         | 10,212.78         | 9,167.72          | 41,128.29           |
| 449                      | 2,679.27          | 2,741.76          | 2,711.48          | 2,618.11          | 10,750.61           |
| 450                      | 25,382.81         | 25,074.65         | 24,524.74         | 24,384.83         | 99,367.03           |
| 451                      | 12,871.94         | 12,711.03         | 12,435.29         | 12,420.61         | 50,438.88           |
| 452                      | 34,875.26         | 33,896.62         | 32,583.96         | 32,887.84         | 134,243.68          |
| 453                      | 11,728.08         | 12,014.06         | 11,583.84         | 11,819.92         | 47,145.89           |
| 454                      | 15,170.30         | 14,649.58         | 14,134.19         | 14,087.17         | 58,041.23           |
| 455                      | 5,086.75          | 5,014.50          | 5,064.14          | 5,106.09          | 20,271.49           |
| 456                      | 20,261.31         | 19,547.77         | 18,705.48         | 18,675.01         | 77,189.56           |
| 457                      | 5,646.90          | 5,361.11          | 5,207.47          | 5,211.59          | 21,427.07           |
| 458                      | 6,298.65          | 6,024.44          | 5,998.81          | 5,793.34          | 24,115.24           |
| <b>OH - OHIO - Total</b> | <b>412,495.88</b> | <b>397,258.59</b> | <b>381,837.49</b> | <b>377,921.46</b> | <b>1,569,513.43</b> |

**STATE: OK - OKLAHOMA**

| REGISTRANT ZIP CODE 3 | 1ST QUARTER | 2ND QUARTER | 3RD QUARTER | 4TH QUARTER | TOTAL GRAMS |
|-----------------------|-------------|-------------|-------------|-------------|-------------|
| 730                   | 33,784.25   | 32,591.03   | 30,094.75   | 27,248.83   | 123,718.86  |
| 731                   | 40,602.38   | 39,082.71   | 36,164.80   | 31,799.78   | 147,649.66  |
| 734                   | 4,787.66    | 4,516.56    | 3,927.76    | 3,538.44    | 16,770.41   |
| 735                   | 10,302.48   | 10,269.45   | 10,165.86   | 8,510.99    | 39,248.78   |
| 736                   | 2,621.81    | 2,618.80    | 2,381.23    | 2,119.52    | 9,741.36    |
| 737                   | 3,379.49    | 3,420.43    | 3,358.26    | 3,123.20    | 13,281.37   |

|                              |                   |                   |                   |                   |                   |
|------------------------------|-------------------|-------------------|-------------------|-------------------|-------------------|
| 738                          | 783.73            | 804.54            | 683.86            | 571.81            | 2,843.94          |
| 739                          | 169.87            | 180.42            | 134.21            | 164.87            | 649.37            |
| 740                          | 33,214.14         | 30,609.88         | 28,646.61         | 25,943.86         | 118,414.48        |
| 741                          | 22,394.42         | 21,452.56         | 20,453.18         | 18,878.14         | 83,178.30         |
| 743                          | 5,565.29          | 4,946.55          | 4,819.44          | 4,335.96          | 19,667.25         |
| 744                          | 16,370.93         | 15,344.73         | 14,898.63         | 12,987.72         | 59,602.02         |
| 745                          | 4,008.86          | 3,907.07          | 3,378.96          | 3,025.05          | 14,319.94         |
| 746                          | 2,620.89          | 2,804.63          | 2,139.07          | 1,883.18          | 9,447.77          |
| 747                          | 3,099.91          | 2,962.58          | 2,744.81          | 2,505.88          | 11,313.18         |
| 748                          | 9,247.98          | 9,105.19          | 8,685.77          | 7,691.08          | 34,730.01         |
| 749                          | 9,209.17          | 7,643.70          | 6,909.49          | 6,249.53          | 30,011.90         |
| <b>OK - OKLAHOMA - Total</b> | <b>202,163.26</b> | <b>192,260.83</b> | <b>179,586.69</b> | <b>160,577.83</b> | <b>734,588.62</b> |

**STATE: OR - OREGON**

| REGISTRANT ZIP CODE 3      | 1ST QUARTER       | 2ND QUARTER       | 3RD QUARTER       | 4TH QUARTER       | TOTAL GRAMS       |
|----------------------------|-------------------|-------------------|-------------------|-------------------|-------------------|
| 970                        | 25,799.20         | 25,305.72         | 24,809.39         | 23,728.59         | 99,642.90         |
| 971                        | 11,490.55         | 11,553.93         | 10,870.43         | 10,209.04         | 44,123.95         |
| 972                        | 31,585.87         | 30,646.00         | 29,588.04         | 29,594.28         | 121,414.20        |
| 973                        | 19,737.24         | 18,528.72         | 17,811.08         | 17,222.80         | 73,299.83         |
| 974                        | 29,148.00         | 28,323.54         | 26,840.59         | 25,469.40         | 109,781.52        |
| 975                        | 18,515.73         | 18,389.54         | 17,570.07         | 17,639.97         | 72,115.32         |
| 976                        | 2,328.42          | 2,318.14          | 2,114.33          | 1,949.99          | 8,710.87          |
| 977                        | 7,345.53          | 7,232.04          | 7,118.19          | 6,728.24          | 28,424.01         |
| 978                        | 6,027.05          | 5,620.26          | 5,312.50          | 5,264.43          | 22,224.24         |
| 979                        | 1,612.17          | 1,586.30          | 1,446.37          | 1,397.06          | 6,041.90          |
| <b>OR - OREGON - Total</b> | <b>153,589.77</b> | <b>149,504.19</b> | <b>143,480.99</b> | <b>139,203.81</b> | <b>585,778.76</b> |

**STATE: PA - PENNSYLVANIA**

| REGISTRANT ZIP CODE 3 | 1ST QUARTER | 2ND QUARTER | 3RD QUARTER | 4TH QUARTER | TOTAL GRAMS |
|-----------------------|-------------|-------------|-------------|-------------|-------------|
| 150                   | 23,722.70   | 23,090.41   | 21,797.18   | 21,310.70   | 89,921.00   |
| 151                   | 11,629.62   | 10,578.90   | 10,316.61   | 10,605.42   | 43,130.56   |
| 152                   | 30,480.88   | 29,068.66   | 27,862.13   | 27,570.57   | 114,982.24  |
| 153                   | 6,198.68    | 6,034.28    | 5,765.54    | 5,600.73    | 23,599.23   |
| 154                   | 9,727.85    | 9,633.26    | 9,553.30    | 9,203.47    | 38,117.87   |
| 155                   | 3,210.43    | 2,803.08    | 2,733.33    | 2,712.74    | 11,459.58   |
| 156                   | 13,591.07   | 13,009.79   | 12,116.32   | 11,746.43   | 50,463.62   |
| 157                   | 5,064.13    | 4,826.10    | 4,521.51    | 4,544.61    | 18,956.36   |
| 158                   | 4,080.12    | 4,024.53    | 3,997.52    | 3,856.96    | 15,959.13   |
| 159                   | 12,042.80   | 11,363.47   | 10,848.86   | 10,278.77   | 44,533.90   |
| 160                   | 6,989.27    | 6,926.16    | 6,546.53    | 6,291.41    | 26,753.36   |
| 161                   | 9,999.65    | 8,904.87    | 8,667.32    | 8,401.30    | 35,973.14   |
| 162                   | 3,480.44    | 3,408.44    | 3,193.89    | 3,039.71    | 13,122.48   |

|                                  |                   |                   |                   |                   |                     |
|----------------------------------|-------------------|-------------------|-------------------|-------------------|---------------------|
| 163                              | 6,664.89          | 6,507.96          | 6,145.56          | 5,967.68          | 25,286.09           |
| 164                              | 2,471.22          | 2,423.25          | 2,447.05          | 2,324.08          | 9,665.61            |
| 165                              | 4,921.82          | 4,756.50          | 4,742.92          | 4,592.23          | 19,013.47           |
| 166                              | 9,887.16          | 9,733.89          | 9,157.83          | 8,745.51          | 37,524.40           |
| 167                              | 1,581.43          | 1,526.32          | 1,548.67          | 1,479.05          | 6,135.48            |
| 168                              | 4,060.16          | 3,480.05          | 3,491.94          | 3,115.46          | 14,147.61           |
| 169                              | 2,194.04          | 2,066.38          | 1,918.67          | 1,872.36          | 8,051.45            |
| 170                              | 26,893.26         | 25,348.53         | 24,663.97         | 23,638.08         | 100,543.84          |
| 171                              | 7,858.12          | 7,289.95          | 6,784.51          | 6,459.62          | 28,392.20           |
| 172                              | 8,200.15          | 8,115.18          | 7,770.76          | 7,525.06          | 31,611.15           |
| 173                              | 11,270.62         | 10,972.32         | 10,434.61         | 10,272.81         | 42,950.37           |
| 174                              | 6,590.69          | 6,460.82          | 6,008.83          | 5,974.21          | 25,034.55           |
| 175                              | 10,295.38         | 9,591.60          | 9,404.93          | 8,974.53          | 38,266.45           |
| 176                              | 8,173.49          | 7,652.58          | 7,526.91          | 7,095.60          | 30,448.58           |
| 177                              | 7,014.29          | 6,613.36          | 6,634.06          | 6,335.47          | 26,597.18           |
| 178                              | 7,329.30          | 6,867.85          | 6,725.61          | 6,486.56          | 27,409.32           |
| 179                              | 5,258.24          | 4,916.34          | 4,696.18          | 4,379.67          | 19,250.44           |
| 180                              | 16,355.88         | 15,951.41         | 14,994.47         | 14,744.84         | 62,046.60           |
| 181                              | 9,578.52          | 9,397.39          | 8,833.21          | 8,886.31          | 36,695.43           |
| 182                              | 6,308.93          | 6,019.27          | 5,654.38          | 5,487.15          | 23,469.73           |
| 183                              | 9,788.71          | 9,804.73          | 9,251.80          | 9,034.66          | 37,879.89           |
| 184                              | 10,101.20         | 9,442.87          | 8,924.74          | 8,655.55          | 37,124.35           |
| 185                              | 11,890.39         | 11,030.50         | 10,232.84         | 9,781.90          | 42,935.64           |
| 186                              | 8,347.17          | 7,799.24          | 7,428.40          | 7,073.28          | 30,648.09           |
| 187                              | 27,456.40         | 26,749.36         | 24,148.02         | 24,018.28         | 102,372.06          |
| 188                              | 3,034.10          | 3,084.99          | 2,740.34          | 2,535.74          | 11,395.16           |
| 189                              | 15,471.08         | 15,488.84         | 14,465.72         | 14,213.49         | 59,639.13           |
| 190                              | 87,805.91         | 86,221.27         | 86,546.74         | 81,203.11         | 341,777.04          |
| 191                              | 117,559.28        | 114,324.22        | 108,369.36        | 105,048.18        | 445,301.04          |
| 193                              | 16,141.61         | 15,958.05         | 15,267.36         | 14,950.32         | 62,317.34           |
| 194                              | 25,222.67         | 23,825.33         | 22,392.74         | 21,825.72         | 93,266.46           |
| 195                              | 5,585.03          | 5,393.73          | 4,969.21          | 4,820.67          | 20,768.64           |
| 196                              | 7,738.70          | 7,518.82          | 6,912.25          | 6,751.92          | 28,921.69           |
| <b>PA - PENNSYLVANIA - Total</b> | <b>649,267.48</b> | <b>626,004.85</b> | <b>599,154.66</b> | <b>579,431.92</b> | <b>2,453,858.91</b> |

**STATE: PR - PUERTO RICO**

| REGISTRANT ZIP CODE 3           | 1ST QUARTER     | 2ND QUARTER     | 3RD QUARTER      | 4TH QUARTER      | TOTAL GRAMS      |
|---------------------------------|-----------------|-----------------|------------------|------------------|------------------|
| 006                             | 1,523.51        | 1,699.99        | 4,341.66         | 4,186.43         | 11,751.59        |
| 007                             | 2,254.20        | 2,178.05        | 4,566.55         | 4,572.82         | 13,571.62        |
| 009                             | 3,627.01        | 4,022.03        | 5,798.56         | 5,560.09         | 19,007.70        |
| <b>PR - PUERTO RICO - Total</b> | <b>7,404.73</b> | <b>7,900.07</b> | <b>14,706.77</b> | <b>14,319.35</b> | <b>44,330.91</b> |

**STATE: RI - RHODE ISLAND**

| REGISTRANT ZIP CODE 3            | 1ST QUARTER      | 2ND QUARTER      | 3RD QUARTER      | 4TH QUARTER      | TOTAL GRAMS       |
|----------------------------------|------------------|------------------|------------------|------------------|-------------------|
| 028                              | 21,673.83        | 20,218.35        | 19,454.50        | 19,547.41        | 80,894.10         |
| 029                              | 14,193.43        | 13,529.59        | 12,621.21        | 12,683.56        | 53,027.80         |
| <b>RI - RHODE ISLAND - Total</b> | <b>35,867.26</b> | <b>33,747.94</b> | <b>32,075.72</b> | <b>32,230.97</b> | <b>133,921.89</b> |

**STATE: SC - SOUTH CAROLINA**

| REGISTRANT ZIP CODE 3              | 1ST QUARTER       | 2ND QUARTER       | 3RD QUARTER       | 4TH QUARTER       | TOTAL GRAMS       |
|------------------------------------|-------------------|-------------------|-------------------|-------------------|-------------------|
| 290                                | 11,440.22         | 11,072.67         | 10,939.33         | 10,777.02         | 44,229.24         |
| 291                                | 14,009.46         | 13,922.53         | 13,063.63         | 13,151.19         | 54,146.80         |
| 292                                | 9,252.13          | 9,015.38          | 9,013.15          | 8,808.83          | 36,089.48         |
| 293                                | 23,725.59         | 21,428.91         | 20,153.90         | 19,125.44         | 84,433.83         |
| 294                                | 36,711.88         | 34,272.01         | 33,423.32         | 32,368.77         | 136,775.97        |
| 295                                | 47,616.54         | 44,743.13         | 42,806.05         | 43,481.62         | 178,647.33        |
| 296                                | 39,021.21         | 36,458.43         | 35,429.64         | 34,227.37         | 145,136.65        |
| 297                                | 9,607.17          | 8,949.68          | 8,418.13          | 8,736.22          | 35,711.20         |
| 298                                | 8,843.48          | 8,351.87          | 8,051.72          | 7,625.17          | 32,872.24         |
| 299                                | 6,583.61          | 6,557.74          | 6,650.28          | 6,479.97          | 26,271.60         |
| <b>SC - SOUTH CAROLINA - Total</b> | <b>206,811.28</b> | <b>194,772.35</b> | <b>187,949.15</b> | <b>184,781.57</b> | <b>774,314.35</b> |

**STATE: SD - SOUTH DAKOTA**

| REGISTRANT ZIP CODE 3            | 1ST QUARTER      | 2ND QUARTER      | 3RD QUARTER      | 4TH QUARTER      | TOTAL GRAMS      |
|----------------------------------|------------------|------------------|------------------|------------------|------------------|
| 570                              | 2,577.84         | 2,400.97         | 2,420.19         | 2,365.46         | 9,764.46         |
| 571                              | 4,801.78         | 4,752.14         | 4,266.07         | 4,172.98         | 17,992.97        |
| 572                              | 658.03           | 701.66           | 680.40           | 636.43           | 2,676.51         |
| 573                              | 885.83           | 812.34           | 797.03           | 780.76           | 3,275.96         |
| 574                              | 878.12           | 873.29           | 817.38           | 775.80           | 3,344.59         |
| 575                              | 655.39           | 624.41           | 616.12           | 532.75           | 2,428.66         |
| 576                              | 177.33           | 132.86           | 135.82           | 132.28           | 578.29           |
| 577                              | 4,582.00         | 4,189.99         | 4,007.81         | 3,800.26         | 16,580.07        |
| <b>SD - SOUTH DAKOTA - Total</b> | <b>15,216.32</b> | <b>14,487.66</b> | <b>13,740.82</b> | <b>13,196.71</b> | <b>56,641.51</b> |

**STATE: TN - TENNESSEE**

| REGISTRANT ZIP CODE 3 | 1ST QUARTER | 2ND QUARTER | 3RD QUARTER | 4TH QUARTER | TOTAL GRAMS |
|-----------------------|-------------|-------------|-------------|-------------|-------------|
| 370                   | 56,545.11   | 54,315.16   | 51,427.23   | 48,757.14   | 211,044.63  |
| 371                   | 43,686.24   | 42,368.14   | 41,225.90   | 40,244.76   | 167,525.04  |
| 372                   | 27,807.50   | 27,428.23   | 25,974.25   | 26,315.67   | 107,525.66  |
| 373                   | 40,621.03   | 38,628.14   | 36,949.93   | 36,936.88   | 153,135.98  |
| 374                   | 15,142.97   | 14,509.15   | 13,141.92   | 13,186.01   | 55,980.04   |
| 376                   | 34,084.11   | 33,234.77   | 31,791.06   | 30,630.22   | 129,740.17  |
| 377                   | 33,037.44   | 32,398.45   | 30,874.31   | 29,920.40   | 126,230.60  |
| 378                   | 44,679.20   | 43,376.02   | 40,148.89   | 39,056.26   | 167,260.38  |
| 379                   | 22,816.34   | 22,468.44   | 21,397.08   | 20,838.08   | 87,519.95   |

|                               |                   |                   |                   |                   |                     |
|-------------------------------|-------------------|-------------------|-------------------|-------------------|---------------------|
| 380                           | 14,327.47         | 13,846.13         | 12,890.19         | 12,574.77         | 53,638.56           |
| 381                           | 26,212.99         | 26,146.93         | 28,584.04         | 24,682.05         | 105,626.01          |
| 382                           | 7,252.93          | 6,779.23          | 6,321.60          | 5,853.48          | 26,207.23           |
| 383                           | 14,370.49         | 13,872.71         | 12,813.53         | 12,077.43         | 53,134.15           |
| 384                           | 12,974.14         | 13,069.77         | 12,632.69         | 12,711.46         | 51,388.06           |
| 385                           | 27,433.21         | 26,967.71         | 24,467.19         | 24,050.79         | 102,918.90          |
| <b>TN - TENNESSEE - Total</b> | <b>420,991.18</b> | <b>409,408.99</b> | <b>390,639.81</b> | <b>377,835.40</b> | <b>1,598,875.37</b> |

**STATE: TX - TEXAS**

| REGISTRANT ZIP CODE 3 | 1ST QUARTER | 2ND QUARTER | 3RD QUARTER | 4TH QUARTER | TOTAL GRAMS |
|-----------------------|-------------|-------------|-------------|-------------|-------------|
| 750                   | 33,365.25   | 31,958.30   | 31,100.89   | 30,798.82   | 127,223.26  |
| 751                   | 7,815.18    | 7,565.07    | 7,720.93    | 7,502.90    | 30,604.09   |
| 752                   | 9,958.25    | 9,510.31    | 8,802.27    | 8,806.43    | 37,077.27   |
| 753                   | 185.40      | 213.23      | 154.52      | 210.76      | 763.90      |
| 754                   | 4,765.86    | 4,496.82    | 4,270.45    | 4,285.95    | 17,819.08   |
| 755                   | 1,459.63    | 1,532.33    | 1,283.70    | 1,151.73    | 5,427.38    |
| 756                   | 2,692.04    | 2,797.66    | 2,436.94    | 2,492.72    | 10,419.37   |
| 757                   | 4,488.87    | 4,231.86    | 4,395.93    | 4,196.34    | 17,313.00   |
| 758                   | 838.32      | 792.66      | 769.76      | 722.61      | 3,123.35    |
| 759                   | 1,640.32    | 1,524.45    | 1,601.03    | 1,626.40    | 6,392.20    |
| 760                   | 24,107.86   | 22,534.57   | 21,361.60   | 21,163.23   | 89,167.26   |
| 761                   | 17,506.12   | 16,641.04   | 15,520.46   | 15,496.70   | 65,164.33   |
| 762                   | 7,931.28    | 7,542.92    | 7,256.46    | 7,227.25    | 29,957.91   |
| 763                   | 2,388.69    | 2,538.36    | 2,564.37    | 2,279.81    | 9,771.23    |
| 764                   | 1,294.72    | 1,255.29    | 1,243.80    | 1,235.93    | 5,029.74    |
| 765                   | 5,838.69    | 5,446.36    | 5,262.79    | 4,467.31    | 21,015.16   |
| 766                   | 1,488.93    | 1,367.60    | 1,298.45    | 1,300.76    | 5,455.74    |
| 767                   | 2,252.01    | 2,294.09    | 2,139.15    | 2,259.70    | 8,944.95    |
| 768                   | 875.70      | 891.36      | 890.77      | 837.12      | 3,494.95    |
| 769                   | 870.81      | 858.29      | 860.38      | 790.22      | 3,379.70    |
| 770                   | 46,528.58   | 50,396.22   | 46,338.29   | 48,181.48   | 191,444.57  |
| 773                   | 12,591.86   | 12,446.37   | 12,514.74   | 12,653.33   | 50,206.30   |
| 774                   | 14,655.29   | 14,823.63   | 15,290.06   | 17,801.81   | 62,570.78   |
| 775                   | 12,145.65   | 12,931.38   | 13,351.58   | 14,383.86   | 52,812.47   |
| 776                   | 2,507.08    | 2,232.95    | 2,381.25    | 2,306.71    | 9,427.99    |
| 777                   | 983.37      | 836.39      | 1,064.23    | 1,121.81    | 4,005.80    |
| 778                   | 1,195.87    | 1,211.44    | 1,161.97    | 1,151.16    | 4,720.44    |
| 779                   | 3,097.54    | 3,074.43    | 3,302.80    | 3,145.97    | 12,620.73   |
| 780                   | 3,266.38    | 3,121.63    | 3,069.11    | 2,752.91    | 12,210.03   |
| 781                   | 3,711.70    | 3,742.29    | 3,543.18    | 3,163.71    | 14,160.87   |
| 782                   | 21,444.39   | 20,386.68   | 18,676.44   | 17,362.05   | 77,869.55   |

|                           |                   |                   |                   |                   |                     |
|---------------------------|-------------------|-------------------|-------------------|-------------------|---------------------|
| 783                       | 1,112.82          | 1,039.57          | 1,090.45          | 1,111.10          | 4,353.94            |
| 784                       | 1,678.71          | 1,581.83          | 1,523.45          | 1,591.72          | 6,375.71            |
| 785                       | 2,882.42          | 2,789.01          | 2,680.02          | 2,735.74          | 11,087.19           |
| 786                       | 16,572.71         | 16,112.75         | 14,357.97         | 13,364.24         | 60,407.68           |
| 787                       | 13,477.69         | 13,430.46         | 11,784.96         | 11,392.41         | 50,085.51           |
| 788                       | 541.39            | 494.45            | 517.99            | 411.30            | 1,965.13            |
| 789                       | 653.28            | 628.59            | 625.95            | 605.85            | 2,513.67            |
| 790                       | 1,203.16          | 1,197.82          | 1,081.48          | 1,004.54          | 4,487.01            |
| 791                       | 2,734.36          | 2,893.19          | 2,574.50          | 2,789.73          | 10,991.77           |
| 792                       | 354.99            | 305.21            | 266.62            | 290.82            | 1,217.65            |
| 793                       | 621.90            | 713.75            | 641.74            | 639.76            | 2,617.15            |
| 794                       | 2,547.36          | 2,389.88          | 2,265.42          | 2,225.97          | 9,428.64            |
| 795                       | 618.72            | 488.91            | 583.79            | 575.24            | 2,266.65            |
| 796                       | 1,440.94          | 1,382.91          | 1,320.70          | 1,190.55          | 5,335.10            |
| 797                       | 3,235.86          | 3,085.52          | 2,996.74          | 2,844.55          | 12,162.67           |
| 798                       | 144.36            | 127.11            | 141.00            | 129.81            | 542.29              |
| 799                       | 4,205.07          | 4,006.90          | 4,269.26          | 3,444.15          | 15,925.38           |
| <b>TX - TEXAS - Total</b> | <b>307,917.35</b> | <b>303,863.86</b> | <b>290,350.34</b> | <b>289,225.01</b> | <b>1,191,356.55</b> |

**STATE: UT - UTAH**

| REGISTRANT ZIP CODE 3    | 1ST QUARTER       | 2ND QUARTER       | 3RD QUARTER       | 4TH QUARTER       | TOTAL GRAMS       |
|--------------------------|-------------------|-------------------|-------------------|-------------------|-------------------|
| 840                      | 61,224.59         | 59,003.41         | 57,919.53         | 57,502.58         | 235,650.12        |
| 841                      | 39,631.29         | 37,713.21         | 36,511.80         | 35,365.46         | 149,221.77        |
| 843                      | 4,878.42          | 4,740.59          | 4,730.53          | 4,738.55          | 19,088.10         |
| 844                      | 13,125.81         | 12,427.74         | 12,401.89         | 12,217.25         | 50,172.68         |
| 845                      | 4,803.31          | 4,820.83          | 4,480.72          | 4,605.21          | 18,710.07         |
| 846                      | 12,242.06         | 11,566.84         | 11,482.17         | 11,212.32         | 46,503.39         |
| 847                      | 17,090.44         | 16,896.91         | 16,805.65         | 16,565.69         | 67,358.69         |
| <b>UT - UTAH - Total</b> | <b>152,995.93</b> | <b>147,169.53</b> | <b>144,332.30</b> | <b>142,207.06</b> | <b>586,704.81</b> |

**STATE: VA - VIRGINIA**

| REGISTRANT ZIP CODE 3 | 1ST QUARTER | 2ND QUARTER | 3RD QUARTER | 4TH QUARTER | TOTAL GRAMS |
|-----------------------|-------------|-------------|-------------|-------------|-------------|
| 201                   | 17,248.15   | 17,738.14   | 16,825.83   | 17,087.91   | 68,900.03   |
| 220                   | 10,023.86   | 9,595.57    | 9,488.60    | 8,992.98    | 38,101.00   |
| 221                   | 9,343.45    | 9,150.28    | 9,246.16    | 9,156.36    | 36,896.24   |
| 222                   | 2,857.56    | 2,927.39    | 2,809.37    | 2,726.07    | 11,320.38   |
| 223                   | 5,120.26    | 5,154.36    | 4,772.89    | 4,744.95    | 19,792.46   |
| 224                   | 8,593.37    | 8,007.64    | 7,789.40    | 7,562.07    | 31,952.48   |
| 225                   | 3,384.06    | 3,106.79    | 3,237.26    | 3,242.63    | 12,970.74   |
| 226                   | 8,287.14    | 7,983.41    | 7,690.13    | 7,250.38    | 31,211.06   |
| 227                   | 1,693.85    | 1,702.40    | 1,666.58    | 1,761.82    | 6,824.65    |
| 228                   | 4,797.05    | 4,877.63    | 4,889.04    | 4,779.30    | 19,343.02   |

|                              |                   |                   |                   |                   |                     |
|------------------------------|-------------------|-------------------|-------------------|-------------------|---------------------|
| 229                          | 7,981.94          | 7,441.66          | 7,427.43          | 7,185.61          | 30,036.64           |
| 230                          | 5,402.89          | 5,279.29          | 5,286.94          | 5,196.64          | 21,165.76           |
| 231                          | 11,246.44         | 10,566.97         | 9,653.25          | 9,802.41          | 41,269.07           |
| 232                          | 21,870.63         | 20,237.99         | 19,972.18         | 19,520.36         | 81,601.16           |
| 233                          | 8,425.37          | 8,461.08          | 8,040.68          | 7,777.28          | 32,704.41           |
| 234                          | 17,477.28         | 17,111.75         | 15,841.75         | 15,382.40         | 65,813.18           |
| 235                          | 6,665.22          | 6,062.30          | 5,831.27          | 5,751.47          | 24,310.27           |
| 236                          | 10,458.07         | 9,979.34          | 9,886.19          | 9,239.94          | 39,563.54           |
| 237                          | 5,340.53          | 4,678.98          | 4,757.25          | 4,424.27          | 19,201.03           |
| 238                          | 14,892.35         | 14,443.32         | 14,287.26         | 15,315.50         | 58,938.43           |
| 239                          | 2,462.24          | 2,446.57          | 2,322.29          | 2,343.99          | 9,575.09            |
| 240                          | 15,732.51         | 15,303.55         | 14,970.90         | 15,151.19         | 61,158.14           |
| 241                          | 14,329.94         | 13,570.39         | 13,178.18         | 13,488.95         | 54,567.47           |
| 242                          | 19,962.60         | 19,253.76         | 18,534.21         | 18,912.38         | 76,662.94           |
| 243                          | 7,921.17          | 7,693.45          | 7,607.83          | 8,097.19          | 31,319.63           |
| 244                          | 4,143.90          | 4,024.55          | 3,905.27          | 3,862.25          | 15,935.97           |
| 245                          | 11,558.39         | 11,147.87         | 11,010.65         | 10,851.43         | 44,568.34           |
| 246                          | 5,304.21          | 4,877.53          | 4,618.02          | 4,689.58          | 19,489.35           |
| <b>VA - VIRGINIA - Total</b> | <b>262,524.42</b> | <b>252,823.97</b> | <b>245,546.79</b> | <b>244,297.29</b> | <b>1,005,192.47</b> |

**STATE: VI - VIRGIN ISLANDS**

| REGISTRANT ZIP CODE 3              | 1ST QUARTER   | 2ND QUARTER   | 3RD QUARTER   | 4TH QUARTER   | TOTAL GRAMS     |
|------------------------------------|---------------|---------------|---------------|---------------|-----------------|
| 008                                | 463.94        | 480.43        | 394.91        | 413.29        | 1,752.57        |
| <b>VI - VIRGIN ISLANDS - Total</b> | <b>463.94</b> | <b>480.43</b> | <b>394.91</b> | <b>413.29</b> | <b>1,752.57</b> |

**STATE: VT - VERMONT**

| REGISTRANT ZIP CODE 3       | 1ST QUARTER      | 2ND QUARTER      | 3RD QUARTER      | 4TH QUARTER      | TOTAL GRAMS      |
|-----------------------------|------------------|------------------|------------------|------------------|------------------|
| 050                         | 1,824.90         | 1,941.17         | 1,737.97         | 1,628.37         | 7,132.42         |
| 051                         | 1,622.42         | 1,479.92         | 1,501.34         | 1,460.16         | 6,063.84         |
| 052                         | 1,165.15         | 1,160.78         | 1,209.62         | 1,094.30         | 4,629.85         |
| 053                         | 1,467.67         | 1,559.32         | 1,551.50         | 1,423.89         | 6,002.38         |
| 054                         | 9,252.65         | 8,721.03         | 8,300.89         | 8,184.29         | 34,458.84        |
| 056                         | 1,916.40         | 1,866.31         | 1,804.41         | 1,721.56         | 7,308.68         |
| 057                         | 1,807.96         | 1,675.85         | 1,533.78         | 1,602.55         | 6,620.15         |
| 058                         | 1,784.37         | 1,619.75         | 1,693.14         | 1,704.84         | 6,802.09         |
| <b>VT - VERMONT - Total</b> | <b>20,841.53</b> | <b>20,024.13</b> | <b>19,332.64</b> | <b>18,819.96</b> | <b>79,018.26</b> |

**STATE: WA - WASHINGTON**

| REGISTRANT ZIP CODE 3 | 1ST QUARTER | 2ND QUARTER | 3RD QUARTER | 4TH QUARTER | TOTAL GRAMS |
|-----------------------|-------------|-------------|-------------|-------------|-------------|
| 980                   | 43,903.02   | 43,249.32   | 41,153.86   | 41,090.48   | 169,396.68  |
| 981                   | 28,299.31   | 26,618.30   | 26,144.51   | 26,037.17   | 107,099.29  |
| 982                   | 34,718.88   | 33,395.09   | 33,290.16   | 31,918.25   | 133,322.38  |
| 983                   | 30,509.47   | 29,908.79   | 28,476.16   | 27,988.08   | 116,882.49  |

|                                |                   |                   |                   |                   |                   |
|--------------------------------|-------------------|-------------------|-------------------|-------------------|-------------------|
| 984                            | 21,847.83         | 20,838.68         | 19,879.95         | 19,300.27         | 81,866.74         |
| 985                            | 17,029.56         | 16,967.22         | 16,484.26         | 16,050.83         | 66,531.87         |
| 986                            | 25,897.21         | 25,182.83         | 25,098.42         | 24,083.53         | 100,261.99        |
| 988                            | 8,082.40          | 8,050.45          | 7,553.16          | 7,513.00          | 31,199.01         |
| 989                            | 9,656.94          | 9,708.96          | 9,337.24          | 9,001.06          | 37,704.20         |
| 990                            | 2,817.79          | 2,676.19          | 2,690.37          | 2,750.30          | 10,934.65         |
| 991                            | 4,523.91          | 4,350.18          | 4,301.32          | 4,119.03          | 17,294.44         |
| 992                            | 16,184.73         | 16,291.36         | 14,872.59         | 14,571.37         | 61,920.05         |
| 993                            | 13,686.14         | 12,985.49         | 12,156.01         | 12,152.65         | 50,980.30         |
| 994                            | 1,059.94          | 1,186.32          | 1,003.84          | 1,098.41          | 4,348.52          |
| <b>WA - WASHINGTON - Total</b> | <b>258,217.13</b> | <b>251,409.19</b> | <b>242,441.87</b> | <b>237,674.43</b> | <b>989,742.63</b> |

**STATE: WI - WISCONSIN**

| REGISTRANT ZIP CODE 3         | 1ST QUARTER       | 2ND QUARTER       | 3RD QUARTER       | 4TH QUARTER       | TOTAL GRAMS       |
|-------------------------------|-------------------|-------------------|-------------------|-------------------|-------------------|
| 530                           | 19,322.95         | 18,062.30         | 17,151.97         | 16,721.60         | 71,258.82         |
| 531                           | 23,321.77         | 21,506.57         | 19,554.20         | 18,461.18         | 82,843.72         |
| 532                           | 55,875.88         | 50,681.22         | 46,883.57         | 45,020.66         | 198,461.33        |
| 534                           | 4,592.85          | 4,208.28          | 4,253.03          | 4,170.42          | 17,224.58         |
| 535                           | 14,775.15         | 14,030.78         | 13,491.09         | 12,912.00         | 55,209.02         |
| 537                           | 11,128.28         | 10,335.65         | 10,069.81         | 9,725.74          | 41,259.48         |
| 538                           | 983.21            | 885.79            | 917.63            | 992.00            | 3,778.63          |
| 539                           | 5,737.57          | 5,580.19          | 5,483.87          | 5,170.20          | 21,971.84         |
| 540                           | 2,763.24          | 2,864.80          | 2,582.59          | 2,679.70          | 10,890.33         |
| 541                           | 3,136.02          | 2,979.30          | 2,913.41          | 2,810.42          | 11,839.16         |
| 542                           | 1,832.27          | 1,769.62          | 1,834.01          | 1,623.85          | 7,059.75          |
| 543                           | 3,530.80          | 3,406.39          | 3,155.52          | 3,294.18          | 13,386.90         |
| 544                           | 6,504.04          | 6,124.10          | 5,956.36          | 5,682.19          | 24,266.69         |
| 545                           | 2,386.22          | 2,387.35          | 2,104.86          | 1,945.11          | 8,823.53          |
| 546                           | 5,812.57          | 5,593.57          | 5,355.91          | 5,326.27          | 22,088.32         |
| 547                           | 3,657.99          | 3,464.88          | 3,353.04          | 3,197.26          | 13,673.17         |
| 548                           | 3,999.33          | 3,927.25          | 4,076.95          | 3,865.96          | 15,869.49         |
| 549                           | 10,315.70         | 9,778.29          | 9,494.85          | 9,218.47          | 38,807.31         |
| <b>WI - WISCONSIN - Total</b> | <b>179,675.85</b> | <b>167,586.32</b> | <b>158,632.67</b> | <b>152,817.21</b> | <b>658,712.06</b> |

**STATE: WV - WEST VIRGINIA**

| REGISTRANT ZIP CODE 3 | 1ST QUARTER | 2ND QUARTER | 3RD QUARTER | 4TH QUARTER | TOTAL GRAMS |
|-----------------------|-------------|-------------|-------------|-------------|-------------|
| 247                   | 2,598.98    | 2,485.67    | 2,074.54    | 1,979.05    | 9,138.24    |
| 248                   | 1,272.45    | 1,337.54    | 1,300.95    | 1,246.43    | 5,157.37    |
| 249                   | 1,931.24    | 1,979.32    | 1,795.09    | 1,696.35    | 7,402.00    |
| 250                   | 1,864.09    | 1,840.46    | 1,737.43    | 1,632.32    | 7,074.30    |
| 251                   | 1,284.86    | 1,450.25    | 1,404.68    | 1,455.11    | 5,594.91    |
| 252                   | 1,544.13    | 1,171.15    | 949.67      | 975.81      | 4,640.76    |



|                                   |                  |                  |                  |                  |                   |
|-----------------------------------|------------------|------------------|------------------|------------------|-------------------|
| 253                               | 6,160.04         | 5,394.28         | 5,074.23         | 4,363.78         | 20,992.34         |
| 254                               | 12,429.48        | 11,476.63        | 11,011.46        | 10,534.09        | 45,451.65         |
| 255                               | 4,661.51         | 4,445.50         | 4,165.39         | 4,330.73         | 17,603.14         |
| 256                               | 1,476.59         | 1,237.32         | 1,253.73         | 1,300.99         | 5,268.64          |
| 257                               | 3,435.84         | 3,333.00         | 3,301.67         | 3,237.96         | 13,308.47         |
| 258                               | 3,402.06         | 3,020.89         | 2,817.65         | 2,364.15         | 11,604.75         |
| 259                               | 1,479.76         | 1,170.66         | 1,206.82         | 1,197.53         | 5,054.76          |
| 260                               | 8,080.10         | 7,351.32         | 7,127.56         | 6,861.64         | 29,420.62         |
| 261                               | 2,887.49         | 2,447.02         | 2,202.67         | 2,142.66         | 9,679.85          |
| 262                               | 2,201.62         | 2,180.97         | 2,129.91         | 1,913.94         | 8,426.44          |
| 263                               | 4,198.26         | 4,082.66         | 4,022.78         | 3,814.48         | 16,118.19         |
| 264                               | 1,367.19         | 1,269.90         | 1,239.77         | 1,137.66         | 5,014.52          |
| 265                               | 6,227.53         | 5,809.95         | 5,360.66         | 5,117.99         | 22,516.12         |
| 266                               | 1,308.78         | 1,227.98         | 1,098.69         | 933.18           | 4,568.64          |
| 267                               | 1,841.14         | 2,154.01         | 1,929.05         | 2,051.11         | 7,975.30          |
| 268                               | 595.56           | 604.06           | 578.03           | 545.80           | 2,323.44          |
| <b>WV - WEST VIRGINIA - Total</b> | <b>72,248.71</b> | <b>67,470.52</b> | <b>63,782.46</b> | <b>60,832.77</b> | <b>264,334.46</b> |

**STATE: WY - WYOMING**

| REGISTRANT ZIP CODE 3       | 1ST QUARTER      | 2ND QUARTER      | 3RD QUARTER      | 4TH QUARTER      | TOTAL GRAMS      |
|-----------------------------|------------------|------------------|------------------|------------------|------------------|
| 820                         | 4,547.70         | 4,458.90         | 4,239.01         | 3,928.65         | 17,174.25        |
| 822                         | 580.75           | 546.46           | 507.78           | 685.73           | 2,320.73         |
| 823                         | 332.56           | 357.83           | 357.42           | 372.69           | 1,420.50         |
| 824                         | 2,817.29         | 2,657.31         | 2,602.77         | 2,654.85         | 10,732.22        |
| 825                         | 2,172.65         | 1,736.53         | 1,772.31         | 1,832.52         | 7,513.99         |
| 826                         | 4,361.07         | 4,231.51         | 4,065.71         | 4,228.93         | 16,887.22        |
| 827                         | 1,119.12         | 1,060.07         | 993.11           | 981.64           | 4,153.94         |
| 828                         | 1,356.35         | 1,308.24         | 1,163.56         | 1,139.08         | 4,967.23         |
| 829                         | 5,733.66         | 5,688.87         | 5,434.99         | 5,519.40         | 22,376.93        |
| 830                         | 214.76           | 170.34           | 208.80           | 198.09           | 791.99           |
| 831                         | 724.87           | 646.47           | 617.46           | 577.66           | 2,566.46         |
| <b>WY - WYOMING - Total</b> | <b>23,960.77</b> | <b>22,862.52</b> | <b>21,962.93</b> | <b>22,119.24</b> | <b>90,905.46</b> |

**DRUG: 9150 - HYDROMORPHONE****STATE: AK - ALASKA**

| REGISTRANT ZIP CODE 3      | 1ST QUARTER   | 2ND QUARTER   | 3RD QUARTER   | 4TH QUARTER   | TOTAL GRAMS     |
|----------------------------|---------------|---------------|---------------|---------------|-----------------|
| 995                        | 503.46        | 381.71        | 402.40        | 358.59        | 1,646.17        |
| 996                        | 360.52        | 296.20        | 298.56        | 210.99        | 1,166.26        |
| 997                        | 42.83         | 47.22         | 35.49         | 31.27         | 156.80          |
| 998                        | 44.26         | 25.14         | 16.55         | 14.86         | 100.82          |
| 999                        | 7.11          | 6.63          | 13.25         | 6.30          | 33.30           |
| <b>AK - ALASKA - Total</b> | <b>958.18</b> | <b>756.91</b> | <b>766.25</b> | <b>622.01</b> | <b>3,103.34</b> |

**STATE: AL - ALABAMA**

| REGISTRANT ZIP CODE 3       | 1ST QUARTER     | 2ND QUARTER     | 3RD QUARTER     | 4TH QUARTER     | TOTAL GRAMS      |
|-----------------------------|-----------------|-----------------|-----------------|-----------------|------------------|
| 350                         | 201.26          | 154.00          | 157.71          | 130.01          | 642.98           |
| 351                         | 125.40          | 118.78          | 106.19          | 95.55           | 445.93           |
| 352                         | 324.30          | 260.59          | 298.57          | 307.47          | 1,190.93         |
| 354                         | 101.50          | 124.82          | 107.98          | 110.52          | 444.81           |
| 355                         | 57.80           | 44.69           | 41.41           | 35.12           | 179.01           |
| 356                         | 148.40          | 168.83          | 149.01          | 146.86          | 613.10           |
| 357                         | 107.12          | 93.87           | 91.26           | 84.80           | 377.06           |
| 358                         | 219.61          | 222.90          | 243.40          | 183.33          | 869.25           |
| 359                         | 119.56          | 125.86          | 123.00          | 97.67           | 466.08           |
| 360                         | 131.63          | 145.41          | 120.98          | 109.67          | 507.70           |
| 361                         | 115.64          | 127.57          | 113.15          | 131.71          | 488.07           |
| 362                         | 81.26           | 73.22           | 65.41           | 56.35           | 276.25           |
| 363                         | 190.67          | 172.77          | 219.34          | 158.18          | 740.96           |
| 364                         | 84.65           | 77.78           | 90.22           | 90.66           | 343.32           |
| 365                         | 367.50          | 509.20          | 275.97          | 246.29          | 1,398.97         |
| 366                         | 278.97          | 267.66          | 268.75          | 239.42          | 1,054.81         |
| 367                         | 18.22           | 22.33           | 16.54           | 16.86           | 73.95            |
| 368                         | 98.69           | 105.16          | 102.12          | 99.07           | 405.03           |
| 369                         | 5.14            | 6.38            | 6.36            | 5.41            | 23.29            |
| <b>AL - ALABAMA - Total</b> | <b>2,777.32</b> | <b>2,821.82</b> | <b>2,597.38</b> | <b>2,344.97</b> | <b>10,541.50</b> |

**STATE: AR - ARKANSAS**

| REGISTRANT ZIP CODE 3        | 1ST QUARTER     | 2ND QUARTER     | 3RD QUARTER     | 4TH QUARTER     | TOTAL GRAMS     |
|------------------------------|-----------------|-----------------|-----------------|-----------------|-----------------|
| 716                          | 51.54           | 51.01           | 36.39           | 39.16           | 178.10          |
| 717                          | 42.81           | 24.47           | 35.41           | 26.70           | 129.38          |
| 718                          | 88.42           | 71.43           | 69.38           | 74.10           | 303.32          |
| 719                          | 131.12          | 127.01          | 117.05          | 130.90          | 506.08          |
| 720                          | 250.55          | 222.72          | 196.39          | 184.02          | 853.69          |
| 721                          | 263.74          | 227.62          | 219.09          | 166.10          | 876.54          |
| 722                          | 433.34          | 404.79          | 307.70          | 279.86          | 1,425.69        |
| 723                          | 36.18           | 31.10           | 30.32           | 33.53           | 131.13          |
| 724                          | 154.56          | 118.04          | 110.13          | 123.84          | 506.57          |
| 725                          | 123.41          | 97.64           | 96.56           | 100.99          | 418.60          |
| 726                          | 116.87          | 117.78          | 111.72          | 105.39          | 451.77          |
| 727                          | 700.41          | 623.74          | 642.90          | 647.19          | 2,614.24        |
| 728                          | 85.02           | 84.28           | 75.41           | 61.53           | 306.24          |
| 729                          | 333.15          | 339.28          | 316.86          | 306.85          | 1,296.15        |
| <b>AR - ARKANSAS - Total</b> | <b>2,811.12</b> | <b>2,540.91</b> | <b>2,365.32</b> | <b>2,280.16</b> | <b>9,997.50</b> |

**STATE: AS - AMERICAN SAMOA**

| REGISTRANT ZIP CODE 3              | 1ST QUARTER | 2ND QUARTER | 3RD QUARTER | 4TH QUARTER | TOTAL GRAMS |
|------------------------------------|-------------|-------------|-------------|-------------|-------------|
| 967                                | 0.18        | 0.03        | 0.73        | 0.27        | 1.20        |
| <b>AS - AMERICAN SAMOA - Total</b> | <b>0.18</b> | <b>0.03</b> | <b>0.73</b> | <b>0.27</b> | <b>1.20</b> |

**STATE: AZ - ARIZONA**

| REGISTRANT ZIP CODE 3       | 1ST QUARTER     | 2ND QUARTER     | 3RD QUARTER     | 4TH QUARTER     | TOTAL GRAMS      |
|-----------------------------|-----------------|-----------------|-----------------|-----------------|------------------|
| 850                         | 1,031.77        | 982.06          | 953.66          | 968.43          | 3,935.92         |
| 851                         | 172.72          | 189.04          | 153.39          | 168.35          | 683.50           |
| 852                         | 1,777.03        | 1,471.75        | 1,485.34        | 1,286.75        | 6,020.86         |
| 853                         | 1,101.39        | 943.38          | 936.43          | 881.15          | 3,862.35         |
| 855                         | 81.19           | 71.77           | 69.79           | 75.56           | 298.30           |
| 856                         | 190.95          | 198.95          | 169.25          | 153.00          | 712.15           |
| 857                         | 951.37          | 903.00          | 891.22          | 855.42          | 3,601.01         |
| 859                         | 95.69           | 108.30          | 85.42           | 76.85           | 366.26           |
| 860                         | 104.91          | 105.41          | 84.97           | 79.70           | 374.99           |
| 863                         | 272.69          | 271.21          | 253.87          | 232.87          | 1,030.64         |
| 864                         | 367.69          | 342.00          | 341.28          | 277.27          | 1,328.24         |
| 865                         | 1.51            | 1.25            | 1.15            | 0.89            | 4.80             |
| <b>AZ - ARIZONA - Total</b> | <b>6,148.90</b> | <b>5,588.13</b> | <b>5,425.76</b> | <b>5,056.22</b> | <b>22,219.02</b> |

**STATE: CA - CALIFORNIA**

| REGISTRANT ZIP CODE 3 | 1ST QUARTER | 2ND QUARTER | 3RD QUARTER | 4TH QUARTER | TOTAL GRAMS |
|-----------------------|-------------|-------------|-------------|-------------|-------------|
| 900                   | 1,257.86    | 1,248.22    | 1,187.98    | 1,117.58    | 4,811.64    |
| 902                   | 546.93      | 538.53      | 467.87      | 474.50      | 2,027.83    |
| 903                   | 26.42       | 26.66       | 27.94       | 25.21       | 106.24      |
| 904                   | 287.20      | 245.01      | 217.89      | 209.87      | 959.98      |
| 905                   | 321.63      | 190.16      | 251.68      | 266.66      | 1,030.12    |
| 906                   | 358.85      | 315.03      | 333.68      | 344.39      | 1,351.95    |
| 907                   | 384.89      | 401.74      | 364.72      | 318.24      | 1,469.59    |
| 908                   | 1,096.22    | 1,632.93    | 924.80      | 1,181.72    | 4,835.67    |
| 910                   | 479.45      | 496.79      | 395.20      | 443.97      | 1,815.41    |
| 911                   | 152.55      | 203.67      | 150.93      | 127.83      | 634.98      |
| 912                   | 190.97      | 187.33      | 154.43      | 137.55      | 670.28      |
| 913                   | 1,240.25    | 1,180.38    | 1,162.28    | 1,097.80    | 4,680.71    |
| 914                   | 436.91      | 314.20      | 343.69      | 359.35      | 1,454.15    |
| 915                   | 193.25      | 190.96      | 142.72      | 129.05      | 655.97      |
| 916                   | 79.62       | 55.62       | 51.69       | 64.39       | 251.31      |
| 917                   | 1,513.23    | 1,340.06    | 1,273.39    | 1,167.69    | 5,294.37    |
| 918                   | 14.75       | 21.78       | 27.08       | 22.50       | 86.12       |
| 919                   | 283.22      | 295.33      | 257.59      | 254.82      | 1,090.97    |
| 920                   | 1,785.92    | 1,662.87    | 1,538.99    | 1,449.50    | 6,437.28    |
| 921                   | 1,228.74    | 1,023.55    | 1,078.12    | 938.69      | 4,269.10    |

|                                |                  |                  |                  |                  |                   |
|--------------------------------|------------------|------------------|------------------|------------------|-------------------|
| 922                            | 809.01           | 750.67           | 695.80           | 681.56           | 2,937.04          |
| 923                            | 1,134.42         | 1,086.27         | 1,083.81         | 1,006.46         | 4,310.96          |
| 924                            | 175.84           | 148.80           | 120.27           | 137.35           | 582.25            |
| 925                            | 1,053.24         | 1,228.07         | 1,229.50         | 765.06           | 4,275.86          |
| 926                            | 898.21           | 711.29           | 711.68           | 880.45           | 3,201.63          |
| 927                            | 352.42           | 284.80           | 221.25           | 238.78           | 1,097.25          |
| 928                            | 1,232.30         | 1,232.91         | 1,095.46         | 1,000.89         | 4,561.56          |
| 930                            | 499.91           | 517.67           | 443.12           | 441.93           | 1,902.63          |
| 931                            | 149.33           | 112.92           | 133.24           | 95.32            | 490.81            |
| 932                            | 482.57           | 438.41           | 370.65           | 358.82           | 1,650.44          |
| 933                            | 619.73           | 608.96           | 544.49           | 533.16           | 2,306.34          |
| 934                            | 702.98           | 708.51           | 706.52           | 666.33           | 2,784.35          |
| 935                            | 1,137.65         | 1,144.66         | 974.21           | 928.09           | 4,184.61          |
| 936                            | 332.96           | 326.29           | 224.86           | 226.50           | 1,110.60          |
| 937                            | 429.15           | 427.26           | 437.65           | 419.11           | 1,713.16          |
| 939                            | 284.06           | 238.38           | 230.29           | 212.48           | 965.20            |
| 940                            | 486.26           | 443.29           | 395.34           | 400.71           | 1,725.60          |
| 941                            | 873.29           | 928.14           | 793.48           | 825.61           | 3,420.52          |
| 943                            | 382.13           | 199.87           | 165.79           | 196.36           | 944.14            |
| 944                            | 70.76            | 50.92            | 63.56            | 78.35            | 263.59            |
| 945                            | 2,315.91         | 2,162.62         | 2,023.64         | 1,979.81         | 8,481.98          |
| 946                            | 354.45           | 320.12           | 313.01           | 308.58           | 1,296.15          |
| 947                            | 133.91           | 115.51           | 173.30           | 93.39            | 516.11            |
| 948                            | 70.45            | 76.69            | 71.82            | 74.92            | 293.88            |
| 949                            | 481.47           | 451.64           | 406.23           | 411.59           | 1,750.93          |
| 950                            | 442.93           | 417.11           | 388.95           | 349.96           | 1,598.95          |
| 951                            | 503.04           | 345.44           | 303.93           | 253.28           | 1,405.68          |
| 952                            | 392.60           | 323.56           | 318.57           | 261.98           | 1,296.71          |
| 953                            | 923.71           | 875.92           | 785.79           | 712.87           | 3,298.29          |
| 954                            | 687.38           | 602.64           | 587.49           | 573.90           | 2,451.42          |
| 955                            | 297.05           | 218.47           | 188.91           | 164.82           | 869.25            |
| 956                            | 1,588.16         | 1,307.29         | 1,349.37         | 1,220.04         | 5,464.87          |
| 957                            | 153.97           | 130.21           | 119.14           | 96.33            | 499.65            |
| 958                            | 1,133.99         | 1,057.10         | 938.89           | 802.47           | 3,932.45          |
| 959                            | 818.61           | 721.02           | 683.29           | 595.37           | 2,818.28          |
| 960                            | 416.09           | 343.99           | 332.90           | 286.77           | 1,379.76          |
| 961                            | 65.25            | 46.05            | 60.00            | 43.12            | 214.42            |
| <b>CA - CALIFORNIA - Total</b> | <b>34,764.05</b> | <b>32,674.26</b> | <b>30,038.86</b> | <b>28,453.83</b> | <b>125,931.00</b> |

**STATE: CO - COLORADO**

| REGISTRANT ZIP CODE 3 | 1ST QUARTER | 2ND QUARTER | 3RD QUARTER | 4TH QUARTER | TOTAL GRAMS |
|-----------------------|-------------|-------------|-------------|-------------|-------------|
|-----------------------|-------------|-------------|-------------|-------------|-------------|

|                              |                 |                 |                 |                 |                  |
|------------------------------|-----------------|-----------------|-----------------|-----------------|------------------|
| 800                          | 1,273.30        | 949.36          | 1,089.89        | 995.36          | 4,307.92         |
| 801                          | 1,298.11        | 1,418.69        | 1,154.31        | 1,345.80        | 5,216.92         |
| 802                          | 1,079.22        | 916.33          | 906.30          | 850.60          | 3,752.45         |
| 803                          | 85.35           | 92.42           | 65.07           | 73.62           | 316.45           |
| 804                          | 225.57          | 182.99          | 200.66          | 186.36          | 795.58           |
| 805                          | 596.12          | 480.67          | 454.09          | 472.11          | 2,002.99         |
| 806                          | 308.33          | 271.78          | 279.33          | 280.32          | 1,139.75         |
| 807                          | 63.19           | 59.55           | 74.37           | 72.13           | 269.24           |
| 808                          | 116.16          | 114.07          | 117.01          | 95.05           | 442.29           |
| 809                          | 703.89          | 657.09          | 631.10          | 591.21          | 2,583.29         |
| 810                          | 309.40          | 300.26          | 277.06          | 258.85          | 1,145.57         |
| 811                          | 28.91           | 26.95           | 26.73           | 17.86           | 100.45           |
| 812                          | 95.90           | 93.19           | 75.15           | 83.50           | 347.74           |
| 813                          | 60.94           | 47.50           | 35.01           | 39.61           | 183.06           |
| 814                          | 58.35           | 45.86           | 46.26           | 44.70           | 195.18           |
| 815                          | 126.99          | 95.80           | 109.59          | 101.11          | 433.49           |
| 816                          | 77.81           | 81.93           | 95.59           | 90.37           | 345.71           |
| <b>CO - COLORADO - Total</b> | <b>6,507.54</b> | <b>5,834.45</b> | <b>5,637.52</b> | <b>5,598.57</b> | <b>23,578.07</b> |

**STATE: CT - CONNECTICUT**

| REGISTRANT ZIP CODE 3           | 1ST QUARTER     | 2ND QUARTER     | 3RD QUARTER     | 4TH QUARTER     | TOTAL GRAMS      |
|---------------------------------|-----------------|-----------------|-----------------|-----------------|------------------|
| 060                             | 964.19          | 949.11          | 913.91          | 934.79          | 3,762.00         |
| 061                             | 487.51          | 480.52          | 474.27          | 447.88          | 1,890.17         |
| 062                             | 157.97          | 170.28          | 156.97          | 157.22          | 642.44           |
| 063                             | 290.62          | 252.58          | 259.87          | 233.72          | 1,036.78         |
| 064                             | 1,484.74        | 1,467.40        | 1,255.69        | 1,210.91        | 5,418.74         |
| 065                             | 520.49          | 437.71          | 418.10          | 448.94          | 1,825.25         |
| 066                             | 165.28          | 159.38          | 121.49          | 125.71          | 571.87           |
| 067                             | 423.00          | 398.15          | 379.75          | 412.46          | 1,613.36         |
| 068                             | 1,301.69        | 624.98          | 606.30          | 640.16          | 3,173.14         |
| 069                             | 99.09           | 119.07          | 104.26          | 99.31           | 421.73           |
| <b>CT - CONNECTICUT - Total</b> | <b>5,894.59</b> | <b>5,059.17</b> | <b>4,690.61</b> | <b>4,711.11</b> | <b>20,355.47</b> |

**STATE: DC - DISTRICT OF COLUMBIA**

| REGISTRANT ZIP CODE 3              | 1ST QUARTER   | 2ND QUARTER   | 3RD QUARTER   | 4TH QUARTER   | TOTAL GRAMS     |
|------------------------------------|---------------|---------------|---------------|---------------|-----------------|
| 200                                | 448.36        | 366.88        | 440.42        | 400.39        | 1,656.05        |
| 203                                | 0.71          | 0             | 0             | 0             | 0.71            |
| 204                                | 10.64         | 7.71          | 11.88         | 6.64          | 36.87           |
| <b>DC - DISTRICT OF COLUMBIA -</b> | <b>459.71</b> | <b>374.60</b> | <b>452.30</b> | <b>407.02</b> | <b>1,693.63</b> |

**STATE: DE - DELAWARE**

| REGISTRANT ZIP CODE 3 | 1ST QUARTER | 2ND QUARTER | 3RD QUARTER | 4TH QUARTER | TOTAL GRAMS |
|-----------------------|-------------|-------------|-------------|-------------|-------------|
| 197                   | 794.13      | 691.47      | 680.44      | 656.21      | 2,822.24    |

|                              |                 |                 |                 |                 |                 |
|------------------------------|-----------------|-----------------|-----------------|-----------------|-----------------|
| 198                          | 304.47          | 278.03          | 271.95          | 252.32          | 1,106.77        |
| 199                          | 715.95          | 683.94          | 568.09          | 575.40          | 2,543.37        |
| <b>DE - DELAWARE - Total</b> | <b>1,814.54</b> | <b>1,653.44</b> | <b>1,520.48</b> | <b>1,483.92</b> | <b>6,472.38</b> |

**STATE: FL - FLORIDA**

| REGISTRANT ZIP CODE 3       | 1ST QUARTER      | 2ND QUARTER      | 3RD QUARTER      | 4TH QUARTER      | TOTAL GRAMS       |
|-----------------------------|------------------|------------------|------------------|------------------|-------------------|
| 320                         | 766.70           | 730.17           | 656.65           | 577.21           | 2,730.73          |
| 321                         | 1,148.78         | 1,048.63         | 955.67           | 875.38           | 4,028.45          |
| 322                         | 1,859.52         | 1,472.90         | 1,358.48         | 1,253.97         | 5,944.87          |
| 323                         | 329.89           | 300.06           | 283.07           | 285.02           | 1,198.05          |
| 324                         | 334.32           | 288.76           | 254.52           | 218.80           | 1,096.40          |
| 325                         | 746.52           | 720.24           | 637.03           | 561.24           | 2,665.03          |
| 326                         | 540.74           | 415.89           | 389.39           | 385.13           | 1,731.14          |
| 327                         | 2,723.31         | 2,341.24         | 2,429.84         | 2,190.56         | 9,684.95          |
| 328                         | 1,793.27         | 1,694.11         | 1,621.34         | 1,504.21         | 6,612.94          |
| 329                         | 1,849.25         | 1,686.07         | 1,495.17         | 1,357.04         | 6,387.53          |
| 330                         | 1,566.62         | 1,462.77         | 1,276.97         | 1,173.12         | 5,479.49          |
| 331                         | 1,545.41         | 1,246.89         | 1,198.42         | 1,118.51         | 5,109.23          |
| 333                         | 1,321.10         | 1,044.38         | 932.78           | 873.49           | 4,171.76          |
| 334                         | 2,123.49         | 1,926.96         | 1,823.18         | 1,682.59         | 7,556.21          |
| 335                         | 1,893.89         | 1,821.36         | 1,650.77         | 1,652.41         | 7,018.43          |
| 336                         | 7,808.94         | 6,739.33         | 7,218.92         | 6,818.28         | 28,585.47         |
| 337                         | 2,851.12         | 3,013.15         | 2,568.53         | 2,382.00         | 10,814.80         |
| 338                         | 1,199.27         | 1,076.07         | 862.88           | 861.96           | 4,000.17          |
| 339                         | 1,835.22         | 1,556.16         | 1,408.79         | 1,448.47         | 6,248.65          |
| 341                         | 725.54           | 597.12           | 513.19           | 553.22           | 2,389.08          |
| 342                         | 2,299.56         | 2,159.61         | 1,891.76         | 1,882.67         | 8,233.59          |
| 344                         | 999.28           | 908.28           | 815.23           | 720.01           | 3,442.79          |
| 346                         | 3,062.14         | 2,949.17         | 2,834.50         | 2,722.19         | 11,568.00         |
| 347                         | 1,351.33         | 1,191.85         | 1,098.35         | 1,059.99         | 4,701.53          |
| 349                         | 1,077.00         | 1,099.15         | 981.58           | 963.83           | 4,121.55          |
| <b>FL - FLORIDA - Total</b> | <b>43,752.23</b> | <b>39,490.32</b> | <b>37,156.97</b> | <b>35,121.31</b> | <b>155,520.83</b> |

**STATE: GA - GEORGIA**

| REGISTRANT ZIP CODE 3 | 1ST QUARTER | 2ND QUARTER | 3RD QUARTER | 4TH QUARTER | TOTAL GRAMS |
|-----------------------|-------------|-------------|-------------|-------------|-------------|
| 300                   | 1,567.53    | 1,545.05    | 1,472.13    | 1,299.05    | 5,883.77    |
| 301                   | 828.81      | 850.67      | 819.67      | 755.00      | 3,254.15    |
| 302                   | 649.13      | 583.01      | 516.65      | 459.89      | 2,208.68    |
| 303                   | 742.65      | 1,059.35    | 703.48      | 666.83      | 3,172.31    |
| 304                   | 95.25       | 105.83      | 85.21       | 90.82       | 377.11      |
| 305                   | 528.62      | 524.04      | 515.92      | 473.83      | 2,042.42    |
| 306                   | 428.53      | 415.02      | 400.80      | 412.62      | 1,656.97    |

|                             |                 |                 |                 |                 |                  |
|-----------------------------|-----------------|-----------------|-----------------|-----------------|------------------|
| 307                         | 152.59          | 145.15          | 167.48          | 170.94          | 636.15           |
| 308                         | 108.84          | 104.42          | 108.69          | 100.16          | 422.11           |
| 309                         | 296.34          | 249.41          | 218.57          | 203.00          | 967.31           |
| 310                         | 232.27          | 221.42          | 235.37          | 194.24          | 883.30           |
| 312                         | 218.86          | 125.82          | 129.93          | 57.66           | 532.27           |
| 313                         | 158.46          | 168.57          | 149.87          | 104.59          | 581.49           |
| 314                         | 139.75          | 181.84          | 134.82          | 132.65          | 589.05           |
| 315                         | 346.57          | 330.04          | 311.18          | 276.61          | 1,264.40         |
| 316                         | 125.15          | 161.68          | 149.85          | 143.90          | 580.57           |
| 317                         | 470.67          | 365.61          | 335.42          | 346.13          | 1,517.83         |
| 318                         | 8.69            | 7.89            | 8.43            | 6.47            | 31.48            |
| 319                         | 60.39           | 67.10           | 60.65           | 57.06           | 245.21           |
| 398                         | 52.89           | 55.38           | 51.98           | 55.39           | 215.63           |
| <b>GA - GEORGIA - Total</b> | <b>7,211.99</b> | <b>7,267.29</b> | <b>6,576.09</b> | <b>6,006.85</b> | <b>27,062.23</b> |

**STATE: GU - GUAM**

| REGISTRANT ZIP CODE 3    | 1ST QUARTER  | 2ND QUARTER  | 3RD QUARTER  | 4TH QUARTER  | TOTAL GRAMS  |
|--------------------------|--------------|--------------|--------------|--------------|--------------|
| 969                      | 28.28        | 17.21        | 30.71        | 14.31        | 90.51        |
| <b>GU - GUAM - Total</b> | <b>28.28</b> | <b>17.21</b> | <b>30.71</b> | <b>14.31</b> | <b>90.51</b> |

**STATE: HI - HAWAII**

| REGISTRANT ZIP CODE 3      | 1ST QUARTER   | 2ND QUARTER   | 3RD QUARTER   | 4TH QUARTER   | TOTAL GRAMS     |
|----------------------------|---------------|---------------|---------------|---------------|-----------------|
| 967                        | 311.82        | 285.73        | 282.03        | 254.00        | 1,133.58        |
| 968                        | 234.88        | 242.57        | 210.25        | 240.17        | 927.87          |
| <b>HI - HAWAII - Total</b> | <b>546.70</b> | <b>528.30</b> | <b>492.28</b> | <b>494.18</b> | <b>2,061.45</b> |

**STATE: IA - IOWA**

| REGISTRANT ZIP CODE 3 | 1ST QUARTER | 2ND QUARTER | 3RD QUARTER | 4TH QUARTER | TOTAL GRAMS |
|-----------------------|-------------|-------------|-------------|-------------|-------------|
| 500                   | 214.34      | 193.01      | 159.18      | 194.18      | 760.71      |
| 501                   | 148.58      | 140.04      | 150.18      | 120.32      | 559.12      |
| 502                   | 162.34      | 150.27      | 169.51      | 170.60      | 652.72      |
| 503                   | 617.02      | 514.84      | 461.72      | 483.24      | 2,076.82    |
| 504                   | 45.45       | 52.22       | 51.97       | 58.11       | 207.75      |
| 505                   | 31.25       | 31.64       | 30.42       | 49.87       | 143.19      |
| 506                   | 65.72       | 66.46       | 64.24       | 73.18       | 269.60      |
| 507                   | 73.52       | 50.03       | 51.07       | 35.53       | 210.14      |
| 508                   | 14.46       | 16.72       | 22.45       | 16.93       | 70.56       |
| 510                   | 13.43       | 12.73       | 9.73        | 9.34        | 45.23       |
| 511                   | 49.65       | 55.20       | 57.87       | 48.21       | 210.94      |
| 512                   | 6.69        | 3.50        | 6.62        | 5.50        | 22.31       |
| 513                   | 24.68       | 26.44       | 19.91       | 17.11       | 88.15       |
| 514                   | 32.25       | 35.12       | 31.16       | 28.60       | 127.13      |
| 515                   | 51.37       | 60.91       | 51.42       | 65.19       | 228.89      |

|                          |                 |                 |                 |                 |                 |
|--------------------------|-----------------|-----------------|-----------------|-----------------|-----------------|
| 516                      | 10.95           | 13.30           | 13.79           | 14.41           | 52.44           |
| 520                      | 73.70           | 61.82           | 45.15           | 55.58           | 236.25          |
| 521                      | 15.89           | 12.03           | 15.31           | 11.46           | 54.70           |
| 522                      | 358.78          | 299.90          | 314.96          | 330.98          | 1,304.62        |
| 523                      | 59.90           | 61.50           | 58.60           | 46.60           | 226.59          |
| 524                      | 117.14          | 137.31          | 79.35           | 68.07           | 401.87          |
| 525                      | 190.67          | 150.01          | 152.86          | 144.68          | 638.21          |
| 526                      | 96.38           | 97.08           | 87.96           | 77.51           | 358.94          |
| 527                      | 85.83           | 89.73           | 94.48           | 81.24           | 351.29          |
| 528                      | 62.87           | 73.00           | 76.42           | 68.87           | 281.16          |
| <b>IA - IOWA - Total</b> | <b>2,622.86</b> | <b>2,404.82</b> | <b>2,276.33</b> | <b>2,275.32</b> | <b>9,579.33</b> |

**STATE: ID - IDAHO**

| REGISTRANT ZIP CODE 3     | 1ST QUARTER     | 2ND QUARTER     | 3RD QUARTER     | 4TH QUARTER     | TOTAL GRAMS     |
|---------------------------|-----------------|-----------------|-----------------|-----------------|-----------------|
| 832                       | 152.89          | 144.57          | 130.32          | 111.75          | 539.52          |
| 833                       | 154.81          | 145.19          | 180.48          | 147.06          | 627.53          |
| 834                       | 92.60           | 111.72          | 82.81           | 71.35           | 358.49          |
| 835                       | 98.22           | 83.82           | 95.65           | 94.72           | 372.41          |
| 836                       | 618.99          | 545.91          | 507.28          | 454.53          | 2,126.72        |
| 837                       | 507.49          | 562.77          | 463.73          | 538.47          | 2,072.46        |
| 838                       | 238.65          | 278.53          | 205.60          | 197.93          | 920.70          |
| <b>ID - IDAHO - Total</b> | <b>1,863.65</b> | <b>1,872.51</b> | <b>1,665.87</b> | <b>1,615.81</b> | <b>7,017.83</b> |

**STATE: IL - ILLINOIS**

| REGISTRANT ZIP CODE 3 | 1ST QUARTER | 2ND QUARTER | 3RD QUARTER | 4TH QUARTER | TOTAL GRAMS |
|-----------------------|-------------|-------------|-------------|-------------|-------------|
| 600                   | 1,652.66    | 1,580.20    | 1,439.48    | 1,383.90    | 6,056.24    |
| 601                   | 1,070.31    | 988.13      | 884.25      | 1,035.31    | 3,977.99    |
| 602                   | 40.77       | 74.68       | 56.16       | 40.43       | 212.05      |
| 603                   | 99.61       | 86.99       | 102.81      | 75.22       | 364.64      |
| 604                   | 1,104.91    | 1,179.77    | 1,113.46    | 1,025.36    | 4,423.50    |
| 605                   | 697.81      | 679.24      | 628.11      | 557.36      | 2,562.52    |
| 606                   | 1,452.28    | 1,372.99    | 1,276.78    | 1,279.85    | 5,381.90    |
| 607                   | 56.67       | 49.76       | 56.00       | 67.49       | 229.92      |
| 608                   | 72.06       | 73.87       | 68.44       | 74.81       | 289.18      |
| 609                   | 109.75      | 125.24      | 106.88      | 109.90      | 451.77      |
| 610                   | 57.81       | 59.53       | 64.66       | 64.82       | 246.82      |
| 611                   | 278.99      | 139.98      | 181.15      | 190.24      | 790.37      |
| 612                   | 73.12       | 63.79       | 67.98       | 68.09       | 272.98      |
| 613                   | 67.88       | 62.99       | 58.50       | 49.50       | 238.88      |
| 614                   | 66.85       | 39.88       | 39.59       | 33.92       | 180.24      |
| 615                   | 82.61       | 65.07       | 58.84       | 61.90       | 268.42      |
| 616                   | 157.65      | 150.84      | 167.13      | 128.98      | 604.60      |



|                              |                 |                 |                 |                 |                  |
|------------------------------|-----------------|-----------------|-----------------|-----------------|------------------|
| 617                          | 185.73          | 171.15          | 161.27          | 152.96          | 671.11           |
| 618                          | 225.68          | 211.77          | 230.32          | 202.95          | 870.72           |
| 619                          | 47.25           | 44.62           | 41.86           | 41.63           | 175.35           |
| 620                          | 226.00          | 152.62          | 113.57          | 109.04          | 601.23           |
| 622                          | 250.48          | 181.42          | 201.57          | 158.67          | 792.14           |
| 623                          | 90.30           | 77.97           | 57.82           | 51.05           | 277.14           |
| 624                          | 94.30           | 71.81           | 89.58           | 75.36           | 331.04           |
| 625                          | 203.62          | 178.42          | 162.91          | 167.88          | 712.83           |
| 626                          | 76.71           | 57.39           | 63.25           | 58.80           | 256.15           |
| 627                          | 146.96          | 139.44          | 125.15          | 156.80          | 568.36           |
| 628                          | 101.65          | 66.67           | 76.48           | 80.05           | 324.85           |
| 629                          | 103.97          | 99.22           | 96.86           | 94.80           | 394.86           |
| <b>IL - ILLINOIS - Total</b> | <b>8,894.40</b> | <b>8,245.46</b> | <b>7,790.86</b> | <b>7,597.06</b> | <b>32,527.78</b> |

**STATE: IN - INDIANA**

| REGISTRANT ZIP CODE 3       | 1ST QUARTER     | 2ND QUARTER     | 3RD QUARTER     | 4TH QUARTER     | TOTAL GRAMS      |
|-----------------------------|-----------------|-----------------|-----------------|-----------------|------------------|
| 460                         | 401.93          | 311.26          | 289.39          | 279.02          | 1,281.60         |
| 461                         | 264.84          | 244.74          | 267.79          | 293.89          | 1,071.25         |
| 462                         | 1,314.35        | 1,255.05        | 1,074.00        | 949.71          | 4,593.11         |
| 463                         | 430.27          | 388.21          | 404.43          | 337.53          | 1,560.44         |
| 464                         | 40.48           | 41.33           | 33.81           | 36.22           | 151.83           |
| 465                         | 341.21          | 339.38          | 302.19          | 237.09          | 1,219.88         |
| 466                         | 102.42          | 101.51          | 60.70           | 83.99           | 348.62           |
| 467                         | 240.66          | 253.88          | 220.31          | 203.63          | 918.48           |
| 468                         | 406.48          | 348.61          | 286.25          | 312.07          | 1,353.41         |
| 469                         | 129.56          | 123.03          | 97.50           | 96.49           | 446.58           |
| 470                         | 27.67           | 45.18           | 29.60           | 28.58           | 131.04           |
| 471                         | 238.67          | 149.38          | 136.45          | 127.63          | 652.13           |
| 472                         | 174.09          | 154.12          | 126.49          | 130.50          | 585.19           |
| 473                         | 234.83          | 253.74          | 265.26          | 221.91          | 975.73           |
| 474                         | 183.60          | 127.50          | 137.76          | 123.91          | 572.77           |
| 475                         | 255.77          | 238.78          | 164.15          | 196.01          | 854.70           |
| 476                         | 87.20           | 89.54           | 95.54           | 100.31          | 372.59           |
| 477                         | 250.36          | 232.76          | 256.72          | 269.55          | 1,009.39         |
| 478                         | 106.87          | 95.39           | 78.08           | 75.85           | 356.19           |
| 479                         | 200.26          | 193.99          | 168.79          | 144.57          | 707.60           |
| <b>IN - INDIANA - Total</b> | <b>5,431.52</b> | <b>4,987.37</b> | <b>4,495.20</b> | <b>4,248.44</b> | <b>19,162.53</b> |

**STATE: KS - KANSAS**

| REGISTRANT ZIP CODE 3 | 1ST QUARTER | 2ND QUARTER | 3RD QUARTER | 4TH QUARTER | TOTAL GRAMS |
|-----------------------|-------------|-------------|-------------|-------------|-------------|
| 660                   | 356.83      | 368.16      | 324.17      | 306.60      | 1,355.77    |
| 661                   | 154.50      | 103.39      | 160.02      | 119.69      | 537.60      |

|                            |                 |                 |                 |                 |                  |
|----------------------------|-----------------|-----------------|-----------------|-----------------|------------------|
| 662                        | 603.19          | 650.32          | 699.01          | 565.15          | <b>2,517.67</b>  |
| 664                        | 86.76           | 81.03           | 87.02           | 81.22           | <b>336.03</b>    |
| 665                        | 106.30          | 103.32          | 101.72          | 104.88          | <b>416.22</b>    |
| 666                        | 75.18           | 93.56           | 88.09           | 90.30           | <b>347.13</b>    |
| 667                        | 96.62           | 86.08           | 96.24           | 92.88           | <b>371.82</b>    |
| 668                        | 25.11           | 28.77           | 21.54           | 23.57           | <b>98.99</b>     |
| 669                        | 15.98           | 22.66           | 12.43           | 11.26           | <b>62.33</b>     |
| 670                        | 139.26          | 126.32          | 120.68          | 127.35          | <b>513.61</b>    |
| 671                        | 112.75          | 103.08          | 73.72           | 90.21           | <b>379.76</b>    |
| 672                        | 607.70          | 475.92          | 546.92          | 534.98          | <b>2,165.52</b>  |
| 673                        | 31.43           | 29.44           | 38.82           | 26.69           | <b>126.38</b>    |
| 674                        | 120.94          | 138.65          | 119.32          | 132.30          | <b>511.20</b>    |
| 675                        | 233.17          | 217.08          | 241.08          | 241.85          | <b>933.18</b>    |
| 676                        | 82.04           | 73.21           | 63.47           | 75.60           | <b>294.32</b>    |
| 677                        | 17.52           | 20.22           | 16.75           | 18.60           | <b>73.09</b>     |
| 678                        | 65.81           | 56.96           | 55.55           | 48.81           | <b>227.14</b>    |
| 679                        | 26.17           | 22.57           | 24.84           | 42.58           | <b>116.16</b>    |
| <b>KS - KANSAS - Total</b> | <b>2,957.25</b> | <b>2,800.73</b> | <b>2,891.40</b> | <b>2,734.53</b> | <b>11,383.91</b> |

## STATE: KY - KENTUCKY

| REGISTRANT ZIP CODE 3 | 1ST QUARTER | 2ND QUARTER | 3RD QUARTER | 4TH QUARTER | TOTAL GRAMS     |
|-----------------------|-------------|-------------|-------------|-------------|-----------------|
| 400                   | 85.66       | 67.73       | 64.82       | 66.65       | <b>284.87</b>   |
| 401                   | 40.06       | 43.98       | 38.76       | 32.73       | <b>155.53</b>   |
| 402                   | 799.99      | 841.40      | 601.10      | 627.89      | <b>2,870.39</b> |
| 403                   | 62.12       | 64.23       | 57.61       | 51.17       | <b>235.14</b>   |
| 404                   | 22.75       | 21.97       | 21.38       | 8.68        | <b>74.78</b>    |
| 405                   | 315.91      | 226.41      | 246.05      | 307.44      | <b>1,095.82</b> |
| 406                   | 43.06       | 18.26       | 14.89       | 14.76       | <b>90.97</b>    |
| 407                   | 18.68       | 12.51       | 14.58       | 11.41       | <b>57.18</b>    |
| 408                   | 7.88        | 5.50        | 3.42        | 6.19        | <b>22.99</b>    |
| 409                   | 13.47       | 7.77        | 17.36       | 3.64        | <b>42.24</b>    |
| 410                   | 142.77      | 107.53      | 111.77      | 134.08      | <b>496.15</b>   |
| 411                   | 35.75       | 34.70       | 28.26       | 33.25       | <b>131.95</b>   |
| 412                   | 4.73        | 5.73        | 3.34        | 3.47        | <b>17.28</b>    |
| 413                   | 6.12        | 5.85        | 1.71        | 5.38        | <b>19.06</b>    |
| 414                   | 0.18        | 0.05        | 0           | 0           | <b>0.23</b>     |
| 415                   | 8.86        | 10.01       | 21.47       | 18.19       | <b>58.53</b>    |
| 416                   | 5.44        | 5.18        | 2.00        | 1.11        | <b>13.74</b>    |
| 417                   | 39.39       | 38.11       | 47.46       | 40.74       | <b>165.69</b>   |
| 418                   | 1.06        | 2.56        | 3.42        | 3.13        | <b>10.16</b>    |
| 420                   | 192.42      | 219.04      | 187.39      | 159.03      | <b>757.88</b>   |

|                              |                 |                 |                 |                 |                 |
|------------------------------|-----------------|-----------------|-----------------|-----------------|-----------------|
| 421                          | 176.50          | 157.80          | 189.51          | 351.31          | 875.13          |
| 422                          | 145.62          | 140.13          | 140.13          | 87.29           | 513.17          |
| 423                          | 120.67          | 114.01          | 117.52          | 114.75          | 466.96          |
| 424                          | 161.97          | 179.64          | 138.01          | 137.08          | 616.70          |
| 425                          | 15.14           | 11.80           | 28.04           | 20.57           | 75.54           |
| 426                          | 4.92            | 8.42            | 4.79            | 4.17            | 22.30           |
| 427                          | 74.00           | 74.94           | 71.77           | 70.64           | 291.36          |
| <b>KY - KENTUCKY - Total</b> | <b>2,545.12</b> | <b>2,425.27</b> | <b>2,176.57</b> | <b>2,314.77</b> | <b>9,461.73</b> |

**STATE: LA - LOUISIANA**

| REGISTRANT ZIP CODE 3         | 1ST QUARTER     | 2ND QUARTER     | 3RD QUARTER     | 4TH QUARTER     | TOTAL GRAMS      |
|-------------------------------|-----------------|-----------------|-----------------|-----------------|------------------|
| 700                           | 202.17          | 181.17          | 177.86          | 162.01          | 723.22           |
| 701                           | 208.53          | 155.07          | 223.54          | 151.33          | 738.47           |
| 703                           | 110.73          | 99.03           | 90.61           | 97.66           | 398.03           |
| 704                           | 373.44          | 325.68          | 338.75          | 297.38          | 1,335.25         |
| 705                           | 689.93          | 853.52          | 744.04          | 662.69          | 2,950.18         |
| 706                           | 148.75          | 151.91          | 133.05          | 115.56          | 549.27           |
| 707                           | 391.89          | 390.10          | 298.88          | 292.22          | 1,373.09         |
| 708                           | 231.87          | 190.68          | 201.19          | 166.10          | 789.85           |
| 710                           | 34.84           | 37.40           | 34.06           | 38.44           | 144.75           |
| 711                           | 261.02          | 149.50          | 165.23          | 118.94          | 694.69           |
| 712                           | 94.18           | 92.29           | 109.48          | 86.67           | 382.61           |
| 713                           | 139.42          | 147.81          | 132.11          | 142.86          | 562.21           |
| 714                           | 54.26           | 56.37           | 51.77           | 68.07           | 230.46           |
| <b>LA - LOUISIANA - Total</b> | <b>2,941.03</b> | <b>2,830.54</b> | <b>2,700.56</b> | <b>2,399.95</b> | <b>10,872.08</b> |

**STATE: MA - MASSACHUSETTS**

| REGISTRANT ZIP CODE 3 | 1ST QUARTER | 2ND QUARTER | 3RD QUARTER | 4TH QUARTER | TOTAL GRAMS |
|-----------------------|-------------|-------------|-------------|-------------|-------------|
| 010                   | 486.19      | 479.54      | 440.23      | 488.84      | 1,894.81    |
| 011                   | 359.70      | 460.69      | 263.58      | 276.42      | 1,360.39    |
| 012                   | 90.64       | 87.43       | 88.57       | 82.66       | 349.30      |
| 013                   | 50.81       | 55.53       | 46.94       | 52.53       | 205.82      |
| 014                   | 77.66       | 76.22       | 75.76       | 70.71       | 300.35      |
| 015                   | 175.10      | 163.15      | 166.28      | 149.34      | 653.87      |
| 016                   | 181.14      | 197.11      | 122.56      | 130.53      | 631.34      |
| 017                   | 282.18      | 299.06      | 387.36      | 309.68      | 1,278.28    |
| 018                   | 1,139.47    | 1,148.36    | 1,115.84    | 844.83      | 4,248.51    |
| 019                   | 373.04      | 346.04      | 350.87      | 355.37      | 1,425.32    |
| 020                   | 407.59      | 459.70      | 326.08      | 320.13      | 1,513.50    |
| 021                   | 1,703.97    | 1,611.51    | 1,392.44    | 1,462.49    | 6,170.40    |
| 022                   | 270.41      | 318.14      | 220.27      | 249.84      | 1,058.65    |
| 023                   | 354.82      | 353.44      | 372.69      | 310.38      | 1,391.33    |

|                                   |                 |                 |                 |                 |                  |
|-----------------------------------|-----------------|-----------------|-----------------|-----------------|------------------|
| 024                               | 236.24          | 193.41          | 172.43          | 198.96          | <b>801.03</b>    |
| 025                               | 89.74           | 81.89           | 67.02           | 69.03           | <b>307.68</b>    |
| 026                               | 152.60          | 140.41          | 134.00          | 115.09          | <b>542.11</b>    |
| 027                               | 457.76          | 422.10          | 439.35          | 442.18          | <b>1,761.39</b>  |
| <b>MA - MASSACHUSETTS - Total</b> | <b>6,889.07</b> | <b>6,893.72</b> | <b>6,182.28</b> | <b>5,929.01</b> | <b>25,894.08</b> |

**STATE: MD - MARYLAND**

| REGISTRANT ZIP CODE 3        | 1ST QUARTER     | 2ND QUARTER     | 3RD QUARTER     | 4TH QUARTER     | TOTAL GRAMS      |
|------------------------------|-----------------|-----------------|-----------------|-----------------|------------------|
| 206                          | 400.15          | 385.66          | 349.73          | 382.72          | <b>1,518.25</b>  |
| 207                          | 584.45          | 497.79          | 442.58          | 403.23          | <b>1,928.06</b>  |
| 208                          | 926.56          | 825.45          | 801.36          | 742.16          | <b>3,295.53</b>  |
| 209                          | 226.42          | 163.77          | 167.02          | 188.16          | <b>745.36</b>    |
| 210                          | 994.54          | 997.75          | 1,032.74        | 891.49          | <b>3,916.53</b>  |
| 211                          | 487.36          | 396.78          | 375.00          | 362.14          | <b>1,621.29</b>  |
| 212                          | 1,838.62        | 1,706.93        | 1,688.57        | 1,760.92        | <b>6,995.04</b>  |
| 214                          | 157.21          | 105.76          | 100.81          | 101.75          | <b>465.53</b>    |
| 215                          | 88.50           | 58.96           | 49.24           | 57.92           | <b>254.63</b>    |
| 216                          | 102.13          | 100.82          | 117.44          | 132.22          | <b>452.62</b>    |
| 217                          | 765.31          | 667.05          | 646.38          | 612.28          | <b>2,691.01</b>  |
| 218                          | 283.40          | 185.46          | 206.37          | 198.43          | <b>873.67</b>    |
| 219                          | 357.32          | 303.62          | 271.48          | 236.01          | <b>1,168.43</b>  |
| <b>MD - MARYLAND - Total</b> | <b>7,211.98</b> | <b>6,395.81</b> | <b>6,248.74</b> | <b>6,069.43</b> | <b>25,925.96</b> |

**STATE: ME - MAINE**

| REGISTRANT ZIP CODE 3     | 1ST QUARTER     | 2ND QUARTER     | 3RD QUARTER     | 4TH QUARTER     | TOTAL GRAMS     |
|---------------------------|-----------------|-----------------|-----------------|-----------------|-----------------|
| 039                       | 22.50           | 8.74            | 13.39           | 16.42           | <b>61.05</b>    |
| 040                       | 315.37          | 299.21          | 321.55          | 301.95          | <b>1,238.09</b> |
| 041                       | 373.04          | 215.42          | 186.82          | 295.13          | <b>1,070.41</b> |
| 042                       | 107.63          | 100.45          | 108.52          | 102.73          | <b>419.34</b>   |
| 043                       | 280.54          | 380.14          | 126.36          | 303.45          | <b>1,090.48</b> |
| 044                       | 207.17          | 203.09          | 201.03          | 147.68          | <b>758.97</b>   |
| 045                       | 41.14           | 37.96           | 37.02           | 36.35           | <b>152.47</b>   |
| 046                       | 69.64           | 60.94           | 57.69           | 78.39           | <b>266.65</b>   |
| 047                       | 28.86           | 33.86           | 25.69           | 25.98           | <b>114.39</b>   |
| 048                       | 34.17           | 32.45           | 28.73           | 16.35           | <b>111.71</b>   |
| 049                       | 143.08          | 148.56          | 128.32          | 117.80          | <b>537.76</b>   |
| <b>ME - MAINE - Total</b> | <b>1,623.13</b> | <b>1,520.84</b> | <b>1,235.11</b> | <b>1,442.22</b> | <b>5,821.30</b> |

**STATE: MI - MICHIGAN**

| REGISTRANT ZIP CODE 3 | 1ST QUARTER | 2ND QUARTER | 3RD QUARTER | 4TH QUARTER | TOTAL GRAMS     |
|-----------------------|-------------|-------------|-------------|-------------|-----------------|
| 480                   | 1,220.93    | 932.23      | 893.62      | 834.95      | <b>3,881.73</b> |
| 481                   | 954.39      | 806.98      | 669.16      | 695.14      | <b>3,125.67</b> |
| 482                   | 832.53      | 790.64      | 719.00      | 734.85      | <b>3,077.03</b> |

|                              |                 |                 |                 |                 |                  |
|------------------------------|-----------------|-----------------|-----------------|-----------------|------------------|
| 483                          | 850.66          | 1,267.30        | 942.56          | 972.66          | 4,033.18         |
| 484                          | 297.27          | 252.85          | 236.49          | 248.66          | 1,035.27         |
| 485                          | 170.46          | 213.72          | 171.71          | 133.64          | 689.53           |
| 486                          | 384.86          | 456.14          | 324.93          | 276.76          | 1,442.70         |
| 487                          | 107.56          | 118.25          | 86.00           | 89.14           | 400.94           |
| 488                          | 293.51          | 276.98          | 266.50          | 279.11          | 1,116.10         |
| 489                          | 196.33          | 195.79          | 146.34          | 138.50          | 676.97           |
| 490                          | 464.53          | 421.21          | 434.51          | 403.49          | 1,723.73         |
| 491                          | 40.69           | 50.78           | 38.23           | 34.31           | 164.02           |
| 492                          | 163.24          | 157.72          | 133.15          | 109.98          | 564.09           |
| 493                          | 108.95          | 101.87          | 99.60           | 88.70           | 399.12           |
| 494                          | 250.02          | 241.98          | 199.62          | 233.69          | 925.31           |
| 495                          | 433.77          | 385.63          | 364.92          | 393.42          | 1,577.74         |
| 496                          | 374.63          | 371.15          | 354.71          | 331.17          | 1,431.67         |
| 497                          | 204.53          | 217.97          | 182.00          | 141.35          | 745.84           |
| 498                          | 259.81          | 210.39          | 166.71          | 94.68           | 731.59           |
| 499                          | 45.85           | 34.90           | 40.85           | 42.07           | 163.66           |
| <b>MI - MICHIGAN - Total</b> | <b>7,654.53</b> | <b>7,504.48</b> | <b>6,470.61</b> | <b>6,276.27</b> | <b>27,905.89</b> |

**STATE: MN - MINNESOTA**

| REGISTRANT ZIP CODE 3         | 1ST QUARTER     | 2ND QUARTER     | 3RD QUARTER     | 4TH QUARTER     | TOTAL GRAMS      |
|-------------------------------|-----------------|-----------------|-----------------|-----------------|------------------|
| 550                           | 470.51          | 469.66          | 504.75          | 489.97          | 1,934.89         |
| 551                           | 863.73          | 908.10          | 852.99          | 887.75          | 3,512.57         |
| 553                           | 585.77          | 546.80          | 533.90          | 514.52          | 2,180.99         |
| 554                           | 1,892.28        | 1,643.74        | 1,754.78        | 1,701.54        | 6,992.35         |
| 556                           | 6.43            | 3.92            | 4.68            | 3.76            | 18.79            |
| 557                           | 158.67          | 141.05          | 148.31          | 140.46          | 588.49           |
| 558                           | 162.04          | 175.39          | 137.36          | 110.47          | 585.26           |
| 559                           | 503.17          | 459.76          | 499.31          | 469.62          | 1,931.86         |
| 560                           | 122.83          | 123.46          | 122.88          | 128.06          | 497.23           |
| 561                           | 13.22           | 13.34           | 19.06           | 12.39           | 58.01            |
| 562                           | 47.73           | 40.88           | 47.04           | 35.16           | 170.82           |
| 563                           | 246.26          | 209.68          | 122.17          | 148.48          | 726.58           |
| 564                           | 80.93           | 89.37           | 85.38           | 86.53           | 342.21           |
| 565                           | 142.31          | 153.40          | 90.51           | 73.31           | 459.53           |
| 566                           | 39.55           | 36.28           | 42.27           | 36.97           | 155.07           |
| 567                           | 13.44           | 21.99           | 19.11           | 25.82           | 80.35            |
| <b>MN - MINNESOTA - Total</b> | <b>5,348.87</b> | <b>5,036.82</b> | <b>4,984.49</b> | <b>4,864.83</b> | <b>20,235.00</b> |

**STATE: MO - MISSOURI**

| REGISTRANT ZIP CODE 3 | 1ST QUARTER | 2ND QUARTER | 3RD QUARTER | 4TH QUARTER | TOTAL GRAMS |
|-----------------------|-------------|-------------|-------------|-------------|-------------|
| 630                   | 603.08      | 596.25      | 501.49      | 573.35      | 2,274.17    |

|                              |                 |                 |                 |                 |                  |
|------------------------------|-----------------|-----------------|-----------------|-----------------|------------------|
| 631                          | 1,198.71        | 789.22          | 804.89          | 792.04          | 3,584.87         |
| 633                          | 226.34          | 220.13          | 188.06          | 169.52          | 804.05           |
| 634                          | 37.75           | 33.80           | 24.84           | 25.95           | 122.33           |
| 635                          | 50.09           | 46.03           | 48.99           | 49.96           | 195.08           |
| 636                          | 144.57          | 105.97          | 82.19           | 75.61           | 408.34           |
| 637                          | 93.78           | 81.17           | 73.85           | 63.02           | 311.82           |
| 638                          | 55.39           | 40.20           | 38.01           | 50.28           | 183.87           |
| 639                          | 38.20           | 39.59           | 36.48           | 32.52           | 146.79           |
| 640                          | 350.61          | 354.86          | 383.68          | 325.47          | 1,414.61         |
| 641                          | 443.14          | 340.09          | 319.78          | 302.22          | 1,405.22         |
| 644                          | 85.01           | 73.92           | 58.88           | 60.84           | 278.65           |
| 645                          | 442.18          | 362.99          | 316.78          | 279.39          | 1,401.33         |
| 646                          | 114.05          | 110.01          | 86.41           | 76.31           | 386.78           |
| 647                          | 62.77           | 56.15           | 54.47           | 54.14           | 227.53           |
| 648                          | 206.21          | 218.92          | 233.45          | 203.02          | 861.60           |
| 650                          | 98.71           | 62.28           | 57.52           | 53.81           | 272.31           |
| 651                          | 32.66           | 36.37           | 31.79           | 30.73           | 131.55           |
| 652                          | 324.29          | 286.68          | 246.59          | 359.14          | 1,216.70         |
| 653                          | 33.34           | 34.87           | 35.89           | 33.47           | 137.56           |
| 654                          | 27.13           | 25.70           | 24.06           | 14.78           | 91.67            |
| 655                          | 65.89           | 73.20           | 72.87           | 63.23           | 275.19           |
| 656                          | 272.34          | 250.89          | 238.22          | 248.85          | 1,010.30         |
| 657                          | 399.58          | 397.72          | 375.62          | 401.13          | 1,574.05         |
| 658                          | 400.47          | 398.63          | 353.12          | 362.70          | 1,514.92         |
| <b>MO - MISSOURI - Total</b> | <b>5,806.27</b> | <b>5,035.62</b> | <b>4,687.94</b> | <b>4,701.49</b> | <b>20,231.31</b> |

**STATE: MS - MISSISSIPPI**

| REGISTRANT ZIP CODE 3           | 1ST QUARTER     | 2ND QUARTER     | 3RD QUARTER     | 4TH QUARTER     | TOTAL GRAMS      |
|---------------------------------|-----------------|-----------------|-----------------|-----------------|------------------|
| 386                             | 162.95          | 165.20          | 104.31          | 138.70          | 571.15           |
| 387                             | 6.44            | 3.91            | 7.34            | 8.53            | 26.22            |
| 388                             | 127.69          | 110.20          | 76.99           | 98.92           | 413.80           |
| 389                             | 22.65           | 20.54           | 21.14           | 28.84           | 93.18            |
| 390                             | 84.32           | 86.75           | 82.92           | 94.92           | 348.90           |
| 391                             | 3,043.29        | 5,025.51        | 4,183.05        | 3,281.35        | 15,533.21        |
| 392                             | 303.54          | 185.14          | 231.23          | 151.99          | 871.90           |
| 393                             | 68.22           | 59.56           | 54.66           | 50.61           | 233.05           |
| 394                             | 258.55          | 230.55          | 184.04          | 244.67          | 917.81           |
| 395                             | 363.43          | 301.13          | 395.98          | 301.09          | 1,361.64         |
| 396                             | 30.87           | 32.25           | 30.81           | 23.62           | 117.56           |
| 397                             | 25.44           | 30.24           | 16.83           | 25.61           | 98.11            |
| <b>MS - MISSISSIPPI - Total</b> | <b>4,497.39</b> | <b>6,250.99</b> | <b>5,389.31</b> | <b>4,448.85</b> | <b>20,586.53</b> |

**STATE: MT - MONTANA**

| REGISTRANT ZIP CODE 3       | 1ST QUARTER     | 2ND QUARTER     | 3RD QUARTER     | 4TH QUARTER     | TOTAL GRAMS     |
|-----------------------------|-----------------|-----------------|-----------------|-----------------|-----------------|
| 590                         | 96.72           | 80.21           | 79.50           | 75.91           | 332.35          |
| 591                         | 472.63          | 446.18          | 450.02          | 435.77          | 1,804.60        |
| 592                         | 38.37           | 34.70           | 34.11           | 39.91           | 147.10          |
| 593                         | 60.73           | 52.35           | 52.25           | 54.84           | 220.16          |
| 594                         | 97.97           | 79.17           | 83.87           | 75.73           | 336.74          |
| 595                         | 9.26            | 16.46           | 13.38           | 11.61           | 50.72           |
| 596                         | 118.24          | 71.86           | 63.26           | 53.62           | 306.98          |
| 597                         | 316.15          | 152.14          | 177.33          | 174.94          | 820.57          |
| 598                         | 278.31          | 297.49          | 277.53          | 250.04          | 1,103.36        |
| 599                         | 133.19          | 113.12          | 127.23          | 117.03          | 490.57          |
| <b>MT - MONTANA - Total</b> | <b>1,621.56</b> | <b>1,343.70</b> | <b>1,358.48</b> | <b>1,289.40</b> | <b>5,613.14</b> |

**STATE: NC - NORTH CAROLINA**

| REGISTRANT ZIP CODE 3              | 1ST QUARTER     | 2ND QUARTER     | 3RD QUARTER     | 4TH QUARTER     | TOTAL GRAMS      |
|------------------------------------|-----------------|-----------------|-----------------|-----------------|------------------|
| 270                                | 252.10          | 209.74          | 210.16          | 218.45          | 890.46           |
| 271                                | 446.39          | 358.60          | 841.70          | 294.00          | 1,940.70         |
| 272                                | 536.68          | 684.48          | 623.66          | 533.37          | 2,378.19         |
| 273                                | 364.87          | 361.03          | 326.23          | 333.37          | 1,385.51         |
| 274                                | 296.00          | 241.45          | 280.71          | 268.09          | 1,086.25         |
| 275                                | 1,407.59        | 977.53          | 1,172.24        | 1,253.70        | 4,811.05         |
| 276                                | 397.30          | 374.29          | 349.59          | 372.98          | 1,494.15         |
| 277                                | 438.54          | 626.71          | 573.25          | 441.09          | 2,079.58         |
| 278                                | 405.86          | 335.57          | 382.03          | 373.68          | 1,497.14         |
| 279                                | 254.38          | 222.94          | 224.36          | 227.60          | 929.28           |
| 280                                | 571.79          | 532.46          | 539.86          | 515.04          | 2,159.14         |
| 281                                | 372.76          | 415.63          | 393.54          | 420.21          | 1,602.14         |
| 282                                | 639.04          | 505.59          | 569.27          | 651.52          | 2,365.42         |
| 283                                | 686.61          | 681.11          | 651.81          | 587.98          | 2,607.51         |
| 284                                | 468.30          | 451.10          | 446.61          | 448.18          | 1,814.18         |
| 285                                | 425.15          | 398.25          | 396.82          | 393.91          | 1,614.13         |
| 286                                | 1,015.63        | 726.51          | 658.91          | 691.07          | 3,092.12         |
| 287                                | 351.59          | 346.58          | 321.21          | 319.24          | 1,338.61         |
| 288                                | 311.99          | 261.64          | 302.94          | 191.67          | 1,068.24         |
| 289                                | 63.41           | 51.60           | 70.02           | 53.55           | 238.58           |
| <b>NC - NORTH CAROLINA - Total</b> | <b>9,705.96</b> | <b>8,762.82</b> | <b>9,334.90</b> | <b>8,588.70</b> | <b>36,392.38</b> |

**STATE: ND - NORTH DAKOTA**

| REGISTRANT ZIP CODE 3 | 1ST QUARTER | 2ND QUARTER | 3RD QUARTER | 4TH QUARTER | TOTAL GRAMS |
|-----------------------|-------------|-------------|-------------|-------------|-------------|
| 580                   | 31.85       | 32.29       | 32.71       | 27.10       | 123.95      |
| 581                   | 124.34      | 115.89      | 177.16      | 246.65      | 664.04      |

|                                  |               |               |               |               |                 |
|----------------------------------|---------------|---------------|---------------|---------------|-----------------|
| 582                              | 54.59         | 36.69         | 43.26         | 51.79         | 186.33          |
| 583                              | 13.48         | 10.85         | 15.30         | 16.86         | 56.49           |
| 584                              | 10.92         | 14.84         | 11.53         | 14.52         | 51.82           |
| 585                              | 214.79        | 228.51        | 241.56        | 193.70        | 878.57          |
| 586                              | 30.90         | 32.73         | 27.76         | 30.59         | 121.97          |
| 587                              | 51.30         | 46.01         | 41.17         | 39.83         | 178.31          |
| 588                              | 24.70         | 28.08         | 28.60         | 29.88         | 111.26          |
| <b>ND - NORTH DAKOTA - Total</b> | <b>556.87</b> | <b>545.90</b> | <b>619.05</b> | <b>650.92</b> | <b>2,372.74</b> |

**STATE: NE - NEBRASKA**

| REGISTRANT ZIP CODE 3        | 1ST QUARTER     | 2ND QUARTER     | 3RD QUARTER     | 4TH QUARTER     | TOTAL GRAMS     |
|------------------------------|-----------------|-----------------|-----------------|-----------------|-----------------|
| 680                          | 157.83          | 162.28          | 167.01          | 169.80          | 656.93          |
| 681                          | 490.37          | 467.82          | 498.82          | 440.29          | 1,897.30        |
| 683                          | 27.89           | 16.53           | 13.83           | 14.74           | 72.98           |
| 684                          | 23.49           | 24.17           | 22.95           | 25.12           | 95.73           |
| 685                          | 107.48          | 110.74          | 134.78          | 125.56          | 478.55          |
| 686                          | 23.60           | 25.99           | 20.33           | 26.16           | 96.09           |
| 687                          | 44.22           | 42.86           | 29.06           | 27.78           | 143.92          |
| 688                          | 97.37           | 96.68           | 89.54           | 103.35          | 386.94          |
| 689                          | 27.05           | 45.64           | 23.06           | 24.15           | 119.90          |
| 690                          | 12.67           | 14.88           | 11.04           | 14.48           | 53.06           |
| 691                          | 32.14           | 38.20           | 33.83           | 45.84           | 150.02          |
| 692                          | 3.37            | 2.93            | 3.92            | 5.59            | 15.81           |
| 693                          | 36.43           | 34.26           | 38.91           | 36.00           | 145.60          |
| <b>NE - NEBRASKA - Total</b> | <b>1,083.90</b> | <b>1,082.98</b> | <b>1,087.07</b> | <b>1,058.86</b> | <b>4,312.82</b> |

**STATE: NH - NEW HAMPSHIRE**

| REGISTRANT ZIP CODE 3             | 1ST QUARTER     | 2ND QUARTER     | 3RD QUARTER     | 4TH QUARTER     | TOTAL GRAMS     |
|-----------------------------------|-----------------|-----------------|-----------------|-----------------|-----------------|
| 030                               | 382.50          | 350.42          | 373.34          | 338.42          | 1,444.69        |
| 031                               | 267.75          | 170.34          | 173.17          | 190.83          | 802.10          |
| 032                               | 142.66          | 168.63          | 160.33          | 148.73          | 620.35          |
| 033                               | 197.28          | 213.75          | 125.37          | 283.77          | 820.17          |
| 034                               | 66.68           | 55.39           | 61.33           | 69.73           | 253.13          |
| 035                               | 81.29           | 76.71           | 73.69           | 84.64           | 316.33          |
| 036                               | 4.26            | 5.59            | 4.08            | 4.01            | 17.93           |
| 037                               | 203.03          | 314.50          | 220.32          | 171.07          | 908.93          |
| 038                               | 401.81          | 383.00          | 322.24          | 304.07          | 1,411.12        |
| <b>NH - NEW HAMPSHIRE - Total</b> | <b>1,747.28</b> | <b>1,738.34</b> | <b>1,513.86</b> | <b>1,595.28</b> | <b>6,594.75</b> |

**STATE: NJ - NEW JERSEY**

| REGISTRANT ZIP CODE 3 | 1ST QUARTER | 2ND QUARTER | 3RD QUARTER | 4TH QUARTER | TOTAL GRAMS |
|-----------------------|-------------|-------------|-------------|-------------|-------------|
| 070                   | 1,268.54    | 1,188.68    | 1,026.36    | 1,041.23    | 4,524.81    |
| 071                   | 201.07      | 194.22      | 203.12      | 217.06      | 815.48      |



|                                |                 |                 |                 |                 |                  |
|--------------------------------|-----------------|-----------------|-----------------|-----------------|------------------|
| 072                            | 93.94           | 81.75           | 96.18           | 91.36           | 363.24           |
| 073                            | 51.06           | 50.93           | 56.53           | 44.38           | 202.90           |
| 074                            | 658.75          | 732.42          | 814.21          | 817.63          | 3,023.00         |
| 075                            | 178.11          | 77.40           | 209.82          | 136.57          | 601.90           |
| 076                            | 794.11          | 756.37          | 734.20          | 699.02          | 2,983.70         |
| 077                            | 636.95          | 573.69          | 594.05          | 589.32          | 2,394.01         |
| 078                            | 316.58          | 296.25          | 309.30          | 304.51          | 1,226.65         |
| 079                            | 413.05          | 310.58          | 349.92          | 359.86          | 1,433.41         |
| 080                            | 917.26          | 893.16          | 880.09          | 852.82          | 3,543.33         |
| 081                            | 195.79          | 169.79          | 141.29          | 146.04          | 652.92           |
| 082                            | 137.77          | 126.37          | 145.35          | 105.08          | 514.57           |
| 083                            | 110.01          | 108.68          | 100.29          | 101.83          | 420.80           |
| 084                            | 14.97           | 22.67           | 25.69           | 23.37           | 86.70            |
| 085                            | 172.28          | 178.22          | 163.52          | 173.01          | 687.03           |
| 086                            | 107.99          | 110.39          | 112.97          | 112.09          | 443.45           |
| 087                            | 377.63          | 324.18          | 344.16          | 322.54          | 1,368.51         |
| 088                            | 1,026.67        | 835.28          | 842.39          | 872.20          | 3,576.54         |
| 089                            | 150.72          | 127.00          | 143.65          | 127.90          | 549.27           |
| <b>NJ - NEW JERSEY - Total</b> | <b>7,823.25</b> | <b>7,158.03</b> | <b>7,293.09</b> | <b>7,137.84</b> | <b>29,412.21</b> |

**STATE: NM - NEW MEXICO**

| REGISTRANT ZIP CODE 3          | 1ST QUARTER     | 2ND QUARTER     | 3RD QUARTER     | 4TH QUARTER     | TOTAL GRAMS     |
|--------------------------------|-----------------|-----------------|-----------------|-----------------|-----------------|
| 870                            | 73.50           | 69.82           | 75.44           | 75.64           | 294.40          |
| 871                            | 593.12          | 559.68          | 610.32          | 521.33          | 2,284.46        |
| 873                            | 7.61            | 6.86            | 14.25           | 8.44            | 37.15           |
| 874                            | 60.71           | 52.54           | 54.51           | 60.16           | 227.92          |
| 875                            | 116.69          | 142.64          | 124.66          | 124.80          | 508.79          |
| 877                            | 30.03           | 24.76           | 26.50           | 26.91           | 108.19          |
| 878                            | 3.90            | 1.11            | 1.77            | 0.71            | 7.49            |
| 879                            | 9.84            | 15.39           | 9.03            | 10.55           | 44.81           |
| 880                            | 102.52          | 111.42          | 103.81          | 109.34          | 427.09          |
| 881                            | 16.98           | 20.27           | 22.47           | 22.19           | 81.90           |
| 882                            | 105.85          | 96.07           | 94.27           | 74.81           | 371.00          |
| 883                            | 26.60           | 22.28           | 26.03           | 29.69           | 104.61          |
| 884                            | 0.35            | 1.07            | 0.73            | 1.08            | 3.24            |
| <b>NM - NEW MEXICO - Total</b> | <b>1,147.70</b> | <b>1,123.91</b> | <b>1,163.79</b> | <b>1,065.66</b> | <b>4,501.06</b> |

**STATE: NV - NEVADA**

| REGISTRANT ZIP CODE 3 | 1ST QUARTER | 2ND QUARTER | 3RD QUARTER | 4TH QUARTER | TOTAL GRAMS |
|-----------------------|-------------|-------------|-------------|-------------|-------------|
| 890                   | 537.88      | 556.88      | 561.08      | 508.21      | 2,164.05    |
| 891                   | 1,433.39    | 1,178.73    | 1,288.24    | 1,292.13    | 5,192.48    |
| 893                   | 1.06        | 0.99        | 0.75        | 1.20        | 4.01        |

|                            |                 |                 |                 |                 |                 |
|----------------------------|-----------------|-----------------|-----------------|-----------------|-----------------|
| 894                        | 156.86          | 159.12          | 159.45          | 159.41          | 634.85          |
| 895                        | 252.62          | 177.87          | 195.79          | 189.78          | 816.05          |
| 897                        | 88.97           | 99.07           | 83.40           | 72.80           | 344.25          |
| 898                        | 30.80           | 27.03           | 22.95           | 18.49           | 99.27           |
| <b>NV - NEVADA - Total</b> | <b>2,501.58</b> | <b>2,199.70</b> | <b>2,311.65</b> | <b>2,242.03</b> | <b>9,254.96</b> |

**STATE: NY - NEW YORK**

| REGISTRANT ZIP CODE 3 | 1ST QUARTER | 2ND QUARTER | 3RD QUARTER | 4TH QUARTER | TOTAL GRAMS |
|-----------------------|-------------|-------------|-------------|-------------|-------------|
| 100                   | 2,970.26    | 2,948.42    | 2,643.70    | 2,458.37    | 11,020.75   |
| 101                   | 35.16       | 38.03       | 31.85       | 26.53       | 131.56      |
| 102                   | 4.43        | 2.38        | 2.19        | 2.66        | 11.66       |
| 103                   | 378.29      | 330.90      | 340.80      | 323.44      | 1,373.44    |
| 104                   | 618.55      | 778.32      | 699.31      | 734.04      | 2,830.22    |
| 105                   | 457.94      | 507.87      | 443.66      | 408.63      | 1,818.11    |
| 106                   | 128.08      | 93.70       | 105.45      | 90.67       | 417.90      |
| 107                   | 127.20      | 95.70       | 97.22       | 104.30      | 424.41      |
| 108                   | 34.93       | 52.03       | 29.36       | 37.06       | 153.39      |
| 109                   | 491.08      | 463.47      | 434.03      | 447.36      | 1,835.93    |
| 110                   | 1,063.49    | 745.74      | 1,003.30    | 806.88      | 3,619.42    |
| 111                   | 209.10      | 161.18      | 150.86      | 121.74      | 642.88      |
| 112                   | 1,121.49    | 1,101.79    | 996.27      | 964.00      | 4,183.55    |
| 113                   | 475.60      | 431.17      | 432.56      | 430.60      | 1,769.93    |
| 114                   | 349.67      | 348.82      | 222.74      | 222.47      | 1,143.70    |
| 115                   | 758.48      | 842.61      | 753.65      | 733.13      | 3,087.87    |
| 116                   | 42.62       | 52.36       | 54.66       | 45.89       | 195.53      |
| 117                   | 2,191.08    | 2,188.95    | 1,979.34    | 1,972.11    | 8,331.48    |
| 118                   | 123.02      | 186.99      | 202.24      | 153.60      | 665.85      |
| 119                   | 218.42      | 195.01      | 195.72      | 170.75      | 779.90      |
| 120                   | 195.97      | 207.12      | 158.88      | 169.81      | 731.79      |
| 121                   | 84.45       | 86.84       | 83.06       | 89.31       | 343.66      |
| 122                   | 162.86      | 221.95      | 206.36      | 242.84      | 834.01      |
| 123                   | 47.55       | 49.73       | 49.04       | 51.13       | 197.45      |
| 124                   | 187.12      | 183.00      | 179.63      | 169.60      | 719.34      |
| 125                   | 343.09      | 320.35      | 344.10      | 318.18      | 1,325.72    |
| 126                   | 159.23      | 221.36      | 107.36      | 118.18      | 606.13      |
| 127                   | 144.99      | 99.29       | 98.62       | 87.93       | 430.83      |
| 128                   | 192.46      | 174.18      | 176.24      | 159.15      | 702.03      |
| 129                   | 319.57      | 293.07      | 375.01      | 288.33      | 1,275.98    |
| 130                   | 172.80      | 171.66      | 152.75      | 135.45      | 632.65      |
| 131                   | 93.93       | 96.28       | 97.60       | 86.87       | 374.68      |
| 132                   | 179.70      | 159.75      | 167.56      | 134.78      | 641.80      |

|                              |                  |                  |                  |                  |                  |
|------------------------------|------------------|------------------|------------------|------------------|------------------|
| 133                          | 79.80            | 79.08            | 66.35            | 63.24            | 288.47           |
| 134                          | 71.21            | 82.66            | 75.11            | 65.67            | 294.65           |
| 135                          | 60.21            | 38.40            | 35.00            | 27.35            | 160.96           |
| 136                          | 133.17           | 145.98           | 152.65           | 153.14           | 584.95           |
| 137                          | 53.27            | 58.73            | 45.71            | 40.93            | 198.64           |
| 138                          | 101.52           | 105.13           | 123.51           | 135.07           | 465.23           |
| 139                          | 62.66            | 33.14            | 35.06            | 29.62            | 160.49           |
| 140                          | 262.38           | 231.88           | 249.61           | 194.82           | 938.69           |
| 141                          | 116.43           | 120.86           | 134.61           | 122.50           | 494.40           |
| 142                          | 563.08           | 414.33           | 398.89           | 414.77           | 1,791.07         |
| 143                          | 34.74            | 36.89            | 30.74            | 23.30            | 125.66           |
| 144                          | 308.06           | 266.79           | 270.84           | 287.62           | 1,133.31         |
| 145                          | 215.29           | 192.91           | 197.27           | 192.03           | 797.50           |
| 146                          | 858.27           | 859.90           | 859.92           | 861.84           | 3,439.93         |
| 147                          | 55.20            | 61.33            | 66.56            | 79.47            | 262.56           |
| 148                          | 231.38           | 201.62           | 213.34           | 213.83           | 860.16           |
| 149                          | 52.22            | 45.18            | 42.81            | 36.86            | 177.08           |
| <b>NY - NEW YORK - Total</b> | <b>17,341.51</b> | <b>16,824.83</b> | <b>16,013.10</b> | <b>15,247.83</b> | <b>65,427.26</b> |

## STATE: OH - OHIO

| REGISTRANT ZIP CODE 3 | 1ST QUARTER | 2ND QUARTER | 3RD QUARTER | 4TH QUARTER | TOTAL GRAMS |
|-----------------------|-------------|-------------|-------------|-------------|-------------|
| 430                   | 776.01      | 744.47      | 743.25      | 703.26      | 2,966.99    |
| 431                   | 239.99      | 240.36      | 229.36      | 229.33      | 939.04      |
| 432                   | 1,263.49    | 1,075.08    | 666.66      | 649.01      | 3,654.24    |
| 433                   | 126.11      | 121.01      | 123.11      | 127.33      | 497.57      |
| 434                   | 77.74       | 87.22       | 70.22       | 49.56       | 284.74      |
| 435                   | 383.38      | 187.53      | 212.49      | 397.52      | 1,180.92    |
| 436                   | 260.27      | 235.49      | 230.27      | 208.96      | 934.98      |
| 437                   | 159.95      | 118.28      | 121.52      | 111.60      | 511.35      |
| 438                   | 17.02       | 22.09       | 18.55       | 16.85       | 74.51       |
| 439                   | 115.87      | 99.62       | 86.13       | 101.75      | 403.37      |
| 440                   | 293.09      | 311.62      | 287.75      | 245.51      | 1,137.97    |
| 441                   | 1,161.86    | 806.45      | 771.09      | 702.42      | 3,441.82    |
| 442                   | 302.44      | 305.89      | 301.58      | 276.78      | 1,186.70    |
| 443                   | 247.30      | 228.33      | 216.44      | 182.02      | 874.10      |
| 444                   | 130.04      | 149.76      | 87.50       | 128.03      | 495.34      |
| 445                   | 83.41       | 81.81       | 84.42       | 127.08      | 376.73      |
| 446                   | 378.95      | 335.49      | 318.58      | 350.85      | 1,383.88    |
| 447                   | 296.62      | 262.66      | 241.59      | 269.29      | 1,070.17    |
| 448                   | 152.42      | 126.20      | 127.09      | 109.71      | 515.42      |
| 449                   | 31.64       | 40.08       | 43.20       | 37.44       | 152.35      |

|                          |                 |                 |                 |                 |                  |
|--------------------------|-----------------|-----------------|-----------------|-----------------|------------------|
| 450                      | 388.77          | 411.44          | 355.59          | 373.63          | 1,529.44         |
| 451                      | 199.59          | 136.53          | 147.12          | 129.34          | 612.58           |
| 452                      | 619.59          | 425.37          | 467.33          | 416.26          | 1,928.55         |
| 453                      | 155.55          | 149.10          | 149.38          | 144.58          | 598.61           |
| 454                      | 372.42          | 285.78          | 254.43          | 242.87          | 1,155.50         |
| 455                      | 63.69           | 52.84           | 40.29           | 43.92           | 200.74           |
| 456                      | 219.41          | 191.08          | 158.18          | 220.16          | 788.83           |
| 457                      | 71.91           | 82.39           | 64.26           | 136.73          | 355.28           |
| 458                      | 198.87          | 177.98          | 235.23          | 222.34          | 834.42           |
| <b>OH - OHIO - Total</b> | <b>8,787.42</b> | <b>7,491.97</b> | <b>6,852.60</b> | <b>6,954.14</b> | <b>30,086.13</b> |

**STATE: OK - OKLAHOMA**

| REGISTRANT ZIP CODE 3        | 1ST QUARTER     | 2ND QUARTER     | 3RD QUARTER     | 4TH QUARTER     | TOTAL GRAMS      |
|------------------------------|-----------------|-----------------|-----------------|-----------------|------------------|
| 730                          | 538.80          | 520.64          | 570.34          | 368.63          | 1,998.41         |
| 731                          | 766.21          | 672.41          | 779.47          | 643.88          | 2,861.97         |
| 734                          | 89.21           | 68.86           | 64.43           | 53.22           | 275.71           |
| 735                          | 197.70          | 174.79          | 223.37          | 154.23          | 750.09           |
| 736                          | 17.25           | 15.59           | 18.32           | 26.58           | 77.73            |
| 737                          | 62.74           | 44.44           | 40.55           | 36.77           | 184.49           |
| 738                          | 16.14           | 14.71           | 14.09           | 14.32           | 59.25            |
| 739                          | 7.31            | 1.78            | 0.89            | 0.90            | 10.88            |
| 740                          | 453.65          | 604.65          | 410.61          | 369.05          | 1,837.97         |
| 741                          | 460.18          | 411.33          | 378.29          | 415.76          | 1,665.57         |
| 743                          | 108.07          | 97.10           | 97.42           | 108.27          | 410.85           |
| 744                          | 154.70          | 129.21          | 140.31          | 137.06          | 561.29           |
| 745                          | 91.30           | 97.91           | 96.64           | 91.48           | 377.32           |
| 746                          | 20.39           | 18.13           | 16.38           | 7.42            | 62.31            |
| 747                          | 96.74           | 96.45           | 69.89           | 84.30           | 347.38           |
| 748                          | 106.52          | 92.45           | 76.69           | 72.50           | 348.16           |
| 749                          | 179.60          | 164.38          | 174.24          | 153.22          | 671.44           |
| <b>OK - OKLAHOMA - Total</b> | <b>3,366.51</b> | <b>3,224.82</b> | <b>3,171.93</b> | <b>2,737.57</b> | <b>12,500.83</b> |

**STATE: OR - OREGON**

| REGISTRANT ZIP CODE 3 | 1ST QUARTER | 2ND QUARTER | 3RD QUARTER | 4TH QUARTER | TOTAL GRAMS |
|-----------------------|-------------|-------------|-------------|-------------|-------------|
| 970                   | 664.66      | 641.24      | 613.96      | 620.66      | 2,540.52    |
| 971                   | 302.94      | 295.10      | 256.67      | 282.11      | 1,136.82    |
| 972                   | 1,361.10    | 1,102.64    | 982.20      | 1,015.85    | 4,461.80    |
| 973                   | 610.42      | 551.52      | 515.84      | 493.76      | 2,171.53    |
| 974                   | 804.05      | 717.52      | 683.86      | 637.64      | 2,843.07    |
| 975                   | 409.51      | 441.89      | 397.71      | 407.94      | 1,657.05    |
| 976                   | 25.85       | 38.11       | 30.87       | 39.66       | 134.48      |
| 977                   | 130.25      | 149.61      | 151.28      | 137.45      | 568.59      |

|                            |                 |                 |                 |                 |                  |
|----------------------------|-----------------|-----------------|-----------------|-----------------|------------------|
| 978                        | 142.37          | 120.51          | 96.67           | 98.83           | <b>458.37</b>    |
| 979                        | 30.99           | 38.29           | 34.80           | 25.30           | <b>129.37</b>    |
| <b>OR - OREGON - Total</b> | <b>4,482.13</b> | <b>4,096.43</b> | <b>3,763.84</b> | <b>3,759.19</b> | <b>16,101.59</b> |

**STATE: PA - PENNSYLVANIA**

| REGISTRANT ZIP CODE 3 | 1ST QUARTER | 2ND QUARTER | 3RD QUARTER | 4TH QUARTER | TOTAL GRAMS     |
|-----------------------|-------------|-------------|-------------|-------------|-----------------|
| 150                   | 326.56      | 329.68      | 335.26      | 316.53      | <b>1,308.03</b> |
| 151                   | 120.76      | 116.88      | 108.64      | 94.43       | <b>440.72</b>   |
| 152                   | 687.34      | 454.38      | 743.99      | 639.75      | <b>2,525.46</b> |
| 153                   | 104.80      | 107.52      | 108.50      | 71.69       | <b>392.51</b>   |
| 154                   | 80.42       | 72.13       | 70.08       | 56.29       | <b>278.92</b>   |
| 155                   | 102.76      | 69.54       | 65.96       | 56.96       | <b>295.22</b>   |
| 156                   | 142.44      | 239.09      | 143.36      | 137.46      | <b>662.35</b>   |
| 157                   | 42.96       | 54.00       | 35.60       | 41.28       | <b>173.84</b>   |
| 158                   | 56.03       | 67.76       | 59.28       | 56.83       | <b>239.91</b>   |
| 159                   | 115.65      | 95.55       | 82.74       | 81.03       | <b>374.96</b>   |
| 160                   | 63.59       | 66.79       | 63.06       | 55.26       | <b>248.69</b>   |
| 161                   | 127.14      | 112.27      | 100.77      | 102.02      | <b>442.20</b>   |
| 162                   | 36.79       | 33.94       | 25.35       | 28.05       | <b>124.13</b>   |
| 163                   | 223.21      | 192.89      | 245.07      | 219.17      | <b>880.34</b>   |
| 164                   | 74.84       | 90.84       | 74.05       | 88.10       | <b>327.83</b>   |
| 165                   | 111.07      | 101.18      | 103.55      | 120.87      | <b>436.67</b>   |
| 166                   | 178.11      | 144.78      | 147.43      | 145.76      | <b>616.08</b>   |
| 167                   | 30.55       | 29.99       | 31.25       | 37.11       | <b>128.90</b>   |
| 168                   | 69.11       | 68.87       | 54.88       | 45.79       | <b>238.65</b>   |
| 169                   | 37.64       | 24.13       | 29.82       | 30.55       | <b>122.13</b>   |
| 170                   | 570.13      | 464.14      | 488.64      | 396.52      | <b>1,919.43</b> |
| 171                   | 190.04      | 144.97      | 126.17      | 132.33      | <b>593.51</b>   |
| 172                   | 124.12      | 202.92      | 112.12      | 110.77      | <b>549.93</b>   |
| 173                   | 198.89      | 204.39      | 186.72      | 175.45      | <b>765.45</b>   |
| 174                   | 143.44      | 132.53      | 117.88      | 112.11      | <b>505.96</b>   |
| 175                   | 194.47      | 181.49      | 165.58      | 159.11      | <b>700.65</b>   |
| 176                   | 372.97      | 389.80      | 218.54      | 204.85      | <b>1,186.16</b> |
| 177                   | 91.41       | 85.72       | 83.10       | 64.75       | <b>324.98</b>   |
| 178                   | 223.71      | 221.68      | 159.03      | 174.76      | <b>779.18</b>   |
| 179                   | 39.72       | 33.97       | 33.17       | 30.46       | <b>137.33</b>   |
| 180                   | 364.52      | 336.18      | 285.04      | 317.16      | <b>1,302.90</b> |
| 181                   | 279.60      | 191.74      | 244.16      | 209.63      | <b>925.13</b>   |
| 182                   | 49.12       | 54.93       | 57.14       | 38.35       | <b>199.53</b>   |
| 183                   | 162.90      | 176.69      | 128.49      | 133.50      | <b>601.58</b>   |
| 184                   | 170.84      | 146.70      | 159.52      | 144.83      | <b>621.89</b>   |

|                                  |                  |                  |                  |                  |                  |
|----------------------------------|------------------|------------------|------------------|------------------|------------------|
| 185                              | 182.24           | 201.76           | 118.59           | 102.85           | 605.43           |
| 186                              | 107.68           | 77.61            | 77.98            | 90.69            | 353.96           |
| 187                              | 632.67           | 594.22           | 554.16           | 554.40           | 2,335.44         |
| 188                              | 42.27            | 55.55            | 39.01            | 34.42            | 171.27           |
| 189                              | 334.86           | 311.09           | 315.77           | 317.81           | 1,279.54         |
| 190                              | 4,471.59         | 3,150.98         | 2,484.41         | 2,703.42         | 12,810.40        |
| 191                              | 1,612.44         | 1,628.12         | 1,237.29         | 1,263.24         | 5,741.09         |
| 193                              | 442.31           | 401.37           | 365.14           | 394.74           | 1,603.55         |
| 194                              | 714.98           | 648.23           | 471.02           | 537.88           | 2,372.11         |
| 195                              | 71.19            | 62.64            | 73.01            | 69.92            | 276.76           |
| 196                              | 166.02           | 183.04           | 163.10           | 136.53           | 648.69           |
| <b>PA - PENNSYLVANIA - Total</b> | <b>14,685.90</b> | <b>12,754.69</b> | <b>11,093.41</b> | <b>11,035.38</b> | <b>49,569.38</b> |

**STATE: PR - PUERTO RICO**

| REGISTRANT ZIP CODE 3           | 1ST QUARTER  | 2ND QUARTER  | 3RD QUARTER  | 4TH QUARTER  | TOTAL GRAMS   |
|---------------------------------|--------------|--------------|--------------|--------------|---------------|
| 006                             | 13.48        | 15.96        | 8.87         | 6.92         | 45.22         |
| 007                             | 5.32         | 3.90         | 5.14         | 3.90         | 18.26         |
| 009                             | 32.45        | 46.77        | 41.58        | 45.39        | 166.19        |
| <b>PR - PUERTO RICO - Total</b> | <b>51.25</b> | <b>66.63</b> | <b>55.59</b> | <b>56.21</b> | <b>229.67</b> |

**STATE: RI - RHODE ISLAND**

| REGISTRANT ZIP CODE 3            | 1ST QUARTER   | 2ND QUARTER   | 3RD QUARTER   | 4TH QUARTER   | TOTAL GRAMS     |
|----------------------------------|---------------|---------------|---------------|---------------|-----------------|
| 028                              | 467.72        | 456.21        | 390.08        | 365.62        | 1,679.63        |
| 029                              | 351.10        | 284.95        | 229.75        | 203.35        | 1,069.14        |
| <b>RI - RHODE ISLAND - Total</b> | <b>818.83</b> | <b>741.16</b> | <b>619.82</b> | <b>568.97</b> | <b>2,748.77</b> |

**STATE: SC - SOUTH CAROLINA**

| REGISTRANT ZIP CODE 3              | 1ST QUARTER     | 2ND QUARTER     | 3RD QUARTER     | 4TH QUARTER     | TOTAL GRAMS      |
|------------------------------------|-----------------|-----------------|-----------------|-----------------|------------------|
| 290                                | 397.42          | 416.42          | 412.27          | 352.37          | 1,578.47         |
| 291                                | 597.76          | 579.79          | 637.11          | 579.61          | 2,394.27         |
| 292                                | 512.07          | 562.89          | 538.42          | 435.68          | 2,049.07         |
| 293                                | 249.77          | 210.89          | 216.98          | 179.74          | 857.38           |
| 294                                | 914.05          | 890.67          | 883.35          | 869.57          | 3,557.64         |
| 295                                | 922.66          | 885.07          | 831.89          | 757.01          | 3,396.63         |
| 296                                | 787.43          | 655.66          | 642.51          | 575.07          | 2,660.67         |
| 297                                | 182.19          | 165.42          | 160.66          | 161.48          | 669.76           |
| 298                                | 221.77          | 205.57          | 231.50          | 222.27          | 881.11           |
| 299                                | 297.54          | 407.64          | 388.51          | 282.94          | 1,376.64         |
| <b>SC - SOUTH CAROLINA - Total</b> | <b>5,082.66</b> | <b>4,980.02</b> | <b>4,943.20</b> | <b>4,415.74</b> | <b>19,421.63</b> |

**STATE: SD - SOUTH DAKOTA**

| REGISTRANT ZIP CODE 3 | 1ST QUARTER | 2ND QUARTER | 3RD QUARTER | 4TH QUARTER | TOTAL GRAMS |
|-----------------------|-------------|-------------|-------------|-------------|-------------|
| 570                   | 66.36       | 61.26       | 61.23       | 78.12       | 266.98      |
| 571                   | 284.35      | 237.33      | 278.40      | 244.88      | 1,044.96    |

|                                  |               |               |               |               |                 |
|----------------------------------|---------------|---------------|---------------|---------------|-----------------|
| 572                              | 20.03         | 26.23         | 23.79         | 20.86         | 90.91           |
| 573                              | 14.21         | 14.10         | 13.42         | 16.58         | 58.31           |
| 574                              | 13.32         | 16.13         | 14.83         | 7.75          | 52.03           |
| 575                              | 18.76         | 20.40         | 17.99         | 19.05         | 76.20           |
| 576                              | 7.87          | 9.22          | 3.69          | 31.08         | 51.86           |
| 577                              | 100.90        | 89.01         | 73.69         | 73.46         | 337.06          |
| <b>SD - SOUTH DAKOTA - Total</b> | <b>525.80</b> | <b>473.70</b> | <b>487.04</b> | <b>491.78</b> | <b>1,978.32</b> |

**STATE: TN - TENNESSEE**

| REGISTRANT ZIP CODE 3         | 1ST QUARTER     | 2ND QUARTER     | 3RD QUARTER     | 4TH QUARTER     | TOTAL GRAMS      |
|-------------------------------|-----------------|-----------------|-----------------|-----------------|------------------|
| 370                           | 570.93          | 407.47          | 443.47          | 409.04          | 1,830.91         |
| 371                           | 394.77          | 332.05          | 425.11          | 404.80          | 1,556.73         |
| 372                           | 759.79          | 559.02          | 480.89          | 514.72          | 2,314.42         |
| 373                           | 467.79          | 432.54          | 442.61          | 487.15          | 1,830.10         |
| 374                           | 323.50          | 268.09          | 220.31          | 215.15          | 1,027.06         |
| 376                           | 310.40          | 311.17          | 280.09          | 271.09          | 1,172.74         |
| 377                           | 102.13          | 102.22          | 125.80          | 85.36           | 415.51           |
| 378                           | 197.02          | 221.40          | 192.56          | 174.36          | 785.35           |
| 379                           | 357.97          | 201.20          | 325.40          | 640.15          | 1,524.72         |
| 380                           | 224.50          | 180.57          | 221.70          | 206.37          | 833.14           |
| 381                           | 3,559.89        | 1,172.79        | 1,521.81        | 1,215.20        | 7,469.68         |
| 382                           | 53.44           | 45.12           | 37.23           | 31.99           | 167.78           |
| 383                           | 88.09           | 63.15           | 83.32           | 77.53           | 312.10           |
| 384                           | 56.95           | 76.46           | 49.72           | 54.09           | 237.22           |
| 385                           | 198.47          | 132.45          | 99.94           | 83.42           | 514.28           |
| <b>TN - TENNESSEE - Total</b> | <b>7,665.65</b> | <b>4,505.69</b> | <b>4,949.97</b> | <b>4,870.43</b> | <b>21,991.74</b> |

**STATE: TX - TEXAS**

| REGISTRANT ZIP CODE 3 | 1ST QUARTER | 2ND QUARTER | 3RD QUARTER | 4TH QUARTER | TOTAL GRAMS |
|-----------------------|-------------|-------------|-------------|-------------|-------------|
| 750                   | 2,055.81    | 2,009.12    | 1,895.56    | 1,811.80    | 7,772.29    |
| 751                   | 438.55      | 414.57      | 382.99      | 384.30      | 1,620.41    |
| 752                   | 1,330.75    | 859.34      | 850.79      | 1,299.74    | 4,340.62    |
| 753                   | 177.04      | 93.22       | 132.69      | 66.03       | 468.98      |
| 754                   | 426.89      | 413.89      | 375.54      | 369.49      | 1,585.82    |
| 755                   | 107.53      | 100.68      | 68.81       | 66.79       | 343.82      |
| 756                   | 1,035.36    | 125.26      | 1,028.53    | 487.14      | 2,676.29    |
| 757                   | 337.15      | 360.73      | 275.61      | 354.48      | 1,327.98    |
| 758                   | 46.71       | 35.78       | 25.80       | 33.98       | 142.27      |
| 759                   | 159.02      | 156.99      | 152.21      | 137.92      | 606.14      |
| 760                   | 951.81      | 856.14      | 772.41      | 772.96      | 3,353.33    |
| 761                   | 1,021.87    | 1,064.13    | 970.53      | 1,082.29    | 4,138.82    |
| 762                   | 666.68      | 701.41      | 517.27      | 773.52      | 2,658.88    |

|                           |                  |                  |                  |                  |                  |
|---------------------------|------------------|------------------|------------------|------------------|------------------|
| 763                       | 241.43           | 232.96           | 197.95           | 240.53           | 912.87           |
| 764                       | 92.05            | 102.23           | 90.80            | 91.69            | 376.77           |
| 765                       | 403.30           | 368.86           | 321.40           | 331.90           | 1,425.46         |
| 766                       | 52.47            | 38.19            | 39.94            | 45.53            | 176.12           |
| 767                       | 69.29            | 74.83            | 69.05            | 69.77            | 282.94           |
| 768                       | 130.64           | 38.88            | 41.09            | 51.93            | 262.54           |
| 769                       | 39.59            | 40.66            | 34.54            | 49.08            | 163.87           |
| 770                       | 2,364.35         | 2,038.17         | 1,852.94         | 1,867.41         | 8,122.87         |
| 773                       | 968.39           | 864.34           | 835.41           | 765.11           | 3,433.25         |
| 774                       | 639.79           | 574.98           | 594.56           | 564.55           | 2,373.89         |
| 775                       | 975.19           | 1,095.68         | 1,095.42         | 968.03           | 4,134.32         |
| 776                       | 448.21           | 406.32           | 388.22           | 407.11           | 1,649.87         |
| 777                       | 249.79           | 210.01           | 246.36           | 286.64           | 992.80           |
| 778                       | 148.80           | 115.30           | 96.06            | 110.18           | 470.34           |
| 779                       | 370.73           | 406.99           | 346.78           | 311.52           | 1,436.02         |
| 780                       | 192.55           | 197.14           | 208.82           | 201.40           | 799.90           |
| 781                       | 307.99           | 276.20           | 291.16           | 253.11           | 1,128.46         |
| 782                       | 1,563.31         | 1,653.78         | 1,420.36         | 1,309.67         | 5,947.13         |
| 783                       | 119.72           | 104.03           | 88.62            | 90.02            | 402.38           |
| 784                       | 256.40           | 223.25           | 234.19           | 190.41           | 904.24           |
| 785                       | 314.20           | 294.38           | 267.93           | 280.94           | 1,157.44         |
| 786                       | 790.16           | 749.16           | 648.13           | 627.98           | 2,815.43         |
| 787                       | 823.19           | 831.53           | 807.11           | 823.62           | 3,285.45         |
| 788                       | 35.93            | 26.94            | 32.06            | 31.92            | 126.85           |
| 789                       | 31.40            | 22.88            | 29.40            | 26.23            | 109.92           |
| 790                       | 75.69            | 57.93            | 48.65            | 51.70            | 233.97           |
| 791                       | 175.14           | 168.23           | 141.63           | 138.63           | 623.63           |
| 792                       | 10.59            | 7.09             | 6.61             | 6.03             | 30.32            |
| 793                       | 75.28            | 69.58            | 56.29            | 70.25            | 271.40           |
| 794                       | 384.34           | 315.84           | 279.39           | 313.96           | 1,293.54         |
| 795                       | 39.85            | 42.67            | 37.28            | 33.06            | 152.85           |
| 796                       | 104.08           | 63.29            | 66.13            | 74.29            | 307.79           |
| 797                       | 202.84           | 181.67           | 173.13           | 155.79           | 713.43           |
| 798                       | 12.94            | 15.52            | 8.16             | 11.57            | 48.19            |
| 799                       | 406.62           | 338.00           | 401.40           | 317.32           | 1,463.33         |
| <b>TX - TEXAS - Total</b> | <b>21,871.45</b> | <b>19,438.77</b> | <b>18,945.69</b> | <b>18,809.33</b> | <b>79,065.23</b> |

**STATE: UT - UTAH**

| REGISTRANT ZIP CODE 3 | 1ST QUARTER | 2ND QUARTER | 3RD QUARTER | 4TH QUARTER | TOTAL GRAMS |
|-----------------------|-------------|-------------|-------------|-------------|-------------|
| 840                   | 1,020.21    | 778.25      | 885.30      | 794.74      | 3,478.50    |
| 841                   | 982.38      | 684.70      | 756.39      | 730.74      | 3,154.20    |



|                          |                 |                 |                 |                 |                 |
|--------------------------|-----------------|-----------------|-----------------|-----------------|-----------------|
| 843                      | 148.68          | 120.37          | 142.67          | 137.55          | 549.27          |
| 844                      | 169.46          | 141.33          | 167.74          | 171.10          | 649.63          |
| 845                      | 30.47           | 29.94           | 31.50           | 29.79           | 121.71          |
| 846                      | 224.21          | 187.52          | 202.52          | 206.81          | 821.06          |
| 847                      | 236.63          | 203.42          | 250.71          | 204.08          | 894.83          |
| <b>UT - UTAH - Total</b> | <b>2,812.04</b> | <b>2,145.52</b> | <b>2,436.83</b> | <b>2,274.81</b> | <b>9,669.19</b> |

**STATE: VA - VIRGINIA**

| REGISTRANT ZIP CODE 3        | 1ST QUARTER     | 2ND QUARTER     | 3RD QUARTER     | 4TH QUARTER     | TOTAL GRAMS      |
|------------------------------|-----------------|-----------------|-----------------|-----------------|------------------|
| 201                          | 958.88          | 853.08          | 756.41          | 826.20          | 3,394.57         |
| 220                          | 427.75          | 479.82          | 419.66          | 388.88          | 1,716.11         |
| 221                          | 330.33          | 293.08          | 288.88          | 264.54          | 1,176.83         |
| 222                          | 124.95          | 134.59          | 133.07          | 142.77          | 535.38           |
| 223                          | 182.00          | 183.86          | 180.96          | 149.53          | 696.34           |
| 224                          | 300.94          | 278.03          | 286.46          | 283.18          | 1,148.61         |
| 225                          | 122.63          | 121.95          | 103.40          | 80.27           | 428.24           |
| 226                          | 374.66          | 349.67          | 387.07          | 312.88          | 1,424.28         |
| 227                          | 44.54           | 48.57           | 44.13           | 51.76           | 189.00           |
| 228                          | 247.65          | 249.28          | 247.57          | 244.07          | 988.56           |
| 229                          | 438.83          | 410.66          | 427.06          | 361.33          | 1,637.88         |
| 230                          | 265.62          | 219.30          | 209.99          | 186.71          | 881.62           |
| 231                          | 508.94          | 445.93          | 428.52          | 441.59          | 1,824.99         |
| 232                          | 1,223.17        | 1,120.99        | 900.94          | 833.02          | 4,078.11         |
| 233                          | 367.90          | 309.77          | 334.59          | 350.98          | 1,363.24         |
| 234                          | 843.42          | 765.22          | 722.28          | 725.97          | 3,056.89         |
| 235                          | 412.63          | 364.19          | 413.46          | 366.72          | 1,557.00         |
| 236                          | 494.06          | 391.53          | 419.23          | 369.74          | 1,674.56         |
| 237                          | 237.65          | 205.76          | 161.79          | 155.18          | 760.38           |
| 238                          | 221.52          | 233.06          | 208.32          | 215.70          | 878.60           |
| 239                          | 51.26           | 55.43           | 55.45           | 50.36           | 212.49           |
| 240                          | 526.00          | 519.65          | 449.36          | 468.93          | 1,963.93         |
| 241                          | 348.14          | 328.70          | 290.01          | 270.66          | 1,237.51         |
| 242                          | 173.35          | 155.07          | 197.31          | 200.09          | 725.82           |
| 243                          | 110.67          | 93.17           | 93.45           | 98.13           | 395.42           |
| 244                          | 130.49          | 135.22          | 124.86          | 123.61          | 514.19           |
| 245                          | 282.43          | 299.68          | 261.17          | 240.47          | 1,083.73         |
| 246                          | 44.46           | 58.09           | 60.06           | 55.80           | 218.41           |
| <b>VA - VIRGINIA - Total</b> | <b>9,794.87</b> | <b>9,103.35</b> | <b>8,605.45</b> | <b>8,259.04</b> | <b>35,762.70</b> |

**STATE: VI - VIRGIN ISLANDS**

| REGISTRANT ZIP CODE 3 | 1ST QUARTER | 2ND QUARTER | 3RD QUARTER | 4TH QUARTER | TOTAL GRAMS |
|-----------------------|-------------|-------------|-------------|-------------|-------------|
| 008                   | 10.86       | 13.30       | 16.31       | 13.83       | 54.30       |

|                                    |              |              |              |              |              |
|------------------------------------|--------------|--------------|--------------|--------------|--------------|
| <b>VI - VIRGIN ISLANDS - Total</b> | <b>10.86</b> | <b>13.30</b> | <b>16.31</b> | <b>13.83</b> | <b>54.30</b> |
|------------------------------------|--------------|--------------|--------------|--------------|--------------|

**STATE: VT - VERMONT**

| REGISTRANT ZIP CODE 3       | 1ST QUARTER     | 2ND QUARTER     | 3RD QUARTER   | 4TH QUARTER   | TOTAL GRAMS     |
|-----------------------------|-----------------|-----------------|---------------|---------------|-----------------|
| 050                         | 53.97           | 51.32           | 49.10         | 41.19         | 195.58          |
| 051                         | 48.90           | 44.32           | 38.04         | 34.68         | 165.94          |
| 052                         | 34.07           | 33.86           | 24.38         | 22.07         | 114.37          |
| 053                         | 32.12           | 33.35           | 41.44         | 26.70         | 133.62          |
| 054                         | 573.89          | 523.24          | 489.14        | 538.31        | 2,124.57        |
| 056                         | 115.35          | 126.85          | 122.89        | 114.00        | 479.08          |
| 057                         | 172.87          | 235.93          | 108.84        | 100.91        | 618.55          |
| 058                         | 44.06           | 38.57           | 42.01         | 42.13         | 166.76          |
| <b>VT - VERMONT - Total</b> | <b>1,075.22</b> | <b>1,087.44</b> | <b>915.83</b> | <b>919.98</b> | <b>3,998.48</b> |

**STATE: WA - WASHINGTON**

| REGISTRANT ZIP CODE 3          | 1ST QUARTER     | 2ND QUARTER     | 3RD QUARTER     | 4TH QUARTER     | TOTAL GRAMS      |
|--------------------------------|-----------------|-----------------|-----------------|-----------------|------------------|
| 980                            | 1,605.71        | 1,586.58        | 1,422.75        | 1,428.00        | 6,043.05         |
| 981                            | 1,807.34        | 1,317.16        | 1,252.07        | 1,191.64        | 5,568.22         |
| 982                            | 1,239.83        | 1,138.90        | 1,147.12        | 1,114.32        | 4,640.17         |
| 983                            | 749.25          | 740.04          | 710.35          | 737.64          | 2,937.28         |
| 984                            | 451.17          | 513.33          | 361.89          | 438.97          | 1,765.37         |
| 985                            | 646.15          | 620.21          | 628.92          | 609.83          | 2,505.11         |
| 986                            | 1,056.55        | 862.01          | 942.26          | 1,063.50        | 3,924.31         |
| 988                            | 164.02          | 178.75          | 165.90          | 163.24          | 671.91           |
| 989                            | 327.60          | 253.92          | 282.71          | 261.74          | 1,125.98         |
| 990                            | 83.47           | 77.28           | 95.82           | 94.23           | 350.80           |
| 991                            | 116.91          | 125.56          | 119.45          | 118.41          | 480.34           |
| 992                            | 900.45          | 1,044.45        | 734.31          | 701.06          | 3,380.28         |
| 993                            | 492.12          | 423.09          | 370.33          | 366.56          | 1,652.11         |
| 994                            | 74.92           | 61.65           | 60.34           | 44.65           | 241.55           |
| <b>WA - WASHINGTON - Total</b> | <b>9,715.50</b> | <b>8,942.94</b> | <b>8,294.23</b> | <b>8,333.80</b> | <b>35,286.47</b> |

**STATE: WI - WISCONSIN**

| REGISTRANT ZIP CODE 3 | 1ST QUARTER | 2ND QUARTER | 3RD QUARTER | 4TH QUARTER | TOTAL GRAMS |
|-----------------------|-------------|-------------|-------------|-------------|-------------|
| 530                   | 374.26      | 292.26      | 236.08      | 232.99      | 1,135.59    |
| 531                   | 403.95      | 369.24      | 311.59      | 227.65      | 1,312.43    |
| 532                   | 790.21      | 740.87      | 592.65      | 612.18      | 2,735.91    |
| 534                   | 60.92       | 44.58       | 67.69       | 62.15       | 235.35      |
| 535                   | 174.61      | 228.45      | 188.78      | 204.23      | 796.06      |
| 537                   | 286.95      | 215.91      | 190.66      | 210.16      | 903.68      |
| 538                   | 21.63       | 30.40       | 23.76       | 33.05       | 108.84      |
| 539                   | 63.31       | 76.59       | 69.87       | 61.20       | 270.97      |
| 540                   | 85.03       | 83.51       | 89.01       | 102.72      | 360.27      |

|                               |                 |                 |                 |                 |                  |
|-------------------------------|-----------------|-----------------|-----------------|-----------------|------------------|
| 541                           | 53.60           | 53.31           | 44.87           | 40.66           | 192.44           |
| 542                           | 61.03           | 86.28           | 20.87           | 18.08           | 186.25           |
| 543                           | 231.14          | 114.62          | 106.34          | 123.87          | 575.97           |
| 544                           | 163.01          | 135.16          | 164.81          | 141.04          | 604.02           |
| 545                           | 44.71           | 72.73           | 58.24           | 61.63           | 237.30           |
| 546                           | 171.56          | 147.83          | 132.31          | 99.62           | 551.32           |
| 547                           | 113.36          | 115.17          | 98.54           | 101.68          | 428.74           |
| 548                           | 172.65          | 138.32          | 136.69          | 121.60          | 569.25           |
| 549                           | 281.44          | 320.25          | 268.31          | 176.88          | 1,046.87         |
| <b>WI - WISCONSIN - Total</b> | <b>3,553.35</b> | <b>3,265.46</b> | <b>2,801.07</b> | <b>2,631.38</b> | <b>12,251.25</b> |

**STATE: WV - WEST VIRGINIA**

| REGISTRANT ZIP CODE 3             | 1ST QUARTER     | 2ND QUARTER     | 3RD QUARTER     | 4TH QUARTER     | TOTAL GRAMS     |
|-----------------------------------|-----------------|-----------------|-----------------|-----------------|-----------------|
| 247                               | 32.16           | 35.02           | 39.14           | 40.40           | 146.71          |
| 248                               | 5.32            | 5.67            | 4.79            | 5.50            | 21.28           |
| 249                               | 24.31           | 18.75           | 17.55           | 19.92           | 80.53           |
| 250                               | 6.92            | 9.75            | 6.92            | 4.68            | 28.26           |
| 251                               | 6.07            | 29.97           | 4.37            | 7.85            | 48.26           |
| 252                               | 6.38            | 4.79            | 4.78            | 3.64            | 19.58           |
| 253                               | 94.26           | 126.13          | 79.97           | 68.29           | 368.65          |
| 254                               | 324.44          | 317.08          | 320.58          | 283.50          | 1,245.60        |
| 255                               | 43.59           | 37.07           | 35.68           | 47.70           | 164.05          |
| 256                               | 11.53           | 9.18            | 9.54            | 4.30            | 34.54           |
| 257                               | 164.65          | 67.15           | 61.58           | 66.09           | 359.47          |
| 258                               | 80.93           | 48.97           | 52.45           | 54.72           | 237.07          |
| 259                               | 11.35           | 10.33           | 10.02           | 5.32            | 37.02           |
| 260                               | 65.01           | 54.69           | 47.73           | 47.40           | 214.83          |
| 261                               | 35.50           | 40.89           | 29.43           | 29.01           | 134.83          |
| 262                               | 16.69           | 24.21           | 14.58           | 14.57           | 70.04           |
| 263                               | 76.03           | 72.33           | 73.18           | 73.65           | 295.18          |
| 264                               | 20.33           | 16.82           | 22.01           | 22.83           | 81.99           |
| 265                               | 99.91           | 121.41          | 143.28          | 231.21          | 595.81          |
| 266                               | 5.87            | 9.94            | 12.89           | 7.06            | 35.77           |
| 267                               | 29.65           | 35.06           | 30.04           | 27.47           | 122.21          |
| 268                               | 20.37           | 22.79           | 20.29           | 18.69           | 82.14           |
| <b>WV - WEST VIRGINIA - Total</b> | <b>1,181.25</b> | <b>1,118.00</b> | <b>1,040.79</b> | <b>1,083.81</b> | <b>4,423.85</b> |

**STATE: WY - WYOMING**

| REGISTRANT ZIP CODE 3 | 1ST QUARTER | 2ND QUARTER | 3RD QUARTER | 4TH QUARTER | TOTAL GRAMS |
|-----------------------|-------------|-------------|-------------|-------------|-------------|
| 820                   | 126.29      | 134.07      | 109.46      | 102.89      | 472.70      |
| 822                   | 4.71        | 9.39        | 7.39        | 10.77       | 32.26       |
| 823                   | 6.67        | 9.53        | 7.05        | 4.15        | 27.40       |

|                             |               |               |               |               |                 |
|-----------------------------|---------------|---------------|---------------|---------------|-----------------|
| 824                         | 110.36        | 107.79        | 85.79         | 95.44         | 399.38          |
| 825                         | 37.22         | 32.19         | 26.28         | 31.61         | 127.30          |
| 826                         | 87.99         | 80.48         | 68.90         | 60.17         | 297.54          |
| 827                         | 39.09         | 37.27         | 42.93         | 21.49         | 140.78          |
| 828                         | 29.80         | 37.21         | 37.70         | 42.60         | 147.30          |
| 829                         | 92.84         | 92.71         | 77.27         | 91.86         | 354.68          |
| 830                         | 6.98          | 5.07          | 8.17          | 9.84          | 30.05           |
| 831                         | 20.08         | 18.52         | 13.56         | 23.18         | 75.34           |
| <b>WY - WYOMING - Total</b> | <b>562.03</b> | <b>564.22</b> | <b>484.48</b> | <b>494.00</b> | <b>2,104.73</b> |

**DRUG: 9193 - HYDROCODONE****STATE: AK - ALASKA**

| REGISTRANT ZIP CODE 3      | 1ST QUARTER     | 2ND QUARTER     | 3RD QUARTER     | 4TH QUARTER     | TOTAL GRAMS      |
|----------------------------|-----------------|-----------------|-----------------|-----------------|------------------|
| 995                        | 4,685.23        | 4,493.87        | 4,166.75        | 4,056.68        | 17,402.54        |
| 996                        | 3,228.83        | 3,153.17        | 3,133.12        | 2,934.89        | 12,450.01        |
| 997                        | 1,034.14        | 986.96          | 914.12          | 896.38          | 3,831.59         |
| 998                        | 481.58          | 437.36          | 443.63          | 420.81          | 1,783.37         |
| 999                        | 391.79          | 357.22          | 367.41          | 336.83          | 1,453.25         |
| <b>AK - ALASKA - Total</b> | <b>9,821.57</b> | <b>9,428.58</b> | <b>9,025.03</b> | <b>8,645.58</b> | <b>36,920.76</b> |

**STATE: AL - ALABAMA**

| REGISTRANT ZIP CODE 3       | 1ST QUARTER       | 2ND QUARTER       | 3RD QUARTER       | 4TH QUARTER       | TOTAL GRAMS       |
|-----------------------------|-------------------|-------------------|-------------------|-------------------|-------------------|
| 350                         | 25,179.18         | 24,443.33         | 23,566.32         | 23,206.14         | 96,394.96         |
| 351                         | 13,391.26         | 13,053.32         | 12,720.57         | 12,847.03         | 52,012.18         |
| 352                         | 22,108.33         | 21,010.41         | 20,495.30         | 20,320.65         | 83,934.69         |
| 354                         | 10,133.85         | 9,732.04          | 9,322.54          | 9,044.39          | 38,232.82         |
| 355                         | 10,580.61         | 10,272.78         | 10,260.94         | 10,253.64         | 41,367.97         |
| 356                         | 21,501.72         | 20,924.83         | 20,592.54         | 21,126.87         | 84,145.96         |
| 357                         | 8,956.43          | 8,305.27          | 7,869.69          | 8,063.63          | 33,195.02         |
| 358                         | 9,588.77          | 9,294.93          | 8,640.26          | 8,555.92          | 36,079.87         |
| 359                         | 18,763.83         | 19,018.86         | 18,614.18         | 18,434.24         | 74,831.11         |
| 360                         | 10,222.05         | 9,524.61          | 9,118.26          | 8,832.51          | 37,697.43         |
| 361                         | 8,019.43          | 7,462.92          | 7,212.11          | 6,681.28          | 29,375.74         |
| 362                         | 8,689.52          | 8,689.76          | 8,528.89          | 8,554.19          | 34,462.36         |
| 363                         | 8,606.62          | 8,467.70          | 8,314.55          | 8,054.07          | 33,442.94         |
| 364                         | 5,441.44          | 4,999.58          | 4,748.20          | 5,008.08          | 20,197.30         |
| 365                         | 17,534.26         | 16,373.58         | 15,865.09         | 15,687.97         | 65,460.90         |
| 366                         | 13,937.75         | 12,635.34         | 12,282.63         | 12,041.03         | 50,896.75         |
| 367                         | 2,970.03          | 2,808.66          | 2,791.69          | 2,799.22          | 11,369.60         |
| 368                         | 6,938.04          | 6,905.35          | 6,834.21          | 6,880.79          | 27,558.39         |
| 369                         | 786.94            | 852.06            | 828.45            | 866.23            | 3,333.68          |
| <b>AL - ALABAMA - Total</b> | <b>223,350.03</b> | <b>214,775.33</b> | <b>208,606.42</b> | <b>207,257.90</b> | <b>853,989.67</b> |

**STATE: AR - ARKANSAS**

| REGISTRANT ZIP CODE 3        | 1ST QUARTER       | 2ND QUARTER       | 3RD QUARTER       | 4TH QUARTER       | TOTAL GRAMS       |
|------------------------------|-------------------|-------------------|-------------------|-------------------|-------------------|
| 716                          | 5,381.50          | 5,165.57          | 5,094.39          | 4,991.58          | 20,633.03         |
| 717                          | 4,991.01          | 4,962.40          | 4,682.25          | 4,767.61          | 19,403.27         |
| 718                          | 7,314.10          | 7,013.02          | 7,111.83          | 6,927.02          | 28,365.97         |
| 719                          | 9,440.27          | 8,879.55          | 8,817.29          | 8,642.13          | 35,779.24         |
| 720                          | 11,398.20         | 11,082.60         | 10,749.00         | 10,693.28         | 43,923.07         |
| 721                          | 14,151.26         | 13,257.97         | 12,830.03         | 12,396.41         | 52,635.66         |
| 722                          | 7,318.05          | 6,664.50          | 6,534.09          | 6,490.56          | 27,007.20         |
| 723                          | 7,359.36          | 6,536.37          | 5,856.05          | 5,808.40          | 25,560.18         |
| 724                          | 11,101.27         | 10,532.75         | 9,923.21          | 9,381.83          | 40,939.06         |
| 725                          | 6,075.24          | 5,689.67          | 5,454.49          | 5,370.97          | 22,590.37         |
| 726                          | 5,451.07          | 5,153.01          | 4,798.56          | 4,842.08          | 20,244.72         |
| 727                          | 14,759.74         | 14,375.53         | 13,340.71         | 13,068.53         | 55,544.50         |
| 728                          | 3,977.78          | 3,982.76          | 3,814.24          | 3,590.08          | 15,364.86         |
| 729                          | 12,144.78         | 11,950.24         | 11,619.33         | 11,420.54         | 47,134.89         |
| <b>AR - ARKANSAS - Total</b> | <b>120,863.63</b> | <b>115,245.93</b> | <b>110,625.47</b> | <b>108,391.02</b> | <b>455,126.05</b> |

**STATE: AS - AMERICAN SAMOA**

| REGISTRANT ZIP CODE 3              | 1ST QUARTER | 2ND QUARTER | 3RD QUARTER | 4TH QUARTER | TOTAL GRAMS |
|------------------------------------|-------------|-------------|-------------|-------------|-------------|
| 967                                | 3.63        | 0           | 0           | 0           | 3.63        |
| <b>AS - AMERICAN SAMOA - Total</b> | <b>3.63</b> | <b>0.00</b> | <b>0.00</b> | <b>0.00</b> | <b>3.63</b> |

**STATE: AZ - ARIZONA**

| REGISTRANT ZIP CODE 3       | 1ST QUARTER      | 2ND QUARTER      | 3RD QUARTER      | 4TH QUARTER      | TOTAL GRAMS       |
|-----------------------------|------------------|------------------|------------------|------------------|-------------------|
| 850                         | 13,445.84        | 12,453.57        | 11,780.68        | 11,754.99        | 49,435.09         |
| 851                         | 5,277.26         | 4,599.31         | 4,349.60         | 4,700.31         | 18,926.48         |
| 852                         | 23,301.13        | 21,636.06        | 22,476.53        | 19,233.67        | 86,647.39         |
| 853                         | 16,364.24        | 14,632.97        | 13,727.34        | 14,799.18        | 59,523.72         |
| 855                         | 1,836.74         | 1,790.77         | 1,710.07         | 1,696.69         | 7,034.26          |
| 856                         | 3,481.23         | 3,361.17         | 3,178.96         | 3,194.50         | 13,215.85         |
| 857                         | 12,042.65        | 11,235.08        | 10,699.15        | 11,004.14        | 44,981.02         |
| 859                         | 2,078.02         | 2,224.91         | 2,182.80         | 2,114.69         | 8,600.41          |
| 860                         | 1,798.99         | 1,759.48         | 1,733.23         | 1,626.00         | 6,917.70          |
| 863                         | 6,177.20         | 6,220.34         | 5,933.01         | 5,870.85         | 24,201.39         |
| 864                         | 7,632.80         | 7,184.82         | 6,872.28         | 7,171.52         | 28,861.42         |
| 865                         | 84.46            | 93.20            | 96.38            | 90.97            | 365.01            |
| <b>AZ - ARIZONA - Total</b> | <b>93,520.55</b> | <b>87,191.66</b> | <b>84,740.02</b> | <b>83,257.51</b> | <b>348,709.74</b> |

**STATE: CA - CALIFORNIA**

| REGISTRANT ZIP CODE 3 | 1ST QUARTER | 2ND QUARTER | 3RD QUARTER | 4TH QUARTER | TOTAL GRAMS |
|-----------------------|-------------|-------------|-------------|-------------|-------------|
| 900                   | 18,281.95   | 17,803.84   | 17,029.70   | 16,089.12   | 69,204.62   |
| 902                   | 15,705.15   | 14,789.28   | 14,387.35   | 14,049.63   | 58,931.41   |

|     |           |           |           |           |                   |
|-----|-----------|-----------|-----------|-----------|-------------------|
| 903 | 1,519.77  | 1,473.96  | 1,503.71  | 1,550.25  | <b>6,047.69</b>   |
| 904 | 1,782.98  | 1,759.87  | 1,635.55  | 1,562.21  | <b>6,740.60</b>   |
| 905 | 3,635.94  | 3,662.37  | 3,528.45  | 3,401.72  | <b>14,228.48</b>  |
| 906 | 12,029.54 | 11,255.97 | 11,029.02 | 10,831.00 | <b>45,145.52</b>  |
| 907 | 11,528.48 | 11,074.73 | 10,832.33 | 10,306.66 | <b>43,742.19</b>  |
| 908 | 7,197.62  | 7,024.24  | 6,792.88  | 6,779.82  | <b>27,794.56</b>  |
| 910 | 3,970.25  | 3,809.12  | 3,721.45  | 3,535.16  | <b>15,035.97</b>  |
| 911 | 2,310.93  | 2,257.35  | 2,112.14  | 2,120.93  | <b>8,801.35</b>   |
| 912 | 3,268.25  | 3,179.99  | 3,054.17  | 2,808.65  | <b>12,311.06</b>  |
| 913 | 22,917.23 | 22,339.66 | 21,491.63 | 20,904.91 | <b>87,653.44</b>  |
| 914 | 6,159.75  | 6,131.35  | 5,810.62  | 5,900.59  | <b>24,002.31</b>  |
| 915 | 1,840.31  | 1,863.78  | 1,764.18  | 1,653.58  | <b>7,121.85</b>   |
| 916 | 1,300.41  | 1,334.33  | 1,231.26  | 1,297.00  | <b>5,163.00</b>   |
| 917 | 33,212.75 | 31,689.68 | 31,684.15 | 31,828.99 | <b>128,415.57</b> |
| 918 | 926.18    | 852.28    | 906.99    | 905.92    | <b>3,591.37</b>   |
| 919 | 7,823.25  | 7,621.19  | 7,385.23  | 7,031.95  | <b>29,861.62</b>  |
| 920 | 26,682.64 | 25,707.98 | 24,656.44 | 24,058.33 | <b>101,105.38</b> |
| 921 | 18,212.02 | 17,068.22 | 16,521.23 | 15,221.27 | <b>67,022.74</b>  |
| 922 | 19,165.55 | 18,199.14 | 17,375.91 | 17,257.30 | <b>71,997.90</b>  |
| 923 | 44,003.57 | 40,929.71 | 39,843.78 | 39,208.53 | <b>163,985.59</b> |
| 924 | 6,865.93  | 6,724.51  | 6,438.39  | 6,272.68  | <b>26,301.51</b>  |
| 925 | 37,697.37 | 36,373.85 | 35,704.93 | 34,345.99 | <b>144,122.14</b> |
| 926 | 22,026.65 | 21,073.59 | 20,480.83 | 19,917.60 | <b>83,498.67</b>  |
| 927 | 6,569.69  | 6,480.56  | 6,108.64  | 6,017.25  | <b>25,176.14</b>  |
| 928 | 23,012.82 | 22,095.65 | 21,482.65 | 21,232.46 | <b>87,823.57</b>  |
| 930 | 15,003.75 | 14,598.01 | 14,274.12 | 13,881.65 | <b>57,757.52</b>  |
| 931 | 2,604.70  | 2,522.32  | 2,296.66  | 2,268.84  | <b>9,692.52</b>   |
| 932 | 21,869.89 | 20,764.83 | 20,052.42 | 19,436.60 | <b>82,123.74</b>  |
| 933 | 18,565.63 | 17,995.85 | 17,276.18 | 17,385.79 | <b>71,223.46</b>  |
| 934 | 13,619.23 | 13,276.58 | 12,798.47 | 12,466.94 | <b>52,161.22</b>  |
| 935 | 16,883.71 | 15,933.10 | 15,275.41 | 14,983.42 | <b>63,075.64</b>  |
| 936 | 15,952.71 | 15,813.14 | 14,939.60 | 14,428.04 | <b>61,133.49</b>  |
| 937 | 18,570.52 | 18,025.81 | 17,697.90 | 18,101.40 | <b>72,395.63</b>  |
| 939 | 7,597.37  | 7,035.61  | 6,850.10  | 6,412.29  | <b>27,895.38</b>  |
| 940 | 8,495.65  | 8,463.23  | 8,064.53  | 7,934.87  | <b>32,958.28</b>  |
| 941 | 7,927.19  | 7,700.61  | 7,313.67  | 6,958.84  | <b>29,900.31</b>  |
| 943 | 1,865.47  | 1,748.36  | 1,661.65  | 1,587.47  | <b>6,862.95</b>   |
| 944 | 1,474.93  | 1,421.97  | 1,383.85  | 1,456.11  | <b>5,736.86</b>   |
| 945 | 56,354.79 | 53,853.06 | 52,122.23 | 51,435.01 | <b>213,765.09</b> |
| 946 | 8,423.94  | 7,030.49  | 7,018.41  | 6,911.71  | <b>29,384.55</b>  |

|                                |                   |                   |                   |                   |                     |
|--------------------------------|-------------------|-------------------|-------------------|-------------------|---------------------|
| 947                            | 1,403.92          | 1,320.43          | 1,305.77          | 1,170.83          | 5,200.95            |
| 948                            | 2,993.40          | 2,896.10          | 2,858.09          | 2,779.20          | 11,526.80           |
| 949                            | 7,796.28          | 7,266.45          | 7,404.70          | 6,829.48          | 29,296.91           |
| 950                            | 11,478.13         | 10,898.33         | 10,722.54         | 10,144.53         | 43,243.53           |
| 951                            | 8,102.94          | 8,041.54          | 7,669.58          | 7,238.52          | 31,052.58           |
| 952                            | 16,706.88         | 15,601.26         | 15,109.01         | 14,213.77         | 61,630.93           |
| 953                            | 44,444.59         | 43,066.48         | 40,117.03         | 39,425.00         | 167,053.09          |
| 954                            | 15,764.83         | 14,824.24         | 14,228.92         | 13,571.46         | 58,389.45           |
| 955                            | 7,410.19          | 7,112.43          | 6,845.55          | 6,254.45          | 27,622.61           |
| 956                            | 48,035.93         | 47,632.57         | 45,073.68         | 44,203.06         | 184,945.24          |
| 957                            | 8,637.66          | 8,225.73          | 7,715.35          | 7,419.72          | 31,998.48           |
| 958                            | 29,780.54         | 28,173.89         | 27,734.73         | 26,401.52         | 112,090.67          |
| 959                            | 29,722.72         | 28,046.55         | 25,999.97         | 24,153.10         | 107,922.34          |
| 960                            | 19,136.21         | 18,069.22         | 16,984.82         | 16,446.42         | 70,636.68           |
| 961                            | 2,731.73          | 2,619.67          | 2,516.43          | 2,499.78          | 10,367.62           |
| <b>CA - CALIFORNIA - Total</b> | <b>829,002.43</b> | <b>794,554.06</b> | <b>765,824.97</b> | <b>744,489.33</b> | <b>3,133,870.80</b> |

**STATE: CO - COLORADO**

| REGISTRANT ZIP CODE 3        | 1ST QUARTER      | 2ND QUARTER      | 3RD QUARTER      | 4TH QUARTER      | TOTAL GRAMS       |
|------------------------------|------------------|------------------|------------------|------------------|-------------------|
| 800                          | 8,222.23         | 7,622.88         | 8,314.32         | 8,334.59         | 32,494.03         |
| 801                          | 6,716.33         | 6,510.61         | 6,289.50         | 6,308.03         | 25,824.47         |
| 802                          | 9,205.31         | 8,946.21         | 7,428.62         | 7,348.51         | 32,928.65         |
| 803                          | 825.56           | 810.83           | 777.71           | 819.59           | 3,233.69          |
| 804                          | 2,105.90         | 1,718.64         | 1,790.96         | 1,696.80         | 7,312.30          |
| 805                          | 6,110.83         | 5,685.64         | 5,506.69         | 5,531.25         | 22,834.41         |
| 806                          | 2,438.37         | 2,303.23         | 2,185.62         | 2,217.08         | 9,144.30          |
| 807                          | 804.56           | 744.41           | 751.64           | 730.20           | 3,030.80          |
| 808                          | 1,530.52         | 1,481.18         | 1,413.92         | 1,382.82         | 5,808.43          |
| 809                          | 7,121.38         | 6,661.35         | 6,282.55         | 6,269.69         | 26,334.97         |
| 810                          | 5,128.35         | 5,012.78         | 4,853.62         | 4,633.21         | 19,627.95         |
| 811                          | 676.72           | 671.54           | 643.56           | 586.53           | 2,578.35          |
| 812                          | 1,308.13         | 1,260.18         | 1,228.30         | 1,183.15         | 4,979.76          |
| 813                          | 984.58           | 952.21           | 921.64           | 911.01           | 3,769.43          |
| 814                          | 1,037.89         | 969.83           | 882.72           | 892.56           | 3,783.00          |
| 815                          | 2,383.89         | 2,242.79         | 2,175.66         | 2,116.80         | 8,919.14          |
| 816                          | 1,383.51         | 1,246.68         | 1,208.47         | 1,207.76         | 5,046.41          |
| <b>CO - COLORADO - Total</b> | <b>57,984.06</b> | <b>54,840.98</b> | <b>52,655.47</b> | <b>52,169.59</b> | <b>217,650.10</b> |

**STATE: CT - CONNECTICUT**

| REGISTRANT ZIP CODE 3 | 1ST QUARTER | 2ND QUARTER | 3RD QUARTER | 4TH QUARTER | TOTAL GRAMS |
|-----------------------|-------------|-------------|-------------|-------------|-------------|
| 060                   | 3,923.90    | 3,587.35    | 3,373.05    | 3,544.94    | 14,429.25   |
| 061                   | 1,131.05    | 990.78      | 940.02      | 944.06      | 4,005.91    |

|                                 |                  |                  |                  |                  |                  |
|---------------------------------|------------------|------------------|------------------|------------------|------------------|
| 062                             | 890.32           | 827.56           | 808.48           | 837.21           | 3,363.56         |
| 063                             | 1,923.30         | 1,827.36         | 1,821.59         | 1,788.41         | 7,360.65         |
| 064                             | 4,305.31         | 3,999.79         | 3,948.27         | 3,930.91         | 16,184.28        |
| 065                             | 1,124.94         | 1,035.65         | 946.21           | 992.45           | 4,099.25         |
| 066                             | 789.98           | 747.95           | 750.07           | 691.03           | 2,979.02         |
| 067                             | 2,336.38         | 2,187.87         | 2,096.65         | 2,123.37         | 8,744.27         |
| 068                             | 1,434.11         | 1,324.50         | 1,302.71         | 1,239.75         | 5,301.07         |
| 069                             | 262.62           | 232.35           | 232.26           | 249.54           | 976.77           |
| <b>CT - CONNECTICUT - Total</b> | <b>18,121.90</b> | <b>16,761.16</b> | <b>16,219.30</b> | <b>16,341.67</b> | <b>67,444.03</b> |

**STATE: DC - DISTRICT OF COLUMBIA**

| REGISTRANT ZIP CODE 3              | 1ST QUARTER     | 2ND QUARTER     | 3RD QUARTER     | 4TH QUARTER     | TOTAL GRAMS     |
|------------------------------------|-----------------|-----------------|-----------------|-----------------|-----------------|
| 200                                | 1,231.72        | 1,061.68        | 1,003.86        | 986.43          | 4,283.69        |
| 203                                | 15.14           | 5.75            | 6.96            | 6.05            | 33.90           |
| 204                                | 110.79          | 43.59           | 67.20           | 61.15           | 282.72          |
| 205                                | 0               | 0.30            | 0               | 1.36            | 1.66            |
| <b>DC - DISTRICT OF COLUMBIA -</b> | <b>1,357.64</b> | <b>1,111.33</b> | <b>1,078.02</b> | <b>1,054.99</b> | <b>4,601.98</b> |

**STATE: DE - DELAWARE**

| REGISTRANT ZIP CODE 3        | 1ST QUARTER     | 2ND QUARTER     | 3RD QUARTER     | 4TH QUARTER     | TOTAL GRAMS      |
|------------------------------|-----------------|-----------------|-----------------|-----------------|------------------|
| 197                          | 1,459.85        | 1,462.03        | 1,393.63        | 1,359.95        | 5,675.46         |
| 198                          | 927.90          | 947.87          | 903.73          | 946.17          | 3,725.67         |
| 199                          | 2,786.22        | 2,724.42        | 2,610.05        | 2,540.50        | 10,661.20        |
| <b>DE - DELAWARE - Total</b> | <b>5,173.97</b> | <b>5,134.33</b> | <b>4,907.42</b> | <b>4,846.62</b> | <b>20,062.33</b> |

**STATE: FL - FLORIDA**

| REGISTRANT ZIP CODE 3 | 1ST QUARTER | 2ND QUARTER | 3RD QUARTER | 4TH QUARTER | TOTAL GRAMS |
|-----------------------|-------------|-------------|-------------|-------------|-------------|
| 320                   | 18,178.67   | 17,052.10   | 15,138.80   | 15,078.47   | 65,448.03   |
| 321                   | 21,041.71   | 19,806.46   | 17,194.44   | 17,565.96   | 75,608.58   |
| 322                   | 31,763.56   | 30,219.49   | 26,577.57   | 26,387.26   | 114,947.88  |
| 323                   | 7,762.13    | 7,175.05    | 6,300.86    | 6,363.32    | 27,601.36   |
| 324                   | 16,502.44   | 15,826.92   | 14,554.88   | 12,948.84   | 59,833.07   |
| 325                   | 25,348.72   | 24,031.85   | 22,237.78   | 21,583.65   | 93,202.01   |
| 326                   | 6,077.14    | 5,724.86    | 5,135.24    | 5,118.69    | 22,055.94   |
| 327                   | 18,521.32   | 17,427.56   | 14,718.47   | 15,262.36   | 65,929.71   |
| 328                   | 8,599.09    | 7,801.56    | 6,432.44    | 6,642.85    | 29,475.94   |
| 329                   | 15,348.39   | 14,272.13   | 12,259.65   | 12,721.03   | 54,601.20   |
| 330                   | 8,796.47    | 7,942.38    | 6,639.69    | 6,518.22    | 29,896.77   |
| 331                   | 4,518.05    | 4,099.31    | 3,454.32    | 3,402.70    | 15,474.37   |
| 333                   | 6,243.29    | 5,696.40    | 4,606.87    | 4,670.59    | 21,217.14   |
| 334                   | 13,848.49   | 12,871.98   | 10,654.31   | 11,039.51   | 48,414.28   |
| 335                   | 12,268.51   | 11,344.89   | 9,677.44    | 9,917.72    | 43,208.55   |
| 336                   | 12,120.37   | 11,483.57   | 9,435.64    | 9,756.05    | 42,795.63   |



|                             |                   |                   |                   |                   |                     |
|-----------------------------|-------------------|-------------------|-------------------|-------------------|---------------------|
| 337                         | 17,628.45         | 16,582.68         | 14,133.46         | 14,397.83         | 62,742.43           |
| 338                         | 12,467.41         | 10,914.93         | 9,039.66          | 9,598.30          | 42,020.31           |
| 339                         | 14,705.36         | 13,136.36         | 11,068.43         | 11,779.09         | 50,689.24           |
| 341                         | 4,774.24          | 3,554.46          | 2,795.24          | 3,371.63          | 14,495.57           |
| 342                         | 17,505.23         | 15,411.20         | 12,873.15         | 13,633.39         | 59,422.97           |
| 344                         | 13,136.06         | 12,314.60         | 10,425.78         | 10,567.10         | 46,443.53           |
| 346                         | 17,222.48         | 16,164.95         | 14,435.80         | 13,960.56         | 61,783.80           |
| 347                         | 8,611.64          | 7,917.47          | 6,485.69          | 6,728.53          | 29,743.33           |
| 349                         | 7,185.67          | 6,618.85          | 5,736.96          | 5,864.59          | 25,406.06           |
| <b>FL - FLORIDA - Total</b> | <b>340,174.90</b> | <b>315,391.99</b> | <b>272,012.56</b> | <b>274,878.25</b> | <b>1,202,457.69</b> |

**STATE: GA - GEORGIA**

| REGISTRANT ZIP CODE 3       | 1ST QUARTER       | 2ND QUARTER       | 3RD QUARTER       | 4TH QUARTER       | TOTAL GRAMS       |
|-----------------------------|-------------------|-------------------|-------------------|-------------------|-------------------|
| 300                         | 28,270.50         | 26,780.97         | 25,186.28         | 25,311.19         | 105,548.95        |
| 301                         | 30,645.09         | 29,592.37         | 28,195.15         | 28,467.72         | 116,900.33        |
| 302                         | 18,449.32         | 17,548.25         | 16,800.98         | 16,897.46         | 69,696.01         |
| 303                         | 5,660.57          | 5,435.95          | 5,057.87          | 5,206.95          | 21,361.33         |
| 304                         | 6,146.72          | 5,780.88          | 5,459.08          | 5,459.82          | 22,846.50         |
| 305                         | 19,091.81         | 18,771.70         | 17,999.57         | 18,472.14         | 74,335.23         |
| 306                         | 13,580.11         | 12,777.64         | 11,985.33         | 12,313.46         | 50,656.53         |
| 307                         | 10,956.62         | 10,674.14         | 10,262.35         | 10,133.82         | 42,026.93         |
| 308                         | 2,636.31          | 2,404.26          | 2,264.16          | 2,285.03          | 9,589.76          |
| 309                         | 5,498.76          | 4,549.44          | 4,898.91          | 4,323.46          | 19,270.58         |
| 310                         | 20,983.23         | 19,922.04         | 18,681.80         | 18,892.32         | 78,479.40         |
| 312                         | 7,637.17          | 7,435.69          | 7,095.10          | 7,298.45          | 29,466.41         |
| 313                         | 4,388.16          | 4,273.28          | 4,031.81          | 3,885.80          | 16,579.05         |
| 314                         | 4,379.35          | 4,157.66          | 3,918.79          | 3,831.57          | 16,287.38         |
| 315                         | 15,282.81         | 14,651.05         | 14,340.50         | 13,966.90         | 58,241.26         |
| 316                         | 8,297.29          | 8,324.18          | 7,846.25          | 7,910.25          | 32,377.97         |
| 317                         | 10,417.21         | 10,009.12         | 9,757.82          | 9,642.95          | 39,827.10         |
| 318                         | 1,110.55          | 1,219.72          | 1,120.54          | 1,160.92          | 4,611.74          |
| 319                         | 5,870.53          | 5,334.61          | 5,600.86          | 5,284.51          | 22,090.51         |
| 398                         | 3,274.03          | 3,312.25          | 2,957.86          | 3,099.83          | 12,643.96         |
| <b>GA - GEORGIA - Total</b> | <b>222,576.16</b> | <b>212,955.19</b> | <b>203,461.01</b> | <b>203,844.55</b> | <b>842,836.92</b> |

**STATE: GU - GUAM**

| REGISTRANT ZIP CODE 3    | 1ST QUARTER   | 2ND QUARTER   | 3RD QUARTER   | 4TH QUARTER   | TOTAL GRAMS   |
|--------------------------|---------------|---------------|---------------|---------------|---------------|
| 969                      | 142.59        | 101.24        | 135.95        | 116.67        | 496.46        |
| <b>GU - GUAM - Total</b> | <b>142.59</b> | <b>101.24</b> | <b>135.95</b> | <b>116.67</b> | <b>496.46</b> |

**STATE: HI - HAWAII**

| REGISTRANT ZIP CODE 3 | 1ST QUARTER | 2ND QUARTER | 3RD QUARTER | 4TH QUARTER | TOTAL GRAMS |
|-----------------------|-------------|-------------|-------------|-------------|-------------|
| 967                   | 12,175.50   | 11,526.88   | 10,755.66   | 10,550.65   | 45,008.69   |

|                            |                  |                  |                  |                  |                  |
|----------------------------|------------------|------------------|------------------|------------------|------------------|
| 968                        | 4,128.86         | 4,043.67         | 3,650.38         | 3,579.63         | 15,402.53        |
| <b>HI - HAWAII - Total</b> | <b>16,304.36</b> | <b>15,570.55</b> | <b>14,406.04</b> | <b>14,130.27</b> | <b>60,411.22</b> |

**STATE: IA - IOWA**

| REGISTRANT ZIP CODE 3    | 1ST QUARTER      | 2ND QUARTER      | 3RD QUARTER      | 4TH QUARTER      | TOTAL GRAMS       |
|--------------------------|------------------|------------------|------------------|------------------|-------------------|
| 500                      | 3,804.61         | 3,717.12         | 3,600.91         | 3,667.20         | 14,789.84         |
| 501                      | 3,469.53         | 3,445.46         | 3,286.25         | 3,331.19         | 13,532.43         |
| 502                      | 3,525.27         | 3,312.36         | 3,260.85         | 3,236.92         | 13,335.40         |
| 503                      | 8,168.83         | 8,021.88         | 7,749.49         | 7,697.65         | 31,637.85         |
| 504                      | 1,791.96         | 1,637.95         | 1,558.41         | 1,571.89         | 6,560.20          |
| 505                      | 1,815.48         | 1,853.50         | 1,755.67         | 1,756.12         | 7,180.77          |
| 506                      | 1,600.16         | 1,568.08         | 1,532.85         | 1,596.96         | 6,298.05          |
| 507                      | 1,319.30         | 1,312.22         | 1,191.19         | 1,170.64         | 4,993.36          |
| 508                      | 649.15           | 636.62           | 591.78           | 605.95           | 2,483.50          |
| 510                      | 918.92           | 812.35           | 833.76           | 860.06           | 3,425.09          |
| 511                      | 2,049.64         | 1,930.85         | 1,928.01         | 1,881.52         | 7,790.02          |
| 512                      | 442.93           | 405.97           | 358.65           | 377.99           | 1,585.54          |
| 513                      | 694.56           | 614.34           | 617.27           | 631.28           | 2,557.44          |
| 514                      | 669.11           | 641.84           | 637.58           | 634.62           | 2,583.14          |
| 515                      | 2,273.56         | 2,172.52         | 2,026.08         | 2,006.71         | 8,478.86          |
| 516                      | 433.02           | 450.55           | 379.91           | 424.22           | 1,687.71          |
| 520                      | 1,643.79         | 1,531.21         | 1,491.60         | 1,478.87         | 6,145.47          |
| 521                      | 522.39           | 454.16           | 440.85           | 426.80           | 1,844.19          |
| 522                      | 2,275.72         | 2,150.89         | 1,962.38         | 1,937.74         | 8,326.73          |
| 523                      | 1,289.17         | 1,157.90         | 1,137.13         | 1,075.05         | 4,659.25          |
| 524                      | 2,107.39         | 1,859.34         | 1,816.27         | 1,716.97         | 7,499.97          |
| 525                      | 2,644.32         | 2,590.21         | 2,363.86         | 2,406.60         | 10,004.99         |
| 526                      | 2,074.97         | 1,941.73         | 1,958.58         | 1,973.16         | 7,948.44          |
| 527                      | 1,831.34         | 1,748.14         | 1,654.55         | 1,607.57         | 6,841.60          |
| 528                      | 2,362.80         | 2,290.81         | 2,224.16         | 2,174.64         | 9,052.40          |
| <b>IA - IOWA - Total</b> | <b>50,377.92</b> | <b>48,258.00</b> | <b>46,358.03</b> | <b>46,248.30</b> | <b>191,242.24</b> |

**STATE: ID - IDAHO**

| REGISTRANT ZIP CODE 3     | 1ST QUARTER      | 2ND QUARTER      | 3RD QUARTER      | 4TH QUARTER      | TOTAL GRAMS       |
|---------------------------|------------------|------------------|------------------|------------------|-------------------|
| 832                       | 5,265.29         | 5,308.49         | 5,191.53         | 5,232.65         | 20,997.96         |
| 833                       | 6,318.72         | 6,159.73         | 6,007.24         | 5,824.53         | 24,310.22         |
| 834                       | 4,399.87         | 4,335.65         | 4,269.16         | 4,285.16         | 17,289.84         |
| 835                       | 3,463.53         | 3,451.09         | 3,142.84         | 3,236.68         | 13,294.15         |
| 836                       | 14,809.13        | 14,375.12        | 13,921.75        | 13,577.91        | 56,683.91         |
| 837                       | 9,224.97         | 8,842.55         | 8,712.55         | 8,387.97         | 35,168.03         |
| 838                       | 8,717.15         | 8,492.02         | 8,132.74         | 7,979.08         | 33,320.99         |
| <b>ID - IDAHO - Total</b> | <b>52,198.65</b> | <b>50,964.65</b> | <b>49,377.82</b> | <b>48,523.97</b> | <b>201,065.09</b> |

**STATE: IL - ILLINOIS**

| REGISTRANT ZIP CODE 3        | 1ST QUARTER       | 2ND QUARTER       | 3RD QUARTER       | 4TH QUARTER       | TOTAL GRAMS         |
|------------------------------|-------------------|-------------------|-------------------|-------------------|---------------------|
| 600                          | 32,082.91         | 30,891.27         | 29,510.98         | 29,919.87         | 122,405.04          |
| 601                          | 27,558.63         | 26,825.87         | 25,644.23         | 26,048.77         | 106,077.51          |
| 602                          | 876.39            | 816.84            | 800.23            | 858.88            | 3,352.34            |
| 603                          | 1,224.70          | 1,255.02          | 1,206.90          | 1,140.96          | 4,827.58            |
| 604                          | 35,402.69         | 34,175.34         | 32,591.10         | 32,763.36         | 134,932.50          |
| 605                          | 16,859.96         | 16,378.27         | 15,619.77         | 15,783.20         | 64,641.20           |
| 606                          | 29,110.73         | 27,645.45         | 26,362.17         | 26,479.75         | 109,598.10          |
| 607                          | 2,919.92          | 2,822.03          | 2,718.31          | 2,745.78          | 11,206.04           |
| 608                          | 2,245.50          | 2,202.64          | 2,088.84          | 2,048.33          | 8,585.31            |
| 609                          | 5,412.10          | 5,273.45          | 4,923.16          | 5,022.88          | 20,631.59           |
| 610                          | 5,727.25          | 5,642.55          | 5,630.09          | 5,594.57          | 22,594.47           |
| 611                          | 8,958.47          | 8,894.22          | 8,563.35          | 8,552.86          | 34,968.90           |
| 612                          | 2,997.04          | 2,758.03          | 2,657.01          | 2,531.37          | 10,943.44           |
| 613                          | 3,809.50          | 3,833.59          | 3,508.18          | 3,678.06          | 14,829.33           |
| 614                          | 3,781.27          | 3,580.50          | 3,399.72          | 3,320.45          | 14,081.94           |
| 615                          | 4,671.82          | 4,656.97          | 4,389.25          | 4,489.04          | 18,207.08           |
| 616                          | 7,163.53          | 6,711.99          | 6,717.84          | 6,756.61          | 27,349.97           |
| 617                          | 4,287.35          | 4,048.48          | 4,023.72          | 4,040.28          | 16,399.83           |
| 618                          | 7,922.04          | 7,313.28          | 7,192.68          | 7,031.43          | 29,459.44           |
| 619                          | 2,341.20          | 2,103.56          | 2,015.76          | 1,940.88          | 8,401.40            |
| 620                          | 10,834.29         | 10,150.77         | 9,821.90          | 9,568.64          | 40,375.60           |
| 622                          | 9,886.47          | 9,671.50          | 9,018.14          | 9,038.43          | 37,614.53           |
| 623                          | 3,450.51          | 3,344.67          | 3,143.33          | 3,209.06          | 13,147.55           |
| 624                          | 4,010.75          | 3,807.92          | 3,644.50          | 3,579.52          | 15,042.70           |
| 625                          | 4,912.38          | 4,730.64          | 4,309.67          | 4,574.14          | 18,526.83           |
| 626                          | 4,344.61          | 4,067.70          | 3,708.95          | 3,650.42          | 15,771.69           |
| 627                          | 5,365.22          | 5,275.20          | 4,858.45          | 4,681.47          | 20,180.35           |
| 628                          | 7,095.04          | 6,705.93          | 6,637.17          | 6,579.57          | 27,017.71           |
| 629                          | 15,548.91         | 14,785.20         | 14,381.26         | 14,182.27         | 58,897.64           |
| <b>IL - ILLINOIS - Total</b> | <b>270,801.21</b> | <b>260,368.88</b> | <b>249,086.69</b> | <b>249,810.82</b> | <b>1,030,067.59</b> |

**STATE: IN - INDIANA**

| REGISTRANT ZIP CODE 3 | 1ST QUARTER | 2ND QUARTER | 3RD QUARTER | 4TH QUARTER | TOTAL GRAMS |
|-----------------------|-------------|-------------|-------------|-------------|-------------|
| 460                   | 12,919.05   | 12,039.67   | 11,937.28   | 12,012.44   | 48,908.44   |
| 461                   | 16,821.18   | 16,043.70   | 17,423.74   | 17,555.89   | 67,844.50   |
| 462                   | 29,171.09   | 28,371.35   | 25,835.67   | 26,040.76   | 109,418.87  |
| 463                   | 25,806.55   | 24,334.22   | 23,533.49   | 24,000.81   | 97,675.07   |
| 464                   | 3,099.80    | 2,965.98    | 3,034.30    | 2,897.24    | 11,997.33   |
| 465                   | 9,201.04    | 8,631.26    | 8,353.07    | 8,459.56    | 34,644.93   |

|                             |                   |                   |                   |                   |                   |
|-----------------------------|-------------------|-------------------|-------------------|-------------------|-------------------|
| 466                         | 3,333.46          | 3,088.76          | 2,952.36          | 2,795.44          | 12,170.03         |
| 467                         | 5,742.17          | 5,604.74          | 5,380.33          | 5,317.96          | 22,045.20         |
| 468                         | 7,362.85          | 7,003.86          | 6,934.34          | 7,111.98          | 28,413.04         |
| 469                         | 11,948.98         | 11,508.53         | 10,937.05         | 10,860.26         | 45,254.82         |
| 470                         | 3,013.34          | 2,991.75          | 2,997.04          | 2,906.71          | 11,908.84         |
| 471                         | 15,002.12         | 14,052.90         | 13,380.29         | 13,272.64         | 55,707.95         |
| 472                         | 6,634.16          | 6,358.32          | 5,980.06          | 6,058.62          | 25,031.16         |
| 473                         | 12,381.45         | 11,951.19         | 11,513.23         | 11,862.18         | 47,708.04         |
| 474                         | 8,163.66          | 7,812.91          | 7,251.82          | 7,268.06          | 30,496.45         |
| 475                         | 6,425.54          | 6,251.49          | 5,783.92          | 5,810.14          | 24,271.09         |
| 476                         | 4,547.05          | 4,386.91          | 4,266.33          | 4,186.42          | 17,386.71         |
| 477                         | 11,187.92         | 10,771.68         | 10,339.72         | 10,124.36         | 42,423.68         |
| 478                         | 4,537.15          | 4,270.30          | 4,070.07          | 4,144.74          | 17,022.26         |
| 479                         | 8,862.76          | 8,355.49          | 8,131.68          | 7,842.43          | 33,192.35         |
| <b>IN - INDIANA - Total</b> | <b>206,161.32</b> | <b>196,794.99</b> | <b>190,035.80</b> | <b>190,528.67</b> | <b>783,520.77</b> |

**STATE: KS - KANSAS**

| REGISTRANT ZIP CODE 3      | 1ST QUARTER      | 2ND QUARTER      | 3RD QUARTER      | 4TH QUARTER      | TOTAL GRAMS       |
|----------------------------|------------------|------------------|------------------|------------------|-------------------|
| 660                        | 9,540.51         | 9,110.07         | 8,782.10         | 8,964.41         | 36,397.09         |
| 661                        | 2,993.11         | 2,818.46         | 2,539.02         | 2,609.37         | 10,959.95         |
| 662                        | 7,087.61         | 7,012.23         | 6,725.75         | 6,826.11         | 27,651.70         |
| 664                        | 1,279.10         | 1,136.49         | 1,107.67         | 1,020.68         | 4,543.94          |
| 665                        | 1,715.46         | 1,740.91         | 1,603.07         | 1,629.72         | 6,689.16          |
| 666                        | 4,019.45         | 3,893.01         | 3,781.40         | 3,667.72         | 15,361.58         |
| 667                        | 4,431.73         | 4,242.77         | 4,109.35         | 4,219.52         | 17,003.38         |
| 668                        | 1,204.76         | 1,115.28         | 1,052.20         | 1,094.40         | 4,466.64          |
| 669                        | 605.43           | 592.78           | 547.07           | 573.04           | 2,318.31          |
| 670                        | 5,872.22         | 5,668.87         | 5,455.58         | 5,422.15         | 22,418.82         |
| 671                        | 3,133.65         | 2,831.47         | 2,723.61         | 2,688.20         | 11,376.94         |
| 672                        | 16,584.28        | 16,156.38        | 15,622.07        | 15,435.72        | 63,798.44         |
| 673                        | 2,340.05         | 2,276.77         | 2,111.24         | 1,974.83         | 8,702.89          |
| 674                        | 4,088.87         | 3,977.25         | 3,880.18         | 3,862.90         | 15,809.20         |
| 675                        | 3,283.69         | 3,115.23         | 2,988.26         | 2,915.63         | 12,302.81         |
| 676                        | 1,260.31         | 1,170.94         | 1,097.69         | 1,078.72         | 4,607.65          |
| 677                        | 606.00           | 594.98           | 526.08           | 536.27           | 2,263.32          |
| 678                        | 2,129.79         | 2,143.13         | 2,053.83         | 2,025.46         | 8,352.21          |
| 679                        | 910.15           | 808.24           | 843.26           | 812.78           | 3,374.44          |
| <b>KS - KANSAS - Total</b> | <b>73,086.15</b> | <b>70,405.26</b> | <b>67,549.43</b> | <b>67,357.62</b> | <b>278,398.45</b> |

**STATE: KY - KENTUCKY**

| REGISTRANT ZIP CODE 3 | 1ST QUARTER | 2ND QUARTER | 3RD QUARTER | 4TH QUARTER | TOTAL GRAMS |
|-----------------------|-------------|-------------|-------------|-------------|-------------|
| 400                   | 7,662.13    | 7,104.34    | 6,758.21    | 6,823.18    | 28,347.85   |

|                              |                   |                   |                   |                   |                   |
|------------------------------|-------------------|-------------------|-------------------|-------------------|-------------------|
| 401                          | 4,457.31          | 4,302.62          | 4,217.27          | 3,838.94          | 16,816.13         |
| 402                          | 33,952.83         | 31,759.34         | 29,708.75         | 30,142.69         | 125,563.60        |
| 403                          | 10,658.49         | 10,246.92         | 9,828.86          | 9,953.13          | 40,687.40         |
| 404                          | 6,768.91          | 6,560.38          | 6,349.18          | 6,435.28          | 26,113.75         |
| 405                          | 6,938.15          | 6,846.90          | 6,768.29          | 6,526.61          | 27,079.95         |
| 406                          | 1,848.24          | 1,763.72          | 1,693.27          | 1,642.54          | 6,947.77          |
| 407                          | 6,004.59          | 5,800.69          | 5,762.44          | 5,814.09          | 23,381.80         |
| 408                          | 1,612.10          | 1,607.84          | 1,543.31          | 1,629.93          | 6,393.18          |
| 409                          | 7,589.90          | 7,131.45          | 7,365.72          | 7,376.42          | 29,463.49         |
| 410                          | 9,499.45          | 9,053.13          | 8,771.47          | 8,976.65          | 36,300.71         |
| 411                          | 3,483.96          | 3,410.78          | 3,197.54          | 3,219.45          | 13,311.73         |
| 412                          | 2,932.94          | 2,730.19          | 2,787.94          | 2,910.18          | 11,361.26         |
| 413                          | 2,849.52          | 2,751.79          | 2,775.21          | 2,815.31          | 11,191.84         |
| 414                          | 1,145.32          | 1,251.99          | 1,239.05          | 1,370.29          | 5,006.65          |
| 415                          | 6,158.82          | 5,748.06          | 5,579.62          | 5,580.22          | 23,066.72         |
| 416                          | 4,153.65          | 4,143.07          | 4,210.33          | 4,420.22          | 16,927.27         |
| 417                          | 4,548.97          | 4,550.17          | 4,474.84          | 4,388.99          | 17,962.97         |
| 418                          | 1,959.12          | 1,941.90          | 1,948.26          | 1,880.64          | 7,729.91          |
| 420                          | 13,104.12         | 12,759.64         | 12,266.58         | 12,006.94         | 50,137.29         |
| 421                          | 11,840.65         | 11,932.76         | 11,554.26         | 11,612.68         | 46,940.35         |
| 422                          | 6,116.72          | 5,953.57          | 5,936.17          | 5,845.92          | 23,852.38         |
| 423                          | 8,989.63          | 8,733.95          | 8,339.97          | 8,578.90          | 34,642.45         |
| 424                          | 9,029.88          | 8,781.85          | 8,605.89          | 8,332.17          | 34,749.79         |
| 425                          | 2,679.68          | 2,697.30          | 2,599.86          | 2,691.03          | 10,667.87         |
| 426                          | 3,639.98          | 3,314.89          | 3,369.65          | 3,606.51          | 13,931.03         |
| 427                          | 8,465.90          | 8,184.21          | 8,129.63          | 8,185.87          | 32,965.60         |
| <b>KY - KENTUCKY - Total</b> | <b>188,090.96</b> | <b>181,063.43</b> | <b>175,781.57</b> | <b>176,604.80</b> | <b>721,540.77</b> |

**STATE: LA - LOUISIANA**

| REGISTRANT ZIP CODE 3 | 1ST QUARTER | 2ND QUARTER | 3RD QUARTER | 4TH QUARTER | TOTAL GRAMS |
|-----------------------|-------------|-------------|-------------|-------------|-------------|
| 700                   | 15,202.70   | 13,544.13   | 13,030.68   | 12,770.16   | 54,547.67   |
| 701                   | 6,465.37    | 5,991.67    | 5,772.40    | 5,513.78    | 23,743.22   |
| 703                   | 9,869.58    | 9,082.27    | 8,708.46    | 8,345.57    | 36,005.88   |
| 704                   | 15,093.68   | 14,288.55   | 14,065.26   | 14,026.07   | 57,473.56   |
| 705                   | 24,620.00   | 24,675.27   | 23,631.08   | 24,168.11   | 97,094.46   |
| 706                   | 6,971.10    | 6,914.29    | 6,859.67    | 6,870.05    | 27,615.12   |
| 707                   | 12,842.38   | 12,134.67   | 12,162.58   | 12,246.04   | 49,385.67   |
| 708                   | 10,866.48   | 10,035.54   | 9,888.33    | 9,279.78    | 40,070.14   |
| 710                   | 4,399.49    | 4,127.68    | 4,110.41    | 4,261.56    | 16,899.15   |
| 711                   | 12,922.41   | 12,452.92   | 12,189.63   | 12,128.61   | 49,693.57   |
| 712                   | 10,780.79   | 10,014.69   | 9,909.36    | 10,143.45   | 40,848.29   |

|                               |                   |                   |                   |                   |                   |
|-------------------------------|-------------------|-------------------|-------------------|-------------------|-------------------|
| 713                           | 12,263.06         | 11,630.28         | 11,232.16         | 11,345.47         | <b>46,470.97</b>  |
| 714                           | 4,905.70          | 4,876.34          | 4,648.84          | 4,571.87          | <b>19,002.74</b>  |
| <b>LA - LOUISIANA - Total</b> | <b>147,202.74</b> | <b>139,768.31</b> | <b>136,208.86</b> | <b>135,670.52</b> | <b>558,850.42</b> |

**STATE: MA - MASSACHUSETTS**

| REGISTRANT ZIP CODE 3             | 1ST QUARTER      | 2ND QUARTER      | 3RD QUARTER      | 4TH QUARTER      | TOTAL GRAMS       |
|-----------------------------------|------------------|------------------|------------------|------------------|-------------------|
| 010                               | 1,979.85         | 1,928.68         | 1,852.47         | 1,856.53         | <b>7,617.52</b>   |
| 011                               | 449.66           | 429.70           | 400.92           | 406.12           | <b>1,686.40</b>   |
| 012                               | 603.11           | 580.09           | 564.13           | 527.25           | <b>2,274.58</b>   |
| 013                               | 342.22           | 324.03           | 315.01           | 311.65           | <b>1,292.92</b>   |
| 014                               | 1,179.55         | 1,037.29         | 995.57           | 1,016.32         | <b>4,228.73</b>   |
| 015                               | 1,720.01         | 1,725.16         | 1,495.05         | 1,557.23         | <b>6,497.44</b>   |
| 016                               | 1,107.21         | 1,000.61         | 997.65           | 949.91           | <b>4,055.37</b>   |
| 017                               | 1,308.19         | 1,199.28         | 1,150.10         | 1,138.80         | <b>4,796.37</b>   |
| 018                               | 5,052.54         | 4,741.46         | 4,286.41         | 4,386.01         | <b>18,466.42</b>  |
| 019                               | 2,382.54         | 2,296.41         | 2,290.70         | 2,176.24         | <b>9,145.88</b>   |
| 020                               | 1,255.58         | 1,106.05         | 1,106.35         | 1,142.61         | <b>4,610.59</b>   |
| 021                               | 2,935.67         | 2,822.59         | 2,629.59         | 2,672.80         | <b>11,060.64</b>  |
| 022                               | 51.24            | 48.32            | 48.04            | 44.21            | <b>191.81</b>     |
| 023                               | 1,887.30         | 1,830.65         | 1,701.97         | 1,738.78         | <b>7,158.70</b>   |
| 024                               | 749.11           | 709.77           | 631.14           | 689.55           | <b>2,779.57</b>   |
| 025                               | 515.54           | 480.13           | 485.95           | 485.79           | <b>1,967.41</b>   |
| 026                               | 840.50           | 810.08           | 781.98           | 758.17           | <b>3,190.73</b>   |
| 027                               | 2,893.44         | 2,754.51         | 2,620.40         | 2,545.50         | <b>10,813.84</b>  |
| <b>MA - MASSACHUSETTS - Total</b> | <b>27,253.25</b> | <b>25,824.79</b> | <b>24,353.43</b> | <b>24,403.47</b> | <b>101,834.93</b> |

**STATE: MD - MARYLAND**

| REGISTRANT ZIP CODE 3        | 1ST QUARTER      | 2ND QUARTER      | 3RD QUARTER      | 4TH QUARTER      | TOTAL GRAMS       |
|------------------------------|------------------|------------------|------------------|------------------|-------------------|
| 206                          | 2,450.01         | 2,459.20         | 2,319.84         | 2,389.04         | <b>9,618.10</b>   |
| 207                          | 2,764.61         | 2,509.18         | 2,445.90         | 2,301.05         | <b>10,020.74</b>  |
| 208                          | 2,283.98         | 2,187.43         | 1,927.17         | 2,006.01         | <b>8,404.59</b>   |
| 209                          | 563.60           | 478.66           | 450.12           | 452.23           | <b>1,944.61</b>   |
| 210                          | 5,027.14         | 4,818.76         | 4,567.60         | 4,601.54         | <b>19,015.04</b>  |
| 211                          | 2,558.65         | 2,371.21         | 2,257.62         | 2,263.87         | <b>9,451.35</b>   |
| 212                          | 5,440.94         | 5,132.42         | 4,809.25         | 5,019.09         | <b>20,401.70</b>  |
| 214                          | 661.45           | 562.59           | 550.81           | 560.97           | <b>2,335.82</b>   |
| 215                          | 1,970.63         | 1,900.77         | 1,712.66         | 1,749.56         | <b>7,333.62</b>   |
| 216                          | 1,222.42         | 1,235.25         | 1,180.69         | 1,212.16         | <b>4,850.51</b>   |
| 217                          | 3,468.22         | 3,807.20         | 3,232.74         | 3,149.52         | <b>13,657.67</b>  |
| 218                          | 1,296.53         | 1,122.82         | 1,163.77         | 1,113.50         | <b>4,696.62</b>   |
| 219                          | 547.12           | 538.08           | 529.92           | 487.01           | <b>2,102.13</b>   |
| <b>MD - MARYLAND - Total</b> | <b>30,255.29</b> | <b>29,123.57</b> | <b>27,148.09</b> | <b>27,305.54</b> | <b>113,832.50</b> |

**STATE: ME - MAINE**

| REGISTRANT ZIP CODE 3     | 1ST QUARTER      | 2ND QUARTER      | 3RD QUARTER      | 4TH QUARTER      | TOTAL GRAMS      |
|---------------------------|------------------|------------------|------------------|------------------|------------------|
| 039                       | 183.71           | 151.22           | 171.88           | 150.41           | 657.22           |
| 040                       | 3,978.53         | 3,931.43         | 3,899.78         | 3,771.74         | 15,581.48        |
| 041                       | 869.45           | 836.49           | 845.17           | 816.87           | 3,367.98         |
| 042                       | 2,034.90         | 1,888.21         | 1,876.94         | 1,819.72         | 7,619.77         |
| 043                       | 1,786.93         | 1,776.28         | 1,649.76         | 1,694.65         | 6,907.63         |
| 044                       | 1,738.96         | 1,601.77         | 1,566.56         | 1,542.88         | 6,450.17         |
| 045                       | 516.55           | 466.54           | 488.12           | 483.40           | 1,954.61         |
| 046                       | 1,027.79         | 988.62           | 971.94           | 928.00           | 3,916.36         |
| 047                       | 1,057.66         | 1,023.81         | 973.66           | 960.58           | 4,015.71         |
| 048                       | 444.72           | 446.48           | 447.26           | 409.58           | 1,748.04         |
| 049                       | 2,144.77         | 2,051.49         | 2,044.26         | 1,925.70         | 8,166.22         |
| <b>ME - MAINE - Total</b> | <b>15,783.98</b> | <b>15,162.34</b> | <b>14,935.32</b> | <b>14,503.53</b> | <b>60,385.18</b> |

**STATE: MI - MICHIGAN**

| REGISTRANT ZIP CODE 3        | 1ST QUARTER       | 2ND QUARTER       | 3RD QUARTER       | 4TH QUARTER       | TOTAL GRAMS         |
|------------------------------|-------------------|-------------------|-------------------|-------------------|---------------------|
| 480                          | 44,949.18         | 42,447.20         | 39,135.22         | 38,828.36         | 165,359.96          |
| 481                          | 57,765.79         | 53,050.87         | 49,445.43         | 49,374.06         | 209,636.14          |
| 482                          | 24,921.25         | 22,724.02         | 20,610.86         | 20,385.49         | 88,641.62           |
| 483                          | 29,140.85         | 26,668.45         | 24,571.81         | 24,954.30         | 105,335.41          |
| 484                          | 16,058.08         | 15,015.81         | 14,035.49         | 13,784.60         | 58,893.98           |
| 485                          | 10,139.99         | 9,137.52          | 8,637.37          | 8,491.01          | 36,405.90           |
| 486                          | 17,749.34         | 16,488.72         | 15,514.92         | 15,013.53         | 64,766.51           |
| 487                          | 9,239.42          | 8,327.89          | 7,732.56          | 7,747.99          | 33,047.87           |
| 488                          | 17,513.39         | 16,094.17         | 15,233.90         | 15,115.62         | 63,957.09           |
| 489                          | 7,350.14          | 6,659.56          | 6,220.65          | 6,048.15          | 26,278.50           |
| 490                          | 23,486.77         | 21,346.31         | 19,884.23         | 19,798.13         | 84,515.43           |
| 491                          | 2,330.25          | 2,083.55          | 2,129.63          | 2,023.49          | 8,566.92            |
| 492                          | 10,537.33         | 9,414.46          | 8,557.45          | 8,381.88          | 36,891.12           |
| 493                          | 7,483.81          | 6,905.64          | 6,747.64          | 6,616.04          | 27,753.13           |
| 494                          | 18,766.09         | 17,738.90         | 16,577.60         | 16,204.26         | 69,286.85           |
| 495                          | 13,754.98         | 12,543.49         | 11,913.38         | 11,863.22         | 50,075.08           |
| 496                          | 9,296.56          | 8,705.33          | 8,366.09          | 8,041.66          | 34,409.64           |
| 497                          | 7,731.08          | 7,284.68          | 6,887.92          | 6,455.49          | 28,359.17           |
| 498                          | 6,848.14          | 6,275.91          | 6,097.23          | 5,802.29          | 25,023.57           |
| 499                          | 2,162.10          | 1,914.70          | 1,832.89          | 1,740.07          | 7,649.77            |
| <b>MI - MICHIGAN - Total</b> | <b>337,224.55</b> | <b>310,827.19</b> | <b>290,132.27</b> | <b>286,669.65</b> | <b>1,224,853.66</b> |

**STATE: MN - MINNESOTA**

| REGISTRANT ZIP CODE 3 | 1ST QUARTER | 2ND QUARTER | 3RD QUARTER | 4TH QUARTER | TOTAL GRAMS |
|-----------------------|-------------|-------------|-------------|-------------|-------------|
| 550                   | 3,987.02    | 3,830.91    | 3,793.02    | 3,651.37    | 15,262.33   |

|                               |                  |                  |                  |                  |                   |
|-------------------------------|------------------|------------------|------------------|------------------|-------------------|
| 551                           | 4,354.69         | 4,140.58         | 3,911.36         | 3,942.73         | 16,349.36         |
| 553                           | 5,416.38         | 5,180.37         | 5,081.72         | 4,971.05         | 20,649.52         |
| 554                           | 6,799.26         | 6,508.68         | 6,173.94         | 6,248.11         | 25,729.99         |
| 556                           | 230.26           | 191.87           | 212.44           | 179.97           | 814.53            |
| 557                           | 2,897.71         | 2,844.59         | 2,752.54         | 2,657.47         | 11,152.31         |
| 558                           | 2,080.44         | 2,075.55         | 1,959.08         | 1,914.24         | 8,029.31          |
| 559                           | 1,712.92         | 1,599.70         | 1,563.30         | 1,409.25         | 6,285.17          |
| 560                           | 1,683.70         | 1,520.74         | 1,501.16         | 1,429.89         | 6,135.48          |
| 561                           | 676.32           | 668.56           | 643.13           | 626.94           | 2,614.94          |
| 562                           | 1,286.68         | 1,229.12         | 1,149.43         | 1,160.81         | 4,826.04          |
| 563                           | 3,198.30         | 3,045.62         | 2,990.29         | 2,913.78         | 12,147.98         |
| 564                           | 1,521.56         | 1,515.54         | 1,452.76         | 1,385.26         | 5,875.12          |
| 565                           | 1,707.96         | 1,628.09         | 1,622.27         | 1,503.47         | 6,461.79          |
| 566                           | 1,061.07         | 1,032.38         | 1,034.03         | 946.79           | 4,074.27          |
| 567                           | 768.50           | 692.98           | 656.14           | 693.97           | 2,811.60          |
| <b>MN - MINNESOTA - Total</b> | <b>39,382.77</b> | <b>37,705.28</b> | <b>36,496.62</b> | <b>35,635.09</b> | <b>149,219.75</b> |

**STATE: MO - MISSOURI**

| REGISTRANT ZIP CODE 3 | 1ST QUARTER | 2ND QUARTER | 3RD QUARTER | 4TH QUARTER | TOTAL GRAMS |
|-----------------------|-------------|-------------|-------------|-------------|-------------|
| 630                   | 14,983.24   | 14,243.23   | 13,435.10   | 13,304.02   | 55,965.60   |
| 631                   | 18,571.95   | 18,483.55   | 18,150.47   | 17,668.30   | 72,874.27   |
| 633                   | 8,661.58    | 8,263.24    | 8,026.52    | 7,821.54    | 32,772.88   |
| 634                   | 1,816.08    | 1,731.20    | 1,684.08    | 1,694.49    | 6,925.85    |
| 635                   | 1,606.21    | 1,564.12    | 1,367.54    | 1,378.33    | 5,916.20    |
| 636                   | 6,181.29    | 5,954.67    | 5,594.07    | 5,277.73    | 23,007.76   |
| 637                   | 4,538.35    | 4,384.17    | 4,137.05    | 3,801.01    | 16,860.58   |
| 638                   | 8,340.91    | 8,204.33    | 8,153.38    | 7,712.66    | 32,411.28   |
| 639                   | 5,651.50    | 5,329.80    | 4,979.96    | 5,052.61    | 21,013.87   |
| 640                   | 15,106.93   | 14,626.05   | 14,138.20   | 14,107.85   | 57,979.03   |
| 641                   | 11,428.87   | 10,594.49   | 10,096.87   | 9,849.43    | 41,969.67   |
| 644                   | 1,861.79    | 1,801.93    | 1,618.72    | 1,667.29    | 6,949.72    |
| 645                   | 3,820.66    | 3,625.17    | 3,406.44    | 3,224.85    | 14,077.12   |
| 646                   | 1,365.64    | 1,220.08    | 1,163.72    | 1,121.97    | 4,871.41    |
| 647                   | 3,794.20    | 3,478.35    | 3,342.48    | 3,288.82    | 13,903.84   |
| 648                   | 6,238.19    | 5,977.05    | 5,582.80    | 5,624.72    | 23,422.76   |
| 650                   | 2,953.92    | 2,902.16    | 2,769.55    | 2,680.74    | 11,306.38   |
| 651                   | 1,413.59    | 1,309.73    | 1,227.63    | 1,260.10    | 5,211.05    |
| 652                   | 4,068.10    | 3,892.00    | 3,805.83    | 3,771.27    | 15,537.20   |
| 653                   | 2,132.18    | 1,992.69    | 1,917.99    | 1,928.17    | 7,971.03    |
| 654                   | 1,976.85    | 1,868.83    | 1,779.34    | 1,711.30    | 7,336.31    |
| 655                   | 3,424.39    | 3,175.75    | 3,091.81    | 3,070.74    | 12,762.68   |



|                              |                   |                   |                   |                   |                   |
|------------------------------|-------------------|-------------------|-------------------|-------------------|-------------------|
| 656                          | 6,502.86          | 6,304.97          | 5,854.60          | 5,906.30          | <b>24,568.73</b>  |
| 657                          | 9,888.75          | 9,536.32          | 9,196.84          | 9,052.44          | <b>37,674.35</b>  |
| 658                          | 8,959.72          | 8,628.15          | 8,564.79          | 7,990.37          | <b>34,143.02</b>  |
| <b>MO - MISSOURI - Total</b> | <b>155,287.75</b> | <b>149,092.02</b> | <b>143,085.79</b> | <b>139,967.05</b> | <b>587,432.60</b> |

**STATE: MS - MISSISSIPPI**

| REGISTRANT ZIP CODE 3           | 1ST QUARTER      | 2ND QUARTER      | 3RD QUARTER      | 4TH QUARTER      | TOTAL GRAMS       |
|---------------------------------|------------------|------------------|------------------|------------------|-------------------|
| 386                             | 9,192.02         | 8,389.49         | 7,924.36         | 7,772.59         | <b>33,278.45</b>  |
| 387                             | 2,556.01         | 2,376.15         | 2,404.62         | 2,344.70         | <b>9,681.47</b>   |
| 388                             | 10,975.42        | 10,680.27        | 10,173.16        | 10,145.32        | <b>41,974.17</b>  |
| 389                             | 3,026.61         | 2,946.44         | 2,681.66         | 2,653.36         | <b>11,308.07</b>  |
| 390                             | 6,380.19         | 6,025.50         | 5,793.00         | 5,460.63         | <b>23,659.32</b>  |
| 391                             | 6,626.55         | 6,118.16         | 6,164.09         | 6,102.99         | <b>25,011.78</b>  |
| 392                             | 6,683.20         | 6,022.88         | 5,842.16         | 5,453.10         | <b>24,001.34</b>  |
| 393                             | 9,491.90         | 8,824.74         | 8,083.56         | 7,666.87         | <b>34,067.07</b>  |
| 394                             | 18,148.08        | 16,626.91        | 16,122.23        | 15,408.95        | <b>66,306.16</b>  |
| 395                             | 16,837.82        | 15,939.43        | 14,625.31        | 13,762.47        | <b>61,165.03</b>  |
| 396                             | 4,639.47         | 4,177.37         | 4,023.05         | 4,017.74         | <b>16,857.63</b>  |
| 397                             | 4,476.49         | 4,119.90         | 4,187.77         | 3,966.39         | <b>16,750.56</b>  |
| <b>MS - MISSISSIPPI - Total</b> | <b>99,033.75</b> | <b>92,247.24</b> | <b>88,024.95</b> | <b>84,755.11</b> | <b>364,061.06</b> |

**STATE: MT - MONTANA**

| REGISTRANT ZIP CODE 3       | 1ST QUARTER      | 2ND QUARTER      | 3RD QUARTER      | 4TH QUARTER      | TOTAL GRAMS      |
|-----------------------------|------------------|------------------|------------------|------------------|------------------|
| 590                         | 1,175.82         | 1,070.40         | 1,098.58         | 1,058.33         | <b>4,403.12</b>  |
| 591                         | 3,300.25         | 3,061.41         | 3,017.34         | 2,948.62         | <b>12,327.62</b> |
| 592                         | 488.16           | 472.12           | 440.32           | 444.97           | <b>1,845.56</b>  |
| 593                         | 690.57           | 649.68           | 638.25           | 635.31           | <b>2,613.80</b>  |
| 594                         | 2,766.69         | 2,632.57         | 2,622.12         | 2,598.05         | <b>10,619.42</b> |
| 595                         | 598.21           | 547.98           | 567.51           | 515.27           | <b>2,228.96</b>  |
| 596                         | 2,681.27         | 2,591.97         | 2,551.35         | 2,193.15         | <b>10,017.73</b> |
| 597                         | 2,652.65         | 2,588.88         | 2,556.17         | 2,575.46         | <b>10,373.17</b> |
| 598                         | 5,746.76         | 5,469.74         | 5,324.64         | 5,293.58         | <b>21,834.74</b> |
| 599                         | 3,644.91         | 3,518.50         | 3,540.78         | 3,428.28         | <b>14,132.46</b> |
| <b>MT - MONTANA - Total</b> | <b>23,745.27</b> | <b>22,603.24</b> | <b>22,357.05</b> | <b>21,691.01</b> | <b>90,396.57</b> |

**STATE: NC - NORTH CAROLINA**

| REGISTRANT ZIP CODE 3 | 1ST QUARTER | 2ND QUARTER | 3RD QUARTER | 4TH QUARTER | TOTAL GRAMS      |
|-----------------------|-------------|-------------|-------------|-------------|------------------|
| 270                   | 6,593.29    | 6,033.24    | 5,822.09    | 5,997.17    | <b>24,445.79</b> |
| 271                   | 4,447.70    | 4,185.36    | 3,955.32    | 4,316.14    | <b>16,904.52</b> |
| 272                   | 11,258.88   | 10,303.68   | 9,788.45    | 10,321.40   | <b>41,672.41</b> |
| 273                   | 6,338.55    | 6,045.96    | 5,783.27    | 6,385.23    | <b>24,553.02</b> |
| 274                   | 3,938.00    | 3,565.78    | 3,476.96    | 3,555.25    | <b>14,535.99</b> |
| 275                   | 12,337.37   | 11,544.71   | 10,993.17   | 11,881.76   | <b>46,757.02</b> |

|                                    |                   |                   |                   |                   |                   |
|------------------------------------|-------------------|-------------------|-------------------|-------------------|-------------------|
| 276                                | 4,181.68          | 3,732.51          | 3,620.63          | 3,922.86          | 15,457.68         |
| 277                                | 3,192.85          | 2,875.03          | 2,562.48          | 2,530.00          | 11,160.35         |
| 278                                | 7,874.53          | 7,394.92          | 7,334.42          | 7,547.57          | 30,151.44         |
| 279                                | 2,370.53          | 2,390.65          | 2,302.58          | 2,483.91          | 9,547.66          |
| 280                                | 18,732.46         | 17,097.92         | 16,619.20         | 17,489.06         | 69,938.63         |
| 281                                | 13,708.72         | 12,447.29         | 12,087.91         | 12,618.08         | 50,862.00         |
| 282                                | 9,535.96          | 8,191.56          | 7,736.06          | 8,028.61          | 33,492.19         |
| 283                                | 14,889.56         | 13,886.90         | 13,504.77         | 14,460.80         | 56,742.02         |
| 284                                | 9,401.49          | 9,014.32          | 8,432.94          | 9,256.51          | 36,105.25         |
| 285                                | 7,088.86          | 6,629.50          | 6,253.55          | 6,790.34          | 26,762.24         |
| 286                                | 16,648.03         | 15,901.59         | 15,503.51         | 15,890.74         | 63,943.87         |
| 287                                | 9,388.92          | 8,934.94          | 8,608.48          | 8,671.06          | 35,603.40         |
| 288                                | 4,828.60          | 4,228.25          | 3,925.83          | 3,802.13          | 16,784.81         |
| 289                                | 1,498.07          | 1,395.93          | 1,403.12          | 1,462.32          | 5,759.44          |
| <b>NC - NORTH CAROLINA - Total</b> | <b>168,254.03</b> | <b>155,800.03</b> | <b>149,714.73</b> | <b>157,410.94</b> | <b>631,179.73</b> |

**STATE: ND - NORTH DAKOTA**

| REGISTRANT ZIP CODE 3            | 1ST QUARTER     | 2ND QUARTER     | 3RD QUARTER     | 4TH QUARTER     | TOTAL GRAMS      |
|----------------------------------|-----------------|-----------------|-----------------|-----------------|------------------|
| 580                              | 506.33          | 450.98          | 451.99          | 452.09          | 1,861.38         |
| 581                              | 1,719.14        | 1,547.61        | 1,565.92        | 1,472.33        | 6,305.01         |
| 582                              | 1,043.42        | 1,044.18        | 1,027.31        | 970.85          | 4,085.76         |
| 583                              | 578.81          | 591.61          | 575.72          | 530.95          | 2,277.09         |
| 584                              | 490.45          | 503.27          | 487.64          | 501.55          | 1,982.91         |
| 585                              | 3,153.59        | 2,924.14        | 2,916.20        | 2,869.71        | 11,863.64        |
| 586                              | 620.44          | 574.27          | 597.06          | 555.25          | 2,347.02         |
| 587                              | 665.32          | 646.51          | 663.09          | 603.34          | 2,578.26         |
| 588                              | 562.22          | 524.29          | 560.47          | 563.15          | 2,210.13         |
| <b>ND - NORTH DAKOTA - Total</b> | <b>9,339.72</b> | <b>8,806.86</b> | <b>8,845.41</b> | <b>8,519.22</b> | <b>35,511.20</b> |

**STATE: NE - NEBRASKA**

| REGISTRANT ZIP CODE 3 | 1ST QUARTER | 2ND QUARTER | 3RD QUARTER | 4TH QUARTER | TOTAL GRAMS |
|-----------------------|-------------|-------------|-------------|-------------|-------------|
| 680                   | 3,121.28    | 3,047.63    | 2,984.55    | 2,919.14    | 12,072.59   |
| 681                   | 9,673.14    | 9,393.83    | 8,825.45    | 8,813.39    | 36,705.81   |
| 683                   | 1,221.04    | 1,213.86    | 1,106.83    | 1,135.36    | 4,677.09    |
| 684                   | 857.33      | 850.81      | 831.08      | 813.46      | 3,352.69    |
| 685                   | 4,420.66    | 4,413.31    | 4,202.53    | 4,200.99    | 17,237.49   |
| 686                   | 688.20      | 709.46      | 695.48      | 699.59      | 2,792.73    |
| 687                   | 1,668.72    | 1,664.70    | 1,584.49    | 1,567.76    | 6,485.66    |
| 688                   | 2,605.42    | 2,546.34    | 2,432.89    | 2,369.53    | 9,954.18    |
| 689                   | 1,054.76    | 994.85      | 1,055.58    | 1,030.81    | 4,135.99    |
| 690                   | 473.75      | 382.15      | 398.36      | 428.37      | 1,682.63    |
| 691                   | 1,427.98    | 1,335.14    | 1,214.60    | 1,255.86    | 5,233.58    |

|                              |                  |                  |                  |                  |                   |
|------------------------------|------------------|------------------|------------------|------------------|-------------------|
| 692                          | 124.41           | 135.65           | 125.62           | 101.78           | 487.46            |
| 693                          | 1,033.95         | 1,047.95         | 929.38           | 947.36           | 3,958.65          |
| <b>NE - NEBRASKA - Total</b> | <b>28,370.64</b> | <b>27,735.66</b> | <b>26,386.85</b> | <b>26,283.41</b> | <b>108,776.55</b> |

**STATE: NH - NEW HAMPSHIRE**

| REGISTRANT ZIP CODE 3             | 1ST QUARTER     | 2ND QUARTER     | 3RD QUARTER     | 4TH QUARTER     | TOTAL GRAMS      |
|-----------------------------------|-----------------|-----------------|-----------------|-----------------|------------------|
| 030                               | 1,926.74        | 1,864.19        | 1,826.40        | 1,890.33        | 7,507.65         |
| 031                               | 1,215.23        | 1,095.27        | 1,042.84        | 1,091.72        | 4,445.05         |
| 032                               | 995.05          | 926.00          | 903.09          | 939.56          | 3,763.70         |
| 033                               | 608.06          | 600.01          | 594.39          | 554.96          | 2,357.41         |
| 034                               | 470.30          | 438.23          | 446.71          | 431.65          | 1,786.88         |
| 035                               | 272.90          | 265.24          | 277.59          | 255.55          | 1,071.29         |
| 036                               | 29.16           | 27.89           | 29.99           | 28.95           | 115.98           |
| 037                               | 388.73          | 360.02          | 356.74          | 367.30          | 1,472.79         |
| 038                               | 2,336.07        | 2,118.87        | 2,118.75        | 2,041.83        | 8,615.53         |
| <b>NH - NEW HAMPSHIRE - Total</b> | <b>8,242.23</b> | <b>7,695.72</b> | <b>7,596.49</b> | <b>7,601.84</b> | <b>31,136.29</b> |

**STATE: NJ - NEW JERSEY**

| REGISTRANT ZIP CODE 3          | 1ST QUARTER      | 2ND QUARTER      | 3RD QUARTER      | 4TH QUARTER      | TOTAL GRAMS       |
|--------------------------------|------------------|------------------|------------------|------------------|-------------------|
| 070                            | 3,541.21         | 3,320.98         | 2,920.79         | 3,197.17         | 12,980.16         |
| 071                            | 298.69           | 272.47           | 255.38           | 248.54           | 1,075.08          |
| 072                            | 194.42           | 178.16           | 175.75           | 173.19           | 721.53            |
| 073                            | 273.45           | 313.66           | 293.43           | 269.34           | 1,149.89          |
| 074                            | 1,844.67         | 1,740.13         | 1,718.91         | 1,792.43         | 7,096.14          |
| 075                            | 250.21           | 209.77           | 179.40           | 233.17           | 872.55            |
| 076                            | 1,214.16         | 1,026.14         | 1,092.83         | 1,139.67         | 4,472.80          |
| 077                            | 2,641.27         | 2,465.04         | 2,334.25         | 2,456.15         | 9,896.70          |
| 078                            | 1,625.34         | 1,523.70         | 1,481.20         | 1,552.39         | 6,182.62          |
| 079                            | 633.73           | 528.34           | 545.78           | 555.64           | 2,263.49          |
| 080                            | 7,250.72         | 6,939.11         | 6,508.05         | 6,532.02         | 27,229.89         |
| 081                            | 534.25           | 528.69           | 481.53           | 481.01           | 2,025.49          |
| 082                            | 1,895.16         | 1,727.51         | 1,795.05         | 1,589.26         | 7,006.98          |
| 083                            | 1,538.46         | 1,514.72         | 1,459.44         | 1,441.25         | 5,953.87          |
| 084                            | 274.02           | 237.07           | 234.51           | 244.81           | 990.42            |
| 085                            | 852.92           | 730.48           | 702.06           | 701.51           | 2,986.96          |
| 086                            | 914.00           | 878.15           | 800.62           | 845.99           | 3,438.76          |
| 087                            | 2,139.52         | 1,949.41         | 1,916.11         | 1,856.49         | 7,861.53          |
| 088                            | 2,443.45         | 2,283.74         | 2,093.00         | 2,202.29         | 9,022.47          |
| 089                            | 149.30           | 167.63           | 122.08           | 119.89           | 558.90            |
| <b>NJ - NEW JERSEY - Total</b> | <b>30,508.96</b> | <b>28,534.89</b> | <b>27,110.18</b> | <b>27,632.20</b> | <b>113,786.23</b> |

**STATE: NM - NEW MEXICO**

| REGISTRANT ZIP CODE 3 | 1ST QUARTER | 2ND QUARTER | 3RD QUARTER | 4TH QUARTER | TOTAL GRAMS |
|-----------------------|-------------|-------------|-------------|-------------|-------------|
|-----------------------|-------------|-------------|-------------|-------------|-------------|

|                                |                  |                  |                  |                  |                   |
|--------------------------------|------------------|------------------|------------------|------------------|-------------------|
| 870                            | 2,467.58         | 2,319.14         | 2,250.31         | 2,281.81         | 9,318.85          |
| 871                            | 11,216.95        | 10,343.90        | 10,123.83        | 10,085.80        | 41,770.48         |
| 873                            | 612.31           | 533.22           | 535.25           | 528.42           | 2,209.20          |
| 874                            | 1,601.01         | 1,473.23         | 1,493.81         | 1,412.96         | 5,981.01          |
| 875                            | 3,703.65         | 3,607.64         | 3,471.14         | 3,557.19         | 14,339.62         |
| 877                            | 854.89           | 767.25           | 775.06           | 760.78           | 3,157.97          |
| 878                            | 232.29           | 207.18           | 218.85           | 238.22           | 896.54            |
| 879                            | 245.02           | 222.05           | 191.94           | 202.18           | 861.19            |
| 880                            | 2,707.75         | 2,609.06         | 2,436.48         | 2,527.11         | 10,280.40         |
| 881                            | 1,294.45         | 1,230.76         | 1,161.12         | 1,165.93         | 4,852.26          |
| 882                            | 5,754.97         | 5,483.29         | 5,215.56         | 5,207.00         | 21,660.81         |
| 883                            | 1,427.86         | 1,395.51         | 1,365.37         | 1,383.61         | 5,572.34          |
| 884                            | 207.08           | 233.28           | 226.46           | 231.96           | 898.78            |
| <b>NM - NEW MEXICO - Total</b> | <b>32,325.82</b> | <b>30,425.51</b> | <b>29,465.17</b> | <b>29,582.97</b> | <b>121,799.47</b> |

**STATE: NV - NEVADA**

| REGISTRANT ZIP CODE 3      | 1ST QUARTER      | 2ND QUARTER      | 3RD QUARTER      | 4TH QUARTER      | TOTAL GRAMS       |
|----------------------------|------------------|------------------|------------------|------------------|-------------------|
| 890                        | 20,355.19        | 19,600.05        | 19,031.05        | 18,956.74        | 77,943.03         |
| 891                        | 40,514.97        | 38,103.36        | 37,358.69        | 36,113.26        | 152,090.28        |
| 893                        | 458.29           | 468.93           | 413.32           | 424.93           | 1,765.47          |
| 894                        | 7,266.91         | 7,185.63         | 6,714.94         | 6,803.04         | 27,970.51         |
| 895                        | 7,345.27         | 7,191.74         | 7,084.80         | 6,875.61         | 28,497.42         |
| 897                        | 2,376.07         | 2,414.81         | 2,332.12         | 2,249.26         | 9,372.26          |
| 898                        | 858.27           | 876.14           | 862.22           | 827.55           | 3,424.18          |
| <b>NV - NEVADA - Total</b> | <b>79,174.96</b> | <b>75,840.66</b> | <b>73,797.14</b> | <b>72,250.39</b> | <b>301,063.15</b> |

**STATE: NY - NEW YORK**

| REGISTRANT ZIP CODE 3 | 1ST QUARTER | 2ND QUARTER | 3RD QUARTER | 4TH QUARTER | TOTAL GRAMS |
|-----------------------|-------------|-------------|-------------|-------------|-------------|
| 063                   | 0.30        | 0           | 0.30        | 0.30        | 0.91        |
| 100                   | 3,540.55    | 3,475.71    | 3,158.50    | 3,281.51    | 13,456.27   |
| 101                   | 220.64      | 174.46      | 142.92      | 208.10      | 746.12      |
| 102                   | 12.77       | 9.64        | 5.42        | 10.03       | 37.85       |
| 103                   | 2,269.55    | 2,247.15    | 2,125.49    | 2,263.01    | 8,905.20    |
| 104                   | 1,345.40    | 1,268.58    | 1,155.76    | 1,130.78    | 4,900.52    |
| 105                   | 2,241.88    | 2,068.61    | 1,937.97    | 1,979.83    | 8,228.30    |
| 106                   | 303.78      | 271.88      | 246.58      | 224.53      | 1,046.77    |
| 107                   | 736.68      | 696.39      | 571.64      | 578.62      | 2,583.33    |
| 108                   | 217.64      | 197.34      | 193.28      | 212.12      | 820.38      |
| 109                   | 2,312.66    | 2,269.94    | 2,042.91    | 2,184.23    | 8,809.75    |
| 110                   | 921.91      | 862.67      | 834.99      | 862.43      | 3,481.99    |
| 111                   | 461.64      | 446.40      | 373.66      | 416.63      | 1,698.33    |
| 112                   | 3,548.26    | 3,324.46    | 3,002.62    | 3,185.92    | 13,061.26   |

|                              |                   |                   |                   |                   |                   |
|------------------------------|-------------------|-------------------|-------------------|-------------------|-------------------|
| 113                          | 1,771.36          | 1,664.42          | 1,582.99          | 1,663.23          | 6,682.00          |
| 114                          | 835.73            | 858.50            | 790.18            | 803.85            | 3,288.26          |
| 115                          | 2,533.85          | 2,464.77          | 2,388.93          | 2,428.23          | 9,815.78          |
| 116                          | 242.55            | 242.93            | 233.01            | 210.88            | 929.36            |
| 117                          | 11,598.09         | 11,177.35         | 10,494.25         | 10,797.11         | 44,066.80         |
| 118                          | 364.41            | 347.39            | 347.29            | 355.14            | 1,414.23          |
| 119                          | 1,827.82          | 1,737.95          | 1,768.69          | 1,624.91          | 6,959.37          |
| 120                          | 5,786.43          | 5,811.55          | 5,503.32          | 5,394.87          | 22,496.18         |
| 121                          | 3,345.12          | 3,317.04          | 3,147.58          | 3,135.40          | 12,945.14         |
| 122                          | 2,599.45          | 2,447.35          | 2,336.73          | 2,372.78          | 9,756.31          |
| 123                          | 2,471.52          | 2,369.46          | 2,188.23          | 2,143.23          | 9,172.44          |
| 124                          | 2,252.74          | 2,149.26          | 2,063.30          | 2,102.99          | 8,568.29          |
| 125                          | 4,186.67          | 3,943.47          | 3,770.11          | 3,843.70          | 15,743.95         |
| 126                          | 689.98            | 603.05            | 583.43            | 626.94            | 2,503.41          |
| 127                          | 813.50            | 803.27            | 747.26            | 800.07            | 3,164.10          |
| 128                          | 4,114.86          | 3,951.78          | 3,735.58          | 3,647.48          | 15,449.70         |
| 129                          | 2,624.05          | 2,563.75          | 2,529.48          | 2,501.70          | 10,218.98         |
| 130                          | 4,847.57          | 4,807.82          | 4,597.09          | 4,561.89          | 18,814.36         |
| 131                          | 1,726.36          | 1,718.12          | 1,651.24          | 1,681.20          | 6,776.91          |
| 132                          | 3,648.78          | 3,398.08          | 3,212.49          | 3,402.47          | 13,661.83         |
| 133                          | 2,168.00          | 2,060.49          | 1,993.17          | 1,947.31          | 8,168.97          |
| 134                          | 3,187.59          | 3,122.23          | 2,845.92          | 2,809.32          | 11,965.06         |
| 135                          | 1,634.65          | 1,642.84          | 1,546.65          | 1,497.78          | 6,321.92          |
| 136                          | 3,360.40          | 3,261.32          | 3,223.59          | 3,084.12          | 12,929.42         |
| 137                          | 1,532.74          | 1,369.70          | 1,327.09          | 1,205.19          | 5,434.72          |
| 138                          | 3,222.28          | 3,202.80          | 2,939.93          | 2,972.45          | 12,337.46         |
| 139                          | 1,441.79          | 1,333.80          | 1,214.93          | 1,145.60          | 5,136.12          |
| 140                          | 10,585.76         | 10,182.70         | 9,880.79          | 9,706.78          | 40,356.03         |
| 141                          | 4,976.82          | 4,998.18          | 4,864.89          | 4,838.10          | 19,677.99         |
| 142                          | 19,801.08         | 18,651.25         | 18,564.22         | 18,329.45         | 75,345.99         |
| 143                          | 2,504.92          | 2,462.58          | 2,398.35          | 2,383.37          | 9,749.23          |
| 144                          | 3,895.22          | 3,711.52          | 3,581.28          | 3,534.19          | 14,722.21         |
| 145                          | 3,197.43          | 3,003.51          | 2,904.04          | 2,881.91          | 11,986.88         |
| 146                          | 5,499.04          | 5,155.21          | 4,980.82          | 4,903.46          | 20,538.53         |
| 147                          | 4,246.06          | 4,040.74          | 3,992.04          | 3,809.60          | 16,088.44         |
| 148                          | 3,791.27          | 3,721.12          | 3,539.07          | 3,412.84          | 14,464.29         |
| 149                          | 858.41            | 873.20            | 832.50            | 848.77            | 3,412.89          |
| <b>NY - NEW YORK - Total</b> | <b>152,317.93</b> | <b>146,483.73</b> | <b>140,092.49</b> | <b>139,946.35</b> | <b>578,840.51</b> |

**STATE: OH - OHIO**

| REGISTRANT ZIP CODE 3 | 1ST QUARTER | 2ND QUARTER | 3RD QUARTER | 4TH QUARTER | TOTAL GRAMS |
|-----------------------|-------------|-------------|-------------|-------------|-------------|
|-----------------------|-------------|-------------|-------------|-------------|-------------|

|                          |                   |                   |                   |                   |                   |
|--------------------------|-------------------|-------------------|-------------------|-------------------|-------------------|
| 430                      | 8,521.62          | 7,967.09          | 7,869.30          | 7,995.18          | 32,353.19         |
| 431                      | 6,438.25          | 5,980.14          | 5,921.14          | 5,930.41          | 24,269.93         |
| 432                      | 13,052.76         | 11,450.38         | 9,205.14          | 9,336.51          | 43,044.78         |
| 433                      | 2,599.84          | 2,557.57          | 2,494.27          | 2,398.24          | 10,049.91         |
| 434                      | 1,551.39          | 1,564.20          | 1,516.57          | 1,459.00          | 6,091.16          |
| 435                      | 3,367.76          | 3,162.71          | 3,094.73          | 3,145.54          | 12,770.74         |
| 436                      | 6,133.33          | 5,837.38          | 5,755.19          | 5,392.46          | 23,118.36         |
| 437                      | 3,460.53          | 3,312.50          | 3,150.25          | 3,110.11          | 13,033.39         |
| 438                      | 475.77            | 468.40            | 442.89            | 464.07            | 1,851.14          |
| 439                      | 2,972.99          | 2,671.00          | 2,546.07          | 2,523.25          | 10,713.32         |
| 440                      | 7,336.08          | 6,898.10          | 6,589.36          | 6,688.06          | 27,511.59         |
| 441                      | 8,677.05          | 8,552.36          | 8,150.93          | 8,103.66          | 33,484.01         |
| 442                      | 5,589.39          | 5,413.68          | 5,226.49          | 5,104.56          | 21,334.12         |
| 443                      | 2,641.07          | 2,518.11          | 2,435.86          | 2,364.16          | 9,959.19          |
| 444                      | 6,898.24          | 6,409.43          | 6,068.34          | 6,007.14          | 25,383.15         |
| 445                      | 4,249.96          | 3,947.43          | 3,835.84          | 3,754.43          | 15,787.66         |
| 446                      | 5,169.90          | 4,866.04          | 4,544.00          | 4,536.95          | 19,116.88         |
| 447                      | 3,002.24          | 2,797.78          | 2,698.59          | 2,783.27          | 11,281.88         |
| 448                      | 3,122.43          | 2,924.05          | 3,008.51          | 2,808.29          | 11,863.28         |
| 449                      | 802.07            | 784.75            | 741.92            | 800.57            | 3,129.30          |
| 450                      | 12,490.98         | 11,994.29         | 11,625.93         | 11,898.35         | 48,009.55         |
| 451                      | 4,511.15          | 4,440.98          | 4,291.91          | 4,275.45          | 17,519.49         |
| 452                      | 10,312.24         | 9,810.97          | 9,199.04          | 9,318.15          | 38,640.40         |
| 453                      | 7,906.38          | 7,957.29          | 7,728.33          | 7,956.01          | 31,548.02         |
| 454                      | 9,304.30          | 8,943.85          | 8,670.25          | 8,685.77          | 35,604.17         |
| 455                      | 2,192.71          | 2,131.70          | 2,212.50          | 2,087.47          | 8,624.38          |
| 456                      | 7,705.45          | 7,249.13          | 6,871.33          | 6,937.89          | 28,763.79         |
| 457                      | 2,793.43          | 2,600.77          | 2,491.61          | 2,470.92          | 10,356.72         |
| 458                      | 4,132.23          | 4,016.15          | 3,874.88          | 3,860.89          | 15,884.15         |
| <b>OH - OHIO - Total</b> | <b>157,411.53</b> | <b>149,228.23</b> | <b>142,261.15</b> | <b>142,196.74</b> | <b>591,097.65</b> |

**STATE: OK - OKLAHOMA**

| REGISTRANT ZIP CODE 3 | 1ST QUARTER | 2ND QUARTER | 3RD QUARTER | 4TH QUARTER | TOTAL GRAMS |
|-----------------------|-------------|-------------|-------------|-------------|-------------|
| 730                   | 23,445.51   | 22,762.55   | 22,124.00   | 21,289.88   | 89,621.94   |
| 731                   | 32,292.89   | 31,885.36   | 30,049.57   | 27,499.47   | 121,727.29  |
| 734                   | 5,187.43    | 5,064.69    | 4,901.82    | 4,498.18    | 19,652.13   |
| 735                   | 9,226.14    | 8,889.92    | 8,847.47    | 8,116.75    | 35,080.28   |
| 736                   | 1,587.06    | 1,617.46    | 1,513.57    | 1,449.00    | 6,167.10    |
| 737                   | 3,820.83    | 3,835.49    | 3,622.70    | 3,519.93    | 14,798.95   |
| 738                   | 665.90      | 638.80      | 640.17      | 612.53      | 2,557.40    |
| 739                   | 287.86      | 304.49      | 285.44      | 285.08      | 1,162.87    |

|                              |                   |                   |                   |                   |                   |
|------------------------------|-------------------|-------------------|-------------------|-------------------|-------------------|
| 740                          | 25,933.28         | 25,865.42         | 23,953.69         | 22,312.04         | 98,064.43         |
| 741                          | 17,842.84         | 17,598.74         | 16,588.55         | 15,799.51         | 67,829.65         |
| 743                          | 4,393.90          | 4,225.03          | 3,925.61          | 3,538.43          | 16,082.96         |
| 744                          | 13,787.47         | 13,510.12         | 12,805.69         | 11,902.01         | 52,005.30         |
| 745                          | 4,147.56          | 4,137.76          | 3,808.61          | 3,558.92          | 15,652.85         |
| 746                          | 1,939.69          | 1,761.11          | 1,679.85          | 1,574.96          | 6,955.62          |
| 747                          | 5,618.72          | 5,443.00          | 5,428.04          | 5,008.28          | 21,498.04         |
| 748                          | 7,940.55          | 7,916.26          | 7,537.86          | 7,080.71          | 30,475.37         |
| 749                          | 4,608.93          | 4,611.99          | 4,531.86          | 4,143.76          | 17,896.54         |
| <b>OK - OKLAHOMA - Total</b> | <b>162,726.57</b> | <b>160,068.20</b> | <b>152,244.49</b> | <b>142,189.44</b> | <b>617,228.70</b> |

**STATE: OR - OREGON**

| REGISTRANT ZIP CODE 3      | 1ST QUARTER      | 2ND QUARTER      | 3RD QUARTER      | 4TH QUARTER      | TOTAL GRAMS       |
|----------------------------|------------------|------------------|------------------|------------------|-------------------|
| 970                        | 12,782.62        | 12,427.19        | 11,963.61        | 11,888.09        | 49,061.51         |
| 971                        | 5,718.64         | 5,633.52         | 5,316.67         | 5,174.15         | 21,842.97         |
| 972                        | 15,757.63        | 15,122.29        | 14,569.74        | 14,420.65        | 59,870.31         |
| 973                        | 10,503.27        | 10,087.23        | 9,798.12         | 9,497.57         | 39,886.18         |
| 974                        | 16,715.78        | 16,087.59        | 15,721.85        | 15,035.46        | 63,560.69         |
| 975                        | 10,442.64        | 10,547.94        | 10,367.99        | 10,120.87        | 41,479.43         |
| 976                        | 2,388.94         | 2,422.23         | 2,261.49         | 2,067.78         | 9,140.43          |
| 977                        | 4,791.73         | 4,689.87         | 4,598.53         | 4,482.81         | 18,562.94         |
| 978                        | 3,829.04         | 3,700.51         | 3,506.81         | 3,409.80         | 14,446.16         |
| 979                        | 1,671.53         | 1,613.24         | 1,486.74         | 1,567.83         | 6,339.34          |
| <b>OR - OREGON - Total</b> | <b>84,601.82</b> | <b>82,331.60</b> | <b>79,591.55</b> | <b>77,665.00</b> | <b>324,189.97</b> |

**STATE: PA - PENNSYLVANIA**

| REGISTRANT ZIP CODE 3 | 1ST QUARTER | 2ND QUARTER | 3RD QUARTER | 4TH QUARTER | TOTAL GRAMS |
|-----------------------|-------------|-------------|-------------|-------------|-------------|
| 150                   | 7,525.69    | 7,106.04    | 6,545.62    | 6,692.14    | 27,869.49   |
| 151                   | 5,915.52    | 5,178.59    | 4,902.33    | 4,784.10    | 20,780.55   |
| 152                   | 10,313.12   | 9,743.96    | 9,095.79    | 9,252.61    | 38,405.49   |
| 153                   | 3,510.97    | 2,788.15    | 3,349.86    | 2,740.15    | 12,389.13   |
| 154                   | 4,345.79    | 4,122.16    | 3,947.38    | 3,907.62    | 16,322.94   |
| 155                   | 1,164.46    | 1,101.98    | 1,096.81    | 1,078.66    | 4,441.92    |
| 156                   | 4,766.62    | 4,400.75    | 4,370.22    | 4,232.09    | 17,769.69   |
| 157                   | 2,145.33    | 2,049.75    | 1,948.74    | 1,967.13    | 8,110.96    |
| 158                   | 1,876.58    | 1,763.66    | 1,770.84    | 1,747.91    | 7,158.98    |
| 159                   | 2,182.64    | 2,040.50    | 1,916.96    | 1,935.11    | 8,075.21    |
| 160                   | 2,615.31    | 2,479.38    | 2,408.27    | 2,332.10    | 9,835.06    |
| 161                   | 3,591.24    | 3,325.08    | 3,250.43    | 3,135.92    | 13,302.67   |
| 162                   | 1,511.84    | 1,431.26    | 1,400.80    | 1,257.55    | 5,601.44    |
| 163                   | 2,996.50    | 2,874.36    | 2,723.75    | 2,646.86    | 11,241.46   |
| 164                   | 1,996.48    | 1,866.73    | 1,829.37    | 1,802.70    | 7,495.27    |

|                                  |                   |                   |                   |                   |                   |
|----------------------------------|-------------------|-------------------|-------------------|-------------------|-------------------|
| 165                              | 6,790.17          | 6,328.37          | 6,226.99          | 5,969.32          | 25,314.85         |
| 166                              | 4,655.15          | 4,348.25          | 4,217.58          | 3,960.01          | 17,180.99         |
| 167                              | 1,272.60          | 1,176.21          | 1,123.64          | 1,088.54          | 4,661.00          |
| 168                              | 1,309.93          | 1,216.62          | 1,169.60          | 1,091.27          | 4,787.43          |
| 169                              | 781.25            | 718.56            | 712.79            | 706.80            | 2,919.41          |
| 170                              | 7,097.38          | 6,553.97          | 6,422.50          | 6,362.28          | 26,436.13         |
| 171                              | 1,656.25          | 1,560.54          | 1,438.28          | 1,389.89          | 6,044.96          |
| 172                              | 1,326.34          | 1,225.57          | 1,145.69          | 1,141.89          | 4,839.50          |
| 173                              | 2,247.36          | 2,170.93          | 2,090.82          | 2,019.10          | 8,528.20          |
| 174                              | 1,214.53          | 1,139.26          | 1,107.00          | 1,102.42          | 4,563.21          |
| 175                              | 2,440.92          | 2,318.77          | 2,181.37          | 2,166.82          | 9,107.89          |
| 176                              | 1,792.36          | 1,707.16          | 1,657.72          | 1,573.14          | 6,730.38          |
| 177                              | 2,656.92          | 2,478.68          | 2,363.48          | 2,354.35          | 9,853.44          |
| 178                              | 1,534.38          | 1,415.97          | 1,356.74          | 1,350.30          | 5,657.39          |
| 179                              | 1,515.72          | 1,381.27          | 1,129.60          | 1,088.58          | 5,115.18          |
| 180                              | 2,755.13          | 2,737.54          | 2,586.53          | 2,627.38          | 10,706.58         |
| 181                              | 1,141.16          | 1,064.75          | 1,010.19          | 1,027.49          | 4,243.59          |
| 182                              | 1,582.13          | 1,567.62          | 1,453.04          | 1,396.13          | 5,998.92          |
| 183                              | 1,391.95          | 1,413.61          | 1,273.49          | 1,289.16          | 5,368.21          |
| 184                              | 2,613.06          | 2,467.27          | 2,462.19          | 2,362.32          | 9,904.85          |
| 185                              | 3,285.88          | 3,110.07          | 2,910.05          | 2,834.55          | 12,140.56         |
| 186                              | 2,541.80          | 2,339.54          | 2,321.10          | 2,148.38          | 9,350.82          |
| 187                              | 6,806.91          | 7,321.56          | 6,217.50          | 6,707.52          | 27,053.49         |
| 188                              | 910.97            | 879.02            | 829.57            | 834.85            | 3,454.42          |
| 189                              | 2,219.20          | 2,256.35          | 2,103.61          | 2,147.21          | 8,726.36          |
| 190                              | 8,691.38          | 9,038.26          | 10,617.32         | 6,649.07          | 34,996.03         |
| 191                              | 5,601.89          | 5,512.83          | 5,115.44          | 4,958.57          | 21,188.73         |
| 193                              | 2,264.65          | 2,188.06          | 2,058.32          | 2,051.57          | 8,562.61          |
| 194                              | 3,516.37          | 3,354.09          | 3,109.01          | 3,029.58          | 13,009.05         |
| 195                              | 1,516.00          | 1,459.31          | 1,324.86          | 1,318.79          | 5,618.96          |
| 196                              | 1,771.30          | 1,700.35          | 1,643.12          | 1,593.25          | 6,708.03          |
| <b>PA - PENNSYLVANIA - Total</b> | <b>143,359.13</b> | <b>136,422.73</b> | <b>131,936.33</b> | <b>125,853.23</b> | <b>537,571.41</b> |

**STATE: PR - PUERTO RICO**

| REGISTRANT ZIP CODE 3           | 1ST QUARTER   | 2ND QUARTER   | 3RD QUARTER   | 4TH QUARTER   | TOTAL GRAMS     |
|---------------------------------|---------------|---------------|---------------|---------------|-----------------|
| 006                             | 134.16        | 125.34        | 265.80        | 206.89        | 732.18          |
| 007                             | 128.55        | 108.40        | 153.97        | 138.50        | 529.42          |
| 009                             | 110.77        | 111.07        | 187.30        | 169.91        | 579.04          |
| <b>PR - PUERTO RICO - Total</b> | <b>373.47</b> | <b>344.81</b> | <b>607.07</b> | <b>515.30</b> | <b>1,840.64</b> |

**STATE: RI - RHODE ISLAND**

| REGISTRANT ZIP CODE 3 | 1ST QUARTER | 2ND QUARTER | 3RD QUARTER | 4TH QUARTER | TOTAL GRAMS |
|-----------------------|-------------|-------------|-------------|-------------|-------------|
|-----------------------|-------------|-------------|-------------|-------------|-------------|



|                                  |                 |                 |                 |                 |                  |
|----------------------------------|-----------------|-----------------|-----------------|-----------------|------------------|
| 028                              | 5,459.77        | 5,147.28        | 5,019.09        | 4,971.96        | 20,598.11        |
| 029                              | 3,683.38        | 3,529.49        | 3,338.58        | 3,199.83        | 13,751.29        |
| <b>RI - RHODE ISLAND - Total</b> | <b>9,143.16</b> | <b>8,676.78</b> | <b>8,357.67</b> | <b>8,171.79</b> | <b>34,349.40</b> |

**STATE: SC - SOUTH CAROLINA**

| REGISTRANT ZIP CODE 3              | 1ST QUARTER       | 2ND QUARTER       | 3RD QUARTER       | 4TH QUARTER       | TOTAL GRAMS       |
|------------------------------------|-------------------|-------------------|-------------------|-------------------|-------------------|
| 290                                | 6,777.78          | 6,162.40          | 6,129.81          | 6,214.94          | 25,284.94         |
| 291                                | 7,582.15          | 7,198.39          | 6,769.32          | 6,842.14          | 28,392.00         |
| 292                                | 5,273.66          | 4,631.20          | 4,800.19          | 4,538.01          | 19,243.07         |
| 293                                | 19,271.76         | 18,470.54         | 17,000.62         | 16,731.84         | 71,474.76         |
| 294                                | 17,616.11         | 16,484.41         | 15,596.83         | 15,639.81         | 65,337.16         |
| 295                                | 20,795.70         | 19,476.66         | 18,870.30         | 18,948.19         | 78,090.84         |
| 296                                | 33,601.44         | 31,784.32         | 29,719.73         | 29,912.58         | 125,018.06        |
| 297                                | 5,973.42          | 5,241.39          | 4,923.58          | 5,133.72          | 21,272.12         |
| 298                                | 3,087.67          | 2,955.35          | 2,947.00          | 2,739.13          | 11,729.16         |
| 299                                | 2,908.48          | 2,572.75          | 2,572.24          | 2,471.67          | 10,525.14         |
| <b>SC - SOUTH CAROLINA - Total</b> | <b>122,888.18</b> | <b>114,977.41</b> | <b>109,329.62</b> | <b>109,172.04</b> | <b>456,367.25</b> |

**STATE: SD - SOUTH DAKOTA**

| REGISTRANT ZIP CODE 3            | 1ST QUARTER      | 2ND QUARTER      | 3RD QUARTER      | 4TH QUARTER      | TOTAL GRAMS      |
|----------------------------------|------------------|------------------|------------------|------------------|------------------|
| 570                              | 2,110.78         | 2,089.31         | 2,045.30         | 2,060.07         | 8,305.46         |
| 571                              | 3,977.07         | 3,822.49         | 3,678.11         | 3,689.35         | 15,167.02        |
| 572                              | 874.39           | 791.59           | 794.91           | 787.99           | 3,248.89         |
| 573                              | 1,057.38         | 1,032.30         | 937.67           | 1,002.15         | 4,029.49         |
| 574                              | 732.90           | 705.65           | 710.85           | 653.20           | 2,802.61         |
| 575                              | 910.45           | 906.65           | 854.11           | 842.35           | 3,513.55         |
| 576                              | 213.90           | 209.18           | 201.45           | 198.92           | 823.45           |
| 577                              | 2,658.71         | 2,489.52         | 2,447.85         | 2,345.37         | 9,941.46         |
| <b>SD - SOUTH DAKOTA - Total</b> | <b>12,535.57</b> | <b>12,046.69</b> | <b>11,670.25</b> | <b>11,579.41</b> | <b>47,831.94</b> |

**STATE: TN - TENNESSEE**

| REGISTRANT ZIP CODE 3 | 1ST QUARTER | 2ND QUARTER | 3RD QUARTER | 4TH QUARTER | TOTAL GRAMS |
|-----------------------|-------------|-------------|-------------|-------------|-------------|
| 370                   | 26,913.83   | 25,157.56   | 23,490.50   | 23,047.85   | 98,609.75   |
| 371                   | 26,892.38   | 25,516.36   | 24,347.69   | 23,994.69   | 100,751.12  |
| 372                   | 12,229.17   | 11,249.77   | 10,213.31   | 10,313.64   | 44,005.89   |
| 373                   | 24,246.57   | 23,444.57   | 22,309.50   | 22,226.75   | 92,227.39   |
| 374                   | 8,678.83    | 8,223.06    | 7,738.71    | 7,555.00    | 32,195.61   |
| 376                   | 15,459.25   | 14,759.50   | 13,873.67   | 13,650.02   | 57,742.44   |
| 377                   | 12,372.88   | 11,995.12   | 10,992.32   | 11,108.41   | 46,468.73   |
| 378                   | 19,663.64   | 19,267.14   | 17,998.07   | 17,641.09   | 74,569.95   |
| 379                   | 9,505.25    | 9,266.18    | 8,695.59    | 8,782.60    | 36,249.62   |
| 380                   | 12,482.88   | 11,944.97   | 10,679.92   | 10,710.75   | 45,818.53   |
| 381                   | 15,360.33   | 14,323.75   | 15,982.25   | 11,389.26   | 57,055.60   |

|                               |                   |                   |                   |                   |                   |
|-------------------------------|-------------------|-------------------|-------------------|-------------------|-------------------|
| 382                           | 7,205.37          | 6,947.14          | 6,260.98          | 5,984.11          | <b>26,397.61</b>  |
| 383                           | 15,047.30         | 14,565.81         | 13,375.68         | 12,882.42         | <b>55,871.20</b>  |
| 384                           | 8,015.69          | 7,873.11          | 7,377.27          | 7,477.97          | <b>30,744.04</b>  |
| 385                           | 7,356.78          | 7,177.90          | 6,530.13          | 6,569.45          | <b>27,634.26</b>  |
| <b>TN - TENNESSEE - Total</b> | <b>221,430.15</b> | <b>211,711.96</b> | <b>199,865.59</b> | <b>193,334.02</b> | <b>826,341.72</b> |

**STATE: TX - TEXAS**

| REGISTRANT ZIP CODE 3 | 1ST QUARTER | 2ND QUARTER | 3RD QUARTER | 4TH QUARTER | TOTAL GRAMS       |
|-----------------------|-------------|-------------|-------------|-------------|-------------------|
| 750                   | 47,474.07   | 45,645.12   | 44,320.21   | 44,843.08   | <b>182,282.47</b> |
| 751                   | 20,945.04   | 20,408.93   | 20,169.83   | 20,316.63   | <b>81,840.44</b>  |
| 752                   | 25,663.90   | 24,280.04   | 23,052.71   | 23,150.83   | <b>96,147.48</b>  |
| 753                   | 283.55      | 285.45      | 273.14      | 297.48      | <b>1,139.62</b>   |
| 754                   | 13,479.64   | 12,906.84   | 12,618.63   | 12,471.01   | <b>51,476.11</b>  |
| 755                   | 4,624.92    | 4,493.68    | 4,489.09    | 4,375.46    | <b>17,983.15</b>  |
| 756                   | 9,879.46    | 9,757.97    | 9,594.65    | 9,831.52    | <b>39,063.61</b>  |
| 757                   | 14,064.01   | 13,914.98   | 13,316.80   | 13,613.61   | <b>54,909.40</b>  |
| 758                   | 2,723.86    | 2,584.34    | 2,511.23    | 2,583.95    | <b>10,403.39</b>  |
| 759                   | 8,180.67    | 7,883.72    | 7,595.62    | 7,382.29    | <b>31,042.29</b>  |
| 760                   | 36,520.33   | 36,187.92   | 35,036.01   | 35,872.96   | <b>143,617.21</b> |
| 761                   | 31,233.43   | 30,834.12   | 29,440.48   | 29,162.09   | <b>120,670.11</b> |
| 762                   | 13,545.35   | 13,214.95   | 12,818.36   | 12,676.07   | <b>52,254.73</b>  |
| 763                   | 6,460.12    | 6,434.50    | 6,450.53    | 6,021.04    | <b>25,366.19</b>  |
| 764                   | 4,218.50    | 4,393.95    | 4,003.39    | 4,346.19    | <b>16,962.04</b>  |
| 765                   | 12,129.68   | 11,629.44   | 11,381.25   | 10,372.55   | <b>45,512.93</b>  |
| 766                   | 3,605.06    | 3,558.56    | 3,448.49    | 3,274.20    | <b>13,886.31</b>  |
| 767                   | 9,520.72    | 9,314.38    | 8,890.78    | 8,727.27    | <b>36,453.16</b>  |
| 768                   | 2,911.81    | 2,955.63    | 2,884.48    | 2,703.42    | <b>11,455.34</b>  |
| 769                   | 3,796.48    | 3,580.13    | 3,588.96    | 3,478.20    | <b>14,443.76</b>  |
| 770                   | 50,661.89   | 48,932.98   | 47,508.62   | 46,887.85   | <b>193,991.34</b> |
| 772                   | 0.61        | 1.21        | 0           | 0.30        | <b>2.12</b>       |
| 773                   | 28,508.76   | 27,792.90   | 26,977.72   | 28,060.74   | <b>111,340.13</b> |
| 774                   | 17,891.38   | 17,270.52   | 17,543.69   | 17,627.34   | <b>70,332.93</b>  |
| 775                   | 32,078.38   | 30,874.85   | 30,189.86   | 29,538.76   | <b>122,681.85</b> |
| 776                   | 8,463.36    | 8,216.31    | 8,183.12    | 8,046.56    | <b>32,909.34</b>  |
| 777                   | 3,923.14    | 3,899.13    | 3,934.37    | 4,073.59    | <b>15,830.22</b>  |
| 778                   | 5,677.76    | 5,449.34    | 5,107.29    | 4,954.31    | <b>21,188.69</b>  |
| 779                   | 6,798.16    | 6,779.02    | 6,564.37    | 6,232.47    | <b>26,374.02</b>  |
| 780                   | 8,648.07    | 8,032.91    | 8,072.33    | 7,964.26    | <b>32,717.57</b>  |
| 781                   | 9,988.24    | 10,047.17   | 9,518.67    | 9,474.72    | <b>39,028.80</b>  |
| 782                   | 41,719.29   | 41,486.39   | 40,333.81   | 39,662.95   | <b>163,202.43</b> |
| 783                   | 5,981.82    | 5,756.90    | 5,650.58    | 5,560.28    | <b>22,949.57</b>  |

|                           |                   |                   |                   |                   |                     |
|---------------------------|-------------------|-------------------|-------------------|-------------------|---------------------|
| 784                       | 11,496.79         | 10,462.41         | 10,091.13         | 9,746.39          | 41,796.73           |
| 785                       | 7,831.05          | 7,166.64          | 7,251.39          | 7,040.80          | 29,289.88           |
| 786                       | 20,191.86         | 19,965.83         | 19,130.51         | 19,181.67         | 78,469.87           |
| 787                       | 17,992.00         | 17,319.84         | 16,259.33         | 15,909.51         | 67,480.68           |
| 788                       | 2,672.75          | 1,949.55          | 1,898.48          | 1,749.29          | 8,270.07            |
| 789                       | 1,468.00          | 1,486.49          | 1,482.67          | 1,360.24          | 5,797.40            |
| 790                       | 3,857.66          | 3,797.42          | 3,556.31          | 3,623.20          | 14,834.60           |
| 791                       | 7,567.43          | 8,066.35          | 7,408.62          | 7,512.89          | 30,555.29           |
| 792                       | 920.38            | 849.60            | 767.39            | 844.00            | 3,381.37            |
| 793                       | 3,232.07          | 3,155.48          | 3,013.73          | 2,976.61          | 12,377.89           |
| 794                       | 10,573.90         | 10,421.24         | 9,976.04          | 9,855.94          | 40,827.11           |
| 795                       | 2,544.96          | 2,572.88          | 2,412.71          | 2,479.36          | 10,009.90           |
| 796                       | 5,461.12          | 5,177.26          | 4,868.14          | 4,895.19          | 20,401.72           |
| 797                       | 10,780.34         | 10,094.48         | 9,762.14          | 9,455.27          | 40,092.23           |
| 798                       | 313.54            | 321.72            | 327.88            | 314.02            | 1,277.16            |
| 799                       | 7,196.23          | 6,947.66          | 6,793.79          | 6,088.15          | 27,025.83           |
| <b>TX - TEXAS - Total</b> | <b>605,701.53</b> | <b>588,559.11</b> | <b>570,469.31</b> | <b>566,616.51</b> | <b>2,331,346.46</b> |

**STATE: UT - UTAH**

| REGISTRANT ZIP CODE 3    | 1ST QUARTER      | 2ND QUARTER      | 3RD QUARTER      | 4TH QUARTER      | TOTAL GRAMS       |
|--------------------------|------------------|------------------|------------------|------------------|-------------------|
| 840                      | 20,285.17        | 19,090.90        | 18,620.71        | 19,029.40        | 77,026.19         |
| 841                      | 13,182.89        | 12,595.49        | 12,085.28        | 11,992.30        | 49,855.96         |
| 843                      | 2,512.80         | 2,328.69         | 2,454.15         | 2,329.81         | 9,625.45          |
| 844                      | 4,031.05         | 3,787.98         | 3,617.62         | 3,695.16         | 15,131.81         |
| 845                      | 1,553.35         | 1,695.93         | 1,471.87         | 1,675.43         | 6,396.57          |
| 846                      | 4,857.38         | 4,660.10         | 4,518.08         | 4,623.53         | 18,659.08         |
| 847                      | 6,703.14         | 6,574.30         | 6,342.35         | 6,433.97         | 26,053.76         |
| <b>UT - UTAH - Total</b> | <b>53,125.77</b> | <b>50,733.38</b> | <b>49,110.06</b> | <b>49,779.60</b> | <b>202,748.82</b> |

**STATE: VA - VIRGINIA**

| REGISTRANT ZIP CODE 3 | 1ST QUARTER | 2ND QUARTER | 3RD QUARTER | 4TH QUARTER | TOTAL GRAMS |
|-----------------------|-------------|-------------|-------------|-------------|-------------|
| 201                   | 3,730.57    | 3,455.17    | 3,316.27    | 3,475.42    | 13,977.44   |
| 220                   | 1,688.46    | 1,486.82    | 1,504.02    | 1,396.21    | 6,075.52    |
| 221                   | 1,398.28    | 1,411.53    | 1,343.32    | 1,395.21    | 5,548.34    |
| 222                   | 463.85      | 416.00      | 408.70      | 398.78      | 1,687.33    |
| 223                   | 839.42      | 690.84      | 636.48      | 727.69      | 2,894.44    |
| 224                   | 2,328.94    | 2,106.55    | 2,014.65    | 2,061.03    | 8,511.17    |
| 225                   | 1,061.72    | 956.72      | 937.31      | 923.88      | 3,879.63    |
| 226                   | 2,265.42    | 2,108.56    | 1,978.56    | 2,069.31    | 8,421.85    |
| 227                   | 467.80      | 459.75      | 405.63      | 373.58      | 1,706.77    |
| 228                   | 1,888.29    | 1,757.53    | 1,727.00    | 1,726.03    | 7,098.84    |
| 229                   | 2,143.42    | 2,002.40    | 1,927.76    | 1,832.62    | 7,906.20    |

|                              |                  |                  |                  |                  |                   |
|------------------------------|------------------|------------------|------------------|------------------|-------------------|
| 230                          | 1,905.49         | 1,786.70         | 1,803.27         | 1,770.88         | 7,266.33          |
| 231                          | 3,379.27         | 3,181.55         | 3,046.16         | 3,119.29         | 12,726.27         |
| 232                          | 5,351.87         | 4,771.88         | 4,507.14         | 4,521.91         | 19,152.80         |
| 233                          | 2,454.74         | 2,271.30         | 2,149.58         | 2,191.34         | 9,066.96          |
| 234                          | 5,460.76         | 5,190.03         | 4,776.20         | 4,695.96         | 20,122.95         |
| 235                          | 1,941.22         | 1,709.15         | 1,618.78         | 1,627.95         | 6,897.11          |
| 236                          | 3,320.39         | 3,045.55         | 2,896.43         | 2,828.91         | 12,091.27         |
| 237                          | 1,829.56         | 1,665.72         | 1,564.91         | 1,398.39         | 6,458.57          |
| 238                          | 2,697.39         | 2,525.69         | 2,472.81         | 2,438.72         | 10,134.62         |
| 239                          | 1,089.29         | 975.07           | 930.57           | 1,012.58         | 4,007.51          |
| 240                          | 7,805.80         | 7,711.76         | 7,377.46         | 7,453.40         | 30,348.41         |
| 241                          | 7,671.42         | 7,213.68         | 6,856.02         | 6,956.96         | 28,698.09         |
| 242                          | 11,544.02        | 10,776.48        | 10,504.30        | 10,730.98        | 43,555.78         |
| 243                          | 4,104.39         | 4,023.78         | 3,826.13         | 4,185.52         | 16,139.83         |
| 244                          | 2,412.71         | 2,216.16         | 2,190.20         | 2,157.42         | 8,976.49          |
| 245                          | 6,170.80         | 5,870.09         | 5,572.90         | 5,701.35         | 23,315.14         |
| 246                          | 3,629.01         | 3,487.26         | 3,352.96         | 3,401.51         | 13,870.75         |
| <b>VA - VIRGINIA - Total</b> | <b>91,044.29</b> | <b>85,273.72</b> | <b>81,645.52</b> | <b>82,572.85</b> | <b>340,536.39</b> |

**STATE: VI - VIRGIN ISLANDS**

| REGISTRANT ZIP CODE 3              | 1ST QUARTER   | 2ND QUARTER   | 3RD QUARTER   | 4TH QUARTER   | TOTAL GRAMS   |
|------------------------------------|---------------|---------------|---------------|---------------|---------------|
| 008                                | 285.51        | 221.22        | 224.79        | 237.30        | 968.81        |
| <b>VI - VIRGIN ISLANDS - Total</b> | <b>285.51</b> | <b>221.22</b> | <b>224.79</b> | <b>237.30</b> | <b>968.81</b> |

**STATE: VT - VERMONT**

| REGISTRANT ZIP CODE 3       | 1ST QUARTER     | 2ND QUARTER     | 3RD QUARTER     | 4TH QUARTER     | TOTAL GRAMS      |
|-----------------------------|-----------------|-----------------|-----------------|-----------------|------------------|
| 050                         | 283.11          | 315.78          | 319.82          | 264.75          | 1,183.46         |
| 051                         | 177.85          | 165.85          | 149.96          | 151.13          | 644.80           |
| 052                         | 232.05          | 219.02          | 219.79          | 198.75          | 869.60           |
| 053                         | 285.70          | 236.86          | 240.37          | 244.14          | 1,007.06         |
| 054                         | 1,715.77        | 1,675.89        | 1,621.54        | 1,590.78        | 6,603.99         |
| 056                         | 691.69          | 682.20          | 669.72          | 674.18          | 2,717.78         |
| 057                         | 360.80          | 320.63          | 324.83          | 322.29          | 1,328.56         |
| 058                         | 517.14          | 520.24          | 483.40          | 537.50          | 2,058.29         |
| <b>VT - VERMONT - Total</b> | <b>4,264.10</b> | <b>4,136.47</b> | <b>4,029.43</b> | <b>3,983.52</b> | <b>16,413.53</b> |

**STATE: WA - WASHINGTON**

| REGISTRANT ZIP CODE 3 | 1ST QUARTER | 2ND QUARTER | 3RD QUARTER | 4TH QUARTER | TOTAL GRAMS |
|-----------------------|-------------|-------------|-------------|-------------|-------------|
| 980                   | 15,204.69   | 14,549.79   | 14,093.99   | 13,905.68   | 57,754.15   |
| 981                   | 7,147.93    | 7,032.39    | 6,489.34    | 6,720.64    | 27,390.31   |
| 982                   | 13,380.68   | 12,903.69   | 12,614.07   | 12,075.76   | 50,974.19   |
| 983                   | 11,158.25   | 11,187.14   | 10,706.61   | 10,818.46   | 43,870.45   |
| 984                   | 6,110.41    | 5,957.77    | 5,593.37    | 5,426.97    | 23,088.51   |

|                                |                   |                   |                   |                   |                   |
|--------------------------------|-------------------|-------------------|-------------------|-------------------|-------------------|
| 985                            | 7,724.74          | 7,460.42          | 7,235.71          | 7,093.23          | 29,514.09         |
| 986                            | 11,390.58         | 10,991.73         | 10,909.25         | 10,702.26         | 43,993.82         |
| 988                            | 4,158.66          | 3,976.61          | 3,864.75          | 3,764.54          | 15,764.57         |
| 989                            | 4,947.05          | 4,858.94          | 4,696.26          | 4,536.22          | 19,038.48         |
| 990                            | 3,252.96          | 3,155.09          | 3,154.60          | 3,206.92          | 12,769.56         |
| 991                            | 4,060.28          | 3,913.36          | 3,747.90          | 3,730.78          | 15,452.30         |
| 992                            | 17,136.28         | 16,995.27         | 16,035.39         | 15,958.16         | 66,125.09         |
| 993                            | 9,449.14          | 9,179.76          | 8,662.18          | 8,514.10          | 35,805.18         |
| 994                            | 1,965.33          | 1,894.59          | 1,740.08          | 1,826.91          | 7,426.91          |
| <b>WA - WASHINGTON - Total</b> | <b>117,086.98</b> | <b>114,056.54</b> | <b>109,543.49</b> | <b>108,280.60</b> | <b>448,967.62</b> |

**STATE: WI - WISCONSIN**

| REGISTRANT ZIP CODE 3         | 1ST QUARTER      | 2ND QUARTER      | 3RD QUARTER      | 4TH QUARTER      | TOTAL GRAMS       |
|-------------------------------|------------------|------------------|------------------|------------------|-------------------|
| 530                           | 6,561.20         | 6,557.67         | 6,456.35         | 6,522.91         | 26,098.12         |
| 531                           | 8,915.70         | 8,897.25         | 8,792.40         | 8,676.58         | 35,281.93         |
| 532                           | 9,506.47         | 9,601.47         | 9,176.29         | 8,945.41         | 37,229.63         |
| 534                           | 2,133.15         | 2,162.36         | 2,129.45         | 2,015.87         | 8,440.82          |
| 535                           | 6,714.62         | 6,660.14         | 6,557.25         | 6,530.42         | 26,462.42         |
| 537                           | 3,154.55         | 3,175.60         | 3,002.42         | 2,931.32         | 12,263.89         |
| 538                           | 708.16           | 663.49           | 637.41           | 666.81           | 2,675.87          |
| 539                           | 3,296.03         | 3,228.16         | 3,194.52         | 3,114.80         | 12,833.51         |
| 540                           | 779.81           | 730.25           | 726.05           | 768.91           | 3,005.02          |
| 541                           | 2,224.03         | 2,285.52         | 2,189.99         | 2,080.55         | 8,780.09          |
| 542                           | 1,267.89         | 1,250.13         | 1,259.16         | 1,226.16         | 5,003.34          |
| 543                           | 2,363.29         | 2,315.71         | 2,273.22         | 2,256.71         | 9,208.94          |
| 544                           | 4,483.82         | 4,296.94         | 4,237.80         | 4,139.44         | 17,158.00         |
| 545                           | 1,244.89         | 1,277.35         | 1,283.96         | 1,169.34         | 4,975.55          |
| 546                           | 3,956.72         | 3,812.71         | 3,649.49         | 3,661.51         | 15,080.44         |
| 547                           | 2,624.89         | 2,415.35         | 2,351.13         | 2,404.02         | 9,795.39          |
| 548                           | 2,781.29         | 2,761.90         | 2,663.24         | 2,680.25         | 10,886.68         |
| 549                           | 6,113.31         | 5,944.56         | 6,012.10         | 5,958.45         | 24,028.42         |
| <b>WI - WISCONSIN - Total</b> | <b>68,829.82</b> | <b>68,036.57</b> | <b>66,592.22</b> | <b>65,749.46</b> | <b>269,208.06</b> |

**STATE: WV - WEST VIRGINIA**

| REGISTRANT ZIP CODE 3 | 1ST QUARTER | 2ND QUARTER | 3RD QUARTER | 4TH QUARTER | TOTAL GRAMS |
|-----------------------|-------------|-------------|-------------|-------------|-------------|
| 247                   | 1,862.66    | 1,695.26    | 1,514.43    | 1,223.58    | 6,295.93    |
| 248                   | 989.31      | 659.98      | 640.12      | 670.01      | 2,959.42    |
| 249                   | 1,009.37    | 1,019.56    | 971.64      | 894.87      | 3,895.45    |
| 250                   | 2,275.13    | 2,123.34    | 2,037.10    | 1,872.45    | 8,308.02    |
| 251                   | 1,733.02    | 1,703.46    | 1,599.10    | 1,601.13    | 6,636.70    |
| 252                   | 1,250.90    | 989.19      | 901.06      | 816.29      | 3,957.44    |
| 253                   | 4,912.75    | 4,423.27    | 4,075.46    | 3,564.40    | 16,975.88   |

|                                   |                  |                  |                  |                  |                   |
|-----------------------------------|------------------|------------------|------------------|------------------|-------------------|
| 254                               | 2,074.84         | 2,018.66         | 1,970.16         | 1,879.19         | 7,942.84          |
| 255                               | 4,694.52         | 4,450.24         | 4,232.93         | 4,277.94         | 17,655.63         |
| 256                               | 2,380.12         | 1,941.86         | 1,740.15         | 1,953.30         | 8,015.42          |
| 257                               | 3,872.27         | 3,389.95         | 3,377.44         | 3,343.38         | 13,983.03         |
| 258                               | 3,442.95         | 3,156.37         | 2,857.09         | 2,662.24         | 12,118.65         |
| 259                               | 1,111.41         | 1,040.62         | 959.13           | 922.59           | 4,033.76          |
| 260                               | 3,039.88         | 2,910.45         | 2,862.12         | 2,772.20         | 11,584.64         |
| 261                               | 3,100.21         | 3,014.80         | 2,657.64         | 2,440.19         | 11,212.84         |
| 262                               | 2,009.92         | 1,935.41         | 1,832.64         | 1,735.92         | 7,513.89          |
| 263                               | 4,329.29         | 4,192.57         | 4,240.69         | 3,867.87         | 16,630.43         |
| 264                               | 1,128.51         | 1,088.30         | 1,002.97         | 1,048.46         | 4,268.25          |
| 265                               | 3,514.52         | 3,334.37         | 3,153.51         | 3,239.11         | 13,241.51         |
| 266                               | 1,085.70         | 1,063.61         | 989.20           | 941.57           | 4,080.08          |
| 267                               | 685.11           | 685.68           | 612.01           | 650.61           | 2,633.40          |
| 268                               | 326.41           | 302.75           | 290.65           | 276.58           | 1,196.40          |
| <b>WV - WEST VIRGINIA - Total</b> | <b>50,828.80</b> | <b>47,139.71</b> | <b>44,517.22</b> | <b>42,653.89</b> | <b>185,139.63</b> |

**STATE: WY - WYOMING**

| REGISTRANT ZIP CODE 3       | 1ST QUARTER      | 2ND QUARTER     | 3RD QUARTER     | 4TH QUARTER     | TOTAL GRAMS      |
|-----------------------------|------------------|-----------------|-----------------|-----------------|------------------|
| 820                         | 1,877.06         | 1,912.64        | 1,794.65        | 1,762.35        | 7,346.70         |
| 822                         | 428.80           | 404.72          | 410.97          | 382.87          | 1,627.35         |
| 823                         | 198.63           | 199.89          | 179.67          | 182.99          | 761.17           |
| 824                         | 1,076.33         | 1,035.40        | 1,073.41        | 1,041.16        | 4,226.30         |
| 825                         | 698.61           | 656.03          | 605.96          | 706.14          | 2,666.75         |
| 826                         | 1,913.43         | 1,925.16        | 1,890.89        | 1,847.22        | 7,576.70         |
| 827                         | 668.19           | 651.68          | 641.50          | 660.16          | 2,621.53         |
| 828                         | 1,053.55         | 987.18          | 1,004.09        | 939.96          | 3,984.78         |
| 829                         | 1,579.78         | 1,500.65        | 1,363.17        | 1,445.02        | 5,888.63         |
| 830                         | 171.89           | 167.71          | 205.06          | 158.11          | 702.77           |
| 831                         | 373.87           | 416.27          | 351.44          | 322.10          | 1,463.67         |
| <b>WY - WYOMING - Total</b> | <b>10,040.15</b> | <b>9,857.33</b> | <b>9,520.81</b> | <b>9,448.06</b> | <b>38,866.35</b> |

**DRUG: 9230 - MEPERIDINE (PETHIDINE)****STATE: AK - ALASKA**

| REGISTRANT ZIP CODE 3      | 1ST QUARTER   | 2ND QUARTER   | 3RD QUARTER   | 4TH QUARTER   | TOTAL GRAMS     |
|----------------------------|---------------|---------------|---------------|---------------|-----------------|
| 995                        | 465.05        | 247.29        | 202.62        | 162.86        | 1,077.83        |
| 996                        | 140.53        | 119.83        | 82.25         | 80.07         | 422.68          |
| 997                        | 53.82         | 70.59         | 97.50         | 40.31         | 262.21          |
| 998                        | 5.45          | 8.17          | 5.45          | 5.45          | 24.51           |
| 999                        | 2.29          | 1.09          | 0             | 5.45          | 8.82            |
| <b>AK - ALASKA - Total</b> | <b>667.13</b> | <b>446.97</b> | <b>387.82</b> | <b>294.13</b> | <b>1,796.05</b> |

**STATE: AL - ALABAMA**

| REGISTRANT ZIP CODE 3       | 1ST QUARTER     | 2ND QUARTER     | 3RD QUARTER     | 4TH QUARTER     | TOTAL GRAMS      |
|-----------------------------|-----------------|-----------------|-----------------|-----------------|------------------|
| 350                         | 735.33          | 515.25          | 413.96          | 444.47          | 2,109.01         |
| 351                         | 418.32          | 287.60          | 248.38          | 210.79          | 1,165.09         |
| 352                         | 730.43          | 612.45          | 602.97          | 400.35          | 2,346.19         |
| 354                         | 604.39          | 634.67          | 424.86          | 296.85          | 1,960.77         |
| 355                         | 302.54          | 178.66          | 153.06          | 131.27          | 765.53           |
| 356                         | 450.72          | 379.21          | 372.57          | 344.79          | 1,547.28         |
| 357                         | 307.75          | 167.22          | 163.41          | 164.50          | 802.87           |
| 358                         | 364.94          | 358.40          | 379.10          | 298.49          | 1,400.94         |
| 359                         | 306.22          | 199.88          | 309.38          | 237.48          | 1,052.97         |
| 360                         | 394.68          | 286.22          | 219.51          | 186.83          | 1,087.24         |
| 361                         | 255.57          | 260.36          | 204.80          | 187.37          | 908.10           |
| 362                         | 353.50          | 227.13          | 218.96          | 160.14          | 959.74           |
| 363                         | 625.26          | 515.47          | 363.85          | 308.29          | 1,812.87         |
| 364                         | 258.18          | 285.96          | 217.88          | 146.52          | 908.54           |
| 365                         | 572.47          | 590.99          | 431.94          | 321.37          | 1,916.76         |
| 366                         | 735.83          | 957.69          | 767.14          | 306.66          | 2,767.32         |
| 367                         | 123.64          | 115.47          | 101.31          | 107.85          | 448.28           |
| 368                         | 359.49          | 354.05          | 264.17          | 254.91          | 1,232.63         |
| 369                         | 3.27            | 17.97           | 3.27            | 8.72            | 33.23            |
| <b>AL - ALABAMA - Total</b> | <b>7,902.52</b> | <b>6,944.66</b> | <b>5,860.51</b> | <b>4,517.64</b> | <b>25,225.33</b> |

**STATE: AR - ARKANSAS**

| REGISTRANT ZIP CODE 3        | 1ST QUARTER     | 2ND QUARTER     | 3RD QUARTER     | 4TH QUARTER     | TOTAL GRAMS      |
|------------------------------|-----------------|-----------------|-----------------|-----------------|------------------|
| 716                          | 514.95          | 412.00          | 460.59          | 326.81          | 1,714.35         |
| 717                          | 244.02          | 157.57          | 148.70          | 129.09          | 679.38           |
| 718                          | 51.75           | 53.92           | 64.82           | 59.37           | 229.86           |
| 719                          | 340.97          | 272.34          | 261.45          | 153.06          | 1,027.83         |
| 720                          | 993.29          | 754.22          | 799.60          | 800.69          | 3,347.80         |
| 721                          | 1,039.53        | 1,337.97        | 974.99          | 857.34          | 4,209.82         |
| 722                          | 821.58          | 773.39          | 744.59          | 563.21          | 2,902.77         |
| 723                          | 184.65          | 239.66          | 173.21          | 90.42           | 687.94           |
| 724                          | 616.59          | 462.44          | 456.45          | 302.85          | 1,838.32         |
| 725                          | 209.05          | 165.59          | 175.93          | 102.40          | 652.97           |
| 726                          | 223.87          | 144.34          | 151.97          | 115.47          | 635.65           |
| 727                          | 1,003.86        | 898.19          | 714.63          | 593.71          | 3,210.39         |
| 728                          | 199.36          | 136.17          | 154.69          | 49.57           | 539.79           |
| 729                          | 308.84          | 221.14          | 266.35          | 171.58          | 967.91           |
| <b>AR - ARKANSAS - Total</b> | <b>6,752.29</b> | <b>6,028.95</b> | <b>5,547.97</b> | <b>4,315.56</b> | <b>22,644.77</b> |

**STATE: AZ - ARIZONA**

| REGISTRANT ZIP CODE 3 | 1ST QUARTER | 2ND QUARTER | 3RD QUARTER | 4TH QUARTER | TOTAL GRAMS |
|-----------------------|-------------|-------------|-------------|-------------|-------------|
|-----------------------|-------------|-------------|-------------|-------------|-------------|

|                             |                 |                 |                 |                 |                  |
|-----------------------------|-----------------|-----------------|-----------------|-----------------|------------------|
| 850                         | 1,096.76        | 888.15          | 908.43          | 931.42          | 3,824.75         |
| 851                         | 173.76          | 165.04          | 117.65          | 104.58          | 561.03           |
| 852                         | 1,824.90        | 1,910.28        | 1,544.49        | 1,075.23        | 6,354.91         |
| 853                         | 554.49          | 615.82          | 519.13          | 463.07          | 2,152.52         |
| 855                         | 139.44          | 160.68          | 116.56          | 84.97           | 501.66           |
| 856                         | 112.75          | 174.30          | 191.19          | 90.96           | 569.20           |
| 857                         | 936.86          | 694.48          | 752.21          | 615.50          | 2,999.05         |
| 859                         | 29.96           | 27.23           | 5.45            | 19.61           | 82.25            |
| 860                         | 50.66           | 51.79           | 65.95           | 38.80           | 207.20           |
| 863                         | 110.57          | 103.49          | 67.63           | 45.25           | 326.94           |
| 864                         | 355.35          | 167.22          | 145.98          | 104.04          | 772.58           |
| 865                         | 2.72            | 2.18            | 4.90            | 1.09            | 10.89            |
| <b>AZ - ARIZONA - Total</b> | <b>5,388.22</b> | <b>4,960.67</b> | <b>4,439.57</b> | <b>3,574.52</b> | <b>18,362.98</b> |

**STATE: CA - CALIFORNIA**

| REGISTRANT ZIP CODE 3 | 1ST QUARTER | 2ND QUARTER | 3RD QUARTER | 4TH QUARTER | TOTAL GRAMS |
|-----------------------|-------------|-------------|-------------|-------------|-------------|
| 900                   | 806.68      | 719.53      | 607.87      | 483.14      | 2,617.22    |
| 902                   | 529.98      | 608.96      | 435.21      | 438.47      | 2,012.62    |
| 903                   | 2.18        | 11.44       | 2.18        | 4.36        | 20.15       |
| 904                   | 164.50      | 75.17       | 90.42       | 139.44      | 469.52      |
| 905                   | 239.12      | 386.73      | 278.88      | 181.93      | 1,086.65    |
| 906                   | 153.06      | 117.00      | 71.35       | 103.49      | 444.90      |
| 907                   | 215.15      | 108.94      | 59.92       | 43.58       | 427.58      |
| 908                   | 197.94      | 88.78       | 49.02       | 63.73       | 399.47      |
| 910                   | 93.14       | 84.97       | 41.40       | 54.47       | 273.98      |
| 911                   | 131.27      | 67.00       | 115.47      | 127.46      | 441.20      |
| 912                   | 215.15      | 138.90      | 209.16      | 129.64      | 692.84      |
| 913                   | 721.06      | 833.37      | 553.95      | 583.91      | 2,692.28    |
| 914                   | 248.81      | 180.84      | 96.95       | 150.33      | 676.94      |
| 915                   | 89.33       | 140.53      | 131.81      | 153.60      | 515.27      |
| 916                   | 2.18        | 19.61       | 8.72        | 4.36        | 34.86       |
| 917                   | 1,236.44    | 918.89      | 963.01      | 803.96      | 3,922.29    |
| 918                   | 96.95       | 45.75       | 176.48      | 19.61       | 338.80      |
| 919                   | 131.27      | 135.08      | 121.47      | 104.04      | 491.85      |
| 920                   | 1,607.05    | 1,066.17    | 621.49      | 651.45      | 3,946.15    |
| 921                   | 976.08      | 792.41      | 407.97      | 485.86      | 2,662.32    |
| 922                   | 275.07      | 244.56      | 354.05      | 188.46      | 1,062.14    |
| 923                   | 674.32      | 831.19      | 574.65      | 437.38      | 2,517.55    |
| 924                   | 26.15       | 45.21       | 4.36        | 14.16       | 89.87       |
| 925                   | 867.14      | 943.94      | 820.30      | 386.18      | 3,017.57    |
| 926                   | 675.41      | 587.17      | 413.42      | 312.65      | 1,988.65    |



|                                |                  |                  |                  |                  |                  |
|--------------------------------|------------------|------------------|------------------|------------------|------------------|
| 927                            | 782.72           | 209.16           | 92.05            | 163.41           | 1,247.33         |
| 928                            | 629.11           | 550.13           | 404.16           | 283.24           | 1,866.64         |
| 930                            | 149.79           | 179.75           | 149.24           | 82.79            | 561.57           |
| 931                            | 174.84           | 217.33           | 154.69           | 176.48           | 723.35           |
| 932                            | 266.90           | 490.76           | 242.93           | 276.16           | 1,276.75         |
| 933                            | 682.49           | 794.70           | 677.05           | 572.47           | 2,726.71         |
| 934                            | 284.87           | 279.42           | 162.32           | 188.46           | 915.08           |
| 935                            | 232.04           | 77.35            | 117.00           | 83.88            | 510.26           |
| 936                            | 281.60           | 266.35           | 118.74           | 94.78            | 761.47           |
| 937                            | 474.64           | 401.11           | 216.24           | 153.60           | 1,245.59         |
| 939                            | 204.48           | 173.76           | 189.55           | 195.00           | 762.78           |
| 940                            | 308.84           | 308.84           | 219.51           | 210.25           | 1,047.43         |
| 941                            | 647.09           | 257.09           | 480.41           | 153.06           | 1,537.65         |
| 943                            | 364.40           | 285.96           | 133.99           | 65.91            | 850.26           |
| 944                            | 0.54             | 21.79            | 13.07            | 7.63             | 43.03            |
| 945                            | 835.55           | 1,013.12         | 765.29           | 630.20           | 3,244.16         |
| 946                            | 8.72             | 31.59            | 7.08             | 14.71            | 62.09            |
| 947                            | 8.72             | 0                | 0                | 0                | 8.72             |
| 948                            | 0                | 10.89            | 2.72             | 0                | 13.62            |
| 949                            | 95.32            | 26.69            | 46.30            | 27.23            | 195.54           |
| 950                            | 162.32           | 194.45           | 127.46           | 84.43            | 568.65           |
| 951                            | 220.05           | 194.45           | 63.73            | 75.17            | 553.40           |
| 952                            | 66.45            | 97.50            | 67.00            | 53.38            | 284.33           |
| 953                            | 800.36           | 1,060.51         | 509.28           | 431.94           | 2,802.09         |
| 954                            | 84.97            | 94.23            | 89.33            | 74.62            | 343.15           |
| 955                            | 47.39            | 39.22            | 27.23            | 37.04            | 150.88           |
| 956                            | 550.13           | 508.19           | 468.98           | 386.18           | 1,913.49         |
| 957                            | 18.52            | 51.20            | 14.16            | 26.69            | 110.57           |
| 958                            | 798.08           | 375.29           | 178.66           | 275.61           | 1,627.64         |
| 959                            | 251.10           | 218.42           | 233.67           | 179.75           | 882.94           |
| 960                            | 131.27           | 43.03            | 31.05            | 45.75            | 251.10           |
| 961                            | 28.32            | 11.98            | 35.40            | 33.77            | 109.48           |
| <b>CA - CALIFORNIA - Total</b> | <b>19,967.05</b> | <b>17,676.42</b> | <b>13,247.78</b> | <b>11,149.21</b> | <b>62,040.45</b> |

**STATE: CO - COLORADO**

| REGISTRANT ZIP CODE 3 | 1ST QUARTER | 2ND QUARTER | 3RD QUARTER | 4TH QUARTER | TOTAL GRAMS |
|-----------------------|-------------|-------------|-------------|-------------|-------------|
| 800                   | 114.38      | 175.39      | 117.11      | 58.28       | 465.16      |
| 801                   | 353.07      | 354.16      | 241.30      | 230.40      | 1,178.92    |
| 802                   | 192.17      | 166.13      | 104.04      | 117.11      | 579.44      |
| 803                   | 49.02       | 48.48       | 21.79       | 58.83       | 178.11      |
| 804                   | 51.20       | 65.36       | 46.84       | 40.31       | 203.71      |

|                              |                 |                 |                 |                 |                 |
|------------------------------|-----------------|-----------------|-----------------|-----------------|-----------------|
| 805                          | 90.96           | 129.09          | 105.67          | 60.46           | 386.18          |
| 806                          | 68.41           | 44.12           | 76.26           | 53.38           | 242.17          |
| 807                          | 18.52           | 23.97           | 15.25           | 5.99            | 63.73           |
| 808                          | 69.50           | 40.85           | 70.26           | 47.93           | 228.55          |
| 809                          | 217.88          | 164.50          | 168.31          | 170.49          | 721.17          |
| 810                          | 102.40          | 76.80           | 80.61           | 91.51           | 351.32          |
| 811                          | 17.43           | 8.72            | 13.62           | 7.08            | 46.84           |
| 812                          | 49.02           | 21.24           | 44.12           | 22.88           | 137.26          |
| 813                          | 10.35           | 11.44           | 15.25           | 11.44           | 48.48           |
| 814                          | 86.06           | 90.42           | 125.28          | 55.56           | 357.32          |
| 815                          | 51.64           | 65.36           | 75.17           | 33.23           | 225.39          |
| 816                          | 61.55           | 85.52           | 52.83           | 76.26           | 276.16          |
| <b>CO - COLORADO - Total</b> | <b>1,603.56</b> | <b>1,571.53</b> | <b>1,373.70</b> | <b>1,141.12</b> | <b>5,689.91</b> |

**STATE: CT - CONNECTICUT**

| REGISTRANT ZIP CODE 3           | 1ST QUARTER     | 2ND QUARTER   | 3RD QUARTER   | 4TH QUARTER   | TOTAL GRAMS     |
|---------------------------------|-----------------|---------------|---------------|---------------|-----------------|
| 060                             | 99.68           | 70.26         | 42.49         | 68.63         | 281.06          |
| 061                             | 74.62           | 65.36         | 65.36         | 85.52         | 290.86          |
| 062                             | 23.97           | 9.26          | 8.72          | 6.54          | 48.48           |
| 063                             | 175.93          | 82.79         | 208.62        | 166.67        | 634.02          |
| 064                             | 276.16          | 244.56        | 168.85        | 185.19        | 874.77          |
| 065                             | 75.38           | 45.75         | 61.01         | 70.26         | 252.41          |
| 066                             | 64.27           | 38.13         | 77.35         | 31.59         | 211.34          |
| 067                             | 129.09          | 129.64        | 113.30        | 100.22        | 472.24          |
| 068                             | 177.57          | 193.36        | 119.83        | 119.29        | 610.05          |
| 069                             | 4.90            | 5.99          | 6.54          | 2.18          | 19.61           |
| <b>CT - CONNECTICUT - Total</b> | <b>1,101.58</b> | <b>885.12</b> | <b>872.04</b> | <b>836.10</b> | <b>3,694.83</b> |

**STATE: DC - DISTRICT OF COLUMBIA**

| REGISTRANT ZIP CODE 3              | 1ST QUARTER   | 2ND QUARTER   | 3RD QUARTER   | 4TH QUARTER   | TOTAL GRAMS   |
|------------------------------------|---------------|---------------|---------------|---------------|---------------|
| 200                                | 144.34        | 162.32        | 130.18        | 196.63        | 633.47        |
| 204                                | 0             | 2.18          | 0             | 0             | 2.18          |
| <b>DC - DISTRICT OF COLUMBIA -</b> | <b>144.34</b> | <b>164.50</b> | <b>130.18</b> | <b>196.63</b> | <b>635.65</b> |

**STATE: DE - DELAWARE**

| REGISTRANT ZIP CODE 3        | 1ST QUARTER   | 2ND QUARTER   | 3RD QUARTER  | 4TH QUARTER   | TOTAL GRAMS   |
|------------------------------|---------------|---------------|--------------|---------------|---------------|
| 197                          | 118.63        | 26.15         | 37.58        | 58.83         | 241.19        |
| 198                          | 41.40         | 8.72          | 3.27         | 17.43         | 70.81         |
| 199                          | 63.73         | 71.90         | 56.65        | 56.10         | 248.38        |
| <b>DE - DELAWARE - Total</b> | <b>223.76</b> | <b>106.76</b> | <b>97.50</b> | <b>132.36</b> | <b>560.37</b> |

**STATE: FL - FLORIDA**

| REGISTRANT ZIP CODE 3 | 1ST QUARTER | 2ND QUARTER | 3RD QUARTER | 4TH QUARTER | TOTAL GRAMS |
|-----------------------|-------------|-------------|-------------|-------------|-------------|
| 320                   | 290.32      | 246.74      | 260.91      | 189.01      | 986.97      |

|                             |                 |                 |                 |                 |                  |
|-----------------------------|-----------------|-----------------|-----------------|-----------------|------------------|
| 321                         | 217.88          | 258.73          | 168.85          | 194.45          | 839.91           |
| 322                         | 461.35          | 425.95          | 302.30          | 284.87          | 1,474.47         |
| 323                         | 528.02          | 349.69          | 232.58          | 218.42          | 1,328.71         |
| 324                         | 121.47          | 161.23          | 113.30          | 87.69           | 483.68           |
| 325                         | 597.52          | 448.28          | 368.75          | 285.96          | 1,700.51         |
| 326                         | 297.94          | 92.60           | 99.13           | 113.30          | 602.97           |
| 327                         | 291.95          | 177.57          | 176.48          | 149.24          | 795.24           |
| 328                         | 162.32          | 125.28          | 86.61           | 78.44           | 452.64           |
| 329                         | 413.96          | 357.32          | 274.52          | 221.69          | 1,267.49         |
| 330                         | 872.59          | 611.68          | 424.86          | 307.20          | 2,216.33         |
| 331                         | 854.07          | 633.47          | 588.81          | 431.39          | 2,507.74         |
| 333                         | 651.77          | 715.72          | 405.79          | 446.64          | 2,219.93         |
| 334                         | 689.57          | 643.82          | 483.68          | 378.56          | 2,195.64         |
| 335                         | 380.19          | 370.93          | 268.10          | 198.27          | 1,217.49         |
| 336                         | 420.39          | 574.21          | 433.57          | 317.55          | 1,745.72         |
| 337                         | 136.17          | 181.93          | 136.72          | 121.47          | 576.28           |
| 338                         | 457.86          | 411.24          | 368.75          | 297.94          | 1,535.80         |
| 339                         | 487.06          | 373.66          | 362.22          | 359.49          | 1,582.43         |
| 341                         | 165.59          | 95.87           | 52.29           | 102.95          | 416.69           |
| 342                         | 206.98          | 197.72          | 162.32          | 107.30          | 674.32           |
| 344                         | 334.98          | 257.09          | 246.74          | 147.61          | 986.43           |
| 346                         | 143.25          | 229.86          | 156.87          | 143.25          | 673.23           |
| 347                         | 204.26          | 130.18          | 87.15           | 73.53           | 495.12           |
| 349                         | 248.38          | 258.51          | 232.58          | 217.88          | 957.34           |
| <b>FL - FLORIDA - Total</b> | <b>9,635.85</b> | <b>8,329.25</b> | <b>6,493.87</b> | <b>5,474.11</b> | <b>29,933.08</b> |

**STATE: GA - GEORGIA**

| REGISTRANT ZIP CODE 3 | 1ST QUARTER | 2ND QUARTER | 3RD QUARTER | 4TH QUARTER | TOTAL GRAMS |
|-----------------------|-------------|-------------|-------------|-------------|-------------|
| 300                   | 1,382.20    | 999.50      | 852.44      | 695.02      | 3,929.16    |
| 301                   | 928.91      | 965.73      | 656.35      | 601.34      | 3,152.32    |
| 302                   | 612.77      | 663.97      | 410.69      | 416.14      | 2,103.58    |
| 303                   | 532.27      | 508.74      | 411.78      | 243.48      | 1,696.27    |
| 304                   | 428.67      | 240.75      | 257.09      | 171.58      | 1,098.09    |
| 305                   | 567.02      | 568.11      | 503.84      | 269.62      | 1,908.59    |
| 306                   | 323.00      | 376.38      | 295.77      | 221.69      | 1,216.83    |
| 307                   | 618.77      | 556.13      | 513.10      | 429.21      | 2,117.20    |
| 308                   | 184.65      | 190.10      | 161.23      | 133.99      | 669.97      |
| 309                   | 480.20      | 355.68      | 341.52      | 300.12      | 1,477.52    |
| 310                   | 748.23      | 815.81      | 492.62      | 492.94      | 2,549.60    |
| 312                   | 252.19      | 187.92      | 183.56      | 130.18      | 753.85      |
| 313                   | 264.17      | 212.97      | 189.55      | 143.25      | 809.95      |

|                             |                  |                 |                 |                 |                  |
|-----------------------------|------------------|-----------------|-----------------|-----------------|------------------|
| 314                         | 279.97           | 283.24          | 268.53          | 142.71          | 974.45           |
| 315                         | 461.35           | 642.19          | 441.20          | 346.42          | 1,891.16         |
| 316                         | 784.79           | 771.02          | 638.90          | 554.49          | 2,749.19         |
| 317                         | 892.63           | 678.59          | 508.19          | 465.16          | 2,544.58         |
| 318                         | 29.96            | 44.66           | 35.40           | 27.23           | 137.26           |
| 319                         | 307.73           | 243.19          | 376.16          | 188.46          | 1,115.54         |
| 398                         | 191.14           | 162.30          | 92.05           | 119.29          | 564.78           |
| <b>GA - GEORGIA - Total</b> | <b>10,270.61</b> | <b>9,466.97</b> | <b>7,629.96</b> | <b>6,092.33</b> | <b>33,459.87</b> |

**STATE: GU - GUAM**

| REGISTRANT ZIP CODE 3    | 1ST QUARTER  | 2ND QUARTER  | 3RD QUARTER  | 4TH QUARTER  | TOTAL GRAMS   |
|--------------------------|--------------|--------------|--------------|--------------|---------------|
| 969                      | 14.16        | 35.95        | 40.85        | 29.96        | 120.92        |
| <b>GU - GUAM - Total</b> | <b>14.16</b> | <b>35.95</b> | <b>40.85</b> | <b>29.96</b> | <b>120.92</b> |

**STATE: HI - HAWAII**

| REGISTRANT ZIP CODE 3      | 1ST QUARTER   | 2ND QUARTER   | 3RD QUARTER   | 4TH QUARTER   | TOTAL GRAMS     |
|----------------------------|---------------|---------------|---------------|---------------|-----------------|
| 967                        | 120.38        | 246.20        | 228.22        | 131.27        | 726.07          |
| 968                        | 126.80        | 156.11        | 124.19        | 101.31        | 508.41          |
| <b>HI - HAWAII - Total</b> | <b>247.18</b> | <b>402.31</b> | <b>352.41</b> | <b>232.58</b> | <b>1,234.48</b> |

**STATE: IA - IOWA**

| REGISTRANT ZIP CODE 3 | 1ST QUARTER | 2ND QUARTER | 3RD QUARTER | 4TH QUARTER | TOTAL GRAMS |
|-----------------------|-------------|-------------|-------------|-------------|-------------|
| 500                   | 42.49       | 241.49      | 35.95       | 29.96       | 349.89      |
| 501                   | 32.68       | 38.13       | 50.11       | 23.97       | 144.89      |
| 502                   | 115.47      | 113.84      | 102.95      | 98.04       | 430.30      |
| 503                   | 393.81      | 476.60      | 359.49      | 437.93      | 1,667.83    |
| 504                   | 1.09        | 5.99        | 7.63        | 9.26        | 23.97       |
| 505                   | 76.26       | 27.23       | 81.16       | 61.55       | 246.20      |
| 506                   | 45.75       | 36.49       | 38.13       | 10.89       | 131.27      |
| 507                   | 370.93      | 106.76      | 103.49      | 198.81      | 779.99      |
| 508                   | 21.24       | 4.90        | 2.18        | 17.97       | 46.30       |
| 510                   | 12.53       | 31.59       | 10.35       | 31.59       | 86.06       |
| 511                   | 39.22       | 96.95       | 30.50       | 46.84       | 213.52      |
| 512                   | 2.18        | 5.45        | 0           | 2.18        | 9.80        |
| 513                   | 50.11       | 25.60       | 1.09        | 2.18        | 78.98       |
| 514                   | 8.17        | 5.45        | 3.27        | 8.72        | 25.60       |
| 515                   | 17.95       | 41.40       | 13.62       | 25.60       | 98.57       |
| 516                   | 0           | 1.09        | 4.36        | 2.18        | 7.63        |
| 520                   | 14.16       | 15.25       | 14.16       | 14.16       | 57.74       |
| 521                   | 1.09        | 1.09        | 2.18        | 0           | 4.36        |
| 522                   | 101.31      | 114.93      | 39.76       | 52.83       | 308.84      |
| 523                   | 63.18       | 43.58       | 59.92       | 95.87       | 262.54      |
| 524                   | 240.21      | 177.57      | 234.76      | 183.56      | 836.10      |

|                          |                 |                 |                 |                 |                 |
|--------------------------|-----------------|-----------------|-----------------|-----------------|-----------------|
| 525                      | 128.00          | 76.80           | 72.99           | 108.94          | <b>386.73</b>   |
| 526                      | 26.15           | 117.65          | 8.72            | 46.84           | <b>199.36</b>   |
| 527                      | 37.58           | 30.50           | 8.72            | 11.44           | <b>88.24</b>    |
| 528                      | 19.61           | 53.92           | 9.80            | 19.61           | <b>102.95</b>   |
| <b>IA - IOWA - Total</b> | <b>1,861.18</b> | <b>1,890.26</b> | <b>1,295.27</b> | <b>1,540.92</b> | <b>6,587.62</b> |

**STATE: ID - IDAHO**

| REGISTRANT ZIP CODE 3     | 1ST QUARTER   | 2ND QUARTER   | 3RD QUARTER   | 4TH QUARTER   | TOTAL GRAMS     |
|---------------------------|---------------|---------------|---------------|---------------|-----------------|
| 832                       | 101.86        | 108.94        | 61.01         | 89.33         | <b>361.13</b>   |
| 833                       | 77.89         | 84.43         | 25.06         | 56.10         | <b>243.48</b>   |
| 834                       | 123.10        | 120.38        | 118.20        | 125.28        | <b>486.95</b>   |
| 835                       | 45.54         | 27.78         | 30.50         | 5.99          | <b>109.81</b>   |
| 836                       | 228.77        | 290.32        | 207.53        | 251.65        | <b>978.26</b>   |
| 837                       | 102.95        | 76.26         | 77.35         | 117.11        | <b>373.66</b>   |
| 838                       | 61.77         | 69.72         | 53.92         | 49.02         | <b>234.43</b>   |
| <b>ID - IDAHO - Total</b> | <b>741.86</b> | <b>777.81</b> | <b>573.56</b> | <b>694.48</b> | <b>2,787.71</b> |

**STATE: IL - ILLINOIS**

| REGISTRANT ZIP CODE 3 | 1ST QUARTER | 2ND QUARTER | 3RD QUARTER | 4TH QUARTER | TOTAL GRAMS     |
|-----------------------|-------------|-------------|-------------|-------------|-----------------|
| 600                   | 273.43      | 263.63      | 228.77      | 181.93      | <b>947.76</b>   |
| 601                   | 449.37      | 447.19      | 265.70      | 179.75      | <b>1,342.00</b> |
| 602                   | 1.09        | 1.09        | 0           | 0.54        | <b>2.72</b>     |
| 603                   | 0           | 3.27        | 1.09        | 2.18        | <b>6.54</b>     |
| 604                   | 245.11      | 266.90      | 230.40      | 179.75      | <b>922.16</b>   |
| 605                   | 100.33      | 156.87      | 96.95       | 116.56      | <b>470.72</b>   |
| 606                   | 186.28      | 132.36      | 176.48      | 100.77      | <b>595.89</b>   |
| 607                   | 6.54        | 8.72        | 8.72        | 8.72        | <b>32.68</b>    |
| 608                   | 52.29       | 43.58       | 61.01       | 47.93       | <b>204.80</b>   |
| 609                   | 4.90        | 8.72        | 0           | 4.36        | <b>17.97</b>    |
| 610                   | 132.58      | 107.15      | 89.33       | 70.81       | <b>399.87</b>   |
| 611                   | 59.92       | 45.75       | 38.13       | 42.49       | <b>186.28</b>   |
| 612                   | 7.08        | 6.54        | 9.26        | 7.08        | <b>29.96</b>    |
| 613                   | 17.43       | 53.38       | 15.80       | 52.29       | <b>138.90</b>   |
| 614                   | 18.52       | 28.87       | 13.07       | 26.15       | <b>86.61</b>    |
| 615                   | 43.58       | 33.77       | 55.56       | 4.90        | <b>137.81</b>   |
| 616                   | 89.33       | 126.37      | 87.15       | 37.04       | <b>339.89</b>   |
| 617                   | 44.01       | 60.18       | 42.49       | 14.16       | <b>160.84</b>   |
| 618                   | 205.35      | 126.37      | 85.52       | 86.06       | <b>503.29</b>   |
| 619                   | 32.68       | 45.75       | 51.20       | 35.95       | <b>165.59</b>   |
| 620                   | 26.15       | 10.89       | 16.34       | 5.45        | <b>58.83</b>    |
| 622                   | 200.45      | 317.55      | 218.42      | 129.64      | <b>866.05</b>   |
| 623                   | 70.26       | 102.95      | 37.04       | 39.76       | <b>250.01</b>   |

|                              |                 |                 |                 |                 |                 |
|------------------------------|-----------------|-----------------|-----------------|-----------------|-----------------|
| 624                          | 9.80            | 16.89           | 34.86           | 2.72            | <b>64.27</b>    |
| 625                          | 29.41           | 1.09            | 2.18            | 7.63            | <b>40.31</b>    |
| 626                          | 59.92           | 43.58           | 48.48           | 33.77           | <b>185.74</b>   |
| 627                          | 68.74           | 107.85          | 62.64           | 65.36           | <b>304.59</b>   |
| 628                          | 102.40          | 50.37           | 74.08           | 43.58           | <b>270.43</b>   |
| 629                          | 281.06          | 201.53          | 163.41          | 234.22          | <b>880.22</b>   |
| <b>IL - ILLINOIS - Total</b> | <b>2,818.00</b> | <b>2,819.13</b> | <b>2,214.05</b> | <b>1,761.52</b> | <b>9,612.69</b> |

**STATE: IN - INDIANA**

| REGISTRANT ZIP CODE 3       | 1ST QUARTER     | 2ND QUARTER     | 3RD QUARTER     | 4TH QUARTER     | TOTAL GRAMS      |
|-----------------------------|-----------------|-----------------|-----------------|-----------------|------------------|
| 460                         | 278.88          | 162.32          | 292.50          | 194.45          | <b>928.15</b>    |
| 461                         | 423.22          | 223.32          | 318.10          | 224.96          | <b>1,189.60</b>  |
| 462                         | 870.08          | 936.32          | 794.15          | 523.99          | <b>3,124.55</b>  |
| 463                         | 233.13          | 187.92          | 147.61          | 99.13           | <b>667.79</b>    |
| 464                         | 49.57           | 49.02           | 51.20           | 24.51           | <b>174.30</b>    |
| 465                         | 71.90           | 64.27           | 59.37           | 41.40           | <b>236.94</b>    |
| 466                         | 28.32           | 17.43           | 31.05           | 18.52           | <b>95.32</b>     |
| 467                         | 56.21           | 34.32           | 19.39           | 20.70           | <b>130.62</b>    |
| 468                         | 187.37          | 170.49          | 143.80          | 122.01          | <b>623.67</b>    |
| 469                         | 110.57          | 116.02          | 46.30           | 32.14           | <b>305.03</b>    |
| 470                         | 48.46           | 128.81          | 57.74           | 42.49           | <b>277.49</b>    |
| 471                         | 128.70          | 235.31          | 138.90          | 80.07           | <b>582.97</b>    |
| 472                         | 125.82          | 120.92          | 139.44          | 72.99           | <b>459.17</b>    |
| 473                         | 111.66          | 81.70           | 76.26           | 82.25           | <b>351.87</b>    |
| 474                         | 25.60           | 34.86           | 33.77           | 11.44           | <b>105.67</b>    |
| 475                         | 47.93           | 59.63           | 51.20           | 38.67           | <b>197.44</b>    |
| 476                         | 46.84           | 147.61          | 73.53           | 30.50           | <b>298.49</b>    |
| 477                         | 138.79          | 145.98          | 94.23           | 81.70           | <b>460.70</b>    |
| 478                         | 91.51           | 90.42           | 73.53           | 55.56           | <b>311.02</b>    |
| 479                         | 72.99           | 53.38           | 55.01           | 42.49           | <b>223.87</b>    |
| <b>IN - INDIANA - Total</b> | <b>3,147.55</b> | <b>3,060.03</b> | <b>2,697.07</b> | <b>1,839.95</b> | <b>10,744.61</b> |

**STATE: KS - KANSAS**

| REGISTRANT ZIP CODE 3 | 1ST QUARTER | 2ND QUARTER | 3RD QUARTER | 4TH QUARTER | TOTAL GRAMS   |
|-----------------------|-------------|-------------|-------------|-------------|---------------|
| 660                   | 143.80      | 265.81      | 195.00      | 113.84      | <b>718.44</b> |
| 661                   | 35.95       | 26.69       | 24.51       | 19.61       | <b>106.76</b> |
| 662                   | 213.52      | 144.34      | 128.55      | 110.57      | <b>596.98</b> |
| 664                   | 49.81       | 29.59       | 22.31       | 11.98       | <b>113.69</b> |
| 665                   | 16.34       | 49.02       | 38.13       | 19.61       | <b>123.10</b> |
| 666                   | 40.85       | 76.26       | 21.79       | 16.34       | <b>155.24</b> |
| 667                   | 62.64       | 77.61       | 95.32       | 82.25       | <b>317.81</b> |
| 668                   | 21.79       | 22.88       | 15.80       | 13.62       | <b>74.08</b>  |

|                            |                 |                 |                 |               |                 |
|----------------------------|-----------------|-----------------|-----------------|---------------|-----------------|
| 669                        | 10.35           | 14.71           | 13.62           | 11.44         | 50.11           |
| 670                        | 111.12          | 97.50           | 84.43           | 55.01         | 348.06          |
| 671                        | 72.99           | 29.41           | 45.21           | 33.77         | 181.38          |
| 672                        | 300.67          | 240.21          | 278.88          | 181.38        | 1,001.14        |
| 673                        | 57.74           | 41.40           | 28.32           | 11.98         | 139.44          |
| 674                        | 72.99           | 78.44           | 44.66           | 77.35         | 273.43          |
| 675                        | 109.48          | 112.21          | 88.24           | 89.87         | 399.80          |
| 676                        | 101.31          | 53.38           | 77.35           | 62.09         | 294.13          |
| 677                        | 10.35           | 30.50           | 27.78           | 7.63          | 76.26           |
| 678                        | 85.52           | 71.90           | 82.79           | 27.23         | 267.44          |
| 679                        | 27.23           | 50.11           | 54.47           | 53.92         | 185.74          |
| <b>KS - KANSAS - Total</b> | <b>1,544.43</b> | <b>1,511.94</b> | <b>1,367.14</b> | <b>999.50</b> | <b>5,423.02</b> |

**STATE: KY - KENTUCKY**

| REGISTRANT ZIP CODE 3 | 1ST QUARTER | 2ND QUARTER | 3RD QUARTER | 4TH QUARTER | TOTAL GRAMS |
|-----------------------|-------------|-------------|-------------|-------------|-------------|
| 400                   | 53.90       | 32.14       | 21.79       | 15.25       | 123.08      |
| 401                   | 61.55       | 34.32       | 9.80        | 7.08        | 112.75      |
| 402                   | 502.75      | 271.25      | 319.73      | 201.53      | 1,295.27    |
| 403                   | 112.75      | 81.70       | 71.90       | 65.91       | 332.26      |
| 404                   | 43.03       | 51.20       | 47.39       | 48.48       | 190.10      |
| 405                   | 137.81      | 64.82       | 31.59       | 81.70       | 315.92      |
| 406                   | 17.43       | 4.36        | 0.54        | 6.54        | 28.87       |
| 407                   | 41.40       | 38.67       | 28.32       | 28.32       | 136.72      |
| 408                   | 35.40       | 138.35      | 70.16       | 38.67       | 282.58      |
| 409                   | 47.93       | 47.39       | 29.41       | 9.26        | 133.99      |
| 410                   | 238.25      | 57.85       | 64.82       | 60.46       | 421.37      |
| 411                   | 45.75       | 54.47       | 52.29       | 37.04       | 189.55      |
| 412                   | 0           | 0           | 0.54        | 0.54        | 1.09        |
| 413                   | 12.53       | 15.80       | 2.72        | 9.26        | 40.31       |
| 415                   | 38.13       | 26.15       | 31.05       | 19.06       | 114.38      |
| 416                   | 30.18       | 46.84       | 27.23       | 16.34       | 120.59      |
| 417                   | 19.06       | 178.66      | 0           | 7.63        | 205.35      |
| 418                   | 61.01       | 69.72       | 29.96       | 44.66       | 205.35      |
| 420                   | 448.36      | 310.73      | 286.51      | 177.02      | 1,222.63    |
| 421                   | 294.78      | 264.72      | 234.22      | 190.10      | 983.81      |
| 422                   | 160.14      | 171.58      | 104.04      | 73.53       | 509.28      |
| 423                   | 118.20      | 81.14       | 61.01       | 96.95       | 357.29      |
| 424                   | 132.90      | 139.44      | 118.20      | 99.68       | 490.22      |
| 425                   | 92.60       | 70.81       | 42.49       | 53.38       | 259.27      |
| 426                   | 1.09        | 17.43       | 31.59       | 23.42       | 73.53       |
| 427                   | 90.96       | 143.25      | 93.14       | 75.71       | 403.07      |

|                              |                 |                 |                 |                 |                 |
|------------------------------|-----------------|-----------------|-----------------|-----------------|-----------------|
| <b>KY - KENTUCKY - Total</b> | <b>2,837.89</b> | <b>2,412.77</b> | <b>1,810.43</b> | <b>1,487.54</b> | <b>8,548.63</b> |
|------------------------------|-----------------|-----------------|-----------------|-----------------|-----------------|

**STATE: LA - LOUISIANA**

| REGISTRANT ZIP CODE 3         | 1ST QUARTER     | 2ND QUARTER     | 3RD QUARTER     | 4TH QUARTER     | TOTAL GRAMS      |
|-------------------------------|-----------------|-----------------|-----------------|-----------------|------------------|
| 700                           | 813.44          | 577.37          | 515.27          | 498.93          | 2,405.01         |
| 701                           | 407.64          | 165.59          | 109.48          | 108.94          | 791.65           |
| 703                           | 363.85          | 361.89          | 276.16          | 192.27          | 1,194.17         |
| 704                           | 607.76          | 602.90          | 473.33          | 413.96          | 2,097.96         |
| 705                           | 1,270.67        | 1,307.75        | 946.67          | 727.16          | 4,252.24         |
| 706                           | 484.97          | 494.29          | 407.97          | 287.60          | 1,674.83         |
| 707                           | 344.79          | 398.17          | 344.24          | 284.33          | 1,371.52         |
| 708                           | 697.90          | 525.08          | 467.34          | 308.29          | 1,998.61         |
| 710                           | 226.59          | 295.22          | 206.98          | 206.44          | 935.23           |
| 711                           | 669.42          | 772.37          | 555.58          | 370.39          | 2,367.76         |
| 712                           | 546.04          | 514.73          | 483.14          | 259.27          | 1,803.18         |
| 713                           | 275.61          | 279.42          | 231.49          | 165.59          | 952.11           |
| 714                           | 257.64          | 194.45          | 130.73          | 145.98          | 728.79           |
| <b>LA - LOUISIANA - Total</b> | <b>6,966.31</b> | <b>6,489.23</b> | <b>5,148.39</b> | <b>3,969.14</b> | <b>22,573.07</b> |

**STATE: MA - MASSACHUSETTS**

| REGISTRANT ZIP CODE 3             | 1ST QUARTER     | 2ND QUARTER     | 3RD QUARTER     | 4TH QUARTER     | TOTAL GRAMS     |
|-----------------------------------|-----------------|-----------------|-----------------|-----------------|-----------------|
| 010                               | 256.87          | 240.75          | 220.05          | 236.39          | 954.07          |
| 011                               | 83.88           | 30.50           | 6.54            | 23.42           | 144.34          |
| 012                               | 0               | 34.86           | 0               | 4.90            | 39.76           |
| 013                               | 27.78           | 17.43           | 9.80            | 4.36            | 59.37           |
| 014                               | 98.04           | 70.81           | 71.90           | 98.04           | 338.80          |
| 015                               | 40.31           | 38.13           | 37.04           | 39.76           | 155.24          |
| 016                               | 82.68           | 27.23           | 20.70           | 26.69           | 157.31          |
| 017                               | 116.24          | 113.84          | 111.66          | 145.43          | 487.17          |
| 018                               | 90.42           | 129.64          | 129.09          | 108.39          | 457.54          |
| 019                               | 184.87          | 154.69          | 176.48          | 103.49          | 619.53          |
| 020                               | 118.74          | 71.90           | 123.10          | 71.35           | 385.09          |
| 021                               | 451.26          | 306.88          | 207.53          | 200.99          | 1,166.66        |
| 022                               | 27.02           | 43.03           | 16.34           | 14.16           | 100.55          |
| 023                               | 151.75          | 175.39          | 174.30          | 173.21          | 674.65          |
| 024                               | 101.75          | 101.31          | 75.71           | 71.35           | 350.13          |
| 025                               | 96.41           | 67.54           | 66.45           | 70.81           | 301.21          |
| 026                               | 37.04           | 27.23           | 11.44           | 19.61           | 95.32           |
| 027                               | 132.47          | 142.16          | 115.47          | 90.96           | 481.07          |
| <b>MA - MASSACHUSETTS - Total</b> | <b>2,097.53</b> | <b>1,793.33</b> | <b>1,573.60</b> | <b>1,503.34</b> | <b>6,967.80</b> |

**STATE: MD - MARYLAND**

| REGISTRANT ZIP CODE 3 | 1ST QUARTER | 2ND QUARTER | 3RD QUARTER | 4TH QUARTER | TOTAL GRAMS |
|-----------------------|-------------|-------------|-------------|-------------|-------------|
|-----------------------|-------------|-------------|-------------|-------------|-------------|



|                              |                 |                 |                 |                 |                 |
|------------------------------|-----------------|-----------------|-----------------|-----------------|-----------------|
| 206                          | 97.50           | 77.89           | 107.30          | 100.77          | <b>383.46</b>   |
| 207                          | 209.70          | 224.41          | 171.03          | 139.98          | <b>745.13</b>   |
| 208                          | 315.27          | 419.95          | 181.93          | 250.01          | <b>1,167.16</b> |
| 209                          | 39.76           | 7.08            | 5.99            | 39.76           | <b>92.60</b>    |
| 210                          | 329.97          | 388.91          | 382.92          | 349.14          | <b>1,450.94</b> |
| 211                          | 134.54          | 137.81          | 146.52          | 125.28          | <b>544.14</b>   |
| 212                          | 546.87          | 479.87          | 408.52          | 306.11          | <b>1,741.37</b> |
| 214                          | 159.05          | 131.81          | 44.66           | 95.87           | <b>431.39</b>   |
| 215                          | 159.05          | 78.98           | 86.06           | 38.67           | <b>362.76</b>   |
| 216                          | 70.26           | 63.73           | 53.92           | 56.65           | <b>244.56</b>   |
| 217                          | 55.01           | 87.15           | 52.29           | 34.32           | <b>228.77</b>   |
| 218                          | 98.04           | 69.72           | 80.61           | 49.02           | <b>297.40</b>   |
| 219                          | 2.18            | 0.54            | 4.90            | 1.09            | <b>8.72</b>     |
| <b>MD - MARYLAND - Total</b> | <b>2,217.20</b> | <b>2,167.86</b> | <b>1,726.66</b> | <b>1,586.67</b> | <b>7,698.40</b> |

**STATE: ME - MAINE**

| REGISTRANT ZIP CODE 3     | 1ST QUARTER   | 2ND QUARTER   | 3RD QUARTER   | 4TH QUARTER   | TOTAL GRAMS     |
|---------------------------|---------------|---------------|---------------|---------------|-----------------|
| 039                       | 7.41          | 13.51         | 10.89         | 9.80          | <b>41.61</b>    |
| 040                       | 99.57         | 60.46         | 103.49        | 87.69         | <b>351.21</b>   |
| 041                       | 5.45          | 62.64         | 22.88         | 39.22         | <b>130.18</b>   |
| 042                       | 15.25         | 13.62         | 20.70         | 10.35         | <b>59.92</b>    |
| 043                       | 0.87          | 0             | 9.80          | 0             | <b>10.68</b>    |
| 044                       | 85.73         | 27.23         | 21.79         | 19.61         | <b>154.36</b>   |
| 046                       | 27.23         | 52.29         | 29.41         | 46.30         | <b>155.24</b>   |
| 047                       | 76.26         | 87.15         | 79.52         | 86.61         | <b>329.54</b>   |
| 048                       | 4.36          | 4.90          | 4.90          | 0             | <b>14.16</b>    |
| 049                       | 31.05         | 13.07         | 13.62         | 8.72          | <b>66.45</b>    |
| <b>ME - MAINE - Total</b> | <b>353.18</b> | <b>334.87</b> | <b>317.01</b> | <b>308.29</b> | <b>1,313.35</b> |

**STATE: MI - MICHIGAN**

| REGISTRANT ZIP CODE 3 | 1ST QUARTER | 2ND QUARTER | 3RD QUARTER | 4TH QUARTER | TOTAL GRAMS     |
|-----------------------|-------------|-------------|-------------|-------------|-----------------|
| 480                   | 349.69      | 286.51      | 236.39      | 243.48      | <b>1,116.06</b> |
| 481                   | 370.93      | 344.24      | 206.65      | 186.28      | <b>1,108.11</b> |
| 482                   | 32.68       | 71.90       | 39.22       | 44.66       | <b>188.46</b>   |
| 483                   | 100.11      | 82.79       | 58.83       | 73.53       | <b>315.27</b>   |
| 484                   | 77.35       | 133.45      | 124.19      | 131.81      | <b>466.80</b>   |
| 485                   | 43.58       | 32.68       | 42.49       | 52.29       | <b>171.03</b>   |
| 486                   | 330.06      | 391.09      | 184.65      | 219.51      | <b>1,125.30</b> |
| 487                   | 218.96      | 9.80        | 13.62       | 20.15       | <b>262.54</b>   |
| 488                   | 221.80      | 265.81      | 174.30      | 208.07      | <b>869.97</b>   |
| 489                   | 76.80       | 43.58       | 60.46       | 126.37      | <b>307.20</b>   |
| 490                   | 170.49      | 230.40      | 136.72      | 148.16      | <b>685.76</b>   |

|                              |                 |                 |                 |                 |                 |
|------------------------------|-----------------|-----------------|-----------------|-----------------|-----------------|
| 491                          | 4.36            | 0               | 0               | 1.09            | 5.45            |
| 492                          | 139.55          | 96.95           | 92.60           | 131.81          | 460.91          |
| 493                          | 130.73          | 93.69           | 43.58           | 97.50           | 365.49          |
| 494                          | 69.07           | 53.92           | 49.02           | 69.72           | 241.73          |
| 495                          | 123.64          | 70.81           | 72.44           | 23.97           | 290.86          |
| 496                          | 71.90           | 57.74           | 54.47           | 47.39           | 231.49          |
| 497                          | 181.93          | 173.21          | 155.78          | 206.44          | 717.35          |
| 498                          | 139.22          | 73.53           | 57.41           | 21.79           | 291.95          |
| 499                          | 37.04           | 32.68           | 35.95           | 33.23           | 138.90          |
| <b>MI - MICHIGAN - Total</b> | <b>2,889.87</b> | <b>2,544.78</b> | <b>1,838.76</b> | <b>2,087.24</b> | <b>9,360.65</b> |

**STATE: MN - MINNESOTA**

| REGISTRANT ZIP CODE 3         | 1ST QUARTER   | 2ND QUARTER   | 3RD QUARTER   | 4TH QUARTER   | TOTAL GRAMS     |
|-------------------------------|---------------|---------------|---------------|---------------|-----------------|
| 550                           | 83.34         | 78.44         | 59.92         | 31.05         | 252.74          |
| 551                           | 20.70         | 15.80         | 42.49         | 26.69         | 105.67          |
| 553                           | 68.09         | 65.91         | 46.84         | 58.83         | 239.66          |
| 554                           | 79.96         | 155.78        | 43.03         | 84.43         | 363.20          |
| 556                           | 4.36          | 4.36          | 4.36          | 4.36          | 17.43           |
| 557                           | 40.42         | 56.65         | 35.40         | 41.40         | 173.86          |
| 558                           | 67.00         | 40.31         | 38.67         | 17.97         | 163.95          |
| 559                           | 56.10         | 67.54         | 22.33         | 28.32         | 174.30          |
| 560                           | 26.69         | 27.78         | 13.07         | 8.17          | 75.71           |
| 561                           | 1.09          | 1.09          | 4.90          | 0             | 7.08            |
| 562                           | 11.98         | 33.77         | 23.42         | 23.97         | 93.14           |
| 563                           | 49.57         | 59.92         | 31.59         | 65.36         | 206.44          |
| 564                           | 40.57         | 33.44         | 5.45          | 4.90          | 84.36           |
| 565                           | 11.98         | 8.72          | 24.51         | 13.07         | 58.28           |
| 566                           | 7.08          | 1.09          | 9.26          | 20.15         | 37.58           |
| 567                           | 17.43         | 31.05         | 18.52         | 31.05         | 98.04           |
| <b>MN - MINNESOTA - Total</b> | <b>586.35</b> | <b>681.62</b> | <b>423.77</b> | <b>459.72</b> | <b>2,151.45</b> |

**STATE: MO - MISSOURI**

| REGISTRANT ZIP CODE 3 | 1ST QUARTER | 2ND QUARTER | 3RD QUARTER | 4TH QUARTER | TOTAL GRAMS |
|-----------------------|-------------|-------------|-------------|-------------|-------------|
| 630                   | 288.14      | 205.89      | 114.38      | 165.59      | 774.00      |
| 631                   | 541.42      | 553.95      | 364.94      | 450.46      | 1,910.76    |
| 633                   | 64.27       | 77.35       | 62.64       | 25.60       | 229.86      |
| 634                   | 40.85       | 21.79       | 28.32       | 18.52       | 109.48      |
| 635                   | 46.84       | 44.12       | 37.58       | 42.49       | 171.03      |
| 636                   | 53.92       | 48.48       | 34.86       | 61.55       | 198.81      |
| 637                   | 35.95       | 35.95       | 40.85       | 15.80       | 128.55      |
| 638                   | 84.43       | 76.26       | 39.22       | 39.76       | 239.66      |
| 639                   | 41.94       | 59.92       | 57.19       | 67.54       | 226.59      |

|                              |                 |                 |                 |                 |                  |
|------------------------------|-----------------|-----------------|-----------------|-----------------|------------------|
| 640                          | 312.11          | 193.91          | 251.65          | 239.12          | 996.78           |
| 641                          | 203.71          | 326.27          | 204.26          | 166.67          | 900.91           |
| 644                          | 44.12           | 19.06           | 31.59           | 15.25           | 110.03           |
| 645                          | 53.92           | 29.96           | 11.98           | 34.86           | 130.73           |
| 646                          | 7.63            | 10.89           | 28.32           | 7.63            | 54.47            |
| 647                          | 53.38           | 40.31           | 33.23           | 49.02           | 175.93           |
| 648                          | 141.62          | 109.48          | 98.59           | 85.52           | 435.21           |
| 650                          | 32.14           | 65.36           | 32.14           | 36.49           | 166.13           |
| 651                          | 77.35           | 89.87           | 55.01           | 73.53           | 295.77           |
| 652                          | 366.03          | 285.42          | 241.84          | 205.35          | 1,098.63         |
| 653                          | 104.80          | 79.74           | 83.88           | 83.88           | 352.30           |
| 654                          | 52.29           | 70.81           | 66.45           | 56.65           | 246.20           |
| 655                          | 190.64          | 157.96          | 102.40          | 117.65          | 568.65           |
| 656                          | 92.60           | 43.58           | 70.81           | 68.63           | 275.61           |
| 657                          | 245.65          | 202.62          | 205.89          | 178.11          | 832.28           |
| 658                          | 113.30          | 245.65          | 183.56          | 143.80          | 686.31           |
| <b>MO - MISSOURI - Total</b> | <b>3,289.04</b> | <b>3,094.59</b> | <b>2,481.60</b> | <b>2,449.46</b> | <b>11,314.68</b> |

## STATE: MS - MISSISSIPPI

| REGISTRANT ZIP CODE 3           | 1ST QUARTER     | 2ND QUARTER     | 3RD QUARTER     | 4TH QUARTER     | TOTAL GRAMS      |
|---------------------------------|-----------------|-----------------|-----------------|-----------------|------------------|
| 386                             | 480.96          | 419.41          | 436.29          | 299.58          | 1,636.24         |
| 387                             | 256.46          | 339.25          | 231.71          | 173.76          | 1,001.18         |
| 388                             | 314.72          | 245.35          | 203.71          | 183.56          | 947.34           |
| 389                             | 186.09          | 189.55          | 117.00          | 165.04          | 657.68           |
| 390                             | 236.07          | 216.79          | 155.78          | 159.59          | 768.23           |
| 391                             | 273.43          | 286.51          | 259.82          | 105.67          | 925.42           |
| 392                             | 333.35          | 293.04          | 314.83          | 261.99          | 1,203.21         |
| 393                             | 394.35          | 509.81          | 317.55          | 251.65          | 1,473.36         |
| 394                             | 323.83          | 487.91          | 379.65          | 340.97          | 1,532.36         |
| 395                             | 826.75          | 525.51          | 567.02          | 535.43          | 2,454.71         |
| 396                             | 101.31          | 75.71           | 78.44           | 45.21           | 300.67           |
| 397                             | 200.21          | 126.48          | 144.30          | 91.51           | 562.49           |
| <b>MS - MISSISSIPPI - Total</b> | <b>3,927.52</b> | <b>3,715.31</b> | <b>3,206.10</b> | <b>2,613.96</b> | <b>13,462.89</b> |

## STATE: MT - MONTANA

| REGISTRANT ZIP CODE 3 | 1ST QUARTER | 2ND QUARTER | 3RD QUARTER | 4TH QUARTER | TOTAL GRAMS |
|-----------------------|-------------|-------------|-------------|-------------|-------------|
| 590                   | 20.26       | 9.80        | 22.88       | 6.54        | 59.48       |
| 591                   | 113.62      | 79.52       | 41.40       | 52.29       | 286.83      |
| 592                   | 27.78       | 14.71       | 21.79       | 14.16       | 78.44       |
| 593                   | 4.36        | 34.86       | 16.34       | 17.43       | 72.99       |
| 594                   | 168.85      | 89.33       | 95.87       | 62.09       | 416.14      |
| 595                   | 8.72        | 7.63        | 13.07       | 19.61       | 49.02       |

|                             |               |               |               |               |                 |
|-----------------------------|---------------|---------------|---------------|---------------|-----------------|
| 596                         | 80.61         | 89.33         | 81.70         | 26.15         | 277.79          |
| 597                         | 41.40         | 45.21         | 45.75         | 25.06         | 157.41          |
| 598                         | 81.16         | 100.22        | 72.44         | 61.01         | 314.83          |
| 599                         | 97.50         | 106.21        | 76.80         | 40.85         | 321.37          |
| <b>MT - MONTANA - Total</b> | <b>644.26</b> | <b>576.82</b> | <b>488.04</b> | <b>325.18</b> | <b>2,034.30</b> |

**STATE: NC - NORTH CAROLINA**

| REGISTRANT ZIP CODE 3              | 1ST QUARTER     | 2ND QUARTER     | 3RD QUARTER     | 4TH QUARTER     | TOTAL GRAMS      |
|------------------------------------|-----------------|-----------------|-----------------|-----------------|------------------|
| 270                                | 123.10          | 124.73          | 113.30          | 116.56          | 477.69           |
| 271                                | 166.67          | 142.71          | 83.88           | 70.26           | 463.53           |
| 272                                | 334.44          | 263.08          | 247.83          | 226.05          | 1,071.40         |
| 273                                | 191.73          | 135.08          | 100.77          | 128.55          | 556.13           |
| 274                                | 130.73          | 123.64          | 80.61           | 82.79           | 417.78           |
| 275                                | 419.95          | 451.55          | 478.78          | 289.23          | 1,639.51         |
| 276                                | 147.61          | 183.02          | 216.24          | 169.94          | 716.81           |
| 277                                | 21.79           | 25.06           | 40.31           | 16.34           | 103.49           |
| 278                                | 291.52          | 366.03          | 324.63          | 287.60          | 1,269.78         |
| 279                                | 237.48          | 228.22          | 203.71          | 200.45          | 869.87           |
| 280                                | 438.58          | 388.36          | 325.18          | 311.02          | 1,463.14         |
| 281                                | 478.24          | 398.17          | 388.36          | 413.42          | 1,678.18         |
| 282                                | 395.12          | 408.52          | 163.95          | 183.56          | 1,151.14         |
| 283                                | 337.60          | 290.32          | 301.21          | 245.65          | 1,174.78         |
| 284                                | 202.51          | 228.22          | 148.70          | 223.87          | 803.31           |
| 285                                | 274.52          | 232.04          | 188.46          | 189.01          | 884.03           |
| 286                                | 551.44          | 563.21          | 428.67          | 345.88          | 1,889.19         |
| 287                                | 279.97          | 214.61          | 265.26          | 234.22          | 994.05           |
| 288                                | 13.07           | 27.23           | 43.03           | 9.80            | 93.14            |
| 289                                | 9.80            | 16.34           | 4.36            | 8.72            | 39.22            |
| <b>NC - NORTH CAROLINA - Total</b> | <b>5,045.88</b> | <b>4,810.14</b> | <b>4,147.25</b> | <b>3,752.90</b> | <b>17,756.16</b> |

**STATE: ND - NORTH DAKOTA**

| REGISTRANT ZIP CODE 3            | 1ST QUARTER   | 2ND QUARTER   | 3RD QUARTER   | 4TH QUARTER   | TOTAL GRAMS   |
|----------------------------------|---------------|---------------|---------------|---------------|---------------|
| 580                              | 4.36          | 5.45          | 20.15         | 26.15         | 56.10         |
| 581                              | 35.40         | 31.05         | 20.70         | 7.63          | 94.78         |
| 582                              | 14.71         | 8.72          | 27.78         | 9.80          | 61.01         |
| 583                              | 28.32         | 25.60         | 33.77         | 19.06         | 106.76        |
| 584                              | 5.66          | 11.44         | 5.99          | 15.25         | 38.35         |
| 585                              | 40.52         | 50.11         | 72.44         | 68.63         | 231.71        |
| 586                              | 13.73         | 9.80          | 5.45          | 4.36          | 33.33         |
| 587                              | 35.95         | 8.72          | 29.41         | 34.32         | 108.39        |
| 588                              | 1.31          | 9.80          | 4.36          | 7.08          | 22.55         |
| <b>ND - NORTH DAKOTA - Total</b> | <b>179.96</b> | <b>160.68</b> | <b>220.05</b> | <b>192.27</b> | <b>752.98</b> |

**STATE: NE - NEBRASKA**

| REGISTRANT ZIP CODE 3        | 1ST QUARTER   | 2ND QUARTER   | 3RD QUARTER   | 4TH QUARTER   | TOTAL GRAMS     |
|------------------------------|---------------|---------------|---------------|---------------|-----------------|
| 680                          | 43.03         | 64.27         | 57.19         | 44.12         | 208.62          |
| 681                          | 244.02        | 107.85        | 102.95        | 140.53        | 595.34          |
| 683                          | 2.72          | 5.45          | 3.27          | 7.08          | 18.52           |
| 684                          | 7.63          | 2.18          | 3.27          | 26.15         | 39.22           |
| 685                          | 83.75         | 56.10         | 72.99         | 27.78         | 240.62          |
| 686                          | 7.63          | 11.44         | 11.98         | 8.72          | 39.76           |
| 687                          | 17.97         | 50.66         | 19.61         | 26.69         | 114.93          |
| 688                          | 60.46         | 52.83         | 52.29         | 29.41         | 195.00          |
| 689                          | 47.28         | 76.26         | 52.83         | 59.92         | 236.29          |
| 690                          | 11.33         | 11.44         | 9.80          | 4.36          | 36.93           |
| 691                          | 27.23         | 14.71         | 35.40         | 26.69         | 104.04          |
| 692                          | 14.16         | 10.89         | 8.17          | 10.89         | 44.12           |
| 693                          | 29.41         | 10.89         | 9.26          | 13.62         | 63.18           |
| <b>NE - NEBRASKA - Total</b> | <b>596.63</b> | <b>474.97</b> | <b>439.02</b> | <b>425.95</b> | <b>1,936.56</b> |

**STATE: NH - NEW HAMPSHIRE**

| REGISTRANT ZIP CODE 3             | 1ST QUARTER   | 2ND QUARTER   | 3RD QUARTER   | 4TH QUARTER   | TOTAL GRAMS     |
|-----------------------------------|---------------|---------------|---------------|---------------|-----------------|
| 030                               | 46.84         | 91.51         | 28.87         | 58.83         | 226.05          |
| 031                               | 59.70         | 49.24         | 63.18         | 52.29         | 224.41          |
| 032                               | 108.83        | 88.24         | 67.54         | 73.53         | 338.14          |
| 033                               | 217.88        | 187.37        | 164.50        | 180.84        | 750.58          |
| 034                               | 28.32         | 31.59         | 25.06         | 15.25         | 100.22          |
| 035                               | 5.45          | 12.53         | 1.09          | 4.36          | 23.42           |
| 037                               | 26.15         | 17.43         | 29.41         | 21.79         | 94.78           |
| 038                               | 151.42        | 95.87         | 94.23         | 89.87         | 431.39          |
| <b>NH - NEW HAMPSHIRE - Total</b> | <b>644.58</b> | <b>573.77</b> | <b>473.88</b> | <b>496.76</b> | <b>2,188.99</b> |

**STATE: NJ - NEW JERSEY**

| REGISTRANT ZIP CODE 3 | 1ST QUARTER | 2ND QUARTER | 3RD QUARTER | 4TH QUARTER | TOTAL GRAMS |
|-----------------------|-------------|-------------|-------------|-------------|-------------|
| 070                   | 258.51      | 204.26      | 248.38      | 186.83      | 897.97      |
| 071                   | 8.72        | 21.24       | 5.99        | 9.26        | 45.21       |
| 072                   | 3.27        | 1.09        | 1.09        | 43.58       | 49.02       |
| 073                   | 38.67       | 49.57       | 31.59       | 0           | 119.83      |
| 074                   | 55.23       | 62.64       | 33.77       | 28.32       | 179.96      |
| 075                   | 80.29       | 26.15       | 14.16       | 23.42       | 144.02      |
| 076                   | 106.21      | 139.55      | 135.08      | 177.57      | 558.41      |
| 077                   | 197.61      | 214.06      | 230.40      | 124.19      | 766.27      |
| 078                   | 77.89       | 89.33       | 81.16       | 51.75       | 300.12      |
| 079                   | 76.26       | 47.93       | 60.46       | 47.39       | 232.04      |
| 080                   | 281.93      | 211.34      | 147.07      | 110.57      | 750.91      |

|                                |                 |                 |                 |                 |                 |
|--------------------------------|-----------------|-----------------|-----------------|-----------------|-----------------|
| 081                            | 10.89           | 4.90            | 17.43           | 4.90            | <b>38.13</b>    |
| 082                            | 23.97           | 74.08           | 33.77           | 47.39           | <b>179.20</b>   |
| 083                            | 13.07           | 13.62           | 7.08            | 5.99            | <b>39.76</b>    |
| 084                            | 0               | 0               | 4.36            | 1.63            | <b>5.99</b>     |
| 085                            | 52.29           | 37.04           | 51.20           | 26.15           | <b>166.67</b>   |
| 086                            | 30.50           | 24.51           | 29.41           | 13.07           | <b>97.50</b>    |
| 087                            | 51.64           | 62.09           | 86.61           | 28.32           | <b>228.66</b>   |
| 088                            | 414.40          | 328.45          | 262.54          | 358.40          | <b>1,363.79</b> |
| 089                            | 14.16           | 43.03           | 13.62           | 35.95           | <b>106.76</b>   |
| <b>NJ - NEW JERSEY - Total</b> | <b>1,795.51</b> | <b>1,654.87</b> | <b>1,495.17</b> | <b>1,324.68</b> | <b>6,270.22</b> |

**STATE: NM - NEW MEXICO**

| REGISTRANT ZIP CODE 3          | 1ST QUARTER     | 2ND QUARTER     | 3RD QUARTER     | 4TH QUARTER   | TOTAL GRAMS     |
|--------------------------------|-----------------|-----------------|-----------------|---------------|-----------------|
| 870                            | 117.65          | 137.26          | 63.18           | 68.63         | <b>386.73</b>   |
| 871                            | 686.85          | 570.29          | 514.73          | 401.98        | <b>2,173.85</b> |
| 873                            | 0.54            | 1.09            | 9.80            | 4.36          | <b>15.80</b>    |
| 874                            | 13.62           | 37.04           | 26.15           | 13.07         | <b>89.87</b>    |
| 875                            | 171.03          | 166.13          | 161.23          | 68.63         | <b>567.02</b>   |
| 877                            | 33.23           | 20.15           | 32.68           | 19.61         | <b>105.67</b>   |
| 878                            | 8.72            | 0               | 17.43           | 0             | <b>26.15</b>    |
| 879                            | 0               | 6.54            | 21.79           | 8.72          | <b>37.04</b>    |
| 880                            | 355.90          | 276.70          | 164.50          | 110.57        | <b>907.67</b>   |
| 881                            | 73.53           | 85.52           | 95.32           | 31.05         | <b>285.42</b>   |
| 882                            | 143.80          | 152.51          | 76.80           | 60.46         | <b>433.57</b>   |
| 883                            | 2.72            | 30.50           | 14.16           | 13.62         | <b>61.01</b>    |
| 884                            | 0               | 1.09            | 0               | 4.36          | <b>5.45</b>     |
| <b>NM - NEW MEXICO - Total</b> | <b>1,607.59</b> | <b>1,484.82</b> | <b>1,197.77</b> | <b>805.05</b> | <b>5,095.22</b> |

**STATE: NV - NEVADA**

| REGISTRANT ZIP CODE 3      | 1ST QUARTER     | 2ND QUARTER     | 3RD QUARTER     | 4TH QUARTER   | TOTAL GRAMS     |
|----------------------------|-----------------|-----------------|-----------------|---------------|-----------------|
| 890                        | 317.55          | 225.50          | 168.85          | 200.45        | <b>912.35</b>   |
| 891                        | 1,050.27        | 876.40          | 715.72          | 602.97        | <b>3,245.36</b> |
| 893                        | 6.54            | 11.98           | 2.18            | 2.18          | <b>22.88</b>    |
| 894                        | 88.24           | 38.13           | 28.32           | 28.32         | <b>183.02</b>   |
| 895                        | 181.93          | 131.27          | 90.96           | 97.50         | <b>501.66</b>   |
| 897                        | 45.75           | 77.35           | 31.59           | 16.34         | <b>171.03</b>   |
| 898                        | 14.71           | 31.59           | 17.97           | 12.53         | <b>76.80</b>    |
| <b>NV - NEVADA - Total</b> | <b>1,704.98</b> | <b>1,392.22</b> | <b>1,055.60</b> | <b>960.28</b> | <b>5,113.09</b> |

**STATE: NY - NEW YORK**

| REGISTRANT ZIP CODE 3 | 1ST QUARTER | 2ND QUARTER | 3RD QUARTER | 4TH QUARTER | TOTAL GRAMS     |
|-----------------------|-------------|-------------|-------------|-------------|-----------------|
| 100                   | 677.92      | 615.50      | 464.62      | 272.89      | <b>2,030.92</b> |
| 101                   | 38.13       | 55.56       | 32.68       | 74.08       | <b>200.45</b>   |

ARCOS 3 - REPORT 01 by GRAMS  
RETAIL DRUG DISTRIBUTION BY ZIP CODE WITHIN STATE

|     |        |        |        |        |                 |
|-----|--------|--------|--------|--------|-----------------|
| 103 | 120.48 | 177.57 | 40.31  | 114.38 | <b>452.74</b>   |
| 104 | 108.94 | 116.02 | 168.85 | 69.72  | <b>463.53</b>   |
| 105 | 131.27 | 178.66 | 159.05 | 100.77 | <b>569.74</b>   |
| 106 | 18.52  | 5.45   | 14.71  | 4.36   | <b>43.03</b>    |
| 107 | 32.14  | 71.90  | 50.11  | 46.84  | <b>200.99</b>   |
| 108 | 5.66   | 28.87  | 11.44  | 9.80   | <b>55.78</b>    |
| 109 | 43.03  | 56.10  | 81.70  | 117.65 | <b>298.49</b>   |
| 110 | 64.82  | 138.35 | 87.15  | 67.54  | <b>357.86</b>   |
| 111 | 0      | 2.18   | 3.81   | 4.90   | <b>10.89</b>    |
| 112 | 294.68 | 105.67 | 135.63 | 116.02 | <b>651.99</b>   |
| 113 | 72.99  | 93.69  | 93.14  | 114.93 | <b>374.75</b>   |
| 114 | 51.20  | 38.13  | 27.23  | 38.67  | <b>155.24</b>   |
| 115 | 140.75 | 145.43 | 210.79 | 239.66 | <b>736.64</b>   |
| 117 | 147.61 | 193.36 | 161.23 | 106.76 | <b>608.96</b>   |
| 118 | 69.72  | 44.12  | 78.44  | 61.55  | <b>253.82</b>   |
| 119 | 3.81   | 19.61  | 10.89  | 5.99   | <b>40.31</b>    |
| 120 | 79.31  | 75.17  | 52.29  | 91.51  | <b>298.27</b>   |
| 121 | 48.48  | 91.51  | 105.12 | 23.97  | <b>269.08</b>   |
| 122 | 57.74  | 22.33  | 27.23  | 16.89  | <b>124.19</b>   |
| 123 | 89.87  | 136.72 | 87.15  | 79.52  | <b>393.26</b>   |
| 124 | 78.44  | 56.65  | 66.45  | 87.15  | <b>288.68</b>   |
| 125 | 51.20  | 51.20  | 20.70  | 77.89  | <b>200.99</b>   |
| 126 | 50.66  | 45.21  | 103.49 | 9.80   | <b>209.16</b>   |
| 127 | 16.89  | 18.52  | 30.50  | 13.62  | <b>79.52</b>    |
| 128 | 119.50 | 57.74  | 130.18 | 117.11 | <b>424.53</b>   |
| 129 | 39.65  | 96.95  | 23.97  | 35.40  | <b>195.98</b>   |
| 130 | 219.51 | 271.78 | 221.14 | 175.39 | <b>887.82</b>   |
| 131 | 40.31  | 44.66  | 53.92  | 9.80   | <b>148.70</b>   |
| 132 | 55.01  | 59.37  | 67.00  | 61.55  | <b>242.93</b>   |
| 133 | 59.89  | 43.84  | 32.38  | 53.38  | <b>189.49</b>   |
| 134 | 32.35  | 23.09  | 18.52  | 44.12  | <b>118.09</b>   |
| 135 | 9.26   | 28.32  | 14.71  | 13.62  | <b>65.91</b>    |
| 136 | 9.80   | 10.35  | 8.17   | 14.16  | <b>42.49</b>    |
| 137 | 17.43  | 2.18   | 4.36   | 3.27   | <b>27.23</b>    |
| 138 | 67.54  | 74.62  | 26.15  | 23.97  | <b>192.27</b>   |
| 139 | 13.07  | 3.27   | 3.27   | 19.61  | <b>39.22</b>    |
| 140 | 52.29  | 62.09  | 49.02  | 35.95  | <b>199.36</b>   |
| 141 | 71.90  | 78.44  | 34.86  | 39.22  | <b>224.41</b>   |
| 142 | 977.13 | 349.69 | 81.70  | 147.07 | <b>1,555.58</b> |
| 143 | 61.01  | 86.06  | 86.06  | 54.47  | <b>287.60</b>   |

|                              |                 |                 |                 |                 |                  |
|------------------------------|-----------------|-----------------|-----------------|-----------------|------------------|
| 144                          | 16.34           | 20.70           | 22.88           | 8.17            | 68.09            |
| 145                          | 49.57           | 76.80           | 24.51           | 23.97           | 174.84           |
| 146                          | 137.26          | 105.12          | 144.89          | 68.09           | 455.36           |
| 147                          | 45.75           | 61.01           | 40.31           | 22.88           | 169.94           |
| 148                          | 196.09          | 138.35          | 99.13           | 110.57          | 544.14           |
| 149                          | 43.03           | 25.60           | 20.70           | 10.89           | 100.22           |
| <b>NY - NEW YORK - Total</b> | <b>4,827.94</b> | <b>4,303.49</b> | <b>3,532.54</b> | <b>3,059.51</b> | <b>15,723.47</b> |

**STATE: OH - OHIO**

| REGISTRANT ZIP CODE 3    | 1ST QUARTER     | 2ND QUARTER     | 3RD QUARTER     | 4TH QUARTER     | TOTAL GRAMS      |
|--------------------------|-----------------|-----------------|-----------------|-----------------|------------------|
| 430                      | 203.71          | 139.44          | 101.86          | 101.31          | 546.32           |
| 431                      | 267.44          | 115.47          | 138.35          | 185.19          | 706.46           |
| 432                      | 674.65          | 324.63          | 154.69          | 190.64          | 1,344.62         |
| 433                      | 50.11           | 10.89           | 4.36            | 10.89           | 76.26            |
| 434                      | 132.90          | 56.65           | 58.83           | 71.90           | 320.28           |
| 435                      | 49.02           | 80.61           | 36.49           | 54.47           | 220.60           |
| 436                      | 91.51           | 46.84           | 57.85           | 48.48           | 244.67           |
| 437                      | 250.01          | 393.26          | 102.40          | 137.81          | 883.48           |
| 439                      | 99.68           | 91.51           | 62.09           | 28.87           | 282.15           |
| 440                      | 205.46          | 233.13          | 286.51          | 197.72          | 922.81           |
| 441                      | 927.82          | 774.00          | 574.10          | 729.34          | 3,005.26         |
| 442                      | 103.27          | 57.74           | 47.93           | 57.74           | 266.68           |
| 443                      | 73.53           | 51.20           | 34.86           | 23.42           | 183.02           |
| 444                      | 44.66           | 80.61           | 40.31           | 45.21           | 210.79           |
| 445                      | 49.78           | 55.01           | 62.09           | 46.30           | 213.19           |
| 446                      | 89.05           | 81.70           | 56.65           | 64.27           | 291.67           |
| 447                      | 43.47           | 38.13           | 52.29           | 33.77           | 167.65           |
| 448                      | 221.40          | 140.53          | 163.12          | 131.27          | 656.33           |
| 449                      | 87.15           | 64.82           | 14.71           | 20.70           | 187.37           |
| 450                      | 254.37          | 150.33          | 124.19          | 112.21          | 641.10           |
| 451                      | 93.14           | 66.45           | 128.00          | 57.19           | 344.79           |
| 452                      | 890.24          | 683.02          | 544.83          | 636.74          | 2,754.83         |
| 453                      | 109.70          | 153.06          | 122.01          | 106.76          | 491.53           |
| 454                      | 293.91          | 170.16          | 201.32          | 178.44          | 843.83           |
| 455                      | 17.43           | 13.07           | 21.79           | 68.63           | 120.92           |
| 456                      | 43.58           | 42.49           | 14.71           | 10.35           | 111.12           |
| 457                      | 11.98           | 40.85           | 11.44           | 9.80            | 74.08            |
| 458                      | 139.44          | 149.79          | 115.47          | 78.44           | 483.14           |
| <b>OH - OHIO - Total</b> | <b>5,518.43</b> | <b>4,305.41</b> | <b>3,333.24</b> | <b>3,437.85</b> | <b>16,594.92</b> |

**STATE: OK - OKLAHOMA**

| REGISTRANT ZIP CODE 3 | 1ST QUARTER | 2ND QUARTER | 3RD QUARTER | 4TH QUARTER | TOTAL GRAMS |
|-----------------------|-------------|-------------|-------------|-------------|-------------|
|-----------------------|-------------|-------------|-------------|-------------|-------------|



|                              |                 |                 |                 |                 |                  |
|------------------------------|-----------------|-----------------|-----------------|-----------------|------------------|
| 730                          | 1,060.51        | 892.74          | 872.59          | 646.54          | 3,472.38         |
| 731                          | 1,779.49        | 1,606.68        | 1,581.23        | 1,130.23        | 6,097.62         |
| 734                          | 41.29           | 33.23           | 38.13           | 40.85           | 153.49           |
| 735                          | 614.08          | 491.31          | 471.37          | 339.89          | 1,916.65         |
| 736                          | 58.83           | 49.02           | 63.18           | 33.77           | 204.80           |
| 737                          | 86.87           | 87.96           | 92.60           | 77.89           | 345.31           |
| 738                          | 17.97           | 4.90            | 8.17            | 15.25           | 46.30            |
| 739                          | 32.68           | 20.70           | 20.15           | 13.07           | 86.61            |
| 740                          | 1,070.31        | 792.52          | 673.23          | 483.68          | 3,019.75         |
| 741                          | 671.06          | 614.41          | 516.91          | 399.80          | 2,202.17         |
| 743                          | 123.10          | 129.64          | 114.93          | 94.78           | 462.44           |
| 744                          | 464.62          | 302.85          | 266.35          | 136.17          | 1,169.99         |
| 745                          | 65.91           | 81.70           | 76.80           | 30.50           | 254.91           |
| 746                          | 29.41           | 42.49           | 17.43           | 16.89           | 106.21           |
| 747                          | 153.60          | 118.20          | 145.98          | 96.95           | 514.73           |
| 748                          | 330.08          | 189.01          | 177.02          | 192.27          | 888.39           |
| 749                          | 152.47          | 90.94           | 41.94           | 46.84           | 332.19           |
| <b>OK - OKLAHOMA - Total</b> | <b>6,752.27</b> | <b>5,548.27</b> | <b>5,178.02</b> | <b>3,795.38</b> | <b>21,273.95</b> |

**STATE: OR - OREGON**

| REGISTRANT ZIP CODE 3      | 1ST QUARTER     | 2ND QUARTER     | 3RD QUARTER     | 4TH QUARTER   | TOTAL GRAMS     |
|----------------------------|-----------------|-----------------|-----------------|---------------|-----------------|
| 970                        | 128.66          | 148.70          | 132.36          | 40.31         | 450.02          |
| 971                        | 148.92          | 138.35          | 102.40          | 94.23         | 483.90          |
| 972                        | 265.26          | 339.34          | 318.10          | 214.06        | 1,136.76        |
| 973                        | 193.91          | 149.79          | 173.21          | 104.04        | 620.94          |
| 974                        | 110.24          | 206.11          | 169.40          | 177.02        | 662.78          |
| 975                        | 211.99          | 142.71          | 153.60          | 107.85        | 616.15          |
| 976                        | 29.20           | 20.70           | 9.26            | 14.71         | 73.86           |
| 977                        | 39.22           | 60.46           | 39.76           | 53.38         | 192.82          |
| 978                        | 69.72           | 79.52           | 60.46           | 65.91         | 275.61          |
| 979                        | 2.72            | 13.62           | 20.70           | 20.70         | 57.74           |
| <b>OR - OREGON - Total</b> | <b>1,199.84</b> | <b>1,299.30</b> | <b>1,179.25</b> | <b>892.20</b> | <b>4,570.58</b> |

**STATE: PA - PENNSYLVANIA**

| REGISTRANT ZIP CODE 3 | 1ST QUARTER | 2ND QUARTER | 3RD QUARTER | 4TH QUARTER | TOTAL GRAMS |
|-----------------------|-------------|-------------|-------------|-------------|-------------|
| 150                   | 91.51       | 67.54       | 55.56       | 76.80       | 291.41      |
| 151                   | 54.36       | 111.12      | 39.22       | 96.41       | 301.10      |
| 152                   | 186.94      | 218.96      | 196.09      | 103.49      | 705.48      |
| 153                   | 38.67       | 52.29       | 35.40       | 0.54        | 126.91      |
| 154                   | 15.47       | 31.59       | 9.26        | 13.07       | 69.39       |
| 155                   | 14.16       | 2.18        | 5.45        | 7.63        | 29.41       |
| 156                   | 54.90       | 50.11       | 32.68       | 29.96       | 167.65      |

|                                  |                 |                 |                 |                 |                  |
|----------------------------------|-----------------|-----------------|-----------------|-----------------|------------------|
| 157                              | 11.44           | 22.33           | 7.63            | 21.24           | 62.64            |
| 158                              | 76.04           | 83.88           | 76.26           | 67.54           | 303.72           |
| 159                              | 65.36           | 50.11           | 60.46           | 46.84           | 222.78           |
| 160                              | 26.15           | 17.43           | 27.23           | 33.77           | 104.58           |
| 161                              | 39.76           | 25.06           | 26.69           | 14.16           | 105.67           |
| 162                              | 5.99            | 9.26            | 0               | 0               | 15.25            |
| 163                              | 35.40           | 19.61           | 41.94           | 23.42           | 120.38           |
| 164                              | 57.19           | 31.05           | 30.50           | 35.40           | 154.15           |
| 165                              | 43.03           | 56.65           | 50.66           | 40.31           | 190.64           |
| 166                              | 67.43           | 50.11           | 40.31           | 18.52           | 176.37           |
| 167                              | 1.09            | 1.09            | 5.45            | 0               | 7.63             |
| 168                              | 34.86           | 28.87           | 44.66           | 9.80            | 118.20           |
| 169                              | 0               | 20.70           | 2.18            | 1.09            | 23.97            |
| 170                              | 128.00          | 175.39          | 145.43          | 118.74          | 567.56           |
| 171                              | 42.49           | 52.83           | 36.49           | 34.86           | 166.67           |
| 172                              | 4.79            | 12.64           | 1.09            | 6.54            | 25.06            |
| 173                              | 198.81          | 160.14          | 121.47          | 165.04          | 645.45           |
| 174                              | 133.99          | 137.26          | 71.90           | 9.80            | 352.96           |
| 175                              | 33.77           | 41.94           | 37.04           | 40.85           | 153.60           |
| 176                              | 37.04           | 54.47           | 32.68           | 17.43           | 141.62           |
| 177                              | 43.58           | 29.96           | 21.79           | 38.13           | 133.45           |
| 178                              | 34.86           | 41.40           | 29.41           | 34.32           | 139.98           |
| 179                              | 8.72            | 23.97           | 0               | 4.90            | 37.58            |
| 180                              | 90.96           | 59.92           | 43.03           | 76.26           | 270.17           |
| 181                              | 108.39          | 89.33           | 98.59           | 72.44           | 368.75           |
| 182                              | 34.86           | 37.58           | 33.77           | 36.49           | 142.71           |
| 183                              | 10.89           | 0.54            | 10.89           | 0               | 22.33            |
| 184                              | 32.68           | 9.80            | 17.43           | 14.16           | 74.08            |
| 185                              | 87.15           | 37.04           | 39.22           | 27.78           | 191.19           |
| 186                              | 34.86           | 13.62           | 9.80            | 17.43           | 75.71            |
| 187                              | 314.07          | 286.51          | 180.29          | 159.05          | 939.91           |
| 188                              | 168.31          | 64.51           | 106.98          | 108.39          | 448.19           |
| 189                              | 26.15           | 38.67           | 11.98           | 13.07           | 89.87            |
| 190                              | 464.18          | 461.90          | 334.98          | 324.63          | 1,585.69         |
| 191                              | 289.12          | 238.03          | 165.59          | 153.60          | 846.34           |
| 193                              | 120.38          | 90.96           | 128.00          | 81.70           | 421.04           |
| 194                              | 90.42           | 62.64           | 94.23           | 98.04           | 345.33           |
| 195                              | 30.50           | 26.15           | 8.72            | 21.79           | 87.15            |
| 196                              | 44.12           | 2.18            | 57.74           | 52.29           | 156.33           |
| <b>PA - PENNSYLVANIA - Total</b> | <b>3,532.84</b> | <b>3,199.30</b> | <b>2,626.16</b> | <b>2,367.76</b> | <b>11,726.05</b> |

**STATE: PR - PUERTO RICO**

| REGISTRANT ZIP CODE 3           | 1ST QUARTER     | 2ND QUARTER     | 3RD QUARTER     | 4TH QUARTER     | TOTAL GRAMS      |
|---------------------------------|-----------------|-----------------|-----------------|-----------------|------------------|
| 006                             | 774.00          | 513.64          | 1,347.01        | 1,229.36        | 3,864.01         |
| 007                             | 473.33          | 491.31          | 1,228.27        | 962.46          | 3,155.37         |
| 009                             | 1,198.86        | 1,219.01        | 1,660.75        | 1,384.60        | 5,463.22         |
| <b>PR - PUERTO RICO - Total</b> | <b>2,446.19</b> | <b>2,223.96</b> | <b>4,236.03</b> | <b>3,576.42</b> | <b>12,482.60</b> |

**STATE: RI - RHODE ISLAND**

| REGISTRANT ZIP CODE 3            | 1ST QUARTER   | 2ND QUARTER   | 3RD QUARTER   | 4TH QUARTER  | TOTAL GRAMS   |
|----------------------------------|---------------|---------------|---------------|--------------|---------------|
| 028                              | 80.07         | 62.64         | 52.83         | 15.25        | 210.79        |
| 029                              | 96.95         | 163.41        | 117.65        | 69.18        | 447.19        |
| <b>RI - RHODE ISLAND - Total</b> | <b>177.02</b> | <b>226.05</b> | <b>170.49</b> | <b>84.43</b> | <b>657.98</b> |

**STATE: SC - SOUTH CAROLINA**

| REGISTRANT ZIP CODE 3              | 1ST QUARTER     | 2ND QUARTER     | 3RD QUARTER     | 4TH QUARTER     | TOTAL GRAMS      |
|------------------------------------|-----------------|-----------------|-----------------|-----------------|------------------|
| 290                                | 595.89          | 489.13          | 472.24          | 313.74          | 1,871.00         |
| 291                                | 585.43          | 437.93          | 320.28          | 409.61          | 1,753.24         |
| 292                                | 739.69          | 604.06          | 546.87          | 406.88          | 2,297.49         |
| 293                                | 275.07          | 267.44          | 293.59          | 196.09          | 1,032.18         |
| 294                                | 851.35          | 830.65          | 652.54          | 745.68          | 3,080.21         |
| 295                                | 537.06          | 532.16          | 460.26          | 384.55          | 1,914.03         |
| 296                                | 883.16          | 782.50          | 784.35          | 592.08          | 3,042.08         |
| 297                                | 196.63          | 150.33          | 139.44          | 77.35           | 563.75           |
| 298                                | 346.42          | 311.56          | 362.76          | 218.96          | 1,239.71         |
| 299                                | 123.64          | 136.17          | 139.44          | 72.99           | 472.24           |
| <b>SC - SOUTH CAROLINA - Total</b> | <b>5,134.33</b> | <b>4,541.93</b> | <b>4,171.76</b> | <b>3,417.91</b> | <b>17,265.94</b> |

**STATE: SD - SOUTH DAKOTA**

| REGISTRANT ZIP CODE 3            | 1ST QUARTER   | 2ND QUARTER   | 3RD QUARTER   | 4TH QUARTER   | TOTAL GRAMS     |
|----------------------------------|---------------|---------------|---------------|---------------|-----------------|
| 570                              | 138.35        | 113.84        | 131.27        | 100.22        | 483.68          |
| 571                              | 166.67        | 233.67        | 118.74        | 62.09         | 581.18          |
| 572                              | 37.58         | 32.68         | 46.84         | 43.03         | 160.14          |
| 573                              | 53.38         | 51.20         | 26.15         | 14.71         | 145.43          |
| 574                              | 27.23         | 14.71         | 15.80         | 25.06         | 82.79           |
| 575                              | 0.54          | 0             | 0             | 8.17          | 8.72            |
| 576                              | 0             | 2.18          | 0             | 1.09          | 3.27            |
| 577                              | 108.07        | 146.52        | 87.69         | 75.71         | 417.99          |
| <b>SD - SOUTH DAKOTA - Total</b> | <b>531.83</b> | <b>594.80</b> | <b>426.49</b> | <b>330.08</b> | <b>1,883.20</b> |

**STATE: TN - TENNESSEE**

| REGISTRANT ZIP CODE 3 | 1ST QUARTER | 2ND QUARTER | 3RD QUARTER | 4TH QUARTER | TOTAL GRAMS |
|-----------------------|-------------|-------------|-------------|-------------|-------------|
| 370                   | 1,118.79    | 931.96      | 817.03      | 477.69      | 3,345.47    |
| 371                   | 1,004.40    | 861.15      | 821.39      | 450.46      | 3,137.40    |
| 372                   | 747.86      | 493.49      | 305.03      | 291.95      | 1,838.32    |

|                               |                 |                 |                 |                 |                  |
|-------------------------------|-----------------|-----------------|-----------------|-----------------|------------------|
| 373                           | 640.49          | 638.09          | 447.19          | 415.60          | 2,141.36         |
| 374                           | 403.07          | 307.20          | 179.20          | 220.60          | 1,110.07         |
| 376                           | 213.52          | 311.56          | 181.93          | 173.76          | 880.76           |
| 377                           | 294.68          | 211.34          | 164.50          | 114.93          | 785.44           |
| 378                           | 318.10          | 275.61          | 164.50          | 169.94          | 928.15           |
| 379                           | 297.38          | 302.30          | 195.54          | 172.12          | 967.34           |
| 380                           | 356.23          | 284.33          | 215.41          | 166.67          | 1,022.64         |
| 381                           | 775.64          | 661.25          | 612.77          | 450.46          | 2,500.12         |
| 382                           | 157.13          | 107.56          | 108.39          | 82.25           | 455.34           |
| 383                           | 455.36          | 391.63          | 333.89          | 264.72          | 1,445.60         |
| 384                           | 257.09          | 227.68          | 209.70          | 142.71          | 837.18           |
| 385                           | 283.78          | 144.34          | 133.99          | 106.21          | 668.33           |
| <b>TN - TENNESSEE - Total</b> | <b>7,323.50</b> | <b>6,149.50</b> | <b>4,890.47</b> | <b>3,700.06</b> | <b>22,063.53</b> |

**STATE: TX - TEXAS**

| REGISTRANT ZIP CODE 3 | 1ST QUARTER | 2ND QUARTER | 3RD QUARTER | 4TH QUARTER | TOTAL GRAMS |
|-----------------------|-------------|-------------|-------------|-------------|-------------|
| 750                   | 786.42      | 782.43      | 588.96      | 563.21      | 2,721.02    |
| 751                   | 241.84      | 168.85      | 100.77      | 92.60       | 604.06      |
| 752                   | 589.90      | 628.13      | 252.74      | 208.07      | 1,678.84    |
| 753                   | 28.87       | 12.64       | 5.45        | 5.45        | 52.40       |
| 754                   | 185.74      | 118.20      | 142.71      | 83.34       | 529.98      |
| 755                   | 67.00       | 98.04       | 75.17       | 67.54       | 307.75      |
| 756                   | 210.40      | 364.96      | 167.11      | 121.70      | 864.18      |
| 757                   | 200.25      | 268.10      | 197.98      | 144.34      | 810.67      |
| 758                   | 10.02       | 18.85       | 11.44       | 14.16       | 54.47       |
| 759                   | 196.35      | 115.47      | 96.41       | 100.22      | 508.45      |
| 760                   | 406.03      | 512.55      | 503.84      | 301.21      | 1,723.63    |
| 761                   | 369.84      | 366.68      | 220.05      | 135.63      | 1,092.21    |
| 762                   | 241.30      | 200.90      | 132.36      | 131.81      | 706.37      |
| 763                   | 61.01       | 271.80      | 97.50       | 56.10       | 486.41      |
| 764                   | 74.08       | 71.83       | 52.83       | 23.97       | 222.71      |
| 765                   | 124.73      | 137.81      | 98.04       | 54.47       | 415.05      |
| 766                   | 25.06       | 14.71       | 21.79       | 33.77       | 95.32       |
| 767                   | 70.81       | 72.44       | 70.81       | 89.87       | 303.94      |
| 768                   | 68.63       | 43.58       | 59.37       | 29.41       | 200.99      |
| 769                   | 91.51       | 92.05       | 104.04      | 88.78       | 376.38      |
| 770                   | 2,474.52    | 1,658.03    | 1,079.03    | 1,933.64    | 7,145.21    |
| 773                   | 585.28      | 398.71      | 340.97      | 324.51      | 1,649.48    |
| 774                   | 334.76      | 212.54      | 181.93      | 159.05      | 888.28      |
| 775                   | 497.84      | 439.56      | 379.10      | 265.26      | 1,581.77    |
| 776                   | 139.98      | 81.16       | 86.71       | 63.18       | 371.04      |

|                           |                  |                  |                 |                 |                  |
|---------------------------|------------------|------------------|-----------------|-----------------|------------------|
| 777                       | 104.04           | 50.66            | 61.01           | 80.07           | 295.77           |
| 778                       | 190.10           | 116.56           | 156.87          | 118.20          | 581.73           |
| 779                       | 49.57            | 26.15            | 30.50           | 66.45           | 172.67           |
| 780                       | 260.91           | 230.40           | 160.68          | 174.30          | 826.29           |
| 781                       | 52.29            | 65.91            | 43.58           | 38.13           | 199.90           |
| 782                       | 950.20           | 916.71           | 677.00          | 510.92          | 3,054.83         |
| 783                       | 32.14            | 6.54             | 31.59           | 15.25           | 85.52            |
| 784                       | 283.24           | 399.26           | 122.55          | 99.13           | 904.18           |
| 785                       | 1,355.18         | 871.22           | 811.58          | 757.66          | 3,795.64         |
| 786                       | 219.62           | 168.85           | 222.78          | 106.76          | 718.01           |
| 787                       | 351.43           | 244.02           | 184.10          | 149.24          | 928.80           |
| 788                       | 89.87            | 269.08           | 77.35           | 84.97           | 521.27           |
| 789                       | 15.58            | 29.96            | 11.98           | 32.68           | 90.20            |
| 790                       | 13.07            | 29.96            | 34.86           | 15.80           | 93.69            |
| 791                       | 83.34            | 55.56            | 58.83           | 53.92           | 251.65           |
| 792                       | 5.45             | 11.44            | 3.81            | 4.90            | 25.60            |
| 793                       | 111.66           | 99.68            | 86.61           | 112.75          | 410.69           |
| 794                       | 298.49           | 174.84           | 147.61          | 120.38          | 741.32           |
| 795                       | 32.14            | 10.89            | 21.24           | 61.01           | 125.28           |
| 796                       | 188.46           | 75.17            | 52.83           | 78.98           | 395.44           |
| 797                       | 549.05           | 370.93           | 342.06          | 287.05          | 1,549.09         |
| 798                       | 0                | 13.07            | 0               | 13.07           | 26.15            |
| 799                       | 218.96           | 227.68           | 126.37          | 107.85          | 680.86           |
| <b>TX - TEXAS - Total</b> | <b>13,536.92</b> | <b>11,614.55</b> | <b>8,532.90</b> | <b>8,180.78</b> | <b>41,865.15</b> |

**STATE: UT - UTAH**

| REGISTRANT ZIP CODE 3    | 1ST QUARTER     | 2ND QUARTER     | 3RD QUARTER     | 4TH QUARTER     | TOTAL GRAMS     |
|--------------------------|-----------------|-----------------|-----------------|-----------------|-----------------|
| 840                      | 691.73          | 729.86          | 477.15          | 497.84          | 2,396.58        |
| 841                      | 398.71          | 392.18          | 324.09          | 236.39          | 1,351.37        |
| 843                      | 46.84           | 47.39           | 38.13           | 38.67           | 171.03          |
| 844                      | 111.66          | 171.03          | 87.15           | 181.38          | 551.22          |
| 845                      | 101.31          | 135.08          | 74.08           | 94.78           | 405.25          |
| 846                      | 173.21          | 147.07          | 175.93          | 125.28          | 621.49          |
| 847                      | 186.83          | 248.38          | 203.17          | 197.72          | 836.10          |
| <b>UT - UTAH - Total</b> | <b>1,710.30</b> | <b>1,870.98</b> | <b>1,379.69</b> | <b>1,372.07</b> | <b>6,333.04</b> |

**STATE: VA - VIRGINIA**

| REGISTRANT ZIP CODE 3 | 1ST QUARTER | 2ND QUARTER | 3RD QUARTER | 4TH QUARTER | TOTAL GRAMS |
|-----------------------|-------------|-------------|-------------|-------------|-------------|
| 201                   | 368.75      | 287.60      | 219.51      | 182.47      | 1,058.33    |
| 220                   | 268.64      | 238.57      | 181.93      | 177.57      | 866.71      |
| 221                   | 98.59       | 166.13      | 112.21      | 161.77      | 538.70      |
| 222                   | 37.04       | 19.61       | 14.16       | 6.54        | 77.35       |

|                              |                 |                 |                 |                 |                  |
|------------------------------|-----------------|-----------------|-----------------|-----------------|------------------|
| 223                          | 185.19          | 101.31          | 197.72          | 172.67          | 656.89           |
| 224                          | 145.43          | 163.41          | 137.81          | 127.46          | 574.10           |
| 225                          | 40.31           | 9.80            | 43.58           | 44.66           | 138.35           |
| 226                          | 144.34          | 162.32          | 149.24          | 150.88          | 606.78           |
| 227                          | 28.32           | 17.43           | 19.61           | 9.80            | 75.17            |
| 228                          | 104.58          | 55.56           | 52.29           | 83.34           | 295.77           |
| 229                          | 293.04          | 313.74          | 248.92          | 183.56          | 1,039.26         |
| 230                          | 240.75          | 141.62          | 82.79           | 108.94          | 574.10           |
| 231                          | 464.07          | 355.14          | 368.21          | 281.06          | 1,468.48         |
| 232                          | 805.59          | 679.23          | 616.04          | 508.19          | 2,609.05         |
| 233                          | 198.81          | 209.16          | 209.16          | 169.94          | 787.07           |
| 234                          | 477.47          | 482.05          | 449.37          | 346.42          | 1,755.31         |
| 235                          | 308.08          | 179.20          | 144.89          | 102.40          | 734.57           |
| 236                          | 289.34          | 299.36          | 184.98          | 130.73          | 904.40           |
| 237                          | 153.82          | 96.52           | 43.03           | 89.33           | 382.70           |
| 238                          | 233.67          | 166.67          | 186.83          | 209.70          | 796.88           |
| 239                          | 69.18           | 99.13           | 46.84           | 86.06           | 301.21           |
| 240                          | 150.66          | 88.24           | 103.49          | 82.79           | 425.18           |
| 241                          | 118.74          | 177.02          | 147.07          | 107.85          | 550.68           |
| 242                          | 261.99          | 147.07          | 137.81          | 144.89          | 691.75           |
| 243                          | 42.49           | 37.04           | 60.46           | 39.76           | 179.75           |
| 244                          | 104.58          | 66.45           | 59.92           | 56.65           | 287.60           |
| 245                          | 78.44           | 148.16          | 81.70           | 107.30          | 415.60           |
| 246                          | 4.90            | 1.09            | 0               | 1.09            | 7.08             |
| <b>VA - VIRGINIA - Total</b> | <b>5,716.82</b> | <b>4,908.61</b> | <b>4,299.55</b> | <b>3,873.82</b> | <b>18,798.80</b> |

**STATE: VI - VIRGIN ISLANDS**

| REGISTRANT ZIP CODE 3              | 1ST QUARTER   | 2ND QUARTER   | 3RD QUARTER   | 4TH QUARTER  | TOTAL GRAMS   |
|------------------------------------|---------------|---------------|---------------|--------------|---------------|
| 008                                | 120.92        | 155.78        | 153.06        | 30.50        | 460.26        |
| <b>VI - VIRGIN ISLANDS - Total</b> | <b>120.92</b> | <b>155.78</b> | <b>153.06</b> | <b>30.50</b> | <b>460.26</b> |

**STATE: VT - VERMONT**

| REGISTRANT ZIP CODE 3       | 1ST QUARTER   | 2ND QUARTER   | 3RD QUARTER   | 4TH QUARTER   | TOTAL GRAMS     |
|-----------------------------|---------------|---------------|---------------|---------------|-----------------|
| 050                         | 6.75          | 0             | 4.36          | 1.09          | 12.20           |
| 051                         | 1.09          | 0             | 1.09          | 0             | 2.18            |
| 053                         | 0             | 0             | 4.36          | 0             | 4.36            |
| 054                         | 229.31        | 254.37        | 128.55        | 182.47        | 794.70          |
| 056                         | 30.50         | 11.44         | 0             | 2.18          | 44.12           |
| 057                         | 82.25         | 33.77         | 38.67         | 36.49         | 191.19          |
| 058                         | 4.36          | 2.18          | 1.09          | 0             | 7.63            |
| <b>VT - VERMONT - Total</b> | <b>354.26</b> | <b>301.76</b> | <b>178.11</b> | <b>222.23</b> | <b>1,056.37</b> |

**STATE: WA - WASHINGTON**

| REGISTRANT ZIP CODE 3          | 1ST QUARTER     | 2ND QUARTER     | 3RD QUARTER     | 4TH QUARTER     | TOTAL GRAMS      |
|--------------------------------|-----------------|-----------------|-----------------|-----------------|------------------|
| 980                            | 544.69          | 574.10          | 452.09          | 452.09          | 2,022.97         |
| 981                            | 424.09          | 347.51          | 224.41          | 210.25          | 1,206.26         |
| 982                            | 484.77          | 701.56          | 495.67          | 391.09          | 2,073.08         |
| 983                            | 290.86          | 323.54          | 324.09          | 253.82          | 1,192.32         |
| 984                            | 146.96          | 144.34          | 115.47          | 107.85          | 514.62           |
| 985                            | 334.44          | 174.84          | 171.58          | 218.96          | 899.82           |
| 986                            | 154.36          | 185.19          | 144.34          | 160.14          | 644.04           |
| 988                            | 167.11          | 181.93          | 78.44           | 112.21          | 539.68           |
| 989                            | 154.15          | 123.10          | 82.25           | 102.40          | 461.90           |
| 990                            | 9.80            | 17.43           | 13.07           | 30.50           | 70.81            |
| 991                            | 88.57           | 116.02          | 115.47          | 67.00           | 387.05           |
| 992                            | 217.88          | 196.09          | 139.98          | 133.65          | 687.60           |
| 993                            | 198.05          | 186.83          | 89.33           | 121.47          | 595.67           |
| 994                            | 43.03           | 17.43           | 32.68           | 17.43           | 110.57           |
| <b>WA - WASHINGTON - Total</b> | <b>3,258.76</b> | <b>3,289.91</b> | <b>2,478.87</b> | <b>2,378.85</b> | <b>11,406.39</b> |

**STATE: WI - WISCONSIN**

| REGISTRANT ZIP CODE 3         | 1ST QUARTER     | 2ND QUARTER     | 3RD QUARTER   | 4TH QUARTER   | TOTAL GRAMS     |
|-------------------------------|-----------------|-----------------|---------------|---------------|-----------------|
| 530                           | 168.31          | 131.27          | 129.09        | 77.89         | 506.56          |
| 531                           | 235.31          | 167.76          | 68.09         | 96.95         | 568.11          |
| 532                           | 119.29          | 195.54          | 63.73         | 58.39         | 436.95          |
| 534                           | 11.98           | 14.71           | 13.07         | 13.07         | 52.83           |
| 535                           | 84.43           | 141.07          | 81.16         | 51.20         | 357.86          |
| 537                           | 69.18           | 97.39           | 61.01         | 47.93         | 275.50          |
| 538                           | 5.45            | 0               | 4.36          | 2.18          | 11.98           |
| 539                           | 30.50           | 12.53           | 12.53         | 3.27          | 58.83           |
| 540                           | 2.18            | 2.18            | 2.18          | 9.80          | 16.34           |
| 541                           | 3.53            | 13.07           | 9.80          | 23.97         | 50.37           |
| 542                           | 49.02           | 33.77           | 46.30         | 42.49         | 171.58          |
| 543                           | 153.60          | 157.96          | 118.20        | 152.51        | 582.27          |
| 544                           | 138.35          | 126.37          | 77.89         | 74.08         | 416.69          |
| 545                           | 4.36            | 7.08            | 0             | 1.63          | 13.07           |
| 546                           | 27.23           | 21.79           | 28.87         | 10.89         | 88.78           |
| 547                           | 29.96           | 21.24           | 41.40         | 17.43         | 110.03          |
| 548                           | 14.92           | 10.35           | 7.63          | 11.44         | 44.34           |
| 549                           | 97.50           | 75.17           | 45.75         | 53.38         | 271.80          |
| <b>WI - WISCONSIN - Total</b> | <b>1,245.09</b> | <b>1,229.25</b> | <b>811.04</b> | <b>748.51</b> | <b>4,033.89</b> |

**STATE: WV - WEST VIRGINIA**

| REGISTRANT ZIP CODE 3 | 1ST QUARTER | 2ND QUARTER | 3RD QUARTER | 4TH QUARTER | TOTAL GRAMS |
|-----------------------|-------------|-------------|-------------|-------------|-------------|
| 247                   | 52.29       | 32.68       | 3.81        | 0           | 88.78       |

|                                   |               |               |               |               |                 |
|-----------------------------------|---------------|---------------|---------------|---------------|-----------------|
| 248                               | 10.89         | 18.52         | 13.07         | 10.89         | 53.38           |
| 249                               | 47.93         | 43.03         | 21.24         | 17.97         | 130.18          |
| 250                               | 1.09          | 4.36          | 0             | 0             | 5.45            |
| 251                               | 6.54          | 17.43         | 1.09          | 0.54          | 25.60           |
| 252                               | 0             | 0             | 4.36          | 0             | 4.36            |
| 253                               | 115.47        | 41.94         | 49.02         | 22.88         | 229.31          |
| 254                               | 52.83         | 51.75         | 26.69         | 21.79         | 153.06          |
| 255                               | 61.01         | 30.50         | 9.80          | 13.07         | 114.38          |
| 256                               | 0             | 17.43         | 0             | 8.72          | 26.15           |
| 257                               | 55.56         | 48.48         | 65.36         | 35.40         | 204.80          |
| 258                               | 22.88         | 6.54          | 15.25         | 8.72          | 53.38           |
| 259                               | 5.99          | 11.98         | 6.54          | 1.09          | 25.60           |
| 260                               | 65.36         | 67.54         | 30.50         | 70.26         | 233.67          |
| 261                               | 78.44         | 85.52         | 65.36         | 40.31         | 269.62          |
| 262                               | 0.54          | 4.36          | 4.36          | 5.45          | 14.71           |
| 263                               | 73.42         | 25.06         | 23.97         | 32.68         | 155.13          |
| 264                               | 3.81          | 3.81          | 3.81          | 1.09          | 12.53           |
| 265                               | 46.84         | 44.12         | 30.50         | 15.25         | 136.72          |
| 266                               | 0             | 4.36          | 4.36          | 0             | 8.72            |
| 267                               | 8.72          | 0             | 5.45          | 8.72          | 22.88           |
| 268                               | 5.45          | 7.63          | 0             | 1.09          | 14.16           |
| <b>WV - WEST VIRGINIA - Total</b> | <b>715.07</b> | <b>567.02</b> | <b>384.55</b> | <b>315.92</b> | <b>1,982.55</b> |

**STATE: WY - WYOMING**

| REGISTRANT ZIP CODE 3       | 1ST QUARTER   | 2ND QUARTER   | 3RD QUARTER   | 4TH QUARTER   | TOTAL GRAMS     |
|-----------------------------|---------------|---------------|---------------|---------------|-----------------|
| 820                         | 58.39         | 28.32         | 39.22         | 33.77         | 159.70          |
| 822                         | 52.29         | 57.19         | 40.31         | 65.36         | 215.15          |
| 823                         | 47.93         | 26.15         | 43.58         | 17.43         | 135.08          |
| 824                         | 33.23         | 21.79         | 28.32         | 16.34         | 99.68           |
| 825                         | 37.04         | 39.22         | 32.14         | 32.14         | 140.53          |
| 826                         | 62.64         | 34.32         | 34.32         | 57.74         | 189.01          |
| 827                         | 11.55         | 20.15         | 13.07         | 13.62         | 58.39           |
| 828                         | 11.44         | 41.40         | 30.50         | 20.15         | 103.49          |
| 829                         | 10.35         | 20.15         | 35.95         | 35.95         | 102.40          |
| 830                         | 3.27          | 1.09          | 1.09          | 2.18          | 7.63            |
| 831                         | 5.45          | 16.89         | 12.53         | 7.63          | 42.49           |
| <b>WY - WYOMING - Total</b> | <b>333.57</b> | <b>306.66</b> | <b>311.02</b> | <b>302.30</b> | <b>1,253.54</b> |

**DRUG: 9250B - METHADONE****STATE: AK - ALASKA**

| REGISTRANT ZIP CODE 3 | 1ST QUARTER | 2ND QUARTER | 3RD QUARTER | 4TH QUARTER | TOTAL GRAMS |
|-----------------------|-------------|-------------|-------------|-------------|-------------|
| 995                   | 5,098.71    | 4,891.56    | 5,683.73    | 3,971.76    | 19,645.76   |



|                            |                 |                 |                 |                 |                  |
|----------------------------|-----------------|-----------------|-----------------|-----------------|------------------|
| 996                        | 2,197.90        | 2,130.10        | 2,394.13        | 2,959.03        | 9,681.16         |
| 997                        | 732.78          | 747.90          | 727.59          | 713.19          | 2,921.47         |
| 998                        | 160.99          | 146.23          | 120.74          | 136.84          | 564.81           |
| 999                        | 48.30           | 38.46           | 38.91           | 44.72           | 170.38           |
| <b>AK - ALASKA - Total</b> | <b>8,238.68</b> | <b>7,954.26</b> | <b>8,965.11</b> | <b>7,825.55</b> | <b>32,983.59</b> |

**STATE: AL - ALABAMA**

| REGISTRANT ZIP CODE 3       | 1ST QUARTER      | 2ND QUARTER      | 3RD QUARTER      | 4TH QUARTER      | TOTAL GRAMS       |
|-----------------------------|------------------|------------------|------------------|------------------|-------------------|
| 350                         | 10,657.22        | 12,842.87        | 10,773.32        | 12,154.63        | 46,428.04         |
| 351                         | 1,184.63         | 1,130.97         | 1,033.93         | 923.92           | 4,273.44          |
| 352                         | 11,437.86        | 11,631.67        | 9,364.55         | 14,333.92        | 46,768.00         |
| 354                         | 4,157.98         | 3,949.58         | 4,121.75         | 3,654.97         | 15,884.28         |
| 355                         | 6,116.35         | 5,092.27         | 5,472.83         | 5,858.77         | 22,540.22         |
| 356                         | 2,007.93         | 2,249.95         | 2,906.35         | 2,203.35         | 9,367.59          |
| 357                         | 889.93           | 906.03           | 887.24           | 533.51           | 3,216.71          |
| 358                         | 8,515.22         | 11,651.80        | 11,594.73        | 12,738.04        | 44,499.80         |
| 359                         | 2,483.30         | 3,115.20         | 3,430.47         | 2,554.41         | 11,583.37         |
| 360                         | 467.32           | 446.75           | 409.19           | 387.72           | 1,710.99          |
| 361                         | 1,325.50         | 1,313.07         | 2,320.88         | 1,278.01         | 6,237.46          |
| 362                         | 2,848.40         | 2,816.56         | 3,945.20         | 2,319.00         | 11,929.15         |
| 363                         | 2,185.73         | 1,694.44         | 2,212.75         | 1,824.13         | 7,917.05          |
| 364                         | 299.00           | 272.70           | 263.85           | 258.48           | 1,094.03          |
| 365                         | 3,278.87         | 3,338.80         | 2,558.88         | 3,069.22         | 12,245.77         |
| 366                         | 9,140.32         | 6,025.13         | 11,902.23        | 10,321.38        | 37,389.05         |
| 367                         | 224.05           | 168.59           | 183.80           | 195.87           | 772.31            |
| 368                         | 688.51           | 615.08           | 617.58           | 608.91           | 2,530.08          |
| 369                         | 6.26             | 9.84             | 8.94             | 12.97            | 38.01             |
| <b>AL - ALABAMA - Total</b> | <b>67,914.39</b> | <b>69,271.28</b> | <b>74,008.47</b> | <b>75,231.20</b> | <b>286,425.34</b> |

**STATE: AR - ARKANSAS**

| REGISTRANT ZIP CODE 3 | 1ST QUARTER | 2ND QUARTER | 3RD QUARTER | 4TH QUARTER | TOTAL GRAMS |
|-----------------------|-------------|-------------|-------------|-------------|-------------|
| 716                   | 180.67      | 150.71      | 150.71      | 160.54      | 642.63      |
| 717                   | 333.61      | 314.83      | 285.76      | 238.36      | 1,172.56    |
| 718                   | 1,624.68    | 1,615.29    | 1,598.29    | 1,226.67    | 6,064.93    |
| 719                   | 348.82      | 290.68      | 295.78      | 291.57      | 1,226.85    |
| 720                   | 628.76      | 527.07      | 1,412.17    | 469.56      | 3,037.56    |
| 721                   | 2,567.20    | 1,991.65    | 1,793.45    | 1,641.40    | 7,993.70    |
| 722                   | 1,270.67    | 1,226.76    | 714.63      | 1,117.91    | 4,329.97    |
| 723                   | 184.25      | 183.80      | 144.00      | 143.10      | 655.15      |
| 724                   | 2,424.27    | 3,225.65    | 2,288.77    | 2,269.99    | 10,208.68   |
| 725                   | 265.64      | 223.60      | 216.44      | 210.18      | 915.87      |
| 726                   | 415.00      | 331.82      | 255.35      | 225.84      | 1,228.01    |

|                              |                  |                  |                  |                  |                  |
|------------------------------|------------------|------------------|------------------|------------------|------------------|
| 727                          | 3,486.01         | 2,430.62         | 3,471.17         | 2,905.10         | <b>12,292.90</b> |
| 728                          | 168.86           | 189.97           | 180.22           | 110.46           | <b>649.51</b>    |
| 729                          | 947.62           | 875.62           | 809.61           | 636.37           | <b>3,269.21</b>  |
| <b>AR - ARKANSAS - Total</b> | <b>14,846.06</b> | <b>13,578.07</b> | <b>13,616.35</b> | <b>11,647.06</b> | <b>53,687.52</b> |

**STATE: AZ - ARIZONA**

| REGISTRANT ZIP CODE 3       | 1ST QUARTER      | 2ND QUARTER      | 3RD QUARTER      | 4TH QUARTER      | TOTAL GRAMS       |
|-----------------------------|------------------|------------------|------------------|------------------|-------------------|
| 850                         | 32,446.77        | 33,402.08        | 33,049.87        | 32,040.18        | <b>130,938.91</b> |
| 851                         | 482.35           | 709.71           | 949.94           | 950.48           | <b>3,092.48</b>   |
| 852                         | 19,277.99        | 18,360.33        | 18,178.77        | 15,900.02        | <b>71,717.11</b>  |
| 853                         | 5,991.41         | 5,625.15         | 9,838.67         | 8,354.14         | <b>29,809.37</b>  |
| 855                         | 442.28           | 635.47           | 343.90           | 686.00           | <b>2,107.65</b>   |
| 856                         | 464.01           | 398.28           | 349.26           | 271.54           | <b>1,483.09</b>   |
| 857                         | 25,926.51        | 26,373.44        | 25,784.93        | 21,769.16        | <b>99,854.04</b>  |
| 859                         | 355.17           | 301.23           | 291.57           | 264.30           | <b>1,212.27</b>   |
| 860                         | 165.04           | 905.13           | 911.93           | 885.01           | <b>2,867.12</b>   |
| 863                         | 1,298.04         | 1,226.67         | 1,196.71         | 1,145.73         | <b>4,867.15</b>   |
| 864                         | 1,339.81         | 1,263.61         | 1,220.86         | 1,192.68         | <b>5,016.96</b>   |
| 865                         | 9.39             | 2.24             | 9.39             | 4.02             | <b>25.04</b>      |
| <b>AZ - ARIZONA - Total</b> | <b>88,198.78</b> | <b>89,203.34</b> | <b>92,125.79</b> | <b>83,463.26</b> | <b>352,991.18</b> |

**STATE: CA - CALIFORNIA**

| REGISTRANT ZIP CODE 3 | 1ST QUARTER | 2ND QUARTER | 3RD QUARTER | 4TH QUARTER | TOTAL GRAMS      |
|-----------------------|-------------|-------------|-------------|-------------|------------------|
| 900                   | 17,028.48   | 14,617.27   | 15,194.34   | 10,572.08   | <b>57,412.17</b> |
| 902                   | 3,059.74    | 2,139.14    | 3,566.51    | 2,504.77    | <b>11,270.16</b> |
| 903                   | 707.02      | 1,579.06    | 1,246.79    | 344.34      | <b>3,877.22</b>  |
| 904                   | 230.58      | 230.31      | 221.10      | 191.22      | <b>873.20</b>    |
| 905                   | 297.03      | 313.49      | 341.39      | 345.24      | <b>1,297.15</b>  |
| 906                   | 5,445.11    | 5,040.39    | 6,324.39    | 4,224.25    | <b>21,034.14</b> |
| 907                   | 3,811.58    | 4,506.61    | 3,308.12    | 2,881.76    | <b>14,508.06</b> |
| 908                   | 1,603.93    | 1,192.24    | 1,965.27    | 1,355.73    | <b>6,117.16</b>  |
| 910                   | 431.73      | 389.33      | 329.23      | 345.24      | <b>1,495.53</b>  |
| 911                   | 636.19      | 626.97      | 1,049.49    | 586.10      | <b>2,898.75</b>  |
| 912                   | 1,385.43    | 1,434.89    | 980.98      | 1,228.14    | <b>5,029.43</b>  |
| 913                   | 5,356.38    | 5,020.36    | 5,819.15    | 4,346.61    | <b>20,542.49</b> |
| 914                   | 3,073.61    | 2,738.12    | 3,025.84    | 2,068.30    | <b>10,905.87</b> |
| 915                   | 202.22      | 207.77      | 184.34      | 161.98      | <b>756.30</b>    |
| 916                   | 761.49      | 793.24      | 665.34      | 911.84      | <b>3,131.92</b>  |
| 917                   | 9,736.89    | 7,565.91    | 7,607.32    | 6,407.03    | <b>31,317.15</b> |
| 918                   | 38.91       | 27.28       | 32.20       | 37.56       | <b>135.95</b>    |
| 919                   | 2,817.27    | 2,729.89    | 2,796.52    | 2,200.67    | <b>10,544.35</b> |
| 920                   | 11,952.05   | 12,243.80   | 11,983.71   | 8,905.54    | <b>45,085.09</b> |

|                                |                   |                   |                   |                   |                     |
|--------------------------------|-------------------|-------------------|-------------------|-------------------|---------------------|
| 921                            | 10,449.54         | 10,645.77         | 10,084.54         | 7,610.36          | 38,790.22           |
| 922                            | 7,571.36          | 3,246.85          | 5,972.71          | 6,237.10          | 23,028.03           |
| 923                            | 7,937.25          | 7,784.95          | 8,137.70          | 5,477.84          | 29,337.74           |
| 924                            | 194.08            | 186.12            | 145.79            | 141.94            | 667.94              |
| 925                            | 7,271.83          | 7,650.16          | 8,177.32          | 5,577.30          | 28,676.61           |
| 926                            | 2,465.06          | 1,972.60          | 1,922.78          | 2,044.42          | 8,404.86            |
| 927                            | 3,196.05          | 2,907.52          | 3,334.95          | 2,333.94          | 11,772.45           |
| 928                            | 5,246.76          | 4,155.76          | 5,187.26          | 3,827.21          | 18,416.99           |
| 930                            | 10,389.26         | 7,541.13          | 10,137.67         | 6,290.05          | 34,358.11           |
| 931                            | 2,739.64          | 1,830.84          | 2,671.66          | 1,843.54          | 9,085.67            |
| 932                            | 7,276.21          | 7,824.84          | 8,048.53          | 5,934.79          | 29,084.37           |
| 933                            | 9,257.93          | 10,488.45         | 9,051.60          | 6,902.53          | 35,700.51           |
| 934                            | 6,448.53          | 5,823.71          | 5,783.46          | 4,658.57          | 22,714.27           |
| 935                            | 3,307.94          | 2,533.57          | 3,588.96          | 2,860.74          | 12,291.20           |
| 936                            | 2,061.81          | 2,105.69          | 1,731.84          | 1,821.17          | 7,720.52            |
| 937                            | 14,545.63         | 17,080.89         | 15,522.67         | 12,377.69         | 59,526.88           |
| 939                            | 2,244.68          | 2,101.57          | 2,492.69          | 1,597.22          | 8,436.16            |
| 940                            | 4,411.63          | 3,806.03          | 4,425.67          | 3,493.26          | 16,136.59           |
| 941                            | 20,618.60         | 16,744.87         | 19,002.60         | 17,376.49         | 73,742.56           |
| 943                            | 504.44            | 432.98            | 470.72            | 419.38            | 1,827.53            |
| 944                            | 290.50            | 249.81            | 242.02            | 259.11            | 1,041.44            |
| 945                            | 22,219.40         | 18,518.64         | 20,873.06         | 16,231.84         | 77,842.94           |
| 946                            | 9,109.82          | 8,748.22          | 8,103.98          | 7,145.81          | 33,107.83           |
| 947                            | 1,044.12          | 1,381.58          | 1,010.49          | 982.50            | 4,418.69            |
| 948                            | 2,736.60          | 2,670.50          | 2,645.99          | 2,609.32          | 10,662.41           |
| 949                            | 3,074.69          | 2,940.33          | 2,996.51          | 2,801.89          | 11,813.41           |
| 950                            | 7,455.09          | 6,431.00          | 6,690.83          | 8,352.44          | 28,929.37           |
| 951                            | 2,673.63          | 2,665.22          | 2,612.81          | 2,538.58          | 10,490.24           |
| 952                            | 14,706.17         | 13,413.23         | 14,989.34         | 10,064.06         | 53,172.80           |
| 953                            | 16,694.24         | 15,592.43         | 15,015.37         | 14,003.71         | 61,305.75           |
| 954                            | 6,491.82          | 5,921.91          | 5,831.31          | 6,063.58          | 24,308.63           |
| 955                            | 1,127.93          | 1,112.01          | 1,049.40          | 893.15            | 4,182.48            |
| 956                            | 12,665.42         | 12,124.49         | 13,650.24         | 9,450.14          | 47,890.29           |
| 957                            | 601.93            | 510.26            | 487.54            | 429.04            | 2,028.77            |
| 958                            | 19,476.81         | 17,089.03         | 19,258.13         | 12,818.45         | 68,642.43           |
| 959                            | 11,294.66         | 9,836.16          | 10,054.04         | 8,438.49          | 39,623.35           |
| 960                            | 3,069.31          | 3,254.63          | 2,793.75          | 2,360.41          | 11,478.10           |
| 961                            | 276.37            | 260.36            | 217.79            | 211.53            | 966.04              |
| <b>CA - CALIFORNIA - Total</b> | <b>331,722.38</b> | <b>302,980.16</b> | <b>321,055.74</b> | <b>254,097.99</b> | <b>1,209,856.28</b> |

STATE: CO - COLORADO

| REGISTRANT ZIP CODE 3        | 1ST QUARTER      | 2ND QUARTER      | 3RD QUARTER      | 4TH QUARTER      | TOTAL GRAMS       |
|------------------------------|------------------|------------------|------------------|------------------|-------------------|
| 800                          | 9,220.74         | 8,487.74         | 10,289.59        | 8,043.74         | 36,041.82         |
| 801                          | 2,645.81         | 2,683.38         | 3,380.03         | 2,538.04         | 11,247.26         |
| 802                          | 18,599.23        | 19,443.27        | 17,741.77        | 15,418.65        | 71,202.92         |
| 803                          | 394.07           | 693.07           | 822.85           | 594.78           | 2,504.77          |
| 804                          | 248.64           | 218.23           | 214.92           | 194.98           | 876.78            |
| 805                          | 3,928.92         | 3,294.34         | 3,039.89         | 2,594.03         | 12,857.18         |
| 806                          | 520.63           | 681.89           | 831.70           | 856.92           | 2,891.15          |
| 807                          | 46.06            | 54.56            | 28.62            | 41.59            | 170.83            |
| 808                          | 220.47           | 184.43           | 184.25           | 146.23           | 735.38            |
| 809                          | 4,346.07         | 4,246.07         | 4,196.26         | 4,415.65         | 17,204.05         |
| 810                          | 2,530.53         | 2,590.81         | 3,066.72         | 3,573.22         | 11,761.27         |
| 811                          | 578.68           | 304.10           | 584.49           | 313.04           | 1,780.30          |
| 812                          | 161.89           | 154.28           | 149.81           | 161.89           | 627.87            |
| 813                          | 730.72           | 506.95           | 504.89           | 715.07           | 2,457.63          |
| 814                          | 152.05           | 69.58            | 56.35            | 54.56            | 332.54            |
| 815                          | 1,981.72         | 1,083.21         | 1,941.83         | 1,937.27         | 6,944.03          |
| 816                          | 105.09           | 78.71            | 112.87           | 101.69           | 398.37            |
| <b>CO - COLORADO - Total</b> | <b>46,411.33</b> | <b>44,774.62</b> | <b>47,146.83</b> | <b>41,701.36</b> | <b>180,034.13</b> |

**STATE: CT - CONNECTICUT**

| REGISTRANT ZIP CODE 3           | 1ST QUARTER       | 2ND QUARTER       | 3RD QUARTER       | 4TH QUARTER      | TOTAL GRAMS       |
|---------------------------------|-------------------|-------------------|-------------------|------------------|-------------------|
| 060                             | 13,925.81         | 17,130.17         | 11,158.00         | 10,732.80        | 52,946.78         |
| 061                             | 17,616.55         | 14,009.34         | 11,115.33         | 9,747.98         | 52,489.21         |
| 062                             | 5,130.73          | 4,818.13          | 4,953.19          | 4,547.13         | 19,449.18         |
| 063                             | 6,870.24          | 6,859.51          | 6,981.24          | 7,398.30         | 28,109.29         |
| 064                             | 8,271.95          | 8,186.62          | 14,932.72         | 8,139.13         | 39,530.42         |
| 065                             | 19,877.86         | 33,391.44         | 32,625.57         | 19,589.15        | 105,484.02        |
| 066                             | 19,975.53         | 8,811.63          | 19,914.26         | 9,172.61         | 57,874.03         |
| 067                             | 7,333.63          | 7,726.01          | 7,761.25          | 5,828.36         | 28,649.24         |
| 068                             | 6,615.52          | 5,101.57          | 4,758.48          | 6,492.36         | 22,967.92         |
| 069                             | 1,933.87          | 3,705.95          | 1,912.14          | 1,892.10         | 9,444.06          |
| <b>CT - CONNECTICUT - Total</b> | <b>107,551.69</b> | <b>109,740.38</b> | <b>116,112.17</b> | <b>83,539.91</b> | <b>416,944.15</b> |

**STATE: DC - DISTRICT OF COLUMBIA**

| REGISTRANT ZIP CODE 3              | 1ST QUARTER     | 2ND QUARTER     | 3RD QUARTER      | 4TH QUARTER     | TOTAL GRAMS      |
|------------------------------------|-----------------|-----------------|------------------|-----------------|------------------|
| 200                                | 8,511.56        | 8,093.12        | 9,777.34         | 6,411.02        | 32,793.04        |
| 204                                | 821.06          | 584.04          | 609.98           | 603.72          | 2,618.80         |
| <b>DC - DISTRICT OF COLUMBIA -</b> | <b>9,332.62</b> | <b>8,677.16</b> | <b>10,387.32</b> | <b>7,014.74</b> | <b>35,411.84</b> |

**STATE: DE - DELAWARE**

| REGISTRANT ZIP CODE 3 | 1ST QUARTER | 2ND QUARTER | 3RD QUARTER | 4TH QUARTER | TOTAL GRAMS |
|-----------------------|-------------|-------------|-------------|-------------|-------------|
| 197                   | 13,051.62   | 14,494.20   | 10,722.34   | 11,531.14   | 49,799.30   |

|                              |                  |                  |                  |                  |                   |
|------------------------------|------------------|------------------|------------------|------------------|-------------------|
| 198                          | 6,929.45         | 6,893.59         | 5,864.40         | 5,490.45         | 25,177.90         |
| 199                          | 11,408.61        | 13,448.20        | 12,819.79        | 12,260.79        | 49,937.39         |
| <b>DE - DELAWARE - Total</b> | <b>31,389.68</b> | <b>34,835.99</b> | <b>29,406.53</b> | <b>29,282.39</b> | <b>124,914.59</b> |

**STATE: FL - FLORIDA**

| REGISTRANT ZIP CODE 3       | 1ST QUARTER       | 2ND QUARTER       | 3RD QUARTER       | 4TH QUARTER       | TOTAL GRAMS       |
|-----------------------------|-------------------|-------------------|-------------------|-------------------|-------------------|
| 320                         | 7,459.03          | 5,709.49          | 7,034.72          | 6,343.80          | 26,547.04         |
| 321                         | 8,483.83          | 10,253.67         | 8,149.77          | 7,480.31          | 34,367.59         |
| 322                         | 21,460.20         | 20,422.51         | 19,792.79         | 19,250.80         | 80,926.29         |
| 323                         | 3,468.84          | 3,120.92          | 2,468.45          | 4,163.61          | 13,221.83         |
| 324                         | 4,460.55          | 2,548.59          | 4,376.84          | 6,089.97          | 17,475.95         |
| 325                         | 11,761.63         | 12,916.03         | 14,203.61         | 11,110.33         | 49,991.59         |
| 326                         | 4,189.64          | 2,856.98          | 3,821.59          | 4,326.93          | 15,195.14         |
| 327                         | 2,303.62          | 2,218.11          | 1,978.06          | 1,978.41          | 8,478.20          |
| 328                         | 9,803.72          | 12,936.77         | 6,982.45          | 13,923.46         | 43,646.41         |
| 329                         | 6,868.99          | 3,596.38          | 5,238.95          | 5,996.59          | 21,700.92         |
| 330                         | 5,624.97          | 3,755.76          | 5,292.88          | 5,926.74          | 20,600.36         |
| 331                         | 2,462.37          | 1,451.16          | 3,198.46          | 2,422.12          | 9,534.13          |
| 333                         | 3,202.22          | 2,689.01          | 2,169.28          | 3,088.36          | 11,148.87         |
| 334                         | 8,413.98          | 7,569.31          | 9,425.99          | 8,786.05          | 34,195.33         |
| 335                         | 2,162.30          | 1,987.98          | 1,742.74          | 1,728.16          | 7,621.18          |
| 336                         | 10,970.44         | 13,925.54         | 10,853.19         | 11,631.30         | 47,380.47         |
| 337                         | 20,265.85         | 12,153.38         | 20,468.97         | 18,536.62         | 71,424.82         |
| 338                         | 3,019.05          | 3,378.69          | 2,222.49          | 2,868.07          | 11,488.30         |
| 339                         | 13,764.91         | 6,843.95          | 13,892.27         | 14,223.91         | 48,725.03         |
| 341                         | 3,252.40          | 3,350.06          | 3,538.87          | 3,243.09          | 13,384.43         |
| 342                         | 13,443.19         | 8,588.65          | 13,696.57         | 12,728.92         | 48,457.34         |
| 344                         | 10,983.32         | 8,267.30          | 7,469.04          | 9,721.14          | 36,440.81         |
| 346                         | 15,267.41         | 10,924.47         | 16,372.35         | 15,853.69         | 58,417.91         |
| 347                         | 4,344.37          | 2,571.85          | 3,906.29          | 3,929.01          | 14,751.52         |
| 349                         | 2,582.58          | 2,643.13          | 2,366.85          | 2,316.05          | 9,908.61          |
| <b>FL - FLORIDA - Total</b> | <b>200,019.40</b> | <b>166,679.70</b> | <b>190,663.49</b> | <b>197,667.47</b> | <b>755,030.06</b> |

**STATE: GA - GEORGIA**

| REGISTRANT ZIP CODE 3 | 1ST QUARTER | 2ND QUARTER | 3RD QUARTER | 4TH QUARTER | TOTAL GRAMS |
|-----------------------|-------------|-------------|-------------|-------------|-------------|
| 300                   | 15,151.67   | 13,483.53   | 15,241.29   | 13,076.66   | 56,953.16   |
| 301                   | 14,776.20   | 11,905.09   | 13,421.90   | 12,017.87   | 52,121.07   |
| 302                   | 8,192.61    | 7,892.54    | 7,938.60    | 7,702.93    | 31,726.69   |
| 303                   | 4,841.03    | 4,325.32    | 4,368.52    | 4,472.27    | 18,007.13   |
| 304                   | 2,245.93    | 1,605.72    | 1,375.05    | 1,273.18    | 6,499.87    |
| 305                   | 14,778.44   | 12,276.62   | 13,741.20   | 11,549.21   | 52,345.48   |
| 306                   | 5,899.64    | 4,891.56    | 4,759.37    | 4,859.72    | 20,410.30   |

|                             |                   |                   |                   |                   |                   |
|-----------------------------|-------------------|-------------------|-------------------|-------------------|-------------------|
| 307                         | 27,441.98         | 23,340.71         | 25,954.15         | 26,591.67         | <b>103,328.51</b> |
| 308                         | 1,069.70          | 411.87            | 1,022.75          | 1,605.00          | <b>4,109.32</b>   |
| 309                         | 2,684.15          | 1,983.69          | 3,176.73          | 3,258.75          | <b>11,103.32</b>  |
| 310                         | 5,589.55          | 4,422.27          | 5,290.91          | 4,205.29          | <b>19,508.03</b>  |
| 312                         | 2,322.49          | 2,846.25          | 2,143.43          | 2,636.69          | <b>9,948.86</b>   |
| 313                         | 375.92            | 346.67            | 337.28            | 307.05            | <b>1,366.91</b>   |
| 314                         | 4,185.79          | 4,447.05          | 3,949.22          | 3,560.61          | <b>16,142.67</b>  |
| 315                         | 2,546.36          | 2,140.12          | 2,754.57          | 2,917.98          | <b>10,359.03</b>  |
| 316                         | 2,092.09          | 928.83            | 2,087.08          | 2,097.90          | <b>7,205.91</b>   |
| 317                         | 3,224.31          | 3,013.86          | 2,955.19          | 2,359.07          | <b>11,552.43</b>  |
| 318                         | 118.33            | 106.79            | 100.17            | 99.73             | <b>425.02</b>     |
| 319                         | 3,509.45          | 2,813.51          | 3,140.06          | 2,269.81          | <b>11,732.83</b>  |
| 398                         | 1,004.41          | 1,018.72          | 1,046.90          | 1,318.35          | <b>4,388.37</b>   |
| <b>GA - GEORGIA - Total</b> | <b>122,050.06</b> | <b>104,200.73</b> | <b>114,804.38</b> | <b>108,179.74</b> | <b>449,234.91</b> |

**STATE: GU - GUAM**

| REGISTRANT ZIP CODE 3    | 1ST QUARTER  | 2ND QUARTER  | 3RD QUARTER  | 4TH QUARTER  | TOTAL GRAMS   |
|--------------------------|--------------|--------------|--------------|--------------|---------------|
| 969                      | 42.48        | 43.83        | 33.54        | 43.38        | <b>163.23</b> |
| <b>GU - GUAM - Total</b> | <b>42.48</b> | <b>43.83</b> | <b>33.54</b> | <b>43.38</b> | <b>163.23</b> |

**STATE: HI - HAWAII**

| REGISTRANT ZIP CODE 3      | 1ST QUARTER     | 2ND QUARTER     | 3RD QUARTER     | 4TH QUARTER     | TOTAL GRAMS      |
|----------------------------|-----------------|-----------------|-----------------|-----------------|------------------|
| 967                        | 4,094.29        | 3,562.13        | 4,784.06        | 4,498.03        | <b>16,938.50</b> |
| 968                        | 4,219.24        | 1,412.35        | 3,442.37        | 1,882.53        | <b>10,956.49</b> |
| <b>HI - HAWAII - Total</b> | <b>8,313.54</b> | <b>4,974.47</b> | <b>8,226.42</b> | <b>6,380.56</b> | <b>27,894.99</b> |

**STATE: IA - IOWA**

| REGISTRANT ZIP CODE 3 | 1ST QUARTER | 2ND QUARTER | 3RD QUARTER | 4TH QUARTER | TOTAL GRAMS      |
|-----------------------|-------------|-------------|-------------|-------------|------------------|
| 500                   | 405.16      | 366.26      | 371.09      | 461.33      | <b>1,603.84</b>  |
| 501                   | 158.58      | 158.76      | 158.76      | 167.25      | <b>643.34</b>    |
| 502                   | 212.87      | 212.60      | 214.66      | 198.56      | <b>838.68</b>    |
| 503                   | 4,536.31    | 4,915.89    | 4,852.30    | 3,577.60    | <b>17,882.10</b> |
| 504                   | 166.81      | 148.47      | 151.15      | 141.05      | <b>607.48</b>    |
| 505                   | 194.71      | 194.08      | 182.90      | 186.93      | <b>758.63</b>    |
| 506                   | 768.56      | 766.77      | 426.63      | 436.47      | <b>2,398.42</b>  |
| 507                   | 269.30      | 243.28      | 507.57      | 333.79      | <b>1,353.94</b>  |
| 508                   | 68.42       | 66.63       | 57.69       | 60.37       | <b>253.12</b>    |
| 510                   | 134.16      | 148.65      | 141.67      | 141.32      | <b>565.80</b>    |
| 511                   | 350.07      | 791.81      | 329.59      | 321.36      | <b>1,792.82</b>  |
| 512                   | 10.29       | 11.18       | 18.34       | 16.99       | <b>56.79</b>     |
| 513                   | 32.65       | 36.67       | 27.28       | 23.70       | <b>120.30</b>    |
| 514                   | 33.36       | 39.80       | 29.07       | 113.59      | <b>215.82</b>    |
| 515                   | 232.10      | 222.71      | 194.08      | 178.88      | <b>827.77</b>    |

|                          |                  |                  |                  |                  |                  |
|--------------------------|------------------|------------------|------------------|------------------|------------------|
| 516                      | 37.56            | 39.80            | 37.12            | 24.15            | 138.63           |
| 520                      | 98.03            | 103.57           | 223.24           | 222.97           | 647.81           |
| 521                      | 10.73            | 11.63            | 12.97            | 19.68            | 55.01            |
| 522                      | 216.36           | 213.40           | 189.61           | 148.92           | 768.29           |
| 523                      | 1,153.95         | 1,126.59         | 1,145.10         | 795.03           | 4,220.67         |
| 524                      | 1,209.85         | 917.56           | 1,462.08         | 1,066.12         | 4,655.62         |
| 525                      | 144.89           | 299.18           | 121.64           | 303.65           | 869.36           |
| 526                      | 158.04           | 242.38           | 152.76           | 329.32           | 882.50           |
| 527                      | 122.98           | 118.87           | 115.38           | 96.60            | 453.82           |
| 528                      | 1,737.37         | 1,719.04         | 1,377.82         | 1,718.14         | 6,552.37         |
| <b>IA - IOWA - Total</b> | <b>12,463.11</b> | <b>13,115.57</b> | <b>12,500.49</b> | <b>11,083.76</b> | <b>49,162.93</b> |

**STATE: ID - IDAHO**

| REGISTRANT ZIP CODE 3     | 1ST QUARTER      | 2ND QUARTER     | 3RD QUARTER     | 4TH QUARTER     | TOTAL GRAMS      |
|---------------------------|------------------|-----------------|-----------------|-----------------|------------------|
| 832                       | 721.78           | 721.78          | 677.06          | 692.98          | 2,813.60         |
| 833                       | 390.67           | 376.54          | 303.20          | 270.11          | 1,340.53         |
| 834                       | 406.68           | 393.36          | 402.48          | 369.21          | 1,571.73         |
| 835                       | 352.30           | 333.16          | 313.93          | 326.55          | 1,325.95         |
| 836                       | 3,648.26         | 2,858.59        | 2,935.78        | 2,848.57        | 12,291.20        |
| 837                       | 5,213.01         | 4,173.54        | 4,317.54        | 4,431.93        | 18,136.02        |
| 838                       | 1,066.57         | 1,000.65        | 944.49          | 973.55          | 3,985.27         |
| <b>ID - IDAHO - Total</b> | <b>11,799.28</b> | <b>9,857.63</b> | <b>9,894.48</b> | <b>9,912.90</b> | <b>41,464.29</b> |

**STATE: IL - ILLINOIS**

| REGISTRANT ZIP CODE 3 | 1ST QUARTER | 2ND QUARTER | 3RD QUARTER | 4TH QUARTER | TOTAL GRAMS |
|-----------------------|-------------|-------------|-------------|-------------|-------------|
| 600                   | 8,838.37    | 8,666.83    | 7,929.12    | 8,074.29    | 33,508.61   |
| 601                   | 7,134.18    | 6,775.71    | 7,888.52    | 5,394.93    | 27,193.34   |
| 602                   | 3,780.18    | 3,932.23    | 4,766.08    | 2,837.22    | 15,315.71   |
| 603                   | 46.96       | 54.83       | 40.70       | 40.25       | 182.73      |
| 604                   | 6,605.86    | 6,915.32    | 7,409.12    | 6,011.98    | 26,942.28   |
| 605                   | 6,448.36    | 4,762.50    | 6,244.07    | 4,703.11    | 22,158.04   |
| 606                   | 58,165.52   | 53,493.89   | 58,478.73   | 51,126.32   | 221,264.45  |
| 607                   | 1,147.52    | 60.46       | 55.99       | 36.85       | 1,300.82    |
| 608                   | 4,011.83    | 3,981.42    | 3,528.41    | 3,459.99    | 14,981.65   |
| 609                   | 1,126.77    | 1,125.16    | 994.48      | 1,134.19    | 4,380.59    |
| 610                   | 1,118.09    | 414.11      | 1,131.68    | 769.18      | 3,433.06    |
| 611                   | 2,254.34    | 2,932.56    | 2,944.63    | 2,813.87    | 10,945.40   |
| 612                   | 1,113.08    | 897.62      | 1,059.42    | 687.79      | 3,757.91    |
| 613                   | 532.62      | 969.80      | 578.23      | 619.82      | 2,700.46    |
| 614                   | 136.84      | 112.25      | 127.45      | 114.93      | 491.47      |
| 615                   | 175.75      | 153.39      | 134.16      | 135.95      | 599.25      |
| 616                   | 8,316.85    | 6,192.68    | 8,523.47    | 7,190.59    | 30,223.59   |

|                              |                   |                   |                   |                   |                   |
|------------------------------|-------------------|-------------------|-------------------|-------------------|-------------------|
| 617                          | 1,766.17          | 461.69            | 1,684.78          | 1,398.57          | 5,311.22          |
| 618                          | 2,022.60          | 855.76            | 2,506.91          | 2,409.96          | 7,795.23          |
| 619                          | 66.63             | 55.01             | 59.12             | 40.07             | 220.83            |
| 620                          | 2,749.03          | 3,252.66          | 3,549.07          | 4,140.89          | 13,691.65         |
| 622                          | 883.22            | 1,421.47          | 853.17            | 815.60            | 3,973.46          |
| 623                          | 362.14            | 346.85            | 324.40            | 301.32            | 1,334.71          |
| 624                          | 145.34            | 142.66            | 156.25            | 156.97            | 601.22            |
| 625                          | 1,948.45          | 1,512.70          | 2,132.52          | 1,482.02          | 7,075.69          |
| 626                          | 173.96            | 135.05            | 134.61            | 130.14            | 573.76            |
| 627                          | 3,418.84          | 2,693.49          | 3,350.87          | 3,703.26          | 13,166.46         |
| 628                          | 195.43            | 187.38            | 202.58            | 186.57            | 771.96            |
| 629                          | 475.37            | 473.41            | 466.25            | 398.81            | 1,813.84          |
| <b>IL - ILLINOIS - Total</b> | <b>125,160.28</b> | <b>112,978.85</b> | <b>127,254.80</b> | <b>110,315.45</b> | <b>475,709.38</b> |

**STATE: IN - INDIANA**

| REGISTRANT ZIP CODE 3       | 1ST QUARTER      | 2ND QUARTER      | 3RD QUARTER      | 4TH QUARTER      | TOTAL GRAMS       |
|-----------------------------|------------------|------------------|------------------|------------------|-------------------|
| 460                         | 612.66           | 541.11           | 466.25           | 468.04           | 2,088.07          |
| 461                         | 1,179.27         | 1,078.20         | 1,845.77         | 2,205.32         | 6,308.56          |
| 462                         | 18,727.13        | 16,119.68        | 17,729.78        | 11,658.76        | 64,235.35         |
| 463                         | 2,941.95         | 3,111.26         | 2,832.74         | 2,306.30         | 11,192.25         |
| 464                         | 5,159.35         | 4,277.92         | 6,377.97         | 6,369.92         | 22,185.14         |
| 465                         | 1,838.89         | 1,665.82         | 1,392.94         | 1,282.21         | 6,179.86          |
| 466                         | 3,702.55         | 4,112.54         | 3,621.43         | 3,162.60         | 14,599.11         |
| 467                         | 894.04           | 869.45           | 833.58           | 834.83           | 3,431.90          |
| 468                         | 6,401.40         | 6,739.21         | 5,187.25         | 6,505.51         | 24,833.37         |
| 469                         | 7,363.60         | 7,226.04         | 7,269.15         | 7,735.40         | 29,594.18         |
| 470                         | 6,768.01         | 4,146.53         | 5,434.55         | 4,147.33         | 20,496.43         |
| 471                         | 12,683.67        | 12,808.61        | 10,978.40        | 8,301.82         | 44,772.50         |
| 472                         | 437.81           | 331.38           | 347.03           | 321.98           | 1,438.20          |
| 473                         | 5,806.98         | 6,218.14         | 7,050.02         | 3,801.20         | 22,876.34         |
| 474                         | 735.20           | 965.50           | 1,126.94         | 1,104.14         | 3,931.78          |
| 475                         | 299.18           | 253.12           | 227.09           | 224.85           | 1,004.23          |
| 476                         | 242.38           | 245.07           | 238.36           | 224.05           | 949.85            |
| 477                         | 4,115.13         | 3,510.07         | 3,895.29         | 2,277.59         | 13,798.09         |
| 478                         | 139.53           | 533.06           | 469.56           | 1,078.20         | 2,220.35          |
| 479                         | 1,017.29         | 1,219.34         | 812.47           | 1,139.47         | 4,188.56          |
| <b>IN - INDIANA - Total</b> | <b>81,066.00</b> | <b>75,972.04</b> | <b>78,136.57</b> | <b>65,149.51</b> | <b>300,324.12</b> |

**STATE: KS - KANSAS**

| REGISTRANT ZIP CODE 3 | 1ST QUARTER | 2ND QUARTER | 3RD QUARTER | 4TH QUARTER | TOTAL GRAMS |
|-----------------------|-------------|-------------|-------------|-------------|-------------|
| 660                   | 1,760.27    | 1,722.79    | 1,603.66    | 1,657.05    | 6,743.78    |
| 661                   | 3,545.85    | 4,144.47    | 3,438.07    | 3,704.07    | 14,832.46   |



|                            |                  |                  |                  |                  |                  |
|----------------------------|------------------|------------------|------------------|------------------|------------------|
| 662                        | 1,823.06         | 1,713.76         | 1,439.45         | 1,685.41         | 6,661.67         |
| 664                        | 103.75           | 92.12            | 76.92            | 88.10            | 360.89           |
| 665                        | 129.60           | 140.51           | 121.19           | 130.94           | 522.24           |
| 666                        | 2,096.12         | 1,118.09         | 1,368.97         | 1,888.35         | 6,471.52         |
| 667                        | 364.02           | 333.16           | 309.46           | 332.72           | 1,339.36         |
| 668                        | 92.12            | 96.60            | 83.63            | 79.60            | 351.95           |
| 669                        | 88.99            | 81.39            | 75.13            | 74.68            | 320.20           |
| 670                        | 548.09           | 525.91           | 512.04           | 501.76           | 2,087.80         |
| 671                        | 276.64           | 243.46           | 208.84           | 213.76           | 942.70           |
| 672                        | 8,895.79         | 11,585.97        | 9,377.78         | 9,741.62         | 39,601.17        |
| 673                        | 115.82           | 114.04           | 133.27           | 113.14           | 476.27           |
| 674                        | 250.07           | 238.80           | 215.55           | 188.72           | 893.15           |
| 675                        | 188.27           | 178.88           | 179.33           | 183.80           | 730.28           |
| 676                        | 78.71            | 67.97            | 61.71            | 79.60            | 288.00           |
| 677                        | 32.20            | 37.56            | 27.28            | 35.33            | 132.37           |
| 678                        | 156.97           | 154.73           | 175.75           | 146.06           | 633.50           |
| 679                        | 29.96            | 31.75            | 24.15            | 25.94            | 111.80           |
| <b>KS - KANSAS - Total</b> | <b>20,576.30</b> | <b>22,621.97</b> | <b>19,432.18</b> | <b>20,870.64</b> | <b>83,501.09</b> |

**STATE: KY - KENTUCKY**

| REGISTRANT ZIP CODE 3 | 1ST QUARTER | 2ND QUARTER | 3RD QUARTER | 4TH QUARTER | TOTAL GRAMS |
|-----------------------|-------------|-------------|-------------|-------------|-------------|
| 400                   | 548.80      | 379.67      | 517.86      | 498.18      | 1,944.52    |
| 401                   | 175.75      | 177.09      | 173.07      | 168.15      | 694.05      |
| 402                   | 11,740.43   | 9,212.86    | 9,639.22    | 8,380.71    | 38,973.21   |
| 403                   | 1,642.12    | 2,461.66    | 1,810.71    | 2,177.33    | 8,091.82    |
| 404                   | 937.42      | 1,109.50    | 1,525.67    | 1,161.38    | 4,733.97    |
| 405                   | 4,204.29    | 3,895.42    | 4,188.75    | 3,840.82    | 16,129.28   |
| 406                   | 1,566.99    | 1,719.04    | 1,877.70    | 1,605.00    | 6,768.73    |
| 407                   | 2,186.36    | 2,161.32    | 1,741.40    | 2,142.54    | 8,231.61    |
| 408                   | 80.05       | 79.15       | 56.79       | 61.71       | 277.71      |
| 409                   | 165.02      | 147.58      | 148.47      | 153.84      | 614.90      |
| 410                   | 11,288.31   | 10,561.25   | 10,061.82   | 9,590.20    | 41,501.59   |
| 411                   | 2,285.46    | 2,275.35    | 4,730.75    | 2,611.20    | 11,902.76   |
| 412                   | 1,242.77    | 862.65      | 1,237.85    | 1,232.48    | 4,575.75    |
| 413                   | 195.43      | 158.31      | 172.62      | 151.60      | 677.96      |
| 414                   | 86.76       | 74.68       | 55.01       | 76.47       | 292.92      |
| 415                   | 1,204.31    | 1,217.28    | 1,580.40    | 840.74      | 4,842.73    |
| 416                   | 164.12      | 151.42      | 139.97      | 147.13      | 602.65      |
| 417                   | 2,577.66    | 2,537.41    | 2,545.91    | 2,007.48    | 9,668.46    |
| 418                   | 37.12       | 36.22       | 23.25       | 33.09       | 129.69      |
| 420                   | 1,694.26    | 2,369.80    | 1,410.74    | 2,400.57    | 7,875.37    |

|                              |                  |                  |                  |                  |                   |
|------------------------------|------------------|------------------|------------------|------------------|-------------------|
| 421                          | 2,473.02         | 2,602.70         | 2,178.94         | 2,111.68         | 9,366.34          |
| 422                          | 1,718.14         | 1,710.09         | 1,692.65         | 1,703.38         | 6,824.27          |
| 423                          | 770.70           | 760.24           | 1,296.88         | 737.43           | 3,565.26          |
| 424                          | 356.69           | 367.87           | 321.36           | 283.52           | 1,329.44          |
| 425                          | 119.85           | 431.01           | 690.92           | 900.21           | 2,142.00          |
| 426                          | 87.20            | 90.60            | 72.89            | 63.95            | 314.65            |
| 427                          | 1,686.39         | 2,398.78         | 1,309.40         | 1,650.62         | 7,045.19          |
| <b>KY - KENTUCKY - Total</b> | <b>51,235.42</b> | <b>49,948.97</b> | <b>51,201.01</b> | <b>46,731.41</b> | <b>199,116.82</b> |

**STATE: LA - LOUISIANA**

| REGISTRANT ZIP CODE 3         | 1ST QUARTER      | 2ND QUARTER      | 3RD QUARTER      | 4TH QUARTER      | TOTAL GRAMS       |
|-------------------------------|------------------|------------------|------------------|------------------|-------------------|
| 700                           | 6,570.80         | 7,973.58         | 5,999.55         | 6,930.35         | 27,474.27         |
| 701                           | 5,769.33         | 3,121.37         | 5,231.08         | 5,318.37         | 19,440.14         |
| 703                           | 158.93           | 170.38           | 131.92           | 165.46           | 626.71            |
| 704                           | 3,940.10         | 3,903.70         | 3,810.77         | 3,842.07         | 15,496.64         |
| 705                           | 3,465.17         | 3,398.27         | 4,254.48         | 2,351.20         | 13,469.13         |
| 706                           | 2,042.63         | 2,126.44         | 1,856.33         | 1,924.75         | 7,950.14          |
| 707                           | 380.57           | 348.64           | 355.97           | 372.70           | 1,457.87          |
| 708                           | 3,676.25         | 3,867.92         | 3,842.70         | 2,607.44         | 13,994.32         |
| 710                           | 396.22           | 391.75           | 370.28           | 353.65           | 1,511.89          |
| 711                           | 4,474.33         | 3,725.18         | 3,852.68         | 3,737.20         | 15,789.38         |
| 712                           | 988.76           | 1,611.08         | 930.62           | 913.99           | 4,444.45          |
| 713                           | 3,873.65         | 3,819.98         | 3,781.08         | 3,772.58         | 15,247.28         |
| 714                           | 377.88           | 358.21           | 329.68           | 326.90           | 1,392.67          |
| <b>LA - LOUISIANA - Total</b> | <b>36,114.62</b> | <b>34,816.49</b> | <b>34,747.14</b> | <b>32,616.66</b> | <b>138,294.90</b> |

**STATE: MA - MASSACHUSETTS**

| REGISTRANT ZIP CODE 3 | 1ST QUARTER | 2ND QUARTER | 3RD QUARTER | 4TH QUARTER | TOTAL GRAMS |
|-----------------------|-------------|-------------|-------------|-------------|-------------|
| 010                   | 11,239.03   | 11,124.64   | 11,786.22   | 9,847.52    | 43,997.41   |
| 011                   | 7,643.63    | 6,089.25    | 7,874.30    | 6,420.99    | 28,028.17   |
| 012                   | 5,385.09    | 3,465.89    | 5,487.32    | 3,497.46    | 17,835.77   |
| 013                   | 1,436.05    | 1,116.30    | 1,401.08    | 1,243.13    | 5,196.55    |
| 014                   | 6,409.27    | 5,234.30    | 6,478.14    | 4,830.65    | 22,952.36   |
| 015                   | 4,443.11    | 4,237.22    | 4,285.96    | 3,213.76    | 16,180.05   |
| 016                   | 9,106.53    | 8,707.94    | 9,066.01    | 7,394.91    | 34,275.40   |
| 017                   | 3,815.06    | 3,721.24    | 3,666.59    | 2,915.12    | 14,118.01   |
| 018                   | 18,906.72   | 14,903.66   | 16,880.28   | 11,396.53   | 62,087.19   |
| 019                   | 13,175.23   | 12,415.97   | 12,955.83   | 11,367.38   | 49,914.41   |
| 020                   | 654.88      | 602.56      | 480.83      | 628.49      | 2,366.76    |
| 021                   | 24,928.99   | 20,611.68   | 24,915.57   | 19,408.32   | 89,864.56   |
| 022                   | 278.25      | 297.03      | 289.34      | 347.30      | 1,211.91    |
| 023                   | 9,502.02    | 8,445.37    | 9,453.90    | 6,759.25    | 34,160.53   |

|                                   |                   |                   |                   |                   |                   |
|-----------------------------------|-------------------|-------------------|-------------------|-------------------|-------------------|
| 024                               | 1,268.44          | 954.86            | 1,260.48          | 1,222.82          | 4,706.60          |
| 025                               | 3,563.02          | 2,451.28          | 3,565.08          | 3,469.56          | 13,048.94         |
| 026                               | 2,858.06          | 2,452.36          | 3,194.26          | 1,785.22          | 10,289.89         |
| 027                               | 19,037.57         | 15,971.66         | 19,244.00         | 14,307.45         | 68,560.68         |
| <b>MA - MASSACHUSETTS - Total</b> | <b>143,650.94</b> | <b>122,803.21</b> | <b>142,285.19</b> | <b>110,055.87</b> | <b>518,795.21</b> |

**STATE: MD - MARYLAND**

| REGISTRANT ZIP CODE 3        | 1ST QUARTER       | 2ND QUARTER       | 3RD QUARTER       | 4TH QUARTER       | TOTAL GRAMS       |
|------------------------------|-------------------|-------------------|-------------------|-------------------|-------------------|
| 206                          | 4,768.85          | 3,769.09          | 5,096.47          | 3,827.09          | 17,461.51         |
| 207                          | 2,487.59          | 3,318.49          | 2,229.47          | 2,807.07          | 10,842.63         |
| 208                          | 2,706.54          | 2,781.41          | 3,170.55          | 2,541.80          | 11,200.30         |
| 209                          | 834.92            | 1,406.00          | 934.65            | 775.44            | 3,951.01          |
| 210                          | 35,257.16         | 26,778.11         | 31,467.41         | 33,954.73         | 127,457.41        |
| 211                          | 4,858.92          | 4,868.49          | 5,722.19          | 4,581.47          | 20,031.07         |
| 212                          | 101,461.27        | 94,715.58         | 99,609.16         | 96,376.53         | 392,162.54        |
| 214                          | 2,344.85          | 1,788.00          | 2,337.78          | 2,316.50          | 8,787.12          |
| 215                          | 3,473.67          | 3,455.34          | 3,486.64          | 2,826.39          | 13,242.04         |
| 216                          | 3,641.28          | 2,513.26          | 3,691.55          | 2,490.46          | 12,336.55         |
| 217                          | 13,183.63         | 13,235.60         | 13,824.03         | 11,400.83         | 51,644.09         |
| 218                          | 4,750.52          | 4,811.60          | 5,080.64          | 4,061.65          | 18,704.41         |
| 219                          | 7,893.53          | 6,509.89          | 7,209.67          | 6,703.08          | 28,316.17         |
| <b>MD - MARYLAND - Total</b> | <b>187,662.74</b> | <b>169,950.86</b> | <b>183,860.20</b> | <b>174,663.05</b> | <b>716,136.84</b> |

**STATE: ME - MAINE**

| REGISTRANT ZIP CODE 3     | 1ST QUARTER      | 2ND QUARTER      | 3RD QUARTER      | 4TH QUARTER      | TOTAL GRAMS       |
|---------------------------|------------------|------------------|------------------|------------------|-------------------|
| 039                       | 78.26            | 69.32            | 78.71            | 66.19            | 292.47            |
| 040                       | 4,782.00         | 3,631.35         | 3,664.80         | 3,623.21         | 15,701.37         |
| 041                       | 5,006.67         | 4,178.64         | 5,975.13         | 2,974.68         | 18,135.12         |
| 042                       | 1,986.46         | 1,371.03         | 1,945.59         | 1,374.07         | 6,677.14          |
| 043                       | 598.26           | 605.51           | 541.74           | 528.68           | 2,274.19          |
| 044                       | 10,878.23        | 7,824.93         | 9,479.30         | 8,103.80         | 36,286.26         |
| 045                       | 91.68            | 83.63            | 88.55            | 75.13            | 338.98            |
| 046                       | 1,393.65         | 1,397.95         | 1,389.90         | 1,079.54         | 5,261.04          |
| 047                       | 75.13            | 64.84            | 85.86            | 64.84            | 290.68            |
| 048                       | 1,593.82         | 1,519.59         | 1,499.19         | 1,975.19         | 6,587.79          |
| 049                       | 4,326.39         | 2,597.34         | 5,081.80         | 2,467.65         | 14,473.18         |
| <b>ME - MAINE - Total</b> | <b>30,810.56</b> | <b>23,344.11</b> | <b>29,830.57</b> | <b>22,332.99</b> | <b>106,318.22</b> |

**STATE: MI - MICHIGAN**

| REGISTRANT ZIP CODE 3 | 1ST QUARTER | 2ND QUARTER | 3RD QUARTER | 4TH QUARTER | TOTAL GRAMS |
|-----------------------|-------------|-------------|-------------|-------------|-------------|
| 480                   | 16,152.15   | 15,202.07   | 16,132.34   | 15,494.05   | 62,980.62   |
| 481                   | 11,080.18   | 13,340.42   | 10,089.64   | 10,444.18   | 44,954.42   |
| 482                   | 15,121.96   | 15,534.19   | 14,943.81   | 14,225.07   | 59,825.04   |

|                              |                   |                   |                   |                   |                   |
|------------------------------|-------------------|-------------------|-------------------|-------------------|-------------------|
| 483                          | 10,969.10         | 12,088.98         | 12,762.01         | 11,650.19         | 47,470.28         |
| 484                          | 1,054.68          | 903.97            | 902.00            | 877.41            | 3,738.06          |
| 485                          | 9,550.85          | 11,755.99         | 8,696.70          | 9,495.84          | 39,499.39         |
| 486                          | 4,841.83          | 4,705.89          | 5,410.85          | 3,804.42          | 18,762.99         |
| 487                          | 544.42            | 502.65            | 461.06            | 459.72            | 1,967.86          |
| 488                          | 5,816.19          | 5,210.15          | 5,094.86          | 5,358.71          | 21,479.91         |
| 489                          | 7,211.75          | 6,602.46          | 7,888.25          | 5,821.92          | 27,524.38         |
| 490                          | 10,596.94         | 10,150.37         | 10,094.29         | 8,252.00          | 39,093.60         |
| 491                          | 458.83            | 402.48            | 398.90            | 382.53            | 1,642.74          |
| 492                          | 5,275.62          | 4,930.83          | 4,546.24          | 3,077.18          | 17,829.86         |
| 493                          | 966.76            | 953.97            | 856.84            | 773.48            | 3,551.04          |
| 494                          | 9,912.10          | 9,899.40          | 9,000.44          | 8,722.73          | 37,534.66         |
| 495                          | 8,460.04          | 9,103.38          | 9,084.78          | 6,712.56          | 33,360.76         |
| 496                          | 2,517.91          | 2,296.46          | 2,209.79          | 2,082.52          | 9,106.69          |
| 497                          | 5,065.52          | 3,243.99          | 4,922.33          | 3,037.83          | 16,269.67         |
| 498                          | 838.23            | 748.17            | 628.32            | 490.58            | 2,705.29          |
| 499                          | 151.51            | 127.00            | 128.35            | 70.21             | 477.07            |
| <b>MI - MICHIGAN - Total</b> | <b>126,586.59</b> | <b>127,702.82</b> | <b>124,251.80</b> | <b>111,233.13</b> | <b>489,774.33</b> |

**STATE: MN - MINNESOTA**

| REGISTRANT ZIP CODE 3         | 1ST QUARTER      | 2ND QUARTER      | 3RD QUARTER      | 4TH QUARTER      | TOTAL GRAMS       |
|-------------------------------|------------------|------------------|------------------|------------------|-------------------|
| 550                           | 911.48           | 900.12           | 817.84           | 767.22           | 3,396.66          |
| 551                           | 12,991.52        | 11,864.84        | 12,929.63        | 12,382.88        | 50,168.86         |
| 553                           | 2,373.92         | 3,084.88         | 3,074.95         | 2,265.52         | 10,799.25         |
| 554                           | 26,522.63        | 29,354.57        | 27,492.25        | 22,942.08        | 106,311.51        |
| 556                           | 13.42            | 20.12            | 22.81            | 15.20            | 71.55             |
| 557                           | 331.91           | 304.99           | 288.00           | 247.30           | 1,172.20          |
| 558                           | 4,076.85         | 4,006.11         | 2,786.95         | 4,030.35         | 14,900.26         |
| 559                           | 905.94           | 2,170.17         | 1,516.54         | 875.53           | 5,468.18          |
| 560                           | 236.39           | 211.79           | 223.06           | 195.07           | 866.32            |
| 561                           | 37.92            | 34.70            | 47.22            | 33.54            | 153.39            |
| 562                           | 99.46            | 97.49            | 94.90            | 98.83            | 390.67            |
| 563                           | 1,944.87         | 2,108.73         | 2,798.31         | 1,478.35         | 8,330.26          |
| 564                           | 3,878.03         | 3,852.54         | 3,873.83         | 3,846.64         | 15,451.03         |
| 565                           | 205.26           | 188.09           | 176.02           | 135.77           | 705.14            |
| 566                           | 214.12           | 108.67           | 97.49            | 86.04            | 506.32            |
| 567                           | 104.64           | 112.69           | 98.83            | 84.79            | 400.96            |
| <b>MN - MINNESOTA - Total</b> | <b>54,848.36</b> | <b>58,420.51</b> | <b>56,338.61</b> | <b>49,485.09</b> | <b>219,092.58</b> |

**STATE: MO - MISSOURI**

| REGISTRANT ZIP CODE 3 | 1ST QUARTER | 2ND QUARTER | 3RD QUARTER | 4TH QUARTER | TOTAL GRAMS |
|-----------------------|-------------|-------------|-------------|-------------|-------------|
| 630                   | 5,301.29    | 4,213.52    | 4,962.94    | 3,195.51    | 17,673.25   |

|                              |                  |                  |                  |                  |                   |
|------------------------------|------------------|------------------|------------------|------------------|-------------------|
| 631                          | 9,563.78         | 12,392.00        | 10,251.47        | 9,014.99         | 41,222.24         |
| 633                          | 963.18           | 1,494.54         | 1,933.78         | 1,637.74         | 6,029.24          |
| 634                          | 204.82           | 192.30           | 216.00           | 205.71           | 818.82            |
| 635                          | 50.53            | 46.96            | 33.54            | 23.70            | 154.73            |
| 636                          | 288.71           | 269.57           | 244.17           | 250.88           | 1,053.33          |
| 637                          | 1,538.99         | 2,010.16         | 1,038.76         | 1,143.49         | 5,731.40          |
| 638                          | 127.36           | 124.32           | 115.38           | 122.53           | 489.59            |
| 639                          | 1,249.48         | 977.58           | 737.43           | 754.87           | 3,719.36          |
| 640                          | 966.67           | 954.86           | 908.89           | 863.90           | 3,694.32          |
| 641                          | 3,785.82         | 5,047.99         | 4,291.05         | 4,394.72         | 17,519.58         |
| 644                          | 101.07           | 81.39            | 57.69            | 81.39            | 321.54            |
| 645                          | 2,236.00         | 2,166.24         | 2,155.50         | 1,426.12         | 7,983.86          |
| 646                          | 132.37           | 115.38           | 84.52            | 72.45            | 404.72            |
| 647                          | 161.53           | 142.03           | 131.48           | 128.79           | 563.83            |
| 648                          | 1,637.47         | 1,939.95         | 1,410.74         | 2,252.10         | 7,240.26          |
| 650                          | 157.41           | 133.27           | 119.85           | 119.85           | 530.38            |
| 651                          | 110.91           | 99.10            | 87.20            | 95.07            | 392.28            |
| 652                          | 1,697.12         | 1,369.77         | 1,326.40         | 1,193.93         | 5,587.23          |
| 653                          | 89.89            | 78.71            | 86.31            | 92.12            | 347.03            |
| 654                          | 129.69           | 116.27           | 114.93           | 88.99            | 449.88            |
| 655                          | 200.79           | 188.27           | 161.89           | 164.12           | 715.07            |
| 656                          | 440.31           | 388.08           | 353.02           | 330.21           | 1,511.63          |
| 657                          | 1,587.56         | 1,379.43         | 1,324.34         | 1,468.87         | 5,760.20          |
| 658                          | 4,361.36         | 4,571.28         | 3,691.28         | 4,530.40         | 17,154.32         |
| <b>MO - MISSOURI - Total</b> | <b>37,084.11</b> | <b>40,492.97</b> | <b>35,838.54</b> | <b>33,652.49</b> | <b>147,068.11</b> |

**STATE: MS - MISSISSIPPI**

| REGISTRANT ZIP CODE 3           | 1ST QUARTER     | 2ND QUARTER     | 3RD QUARTER     | 4TH QUARTER     | TOTAL GRAMS      |
|---------------------------------|-----------------|-----------------|-----------------|-----------------|------------------|
| 386                             | 986.08          | 1,258.87        | 1,323.26        | 1,489.18        | 5,057.38         |
| 387                             | 286.66          | 254.90          | 202.58          | 162.33          | 906.47           |
| 388                             | 121.46          | 111.80          | 95.79           | 91.41           | 420.46           |
| 389                             | 96.60           | 88.99           | 95.25           | 59.92           | 340.77           |
| 390                             | 196.86          | 181.56          | 180.67          | 180.67          | 739.76           |
| 391                             | 184.25          | 131.83          | 162.78          | 114.93          | 593.79           |
| 392                             | 1,253.50        | 1,774.49        | 1,430.59        | 1,599.28        | 6,057.86         |
| 393                             | 766.05          | 1,219.96        | 629.66          | 931.07          | 3,546.74         |
| 394                             | 392.64          | 351.50          | 333.16          | 250.43          | 1,327.74         |
| 395                             | 2,464.43        | 2,646.08        | 1,905.07        | 2,441.71        | 9,457.30         |
| 396                             | 165.02          | 146.23          | 117.61          | 133.71          | 562.58           |
| 397                             | 86.13           | 80.23           | 84.61           | 81.75           | 332.72           |
| <b>MS - MISSISSIPPI - Total</b> | <b>6,999.66</b> | <b>8,246.46</b> | <b>6,561.05</b> | <b>7,536.39</b> | <b>29,343.56</b> |

**STATE: MT - MONTANA**

| REGISTRANT ZIP CODE 3       | 1ST QUARTER     | 2ND QUARTER     | 3RD QUARTER     | 4TH QUARTER     | TOTAL GRAMS      |
|-----------------------------|-----------------|-----------------|-----------------|-----------------|------------------|
| 590                         | 53.22           | 52.32           | 55.01           | 58.58           | 219.13           |
| 591                         | 1,463.95        | 1,477.10        | 2,133.68        | 1,507.51        | 6,582.25         |
| 592                         | 22.81           | 19.68           | 21.91           | 26.83           | 91.23            |
| 593                         | 44.72           | 33.54           | 53.22           | 38.91           | 170.38           |
| 594                         | 158.13          | 135.05          | 109.21          | 114.21          | 516.61           |
| 595                         | 32.20           | 27.73           | 25.94           | 9.84            | 95.70            |
| 596                         | 253.12          | 201.24          | 195.43          | 124.77          | 774.55           |
| 597                         | 972.66          | 1,230.96        | 938.40          | 1,205.20        | 4,347.23         |
| 598                         | 2,215.61        | 2,434.47        | 2,597.07        | 2,591.79        | 9,838.94         |
| 599                         | 2,349.68        | 2,364.88        | 2,352.09        | 2,317.03        | 9,383.69         |
| <b>MT - MONTANA - Total</b> | <b>7,566.09</b> | <b>7,976.97</b> | <b>8,481.95</b> | <b>7,994.68</b> | <b>32,019.70</b> |

**STATE: NC - NORTH CAROLINA**

| REGISTRANT ZIP CODE 3              | 1ST QUARTER       | 2ND QUARTER       | 3RD QUARTER       | 4TH QUARTER       | TOTAL GRAMS       |
|------------------------------------|-------------------|-------------------|-------------------|-------------------|-------------------|
| 270                                | 538.97            | 444.07            | 438.26            | 425.29            | 1,846.58          |
| 271                                | 3,947.88          | 5,407.10          | 4,931.72          | 3,318.05          | 17,604.74         |
| 272                                | 6,781.61          | 6,192.02          | 6,445.93          | 6,043.73          | 25,463.29         |
| 273                                | 5,168.74          | 4,068.63          | 4,595.87          | 4,404.92          | 18,238.16         |
| 274                                | 9,287.00          | 3,551.22          | 6,622.14          | 6,535.02          | 25,995.38         |
| 275                                | 7,627.32          | 6,184.24          | 8,277.95          | 7,119.87          | 29,209.38         |
| 276                                | 6,010.37          | 5,420.51          | 6,185.58          | 5,602.16          | 23,218.62         |
| 277                                | 7,066.21          | 6,240.85          | 7,365.83          | 6,348.36          | 27,021.26         |
| 278                                | 5,343.32          | 4,964.01          | 5,812.88          | 4,336.59          | 20,456.81         |
| 279                                | 886.80            | 1,340.97          | 817.03            | 1,126.94          | 4,171.75          |
| 280                                | 9,069.84          | 8,925.40          | 9,498.98          | 8,532.75          | 36,026.97         |
| 281                                | 6,349.26          | 5,430.35          | 6,768.37          | 6,553.72          | 25,101.69         |
| 282                                | 7,237.66          | 7,176.49          | 7,336.05          | 6,386.55          | 28,136.75         |
| 283                                | 9,924.80          | 10,050.46         | 11,839.35         | 8,698.13          | 40,512.74         |
| 284                                | 6,223.48          | 6,245.42          | 5,232.71          | 6,599.69          | 24,301.29         |
| 285                                | 5,175.36          | 3,915.24          | 4,940.58          | 4,345.00          | 18,376.16         |
| 286                                | 14,105.76         | 14,429.53         | 11,553.68         | 12,143.54         | 52,232.51         |
| 287                                | 9,127.44          | 7,621.36          | 7,669.57          | 7,723.77          | 32,142.14         |
| 288                                | 14,889.61         | 11,421.04         | 15,280.47         | 11,718.88         | 53,310.00         |
| 289                                | 1,043.32          | 1,432.38          | 1,048.95          | 960.59            | 4,485.24          |
| <b>NC - NORTH CAROLINA - Total</b> | <b>135,804.74</b> | <b>120,461.28</b> | <b>132,661.89</b> | <b>118,923.54</b> | <b>507,851.46</b> |

**STATE: ND - NORTH DAKOTA**

| REGISTRANT ZIP CODE 3 | 1ST QUARTER | 2ND QUARTER | 3RD QUARTER | 4TH QUARTER | TOTAL GRAMS |
|-----------------------|-------------|-------------|-------------|-------------|-------------|
| 580                   | 75.58       | 75.58       | 80.94       | 59.30       | 291.40      |
| 581                   | 1,192.50    | 1,704.73    | 2,217.31    | 1,675.75    | 6,790.28    |

|                                  |                 |                 |                 |                 |                  |
|----------------------------------|-----------------|-----------------|-----------------|-----------------|------------------|
| 582                              | 207.86          | 188.72          | 165.91          | 202.13          | 764.62           |
| 583                              | 29.52           | 25.04           | 26.83           | 26.83           | 108.22           |
| 584                              | 30.86           | 31.75           | 25.76           | 23.97           | 112.34           |
| 585                              | 792.26          | 808.98          | 1,341.78        | 1,064.34        | 4,007.36         |
| 586                              | 27.28           | 43.38           | 56.79           | 41.59           | 169.04           |
| 587                              | 765.16          | 758.54          | 756.13          | 1,119.70        | 3,399.52         |
| 588                              | 55.01           | 55.01           | 63.06           | 58.14           | 231.20           |
| <b>ND - NORTH DAKOTA - Total</b> | <b>3,176.01</b> | <b>3,691.73</b> | <b>4,734.51</b> | <b>4,271.74</b> | <b>15,873.99</b> |

**STATE: NE - NEBRASKA**

| REGISTRANT ZIP CODE 3        | 1ST QUARTER     | 2ND QUARTER     | 3RD QUARTER     | 4TH QUARTER     | TOTAL GRAMS      |
|------------------------------|-----------------|-----------------|-----------------|-----------------|------------------|
| 680                          | 305.35          | 301.41          | 286.30          | 246.23          | 1,139.29         |
| 681                          | 4,778.42        | 3,836.26        | 5,298.87        | 4,153.95        | 18,067.51        |
| 683                          | 40.96           | 52.77           | 48.74           | 45.17           | 187.65           |
| 684                          | 31.75           | 42.04           | 32.65           | 36.22           | 142.66           |
| 685                          | 1,278.56        | 1,601.33        | 1,615.29        | 1,724.73        | 6,219.91         |
| 686                          | 59.92           | 63.06           | 55.45           | 55.45           | 233.89           |
| 687                          | 165.91          | 144.89          | 148.02          | 126.11          | 584.94           |
| 688                          | 214.21          | 177.54          | 186.48          | 149.81          | 728.04           |
| 689                          | 40.16           | 47.22           | 44.27           | 47.22           | 178.88           |
| 690                          | 17.89           | 18.78           | 15.20           | 13.42           | 65.29            |
| 691                          | 99.99           | 98.21           | 97.85           | 113.23          | 409.28           |
| 692                          | 0.89            | 2.24            | 4.02            | 1.79            | 8.94             |
| 693                          | 113.86          | 98.56           | 99.90           | 75.31           | 387.63           |
| <b>NE - NEBRASKA - Total</b> | <b>7,147.88</b> | <b>6,484.31</b> | <b>7,933.06</b> | <b>6,788.64</b> | <b>28,353.89</b> |

**STATE: NH - NEW HAMPSHIRE**

| REGISTRANT ZIP CODE 3             | 1ST QUARTER      | 2ND QUARTER      | 3RD QUARTER      | 4TH QUARTER      | TOTAL GRAMS       |
|-----------------------------------|------------------|------------------|------------------|------------------|-------------------|
| 030                               | 3,409.99         | 3,300.60         | 3,769.81         | 2,611.29         | 13,091.69         |
| 031                               | 9,971.76         | 7,402.95         | 10,703.46        | 9,111.34         | 37,189.51         |
| 032                               | 537.53           | 1,221.75         | 484.05           | 1,188.03         | 3,431.37          |
| 033                               | 5,947.67         | 6,021.46         | 3,114.21         | 5,764.94         | 20,848.29         |
| 034                               | 1,971.26         | 3,829.82         | 1,967.23         | 1,955.16         | 9,723.47          |
| 035                               | 196.86           | 184.69           | 183.80           | 178.43           | 743.78            |
| 036                               | 28.17            | 29.96            | 33.54            | 25.04            | 116.72            |
| 037                               | 3,217.69         | 2,630.25         | 2,876.66         | 1,888.88         | 10,613.49         |
| 038                               | 6,813.36         | 6,574.20         | 6,341.83         | 4,382.11         | 24,111.50         |
| <b>NH - NEW HAMPSHIRE - Total</b> | <b>32,094.29</b> | <b>31,195.69</b> | <b>29,474.59</b> | <b>27,105.24</b> | <b>119,869.81</b> |

**STATE: NJ - NEW JERSEY**

| REGISTRANT ZIP CODE 3 | 1ST QUARTER | 2ND QUARTER | 3RD QUARTER | 4TH QUARTER | TOTAL GRAMS |
|-----------------------|-------------|-------------|-------------|-------------|-------------|
| 070                   | 7,705.26    | 9,324.03    | 8,224.99    | 8,155.59    | 33,409.86   |
| 071                   | 9,071.54    | 13,429.15   | 10,614.11   | 13,489.52   | 46,604.32   |

|                                |                   |                   |                   |                   |                   |
|--------------------------------|-------------------|-------------------|-------------------|-------------------|-------------------|
| 072                            | 1,578.17          | 1,573.70          | 1,584.43          | 965.06            | 5,701.35          |
| 073                            | 5,560.48          | 5,695.45          | 5,707.61          | 3,104.82          | 20,068.37         |
| 074                            | 702.19            | 602.83            | 570.63            | 540.22            | 2,415.86          |
| 075                            | 3,181.83          | 3,444.78          | 4,371.38          | 2,930.32          | 13,928.31         |
| 076                            | 2,508.79          | 2,081.72          | 2,430.80          | 1,652.67          | 8,673.98          |
| 077                            | 9,515.52          | 10,573.60         | 8,637.76          | 12,874.08         | 41,600.96         |
| 078                            | 3,007.51          | 2,984.61          | 2,967.44          | 2,973.61          | 11,933.17         |
| 079                            | 221.99            | 237.46            | 197.93            | 238.00            | 895.38            |
| 080                            | 3,599.16          | 2,657.98          | 3,485.12          | 3,400.87          | 13,143.12         |
| 081                            | 24,879.44         | 20,136.52         | 25,393.45         | 20,095.56         | 90,504.96         |
| 082                            | 7,381.75          | 9,355.60          | 7,937.62          | 9,258.83          | 33,933.80         |
| 083                            | 4,920.54          | 6,245.60          | 5,745.18          | 7,500.89          | 24,412.20         |
| 084                            | 124.77            | 141.32            | 146.68            | 154.28            | 567.05            |
| 085                            | 382.27            | 396.04            | 399.53            | 365.99            | 1,543.82          |
| 086                            | 5,006.76          | 5,263.99          | 6,507.65          | 5,034.85          | 21,813.25         |
| 087                            | 10,974.74         | 11,627.65         | 11,243.06         | 12,312.31         | 46,157.75         |
| 088                            | 11,130.18         | 8,016.78          | 11,243.77         | 9,141.75          | 39,532.48         |
| 089                            | 3,882.86          | 1,869.12          | 3,978.74          | 1,944.52          | 11,675.23         |
| <b>NJ - NEW JERSEY - Total</b> | <b>115,335.74</b> | <b>115,657.90</b> | <b>121,387.88</b> | <b>116,133.73</b> | <b>468,515.25</b> |

**STATE: NM - NEW MEXICO**

| REGISTRANT ZIP CODE 3          | 1ST QUARTER      | 2ND QUARTER      | 3RD QUARTER      | 4TH QUARTER      | TOTAL GRAMS       |
|--------------------------------|------------------|------------------|------------------|------------------|-------------------|
| 870                            | 1,810.27         | 1,245.00         | 1,253.50         | 1,372.46         | 5,681.23          |
| 871                            | 29,759.82        | 30,418.81        | 33,869.50        | 28,930.80        | 122,978.93        |
| 873                            | 36.67            | 39.35            | 42.04            | 44.72            | 162.78            |
| 874                            | 643.97           | 1,370.85         | 1,250.55         | 452.57           | 3,717.93          |
| 875                            | 5,682.57         | 5,279.91         | 5,477.75         | 8,133.67         | 24,573.91         |
| 877                            | 66.19            | 45.61            | 51.88            | 34.88            | 198.56            |
| 878                            | 13.42            | 14.31            | 12.52            | 16.99            | 57.24             |
| 879                            | 8.50             | 6.71             | 7.16             | 3.58             | 25.94             |
| 880                            | 2,199.87         | 2,345.83         | 2,332.42         | 1,616.63         | 8,494.74          |
| 881                            | 25.94            | 25.49            | 26.38            | 25.76            | 103.57            |
| 882                            | 1,359.31         | 1,012.19         | 1,347.41         | 1,195.37         | 4,914.28          |
| 883                            | 156.07           | 141.32           | 147.13           | 115.82           | 560.34            |
| 884                            | 4.02             | 3.58             | 3.58             | 5.81             | 16.99             |
| <b>NM - NEW MEXICO - Total</b> | <b>41,766.60</b> | <b>41,948.97</b> | <b>45,821.81</b> | <b>41,949.06</b> | <b>171,486.44</b> |

**STATE: NV - NEVADA**

| REGISTRANT ZIP CODE 3 | 1ST QUARTER | 2ND QUARTER | 3RD QUARTER | 4TH QUARTER | TOTAL GRAMS |
|-----------------------|-------------|-------------|-------------|-------------|-------------|
| 890                   | 9,152.84    | 8,308.26    | 9,752.54    | 9,371.17    | 36,584.81   |
| 891                   | 17,218.36   | 15,173.23   | 14,964.83   | 14,351.63   | 61,708.05   |
| 893                   | 35.78       | 33.09       | 33.09       | 26.83       | 128.79      |



|                            |                  |                  |                  |                  |                   |
|----------------------------|------------------|------------------|------------------|------------------|-------------------|
| 894                        | 4,835.13         | 3,885.63         | 4,715.28         | 3,697.00         | 17,133.04         |
| 895                        | 3,107.59         | 4,542.75         | 2,875.94         | 4,397.32         | 14,923.60         |
| 897                        | 1,498.03         | 1,437.66         | 1,405.10         | 1,509.75         | 5,850.54          |
| 898                        | 59.92            | 57.24            | 64.40            | 56.79            | 238.36            |
| <b>NV - NEVADA - Total</b> | <b>35,907.66</b> | <b>33,437.86</b> | <b>33,811.18</b> | <b>33,410.49</b> | <b>136,567.19</b> |

**STATE: NY - NEW YORK**

| REGISTRANT ZIP CODE 3 | 1ST QUARTER | 2ND QUARTER | 3RD QUARTER | 4TH QUARTER | TOTAL GRAMS |
|-----------------------|-------------|-------------|-------------|-------------|-------------|
| 100                   | 85,397.53   | 77,501.96   | 81,097.52   | 59,732.60   | 303,729.61  |
| 101                   | 1,337.75    | 1,356.09    | 1,353.23    | 1,337.31    | 5,384.38    |
| 102                   | 15.20       | 16.10       | 13.42       | 15.20       | 59.92       |
| 103                   | 11,251.64   | 9,838.13    | 9,874.89    | 8,313.90    | 39,278.56   |
| 104                   | 57,101.18   | 53,588.69   | 71,522.57   | 39,530.33   | 221,742.78  |
| 105                   | 4,649.27    | 4,959.63    | 6,134.42    | 4,761.07    | 20,504.39   |
| 106                   | 120.12      | 120.83      | 113.14      | 111.35      | 465.45      |
| 107                   | 4,760.89    | 6,565.70    | 4,824.84    | 3,893.59    | 20,045.02   |
| 108                   | 1,190.00    | 2,003.01    | 1,285.25    | 1,385.43    | 5,863.69    |
| 109                   | 2,927.64    | 3,729.74    | 3,154.82    | 3,396.48    | 13,208.68   |
| 110                   | 3,111.51    | 3,221.43    | 3,303.47    | 3,338.35    | 12,974.76   |
| 111                   | 144.89      | 174.41      | 171.72      | 131.48      | 622.50      |
| 112                   | 31,146.98   | 28,685.38   | 32,557.75   | 26,220.31   | 118,610.42  |
| 113                   | 6,171.63    | 6,635.20    | 7,191.15    | 8,302.62    | 28,300.60   |
| 114                   | 6,817.56    | 5,705.91    | 6,143.19    | 4,988.34    | 23,655.00   |
| 115                   | 2,750.46    | 6,266.35    | 2,743.39    | 4,724.31    | 16,484.51   |
| 116                   | 128.79      | 110.64      | 113.59      | 110.01      | 463.03      |
| 117                   | 9,800.84    | 11,005.95   | 10,222.54   | 8,187.07    | 39,216.40   |
| 118                   | 130.14      | 117.17      | 117.61      | 114.30      | 479.22      |
| 119                   | 2,540.10    | 2,513.71    | 2,527.04    | 1,817.87    | 9,398.71    |
| 120                   | 1,524.59    | 1,054.32    | 1,451.61    | 1,385.43    | 5,415.95    |
| 121                   | 710.78      | 673.93      | 937.60      | 629.21      | 2,951.52    |
| 122                   | 6,964.96    | 6,074.85    | 7,235.79    | 5,201.11    | 25,476.72   |
| 123                   | 417.68      | 464.19      | 438.70      | 540.31      | 1,860.89    |
| 124                   | 3,059.12    | 3,192.02    | 2,587.95    | 3,441.29    | 12,280.38   |
| 125                   | 3,350.42    | 3,592.00    | 6,293.89    | 4,427.28    | 17,663.60   |
| 126                   | 3,415.98    | 3,053.03    | 2,851.35    | 3,135.14    | 12,455.50   |
| 127                   | 338.98      | 327.80      | 295.78      | 257.50      | 1,220.05    |
| 128                   | 771.15      | 683.77      | 665.43      | 676.97      | 2,797.33    |
| 129                   | 1,208.87    | 571.43      | 1,206.10    | 1,025.88    | 4,012.28    |
| 130                   | 1,779.41    | 1,122.47    | 2,193.87    | 1,399.47    | 6,495.22    |
| 131                   | 854.15      | 882.86      | 847.71      | 823.74      | 3,408.47    |
| 132                   | 7,988.24    | 6,829.01    | 7,884.49    | 6,803.61    | 29,505.36   |

|                              |                   |                   |                   |                   |                     |
|------------------------------|-------------------|-------------------|-------------------|-------------------|---------------------|
| 133                          | 195.87            | 183.80            | 211.70            | 188.09            | 779.47              |
| 134                          | 1,612.42          | 1,592.93          | 1,609.65          | 1,594.36          | 6,409.36            |
| 135                          | 221.01            | 479.13            | 721.15            | 442.73            | 1,864.02            |
| 136                          | 767.22            | 801.92            | 1,026.77          | 628.76            | 3,224.67            |
| 137                          | 216.89            | 175.75            | 165.46            | 180.22            | 738.33              |
| 138                          | 491.92            | 447.65            | 461.06            | 478.06            | 1,878.69            |
| 139                          | 1,289.72          | 1,606.34          | 1,621.99          | 1,589.35          | 6,107.41            |
| 140                          | 1,187.85          | 1,162.63          | 1,231.95          | 1,253.32          | 4,835.75            |
| 141                          | 475.64            | 616.69            | 702.19            | 540.40            | 2,334.92            |
| 142                          | 15,914.71         | 13,966.41         | 17,101.38         | 11,346.69         | 58,329.19           |
| 143                          | 804.16            | 850.93            | 1,469.59          | 830.36            | 3,955.04            |
| 144                          | 630.02            | 606.40            | 577.16            | 635.74            | 2,449.31            |
| 145                          | 358.21            | 334.15            | 350.34            | 334.86            | 1,377.55            |
| 146                          | 4,950.33          | 4,720.91          | 6,467.76          | 5,392.82          | 21,531.82           |
| 147                          | 492.01            | 432.08            | 370.19            | 315.45            | 1,609.74            |
| 148                          | 687.08            | 622.41            | 588.25            | 575.10            | 2,472.84            |
| 149                          | 223.15            | 200.79            | 134.61            | 132.37            | 690.92              |
| <b>NY - NEW YORK - Total</b> | <b>294,396.67</b> | <b>281,438.64</b> | <b>314,167.06</b> | <b>236,617.55</b> | <b>1,126,619.92</b> |

## STATE: OH - OHIO

| REGISTRANT ZIP CODE 3 | 1ST QUARTER | 2ND QUARTER | 3RD QUARTER | 4TH QUARTER | TOTAL GRAMS |
|-----------------------|-------------|-------------|-------------|-------------|-------------|
| 430                   | 1,397.77    | 1,351.26    | 1,372.55    | 1,223.72    | 5,345.29    |
| 431                   | 760.24      | 687.61      | 643.79      | 673.39      | 2,765.04    |
| 432                   | 14,841.76   | 14,452.63   | 13,653.41   | 13,382.48   | 56,330.28   |
| 433                   | 601.04      | 587.35      | 555.60      | 511.33      | 2,255.32    |
| 434                   | 254.90      | 312.06      | 269.93      | 264.38      | 1,101.27    |
| 435                   | 274.04      | 220.47      | 224.23      | 203.48      | 922.22      |
| 436                   | 4,900.95    | 3,904.06    | 4,796.49    | 5,231.88    | 18,833.38   |
| 437                   | 299.45      | 497.11      | 451.49      | 669.10      | 1,917.15    |
| 438                   | 102.41      | 96.51       | 74.68       | 87.20       | 360.80      |
| 439                   | 399.17      | 368.14      | 364.65      | 398.28      | 1,530.23    |
| 440                   | 1,326.31    | 1,276.67    | 1,213.25    | 1,225.69    | 5,041.91    |
| 441                   | 9,054.28    | 8,109.44    | 8,420.69    | 8,671.74    | 34,256.15   |
| 442                   | 733.50      | 708.45      | 1,324.79    | 1,889.69    | 4,656.43    |
| 443                   | 4,118.62    | 4,094.92    | 3,703.80    | 3,579.12    | 15,496.46   |
| 444                   | 1,506.62    | 1,676.73    | 1,486.22    | 1,415.57    | 6,085.14    |
| 445                   | 3,969.88    | 4,062.19    | 5,075.00    | 6,075.93    | 19,183.00   |
| 446                   | 571.34      | 504.71      | 502.12      | 498.90      | 2,077.07    |
| 447                   | 1,703.74    | 1,691.76    | 1,498.57    | 1,692.56    | 6,586.63    |
| 448                   | 642.27      | 583.95      | 582.25      | 566.78      | 2,375.26    |
| 449                   | 132.46      | 119.94      | 108.67      | 104.20      | 465.27      |

|                          |                  |                  |                  |                  |                   |
|--------------------------|------------------|------------------|------------------|------------------|-------------------|
| 450                      | 3,361.14         | 3,519.82         | 3,570.27         | 3,589.05         | 14,040.28         |
| 451                      | 732.07           | 744.14           | 692.27           | 639.05           | 2,807.52          |
| 452                      | 12,586.45        | 14,025.98        | 13,891.00        | 13,550.90        | 54,054.33         |
| 453                      | 758.81           | 769.36           | 743.07           | 740.92           | 3,012.16          |
| 454                      | 4,249.47         | 5,597.42         | 5,217.93         | 6,004.74         | 21,069.57         |
| 455                      | 150.71           | 158.31           | 140.15           | 151.51           | 600.68            |
| 456                      | 950.75           | 1,276.76         | 1,774.94         | 2,158.37         | 6,160.81          |
| 457                      | 348.37           | 238.80           | 300.25           | 338.08           | 1,225.51          |
| 458                      | 779.11           | 1,189.64         | 620.80           | 791.90           | 3,381.46          |
| <b>OH - OHIO - Total</b> | <b>71,507.63</b> | <b>72,826.19</b> | <b>73,272.85</b> | <b>76,329.93</b> | <b>293,936.59</b> |

**STATE: OK - OKLAHOMA**

| REGISTRANT ZIP CODE 3        | 1ST QUARTER      | 2ND QUARTER      | 3RD QUARTER      | 4TH QUARTER      | TOTAL GRAMS       |
|------------------------------|------------------|------------------|------------------|------------------|-------------------|
| 730                          | 974.18           | 813.64           | 726.97           | 593.88           | 3,108.67          |
| 731                          | 11,245.02        | 9,588.42         | 10,800.95        | 10,584.15        | 42,218.54         |
| 734                          | 2,033.60         | 1,127.39         | 1,834.06         | 1,680.31         | 6,675.35          |
| 735                          | 1,083.57         | 1,101.01         | 1,035.72         | 1,747.21         | 4,967.50          |
| 736                          | 62.61            | 65.29            | 50.98            | 37.12            | 216.00            |
| 737                          | 136.49           | 136.40           | 118.06           | 96.86            | 487.81            |
| 738                          | 60.82            | 60.82            | 61.71            | 60.37            | 243.72            |
| 739                          | 21.91            | 22.81            | 20.12            | 16.10            | 80.94             |
| 740                          | 2,543.85         | 2,514.16         | 2,320.34         | 2,025.82         | 9,404.17          |
| 741                          | 11,554.66        | 8,811.27         | 12,379.75        | 9,887.68         | 42,633.36         |
| 743                          | 1,235.61         | 142.21           | 1,201.18         | 621.61           | 3,200.61          |
| 744                          | 566.87           | 510.70           | 435.57           | 317.33           | 1,830.48          |
| 745                          | 430.21           | 418.58           | 508.91           | 546.48           | 1,904.18          |
| 746                          | 1,071.94         | 1,033.93         | 1,102.35         | 1,110.40         | 4,318.61          |
| 747                          | 165.46           | 189.52           | 151.06           | 131.83           | 637.89            |
| 748                          | 231.20           | 242.38           | 211.97           | 173.07           | 858.62            |
| 749                          | 3,668.83         | 3,094.62         | 3,633.50         | 4,293.57         | 14,690.52         |
| <b>OK - OKLAHOMA - Total</b> | <b>37,086.83</b> | <b>29,873.14</b> | <b>36,593.21</b> | <b>33,923.79</b> | <b>137,476.97</b> |

**STATE: OR - OREGON**

| REGISTRANT ZIP CODE 3 | 1ST QUARTER | 2ND QUARTER | 3RD QUARTER | 4TH QUARTER | TOTAL GRAMS |
|-----------------------|-------------|-------------|-------------|-------------|-------------|
| 970                   | 2,059.53    | 1,959.09    | 1,940.67    | 1,874.57    | 7,833.87    |
| 971                   | 1,201.54    | 1,128.73    | 1,123.37    | 1,033.48    | 4,487.12    |
| 972                   | 35,717.00   | 26,034.16   | 32,155.82   | 26,009.51   | 119,916.49  |
| 973                   | 9,241.39    | 8,846.42    | 8,997.75    | 7,615.73    | 34,701.29   |
| 974                   | 6,471.79    | 6,965.32    | 6,579.12    | 6,834.47    | 26,850.69   |
| 975                   | 7,016.03    | 6,166.62    | 7,163.34    | 5,357.37    | 25,703.36   |
| 976                   | 253.12      | 240.15      | 228.97      | 203.48      | 925.70      |
| 977                   | 1,195.10    | 1,592.03    | 1,185.44    | 1,235.88    | 5,208.45    |

|                            |                  |                  |                  |                  |                   |
|----------------------------|------------------|------------------|------------------|------------------|-------------------|
| 978                        | 391.30           | 373.86           | 339.87           | 289.43           | 1,394.46          |
| 979                        | 137.29           | 121.64           | 127.90           | 105.99           | 492.81            |
| <b>OR - OREGON - Total</b> | <b>63,684.08</b> | <b>53,428.02</b> | <b>59,842.24</b> | <b>50,559.90</b> | <b>227,514.24</b> |

**STATE: PA - PENNSYLVANIA**

| REGISTRANT ZIP CODE 3 | 1ST QUARTER | 2ND QUARTER | 3RD QUARTER | 4TH QUARTER | TOTAL GRAMS |
|-----------------------|-------------|-------------|-------------|-------------|-------------|
| 150                   | 3,294.34    | 4,835.93    | 2,754.30    | 3,710.42    | 14,595.00   |
| 151                   | 474.39      | 441.65      | 391.93      | 394.79      | 1,702.76    |
| 152                   | 21,109.54   | 21,852.52   | 20,927.44   | 20,246.62   | 84,136.12   |
| 153                   | 5,207.11    | 3,187.19    | 4,914.82    | 3,373.77    | 16,682.89   |
| 154                   | 3,032.91    | 3,395.14    | 2,768.17    | 1,988.25    | 11,184.47   |
| 155                   | 54.56       | 72.00       | 67.35       | 75.58       | 269.48      |
| 156                   | 7,646.49    | 8,396.18    | 8,012.04    | 7,280.86    | 31,335.57   |
| 157                   | 997.26      | 538.88      | 1,032.14    | 567.77      | 3,136.03    |
| 158                   | 133.44      | 145.61      | 133.53      | 125.13      | 537.71      |
| 159                   | 3,092.48    | 3,796.64    | 3,085.68    | 3,065.65    | 13,040.44   |
| 160                   | 4,153.95    | 3,671.15    | 4,399.20    | 2,132.79    | 14,357.09   |
| 161                   | 6,170.91    | 4,820.55    | 5,210.60    | 5,320.34    | 21,522.39   |
| 162                   | 232.90      | 231.65      | 198.56      | 182.46      | 845.57      |
| 163                   | 1,576.83    | 2,142.71    | 1,541.77    | 2,264.89    | 7,526.20    |
| 164                   | 97.94       | 93.91       | 91.68       | 89.44       | 372.96      |
| 165                   | 3,665.97    | 3,712.03    | 3,723.39    | 2,407.10    | 13,508.48   |
| 166                   | 6,227.71    | 4,535.77    | 5,990.33    | 4,983.87    | 21,737.68   |
| 167                   | 163.23      | 173.96      | 148.47      | 156.07      | 641.73      |
| 168                   | 3,015.47    | 2,569.70    | 3,008.76    | 2,028.95    | 10,622.88   |
| 169                   | 118.51      | 126.74      | 96.06       | 75.58       | 416.88      |
| 170                   | 6,609.79    | 6,540.52    | 5,874.33    | 5,701.71    | 24,726.36   |
| 171                   | 3,844.58    | 1,977.70    | 4,666.08    | 1,990.49    | 12,478.85   |
| 172                   | 459.27      | 451.22      | 431.82      | 409.28      | 1,751.59    |
| 173                   | 1,894.34    | 1,850.33    | 1,780.84    | 2,342.88    | 7,868.39    |
| 174                   | 2,666.21    | 3,337.10    | 4,020.60    | 2,547.70    | 12,571.60   |
| 175                   | 349.71      | 363.39      | 364.02      | 309.46      | 1,386.59    |
| 176                   | 5,581.41    | 4,688.53    | 5,570.32    | 4,871.89    | 20,712.16   |
| 177                   | 3,710.69    | 5,103.89    | 4,678.70    | 3,106.16    | 16,599.44   |
| 178                   | 1,106.64    | 1,057.00    | 1,151.36    | 998.24      | 4,313.24    |
| 179                   | 142.75      | 143.55      | 127.90      | 116.72      | 530.92      |
| 180                   | 5,245.92    | 3,995.20    | 4,158.96    | 3,995.28    | 17,395.36   |
| 181                   | 1,883.16    | 1,827.80    | 1,679.95    | 1,108.88    | 6,499.78    |
| 182                   | 176.20      | 160.10      | 148.29      | 144.89      | 629.48      |
| 183                   | 3,321.80    | 3,304.54    | 3,269.48    | 2,567.11    | 12,462.93   |
| 184                   | 249.54      | 255.26      | 243.72      | 209.74      | 958.26      |

|                                  |                   |                   |                   |                   |                   |
|----------------------------------|-------------------|-------------------|-------------------|-------------------|-------------------|
| 185                              | 2,584.37          | 3,049.28          | 2,459.33          | 2,502.08          | 10,595.06         |
| 186                              | 407.40            | 410.98            | 380.57            | 361.78            | 1,560.73          |
| 187                              | 5,802.96          | 4,769.30          | 5,695.99          | 4,447.23          | 20,715.47         |
| 188                              | 161.44            | 182.90            | 118.96            | 126.56            | 589.86            |
| 189                              | 6,222.52          | 5,676.40          | 6,280.57          | 5,035.83          | 23,215.31         |
| 190                              | 13,243.74         | 14,301.99         | 14,547.33         | 9,893.50          | 51,986.55         |
| 191                              | 40,701.05         | 31,284.54         | 38,375.77         | 34,929.74         | 145,291.09        |
| 193                              | 3,867.83          | 4,592.48          | 3,877.13          | 3,790.65          | 16,128.09         |
| 194                              | 6,067.52          | 5,629.17          | 5,554.31          | 4,897.56          | 22,148.56         |
| 195                              | 135.05            | 152.94            | 128.79            | 140.06            | 556.85            |
| 196                              | 2,592.90          | 3,478.16          | 2,959.21          | 3,213.65          | 12,243.92         |
| <b>PA - PENNSYLVANIA - Total</b> | <b>189,494.72</b> | <b>177,324.20</b> | <b>187,040.52</b> | <b>160,229.35</b> | <b>714,088.79</b> |

**STATE: PR - PUERTO RICO**

| REGISTRANT ZIP CODE 3           | 1ST QUARTER      | 2ND QUARTER      | 3RD QUARTER      | 4TH QUARTER      | TOTAL GRAMS      |
|---------------------------------|------------------|------------------|------------------|------------------|------------------|
| 006                             | 1,079.54         | 1,395.26         | 1,618.42         | 1,616.63         | 5,709.85         |
| 007                             | 3,886.62         | 5,380.89         | 5,377.58         | 4,906.68         | 19,551.76        |
| 009                             | 15,444.05        | 14,784.88        | 14,751.79        | 16,592.82        | 61,573.54        |
| <b>PR - PUERTO RICO - Total</b> | <b>20,410.21</b> | <b>21,561.03</b> | <b>21,747.78</b> | <b>23,116.13</b> | <b>86,835.15</b> |

**STATE: RI - RHODE ISLAND**

| REGISTRANT ZIP CODE 3            | 1ST QUARTER      | 2ND QUARTER      | 3RD QUARTER      | 4TH QUARTER      | TOTAL GRAMS       |
|----------------------------------|------------------|------------------|------------------|------------------|-------------------|
| 028                              | 20,999.44        | 19,169.32        | 18,644.84        | 19,189.89        | 78,003.49         |
| 029                              | 23,272.38        | 28,473.31        | 18,480.00        | 20,921.80        | 91,147.50         |
| <b>RI - RHODE ISLAND - Total</b> | <b>44,271.82</b> | <b>47,642.63</b> | <b>37,124.84</b> | <b>40,111.69</b> | <b>169,150.99</b> |

**STATE: SC - SOUTH CAROLINA**

| REGISTRANT ZIP CODE 3              | 1ST QUARTER      | 2ND QUARTER      | 3RD QUARTER      | 4TH QUARTER      | TOTAL GRAMS       |
|------------------------------------|------------------|------------------|------------------|------------------|-------------------|
| 290                                | 937.33           | 851.47           | 760.24           | 784.66           | 3,333.70          |
| 291                                | 3,325.38         | 3,544.51         | 2,142.98         | 2,122.41         | 11,135.28         |
| 292                                | 2,149.24         | 2,231.89         | 2,563.53         | 1,738.71         | 8,683.37          |
| 293                                | 5,435.27         | 5,809.40         | 5,409.33         | 4,654.01         | 21,308.01         |
| 294                                | 8,224.63         | 6,063.76         | 9,316.16         | 6,560.69         | 30,165.25         |
| 295                                | 15,212.67        | 9,933.83         | 13,576.90        | 10,298.66        | 49,022.06         |
| 296                                | 11,897.40        | 11,835.95        | 12,612.29        | 9,175.56         | 45,521.20         |
| 297                                | 4,402.86         | 6,286.56         | 4,992.63         | 5,121.78         | 20,803.83         |
| 298                                | 1,521.37         | 1,552.68         | 1,499.01         | 988.76           | 5,561.83          |
| 299                                | 892.61           | 832.24           | 1,008.88         | 793.78           | 3,527.51          |
| <b>SC - SOUTH CAROLINA - Total</b> | <b>53,998.77</b> | <b>48,942.28</b> | <b>53,881.97</b> | <b>42,239.02</b> | <b>199,062.05</b> |

**STATE: SD - SOUTH DAKOTA**

| REGISTRANT ZIP CODE 3 | 1ST QUARTER | 2ND QUARTER | 3RD QUARTER | 4TH QUARTER | TOTAL GRAMS |
|-----------------------|-------------|-------------|-------------|-------------|-------------|
| 570                   | 333.88      | 305.80      | 308.75      | 295.51      | 1,243.93    |
| 571                   | 1,195.46    | 1,216.21    | 1,307.17    | 784.84      | 4,503.66    |

|                                  |                 |                 |                 |                 |                 |
|----------------------------------|-----------------|-----------------|-----------------|-----------------|-----------------|
| 572                              | 22.00           | 25.31           | 19.68           | 29.60           | 96.60           |
| 573                              | 78.71           | 81.39           | 87.20           | 85.42           | 332.72          |
| 574                              | 34.88           | 36.67           | 24.60           | 14.31           | 110.46          |
| 575                              | 30.95           | 27.73           | 30.41           | 32.65           | 121.73          |
| 576                              | 11.63           | 16.10           | 9.84            | 6.26            | 43.83           |
| 577                              | 311.07          | 285.05          | 269.12          | 272.70          | 1,137.95        |
| <b>SD - SOUTH DAKOTA - Total</b> | <b>2,018.57</b> | <b>1,994.24</b> | <b>2,056.76</b> | <b>1,521.28</b> | <b>7,590.86</b> |

**STATE: TN - TENNESSEE**

| REGISTRANT ZIP CODE 3         | 1ST QUARTER      | 2ND QUARTER      | 3RD QUARTER      | 4TH QUARTER      | TOTAL GRAMS       |
|-------------------------------|------------------|------------------|------------------|------------------|-------------------|
| 370                           | 1,385.34         | 1,305.56         | 1,161.38         | 1,002.53         | 4,854.80          |
| 371                           | 1,131.24         | 1,061.92         | 1,021.40         | 957.46           | 4,172.02          |
| 372                           | 5,568.02         | 4,798.19         | 6,511.11         | 5,898.80         | 22,776.12         |
| 373                           | 848.88           | 758.00           | 667.49           | 655.60           | 2,929.96          |
| 374                           | 7,220.22         | 7,532.91         | 7,608.93         | 6,983.83         | 29,345.89         |
| 376                           | 1,239.19         | 1,349.20         | 1,621.90         | 1,690.06         | 5,900.36          |
| 377                           | 149.81           | 143.55           | 122.98           | 117.61           | 533.96            |
| 378                           | 206.61           | 182.99           | 221.63           | 190.06           | 801.29            |
| 379                           | 11,077.23        | 11,070.35        | 11,120.88        | 9,530.46         | 42,798.92         |
| 380                           | 3,166.80         | 3,160.18         | 3,495.49         | 2,539.65         | 12,362.13         |
| 381                           | 9,286.64         | 8,686.59         | 8,717.27         | 8,931.75         | 35,622.25         |
| 382                           | 3,181.38         | 2,267.30         | 3,327.62         | 2,591.08         | 11,367.38         |
| 383                           | 3,896.63         | 2,620.59         | 4,020.60         | 2,986.31         | 13,524.13         |
| 384                           | 1,465.83         | 1,035.00         | 1,406.98         | 1,370.58         | 5,278.39          |
| 385                           | 180.22           | 201.78           | 158.76           | 151.60           | 692.36            |
| <b>TN - TENNESSEE - Total</b> | <b>50,004.04</b> | <b>46,174.12</b> | <b>51,184.43</b> | <b>45,597.37</b> | <b>192,959.96</b> |

**STATE: TX - TEXAS**

| REGISTRANT ZIP CODE 3 | 1ST QUARTER | 2ND QUARTER | 3RD QUARTER | 4TH QUARTER | TOTAL GRAMS |
|-----------------------|-------------|-------------|-------------|-------------|-------------|
| 750                   | 7,335.78    | 7,278.81    | 6,913.09    | 6,051.69    | 27,579.36   |
| 751                   | 1,045.20    | 963.72      | 1,165.40    | 970.69      | 4,145.01    |
| 752                   | 8,884.27    | 6,803.87    | 9,188.08    | 7,453.15    | 32,329.37   |
| 753                   | 24.24       | 19.14       | 14.04       | 21.91       | 79.33       |
| 754                   | 942.52      | 826.69      | 1,078.47    | 769.45      | 3,617.13    |
| 755                   | 284.42      | 232.10      | 215.10      | 194.08      | 925.70      |
| 756                   | 3,501.40    | 3,143.19    | 3,197.03    | 3,321.80    | 13,163.42   |
| 757                   | 4,695.78    | 5,086.90    | 4,603.75    | 4,314.41    | 18,700.83   |
| 758                   | 250.43      | 219.58      | 213.76      | 162.33      | 846.10      |
| 759                   | 1,323.44    | 1,303.59    | 1,357.88    | 1,577.45    | 5,562.36    |
| 760                   | 2,990.87    | 2,181.71    | 2,730.33    | 2,733.47    | 10,636.38   |
| 761                   | 11,037.16   | 10,777.88   | 10,130.69   | 10,531.11   | 42,476.84   |
| 762                   | 2,257.56    | 1,767.51    | 2,870.04    | 2,122.23    | 9,017.34    |

|                           |                   |                   |                   |                   |                   |
|---------------------------|-------------------|-------------------|-------------------|-------------------|-------------------|
| 763                       | 678.40            | 858.00            | 847.62            | 787.07            | 3,171.10          |
| 764                       | 214.92            | 196.77            | 173.07            | 174.41            | 759.17            |
| 765                       | 860.32            | 629.57            | 791.54            | 337.81            | 2,619.25          |
| 766                       | 199.00            | 192.12            | 160.10            | 173.96            | 725.18            |
| 767                       | 2,182.34          | 1,591.58          | 2,145.13          | 901.02            | 6,820.07          |
| 768                       | 272.97            | 236.57            | 230.13            | 182.90            | 922.57            |
| 769                       | 912.82            | 776.61            | 751.65            | 735.38            | 3,176.46          |
| 770                       | 13,894.22         | 12,176.36         | 13,167.16         | 11,551.07         | 50,788.81         |
| 772                       | 0                 | 429.31            | 429.31            | 429.31            | 1,287.94          |
| 773                       | 3,891.44          | 3,908.44          | 3,927.67          | 3,746.33          | 15,473.88         |
| 774                       | 853.97            | 875.80            | 810.24            | 777.50            | 3,317.51          |
| 775                       | 4,800.96          | 4,602.49          | 5,283.31          | 3,908.08          | 18,594.84         |
| 776                       | 1,001.10          | 957.01            | 1,620.47          | 992.87            | 4,571.46          |
| 777                       | 1,026.15          | 995.02            | 1,650.26          | 1,690.86          | 5,362.29          |
| 778                       | 218.50            | 311.70            | 323.59            | 356.06            | 1,209.85          |
| 779                       | 1,149.30          | 1,161.29          | 1,105.93          | 657.47            | 4,073.99          |
| 780                       | 1,882.09          | 1,434.80          | 1,780.57          | 1,767.60          | 6,865.06          |
| 781                       | 2,007.21          | 1,551.43          | 1,728.61          | 1,305.47          | 6,592.71          |
| 782                       | 29,435.15         | 25,817.93         | 31,151.68         | 28,702.28         | 115,107.04        |
| 783                       | 275.74            | 292.92            | 217.34            | 217.79            | 1,003.79          |
| 784                       | 6,731.70          | 6,203.11          | 5,790.26          | 6,863.98          | 25,589.05         |
| 785                       | 1,337.84          | 1,867.06          | 1,673.51          | 921.68            | 5,800.09          |
| 786                       | 2,255.86          | 1,506.97          | 1,642.39          | 1,489.80          | 6,895.02          |
| 787                       | 7,089.37          | 6,650.76          | 6,869.35          | 6,324.66          | 26,934.14         |
| 788                       | 67.53             | 75.22             | 68.24             | 80.94             | 291.93            |
| 789                       | 38.91             | 50.09             | 51.88             | 49.64             | 190.51            |
| 790                       | 241.94            | 242.65            | 225.66            | 212.87            | 923.11            |
| 791                       | 1,209.05          | 1,025.52          | 1,212.45          | 801.20            | 4,248.22          |
| 792                       | 49.19             | 58.14             | 50.09             | 65.74             | 223.15            |
| 793                       | 108.67            | 124.14            | 116.27            | 100.17            | 449.26            |
| 794                       | 1,472.36          | 768.92            | 1,914.46          | 1,797.92          | 5,953.66          |
| 795                       | 179.77            | 156.16            | 164.12            | 122.09            | 622.14            |
| 796                       | 430.65            | 341.39            | 381.91            | 374.40            | 1,528.35          |
| 797                       | 3,052.05          | 1,493.83          | 1,984.58          | 1,400.27          | 7,930.73          |
| 798                       | 13.42             | 8.94              | 8.94              | 8.94              | 40.25             |
| 799                       | 2,640.00          | 2,069.46          | 2,784.80          | 2,008.02          | 9,502.28          |
| <b>TX - TEXAS - Total</b> | <b>137,248.00</b> | <b>122,242.73</b> | <b>136,911.97</b> | <b>122,241.36</b> | <b>518,644.06</b> |

**STATE: UT - UTAH**

| REGISTRANT ZIP CODE 3 | 1ST QUARTER | 2ND QUARTER | 3RD QUARTER | 4TH QUARTER | TOTAL GRAMS |
|-----------------------|-------------|-------------|-------------|-------------|-------------|
| 840                   | 7,645.24    | 6,280.83    | 6,545.40    | 6,235.22    | 26,706.69   |

|                          |                  |                  |                  |                  |                  |
|--------------------------|------------------|------------------|------------------|------------------|------------------|
| 841                      | 13,777.52        | 10,791.65        | 12,833.66        | 7,721.36         | 45,124.18        |
| 843                      | 295.60           | 282.00           | 248.20           | 210.18           | 1,035.98         |
| 844                      | 2,753.05         | 2,574.44         | 2,527.04         | 1,660.01         | 9,514.54         |
| 845                      | 181.21           | 193.64           | 257.32           | 525.46           | 1,157.62         |
| 846                      | 1,264.41         | 681.26           | 1,753.74         | 670.17           | 4,369.59         |
| 847                      | 2,221.60         | 2,544.03         | 2,173.57         | 2,675.60         | 9,614.80         |
| <b>UT - UTAH - Total</b> | <b>28,138.63</b> | <b>23,347.86</b> | <b>26,338.92</b> | <b>19,698.00</b> | <b>97,523.41</b> |

**STATE: VA - VIRGINIA**

| REGISTRANT ZIP CODE 3        | 1ST QUARTER      | 2ND QUARTER      | 3RD QUARTER      | 4TH QUARTER      | TOTAL GRAMS       |
|------------------------------|------------------|------------------|------------------|------------------|-------------------|
| 201                          | 3,662.75         | 2,496.72         | 3,769.18         | 1,964.91         | 11,893.55         |
| 220                          | 1,549.46         | 1,847.11         | 1,393.92         | 1,432.83         | 6,223.32          |
| 221                          | 414.46           | 408.65           | 346.04           | 361.61           | 1,530.77          |
| 222                          | 83.63            | 101.78           | 98.21            | 85.33            | 368.94            |
| 223                          | 668.12           | 687.79           | 251.68           | 688.51           | 2,296.10          |
| 224                          | 4,351.79         | 4,000.29         | 3,221.63         | 3,586.99         | 15,160.71         |
| 225                          | 137.11           | 136.84           | 120.39           | 118.96           | 513.30            |
| 226                          | 4,900.24         | 5,786.95         | 5,530.52         | 4,584.87         | 20,802.58         |
| 227                          | 152.32           | 138.18           | 159.92           | 131.92           | 582.34            |
| 228                          | 3,985.71         | 2,200.94         | 3,931.78         | 2,148.38         | 12,266.81         |
| 229                          | 3,951.91         | 4,589.17         | 4,501.07         | 3,934.64         | 16,976.79         |
| 230                          | 3,029.60         | 3,357.49         | 3,710.24         | 3,241.84         | 13,339.17         |
| 231                          | 1,349.02         | 1,178.82         | 1,450.90         | 1,310.74         | 5,289.48          |
| 232                          | 13,581.37        | 14,432.58        | 14,751.34        | 14,783.27        | 57,548.56         |
| 233                          | 3,435.66         | 3,861.30         | 3,825.97         | 3,096.41         | 14,219.35         |
| 234                          | 5,756.18         | 6,706.30         | 6,095.87         | 5,696.08         | 24,254.43         |
| 235                          | 1,418.79         | 1,370.04         | 1,899.08         | 1,404.21         | 6,092.12          |
| 236                          | 5,339.93         | 5,263.01         | 4,978.50         | 5,240.83         | 20,822.26         |
| 237                          | 1,366.11         | 801.29           | 746.20           | 735.64           | 3,649.24          |
| 238                          | 2,109.00         | 1,833.07         | 2,081.81         | 1,421.02         | 7,444.90          |
| 239                          | 162.42           | 137.74           | 142.93           | 122.98           | 566.07            |
| 240                          | 4,970.40         | 3,762.11         | 4,569.85         | 4,059.32         | 17,361.69         |
| 241                          | 898.07           | 811.22           | 778.40           | 794.50           | 3,282.18          |
| 242                          | 615.35           | 538.52           | 562.13           | 550.50           | 2,266.50          |
| 243                          | 6,322.78         | 5,863.51         | 4,817.95         | 5,096.56         | 22,100.80         |
| 244                          | 493.80           | 561.41           | 888.23           | 722.23           | 2,665.67          |
| 245                          | 4,068.00         | 3,112.06         | 3,716.59         | 3,829.82         | 14,726.47         |
| 246                          | 4,213.07         | 3,225.12         | 4,238.38         | 2,403.25         | 14,079.82         |
| <b>VA - VIRGINIA - Total</b> | <b>82,987.04</b> | <b>79,210.03</b> | <b>82,578.70</b> | <b>73,548.15</b> | <b>318,323.92</b> |

**STATE: VI - VIRGIN ISLANDS**

| REGISTRANT ZIP CODE 3 | 1ST QUARTER | 2ND QUARTER | 3RD QUARTER | 4TH QUARTER | TOTAL GRAMS |
|-----------------------|-------------|-------------|-------------|-------------|-------------|
|-----------------------|-------------|-------------|-------------|-------------|-------------|



|                                    |             |             |             |               |               |
|------------------------------------|-------------|-------------|-------------|---------------|---------------|
| 008                                | 1.79        | 3.58        | 9.84        | 549.16        | 564.37        |
| <b>VI - VIRGIN ISLANDS - Total</b> | <b>1.79</b> | <b>3.58</b> | <b>9.84</b> | <b>549.16</b> | <b>564.37</b> |

**STATE: VT - VERMONT**

| REGISTRANT ZIP CODE 3       | 1ST QUARTER      | 2ND QUARTER      | 3RD QUARTER      | 4TH QUARTER      | TOTAL GRAMS      |
|-----------------------------|------------------|------------------|------------------|------------------|------------------|
| 050                         | 426.36           | 438.70           | 426.27           | 326.99           | 1,618.33         |
| 051                         | 242.83           | 207.50           | 223.15           | 167.25           | 840.74           |
| 052                         | 147.13           | 151.60           | 148.38           | 141.49           | 588.60           |
| 053                         | 2,041.47         | 1,813.40         | 2,400.57         | 1,465.47         | 7,720.91         |
| 054                         | 7,531.03         | 5,754.84         | 7,662.06         | 7,295.89         | 28,243.81        |
| 056                         | 2,672.47         | 1,780.30         | 2,433.22         | 1,952.92         | 8,838.91         |
| 057                         | 2,489.03         | 2,272.85         | 2,233.76         | 2,218.56         | 9,214.20         |
| 058                         | 4,534.25         | 3,176.55         | 4,102.34         | 3,023.43         | 14,836.58        |
| <b>VT - VERMONT - Total</b> | <b>20,084.56</b> | <b>15,595.74</b> | <b>19,629.75</b> | <b>16,592.01</b> | <b>71,902.07</b> |

**STATE: WA - WASHINGTON**

| REGISTRANT ZIP CODE 3          | 1ST QUARTER      | 2ND QUARTER      | 3RD QUARTER       | 4TH QUARTER      | TOTAL GRAMS       |
|--------------------------------|------------------|------------------|-------------------|------------------|-------------------|
| 980                            | 16,519.75        | 13,546.58        | 16,695.85         | 15,512.12        | 62,274.30         |
| 981                            | 21,197.91        | 17,368.35        | 21,450.66         | 20,081.96        | 80,098.89         |
| 982                            | 13,637.27        | 14,161.12        | 14,837.65         | 11,509.32        | 54,145.37         |
| 983                            | 3,222.88         | 2,994.00         | 2,759.76          | 2,712.98         | 11,689.63         |
| 984                            | 13,015.76        | 11,590.71        | 12,362.84         | 11,058.54        | 48,027.85         |
| 985                            | 7,186.15         | 3,456.05         | 8,615.04          | 9,109.46         | 28,366.70         |
| 986                            | 7,565.64         | 6,455.33         | 7,983.68          | 6,701.11         | 28,705.77         |
| 988                            | 655.60           | 588.43           | 550.86            | 517.05           | 2,311.93          |
| 989                            | 1,735.58         | 2,057.03         | 2,046.92          | 1,288.38         | 7,127.92          |
| 990                            | 284.60           | 249.09           | 249.98            | 242.38           | 1,026.06          |
| 991                            | 513.39           | 459.36           | 466.25            | 402.03           | 1,841.03          |
| 992                            | 11,747.23        | 9,892.96         | 12,024.67         | 8,515.94         | 42,180.80         |
| 993                            | 833.13           | 731.98           | 643.07            | 606.31           | 2,814.50          |
| 994                            | 262.95           | 229.68           | 183.71            | 201.78           | 878.12            |
| <b>WA - WASHINGTON - Total</b> | <b>98,377.83</b> | <b>83,780.68</b> | <b>100,870.97</b> | <b>88,459.38</b> | <b>371,488.86</b> |

**STATE: WI - WISCONSIN**

| REGISTRANT ZIP CODE 3 | 1ST QUARTER | 2ND QUARTER | 3RD QUARTER | 4TH QUARTER | TOTAL GRAMS |
|-----------------------|-------------|-------------|-------------|-------------|-------------|
| 530                   | 3,380.21    | 2,339.75    | 2,845.00    | 2,054.88    | 10,619.84   |
| 531                   | 4,578.79    | 3,956.02    | 4,441.32    | 3,187.82    | 16,163.95   |
| 532                   | 14,409.05   | 14,252.98   | 16,922.14   | 8,353.70    | 53,937.87   |
| 534                   | 3,347.38    | 2,523.46    | 3,311.96    | 2,142.54    | 11,325.34   |
| 535                   | 3,670.98    | 2,972.09    | 3,509.36    | 2,298.07    | 12,450.50   |
| 537                   | 10,301.07   | 9,587.25    | 10,241.07   | 8,528.04    | 38,657.43   |
| 538                   | 105.99      | 98.83       | 102.41      | 82.28       | 389.51      |
| 539                   | 443.18      | 393.09      | 372.07      | 350.60      | 1,558.94    |

|                               |                  |                  |                  |                  |                   |
|-------------------------------|------------------|------------------|------------------|------------------|-------------------|
| 540                           | 229.68           | 198.11           | 222.53           | 196.32           | 846.64            |
| 541                           | 213.31           | 165.02           | 179.33           | 159.56           | 717.22            |
| 542                           | 84.97            | 72.45            | 79.15            | 59.48            | 296.05            |
| 543                           | 4,448.92         | 3,759.79         | 4,403.67         | 2,175.99         | 14,788.37         |
| 544                           | 2,001.49         | 1,923.14         | 2,352.54         | 1,479.25         | 7,756.42          |
| 545                           | 48.74            | 54.11            | 46.96            | 49.64            | 199.45            |
| 546                           | 3,313.22         | 4,306.18         | 3,355.52         | 3,280.39         | 14,255.30         |
| 547                           | 1,985.12         | 2,376.87         | 2,647.69         | 2,232.51         | 9,242.19          |
| 548                           | 300.25           | 317.96           | 307.85           | 280.39           | 1,206.46          |
| 549                           | 8,653.23         | 9,129.50         | 7,800.60         | 6,971.31         | 32,554.64         |
| <b>WI - WISCONSIN - Total</b> | <b>61,515.58</b> | <b>58,426.59</b> | <b>63,141.16</b> | <b>43,882.77</b> | <b>226,966.10</b> |

**STATE: WV - WEST VIRGINIA**

| REGISTRANT ZIP CODE 3             | 1ST QUARTER      | 2ND QUARTER      | 3RD QUARTER      | 4TH QUARTER      | TOTAL GRAMS      |
|-----------------------------------|------------------|------------------|------------------|------------------|------------------|
| 247                               | 29.07            | 37.56            | 33.09            | 44.27            | 144.00           |
| 248                               | 17.89            | 19.68            | 16.55            | 16.10            | 70.21            |
| 249                               | 32.20            | 28.17            | 29.07            | 23.25            | 112.69           |
| 250                               | 28.62            | 29.07            | 30.41            | 26.65            | 114.75           |
| 251                               | 33.99            | 31.75            | 27.28            | 31.75            | 124.77           |
| 252                               | 42.93            | 20.12            | 21.47            | 20.57            | 105.09           |
| 253                               | 2,252.01         | 1,236.60         | 2,111.23         | 1,871.35         | 7,471.19         |
| 254                               | 3,481.00         | 3,338.80         | 3,224.31         | 3,121.46         | 13,165.57        |
| 255                               | 92.30            | 93.46            | 102.86           | 67.08            | 355.70           |
| 256                               | 2,692.14         | 1,938.16         | 2,701.54         | 1,798.19         | 9,130.04         |
| 257                               | 5,301.11         | 5,318.46         | 5,516.93         | 3,414.46         | 19,550.96        |
| 258                               | 3,148.74         | 2,712.72         | 3,502.02         | 2,314.71         | 11,678.18        |
| 259                               | 38.46            | 31.30            | 41.14            | 47.40            | 158.31           |
| 260                               | 1,260.21         | 1,236.51         | 1,434.98         | 889.84           | 4,821.53         |
| 261                               | 1,090.72         | 939.12           | 1,228.91         | 650.68           | 3,909.42         |
| 262                               | 107.33           | 110.01           | 80.05            | 79.15            | 376.54           |
| 263                               | 1,041.98         | 1,462.34         | 1,228.37         | 1,009.96         | 4,742.65         |
| 264                               | 62.61            | 55.01            | 55.27            | 52.32            | 225.21           |
| 265                               | 1,812.59         | 1,392.67         | 1,837.10         | 1,361.01         | 6,403.37         |
| 266                               | 15.20            | 16.55            | 18.78            | 17.89            | 68.42            |
| 267                               | 83.63            | 76.47            | 66.63            | 70.21            | 296.94           |
| 268                               | 46.33            | 37.12            | 28.62            | 31.30            | 143.37           |
| <b>WV - WEST VIRGINIA - Total</b> | <b>22,711.05</b> | <b>20,161.65</b> | <b>23,336.60</b> | <b>16,959.61</b> | <b>83,168.91</b> |

**STATE: WY - WYOMING**

| REGISTRANT ZIP CODE 3 | 1ST QUARTER | 2ND QUARTER | 3RD QUARTER | 4TH QUARTER | TOTAL GRAMS |
|-----------------------|-------------|-------------|-------------|-------------|-------------|
| 820                   | 172.62      | 200.61      | 138.18      | 151.15      | 662.57      |
| 822                   | 30.23       | 37.56       | 25.94       | 27.28       | 121.01      |

|                             |                 |               |               |               |                 |
|-----------------------------|-----------------|---------------|---------------|---------------|-----------------|
| 823                         | 17.89           | 13.42         | 9.39          | 17.44         | 58.14           |
| 824                         | 70.21           | 47.40         | 47.40         | 46.06         | 211.08          |
| 825                         | 130.58          | 88.55         | 91.68         | 75.58         | 386.38          |
| 826                         | 218.68          | 201.24        | 207.95        | 215.55        | 843.42          |
| 827                         | 42.93           | 39.35         | 34.88         | 31.75         | 148.92          |
| 828                         | 65.29           | 53.66         | 56.35         | 61.27         | 236.57          |
| 829                         | 247.75          | 189.61        | 210.63        | 216.00        | 863.99          |
| 830                         | 29.07           | 40.70         | 29.52         | 29.52         | 128.79          |
| 831                         | 23.25           | 19.68         | 25.94         | 27.73         | 96.60           |
| <b>WY - WYOMING - Total</b> | <b>1,048.51</b> | <b>931.79</b> | <b>877.85</b> | <b>899.32</b> | <b>3,757.46</b> |

**DRUG: 9300 - MORPHINE****STATE: AK - ALASKA**

| REGISTRANT ZIP CODE 3      | 1ST QUARTER      | 2ND QUARTER      | 3RD QUARTER      | 4TH QUARTER     | TOTAL GRAMS      |
|----------------------------|------------------|------------------|------------------|-----------------|------------------|
| 995                        | 5,079.76         | 5,071.05         | 4,859.17         | 4,367.73        | 19,377.71        |
| 996                        | 3,891.86         | 3,700.74         | 3,681.76         | 3,130.08        | 14,404.44        |
| 997                        | 1,235.70         | 1,107.36         | 1,238.71         | 1,026.64        | 4,608.40         |
| 998                        | 416.58           | 382.18           | 391.58           | 434.17          | 1,624.51         |
| 999                        | 175.56           | 223.07           | 167.94           | 158.15          | 724.71           |
| <b>AK - ALASKA - Total</b> | <b>10,799.45</b> | <b>10,484.39</b> | <b>10,339.16</b> | <b>9,116.76</b> | <b>40,739.77</b> |

**STATE: AL - ALABAMA**

| REGISTRANT ZIP CODE 3 | 1ST QUARTER | 2ND QUARTER | 3RD QUARTER | 4TH QUARTER | TOTAL GRAMS |
|-----------------------|-------------|-------------|-------------|-------------|-------------|
| 350                   | 7,364.11    | 7,050.50    | 6,898.20    | 6,702.44    | 28,015.25   |
| 351                   | 3,949.06    | 3,905.48    | 3,656.05    | 3,459.88    | 14,970.47   |
| 352                   | 6,104.91    | 5,792.83    | 5,494.67    | 5,607.54    | 22,999.95   |
| 354                   | 4,092.91    | 3,571.68    | 3,677.79    | 3,550.74    | 14,893.11   |
| 355                   | 2,088.64    | 2,154.52    | 2,020.64    | 1,920.68    | 8,184.48    |
| 356                   | 4,230.36    | 4,248.64    | 4,102.53    | 4,095.09    | 16,676.62   |
| 357                   | 2,288.95    | 2,207.52    | 2,320.02    | 2,181.20    | 8,997.70    |
| 358                   | 3,836.36    | 3,518.64    | 3,399.66    | 3,294.09    | 14,048.75   |
| 359                   | 5,473.78    | 5,348.69    | 5,235.26    | 4,870.72    | 20,928.44   |
| 360                   | 3,428.21    | 3,077.90    | 2,673.15    | 2,858.48    | 12,037.73   |
| 361                   | 2,547.69    | 2,450.68    | 2,318.79    | 2,504.89    | 9,822.05    |
| 362                   | 2,251.04    | 2,098.83    | 1,922.27    | 1,971.67    | 8,243.80    |
| 363                   | 1,998.43    | 1,888.58    | 1,829.22    | 1,811.60    | 7,527.84    |
| 364                   | 1,260.03    | 976.22      | 930.73      | 956.90      | 4,123.89    |
| 365                   | 4,418.08    | 4,137.85    | 4,040.33    | 4,152.88    | 16,749.13   |
| 366                   | 4,112.19    | 4,042.75    | 3,607.56    | 3,756.51    | 15,519.02   |
| 367                   | 588.05      | 513.38      | 565.27      | 587.30      | 2,254.00    |
| 368                   | 3,528.27    | 3,391.80    | 3,383.53    | 3,449.13    | 13,752.74   |
| 369                   | 188.45      | 136.18      | 113.21      | 133.77      | 571.61      |

|                             |                  |                  |                  |                  |                   |
|-----------------------------|------------------|------------------|------------------|------------------|-------------------|
| <b>AL - ALABAMA - Total</b> | <b>63,749.51</b> | <b>60,512.68</b> | <b>58,188.90</b> | <b>57,865.49</b> | <b>240,316.58</b> |
|-----------------------------|------------------|------------------|------------------|------------------|-------------------|

**STATE: AR - ARKANSAS**

| REGISTRANT ZIP CODE 3        | 1ST QUARTER      | 2ND QUARTER      | 3RD QUARTER      | 4TH QUARTER      | TOTAL GRAMS       |
|------------------------------|------------------|------------------|------------------|------------------|-------------------|
| 716                          | 1,176.83         | 1,186.71         | 1,015.22         | 1,010.10         | 4,388.86          |
| 717                          | 1,220.78         | 1,371.91         | 1,164.77         | 1,092.09         | 4,849.55          |
| 718                          | 919.69           | 794.56           | 787.23           | 732.82           | 3,234.30          |
| 719                          | 2,487.88         | 2,245.03         | 2,222.00         | 2,156.47         | 9,111.38          |
| 720                          | 4,435.47         | 4,336.62         | 3,884.36         | 3,619.90         | 16,276.35         |
| 721                          | 4,900.53         | 4,741.96         | 4,233.75         | 4,074.54         | 17,950.77         |
| 722                          | 2,804.70         | 2,781.86         | 2,187.94         | 2,278.42         | 10,052.92         |
| 723                          | 1,132.62         | 1,022.33         | 929.84           | 960.01           | 4,044.80          |
| 724                          | 2,892.25         | 2,495.17         | 2,384.80         | 2,474.46         | 10,246.68         |
| 725                          | 1,595.68         | 1,377.61         | 1,318.06         | 1,237.47         | 5,528.81          |
| 726                          | 2,610.17         | 2,105.60         | 1,976.38         | 1,975.60         | 8,667.75          |
| 727                          | 7,441.59         | 6,706.68         | 6,489.23         | 5,870.76         | 26,508.26         |
| 728                          | 1,453.16         | 1,470.16         | 1,353.37         | 1,332.52         | 5,609.22          |
| 729                          | 3,831.08         | 3,455.53         | 3,193.90         | 2,866.12         | 13,346.64         |
| <b>AR - ARKANSAS - Total</b> | <b>38,902.44</b> | <b>36,091.73</b> | <b>33,140.85</b> | <b>31,681.30</b> | <b>139,816.32</b> |

**STATE: AS - AMERICAN SAMOA**

| REGISTRANT ZIP CODE 3              | 1ST QUARTER | 2ND QUARTER  | 3RD QUARTER  | 4TH QUARTER | TOTAL GRAMS  |
|------------------------------------|-------------|--------------|--------------|-------------|--------------|
| 967                                | 6.77        | 25.12        | 12.18        | 4.51        | 48.58        |
| <b>AS - AMERICAN SAMOA - Total</b> | <b>6.77</b> | <b>25.12</b> | <b>12.18</b> | <b>4.51</b> | <b>48.58</b> |

**STATE: AZ - ARIZONA**

| REGISTRANT ZIP CODE 3       | 1ST QUARTER       | 2ND QUARTER       | 3RD QUARTER       | 4TH QUARTER       | TOTAL GRAMS       |
|-----------------------------|-------------------|-------------------|-------------------|-------------------|-------------------|
| 850                         | 22,052.89         | 20,125.97         | 18,673.63         | 18,146.75         | 78,999.24         |
| 851                         | 5,498.82          | 4,861.45          | 4,481.87          | 4,396.16          | 19,238.29         |
| 852                         | 30,427.31         | 27,387.48         | 26,838.44         | 22,418.06         | 107,071.31        |
| 853                         | 19,826.86         | 17,788.81         | 16,105.89         | 16,545.68         | 70,267.24         |
| 855                         | 3,011.93          | 2,753.63          | 2,705.32          | 2,453.20          | 10,924.08         |
| 856                         | 5,560.06          | 5,472.12          | 5,099.09          | 4,672.12          | 20,803.40         |
| 857                         | 30,978.76         | 28,642.72         | 26,887.67         | 25,275.45         | 111,784.60        |
| 859                         | 3,200.55          | 2,761.40          | 2,759.21          | 2,493.37          | 11,214.53         |
| 860                         | 2,594.74          | 2,266.26          | 2,232.36          | 1,883.88          | 8,977.23          |
| 863                         | 6,648.76          | 6,661.55          | 5,876.54          | 5,545.75          | 24,732.60         |
| 864                         | 6,776.97          | 5,759.08          | 5,115.12          | 5,045.56          | 22,696.73         |
| 865                         | 164.11            | 166.65            | 135.08            | 127.09            | 592.93            |
| <b>AZ - ARIZONA - Total</b> | <b>136,741.78</b> | <b>124,647.12</b> | <b>116,910.22</b> | <b>109,003.06</b> | <b>487,302.18</b> |

**STATE: CA - CALIFORNIA**

| REGISTRANT ZIP CODE 3 | 1ST QUARTER | 2ND QUARTER | 3RD QUARTER | 4TH QUARTER | TOTAL GRAMS |
|-----------------------|-------------|-------------|-------------|-------------|-------------|
| 900                   | 5,966.28    | 5,901.25    | 5,983.42    | 6,285.96    | 24,136.91   |

|     |           |           |           |           |            |
|-----|-----------|-----------|-----------|-----------|------------|
| 902 | 4,763.52  | 4,407.27  | 4,079.15  | 3,957.72  | 17,207.66  |
| 903 | 245.05    | 187.17    | 204.02    | 229.31    | 865.55     |
| 904 | 1,309.03  | 1,098.17  | 1,074.38  | 1,023.07  | 4,504.64   |
| 905 | 2,117.46  | 2,184.57  | 1,832.23  | 1,920.27  | 8,054.53   |
| 906 | 6,856.20  | 6,734.67  | 6,288.01  | 5,569.37  | 25,448.25  |
| 907 | 4,229.22  | 4,173.71  | 3,660.05  | 3,598.10  | 15,661.08  |
| 908 | 4,429.18  | 4,158.32  | 4,102.90  | 4,362.58  | 17,052.98  |
| 910 | 2,469.78  | 2,158.77  | 2,208.41  | 1,987.56  | 8,824.53   |
| 911 | 1,438.90  | 1,297.64  | 1,265.56  | 1,248.88  | 5,250.98   |
| 912 | 3,269.39  | 2,939.82  | 2,914.87  | 2,640.55  | 11,764.63  |
| 913 | 11,083.63 | 10,563.41 | 10,492.46 | 9,855.89  | 41,995.40  |
| 914 | 4,177.54  | 3,859.55  | 3,769.80  | 3,779.85  | 15,586.75  |
| 915 | 888.68    | 929.47    | 892.29    | 715.03    | 3,425.47   |
| 916 | 349.47    | 387.52    | 434.58    | 391.79    | 1,563.36   |
| 917 | 14,378.29 | 13,840.06 | 12,851.40 | 13,061.00 | 54,130.75  |
| 918 | 218.80    | 181.94    | 157.04    | 126.75    | 684.53     |
| 919 | 4,004.22  | 3,824.20  | 3,594.70  | 3,319.53  | 14,742.65  |
| 920 | 20,135.24 | 18,934.70 | 16,892.86 | 16,091.60 | 72,054.41  |
| 921 | 13,590.40 | 12,342.07 | 11,478.38 | 11,066.75 | 48,477.60  |
| 922 | 9,179.86  | 8,254.64  | 8,560.35  | 8,000.92  | 33,995.76  |
| 923 | 17,509.40 | 15,947.86 | 15,608.01 | 14,912.50 | 63,977.77  |
| 924 | 2,009.79  | 1,978.94  | 1,506.30  | 1,729.36  | 7,224.40   |
| 925 | 12,632.26 | 12,355.72 | 11,841.44 | 11,887.94 | 48,717.37  |
| 926 | 11,222.53 | 10,670.26 | 9,914.03  | 9,978.72  | 41,785.54  |
| 927 | 3,028.70  | 2,817.43  | 2,632.68  | 2,670.96  | 11,149.78  |
| 928 | 10,811.78 | 10,258.28 | 10,175.17 | 9,616.37  | 40,861.60  |
| 930 | 6,357.76  | 5,974.64  | 6,082.02  | 5,466.47  | 23,880.89  |
| 931 | 1,056.76  | 728.28    | 747.98    | 764.81    | 3,297.84   |
| 932 | 6,380.65  | 6,272.64  | 6,102.84  | 5,667.84  | 24,423.97  |
| 933 | 7,699.65  | 7,423.13  | 7,198.23  | 6,682.05  | 29,003.07  |
| 934 | 7,146.34  | 7,007.65  | 6,246.62  | 6,505.49  | 26,906.11  |
| 935 | 9,249.91  | 8,942.96  | 8,201.86  | 7,482.04  | 33,876.78  |
| 936 | 5,989.50  | 5,934.19  | 5,288.18  | 5,203.61  | 22,415.47  |
| 937 | 8,345.03  | 7,771.14  | 7,721.96  | 7,517.98  | 31,356.12  |
| 939 | 3,131.99  | 2,769.39  | 2,699.79  | 2,460.63  | 11,061.80  |
| 940 | 6,226.90  | 6,078.17  | 5,771.45  | 6,696.88  | 24,773.41  |
| 941 | 11,320.06 | 11,246.79 | 10,225.22 | 10,686.41 | 43,478.46  |
| 943 | 1,663.34  | 1,467.72  | 1,342.52  | 1,328.38  | 5,801.96   |
| 944 | 1,496.43  | 1,523.21  | 1,214.39  | 1,007.40  | 5,241.42   |
| 945 | 32,522.84 | 28,609.39 | 29,252.11 | 27,857.96 | 118,242.30 |

|                                |                   |                   |                   |                   |                     |
|--------------------------------|-------------------|-------------------|-------------------|-------------------|---------------------|
| 946                            | 3,583.00          | 3,003.51          | 2,789.39          | 2,965.47          | 12,341.38           |
| 947                            | 721.22            | 532.39            | 488.21            | 667.51            | 2,409.32            |
| 948                            | 1,078.47          | 964.42            | 1,018.47          | 1,029.36          | 4,090.71            |
| 949                            | 5,639.70          | 5,014.03          | 4,679.94          | 4,069.60          | 19,403.26           |
| 950                            | 5,373.48          | 4,851.92          | 4,656.81          | 4,623.82          | 19,506.03           |
| 951                            | 3,150.79          | 3,198.45          | 2,725.28          | 2,926.55          | 12,001.07           |
| 952                            | 7,032.70          | 6,822.00          | 6,185.16          | 6,109.54          | 26,149.40           |
| 953                            | 18,557.75         | 18,668.24         | 16,926.37         | 16,236.49         | 70,388.84           |
| 954                            | 10,602.57         | 9,821.68          | 9,857.97          | 8,598.01          | 38,880.23           |
| 955                            | 4,342.85          | 4,093.89          | 4,222.26          | 3,728.09          | 16,387.09           |
| 956                            | 22,139.07         | 20,798.78         | 19,798.86         | 20,167.15         | 82,903.85           |
| 957                            | 2,562.70          | 2,446.35          | 2,355.98          | 2,365.31          | 9,730.34            |
| 958                            | 14,422.37         | 13,035.77         | 12,802.28         | 11,571.45         | 51,831.87           |
| 959                            | 10,930.72         | 9,591.85          | 9,443.66          | 8,843.96          | 38,810.18           |
| 960                            | 7,602.74          | 6,856.22          | 6,281.22          | 5,947.96          | 26,688.14           |
| 961                            | 1,459.64          | 1,448.76          | 1,368.10          | 1,320.31          | 5,596.80            |
| <b>CA - CALIFORNIA - Total</b> | <b>400,101.55</b> | <b>375,284.98</b> | <b>358,109.62</b> | <b>346,526.82</b> | <b>1,480,022.97</b> |

**STATE: CO - COLORADO**

| REGISTRANT ZIP CODE 3        | 1ST QUARTER      | 2ND QUARTER      | 3RD QUARTER      | 4TH QUARTER      | TOTAL GRAMS       |
|------------------------------|------------------|------------------|------------------|------------------|-------------------|
| 800                          | 11,877.90        | 10,618.19        | 12,794.11        | 12,863.88        | 48,154.08         |
| 801                          | 9,062.17         | 8,703.57         | 8,602.30         | 8,243.72         | 34,611.76         |
| 802                          | 13,779.66        | 12,991.16        | 10,701.98        | 9,032.78         | 46,505.57         |
| 803                          | 1,001.93         | 853.36           | 813.69           | 848.33           | 3,517.31          |
| 804                          | 3,005.61         | 2,549.57         | 2,656.95         | 2,539.45         | 10,751.58         |
| 805                          | 6,674.91         | 6,239.58         | 5,901.46         | 5,319.85         | 24,135.79         |
| 806                          | 2,808.76         | 2,876.26         | 2,545.20         | 2,461.57         | 10,691.79         |
| 807                          | 1,113.68         | 1,003.29         | 911.46           | 943.37           | 3,971.80          |
| 808                          | 1,294.24         | 1,311.60         | 1,353.08         | 1,157.92         | 5,116.85          |
| 809                          | 8,239.41         | 7,425.48         | 6,692.28         | 6,529.82         | 28,886.99         |
| 810                          | 4,250.99         | 3,827.04         | 3,973.70         | 3,755.12         | 15,806.85         |
| 811                          | 585.86           | 558.16           | 566.57           | 473.25           | 2,183.83          |
| 812                          | 1,238.81         | 1,127.33         | 1,030.28         | 1,000.56         | 4,396.98          |
| 813                          | 531.60           | 521.54           | 483.36           | 483.72           | 2,020.22          |
| 814                          | 703.96           | 620.70           | 632.51           | 466.90           | 2,424.08          |
| 815                          | 2,148.74         | 1,981.41         | 1,820.40         | 1,795.91         | 7,746.46          |
| 816                          | 1,148.12         | 1,045.65         | 1,052.47         | 1,034.49         | 4,280.73          |
| <b>CO - COLORADO - Total</b> | <b>69,466.35</b> | <b>64,253.88</b> | <b>62,531.80</b> | <b>58,950.62</b> | <b>255,202.66</b> |

**STATE: CT - CONNECTICUT**

| REGISTRANT ZIP CODE 3 | 1ST QUARTER | 2ND QUARTER | 3RD QUARTER | 4TH QUARTER | TOTAL GRAMS |
|-----------------------|-------------|-------------|-------------|-------------|-------------|
| 060                   | 5,538.72    | 5,520.16    | 5,091.02    | 5,239.78    | 21,389.68   |

|                                 |                  |                  |                  |                  |                   |
|---------------------------------|------------------|------------------|------------------|------------------|-------------------|
| 061                             | 1,666.04         | 1,770.44         | 1,588.69         | 1,528.99         | 6,554.16          |
| 062                             | 1,407.53         | 1,371.52         | 1,452.65         | 1,429.71         | 5,661.40          |
| 063                             | 1,924.70         | 1,892.78         | 1,718.27         | 1,751.52         | 7,287.26          |
| 064                             | 9,655.75         | 9,166.34         | 9,243.27         | 9,366.10         | 37,431.47         |
| 065                             | 3,877.42         | 3,748.33         | 3,264.21         | 3,150.28         | 14,040.23         |
| 066                             | 1,367.36         | 1,283.57         | 1,147.08         | 1,146.76         | 4,944.78          |
| 067                             | 3,058.45         | 2,960.35         | 2,764.50         | 2,510.37         | 11,293.67         |
| 068                             | 4,111.23         | 3,351.68         | 3,213.62         | 2,861.52         | 13,538.06         |
| 069                             | 241.65           | 294.07           | 248.54           | 205.90           | 990.16            |
| <b>CT - CONNECTICUT - Total</b> | <b>32,848.85</b> | <b>31,359.24</b> | <b>29,731.85</b> | <b>29,190.94</b> | <b>123,130.87</b> |

**STATE: DC - DISTRICT OF COLUMBIA**

| REGISTRANT ZIP CODE 3                    | 1ST QUARTER     | 2ND QUARTER     | 3RD QUARTER     | 4TH QUARTER     | TOTAL GRAMS      |
|------------------------------------------|-----------------|-----------------|-----------------|-----------------|------------------|
| 200                                      | 2,495.26        | 2,274.50        | 2,202.83        | 1,918.98        | 8,891.58         |
| 203                                      | 18.05           | 0               | 20.30           | 12.48           | 50.84            |
| 204                                      | 1,174.62        | 454.77          | 766.06          | 537.08          | 2,932.54         |
| 205                                      | 0               | 0.38            | 0               | 0.38            | 0.75             |
| <b>DC - DISTRICT OF COLUMBIA - Total</b> | <b>3,687.93</b> | <b>2,729.65</b> | <b>2,989.20</b> | <b>2,468.92</b> | <b>11,875.70</b> |

**STATE: DE - DELAWARE**

| REGISTRANT ZIP CODE 3        | 1ST QUARTER      | 2ND QUARTER      | 3RD QUARTER      | 4TH QUARTER      | TOTAL GRAMS      |
|------------------------------|------------------|------------------|------------------|------------------|------------------|
| 197                          | 7,930.05         | 7,376.98         | 6,820.55         | 6,275.44         | 28,403.03        |
| 198                          | 4,524.30         | 4,030.98         | 3,835.72         | 3,712.26         | 16,103.26        |
| 199                          | 7,571.22         | 7,278.16         | 6,868.71         | 6,603.68         | 28,321.76        |
| <b>DE - DELAWARE - Total</b> | <b>20,025.57</b> | <b>18,686.12</b> | <b>17,524.99</b> | <b>16,591.38</b> | <b>72,828.05</b> |

**STATE: FL - FLORIDA**

| REGISTRANT ZIP CODE 3 | 1ST QUARTER | 2ND QUARTER | 3RD QUARTER | 4TH QUARTER | TOTAL GRAMS |
|-----------------------|-------------|-------------|-------------|-------------|-------------|
| 320                   | 11,994.79   | 11,304.11   | 9,971.16    | 9,868.91    | 43,138.97   |
| 321                   | 14,539.81   | 13,467.90   | 12,368.21   | 12,777.10   | 53,153.03   |
| 322                   | 20,245.34   | 19,538.56   | 18,057.95   | 16,410.71   | 74,252.55   |
| 323                   | 4,662.70    | 4,768.66    | 4,316.76    | 4,523.30    | 18,271.42   |
| 324                   | 4,141.15    | 4,220.88    | 4,368.09    | 3,973.79    | 16,703.92   |
| 325                   | 7,927.34    | 7,570.93    | 6,814.80    | 6,382.19    | 28,695.26   |
| 326                   | 8,605.18    | 7,634.59    | 7,421.55    | 6,936.19    | 30,597.51   |
| 327                   | 19,411.68   | 18,654.18   | 17,246.30   | 17,636.29   | 72,948.45   |
| 328                   | 10,471.82   | 9,911.06    | 9,074.29    | 8,725.54    | 38,182.72   |
| 329                   | 17,385.49   | 16,621.35   | 15,603.49   | 14,545.96   | 64,156.29   |
| 330                   | 17,984.43   | 18,330.15   | 17,856.97   | 16,930.30   | 71,101.85   |
| 331                   | 7,109.50    | 7,058.29    | 6,497.32    | 6,324.30    | 26,989.41   |
| 333                   | 17,628.43   | 15,818.33   | 14,238.65   | 13,388.52   | 61,073.92   |
| 334                   | 26,752.00   | 25,886.79   | 24,942.65   | 24,053.65   | 101,635.08  |
| 335                   | 15,951.71   | 15,560.99   | 13,659.71   | 13,108.40   | 58,280.80   |

|                             |                   |                   |                   |                   |                     |
|-----------------------------|-------------------|-------------------|-------------------|-------------------|---------------------|
| 336                         | 25,050.03         | 24,276.35         | 21,508.50         | 20,616.29         | 91,451.16           |
| 337                         | 23,996.52         | 23,613.16         | 21,507.25         | 20,785.50         | 89,902.42           |
| 338                         | 8,005.74          | 7,519.82          | 6,300.44          | 6,491.54          | 28,317.54           |
| 339                         | 20,954.16         | 19,358.13         | 17,290.05         | 16,363.22         | 73,965.56           |
| 341                         | 6,401.14          | 6,008.64          | 5,235.87          | 5,068.71          | 22,714.36           |
| 342                         | 20,382.77         | 19,048.42         | 16,747.18         | 16,882.49         | 73,060.86           |
| 344                         | 12,932.85         | 12,126.94         | 10,459.66         | 10,144.80         | 45,664.26           |
| 346                         | 25,260.27         | 24,137.87         | 22,147.61         | 22,428.64         | 93,974.39           |
| 347                         | 9,589.50          | 8,951.92          | 8,265.28          | 8,547.67          | 35,354.38           |
| 349                         | 13,643.55         | 13,463.77         | 12,561.72         | 13,069.33         | 52,738.37           |
| <b>FL - FLORIDA - Total</b> | <b>371,027.93</b> | <b>354,851.78</b> | <b>324,461.45</b> | <b>315,983.33</b> | <b>1,366,324.49</b> |

**STATE: GA - GEORGIA**

| REGISTRANT ZIP CODE 3       | 1ST QUARTER       | 2ND QUARTER       | 3RD QUARTER      | 4TH QUARTER      | TOTAL GRAMS       |
|-----------------------------|-------------------|-------------------|------------------|------------------|-------------------|
| 300                         | 21,275.41         | 20,619.93         | 20,040.73        | 18,850.39        | 80,786.46         |
| 301                         | 15,327.96         | 14,607.94         | 14,113.72        | 13,745.19        | 57,794.80         |
| 302                         | 10,273.00         | 9,834.22          | 9,129.45         | 9,086.72         | 38,323.39         |
| 303                         | 5,943.53          | 5,543.07          | 5,530.87         | 4,946.56         | 21,964.04         |
| 304                         | 2,174.37          | 2,027.15          | 2,169.86         | 2,101.97         | 8,473.35          |
| 305                         | 8,276.19          | 8,395.90          | 7,808.25         | 7,959.53         | 32,439.87         |
| 306                         | 4,304.16          | 3,858.66          | 3,739.71         | 3,640.93         | 15,543.45         |
| 307                         | 3,096.22          | 2,869.54          | 2,828.08         | 2,772.71         | 11,566.55         |
| 308                         | 1,811.51          | 1,860.59          | 1,788.68         | 1,755.75         | 7,216.54          |
| 309                         | 4,344.94          | 3,964.18          | 3,855.71         | 3,463.78         | 15,628.60         |
| 310                         | 5,961.82          | 5,656.46          | 5,295.03         | 5,199.59         | 22,112.90         |
| 312                         | 2,506.33          | 2,461.06          | 2,846.53         | 2,200.06         | 10,013.97         |
| 313                         | 2,482.51          | 2,181.14          | 2,442.94         | 1,957.94         | 9,064.53          |
| 314                         | 2,421.69          | 2,335.12          | 2,420.54         | 2,382.84         | 9,560.20          |
| 315                         | 4,044.00          | 3,718.11          | 3,716.32         | 3,304.18         | 14,782.61         |
| 316                         | 2,900.14          | 2,900.75          | 2,938.60         | 2,883.51         | 11,623.01         |
| 317                         | 2,971.75          | 3,131.92          | 2,897.26         | 2,892.37         | 11,893.30         |
| 318                         | 454.86            | 409.82            | 391.19           | 462.12           | 1,717.99          |
| 319                         | 3,385.89          | 3,389.26          | 3,125.25         | 2,898.93         | 12,799.34         |
| 398                         | 849.00            | 869.24            | 794.00           | 763.45           | 3,275.69          |
| <b>GA - GEORGIA - Total</b> | <b>104,805.28</b> | <b>100,634.05</b> | <b>97,872.74</b> | <b>93,268.52</b> | <b>396,580.59</b> |

**STATE: GU - GUAM**

| REGISTRANT ZIP CODE 3    | 1ST QUARTER     | 2ND QUARTER   | 3RD QUARTER   | 4TH QUARTER   | TOTAL GRAMS     |
|--------------------------|-----------------|---------------|---------------|---------------|-----------------|
| 969                      | 1,005.28        | 826.94        | 769.30        | 765.17        | 3,366.70        |
| <b>GU - GUAM - Total</b> | <b>1,005.28</b> | <b>826.94</b> | <b>769.30</b> | <b>765.17</b> | <b>3,366.70</b> |

**STATE: HI - HAWAII**

| REGISTRANT ZIP CODE 3 | 1ST QUARTER | 2ND QUARTER | 3RD QUARTER | 4TH QUARTER | TOTAL GRAMS |
|-----------------------|-------------|-------------|-------------|-------------|-------------|
|-----------------------|-------------|-------------|-------------|-------------|-------------|



|                            |                  |                  |                  |                  |                  |
|----------------------------|------------------|------------------|------------------|------------------|------------------|
| 967                        | 11,693.82        | 12,115.84        | 10,771.07        | 9,904.86         | <b>44,485.59</b> |
| 968                        | 6,816.77         | 6,666.33         | 6,228.34         | 5,945.65         | <b>25,657.08</b> |
| <b>HI - HAWAII - Total</b> | <b>18,510.58</b> | <b>18,782.17</b> | <b>16,999.40</b> | <b>15,850.51</b> | <b>70,142.67</b> |

**STATE: IA - IOWA**

| REGISTRANT ZIP CODE 3    | 1ST QUARTER      | 2ND QUARTER      | 3RD QUARTER      | 4TH QUARTER      | TOTAL GRAMS       |
|--------------------------|------------------|------------------|------------------|------------------|-------------------|
| 500                      | 2,213.15         | 2,165.22         | 1,945.75         | 1,973.96         | <b>8,298.08</b>   |
| 501                      | 2,353.03         | 2,392.79         | 2,308.00         | 2,125.97         | <b>9,179.79</b>   |
| 502                      | 1,866.36         | 1,767.58         | 1,754.57         | 1,686.07         | <b>7,074.57</b>   |
| 503                      | 4,763.91         | 4,372.68         | 4,051.90         | 4,298.51         | <b>17,487.00</b>  |
| 504                      | 1,139.36         | 1,049.08         | 1,005.54         | 935.59           | <b>4,129.58</b>   |
| 505                      | 1,265.25         | 1,242.85         | 1,301.95         | 1,262.46         | <b>5,072.51</b>   |
| 506                      | 1,030.48         | 982.02           | 1,029.76         | 951.86           | <b>3,994.12</b>   |
| 507                      | 672.78           | 701.74           | 669.74           | 632.75           | <b>2,677.02</b>   |
| 508                      | 396.33           | 417.89           | 422.82           | 431.64           | <b>1,668.69</b>   |
| 510                      | 521.32           | 447.80           | 395.98           | 407.49           | <b>1,772.60</b>   |
| 511                      | 1,004.97         | 885.88           | 876.20           | 928.39           | <b>3,695.44</b>   |
| 512                      | 245.27           | 234.57           | 308.23           | 271.31           | <b>1,059.38</b>   |
| 513                      | 346.00           | 367.83           | 394.53           | 286.34           | <b>1,394.69</b>   |
| 514                      | 607.02           | 622.70           | 476.41           | 489.00           | <b>2,195.13</b>   |
| 515                      | 1,178.32         | 1,101.13         | 1,045.80         | 998.96           | <b>4,324.21</b>   |
| 516                      | 185.44           | 145.51           | 128.89           | 102.87           | <b>562.71</b>     |
| 520                      | 1,285.45         | 1,240.41         | 1,264.84         | 1,196.80         | <b>4,987.49</b>   |
| 521                      | 278.21           | 216.32           | 234.91           | 251.94           | <b>981.37</b>     |
| 522                      | 2,113.17         | 1,664.39         | 1,972.52         | 1,727.87         | <b>7,477.95</b>   |
| 523                      | 733.20           | 748.62           | 725.58           | 685.24           | <b>2,892.65</b>   |
| 524                      | 1,319.90         | 1,341.56         | 1,237.38         | 1,294.79         | <b>5,193.63</b>   |
| 525                      | 1,577.08         | 1,567.21         | 1,543.21         | 1,373.49         | <b>6,061.00</b>   |
| 526                      | 1,144.32         | 1,058.57         | 1,060.37         | 1,053.26         | <b>4,316.52</b>   |
| 527                      | 986.54           | 1,022.67         | 1,008.31         | 1,023.60         | <b>4,041.12</b>   |
| 528                      | 1,351.72         | 1,176.44         | 1,050.36         | 1,365.88         | <b>4,944.40</b>   |
| <b>IA - IOWA - Total</b> | <b>30,578.58</b> | <b>28,933.47</b> | <b>28,213.55</b> | <b>27,756.04</b> | <b>115,481.64</b> |

**STATE: ID - IDAHO**

| REGISTRANT ZIP CODE 3 | 1ST QUARTER | 2ND QUARTER | 3RD QUARTER | 4TH QUARTER | TOTAL GRAMS      |
|-----------------------|-------------|-------------|-------------|-------------|------------------|
| 832                   | 2,525.72    | 2,574.08    | 2,338.43    | 2,345.24    | <b>9,783.47</b>  |
| 833                   | 2,750.10    | 2,360.12    | 2,138.45    | 2,083.17    | <b>9,331.84</b>  |
| 834                   | 1,788.93    | 1,748.84    | 1,537.21    | 1,526.79    | <b>6,601.76</b>  |
| 835                   | 1,630.74    | 1,486.62    | 1,321.83    | 1,328.90    | <b>5,768.08</b>  |
| 836                   | 7,343.62    | 7,046.12    | 6,916.30    | 6,287.36    | <b>27,593.40</b> |
| 837                   | 5,490.22    | 5,701.78    | 5,857.10    | 5,073.74    | <b>22,122.85</b> |
| 838                   | 4,120.24    | 4,014.10    | 3,866.51    | 3,802.21    | <b>15,803.07</b> |

|                           |                  |                  |                  |                  |                  |
|---------------------------|------------------|------------------|------------------|------------------|------------------|
| <b>ID - IDAHO - Total</b> | <b>25,649.58</b> | <b>24,931.66</b> | <b>23,975.83</b> | <b>22,447.40</b> | <b>97,004.47</b> |
|---------------------------|------------------|------------------|------------------|------------------|------------------|

**STATE: IL - ILLINOIS**

| REGISTRANT ZIP CODE 3        | 1ST QUARTER      | 2ND QUARTER      | 3RD QUARTER      | 4TH QUARTER      | TOTAL GRAMS       |
|------------------------------|------------------|------------------|------------------|------------------|-------------------|
| 600                          | 18,788.57        | 17,858.79        | 18,025.30        | 16,811.51        | 71,484.17         |
| 601                          | 8,232.80         | 7,684.22         | 7,554.77         | 7,405.74         | 30,877.53         |
| 602                          | 327.55           | 279.85           | 317.91           | 255.48           | 1,180.79          |
| 603                          | 506.64           | 484.31           | 433.49           | 429.67           | 1,854.11          |
| 604                          | 10,083.61        | 10,005.98        | 9,405.62         | 9,357.58         | 38,852.79         |
| 605                          | 5,589.97         | 5,064.45         | 4,811.48         | 4,817.62         | 20,283.52         |
| 606                          | 10,185.85        | 9,725.26         | 9,068.97         | 9,475.42         | 38,455.49         |
| 607                          | 671.80           | 730.40           | 691.57           | 775.21           | 2,868.98          |
| 608                          | 491.83           | 398.01           | 415.45           | 476.04           | 1,781.33          |
| 609                          | 1,539.14         | 1,484.53         | 1,603.27         | 1,506.67         | 6,133.62          |
| 610                          | 2,745.28         | 2,744.12         | 2,752.26         | 2,660.76         | 10,902.42         |
| 611                          | 3,474.69         | 3,081.82         | 3,089.22         | 2,933.13         | 12,578.87         |
| 612                          | 1,299.56         | 1,282.88         | 1,231.84         | 1,387.45         | 5,201.72          |
| 613                          | 1,100.85         | 1,112.38         | 989.92           | 1,003.87         | 4,207.02          |
| 614                          | 841.63           | 814.25           | 786.75           | 773.42           | 3,216.04          |
| 615                          | 1,820.17         | 1,706.04         | 1,593.37         | 1,782.68         | 6,902.26          |
| 616                          | 3,109.16         | 3,112.13         | 3,077.96         | 3,580.59         | 12,879.84         |
| 617                          | 1,474.57         | 1,388.20         | 1,304.85         | 1,378.86         | 5,546.48          |
| 618                          | 2,483.49         | 2,485.15         | 2,346.42         | 2,491.43         | 9,806.50          |
| 619                          | 795.49           | 741.74           | 712.25           | 738.34           | 2,987.83          |
| 620                          | 3,321.27         | 2,955.24         | 2,896.45         | 2,842.42         | 12,015.38         |
| 622                          | 3,630.57         | 3,434.24         | 2,880.15         | 2,882.78         | 12,827.74         |
| 623                          | 1,131.79         | 1,154.79         | 1,046.35         | 1,005.13         | 4,338.06          |
| 624                          | 1,085.45         | 1,056.43         | 1,189.78         | 1,026.79         | 4,358.46          |
| 625                          | 1,914.18         | 1,818.43         | 1,768.96         | 1,868.73         | 7,370.30          |
| 626                          | 1,354.44         | 1,457.35         | 1,245.96         | 1,382.07         | 5,439.81          |
| 627                          | 1,538.31         | 1,513.61         | 1,586.45         | 1,613.60         | 6,251.97          |
| 628                          | 1,788.80         | 1,977.47         | 1,744.16         | 1,746.73         | 7,257.16          |
| 629                          | 3,844.96         | 3,797.28         | 3,452.15         | 3,491.07         | 14,585.46         |
| <b>IL - ILLINOIS - Total</b> | <b>95,172.42</b> | <b>91,349.37</b> | <b>88,023.10</b> | <b>87,900.76</b> | <b>362,445.64</b> |

**STATE: IN - INDIANA**

| REGISTRANT ZIP CODE 3 | 1ST QUARTER | 2ND QUARTER | 3RD QUARTER | 4TH QUARTER | TOTAL GRAMS |
|-----------------------|-------------|-------------|-------------|-------------|-------------|
| 460                   | 4,543.62    | 4,140.93    | 4,299.06    | 4,181.72    | 17,165.33   |
| 461                   | 6,179.61    | 6,125.22    | 6,983.10    | 7,111.01    | 26,398.93   |
| 462                   | 14,901.50   | 14,807.36   | 11,928.73   | 11,815.53   | 53,453.12   |
| 463                   | 6,298.92    | 5,953.06    | 5,585.93    | 5,335.35    | 23,173.27   |
| 464                   | 546.94      | 457.06      | 423.14      | 343.90      | 1,771.05    |

|                             |                  |                  |                  |                  |                   |
|-----------------------------|------------------|------------------|------------------|------------------|-------------------|
| 465                         | 5,736.87         | 5,205.76         | 4,897.19         | 4,864.29         | 20,704.11         |
| 466                         | 1,771.16         | 1,565.86         | 1,373.73         | 1,369.14         | 6,079.89          |
| 467                         | 2,838.42         | 3,018.90         | 2,592.31         | 2,826.96         | 11,276.59         |
| 468                         | 3,697.77         | 3,662.41         | 3,780.38         | 3,766.37         | 14,906.93         |
| 469                         | 4,247.71         | 3,850.55         | 3,614.85         | 3,478.33         | 15,191.44         |
| 470                         | 1,486.18         | 1,332.81         | 1,278.07         | 1,252.45         | 5,349.51          |
| 471                         | 4,118.47         | 3,546.72         | 3,490.15         | 3,395.62         | 14,550.96         |
| 472                         | 2,318.78         | 2,107.75         | 1,986.14         | 2,009.38         | 8,422.05          |
| 473                         | 4,888.00         | 4,832.05         | 4,664.79         | 4,641.28         | 19,026.11         |
| 474                         | 1,930.46         | 1,739.30         | 1,667.60         | 1,597.53         | 6,934.89          |
| 475                         | 1,920.42         | 1,734.92         | 1,571.94         | 1,385.45         | 6,612.73          |
| 476                         | 1,276.96         | 1,111.92         | 1,104.09         | 1,006.47         | 4,499.44          |
| 477                         | 3,633.36         | 3,448.52         | 3,152.70         | 2,852.88         | 13,087.46         |
| 478                         | 1,767.75         | 1,348.65         | 1,519.57         | 1,313.50         | 5,949.48          |
| 479                         | 3,235.20         | 3,253.78         | 2,474.32         | 2,166.19         | 11,129.49         |
| <b>IN - INDIANA - Total</b> | <b>77,338.11</b> | <b>73,243.52</b> | <b>68,387.78</b> | <b>66,713.35</b> | <b>285,682.76</b> |

**STATE: KS - KANSAS**

| REGISTRANT ZIP CODE 3      | 1ST QUARTER      | 2ND QUARTER      | 3RD QUARTER      | 4TH QUARTER      | TOTAL GRAMS       |
|----------------------------|------------------|------------------|------------------|------------------|-------------------|
| 660                        | 6,028.43         | 5,602.52         | 5,239.76         | 5,559.33         | 22,430.04         |
| 661                        | 1,558.11         | 1,153.59         | 1,016.09         | 1,029.97         | 4,757.76          |
| 662                        | 6,176.01         | 5,935.84         | 5,795.81         | 5,644.06         | 23,551.72         |
| 664                        | 618.88           | 627.54           | 660.89           | 610.40           | 2,517.72          |
| 665                        | 1,107.90         | 1,028.73         | 901.57           | 946.26           | 3,984.47          |
| 666                        | 2,645.51         | 2,591.86         | 2,665.06         | 2,629.54         | 10,531.97         |
| 667                        | 2,476.69         | 2,479.65         | 2,266.74         | 2,223.88         | 9,446.96          |
| 668                        | 738.78           | 670.67           | 657.71           | 659.88           | 2,727.05          |
| 669                        | 671.08           | 678.41           | 666.77           | 609.59           | 2,625.85          |
| 670                        | 2,301.87         | 2,271.60         | 2,083.61         | 2,109.95         | 8,767.03          |
| 671                        | 1,373.99         | 1,225.11         | 1,125.20         | 1,043.08         | 4,767.37          |
| 672                        | 7,388.21         | 7,215.23         | 6,675.48         | 6,255.47         | 27,534.39         |
| 673                        | 1,364.16         | 1,213.14         | 1,097.53         | 1,031.96         | 4,706.80          |
| 674                        | 2,075.68         | 2,042.65         | 1,957.23         | 1,909.30         | 7,984.86          |
| 675                        | 1,199.15         | 1,252.94         | 1,235.03         | 1,134.81         | 4,821.93          |
| 676                        | 970.04           | 991.27           | 883.00           | 894.82           | 3,739.12          |
| 677                        | 543.83           | 675.40           | 488.80           | 484.14           | 2,192.17          |
| 678                        | 893.16           | 889.37           | 871.64           | 801.35           | 3,455.53          |
| 679                        | 342.80           | 368.87           | 371.91           | 318.84           | 1,402.42          |
| <b>KS - KANSAS - Total</b> | <b>40,474.30</b> | <b>38,914.39</b> | <b>36,659.84</b> | <b>35,896.64</b> | <b>151,945.16</b> |

**STATE: KY - KENTUCKY**

| REGISTRANT ZIP CODE 3 | 1ST QUARTER | 2ND QUARTER | 3RD QUARTER | 4TH QUARTER | TOTAL GRAMS |
|-----------------------|-------------|-------------|-------------|-------------|-------------|
|-----------------------|-------------|-------------|-------------|-------------|-------------|

|                              |                  |                  |                  |                  |                   |
|------------------------------|------------------|------------------|------------------|------------------|-------------------|
| 400                          | 1,231.92         | 1,182.49         | 1,135.15         | 1,150.35         | 4,699.92          |
| 401                          | 1,161.71         | 960.42           | 987.48           | 943.80           | 4,053.40          |
| 402                          | 7,066.03         | 6,732.58         | 6,072.32         | 6,388.98         | 26,259.91         |
| 403                          | 2,555.90         | 2,473.06         | 2,210.98         | 2,286.97         | 9,526.91          |
| 404                          | 1,296.50         | 1,226.04         | 1,181.34         | 1,139.93         | 4,843.81          |
| 405                          | 3,460.82         | 3,136.01         | 2,848.59         | 3,198.33         | 12,643.74         |
| 406                          | 275.88           | 259.25           | 217.29           | 226.00           | 978.42            |
| 407                          | 1,155.25         | 1,004.99         | 1,065.57         | 995.58           | 4,221.39          |
| 408                          | 271.80           | 274.30           | 254.58           | 230.98           | 1,031.66          |
| 409                          | 524.30           | 518.37           | 441.85           | 470.22           | 1,954.73          |
| 410                          | 5,601.92         | 5,305.71         | 4,901.78         | 4,889.44         | 20,698.85         |
| 411                          | 1,120.88         | 1,117.66         | 937.30           | 1,022.86         | 4,198.69          |
| 412                          | 333.33           | 309.66           | 250.02           | 267.59           | 1,160.59          |
| 413                          | 349.00           | 335.13           | 263.35           | 292.90           | 1,240.37          |
| 414                          | 162.63           | 163.33           | 162.35           | 153.37           | 641.69            |
| 415                          | 422.08           | 427.14           | 422.34           | 396.94           | 1,668.51          |
| 416                          | 287.41           | 291.54           | 288.37           | 312.63           | 1,179.95          |
| 417                          | 962.52           | 1,106.49         | 1,028.77         | 1,083.80         | 4,181.57          |
| 418                          | 152.54           | 131.27           | 135.95           | 130.55           | 550.31            |
| 420                          | 2,691.11         | 2,629.55         | 2,624.60         | 2,521.19         | 10,466.45         |
| 421                          | 2,649.58         | 2,541.82         | 2,262.03         | 2,201.26         | 9,654.70          |
| 422                          | 1,519.28         | 1,343.28         | 1,357.47         | 1,090.53         | 5,310.57          |
| 423                          | 1,791.02         | 1,718.05         | 1,546.10         | 1,581.71         | 6,636.88          |
| 424                          | 1,904.13         | 1,739.37         | 1,592.83         | 1,576.29         | 6,812.62          |
| 425                          | 618.54           | 622.34           | 671.71           | 581.65           | 2,494.23          |
| 426                          | 419.16           | 455.91           | 435.95           | 367.28           | 1,678.31          |
| 427                          | 1,845.62         | 1,710.37         | 1,697.34         | 1,628.70         | 6,882.03          |
| <b>KY - KENTUCKY - Total</b> | <b>41,830.87</b> | <b>39,716.11</b> | <b>36,993.42</b> | <b>37,129.80</b> | <b>155,670.20</b> |

**STATE: LA - LOUISIANA**

| REGISTRANT ZIP CODE 3 | 1ST QUARTER | 2ND QUARTER | 3RD QUARTER | 4TH QUARTER | TOTAL GRAMS |
|-----------------------|-------------|-------------|-------------|-------------|-------------|
| 700                   | 5,931.58    | 5,093.71    | 4,950.72    | 4,691.06    | 20,667.06   |
| 701                   | 3,388.01    | 3,020.69    | 3,226.99    | 2,580.53    | 12,216.22   |
| 703                   | 1,764.00    | 1,656.45    | 1,441.85    | 1,349.21    | 6,211.51    |
| 704                   | 5,731.14    | 5,416.63    | 4,928.21    | 4,912.91    | 20,988.89   |
| 705                   | 5,224.26    | 5,372.05    | 5,523.20    | 4,929.93    | 21,049.45   |
| 706                   | 1,677.70    | 1,778.23    | 1,679.81    | 1,579.15    | 6,714.89    |
| 707                   | 5,649.02    | 5,415.84    | 5,333.19    | 4,897.29    | 21,295.34   |
| 708                   | 4,270.92    | 4,275.24    | 3,687.07    | 3,853.38    | 16,086.60   |
| 710                   | 1,686.29    | 1,642.71    | 1,582.34    | 1,469.93    | 6,381.27    |
| 711                   | 5,679.45    | 5,286.61    | 5,735.02    | 5,852.11    | 22,553.19   |

|                               |                  |                  |                  |                  |                   |
|-------------------------------|------------------|------------------|------------------|------------------|-------------------|
| 712                           | 2,029.57         | 1,958.67         | 1,903.11         | 1,958.32         | 7,849.66          |
| 713                           | 3,911.78         | 4,138.83         | 3,815.86         | 3,659.04         | 15,525.50         |
| 714                           | 1,814.50         | 1,853.20         | 1,824.31         | 1,727.79         | 7,219.80          |
| <b>LA - LOUISIANA - Total</b> | <b>48,758.22</b> | <b>46,908.85</b> | <b>45,631.68</b> | <b>43,460.65</b> | <b>184,759.40</b> |

**STATE: MA - MASSACHUSETTS**

| REGISTRANT ZIP CODE 3             | 1ST QUARTER      | 2ND QUARTER      | 3RD QUARTER      | 4TH QUARTER      | TOTAL GRAMS       |
|-----------------------------------|------------------|------------------|------------------|------------------|-------------------|
| 010                               | 6,676.75         | 6,544.78         | 6,266.12         | 6,361.54         | 25,849.20         |
| 011                               | 2,928.45         | 3,014.81         | 2,559.75         | 2,573.43         | 11,076.43         |
| 012                               | 1,156.89         | 1,209.59         | 1,112.86         | 1,087.48         | 4,566.83          |
| 013                               | 1,307.86         | 1,153.44         | 1,147.82         | 1,173.68         | 4,782.80          |
| 014                               | 2,211.58         | 2,154.91         | 1,962.83         | 1,868.93         | 8,198.24          |
| 015                               | 3,046.34         | 2,803.89         | 2,806.88         | 2,581.71         | 11,238.83         |
| 016                               | 1,894.56         | 1,911.72         | 1,904.42         | 1,654.84         | 7,365.54          |
| 017                               | 2,902.45         | 3,049.74         | 3,285.35         | 3,148.28         | 12,385.82         |
| 018                               | 8,829.01         | 8,399.16         | 7,431.07         | 7,244.97         | 31,904.20         |
| 019                               | 3,802.71         | 3,436.21         | 3,344.14         | 3,326.92         | 13,909.98         |
| 020                               | 2,069.27         | 1,867.73         | 1,832.54         | 1,953.50         | 7,723.04          |
| 021                               | 7,211.99         | 6,956.31         | 6,032.31         | 6,128.62         | 26,329.23         |
| 022                               | 839.18           | 825.57           | 639.11           | 839.55           | 3,143.40          |
| 023                               | 4,497.08         | 4,480.28         | 4,099.05         | 5,169.28         | 18,245.69         |
| 024                               | 1,298.20         | 1,238.80         | 1,186.07         | 1,148.09         | 4,871.17          |
| 025                               | 1,042.01         | 1,000.55         | 971.23           | 972.57           | 3,986.36          |
| 026                               | 1,488.85         | 1,416.27         | 1,393.51         | 1,211.55         | 5,510.18          |
| 027                               | 7,655.33         | 7,615.69         | 7,482.33         | 7,147.30         | 29,900.64         |
| <b>MA - MASSACHUSETTS - Total</b> | <b>60,858.52</b> | <b>59,079.46</b> | <b>55,457.37</b> | <b>55,592.24</b> | <b>230,987.59</b> |

**STATE: MD - MARYLAND**

| REGISTRANT ZIP CODE 3 | 1ST QUARTER | 2ND QUARTER | 3RD QUARTER | 4TH QUARTER | TOTAL GRAMS |
|-----------------------|-------------|-------------|-------------|-------------|-------------|
| 206                   | 4,366.81    | 4,302.09    | 3,985.85    | 3,864.78    | 16,519.52   |
| 207                   | 5,737.12    | 4,901.66    | 4,767.20    | 3,979.93    | 19,385.90   |
| 208                   | 5,490.21    | 6,049.09    | 4,543.02    | 4,607.61    | 20,689.93   |
| 209                   | 912.82      | 768.02      | 755.27      | 734.15      | 3,170.25    |
| 210                   | 11,179.51   | 10,557.03   | 9,567.70    | 9,459.66    | 40,763.89   |
| 211                   | 5,077.55    | 4,541.44    | 4,203.84    | 3,934.47    | 17,757.29   |
| 212                   | 16,598.21   | 15,331.77   | 14,174.19   | 13,952.96   | 60,057.14   |
| 214                   | 955.55      | 850.11      | 848.13      | 920.45      | 3,574.24    |
| 215                   | 1,755.12    | 1,517.50    | 1,381.13    | 1,310.14    | 5,963.88    |
| 216                   | 2,464.96    | 2,259.28    | 2,115.39    | 2,041.13    | 8,880.76    |
| 217                   | 7,059.78    | 6,836.64    | 6,407.39    | 6,154.36    | 26,458.18   |
| 218                   | 2,103.51    | 1,781.59    | 2,018.55    | 1,705.05    | 7,608.69    |
| 219                   | 3,676.87    | 3,427.19    | 2,989.85    | 2,641.78    | 12,735.69   |

|                              |                  |                  |                  |                  |                   |
|------------------------------|------------------|------------------|------------------|------------------|-------------------|
| <b>MD - MARYLAND - Total</b> | <b>67,378.01</b> | <b>63,123.40</b> | <b>57,757.50</b> | <b>55,306.46</b> | <b>243,565.36</b> |
|------------------------------|------------------|------------------|------------------|------------------|-------------------|

**STATE: ME - MAINE**

| REGISTRANT ZIP CODE 3     | 1ST QUARTER      | 2ND QUARTER      | 3RD QUARTER      | 4TH QUARTER      | TOTAL GRAMS      |
|---------------------------|------------------|------------------|------------------|------------------|------------------|
| 039                       | 357.67           | 253.97           | 251.97           | 253.52           | 1,117.12         |
| 040                       | 3,556.59         | 3,339.64         | 3,285.36         | 3,310.31         | 13,491.90        |
| 041                       | 981.25           | 1,100.71         | 851.98           | 823.13           | 3,757.07         |
| 042                       | 1,527.65         | 1,434.18         | 1,575.76         | 1,666.69         | 6,204.28         |
| 043                       | 2,514.05         | 2,588.29         | 2,405.11         | 2,159.06         | 9,666.51         |
| 044                       | 1,319.54         | 1,105.39         | 1,134.42         | 1,040.45         | 4,599.81         |
| 045                       | 366.23           | 392.42           | 398.75           | 356.60           | 1,514.00         |
| 046                       | 589.06           | 521.38           | 558.37           | 657.50           | 2,326.30         |
| 047                       | 594.58           | 629.35           | 509.11           | 514.21           | 2,247.25         |
| 048                       | 581.73           | 597.96           | 471.89           | 403.72           | 2,055.30         |
| 049                       | 2,344.64         | 2,405.19         | 2,331.73         | 2,391.19         | 9,472.75         |
| <b>ME - MAINE - Total</b> | <b>14,733.01</b> | <b>14,368.48</b> | <b>13,774.44</b> | <b>13,576.37</b> | <b>56,452.30</b> |

**STATE: MI - MICHIGAN**

| REGISTRANT ZIP CODE 3        | 1ST QUARTER       | 2ND QUARTER       | 3RD QUARTER       | 4TH QUARTER       | TOTAL GRAMS       |
|------------------------------|-------------------|-------------------|-------------------|-------------------|-------------------|
| 480                          | 18,554.16         | 17,835.08         | 16,176.43         | 15,259.21         | 67,824.89         |
| 481                          | 19,619.29         | 18,104.82         | 17,250.16         | 16,562.96         | 71,537.23         |
| 482                          | 10,519.17         | 10,639.73         | 9,189.25          | 9,596.47          | 39,944.63         |
| 483                          | 13,275.14         | 12,556.65         | 11,497.98         | 10,894.87         | 48,224.65         |
| 484                          | 6,270.94          | 6,106.26          | 5,819.88          | 5,898.33          | 24,095.41         |
| 485                          | 3,706.41          | 3,476.27          | 3,186.11          | 2,979.14          | 13,347.93         |
| 486                          | 11,012.29         | 10,546.76         | 10,026.93         | 9,438.87          | 41,024.84         |
| 487                          | 5,179.35          | 4,847.97          | 4,629.31          | 4,545.79          | 19,202.43         |
| 488                          | 8,398.86          | 7,861.86          | 7,608.72          | 7,487.87          | 31,357.30         |
| 489                          | 3,655.57          | 3,830.12          | 3,719.15          | 3,091.70          | 14,296.54         |
| 490                          | 14,105.42         | 13,309.92         | 12,496.61         | 11,774.11         | 51,686.05         |
| 491                          | 1,685.65          | 1,548.76          | 1,531.25          | 1,598.26          | 6,363.92          |
| 492                          | 5,836.64          | 5,138.98          | 4,423.27          | 4,246.85          | 19,645.74         |
| 493                          | 3,299.52          | 3,207.04          | 2,970.17          | 2,908.93          | 12,385.65         |
| 494                          | 9,008.21          | 8,944.54          | 8,098.39          | 8,437.14          | 34,488.28         |
| 495                          | 7,406.22          | 6,828.33          | 6,902.87          | 6,517.59          | 27,655.02         |
| 496                          | 8,090.26          | 7,647.47          | 7,264.97          | 6,627.47          | 29,630.17         |
| 497                          | 7,214.37          | 6,871.09          | 6,522.55          | 5,870.05          | 26,478.06         |
| 498                          | 4,030.66          | 3,271.30          | 3,298.94          | 2,995.92          | 13,596.82         |
| 499                          | 1,295.90          | 1,174.14          | 1,142.25          | 1,129.93          | 4,742.21          |
| <b>MI - MICHIGAN - Total</b> | <b>162,164.04</b> | <b>153,747.08</b> | <b>143,755.19</b> | <b>137,861.48</b> | <b>597,527.79</b> |

**STATE: MN - MINNESOTA**

| REGISTRANT ZIP CODE 3 | 1ST QUARTER | 2ND QUARTER | 3RD QUARTER | 4TH QUARTER | TOTAL GRAMS |
|-----------------------|-------------|-------------|-------------|-------------|-------------|
|-----------------------|-------------|-------------|-------------|-------------|-------------|

|                               |                  |                  |                  |                  |                   |
|-------------------------------|------------------|------------------|------------------|------------------|-------------------|
| 550                           | 4,448.72         | 4,323.24         | 4,189.38         | 4,092.24         | 17,053.58         |
| 551                           | 5,549.83         | 5,469.21         | 5,611.89         | 4,933.02         | 21,563.94         |
| 553                           | 5,540.66         | 5,364.16         | 5,111.12         | 4,802.11         | 20,818.05         |
| 554                           | 10,197.22        | 9,115.43         | 8,673.70         | 9,189.65         | 37,176.00         |
| 556                           | 158.48           | 158.12           | 183.10           | 155.39           | 655.09            |
| 557                           | 1,587.21         | 1,338.37         | 1,393.41         | 1,326.72         | 5,645.71          |
| 558                           | 1,391.50         | 1,382.24         | 1,233.25         | 1,091.32         | 5,098.31          |
| 559                           | 1,857.49         | 1,779.07         | 1,701.23         | 1,645.80         | 6,983.59          |
| 560                           | 1,800.48         | 1,463.87         | 1,386.77         | 1,287.97         | 5,939.10          |
| 561                           | 640.67           | 736.42           | 805.91           | 739.64           | 2,922.63          |
| 562                           | 1,023.65         | 900.39           | 924.93           | 919.30           | 3,768.27          |
| 563                           | 3,021.75         | 3,191.18         | 2,973.19         | 2,870.55         | 12,056.66         |
| 564                           | 1,384.55         | 1,392.42         | 1,312.60         | 1,257.83         | 5,347.39          |
| 565                           | 1,359.36         | 1,265.70         | 1,240.46         | 1,169.11         | 5,034.62          |
| 566                           | 666.68           | 716.37           | 671.36           | 572.77           | 2,627.18          |
| 567                           | 677.46           | 562.88           | 587.46           | 441.02           | 2,268.83          |
| <b>MN - MINNESOTA - Total</b> | <b>41,305.71</b> | <b>39,159.05</b> | <b>37,999.77</b> | <b>36,494.43</b> | <b>154,958.95</b> |

**STATE: MO - MISSOURI**

| REGISTRANT ZIP CODE 3 | 1ST QUARTER | 2ND QUARTER | 3RD QUARTER | 4TH QUARTER | TOTAL GRAMS |
|-----------------------|-------------|-------------|-------------|-------------|-------------|
| 630                   | 9,606.70    | 8,795.28    | 7,934.93    | 7,541.10    | 33,878.02   |
| 631                   | 14,113.28   | 13,052.25   | 13,396.57   | 13,032.34   | 53,594.45   |
| 633                   | 4,816.63    | 4,476.35    | 4,157.91    | 4,307.92    | 17,758.80   |
| 634                   | 577.39      | 548.07      | 486.72      | 594.37      | 2,206.56    |
| 635                   | 1,092.81    | 1,077.78    | 1,119.54    | 1,015.69    | 4,305.82    |
| 636                   | 2,827.24    | 2,274.61    | 2,193.21    | 1,999.73    | 9,294.78    |
| 637                   | 1,317.26    | 1,172.46    | 1,080.70    | 1,121.70    | 4,692.12    |
| 638                   | 1,240.17    | 1,077.59    | 1,064.19    | 1,094.00    | 4,475.95    |
| 639                   | 1,339.33    | 1,159.91    | 1,151.24    | 1,072.20    | 4,722.69    |
| 640                   | 6,899.20    | 6,562.12    | 6,301.59    | 6,530.96    | 26,293.87   |
| 641                   | 6,240.08    | 5,760.53    | 5,400.72    | 4,669.40    | 22,070.73   |
| 644                   | 833.00      | 700.93      | 669.15      | 645.93      | 2,849.02    |
| 645                   | 1,310.62    | 1,262.18    | 1,068.08    | 972.07      | 4,612.95    |
| 646                   | 771.23      | 757.27      | 647.16      | 492.07      | 2,667.73    |
| 647                   | 2,066.23    | 1,770.22    | 1,872.46    | 1,722.10    | 7,431.01    |
| 648                   | 3,470.86    | 3,440.69    | 3,408.86    | 3,529.69    | 13,850.10   |
| 650                   | 1,599.86    | 1,525.85    | 1,315.57    | 1,342.23    | 5,783.50    |
| 651                   | 1,037.92    | 929.53      | 812.90      | 936.50      | 3,716.85    |
| 652                   | 4,135.24    | 4,041.89    | 3,787.12    | 3,513.28    | 15,477.53   |
| 653                   | 897.68      | 853.06      | 732.02      | 732.49      | 3,215.24    |
| 654                   | 1,177.85    | 1,036.66    | 1,013.71    | 946.01      | 4,174.23    |

|                              |                  |                  |                  |                  |                   |
|------------------------------|------------------|------------------|------------------|------------------|-------------------|
| 655                          | 1,878.33         | 1,741.18         | 1,525.83         | 1,615.36         | <b>6,760.70</b>   |
| 656                          | 4,090.88         | 3,676.23         | 3,902.49         | 3,726.35         | <b>15,395.96</b>  |
| 657                          | 6,939.13         | 6,432.58         | 6,508.87         | 6,312.72         | <b>26,193.31</b>  |
| 658                          | 6,890.25         | 6,382.16         | 6,222.38         | 5,986.13         | <b>25,480.92</b>  |
| <b>MO - MISSOURI - Total</b> | <b>87,169.18</b> | <b>80,507.38</b> | <b>77,773.94</b> | <b>75,452.35</b> | <b>320,902.84</b> |

**STATE: MS - MISSISSIPPI**

| REGISTRANT ZIP CODE 3           | 1ST QUARTER      | 2ND QUARTER      | 3RD QUARTER      | 4TH QUARTER      | TOTAL GRAMS       |
|---------------------------------|------------------|------------------|------------------|------------------|-------------------|
| 386                             | 3,427.31         | 3,469.17         | 3,418.02         | 3,167.57         | <b>13,482.07</b>  |
| 387                             | 307.46           | 327.99           | 324.99           | 340.31           | <b>1,300.75</b>   |
| 388                             | 3,952.14         | 3,691.26         | 3,470.83         | 3,316.81         | <b>14,431.03</b>  |
| 389                             | 772.81           | 814.59           | 680.87           | 589.24           | <b>2,857.52</b>   |
| 390                             | 2,695.66         | 2,591.01         | 2,350.20         | 2,194.12         | <b>9,830.99</b>   |
| 391                             | 4,888.78         | 5,338.29         | 5,365.61         | 4,798.11         | <b>20,390.79</b>  |
| 392                             | 3,090.49         | 3,079.30         | 3,020.50         | 2,618.04         | <b>11,808.33</b>  |
| 393                             | 2,893.97         | 2,569.51         | 2,350.46         | 2,168.36         | <b>9,982.29</b>   |
| 394                             | 4,794.16         | 4,608.72         | 4,458.28         | 4,566.40         | <b>18,427.57</b>  |
| 395                             | 5,017.67         | 4,825.08         | 4,371.35         | 3,767.77         | <b>17,981.88</b>  |
| 396                             | 1,782.34         | 1,535.38         | 1,549.83         | 1,431.70         | <b>6,299.26</b>   |
| 397                             | 1,326.73         | 1,274.03         | 1,179.52         | 1,176.64         | <b>4,956.92</b>   |
| <b>MS - MISSISSIPPI - Total</b> | <b>34,949.52</b> | <b>34,124.33</b> | <b>32,540.47</b> | <b>30,135.07</b> | <b>131,749.38</b> |

**STATE: MT - MONTANA**

| REGISTRANT ZIP CODE 3       | 1ST QUARTER      | 2ND QUARTER      | 3RD QUARTER      | 4TH QUARTER      | TOTAL GRAMS      |
|-----------------------------|------------------|------------------|------------------|------------------|------------------|
| 590                         | 1,082.87         | 1,046.85         | 1,051.35         | 780.65           | <b>3,961.72</b>  |
| 591                         | 3,353.59         | 2,935.06         | 2,752.98         | 2,575.41         | <b>11,617.04</b> |
| 592                         | 557.52           | 557.98           | 543.94           | 485.15           | <b>2,144.60</b>  |
| 593                         | 553.20           | 557.23           | 534.11           | 465.13           | <b>2,109.67</b>  |
| 594                         | 1,726.02         | 1,652.48         | 1,533.31         | 1,574.75         | <b>6,486.55</b>  |
| 595                         | 240.46           | 247.00           | 243.62           | 204.58           | <b>935.66</b>    |
| 596                         | 1,819.75         | 1,809.35         | 1,892.78         | 1,163.19         | <b>6,685.06</b>  |
| 597                         | 1,717.45         | 1,636.77         | 1,719.77         | 1,723.11         | <b>6,797.10</b>  |
| 598                         | 2,621.04         | 2,503.49         | 2,505.84         | 2,277.33         | <b>9,907.70</b>  |
| 599                         | 2,296.51         | 2,302.22         | 2,111.90         | 1,876.87         | <b>8,587.51</b>  |
| <b>MT - MONTANA - Total</b> | <b>15,968.41</b> | <b>15,248.43</b> | <b>14,889.61</b> | <b>13,126.17</b> | <b>59,232.61</b> |

**STATE: NC - NORTH CAROLINA**

| REGISTRANT ZIP CODE 3 | 1ST QUARTER | 2ND QUARTER | 3RD QUARTER | 4TH QUARTER | TOTAL GRAMS      |
|-----------------------|-------------|-------------|-------------|-------------|------------------|
| 270                   | 3,446.73    | 3,257.98    | 3,120.57    | 3,168.76    | <b>12,994.04</b> |
| 271                   | 3,256.59    | 2,924.83    | 2,730.92    | 2,816.48    | <b>11,728.83</b> |
| 272                   | 6,416.86    | 5,961.45    | 6,148.96    | 5,871.04    | <b>24,398.32</b> |
| 273                   | 4,041.00    | 4,229.99    | 3,979.66    | 4,565.64    | <b>16,816.29</b> |
| 274                   | 2,940.18    | 2,595.07    | 2,706.78    | 2,591.50    | <b>10,833.53</b> |



|                                    |                   |                   |                   |                   |                   |
|------------------------------------|-------------------|-------------------|-------------------|-------------------|-------------------|
| 275                                | 10,753.70         | 10,517.92         | 10,052.23         | 11,172.32         | 42,496.17         |
| 276                                | 3,420.73          | 3,381.36          | 3,294.97          | 3,274.46          | 13,371.52         |
| 277                                | 5,234.87          | 4,677.04          | 4,161.41          | 4,324.80          | 18,398.13         |
| 278                                | 6,162.56          | 6,092.64          | 6,108.44          | 6,271.92          | 24,635.56         |
| 279                                | 2,107.23          | 2,190.73          | 2,275.51          | 2,301.35          | 8,874.82          |
| 280                                | 8,872.87          | 8,207.31          | 7,736.19          | 7,841.00          | 32,657.37         |
| 281                                | 7,062.25          | 6,832.87          | 6,455.52          | 6,598.69          | 26,949.35         |
| 282                                | 4,989.48          | 4,752.92          | 5,297.73          | 4,537.76          | 19,577.90         |
| 283                                | 8,245.73          | 7,705.17          | 7,348.83          | 7,567.07          | 30,866.80         |
| 284                                | 6,249.16          | 5,871.21          | 5,998.51          | 6,360.29          | 24,479.17         |
| 285                                | 5,966.54          | 5,594.61          | 5,610.13          | 6,203.03          | 23,374.31         |
| 286                                | 9,890.92          | 10,130.03         | 9,616.52          | 9,937.81          | 39,575.30         |
| 287                                | 6,898.39          | 6,510.15          | 6,223.22          | 6,265.03          | 25,896.79         |
| 288                                | 3,279.83          | 2,894.96          | 2,953.05          | 2,994.85          | 12,122.69         |
| 289                                | 735.23            | 795.60            | 815.57            | 822.73            | 3,169.13          |
| <b>NC - NORTH CAROLINA - Total</b> | <b>109,970.87</b> | <b>105,123.85</b> | <b>102,634.74</b> | <b>105,486.56</b> | <b>423,216.02</b> |

**STATE: ND - NORTH DAKOTA**

| REGISTRANT ZIP CODE 3            | 1ST QUARTER     | 2ND QUARTER     | 3RD QUARTER     | 4TH QUARTER     | TOTAL GRAMS      |
|----------------------------------|-----------------|-----------------|-----------------|-----------------|------------------|
| 580                              | 328.53          | 264.32          | 306.85          | 286.04          | 1,185.74         |
| 581                              | 1,220.74        | 995.00          | 1,064.39        | 1,211.66        | 4,491.78         |
| 582                              | 861.96          | 801.76          | 827.84          | 865.67          | 3,357.23         |
| 583                              | 327.34          | 297.00          | 344.49          | 277.10          | 1,245.92         |
| 584                              | 252.07          | 274.21          | 303.16          | 264.68          | 1,094.12         |
| 585                              | 1,859.16        | 1,818.70        | 1,667.37        | 1,516.96        | 6,862.20         |
| 586                              | 244.89          | 249.96          | 221.16          | 208.31          | 924.32           |
| 587                              | 346.27          | 355.13          | 370.84          | 358.98          | 1,431.22         |
| 588                              | 230.97          | 191.86          | 244.89          | 267.56          | 935.28           |
| <b>ND - NORTH DAKOTA - Total</b> | <b>5,671.92</b> | <b>5,247.94</b> | <b>5,351.00</b> | <b>5,256.95</b> | <b>21,527.80</b> |

**STATE: NE - NEBRASKA**

| REGISTRANT ZIP CODE 3 | 1ST QUARTER | 2ND QUARTER | 3RD QUARTER | 4TH QUARTER | TOTAL GRAMS |
|-----------------------|-------------|-------------|-------------|-------------|-------------|
| 680                   | 2,155.53    | 2,154.06    | 2,121.08    | 2,195.85    | 8,626.52    |
| 681                   | 5,893.72    | 5,953.89    | 5,716.79    | 5,516.71    | 23,081.11   |
| 683                   | 584.11      | 637.12      | 541.40      | 508.78      | 2,271.41    |
| 684                   | 506.04      | 585.30      | 490.62      | 565.07      | 2,147.03    |
| 685                   | 2,460.59    | 2,492.57    | 2,299.47    | 2,141.23    | 9,393.87    |
| 686                   | 420.54      | 402.62      | 367.79      | 362.65      | 1,553.61    |
| 687                   | 930.82      | 918.60      | 841.27      | 861.88      | 3,552.57    |
| 688                   | 1,755.02    | 1,667.11    | 1,581.14    | 1,487.04    | 6,490.30    |
| 689                   | 588.88      | 628.94      | 576.13      | 571.22      | 2,365.16    |
| 690                   | 310.74      | 299.74      | 339.94      | 305.66      | 1,256.08    |

|                              |                  |                  |                  |                  |                  |
|------------------------------|------------------|------------------|------------------|------------------|------------------|
| 691                          | 701.77           | 740.71           | 662.41           | 598.52           | <b>2,703.41</b>  |
| 692                          | 54.74            | 60.19            | 44.59            | 40.12            | <b>199.65</b>    |
| 693                          | 969.83           | 909.40           | 850.03           | 814.02           | <b>3,543.28</b>  |
| <b>NE - NEBRASKA - Total</b> | <b>17,332.34</b> | <b>17,450.26</b> | <b>16,432.67</b> | <b>15,968.73</b> | <b>67,184.01</b> |

**STATE: NH - NEW HAMPSHIRE**

| REGISTRANT ZIP CODE 3             | 1ST QUARTER      | 2ND QUARTER      | 3RD QUARTER      | 4TH QUARTER      | TOTAL GRAMS      |
|-----------------------------------|------------------|------------------|------------------|------------------|------------------|
| 030                               | 4,185.20         | 4,296.68         | 3,990.04         | 4,142.38         | <b>16,614.30</b> |
| 031                               | 2,535.56         | 2,613.73         | 2,334.55         | 2,396.04         | <b>9,879.87</b>  |
| 032                               | 1,847.16         | 1,749.86         | 1,656.49         | 1,590.99         | <b>6,844.49</b>  |
| 033                               | 1,896.59         | 1,825.07         | 1,787.55         | 1,844.80         | <b>7,354.00</b>  |
| 034                               | 780.92           | 769.11           | 721.42           | 716.72           | <b>2,988.17</b>  |
| 035                               | 650.77           | 625.03           | 559.20           | 522.46           | <b>2,357.46</b>  |
| 036                               | 142.33           | 191.59           | 155.74           | 158.75           | <b>648.40</b>    |
| 037                               | 1,056.42         | 1,171.15         | 912.39           | 825.95           | <b>3,965.91</b>  |
| 038                               | 3,910.43         | 3,851.02         | 3,516.95         | 3,448.49         | <b>14,726.89</b> |
| <b>NH - NEW HAMPSHIRE - Total</b> | <b>17,005.38</b> | <b>17,093.23</b> | <b>15,634.32</b> | <b>15,646.56</b> | <b>65,379.49</b> |

**STATE: NJ - NEW JERSEY**

| REGISTRANT ZIP CODE 3          | 1ST QUARTER      | 2ND QUARTER      | 3RD QUARTER      | 4TH QUARTER      | TOTAL GRAMS       |
|--------------------------------|------------------|------------------|------------------|------------------|-------------------|
| 070                            | 10,075.08        | 9,641.50         | 8,867.20         | 8,892.59         | <b>37,476.37</b>  |
| 071                            | 1,360.98         | 1,508.97         | 1,283.44         | 1,185.24         | <b>5,338.64</b>   |
| 072                            | 529.14           | 524.33           | 510.14           | 595.98           | <b>2,159.60</b>   |
| 073                            | 750.19           | 739.75           | 623.42           | 694.37           | <b>2,807.72</b>   |
| 074                            | 4,788.60         | 4,245.08         | 4,117.57         | 4,107.59         | <b>17,258.84</b>  |
| 075                            | 681.40           | 734.18           | 712.29           | 748.53           | <b>2,876.40</b>   |
| 076                            | 5,229.64         | 5,169.08         | 5,134.38         | 5,413.46         | <b>20,946.56</b>  |
| 077                            | 5,503.84         | 5,399.60         | 4,785.78         | 4,861.40         | <b>20,550.63</b>  |
| 078                            | 2,709.91         | 2,399.12         | 2,376.98         | 2,054.55         | <b>9,540.56</b>   |
| 079                            | 1,884.85         | 2,063.63         | 1,823.90         | 2,043.58         | <b>7,815.95</b>   |
| 080                            | 16,609.39        | 16,057.69        | 15,211.00        | 14,340.72        | <b>62,218.80</b>  |
| 081                            | 1,468.91         | 1,362.37         | 1,364.43         | 1,284.53         | <b>5,480.23</b>   |
| 082                            | 2,928.02         | 2,793.36         | 2,745.94         | 2,423.64         | <b>10,890.97</b>  |
| 083                            | 1,976.19         | 1,947.67         | 1,767.68         | 1,674.66         | <b>7,366.20</b>   |
| 084                            | 453.73           | 383.23           | 341.55           | 403.27           | <b>1,581.78</b>   |
| 085                            | 1,827.44         | 1,765.30         | 1,698.92         | 1,486.44         | <b>6,778.10</b>   |
| 086                            | 2,104.26         | 1,818.77         | 1,818.59         | 2,044.68         | <b>7,786.29</b>   |
| 087                            | 4,789.34         | 4,795.17         | 4,530.83         | 4,475.17         | <b>18,590.51</b>  |
| 088                            | 8,835.97         | 8,432.13         | 8,074.31         | 8,087.16         | <b>33,429.58</b>  |
| 089                            | 660.71           | 566.83           | 599.25           | 511.55           | <b>2,338.34</b>   |
| <b>NJ - NEW JERSEY - Total</b> | <b>75,167.59</b> | <b>72,347.77</b> | <b>68,387.60</b> | <b>67,329.10</b> | <b>283,232.06</b> |

**STATE: NM - NEW MEXICO**

| REGISTRANT ZIP CODE 3          | 1ST QUARTER      | 2ND QUARTER      | 3RD QUARTER      | 4TH QUARTER      | TOTAL GRAMS      |
|--------------------------------|------------------|------------------|------------------|------------------|------------------|
| 870                            | 1,785.07         | 1,574.62         | 1,603.77         | 1,634.14         | 6,597.60         |
| 871                            | 10,943.00        | 10,131.85        | 9,689.59         | 9,879.45         | 40,643.88        |
| 873                            | 773.57           | 791.44           | 815.13           | 742.98           | 3,123.13         |
| 874                            | 1,071.72         | 841.04           | 935.47           | 872.43           | 3,720.66         |
| 875                            | 2,490.95         | 2,370.75         | 2,083.76         | 2,232.01         | 9,177.47         |
| 877                            | 340.70           | 298.02           | 335.24           | 306.25           | 1,280.20         |
| 878                            | 95.14            | 109.94           | 90.60            | 90.42            | 386.11           |
| 879                            | 208.30           | 200.67           | 173.15           | 188.60           | 770.72           |
| 880                            | 1,897.82         | 1,843.54         | 1,812.17         | 1,855.31         | 7,408.84         |
| 881                            | 483.96           | 444.82           | 460.24           | 413.12           | 1,802.15         |
| 882                            | 2,237.74         | 2,217.91         | 2,036.43         | 2,021.68         | 8,513.76         |
| 883                            | 632.63           | 587.55           | 544.30           | 573.49           | 2,337.98         |
| 884                            | 66.85            | 52.31            | 42.64            | 44.57            | 206.37           |
| <b>NM - NEW MEXICO - Total</b> | <b>23,027.43</b> | <b>21,464.48</b> | <b>20,622.48</b> | <b>20,854.45</b> | <b>85,968.84</b> |

**STATE: NV - NEVADA**

| REGISTRANT ZIP CODE 3      | 1ST QUARTER      | 2ND QUARTER      | 3RD QUARTER      | 4TH QUARTER      | TOTAL GRAMS       |
|----------------------------|------------------|------------------|------------------|------------------|-------------------|
| 890                        | 13,269.88        | 11,969.46        | 11,248.89        | 10,698.54        | 47,186.76         |
| 891                        | 27,046.54        | 25,032.08        | 25,034.29        | 22,280.29        | 99,393.20         |
| 893                        | 82.57            | 73.38            | 48.66            | 69.30            | 273.91            |
| 894                        | 3,858.84         | 3,645.09         | 3,477.59         | 3,278.35         | 14,259.87         |
| 895                        | 4,605.82         | 4,425.03         | 4,327.48         | 4,332.87         | 17,691.19         |
| 897                        | 1,451.98         | 1,442.89         | 1,503.72         | 1,592.30         | 5,990.89          |
| 898                        | 407.22           | 316.75           | 297.02           | 283.67           | 1,304.66          |
| <b>NV - NEVADA - Total</b> | <b>50,722.85</b> | <b>46,904.66</b> | <b>45,937.64</b> | <b>42,535.32</b> | <b>186,100.47</b> |

**STATE: NY - NEW YORK**

| REGISTRANT ZIP CODE 3 | 1ST QUARTER | 2ND QUARTER | 3RD QUARTER | 4TH QUARTER | TOTAL GRAMS |
|-----------------------|-------------|-------------|-------------|-------------|-------------|
| 100                   | 12,272.44   | 11,276.83   | 10,461.21   | 10,377.81   | 44,388.30   |
| 101                   | 235.01      | 177.36      | 199.16      | 159.83      | 771.37      |
| 102                   | 15.79       | 4.51        | 6.77        | 6.77        | 33.84       |
| 103                   | 5,085.75    | 5,310.09    | 5,439.58    | 4,571.67    | 20,407.10   |
| 104                   | 5,761.14    | 5,659.14    | 5,643.87    | 4,713.93    | 21,778.09   |
| 105                   | 2,352.17    | 2,168.19    | 2,396.77    | 1,775.75    | 8,692.89    |
| 106                   | 401.48      | 381.30      | 467.08      | 392.86      | 1,642.73    |
| 107                   | 713.28      | 825.86      | 736.33      | 685.42      | 2,960.88    |
| 108                   | 234.31      | 241.01      | 214.79      | 268.31      | 958.43      |
| 109                   | 2,741.78    | 2,850.60    | 2,710.13    | 2,427.40    | 10,729.91   |
| 110                   | 3,354.53    | 3,059.72    | 3,443.51    | 3,430.62    | 13,288.38   |
| 111                   | 643.91      | 700.53      | 533.78      | 503.59      | 2,381.80    |
| 112                   | 7,786.53    | 7,472.77    | 6,805.09    | 6,995.92    | 29,060.32   |

|                              |                   |                   |                   |                   |                   |
|------------------------------|-------------------|-------------------|-------------------|-------------------|-------------------|
| 113                          | 2,841.52          | 2,706.43          | 2,671.65          | 2,642.11          | 10,861.71         |
| 114                          | 1,391.86          | 1,277.90          | 1,244.17          | 1,150.40          | 5,064.34          |
| 115                          | 4,448.55          | 4,404.49          | 4,006.34          | 3,972.35          | 16,831.74         |
| 116                          | 462.52            | 473.93            | 435.81            | 332.18            | 1,704.44          |
| 117                          | 15,972.60         | 16,074.73         | 14,967.74         | 14,840.79         | 61,855.86         |
| 118                          | 390.87            | 517.34            | 374.19            | 460.96            | 1,743.37          |
| 119                          | 1,813.70          | 1,813.78          | 1,728.14          | 1,804.06          | 7,159.69          |
| 120                          | 3,440.29          | 3,440.80          | 3,401.63          | 3,166.18          | 13,448.90         |
| 121                          | 1,596.33          | 1,370.83          | 1,544.15          | 1,460.07          | 5,971.39          |
| 122                          | 2,466.03          | 2,539.99          | 2,222.59          | 2,340.95          | 9,569.56          |
| 123                          | 873.64            | 754.09            | 735.94            | 672.50            | 3,036.17          |
| 124                          | 2,122.63          | 1,991.56          | 2,272.38          | 2,090.63          | 8,477.20          |
| 125                          | 3,164.10          | 3,150.08          | 2,849.26          | 2,710.74          | 11,874.18         |
| 126                          | 860.32            | 929.80            | 784.22            | 832.81            | 3,407.16          |
| 127                          | 1,288.76          | 1,173.74          | 1,010.63          | 982.43            | 4,455.56          |
| 128                          | 2,800.31          | 2,534.25          | 2,712.07          | 2,488.89          | 10,535.52         |
| 129                          | 2,144.30          | 1,972.95          | 2,054.86          | 1,955.72          | 8,127.82          |
| 130                          | 4,150.83          | 3,958.30          | 3,869.60          | 3,672.75          | 15,651.48         |
| 131                          | 1,406.52          | 1,439.05          | 1,439.25          | 1,374.96          | 5,659.77          |
| 132                          | 3,594.78          | 3,597.54          | 3,235.62          | 3,041.97          | 13,469.91         |
| 133                          | 1,308.15          | 1,191.11          | 1,183.93          | 1,060.76          | 4,743.96          |
| 134                          | 1,718.49          | 1,565.56          | 1,679.95          | 1,584.07          | 6,548.06          |
| 135                          | 706.89            | 685.69            | 554.39            | 505.77            | 2,452.74          |
| 136                          | 2,079.90          | 2,075.40          | 2,057.98          | 2,069.86          | 8,283.14          |
| 137                          | 869.77            | 712.29            | 730.18            | 679.50            | 2,991.74          |
| 138                          | 3,143.28          | 2,616.00          | 2,706.55          | 2,865.49          | 11,331.32         |
| 139                          | 757.68            | 686.85            | 624.52            | 550.00            | 2,619.04          |
| 140                          | 4,497.58          | 4,530.08          | 4,132.83          | 4,008.48          | 17,168.97         |
| 141                          | 1,908.48          | 1,899.02          | 1,989.26          | 1,862.64          | 7,659.40          |
| 142                          | 6,174.69          | 5,807.64          | 5,321.30          | 5,429.25          | 22,732.89         |
| 143                          | 824.49            | 763.42            | 667.03            | 643.34            | 2,898.29          |
| 144                          | 2,788.05          | 2,884.53          | 2,632.17          | 2,570.95          | 10,875.70         |
| 145                          | 2,214.32          | 2,165.26          | 2,068.32          | 2,115.24          | 8,563.14          |
| 146                          | 5,587.04          | 5,437.23          | 5,153.73          | 5,107.87          | 21,285.87         |
| 147                          | 1,999.42          | 1,945.88          | 1,894.35          | 1,804.58          | 7,644.23          |
| 148                          | 3,877.31          | 3,617.23          | 3,343.13          | 3,466.94          | 14,304.62         |
| 149                          | 860.61            | 750.95            | 685.45            | 755.72            | 3,052.73          |
| <b>NY - NEW YORK - Total</b> | <b>140,144.76</b> | <b>135,583.64</b> | <b>130,043.41</b> | <b>125,383.84</b> | <b>531,155.65</b> |

**STATE: OH - OHIO**

| REGISTRANT ZIP CODE 3 | 1ST QUARTER | 2ND QUARTER | 3RD QUARTER | 4TH QUARTER | TOTAL GRAMS |
|-----------------------|-------------|-------------|-------------|-------------|-------------|
|-----------------------|-------------|-------------|-------------|-------------|-------------|

|                          |                   |                   |                  |                  |                   |
|--------------------------|-------------------|-------------------|------------------|------------------|-------------------|
| 430                      | 6,409.30          | 5,851.53          | 5,799.42         | 6,027.91         | 24,088.15         |
| 431                      | 3,724.82          | 3,425.58          | 3,073.92         | 3,277.70         | 13,502.01         |
| 432                      | 10,225.85         | 9,198.67          | 7,309.13         | 7,001.68         | 33,735.33         |
| 433                      | 1,361.13          | 1,241.51          | 1,198.58         | 1,234.72         | 5,035.93          |
| 434                      | 1,186.46          | 1,213.16          | 1,002.56         | 1,105.96         | 4,508.15          |
| 435                      | 3,176.46          | 2,852.63          | 2,646.94         | 2,940.39         | 11,616.42         |
| 436                      | 4,986.13          | 4,560.83          | 4,400.59         | 3,948.89         | 17,896.44         |
| 437                      | 1,798.97          | 1,913.88          | 1,808.27         | 1,656.92         | 7,178.04          |
| 438                      | 312.73            | 287.54            | 296.89           | 310.69           | 1,207.85          |
| 439                      | 2,151.10          | 2,016.92          | 2,054.61         | 2,055.16         | 8,277.78          |
| 440                      | 5,046.11          | 4,859.48          | 4,678.17         | 4,786.43         | 19,370.19         |
| 441                      | 7,568.79          | 7,355.50          | 7,173.37         | 7,122.27         | 29,219.94         |
| 442                      | 4,806.05          | 4,495.93          | 4,129.29         | 4,076.49         | 17,507.76         |
| 443                      | 2,221.64          | 2,287.15          | 2,078.79         | 1,990.58         | 8,578.16          |
| 444                      | 3,550.20          | 3,276.91          | 3,085.39         | 3,064.16         | 12,976.66         |
| 445                      | 2,252.63          | 2,234.91          | 2,142.45         | 2,357.82         | 8,987.80          |
| 446                      | 3,114.58          | 2,871.64          | 2,832.79         | 2,949.17         | 11,768.18         |
| 447                      | 2,498.70          | 2,276.92          | 2,314.05         | 2,339.64         | 9,429.31          |
| 448                      | 2,672.76          | 2,531.77          | 2,490.08         | 2,246.42         | 9,941.03          |
| 449                      | 640.05            | 653.67            | 602.67           | 725.80           | 2,622.19          |
| 450                      | 7,099.78          | 6,780.24          | 6,373.65         | 6,469.25         | 26,722.92         |
| 451                      | 2,747.47          | 2,665.36          | 2,541.41         | 2,629.42         | 10,583.66         |
| 452                      | 8,249.03          | 7,293.51          | 6,953.75         | 7,086.22         | 29,582.51         |
| 453                      | 4,306.10          | 4,296.17          | 4,226.49         | 4,602.92         | 17,431.68         |
| 454                      | 5,328.51          | 4,620.14          | 4,286.08         | 4,030.14         | 18,264.87         |
| 455                      | 829.76            | 821.14            | 803.87           | 678.02           | 3,132.79          |
| 456                      | 4,971.58          | 4,953.80          | 4,569.37         | 4,382.09         | 18,876.84         |
| 457                      | 1,087.67          | 1,283.07          | 1,141.34         | 1,364.03         | 4,876.11          |
| 458                      | 2,102.03          | 2,261.83          | 2,058.19         | 2,164.35         | 8,586.40          |
| <b>OH - OHIO - Total</b> | <b>106,426.38</b> | <b>100,381.39</b> | <b>94,072.11</b> | <b>94,625.23</b> | <b>395,505.12</b> |

**STATE: OK - OKLAHOMA**

| REGISTRANT ZIP CODE 3 | 1ST QUARTER | 2ND QUARTER | 3RD QUARTER | 4TH QUARTER | TOTAL GRAMS |
|-----------------------|-------------|-------------|-------------|-------------|-------------|
| 730                   | 13,727.85   | 12,519.56   | 11,686.40   | 9,645.90    | 47,579.70   |
| 731                   | 18,222.66   | 16,620.24   | 15,997.05   | 14,357.05   | 65,197.00   |
| 734                   | 2,151.08    | 2,011.68    | 1,731.35    | 1,515.60    | 7,409.72    |
| 735                   | 4,535.31    | 4,387.69    | 4,209.92    | 3,540.94    | 16,673.86   |
| 736                   | 856.49      | 789.11      | 765.84      | 640.00      | 3,051.44    |
| 737                   | 1,240.56    | 1,118.21    | 1,094.06    | 938.07      | 4,390.90    |
| 738                   | 258.73      | 237.47      | 201.04      | 184.73      | 881.97      |
| 739                   | 61.42       | 72.30       | 68.92       | 41.94       | 244.58      |

|                              |                  |                  |                  |                  |                   |
|------------------------------|------------------|------------------|------------------|------------------|-------------------|
| 740                          | 15,977.29        | 13,368.84        | 11,941.27        | 10,076.96        | 51,364.36         |
| 741                          | 8,386.05         | 8,000.10         | 7,056.96         | 6,239.08         | 29,682.19         |
| 743                          | 2,192.44         | 1,839.62         | 1,669.86         | 1,415.25         | 7,117.17          |
| 744                          | 5,378.25         | 4,455.91         | 4,176.97         | 3,329.13         | 17,340.26         |
| 745                          | 1,587.15         | 1,579.18         | 1,320.85         | 1,202.81         | 5,689.99          |
| 746                          | 919.62           | 803.18           | 669.73           | 744.83           | 3,137.37          |
| 747                          | 994.10           | 947.50           | 908.48           | 789.34           | 3,639.43          |
| 748                          | 3,055.74         | 2,945.55         | 2,690.84         | 2,229.10         | 10,921.23         |
| 749                          | 1,631.05         | 1,292.91         | 1,292.22         | 1,006.66         | 5,222.86          |
| <b>OK - OKLAHOMA - Total</b> | <b>81,175.79</b> | <b>72,989.07</b> | <b>67,481.79</b> | <b>57,897.39</b> | <b>279,544.04</b> |

**STATE: OR - OREGON**

| REGISTRANT ZIP CODE 3      | 1ST QUARTER      | 2ND QUARTER      | 3RD QUARTER      | 4TH QUARTER      | TOTAL GRAMS       |
|----------------------------|------------------|------------------|------------------|------------------|-------------------|
| 970                        | 10,107.50        | 9,612.71         | 9,258.78         | 8,865.43         | 37,844.41         |
| 971                        | 5,413.72         | 5,138.83         | 4,993.01         | 4,877.47         | 20,423.04         |
| 972                        | 15,282.34        | 14,115.40        | 13,763.56        | 13,493.46        | 56,654.76         |
| 973                        | 7,008.18         | 6,627.21         | 6,723.97         | 6,305.25         | 26,664.61         |
| 974                        | 11,799.90        | 11,306.56        | 10,879.74        | 9,735.53         | 43,721.73         |
| 975                        | 6,083.45         | 6,283.36         | 6,032.03         | 5,996.22         | 24,395.06         |
| 976                        | 1,211.04         | 1,263.60         | 1,167.56         | 1,178.45         | 4,820.64          |
| 977                        | 2,847.40         | 3,422.16         | 3,307.15         | 3,177.33         | 12,754.05         |
| 978                        | 2,188.63         | 2,059.39         | 1,953.62         | 1,905.08         | 8,106.71          |
| 979                        | 460.69           | 360.17           | 335.14           | 311.27           | 1,467.27          |
| <b>OR - OREGON - Total</b> | <b>62,402.85</b> | <b>60,189.39</b> | <b>58,414.56</b> | <b>55,845.49</b> | <b>236,852.29</b> |

**STATE: PA - PENNSYLVANIA**

| REGISTRANT ZIP CODE 3 | 1ST QUARTER | 2ND QUARTER | 3RD QUARTER | 4TH QUARTER | TOTAL GRAMS |
|-----------------------|-------------|-------------|-------------|-------------|-------------|
| 150                   | 10,482.04   | 9,827.26    | 9,161.65    | 8,465.90    | 37,936.86   |
| 151                   | 3,123.51    | 2,939.83    | 2,792.36    | 2,907.71    | 11,763.40   |
| 152                   | 8,973.84    | 8,503.11    | 8,193.50    | 7,740.60    | 33,411.05   |
| 153                   | 2,339.40    | 2,032.79    | 2,032.56    | 1,798.55    | 8,203.30    |
| 154                   | 2,087.94    | 2,074.05    | 2,044.94    | 2,125.01    | 8,331.94    |
| 155                   | 1,068.07    | 935.86      | 957.35      | 875.34      | 3,836.63    |
| 156                   | 5,007.01    | 4,845.11    | 4,573.36    | 4,535.98    | 18,961.45   |
| 157                   | 2,764.99    | 2,464.54    | 2,225.27    | 2,269.19    | 9,723.98    |
| 158                   | 1,778.22    | 1,807.38    | 1,693.54    | 1,569.45    | 6,848.59    |
| 159                   | 2,417.97    | 2,188.63    | 2,132.79    | 2,027.36    | 8,766.74    |
| 160                   | 3,182.55    | 2,905.24    | 2,676.33    | 2,674.79    | 11,438.92   |
| 161                   | 3,992.45    | 3,668.73    | 3,542.02    | 3,274.94    | 14,478.14   |
| 162                   | 1,380.61    | 1,384.97    | 1,242.97    | 1,247.04    | 5,255.59    |
| 163                   | 4,349.33    | 3,708.93    | 3,736.33    | 3,799.60    | 15,594.20   |
| 164                   | 1,467.90    | 1,438.06    | 1,336.28    | 1,375.33    | 5,617.57    |

|                                  |                   |                   |                   |                   |                   |
|----------------------------------|-------------------|-------------------|-------------------|-------------------|-------------------|
| 165                              | 3,603.91          | 3,743.02          | 3,643.46          | 3,255.67          | 14,246.06         |
| 166                              | 4,070.49          | 3,698.53          | 3,831.14          | 3,765.88          | 15,366.04         |
| 167                              | 1,748.18          | 1,706.29          | 1,431.30          | 1,300.71          | 6,186.49          |
| 168                              | 1,124.96          | 1,111.91          | 1,100.94          | 959.49            | 4,297.30          |
| 169                              | 675.41            | 607.71            | 623.49            | 584.34            | 2,490.94          |
| 170                              | 10,957.36         | 10,001.33         | 9,529.46          | 9,294.14          | 39,782.28         |
| 171                              | 2,474.92          | 2,063.47          | 1,932.13          | 2,114.96          | 8,585.48          |
| 172                              | 2,542.96          | 2,497.03          | 2,346.66          | 2,361.51          | 9,748.17          |
| 173                              | 3,839.40          | 3,951.38          | 3,667.73          | 3,440.36          | 14,898.86         |
| 174                              | 2,590.53          | 2,289.80          | 2,149.49          | 1,989.98          | 9,019.80          |
| 175                              | 3,444.34          | 3,191.66          | 3,070.51          | 3,097.46          | 12,803.96         |
| 176                              | 3,153.90          | 2,969.80          | 2,942.13          | 2,807.59          | 11,873.42         |
| 177                              | 1,914.88          | 1,929.06          | 1,723.52          | 1,715.93          | 7,283.39          |
| 178                              | 2,654.94          | 2,539.87          | 2,581.02          | 2,338.30          | 10,114.12         |
| 179                              | 1,369.50          | 1,277.40          | 1,192.58          | 1,109.71          | 4,949.19          |
| 180                              | 3,910.21          | 4,013.31          | 3,550.35          | 3,770.11          | 15,243.98         |
| 181                              | 3,407.02          | 3,207.69          | 3,296.14          | 3,112.84          | 13,023.70         |
| 182                              | 1,826.73          | 1,535.80          | 1,642.06          | 1,495.51          | 6,500.10          |
| 183                              | 2,389.86          | 2,514.42          | 2,248.99          | 2,095.92          | 9,249.19          |
| 184                              | 2,587.04          | 2,475.58          | 2,419.11          | 2,216.53          | 9,698.26          |
| 185                              | 3,176.76          | 2,989.13          | 2,765.52          | 2,462.33          | 11,393.74         |
| 186                              | 2,176.83          | 2,040.91          | 2,049.94          | 2,025.50          | 8,293.18          |
| 187                              | 7,887.62          | 7,681.21          | 6,975.11          | 6,718.74          | 29,262.69         |
| 188                              | 860.10            | 1,041.17          | 841.41            | 925.59            | 3,668.27          |
| 189                              | 3,906.94          | 4,115.63          | 3,888.78          | 3,575.13          | 15,486.48         |
| 190                              | 45,538.10         | 33,700.69         | 54,308.33         | 22,274.96         | 155,822.08        |
| 191                              | 13,832.03         | 12,980.48         | 11,200.94         | 11,404.60         | 49,418.05         |
| 193                              | 5,295.98          | 4,750.35          | 4,386.54          | 4,593.56          | 19,026.43         |
| 194                              | 8,279.56          | 7,568.89          | 6,886.26          | 6,366.32          | 29,101.03         |
| 195                              | 1,629.17          | 1,576.79          | 1,682.41          | 1,570.83          | 6,459.21          |
| 196                              | 2,047.16          | 2,067.96          | 1,930.70          | 1,921.74          | 7,967.56          |
| <b>PA - PENNSYLVANIA - Total</b> | <b>209,332.61</b> | <b>188,562.77</b> | <b>200,179.40</b> | <b>163,353.02</b> | <b>761,427.79</b> |

**STATE: PR - PUERTO RICO**

| REGISTRANT ZIP CODE 3           | 1ST QUARTER     | 2ND QUARTER     | 3RD QUARTER     | 4TH QUARTER     | TOTAL GRAMS     |
|---------------------------------|-----------------|-----------------|-----------------|-----------------|-----------------|
| 006                             | 308.28          | 267.57          | 350.78          | 374.32          | 1,300.95        |
| 007                             | 364.99          | 300.80          | 477.04          | 593.18          | 1,736.02        |
| 009                             | 758.02          | 776.97          | 1,177.14        | 1,085.95        | 3,798.08        |
| <b>PR - PUERTO RICO - Total</b> | <b>1,431.29</b> | <b>1,345.34</b> | <b>2,004.96</b> | <b>2,053.46</b> | <b>6,835.05</b> |

**STATE: RI - RHODE ISLAND**

| REGISTRANT ZIP CODE 3 | 1ST QUARTER | 2ND QUARTER | 3RD QUARTER | 4TH QUARTER | TOTAL GRAMS |
|-----------------------|-------------|-------------|-------------|-------------|-------------|
|-----------------------|-------------|-------------|-------------|-------------|-------------|

|                                  |                  |                 |                 |                 |                  |
|----------------------------------|------------------|-----------------|-----------------|-----------------|------------------|
| 028                              | 6,508.98         | 5,929.53        | 5,515.80        | 5,666.58        | <b>23,620.89</b> |
| 029                              | 3,853.02         | 3,562.40        | 3,292.58        | 3,610.87        | <b>14,318.86</b> |
| <b>RI - RHODE ISLAND - Total</b> | <b>10,361.99</b> | <b>9,491.94</b> | <b>8,808.37</b> | <b>9,277.45</b> | <b>37,939.75</b> |

**STATE: SC - SOUTH CAROLINA**

| REGISTRANT ZIP CODE 3              | 1ST QUARTER      | 2ND QUARTER      | 3RD QUARTER      | 4TH QUARTER      | TOTAL GRAMS       |
|------------------------------------|------------------|------------------|------------------|------------------|-------------------|
| 290                                | 5,030.14         | 5,154.29         | 4,998.91         | 4,960.18         | <b>20,143.52</b>  |
| 291                                | 4,779.98         | 4,715.35         | 4,415.99         | 4,388.33         | <b>18,299.65</b>  |
| 292                                | 4,665.30         | 4,418.78         | 4,389.11         | 3,883.85         | <b>17,357.04</b>  |
| 293                                | 5,599.60         | 5,534.89         | 5,102.09         | 5,119.39         | <b>21,355.97</b>  |
| 294                                | 11,897.10        | 11,043.90        | 11,069.87        | 11,321.20        | <b>45,332.07</b>  |
| 295                                | 9,209.66         | 8,603.49         | 8,277.60         | 8,474.89         | <b>34,565.64</b>  |
| 296                                | 12,390.17        | 12,125.71        | 11,623.49        | 11,358.69        | <b>47,498.06</b>  |
| 297                                | 2,490.57         | 2,452.64         | 2,157.09         | 2,225.74         | <b>9,326.05</b>   |
| 298                                | 2,133.30         | 2,066.88         | 2,134.66         | 2,163.85         | <b>8,498.68</b>   |
| 299                                | 2,556.08         | 2,248.06         | 2,374.80         | 2,436.48         | <b>9,615.42</b>   |
| <b>SC - SOUTH CAROLINA - Total</b> | <b>60,751.90</b> | <b>58,363.99</b> | <b>56,543.60</b> | <b>56,332.60</b> | <b>231,992.09</b> |

**STATE: SD - SOUTH DAKOTA**

| REGISTRANT ZIP CODE 3            | 1ST QUARTER     | 2ND QUARTER     | 3RD QUARTER     | 4TH QUARTER     | TOTAL GRAMS      |
|----------------------------------|-----------------|-----------------|-----------------|-----------------|------------------|
| 570                              | 1,215.64        | 1,326.93        | 1,269.24        | 1,313.49        | <b>5,125.31</b>  |
| 571                              | 2,522.77        | 2,422.08        | 2,379.04        | 2,205.28        | <b>9,529.17</b>  |
| 572                              | 369.06          | 316.42          | 352.48          | 317.23          | <b>1,355.18</b>  |
| 573                              | 450.59          | 417.36          | 360.97          | 379.46          | <b>1,608.38</b>  |
| 574                              | 412.48          | 406.33          | 394.83          | 388.25          | <b>1,601.88</b>  |
| 575                              | 419.48          | 367.84          | 393.00          | 364.21          | <b>1,544.53</b>  |
| 576                              | 141.03          | 36.60           | 50.80           | 43.25           | <b>271.68</b>    |
| 577                              | 2,153.47        | 1,942.54        | 1,955.50        | 1,593.29        | <b>7,644.79</b>  |
| <b>SD - SOUTH DAKOTA - Total</b> | <b>7,684.52</b> | <b>7,236.09</b> | <b>7,155.86</b> | <b>6,604.44</b> | <b>28,680.91</b> |

**STATE: TN - TENNESSEE**

| REGISTRANT ZIP CODE 3 | 1ST QUARTER | 2ND QUARTER | 3RD QUARTER | 4TH QUARTER | TOTAL GRAMS       |
|-----------------------|-------------|-------------|-------------|-------------|-------------------|
| 370                   | 14,867.01   | 13,428.11   | 12,760.12   | 11,619.62   | <b>52,674.86</b>  |
| 371                   | 14,497.49   | 13,295.38   | 12,571.84   | 12,144.64   | <b>52,509.36</b>  |
| 372                   | 8,436.46    | 7,616.08    | 7,190.52    | 6,844.38    | <b>30,087.44</b>  |
| 373                   | 11,025.94   | 10,011.75   | 9,107.35    | 8,719.38    | <b>38,864.42</b>  |
| 374                   | 3,621.64    | 3,239.62    | 2,855.97    | 2,559.56    | <b>12,276.79</b>  |
| 376                   | 8,591.92    | 8,163.54    | 7,644.37    | 7,740.91    | <b>32,140.74</b>  |
| 377                   | 7,074.84    | 7,013.49    | 6,489.96    | 6,361.46    | <b>26,939.75</b>  |
| 378                   | 10,634.81   | 9,839.21    | 9,670.20    | 9,759.20    | <b>39,903.42</b>  |
| 379                   | 7,203.25    | 6,781.20    | 6,329.94    | 6,882.85    | <b>27,197.25</b>  |
| 380                   | 4,316.24    | 4,119.28    | 3,629.34    | 3,429.09    | <b>15,493.96</b>  |
| 381                   | 33,964.70   | 29,511.80   | 39,562.27   | 12,900.94   | <b>115,939.71</b> |



|                               |                   |                   |                   |                   |                   |
|-------------------------------|-------------------|-------------------|-------------------|-------------------|-------------------|
| 382                           | 2,569.76          | 2,270.62          | 1,892.30          | 1,878.73          | <b>8,611.41</b>   |
| 383                           | 6,372.44          | 5,916.01          | 5,531.67          | 4,717.55          | <b>22,537.67</b>  |
| 384                           | 3,734.52          | 3,684.49          | 3,535.37          | 3,359.32          | <b>14,313.71</b>  |
| 385                           | 7,294.11          | 7,304.68          | 6,645.78          | 6,132.50          | <b>27,377.07</b>  |
| <b>TN - TENNESSEE - Total</b> | <b>144,205.13</b> | <b>132,195.26</b> | <b>135,417.02</b> | <b>105,050.14</b> | <b>516,867.55</b> |

**STATE: TX - TEXAS**

| REGISTRANT ZIP CODE 3 | 1ST QUARTER | 2ND QUARTER | 3RD QUARTER | 4TH QUARTER | TOTAL GRAMS      |
|-----------------------|-------------|-------------|-------------|-------------|------------------|
| 750                   | 15,624.09   | 15,335.26   | 14,044.36   | 13,262.18   | <b>58,265.89</b> |
| 751                   | 5,054.72    | 5,081.67    | 4,794.75    | 4,441.38    | <b>19,372.52</b> |
| 752                   | 7,690.40    | 7,325.85    | 6,610.90    | 6,293.82    | <b>27,920.97</b> |
| 753                   | 209.18      | 350.24      | 366.12      | 209.85      | <b>1,135.39</b>  |
| 754                   | 3,951.05    | 3,894.92    | 3,435.72    | 3,325.57    | <b>14,607.26</b> |
| 755                   | 1,185.11    | 1,188.28    | 1,112.59    | 1,131.57    | <b>4,617.55</b>  |
| 756                   | 3,107.31    | 3,276.66    | 2,815.21    | 3,579.24    | <b>12,778.43</b> |
| 757                   | 3,583.36    | 3,451.57    | 3,438.42    | 3,408.45    | <b>13,881.80</b> |
| 758                   | 777.98      | 664.83      | 675.55      | 645.44      | <b>2,763.80</b>  |
| 759                   | 2,397.42    | 2,244.30    | 2,239.61    | 2,054.99    | <b>8,936.31</b>  |
| 760                   | 11,350.31   | 10,785.74   | 10,034.96   | 9,575.79    | <b>41,746.80</b> |
| 761                   | 12,351.35   | 11,276.64   | 11,495.95   | 11,047.29   | <b>46,171.24</b> |
| 762                   | 4,050.56    | 3,742.82    | 3,566.75    | 3,324.63    | <b>14,684.76</b> |
| 763                   | 2,494.06    | 2,401.19    | 2,369.58    | 2,195.71    | <b>9,460.55</b>  |
| 764                   | 1,066.39    | 1,068.06    | 931.04      | 882.93      | <b>3,948.43</b>  |
| 765                   | 3,633.70    | 3,495.26    | 3,356.32    | 2,964.43    | <b>13,449.71</b> |
| 766                   | 1,113.74    | 1,041.15    | 1,039.62    | 1,015.00    | <b>4,209.51</b>  |
| 767                   | 2,831.06    | 2,618.45    | 2,289.79    | 2,521.77    | <b>10,261.08</b> |
| 768                   | 1,008.99    | 875.24      | 817.52      | 840.06      | <b>3,541.80</b>  |
| 769                   | 1,282.68    | 1,109.00    | 1,005.17    | 913.00      | <b>4,309.85</b>  |
| 770                   | 12,100.78   | 11,781.59   | 11,266.86   | 11,966.30   | <b>47,115.52</b> |
| 773                   | 8,112.87    | 7,819.16    | 7,169.70    | 7,129.39    | <b>30,231.12</b> |
| 774                   | 5,584.56    | 5,776.87    | 5,556.92    | 5,193.94    | <b>22,112.29</b> |
| 775                   | 10,809.36   | 10,006.41   | 9,294.34    | 8,755.01    | <b>38,865.13</b> |
| 776                   | 2,811.32    | 2,112.20    | 2,879.92    | 2,106.91    | <b>9,910.34</b>  |
| 777                   | 1,496.26    | 1,328.79    | 1,792.97    | 1,718.63    | <b>6,336.65</b>  |
| 778                   | 2,038.85    | 1,847.38    | 1,794.15    | 1,851.39    | <b>7,531.76</b>  |
| 779                   | 2,264.70    | 2,200.37    | 2,349.76    | 2,181.98    | <b>8,996.81</b>  |
| 780                   | 2,471.73    | 2,379.26    | 2,385.84    | 2,258.02    | <b>9,494.85</b>  |
| 781                   | 2,606.50    | 2,440.41    | 2,523.41    | 2,304.62    | <b>9,874.93</b>  |
| 782                   | 14,709.72   | 14,193.46   | 12,879.60   | 12,311.27   | <b>54,094.05</b> |
| 783                   | 1,416.23    | 1,261.15    | 1,284.42    | 1,318.35    | <b>5,280.15</b>  |
| 784                   | 2,728.13    | 2,703.75    | 2,502.12    | 2,384.38    | <b>10,318.38</b> |

|                           |                   |                   |                   |                   |                   |
|---------------------------|-------------------|-------------------|-------------------|-------------------|-------------------|
| 785                       | 2,813.37          | 2,463.50          | 2,563.05          | 2,404.30          | 10,244.22         |
| 786                       | 7,970.08          | 7,770.94          | 6,943.17          | 6,289.36          | 28,973.55         |
| 787                       | 7,313.04          | 6,483.85          | 6,067.34          | 5,909.58          | 25,773.80         |
| 788                       | 569.96            | 490.93            | 365.74            | 389.04            | 1,815.68          |
| 789                       | 413.78            | 410.75            | 445.25            | 359.88            | 1,629.65          |
| 790                       | 1,416.45          | 1,321.33          | 1,266.73          | 1,164.32          | 5,168.84          |
| 791                       | 3,246.78          | 3,340.85          | 3,268.50          | 3,379.54          | 13,235.66         |
| 792                       | 279.16            | 271.71            | 256.27            | 236.71            | 1,043.85          |
| 793                       | 684.99            | 690.37            | 696.26            | 602.58            | 2,674.20          |
| 794                       | 3,042.25          | 2,958.46          | 2,806.19          | 2,915.61          | 11,722.51         |
| 795                       | 530.55            | 440.27            | 443.69            | 467.62            | 1,882.12          |
| 796                       | 1,557.54          | 1,361.61          | 1,335.49          | 1,264.92          | 5,519.56          |
| 797                       | 2,579.36          | 2,497.48          | 2,147.89          | 2,342.43          | 9,567.16          |
| 798                       | 112.28            | 90.20             | 89.53             | 111.97            | 403.98            |
| 799                       | 3,377.37          | 2,948.98          | 2,813.46          | 2,702.13          | 11,841.94         |
| <b>TX - TEXAS - Total</b> | <b>189,821.39</b> | <b>180,619.18</b> | <b>171,628.50</b> | <b>165,653.28</b> | <b>707,722.35</b> |

**STATE: UT - UTAH**

| REGISTRANT ZIP CODE 3    | 1ST QUARTER      | 2ND QUARTER      | 3RD QUARTER      | 4TH QUARTER      | TOTAL GRAMS       |
|--------------------------|------------------|------------------|------------------|------------------|-------------------|
| 840                      | 17,999.08        | 16,741.17        | 15,817.88        | 15,560.53        | 66,118.66         |
| 841                      | 12,545.47        | 11,532.11        | 11,618.48        | 10,674.41        | 46,370.46         |
| 843                      | 1,755.82         | 1,603.71         | 1,639.80         | 1,612.27         | 6,611.60          |
| 844                      | 4,021.99         | 3,826.17         | 3,724.98         | 3,661.46         | 15,234.60         |
| 845                      | 1,201.37         | 1,137.57         | 1,155.06         | 1,172.25         | 4,666.25          |
| 846                      | 2,983.35         | 2,818.14         | 2,878.67         | 2,896.62         | 11,576.78         |
| 847                      | 5,268.20         | 5,163.05         | 5,006.67         | 4,694.34         | 20,132.27         |
| <b>UT - UTAH - Total</b> | <b>45,775.28</b> | <b>42,821.91</b> | <b>41,841.55</b> | <b>40,271.89</b> | <b>170,710.63</b> |

**STATE: VA - VIRGINIA**

| REGISTRANT ZIP CODE 3 | 1ST QUARTER | 2ND QUARTER | 3RD QUARTER | 4TH QUARTER | TOTAL GRAMS |
|-----------------------|-------------|-------------|-------------|-------------|-------------|
| 201                   | 5,483.58    | 5,906.66    | 5,518.76    | 5,989.11    | 22,898.12   |
| 220                   | 2,328.98    | 2,288.10    | 2,351.29    | 2,026.49    | 8,994.86    |
| 221                   | 2,456.21    | 2,550.49    | 2,420.00    | 2,699.56    | 10,126.27   |
| 222                   | 576.48      | 598.68      | 519.15      | 464.94      | 2,159.26    |
| 223                   | 1,275.86    | 1,345.29    | 1,006.10    | 1,128.54    | 4,755.80    |
| 224                   | 2,431.98    | 2,444.39    | 2,301.43    | 2,223.71    | 9,401.51    |
| 225                   | 852.38      | 886.09      | 687.84      | 837.74      | 3,264.05    |
| 226                   | 2,785.75    | 2,728.77    | 2,592.39    | 2,490.44    | 10,597.36   |
| 227                   | 466.64      | 518.52      | 470.19      | 488.00      | 1,943.36    |
| 228                   | 1,801.83    | 1,671.98    | 1,900.41    | 2,169.03    | 7,543.26    |
| 229                   | 2,170.01    | 2,324.79    | 2,222.90    | 2,056.28    | 8,773.98    |
| 230                   | 1,864.07    | 1,704.29    | 1,859.78    | 1,976.64    | 7,404.78    |

|                              |                  |                  |                  |                  |                   |
|------------------------------|------------------|------------------|------------------|------------------|-------------------|
| 231                          | 2,895.84         | 2,798.62         | 2,760.37         | 2,598.58         | 11,053.40         |
| 232                          | 7,142.37         | 6,175.11         | 5,654.04         | 5,354.71         | 24,326.23         |
| 233                          | 2,313.71         | 2,326.42         | 2,306.90         | 2,309.30         | 9,256.34          |
| 234                          | 5,047.07         | 5,005.22         | 4,567.76         | 4,518.49         | 19,138.53         |
| 235                          | 1,892.92         | 1,684.70         | 1,652.60         | 1,685.69         | 6,915.91          |
| 236                          | 3,305.37         | 2,867.35         | 2,980.58         | 3,042.85         | 12,196.15         |
| 237                          | 1,789.55         | 1,592.04         | 1,265.94         | 1,230.70         | 5,878.23          |
| 238                          | 2,800.37         | 2,946.34         | 2,766.77         | 2,523.00         | 11,036.47         |
| 239                          | 654.44           | 695.49           | 663.17           | 644.27           | 2,657.37          |
| 240                          | 3,703.82         | 3,456.47         | 3,447.88         | 3,521.73         | 14,129.91         |
| 241                          | 4,081.07         | 3,858.26         | 3,410.68         | 3,642.21         | 14,992.22         |
| 242                          | 3,732.47         | 3,666.60         | 3,431.27         | 3,286.59         | 14,116.93         |
| 243                          | 2,115.62         | 1,934.35         | 1,944.33         | 2,134.84         | 8,129.14          |
| 244                          | 1,229.81         | 1,154.21         | 1,114.41         | 971.06           | 4,469.49          |
| 245                          | 2,646.53         | 2,894.63         | 2,773.50         | 2,799.59         | 11,114.25         |
| 246                          | 814.26           | 804.88           | 861.96           | 679.84           | 3,160.94          |
| <b>VA - VIRGINIA - Total</b> | <b>70,659.02</b> | <b>68,828.75</b> | <b>65,452.40</b> | <b>65,493.94</b> | <b>270,434.11</b> |

**STATE: VI - VIRGIN ISLANDS**

| REGISTRANT ZIP CODE 3              | 1ST QUARTER  | 2ND QUARTER   | 3RD QUARTER   | 4TH QUARTER   | TOTAL GRAMS   |
|------------------------------------|--------------|---------------|---------------|---------------|---------------|
| 008                                | 96.93        | 133.71        | 134.38        | 106.74        | 471.76        |
| <b>VI - VIRGIN ISLANDS - Total</b> | <b>96.93</b> | <b>133.71</b> | <b>134.38</b> | <b>106.74</b> | <b>471.76</b> |

**STATE: VT - VERMONT**

| REGISTRANT ZIP CODE 3       | 1ST QUARTER     | 2ND QUARTER     | 3RD QUARTER     | 4TH QUARTER     | TOTAL GRAMS      |
|-----------------------------|-----------------|-----------------|-----------------|-----------------|------------------|
| 050                         | 1,012.96        | 952.61          | 881.83          | 1,001.13        | 3,848.53         |
| 051                         | 511.31          | 418.28          | 537.03          | 428.87          | 1,895.48         |
| 052                         | 424.57          | 384.24          | 446.01          | 436.09          | 1,690.91         |
| 053                         | 617.70          | 638.18          | 542.96          | 550.75          | 2,349.59         |
| 054                         | 3,899.80        | 3,961.33        | 3,696.45        | 3,489.03        | 15,046.61        |
| 056                         | 830.46          | 684.71          | 627.68          | 669.27          | 2,812.11         |
| 057                         | 1,504.25        | 1,560.66        | 1,489.35        | 1,472.60        | 6,026.86         |
| 058                         | 783.31          | 802.65          | 691.26          | 788.79          | 3,066.02         |
| <b>VT - VERMONT - Total</b> | <b>9,584.36</b> | <b>9,402.67</b> | <b>8,912.58</b> | <b>8,836.52</b> | <b>36,736.12</b> |

**STATE: WA - WASHINGTON**

| REGISTRANT ZIP CODE 3 | 1ST QUARTER | 2ND QUARTER | 3RD QUARTER | 4TH QUARTER | TOTAL GRAMS |
|-----------------------|-------------|-------------|-------------|-------------|-------------|
| 980                   | 13,840.49   | 13,289.94   | 12,338.49   | 12,078.90   | 51,547.82   |
| 981                   | 10,103.52   | 10,043.34   | 8,983.72    | 8,546.86    | 37,677.44   |
| 982                   | 10,763.67   | 10,855.08   | 10,923.24   | 9,774.35    | 42,316.35   |
| 983                   | 10,992.83   | 10,779.16   | 10,953.75   | 10,599.39   | 43,325.13   |
| 984                   | 6,500.27    | 6,077.83    | 5,573.85    | 5,574.17    | 23,726.13   |
| 985                   | 5,921.12    | 5,760.76    | 5,635.57    | 5,616.89    | 22,934.34   |

|                                |                  |                  |                  |                  |                   |
|--------------------------------|------------------|------------------|------------------|------------------|-------------------|
| 986                            | 12,690.12        | 11,801.77        | 12,153.47        | 11,151.69        | 47,797.06         |
| 988                            | 2,821.10         | 2,832.25         | 2,673.38         | 2,622.41         | 10,949.14         |
| 989                            | 3,229.23         | 3,064.61         | 2,744.50         | 2,692.32         | 11,730.66         |
| 990                            | 1,609.75         | 1,546.63         | 1,451.17         | 1,525.19         | 6,132.74          |
| 991                            | 2,167.90         | 2,195.03         | 1,902.15         | 1,854.17         | 8,119.26          |
| 992                            | 9,558.57         | 9,675.20         | 8,553.62         | 8,458.52         | 36,245.91         |
| 993                            | 5,298.69         | 5,062.15         | 4,534.85         | 4,170.71         | 19,066.40         |
| 994                            | 924.00           | 1,117.88         | 1,022.52         | 945.62           | 4,010.01          |
| <b>WA - WASHINGTON - Total</b> | <b>96,421.27</b> | <b>94,101.65</b> | <b>89,444.28</b> | <b>85,611.21</b> | <b>365,578.40</b> |

**STATE: WI - WISCONSIN**

| REGISTRANT ZIP CODE 3         | 1ST QUARTER      | 2ND QUARTER      | 3RD QUARTER      | 4TH QUARTER      | TOTAL GRAMS       |
|-------------------------------|------------------|------------------|------------------|------------------|-------------------|
| 530                           | 7,608.91         | 7,522.66         | 7,007.30         | 7,248.94         | 29,387.81         |
| 531                           | 7,592.73         | 7,509.60         | 6,486.11         | 6,501.57         | 28,090.02         |
| 532                           | 11,990.73        | 10,838.44        | 10,158.08        | 9,788.04         | 42,775.29         |
| 534                           | 1,441.84         | 1,406.68         | 1,341.45         | 1,293.03         | 5,483.00          |
| 535                           | 7,438.31         | 7,033.25         | 6,726.26         | 6,286.55         | 27,484.37         |
| 537                           | 5,987.26         | 5,857.90         | 5,228.00         | 5,196.25         | 22,269.40         |
| 538                           | 633.30           | 627.73           | 578.93           | 657.50           | 2,497.45          |
| 539                           | 3,279.74         | 3,199.88         | 3,064.71         | 3,262.93         | 12,807.25         |
| 540                           | 938.32           | 949.31           | 894.36           | 850.90           | 3,632.90          |
| 541                           | 1,202.16         | 1,179.98         | 1,175.22         | 1,154.95         | 4,712.30          |
| 542                           | 1,051.76         | 1,109.37         | 1,093.19         | 1,022.88         | 4,277.19          |
| 543                           | 2,192.40         | 1,850.72         | 1,719.26         | 1,888.30         | 7,650.68          |
| 544                           | 3,060.10         | 2,930.05         | 2,897.27         | 2,886.07         | 11,773.48         |
| 545                           | 856.17           | 864.17           | 845.60           | 838.19           | 3,404.14          |
| 546                           | 3,206.19         | 3,159.65         | 2,922.21         | 2,848.76         | 12,136.81         |
| 547                           | 2,473.39         | 2,373.82         | 2,325.07         | 2,330.25         | 9,502.54          |
| 548                           | 1,944.13         | 1,907.62         | 1,961.77         | 1,900.56         | 7,714.08          |
| 549                           | 5,416.58         | 5,477.30         | 4,920.51         | 5,141.69         | 20,956.07         |
| <b>WI - WISCONSIN - Total</b> | <b>68,314.02</b> | <b>65,798.11</b> | <b>61,345.30</b> | <b>61,097.36</b> | <b>256,554.79</b> |

**STATE: WV - WEST VIRGINIA**

| REGISTRANT ZIP CODE 3 | 1ST QUARTER | 2ND QUARTER | 3RD QUARTER | 4TH QUARTER | TOTAL GRAMS |
|-----------------------|-------------|-------------|-------------|-------------|-------------|
| 247                   | 568.89      | 620.92      | 575.20      | 591.44      | 2,356.45    |
| 248                   | 189.79      | 208.36      | 145.10      | 223.68      | 766.93      |
| 249                   | 399.73      | 364.25      | 403.18      | 269.49      | 1,436.64    |
| 250                   | 590.02      | 538.96      | 407.13      | 511.74      | 2,047.85    |
| 251                   | 232.55      | 352.68      | 288.76      | 266.28      | 1,140.28    |
| 252                   | 485.07      | 469.60      | 347.13      | 408.10      | 1,709.91    |
| 253                   | 1,280.45    | 1,080.51    | 1,115.34    | 1,034.44    | 4,510.74    |
| 254                   | 3,247.63    | 3,102.35    | 3,424.42    | 2,575.85    | 12,350.24   |

|                                   |                  |                  |                  |                  |                  |
|-----------------------------------|------------------|------------------|------------------|------------------|------------------|
| 255                               | 909.12           | 857.11           | 818.02           | 807.40           | 3,391.66         |
| 256                               | 322.52           | 312.31           | 377.43           | 278.34           | 1,290.61         |
| 257                               | 1,235.85         | 1,077.68         | 960.15           | 1,083.05         | 4,356.74         |
| 258                               | 977.78           | 979.96           | 972.45           | 896.23           | 3,826.42         |
| 259                               | 270.49           | 195.97           | 185.50           | 218.42           | 870.37           |
| 260                               | 1,922.00         | 1,591.62         | 1,590.00         | 1,703.21         | 6,806.83         |
| 261                               | 832.07           | 1,063.06         | 871.68           | 955.99           | 3,722.80         |
| 262                               | 731.76           | 561.59           | 591.21           | 604.13           | 2,488.68         |
| 263                               | 1,583.21         | 1,500.82         | 1,359.16         | 1,396.82         | 5,840.01         |
| 264                               | 354.61           | 360.24           | 379.57           | 362.95           | 1,457.38         |
| 265                               | 1,661.62         | 1,468.24         | 1,491.53         | 1,362.31         | 5,983.70         |
| 266                               | 431.36           | 459.74           | 375.69           | 326.32           | 1,593.11         |
| 267                               | 546.02           | 577.08           | 524.49           | 504.22           | 2,151.80         |
| 268                               | 242.35           | 269.89           | 339.61           | 303.73           | 1,155.58         |
| <b>WV - WEST VIRGINIA - Total</b> | <b>19,014.89</b> | <b>18,012.96</b> | <b>17,542.76</b> | <b>16,684.12</b> | <b>71,254.72</b> |

**STATE: WY - WYOMING**

| REGISTRANT ZIP CODE 3       | 1ST QUARTER     | 2ND QUARTER     | 3RD QUARTER     | 4TH QUARTER     | TOTAL GRAMS      |
|-----------------------------|-----------------|-----------------|-----------------|-----------------|------------------|
| 820                         | 1,547.70        | 1,326.28        | 1,378.57        | 1,081.79        | 5,334.35         |
| 822                         | 342.71          | 246.66          | 236.22          | 235.23          | 1,060.82         |
| 823                         | 128.53          | 95.67           | 114.95          | 106.69          | 445.84           |
| 824                         | 841.50          | 776.88          | 766.03          | 697.06          | 3,081.47         |
| 825                         | 625.48          | 646.77          | 620.99          | 519.44          | 2,412.68         |
| 826                         | 1,181.16        | 1,191.95        | 1,246.55        | 1,020.83        | 4,640.49         |
| 827                         | 352.44          | 401.41          | 322.33          | 346.97          | 1,423.15         |
| 828                         | 985.76          | 880.87          | 902.28          | 975.67          | 3,744.58         |
| 829                         | 2,018.60        | 1,931.78        | 1,557.52        | 1,574.74        | 7,082.64         |
| 830                         | 76.72           | 81.33           | 74.85           | 86.01           | 318.91           |
| 831                         | 247.26          | 271.77          | 209.19          | 214.09          | 942.30           |
| <b>WY - WYOMING - Total</b> | <b>8,347.86</b> | <b>7,851.37</b> | <b>7,429.48</b> | <b>6,858.52</b> | <b>30,487.23</b> |

**DRUG: 9652 - OXYMORPHONE****STATE: AK - ALASKA**

| REGISTRANT ZIP CODE 3      | 1ST QUARTER   | 2ND QUARTER   | 3RD QUARTER   | 4TH QUARTER  | TOTAL GRAMS   |
|----------------------------|---------------|---------------|---------------|--------------|---------------|
| 995                        | 76.01         | 59.24         | 54.86         | 36.04        | 226.15        |
| 996                        | 79.66         | 85.91         | 48.62         | 53.53        | 267.72        |
| 997                        | 10.17         | 8.92          | 18.73         | 4.28         | 42.11         |
| 998                        | 0             | 0             | 0.54          | 0            | 0.54          |
| 999                        | 2.14          | 4.28          | 0             | 0            | 6.42          |
| <b>AK - ALASKA - Total</b> | <b>167.98</b> | <b>158.35</b> | <b>122.75</b> | <b>93.85</b> | <b>542.93</b> |

**STATE: AL - ALABAMA**

| REGISTRANT ZIP CODE 3 | 1ST QUARTER | 2ND QUARTER | 3RD QUARTER | 4TH QUARTER | TOTAL GRAMS |
|-----------------------|-------------|-------------|-------------|-------------|-------------|
|-----------------------|-------------|-------------|-------------|-------------|-------------|

|                             |                 |                 |                 |                 |                 |
|-----------------------------|-----------------|-----------------|-----------------|-----------------|-----------------|
| 350                         | 215.31          | 143.63          | 123.47          | 112.72          | 595.12          |
| 351                         | 129.18          | 111.56          | 93.27           | 102.46          | 436.46          |
| 352                         | 86.44           | 74.27           | 77.70           | 84.44           | 322.85          |
| 354                         | 67.93           | 73.96           | 93.72           | 82.03           | 317.63          |
| 355                         | 88.27           | 73.33           | 81.72           | 62.63           | 305.95          |
| 356                         | 146.62          | 172.18          | 134.53          | 129.53          | 582.85          |
| 357                         | 143.54          | 121.68          | 93.05           | 90.19           | 448.46          |
| 358                         | 197.51          | 173.60          | 148.40          | 150.23          | 669.74          |
| 359                         | 402.02          | 391.85          | 353.27          | 370.58          | 1,517.73        |
| 360                         | 33.45           | 32.25           | 27.03           | 33.23           | 125.96          |
| 361                         | 24.98           | 28.64           | 13.20           | 26.58           | 93.40           |
| 362                         | 116.42          | 107.50          | 106.78          | 112.05          | 442.75          |
| 363                         | 61.38           | 58.97           | 61.29           | 61.29           | 242.92          |
| 364                         | 21.05           | 18.47           | 18.20           | 13.02           | 70.74           |
| 365                         | 222.04          | 214.01          | 184.31          | 157.37          | 777.73          |
| 366                         | 226.24          | 178.60          | 149.96          | 164.32          | 719.12          |
| 367                         | 12.49           | 15.57           | 7.36            | 6.82            | 42.24           |
| 368                         | 174.58          | 167.63          | 169.50          | 188.68          | 700.39          |
| 369                         | 14.90           | 8.21            | 6.07            | 9.99            | 39.16           |
| <b>AL - ALABAMA - Total</b> | <b>2,384.36</b> | <b>2,165.88</b> | <b>1,942.82</b> | <b>1,958.16</b> | <b>8,451.22</b> |

**STATE: AR - ARKANSAS**

| REGISTRANT ZIP CODE 3        | 1ST QUARTER   | 2ND QUARTER   | 3RD QUARTER   | 4TH QUARTER   | TOTAL GRAMS     |
|------------------------------|---------------|---------------|---------------|---------------|-----------------|
| 716                          | 23.64         | 14.27         | 10.17         | 8.92          | 57.01           |
| 717                          | 23.37         | 16.91         | 11.33         | 11.86         | 63.47           |
| 718                          | 2.14          | 0             | 0             | 0             | 2.14            |
| 719                          | 40.90         | 23.60         | 11.33         | 11.24         | 87.07           |
| 720                          | 128.55        | 102.73        | 97.55         | 81.14         | 409.96          |
| 721                          | 101.92        | 83.81         | 60.08         | 28.19         | 274.01          |
| 722                          | 66.55         | 52.99         | 30.78         | 31.58         | 181.90          |
| 723                          | 9.63          | 9.99          | 4.73          | 7.32          | 31.67           |
| 724                          | 30.06         | 30.15         | 13.11         | 10.79         | 84.13           |
| 725                          | 21.05         | 20.25         | 12.49         | 18.11         | 71.90           |
| 726                          | 9.19          | 6.78          | 13.02         | 3.03          | 32.03           |
| 727                          | 176.41        | 124.76        | 133.37        | 118.47        | 553.01          |
| 728                          | 15.97         | 5.89          | 0             | 0             | 21.86           |
| 729                          | 60.75         | 39.25         | 33.36         | 37.83         | 171.19          |
| <b>AR - ARKANSAS - Total</b> | <b>710.16</b> | <b>531.38</b> | <b>431.33</b> | <b>368.48</b> | <b>2,041.35</b> |

**STATE: AZ - ARIZONA**

| REGISTRANT ZIP CODE 3 | 1ST QUARTER | 2ND QUARTER | 3RD QUARTER | 4TH QUARTER | TOTAL GRAMS |
|-----------------------|-------------|-------------|-------------|-------------|-------------|
| 850                   | 547.30      | 425.84      | 425.80      | 383.38      | 1,782.33    |

|                             |                 |                 |                 |                 |                 |
|-----------------------------|-----------------|-----------------|-----------------|-----------------|-----------------|
| 851                         | 89.66           | 50.40           | 43.80           | 44.20           | 228.07          |
| 852                         | 823.99          | 786.25          | 800.08          | 563.63          | 2,973.95        |
| 853                         | 545.30          | 455.42          | 388.02          | 394.75          | 1,783.49        |
| 855                         | 57.36           | 43.18           | 50.05           | 37.38           | 187.97          |
| 856                         | 64.90           | 53.70           | 44.96           | 44.25           | 207.81          |
| 857                         | 373.06          | 240.29          | 219.95          | 200.77          | 1,034.06        |
| 859                         | 9.05            | 12.76           | 15.70           | 12.58           | 50.09           |
| 860                         | 32.29           | 29.97           | 25.60           | 20.16           | 108.03          |
| 863                         | 95.54           | 48.35           | 57.09           | 42.55           | 243.54          |
| 864                         | 36.67           | 38.00           | 22.84           | 20.96           | 118.47          |
| <b>AZ - ARIZONA - Total</b> | <b>2,675.12</b> | <b>2,184.17</b> | <b>2,093.89</b> | <b>1,764.62</b> | <b>8,717.81</b> |

**STATE: CA - CALIFORNIA**

| REGISTRANT ZIP CODE 3 | 1ST QUARTER | 2ND QUARTER | 3RD QUARTER | 4TH QUARTER | TOTAL GRAMS |
|-----------------------|-------------|-------------|-------------|-------------|-------------|
| 900                   | 388.96      | 280.57      | 309.29      | 312.77      | 1,291.58    |
| 902                   | 216.16      | 203.84      | 180.11      | 175.30      | 775.41      |
| 903                   | 30.33       | 9.81        | 33.01       | 24.98       | 98.13       |
| 904                   | 63.61       | 37.47       | 43.00       | 58.34       | 202.42      |
| 905                   | 7.94        | 8.65        | 19.98       | 17.40       | 53.97       |
| 906                   | 42.82       | 31.22       | 28.81       | 32.92       | 135.78      |
| 907                   | 91.53       | 66.10       | 29.80       | 27.66       | 215.09      |
| 908                   | 63.07       | 87.07       | 39.70       | 56.29       | 246.13      |
| 910                   | 5.71        | 11.78       | 13.74       | 16.59       | 47.82       |
| 911                   | 96.88       | 94.92       | 81.54       | 76.72       | 350.06      |
| 912                   | 35.86       | 32.74       | 31.13       | 21.14       | 120.88      |
| 913                   | 264.51      | 237.12      | 186.63      | 184.75      | 873.01      |
| 914                   | 163.08      | 178.60      | 184.40      | 172.53      | 698.60      |
| 915                   | 10.97       | 7.85        | 8.21        | 4.46        | 31.49       |
| 916                   | 13.78       | 12.13       | 4.46        | 17.49       | 47.86       |
| 917                   | 173.60      | 165.48      | 153.26      | 156.83      | 649.18      |
| 918                   | 0           | 0           | 0           | 0.45        | 0.45        |
| 919                   | 89.39       | 85.73       | 71.86       | 75.47       | 322.45      |
| 920                   | 650.39      | 695.61      | 519.43      | 511.62      | 2,377.05    |
| 921                   | 267.72      | 163.79      | 135.42      | 134.80      | 701.73      |
| 922                   | 164.50      | 139.97      | 152.46      | 125.34      | 582.27      |
| 923                   | 111.47      | 99.29       | 85.11       | 57.72       | 353.58      |
| 924                   | 36.58       | 26.67       | 23.19       | 28.64       | 115.08      |
| 925                   | 77.88       | 50.05       | 51.21       | 76.19       | 255.32      |
| 926                   | 392.35      | 335.16      | 373.30      | 346.36      | 1,447.16    |
| 927                   | 37.74       | 28.55       | 27.88       | 32.16       | 126.32      |
| 928                   | 270.48      | 214.55      | 216.33      | 191.98      | 893.35      |

|                                |                 |                 |                 |                 |                  |
|--------------------------------|-----------------|-----------------|-----------------|-----------------|------------------|
| 930                            | 174.32          | 138.54          | 153.89          | 79.49           | 546.23           |
| 931                            | 2.68            | 1.78            | 0.89            | 0.89            | 6.24             |
| 932                            | 67.89           | 55.49           | 66.42           | 87.25           | 277.04           |
| 933                            | 9.10            | 11.15           | 14.27           | 3.12            | 37.65            |
| 934                            | 156.92          | 136.05          | 127.12          | 147.82          | 567.91           |
| 935                            | 101.39          | 67.62           | 64.94           | 62.54           | 296.49           |
| 936                            | 267.59          | 225.61          | 172.58          | 159.11          | 824.88           |
| 937                            | 291.72          | 292.88          | 331.50          | 271.64          | 1,187.74         |
| 939                            | 15.17           | 24.35           | 21.14           | 5.00            | 65.66            |
| 940                            | 215.44          | 190.11          | 217.05          | 219.64          | 842.23           |
| 941                            | 89.66           | 48.71           | 52.54           | 48.53           | 239.44           |
| 943                            | 10.53           | 8.92            | 5.80            | 11.86           | 37.11            |
| 944                            | 63.07           | 30.96           | 28.37           | 33.90           | 156.30           |
| 945                            | 549.31          | 429.14          | 425.93          | 354.12          | 1,758.51         |
| 946                            | 1.34            | 2.23            | 0.71            | 1.74            | 6.02             |
| 947                            | 1.61            | 0               | 0.80            | 0.27            | 2.68             |
| 948                            | 2.05            | 0               | 0               | 0.45            | 2.50             |
| 949                            | 76.41           | 65.66           | 52.90           | 64.94           | 259.91           |
| 950                            | 111.78          | 92.42           | 88.41           | 86.09           | 378.70           |
| 951                            | 40.14           | 29.75           | 21.10           | 22.12           | 113.12           |
| 952                            | 57.54           | 38.81           | 45.05           | 27.74           | 169.14           |
| 953                            | 120.52          | 88.94           | 92.96           | 108.03          | 410.46           |
| 954                            | 105.45          | 75.03           | 88.59           | 55.31           | 324.37           |
| 955                            | 30.78           | 34.61           | 29.35           | 36.67           | 131.41           |
| 956                            | 143.45          | 123.91          | 122.40          | 85.20           | 474.95           |
| 957                            | 41.93           | 29.44           | 15.25           | 14.10           | 100.72           |
| 958                            | 119.99          | 95.95           | 63.34           | 51.03           | 330.30           |
| 959                            | 117.85          | 110.98          | 78.33           | 78.06           | 385.21           |
| 960                            | 24.09           | 24.98           | 20.25           | 21.37           | 90.68            |
| 961                            | 11.95           | 1.61            | 3.75            | 3.48            | 20.79            |
| <b>CA - CALIFORNIA - Total</b> | <b>6,788.93</b> | <b>5,780.36</b> | <b>5,408.89</b> | <b>5,078.37</b> | <b>23,056.55</b> |

**STATE: CO - COLORADO**

| REGISTRANT ZIP CODE 3 | 1ST QUARTER | 2ND QUARTER | 3RD QUARTER | 4TH QUARTER | TOTAL GRAMS |
|-----------------------|-------------|-------------|-------------|-------------|-------------|
| 800                   | 243.10      | 218.30      | 207.23      | 243.77      | 912.40      |
| 801                   | 335.34      | 294.57      | 281.55      | 276.28      | 1,187.74    |
| 802                   | 333.56      | 302.02      | 266.29      | 231.01      | 1,132.88    |
| 803                   | 46.21       | 46.75       | 40.50       | 40.23       | 173.69      |
| 804                   | 22.03       | 18.38       | 32.29       | 19.63       | 92.33       |
| 805                   | 195.68      | 190.42      | 148.76      | 121.59      | 656.45      |
| 806                   | 86.80       | 78.77       | 71.32       | 69.32       | 306.21      |



|                              |                 |                 |                 |                 |                 |
|------------------------------|-----------------|-----------------|-----------------|-----------------|-----------------|
| 807                          | 14.94           | 11.02           | 14.50           | 12.98           | 53.44           |
| 808                          | 40.50           | 32.74           | 39.74           | 35.86           | 148.85          |
| 809                          | 176.99          | 161.02          | 119.63          | 130.43          | 588.07          |
| 810                          | 51.65           | 39.61           | 49.51           | 42.24           | 183.01          |
| 811                          | 3.57            | 2.68            | 3.57            | 1.78            | 11.60           |
| 812                          | 13.56           | 11.78           | 11.24           | 9.99            | 46.57           |
| 813                          | 5.35            | 2.23            | 1.78            | 1.78            | 11.15           |
| 814                          | 2.68            | 2.68            | 2.68            | 3.12            | 11.15           |
| 815                          | 23.37           | 7.05            | 7.32            | 5.35            | 43.09           |
| 816                          | 8.39            | 8.47            | 14.72           | 7.67            | 39.25           |
| <b>CO - COLORADO - Total</b> | <b>1,603.73</b> | <b>1,428.48</b> | <b>1,312.64</b> | <b>1,253.04</b> | <b>5,597.88</b> |

**STATE: CT - CONNECTICUT**

| REGISTRANT ZIP CODE 3           | 1ST QUARTER     | 2ND QUARTER     | 3RD QUARTER     | 4TH QUARTER     | TOTAL GRAMS     |
|---------------------------------|-----------------|-----------------|-----------------|-----------------|-----------------|
| 060                             | 189.30          | 176.50          | 191.44          | 176.90          | 734.15          |
| 061                             | 38.09           | 25.87           | 21.59           | 48.98           | 134.53          |
| 062                             | 46.30           | 26.58           | 39.88           | 24.62           | 137.38          |
| 063                             | 67.71           | 53.97           | 63.96           | 59.59           | 245.24          |
| 064                             | 494.31          | 546.46          | 479.59          | 486.86          | 2,007.23        |
| 065                             | 199.65          | 223.07          | 178.46          | 180.16          | 781.35          |
| 066                             | 125.88          | 146.57          | 116.15          | 94.29           | 482.89          |
| 067                             | 90.64           | 79.53           | 61.60           | 58.79           | 290.56          |
| 068                             | 166.02          | 139.75          | 92.60           | 95.01           | 493.38          |
| 069                             | 17.13           | 16.24           | 15.34           | 18.38           | 67.09           |
| <b>CT - CONNECTICUT - Total</b> | <b>1,435.03</b> | <b>1,434.54</b> | <b>1,260.63</b> | <b>1,243.59</b> | <b>5,373.79</b> |

**STATE: DC - DISTRICT OF COLUMBIA**

| REGISTRANT ZIP CODE 3              | 1ST QUARTER  | 2ND QUARTER  | 3RD QUARTER  | 4TH QUARTER  | TOTAL GRAMS   |
|------------------------------------|--------------|--------------|--------------|--------------|---------------|
| 200                                | 98.22        | 61.02        | 50.58        | 52.05        | 261.88        |
| <b>DC - DISTRICT OF COLUMBIA -</b> | <b>98.22</b> | <b>61.02</b> | <b>50.58</b> | <b>52.05</b> | <b>261.88</b> |

**STATE: DE - DELAWARE**

| REGISTRANT ZIP CODE 3        | 1ST QUARTER     | 2ND QUARTER     | 3RD QUARTER     | 4TH QUARTER     | TOTAL GRAMS     |
|------------------------------|-----------------|-----------------|-----------------|-----------------|-----------------|
| 197                          | 595.52          | 548.02          | 463.85          | 481.02          | 2,088.41        |
| 198                          | 336.37          | 364.33          | 418.71          | 425.80          | 1,545.21        |
| 199                          | 539.14          | 574.47          | 581.74          | 540.79          | 2,236.14        |
| <b>DE - DELAWARE - Total</b> | <b>1,471.03</b> | <b>1,486.82</b> | <b>1,464.29</b> | <b>1,447.61</b> | <b>5,869.75</b> |

**STATE: FL - FLORIDA**

| REGISTRANT ZIP CODE 3 | 1ST QUARTER | 2ND QUARTER | 3RD QUARTER | 4TH QUARTER | TOTAL GRAMS |
|-----------------------|-------------|-------------|-------------|-------------|-------------|
| 320                   | 466.35      | 463.36      | 426.07      | 385.70      | 1,741.47    |
| 321                   | 202.46      | 188.41      | 170.26      | 150.81      | 711.94      |
| 322                   | 833.31      | 811.81      | 702.71      | 658.64      | 3,006.47    |
| 323                   | 283.02      | 302.73      | 256.88      | 276.95      | 1,119.59    |

|                             |                  |                  |                 |                 |                  |
|-----------------------------|------------------|------------------|-----------------|-----------------|------------------|
| 324                         | 256.84           | 220.21           | 226.91          | 215.44          | 919.40           |
| 325                         | 104.33           | 88.18            | 63.29           | 52.63           | 308.44           |
| 326                         | 301.98           | 249.56           | 242.74          | 237.83          | 1,032.12         |
| 327                         | 520.41           | 502.21           | 474.42          | 462.87          | 1,959.90         |
| 328                         | 340.69           | 294.75           | 242.25          | 236.32          | 1,114.01         |
| 329                         | 857.04           | 812.79           | 690.31          | 682.41          | 3,042.55         |
| 330                         | 513.40           | 555.56           | 580.27          | 475.76          | 2,124.98         |
| 331                         | 159.06           | 98.67            | 107.05          | 111.96          | 476.74           |
| 333                         | 541.59           | 303.67           | 281.77          | 284.85          | 1,411.88         |
| 334                         | 1,171.15         | 1,168.03         | 1,043.09        | 928.59          | 4,310.85         |
| 335                         | 331.06           | 355.55           | 285.65          | 290.29          | 1,262.54         |
| 336                         | 440.79           | 459.70           | 391.72          | 420.89          | 1,713.10         |
| 337                         | 475.58           | 481.11           | 465.14          | 483.79          | 1,905.61         |
| 338                         | 179.13           | 182.61           | 145.68          | 168.07          | 675.50           |
| 339                         | 402.02           | 338.33           | 299.52          | 213.12          | 1,253.00         |
| 341                         | 118.29           | 95.54            | 63.87           | 71.19           | 348.90           |
| 342                         | 730.14           | 654.18           | 668.27          | 642.22          | 2,694.81         |
| 344                         | 174.14           | 161.74           | 134.80          | 139.88          | 610.55           |
| 346                         | 1,119.59         | 1,013.34         | 897.27          | 895.85          | 3,926.04         |
| 347                         | 306.75           | 242.34           | 242.65          | 225.88          | 1,017.62         |
| 349                         | 591.69           | 596.32           | 534.86          | 567.20          | 2,290.07         |
| <b>FL - FLORIDA - Total</b> | <b>11,420.80</b> | <b>10,640.70</b> | <b>9,637.45</b> | <b>9,279.13</b> | <b>40,978.08</b> |

**STATE: GA - GEORGIA**

| REGISTRANT ZIP CODE 3 | 1ST QUARTER | 2ND QUARTER | 3RD QUARTER | 4TH QUARTER | TOTAL GRAMS |
|-----------------------|-------------|-------------|-------------|-------------|-------------|
| 300                   | 617.78      | 593.74      | 646.73      | 595.34      | 2,453.59    |
| 301                   | 582.14      | 552.57      | 491.50      | 513.58      | 2,139.79    |
| 302                   | 258.98      | 226.86      | 225.17      | 178.38      | 889.38      |
| 303                   | 174.05      | 149.34      | 133.82      | 148.80      | 606.00      |
| 304                   | 74.49       | 62.71       | 60.93       | 48.53       | 246.67      |
| 305                   | 245.24      | 224.63      | 207.06      | 186.18      | 863.11      |
| 306                   | 150.05      | 123.20      | 113.52      | 85.95       | 472.72      |
| 307                   | 114.46      | 87.29       | 113.16      | 90.33       | 405.24      |
| 308                   | 36.49       | 29.89       | 31.22       | 35.33       | 132.92      |
| 309                   | 32.38       | 27.30       | 25.42       | 28.73       | 113.83      |
| 310                   | 147.46      | 127.08      | 91.71       | 94.47       | 460.73      |
| 312                   | 33.54       | 51.65       | 39.16       | 45.32       | 169.68      |
| 313                   | 105.04      | 111.29      | 118.29      | 73.96       | 408.58      |
| 314                   | 42.37       | 30.42       | 26.50       | 38.00       | 137.29      |
| 315                   | 99.92       | 76.01       | 102.23      | 79.04       | 357.20      |
| 316                   | 171.10      | 137.25      | 112.94      | 117.22      | 538.52      |

|                             |                 |                 |                 |                 |                  |
|-----------------------------|-----------------|-----------------|-----------------|-----------------|------------------|
| 317                         | 120.70          | 82.47           | 83.32           | 77.03           | <b>363.53</b>    |
| 318                         | 1.78            | 2.68            | 3.57            | 5.35            | <b>13.38</b>     |
| 319                         | 167.80          | 152.64          | 123.29          | 122.57          | <b>566.31</b>    |
| 398                         | 24.27           | 17.75           | 15.52           | 13.65           | <b>71.19</b>     |
| <b>GA - GEORGIA - Total</b> | <b>3,200.05</b> | <b>2,866.76</b> | <b>2,765.06</b> | <b>2,577.77</b> | <b>11,409.65</b> |

**STATE: HI - HAWAII**

| REGISTRANT ZIP CODE 3      | 1ST QUARTER   | 2ND QUARTER   | 3RD QUARTER   | 4TH QUARTER   | TOTAL GRAMS   |
|----------------------------|---------------|---------------|---------------|---------------|---------------|
| 967                        | 158.44        | 111.69        | 115.62        | 114.10        | <b>499.84</b> |
| 968                        | 97.15         | 69.58         | 90.19         | 103.93        | <b>360.85</b> |
| <b>HI - HAWAII - Total</b> | <b>255.59</b> | <b>181.27</b> | <b>205.81</b> | <b>218.03</b> | <b>860.70</b> |

**STATE: IA - IOWA**

| REGISTRANT ZIP CODE 3    | 1ST QUARTER   | 2ND QUARTER   | 3RD QUARTER   | 4TH QUARTER   | TOTAL GRAMS     |
|--------------------------|---------------|---------------|---------------|---------------|-----------------|
| 500                      | 42.06         | 61.47         | 44.92         | 36.58         | <b>185.02</b>   |
| 501                      | 41.57         | 17.40         | 11.15         | 12.22         | <b>82.34</b>    |
| 502                      | 87.07         | 52.90         | 40.50         | 49.42         | <b>229.89</b>   |
| 503                      | 170.61        | 158.44        | 122.57        | 124.27        | <b>575.90</b>   |
| 504                      | 36.04         | 30.42         | 30.02         | 25.20         | <b>121.68</b>   |
| 505                      | 15.97         | 6.69          | 5.62          | 13.38         | <b>41.66</b>    |
| 508                      | 3.12          | 2.01          | 2.68          | 2.23          | <b>10.04</b>    |
| 510                      | 12.67         | 10.62         | 9.28          | 8.47          | <b>41.04</b>    |
| 511                      | 13.38         | 24.27         | 19.45         | 16.33         | <b>73.42</b>    |
| 513                      | 1.61          | 1.07          | 1.61          | 1.61          | <b>5.89</b>     |
| 514                      | 0             | 4.91          | 6.78          | 10.17         | <b>21.86</b>    |
| 515                      | 44.16         | 42.95         | 35.77         | 28.73         | <b>151.61</b>   |
| 520                      | 2.41          | 2.41          | 2.41          | 2.94          | <b>10.17</b>    |
| 522                      | 1.34          | 2.68          | 0.80          | 0.45          | <b>5.26</b>     |
| 523                      | 3.21          | 3.66          | 2.14          | 3.66          | <b>12.67</b>    |
| 524                      | 16.06         | 12.49         | 11.60         | 9.81          | <b>49.96</b>    |
| 525                      | 16.59         | 8.03          | 5.89          | 2.14          | <b>32.65</b>    |
| 526                      | 0             | 6.69          | 8.56          | 1.61          | <b>16.86</b>    |
| 527                      | 0.80          | 6.51          | 4.82          | 3.57          | <b>15.70</b>    |
| 528                      | 17.66         | 8.83          | 10.71         | 4.91          | <b>42.11</b>    |
| <b>IA - IOWA - Total</b> | <b>526.34</b> | <b>464.43</b> | <b>377.27</b> | <b>357.69</b> | <b>1,725.72</b> |

**STATE: ID - IDAHO**

| REGISTRANT ZIP CODE 3 | 1ST QUARTER | 2ND QUARTER | 3RD QUARTER | 4TH QUARTER | TOTAL GRAMS     |
|-----------------------|-------------|-------------|-------------|-------------|-----------------|
| 832                   | 37.96       | 43.85       | 50.31       | 38.81       | <b>170.93</b>   |
| 833                   | 78.01       | 52.95       | 44.03       | 32.65       | <b>207.64</b>   |
| 834                   | 37.91       | 28.90       | 29.97       | 32.65       | <b>129.44</b>   |
| 835                   | 24.80       | 28.55       | 32.47       | 26.67       | <b>112.49</b>   |
| 836                   | 315.94      | 316.78      | 274.72      | 307.86      | <b>1,215.31</b> |

|                           |               |               |               |               |                 |
|---------------------------|---------------|---------------|---------------|---------------|-----------------|
| 837                       | 251.22        | 224.81        | 187.97        | 183.42        | <b>847.41</b>   |
| 838                       | 51.74         | 54.95         | 49.51         | 47.10         | <b>203.31</b>   |
| <b>ID - IDAHO - Total</b> | <b>797.58</b> | <b>750.79</b> | <b>668.99</b> | <b>669.16</b> | <b>2,886.52</b> |

**STATE: IL - ILLINOIS**

| REGISTRANT ZIP CODE 3        | 1ST QUARTER     | 2ND QUARTER     | 3RD QUARTER     | 4TH QUARTER     | TOTAL GRAMS     |
|------------------------------|-----------------|-----------------|-----------------|-----------------|-----------------|
| 600                          | 652.35          | 546.23          | 558.99          | 610.02          | <b>2,367.59</b> |
| 601                          | 244.52          | 192.65          | 180.29          | 236.90          | <b>854.36</b>   |
| 602                          | 36.00           | 49.47           | 52.05           | 31.18           | <b>168.70</b>   |
| 603                          | 24.80           | 30.33           | 18.02           | 30.24           | <b>103.39</b>   |
| 604                          | 306.61          | 304.70          | 246.89          | 298.59          | <b>1,156.79</b> |
| 605                          | 190.82          | 169.99          | 173.78          | 177.80          | <b>712.39</b>   |
| 606                          | 188.95          | 168.79          | 160.71          | 136.05          | <b>654.49</b>   |
| 607                          | 16.50           | 12.58           | 10.35           | 5.98            | <b>45.41</b>    |
| 608                          | 0.54            | 0.54            | 0               | 0               | <b>1.07</b>     |
| 609                          | 11.60           | 7.58            | 8.92            | 7.14            | <b>35.24</b>    |
| 610                          | 19.89           | 23.37           | 14.54           | 25.96           | <b>83.77</b>    |
| 611                          | 21.41           | 7.23            | 13.02           | 8.56            | <b>50.23</b>    |
| 612                          | 5.89            | 3.35            | 5.58            | 2.45            | <b>17.26</b>    |
| 613                          | 34.44           | 33.45           | 49.60           | 35.51           | <b>153.00</b>   |
| 614                          | 10.71           | 0               | 10.71           | 3.57            | <b>24.98</b>    |
| 615                          | 6.24            | 16.77           | 8.74            | 11.60           | <b>43.36</b>    |
| 616                          | 12.67           | 10.62           | 8.03            | 10.79           | <b>42.11</b>    |
| 617                          | 13.83           | 9.28            | 16.06           | 11.15           | <b>50.31</b>    |
| 618                          | 12.67           | 28.64           | 17.04           | 27.83           | <b>86.18</b>    |
| 619                          | 6.02            | 6.16            | 7.76            | 5.53            | <b>25.47</b>    |
| 620                          | 33.63           | 28.90           | 22.48           | 17.84           | <b>102.86</b>   |
| 622                          | 53.88           | 47.64           | 32.65           | 27.30           | <b>161.47</b>   |
| 623                          | 20.07           | 13.83           | 13.65           | 7.76            | <b>55.31</b>    |
| 624                          | 21.32           | 24.18           | 20.16           | 12.85           | <b>78.50</b>    |
| 625                          | 3.30            | 8.65            | 4.55            | 0.71            | <b>17.22</b>    |
| 626                          | 21.95           | 16.41           | 19.27           | 22.30           | <b>79.93</b>    |
| 627                          | 42.20           | 32.83           | 31.58           | 22.21           | <b>128.82</b>   |
| 628                          | 16.06           | 2.14            | 6.47            | 0               | <b>24.67</b>    |
| 629                          | 59.37           | 35.42           | 33.90           | 27.03           | <b>155.72</b>   |
| <b>IL - ILLINOIS - Total</b> | <b>2,088.23</b> | <b>1,831.70</b> | <b>1,745.80</b> | <b>1,814.84</b> | <b>7,480.57</b> |

**STATE: IN - INDIANA**

| REGISTRANT ZIP CODE 3 | 1ST QUARTER | 2ND QUARTER | 3RD QUARTER | 4TH QUARTER | TOTAL GRAMS     |
|-----------------------|-------------|-------------|-------------|-------------|-----------------|
| 460                   | 126.81      | 105.45      | 95.50       | 130.56      | <b>458.32</b>   |
| 461                   | 242.21      | 208.31      | 311.21      | 281.59      | <b>1,043.31</b> |
| 462                   | 504.84      | 445.87      | 354.21      | 275.97      | <b>1,580.89</b> |

|                             |                 |                 |                 |                 |                 |
|-----------------------------|-----------------|-----------------|-----------------|-----------------|-----------------|
| 463                         | 234.00          | 199.38          | 163.34          | 163.34          | 760.07          |
| 464                         | 1.52            | 7.14            | 4.82            | 2.14            | 15.61           |
| 465                         | 185.38          | 187.79          | 158.66          | 145.23          | 677.06          |
| 466                         | 35.15           | 21.86           | 31.05           | 21.95           | 110.00          |
| 467                         | 47.82           | 43.27           | 47.46           | 43.71           | 182.26          |
| 468                         | 61.02           | 47.82           | 54.02           | 37.11           | 199.96          |
| 469                         | 58.25           | 35.24           | 46.84           | 47.50           | 187.83          |
| 470                         | 67.62           | 68.78           | 68.51           | 66.64           | 271.56          |
| 471                         | 159.33          | 115.35          | 80.38           | 74.04           | 429.10          |
| 472                         | 67.71           | 43.00           | 29.62           | 59.50           | 199.83          |
| 473                         | 92.06           | 94.29           | 81.76           | 95.72           | 363.84          |
| 474                         | 69.05           | 78.86           | 107.41          | 92.06           | 347.38          |
| 475                         | 66.91           | 56.92           | 61.11           | 48.80           | 233.73          |
| 476                         | 68.69           | 53.62           | 73.15           | 59.59           | 255.05          |
| 477                         | 181.90          | 138.63          | 127.39          | 106.96          | 554.89          |
| 478                         | 177.53          | 194.30          | 157.54          | 147.55          | 676.93          |
| 479                         | 55.85           | 72.62           | 52.63           | 42.82           | 223.92          |
| <b>IN - INDIANA - Total</b> | <b>2,503.63</b> | <b>2,218.47</b> | <b>2,106.60</b> | <b>1,942.82</b> | <b>8,771.53</b> |

**STATE: KS - KANSAS**

| REGISTRANT ZIP CODE 3      | 1ST QUARTER   | 2ND QUARTER   | 3RD QUARTER   | 4TH QUARTER   | TOTAL GRAMS     |
|----------------------------|---------------|---------------|---------------|---------------|-----------------|
| 660                        | 240.60        | 212.94        | 231.95        | 237.48        | 922.97          |
| 661                        | 92.78         | 83.05         | 40.95         | 76.90         | 293.68          |
| 662                        | 145.90        | 133.82        | 146.80        | 122.57        | 549.09          |
| 664                        | 17.31         | 23.02         | 30.33         | 27.74         | 98.40           |
| 665                        | 13.38         | 11.78         | 7.85          | 13.83         | 46.84           |
| 666                        | 37.65         | 38.09         | 24.18         | 30.60         | 130.51          |
| 667                        | 30.87         | 22.66         | 27.74         | 22.48         | 103.75          |
| 668                        | 8.03          | 4.46          | 4.46          | 5.35          | 22.30           |
| 669                        | 0.80          | 1.07          | 0.80          | 5.35          | 8.03            |
| 670                        | 55.76         | 71.46         | 55.49         | 47.10         | 229.80          |
| 671                        | 24.80         | 14.01         | 13.38         | 12.49         | 64.68           |
| 672                        | 102.32        | 103.39        | 78.77         | 78.50         | 363.00          |
| 673                        | 10.53         | 2.68          | 4.01          | 0             | 17.22           |
| 674                        | 22.93         | 27.57         | 24.18         | 26.41         | 101.07          |
| 675                        | 41.13         | 35.51         | 21.68         | 21.59         | 119.90          |
| 676                        | 22.30         | 19.80         | 13.92         | 14.27         | 70.30           |
| 677                        | 0.89          | 0.45          | 0             | 0             | 1.34            |
| 678                        | 17.31         | 13.92         | 17.93         | 14.99         | 64.14           |
| 679                        | 3.21          | 3.21          | 1.07          | 3.21          | 10.71           |
| <b>KS - KANSAS - Total</b> | <b>888.49</b> | <b>822.87</b> | <b>745.48</b> | <b>760.87</b> | <b>3,217.72</b> |

**STATE: KY - KENTUCKY**

| REGISTRANT ZIP CODE 3        | 1ST QUARTER     | 2ND QUARTER     | 3RD QUARTER     | 4TH QUARTER     | TOTAL GRAMS     |
|------------------------------|-----------------|-----------------|-----------------|-----------------|-----------------|
| 400                          | 38.85           | 33.72           | 19.54           | 19.36           | 111.47          |
| 401                          | 56.02           | 24.35           | 11.42           | 10.35           | 102.15          |
| 402                          | 231.72          | 187.52          | 177.62          | 172.04          | 768.90          |
| 403                          | 210.58          | 200.45          | 165.57          | 143.94          | 720.55          |
| 404                          | 101.70          | 104.69          | 74.31           | 64.90           | 345.60          |
| 405                          | 141.13          | 128.19          | 116.06          | 100.18          | 485.57          |
| 406                          | 6.38            | 8.83            | 6.07            | 6.42            | 27.70           |
| 407                          | 262.81          | 238.50          | 253.18          | 266.02          | 1,020.52        |
| 408                          | 12.04           | 8.92            | 7.58            | 5.00            | 33.54           |
| 409                          | 106.83          | 140.77          | 138.36          | 122.04          | 508.01          |
| 410                          | 153.93          | 131.05          | 111.96          | 125.34          | 522.28          |
| 411                          | 67.22           | 69.23           | 56.38           | 61.02           | 253.85          |
| 412                          | 7.49            | 6.69            | 14.59           | 8.30            | 37.07           |
| 413                          | 5.62            | 4.55            | 4.01            | 4.01            | 18.20           |
| 414                          | 4.55            | 4.95            | 6.02            | 4.15            | 19.67           |
| 415                          | 85.37           | 81.63           | 73.87           | 69.72           | 310.58          |
| 416                          | 73.60           | 64.45           | 72.75           | 72.30           | 283.11          |
| 417                          | 17.80           | 11.29           | 6.20            | 8.03            | 43.31           |
| 418                          | 0.80            | 1.07            | 2.01            | 0.80            | 4.68            |
| 420                          | 53.53           | 44.87           | 39.52           | 28.28           | 166.20          |
| 421                          | 109.95          | 121.77          | 100.14          | 91.89           | 423.75          |
| 422                          | 115.26          | 73.46           | 65.84           | 68.16           | 322.72          |
| 423                          | 19.89           | 12.31           | 12.04           | 9.46            | 53.70           |
| 424                          | 46.21           | 39.70           | 36.75           | 21.95           | 144.61          |
| 425                          | 47.91           | 50.54           | 49.07           | 56.20           | 203.71          |
| 426                          | 18.60           | 11.55           | 9.95            | 9.63            | 49.73           |
| 427                          | 124.98          | 102.01          | 98.67           | 82.21           | 407.87          |
| <b>KY - KENTUCKY - Total</b> | <b>2,120.79</b> | <b>1,907.09</b> | <b>1,729.47</b> | <b>1,631.70</b> | <b>7,389.04</b> |

**STATE: LA - LOUISIANA**

| REGISTRANT ZIP CODE 3 | 1ST QUARTER | 2ND QUARTER | 3RD QUARTER | 4TH QUARTER | TOTAL GRAMS |
|-----------------------|-------------|-------------|-------------|-------------|-------------|
| 700                   | 502.03      | 460.23      | 444.44      | 438.73      | 1,845.44    |
| 701                   | 117.44      | 166.64      | 190.60      | 216.78      | 691.47      |
| 703                   | 159.60      | 148.71      | 185.02      | 127.17      | 620.50      |
| 704                   | 623.80      | 621.21      | 565.01      | 570.32      | 2,380.35    |
| 705                   | 362.01      | 324.90      | 297.34      | 229.89      | 1,214.15    |
| 706                   | 26.58       | 38.18       | 35.55       | 32.47       | 132.79      |
| 707                   | 1,190.86    | 1,117.58    | 1,136.80    | 1,088.45    | 4,533.70    |
| 708                   | 791.52      | 712.97      | 613.14      | 580.49      | 2,698.11    |

|                               |                 |                 |                 |                 |                  |
|-------------------------------|-----------------|-----------------|-----------------|-----------------|------------------|
| 710                           | 73.06           | 40.23           | 34.08           | 39.61           | 186.98           |
| 711                           | 322.18          | 279.49          | 226.91          | 212.23          | 1,040.81         |
| 712                           | 19.80           | 17.84           | 12.31           | 16.95           | 66.91            |
| 713                           | 39.79           | 38.63           | 33.10           | 30.78           | 142.29           |
| 714                           | 13.56           | 17.13           | 13.02           | 8.83            | 52.54            |
| <b>LA - LOUISIANA - Total</b> | <b>4,242.25</b> | <b>3,983.76</b> | <b>3,787.32</b> | <b>3,592.71</b> | <b>15,606.04</b> |

**STATE: MA - MASSACHUSETTS**

| REGISTRANT ZIP CODE 3             | 1ST QUARTER     | 2ND QUARTER     | 3RD QUARTER   | 4TH QUARTER   | TOTAL GRAMS     |
|-----------------------------------|-----------------|-----------------|---------------|---------------|-----------------|
| 010                               | 49.51           | 45.23           | 52.90         | 40.59         | 188.23          |
| 011                               | 3.57            | 5.26            | 5.89          | 5.26          | 19.98           |
| 012                               | 17.13           | 19.27           | 12.85         | 12.85         | 62.09           |
| 013                               | 25.60           | 23.28           | 18.73         | 22.21         | 89.83           |
| 014                               | 5.62            | 5.89            | 3.75          | 5.62          | 20.88           |
| 015                               | 79.49           | 71.19           | 55.13         | 50.31         | 256.12          |
| 016                               | 11.78           | 6.24            | 4.46          | 7.14          | 29.62           |
| 017                               | 11.24           | 7.14            | 8.92          | 16.06         | 43.36           |
| 018                               | 222.67          | 236.58          | 220.93        | 165.98        | 846.16          |
| 019                               | 76.81           | 57.05           | 66.95         | 53.75         | 254.56          |
| 020                               | 65.93           | 51.21           | 45.50         | 49.51         | 212.14          |
| 021                               | 65.84           | 73.73           | 79.44         | 89.66         | 308.67          |
| 022                               | 37.47           | 26.67           | 28.55         | 33.90         | 126.59          |
| 023                               | 27.03           | 36.22           | 32.65         | 29.35         | 125.25          |
| 024                               | 28.73           | 24.00           | 19.36         | 23.02         | 95.10           |
| 025                               | 23.55           | 14.72           | 25.87         | 14.27         | 78.42           |
| 026                               | 31.67           | 26.94           | 12.94         | 29.44         | 100.99          |
| 027                               | 344.08          | 304.74          | 296.53        | 319.73        | 1,265.09        |
| <b>MA - MASSACHUSETTS - Total</b> | <b>1,127.70</b> | <b>1,035.37</b> | <b>991.35</b> | <b>968.64</b> | <b>4,123.06</b> |

**STATE: MD - MARYLAND**

| REGISTRANT ZIP CODE 3 | 1ST QUARTER | 2ND QUARTER | 3RD QUARTER | 4TH QUARTER | TOTAL GRAMS |
|-----------------------|-------------|-------------|-------------|-------------|-------------|
| 206                   | 872.92      | 940.41      | 889.47      | 909.23      | 3,612.02    |
| 207                   | 553.59      | 473.30      | 433.51      | 407.98      | 1,868.39    |
| 208                   | 432.01      | 379.45      | 358.85      | 287.12      | 1,457.43    |
| 209                   | 40.77       | 60.93       | 68.25       | 68.51       | 238.46      |
| 210                   | 1,083.41    | 1,067.53    | 1,012.89    | 1,037.24    | 4,201.08    |
| 211                   | 559.61      | 459.03      | 413.80      | 389.98      | 1,822.43    |
| 212                   | 678.49      | 561.49      | 551.76      | 548.95      | 2,340.69    |
| 214                   | 122.22      | 125.38      | 106.61      | 101.21      | 455.42      |
| 215                   | 240.42      | 182.17      | 172.89      | 167.89      | 763.37      |
| 216                   | 186.05      | 217.54      | 183.06      | 195.19      | 781.84      |
| 217                   | 1,329.54    | 1,145.55    | 1,152.10    | 1,173.74    | 4,800.93    |

|                              |                 |                 |                 |                 |                  |
|------------------------------|-----------------|-----------------|-----------------|-----------------|------------------|
| 218                          | 62.63           | 89.03           | 68.78           | 62.54           | <b>282.97</b>    |
| 219                          | 195.24          | 199.83          | 217.58          | 205.36          | <b>818.01</b>    |
| <b>MD - MARYLAND - Total</b> | <b>6,356.89</b> | <b>5,901.64</b> | <b>5,629.54</b> | <b>5,554.96</b> | <b>23,443.03</b> |

**STATE: ME - MAINE**

| REGISTRANT ZIP CODE 3     | 1ST QUARTER   | 2ND QUARTER   | 3RD QUARTER   | 4TH QUARTER   | TOTAL GRAMS     |
|---------------------------|---------------|---------------|---------------|---------------|-----------------|
| 040                       | 120.12        | 97.60         | 91.26         | 78.73         | <b>387.71</b>   |
| 041                       | 12.85         | 6.07          | 7.36          | 4.46          | <b>30.73</b>    |
| 042                       | 113.52        | 94.12         | 91.93         | 79.98         | <b>379.54</b>   |
| 043                       | 179.40        | 115.13        | 98.67         | 112.72        | <b>505.91</b>   |
| 044                       | 6.69          | 5.08          | 1.61          | 2.41          | <b>15.79</b>    |
| 045                       | 31.85         | 28.77         | 26.23         | 24.80         | <b>111.65</b>   |
| 046                       | 3.30          | 3.30          | 2.41          | 2.94          | <b>11.95</b>    |
| 047                       | 2.14          | 0             | 0             | 0             | <b>2.14</b>     |
| 048                       | 9.37          | 3.84          | 3.75          | 4.55          | <b>21.50</b>    |
| 049                       | 111.51        | 81.81         | 76.01         | 51.92         | <b>321.25</b>   |
| <b>ME - MAINE - Total</b> | <b>590.75</b> | <b>435.70</b> | <b>399.21</b> | <b>362.50</b> | <b>1,788.17</b> |

**STATE: MI - MICHIGAN**

| REGISTRANT ZIP CODE 3        | 1ST QUARTER      | 2ND QUARTER      | 3RD QUARTER      | 4TH QUARTER     | TOTAL GRAMS      |
|------------------------------|------------------|------------------|------------------|-----------------|------------------|
| 480                          | 3,182.97         | 2,859.85         | 2,665.77         | 2,111.20        | <b>10,819.79</b> |
| 481                          | 2,740.44         | 2,374.06         | 2,114.68         | 1,856.42        | <b>9,085.59</b>  |
| 482                          | 5,967.93         | 4,739.10         | 3,977.78         | 3,402.92        | <b>18,087.73</b> |
| 483                          | 1,148.40         | 1,149.38         | 946.12           | 841.25          | <b>4,085.15</b>  |
| 484                          | 115.71           | 80.56            | 72.62            | 84.30           | <b>353.18</b>    |
| 485                          | 102.23           | 88.14            | 77.43            | 86.80           | <b>354.61</b>    |
| 486                          | 89.34            | 77.52            | 86.04            | 65.57           | <b>318.48</b>    |
| 487                          | 29.53            | 28.90            | 28.73            | 21.77           | <b>108.93</b>    |
| 488                          | 125.79           | 110.98           | 106.96           | 101.74          | <b>445.47</b>    |
| 489                          | 74.49            | 66.91            | 58.57            | 54.24           | <b>254.20</b>    |
| 490                          | 224.41           | 192.69           | 200.90           | 186.14          | <b>804.14</b>    |
| 491                          | 32.03            | 52.54            | 31.40            | 31.22           | <b>147.20</b>    |
| 492                          | 101.97           | 81.00            | 82.34            | 88.14           | <b>353.45</b>    |
| 493                          | 40.32            | 42.46            | 30.51            | 32.65           | <b>145.95</b>    |
| 494                          | 76.19            | 75.47            | 69.49            | 74.58           | <b>295.73</b>    |
| 495                          | 54.02            | 48.44            | 48.98            | 49.15           | <b>200.59</b>    |
| 496                          | 102.41           | 118.92           | 87.07            | 106.43          | <b>414.83</b>    |
| 497                          | 131.54           | 82.92            | 73.64            | 74.36           | <b>362.46</b>    |
| 498                          | 3.57             | 5.26             | 7.40             | 2.14            | <b>18.38</b>     |
| 499                          | 0.89             | 0                | 0                | 0               | <b>0.89</b>      |
| <b>MI - MICHIGAN - Total</b> | <b>14,344.17</b> | <b>12,275.12</b> | <b>10,766.44</b> | <b>9,271.02</b> | <b>46,656.74</b> |

**STATE: MN - MINNESOTA**



| REGISTRANT ZIP CODE 3         | 1ST QUARTER   | 2ND QUARTER   | 3RD QUARTER   | 4TH QUARTER   | TOTAL GRAMS   |
|-------------------------------|---------------|---------------|---------------|---------------|---------------|
| 550                           | 37.74         | 34.08         | 35.24         | 38.27         | 145.32        |
| 551                           | 52.63         | 63.79         | 43.09         | 51.74         | 211.25        |
| 553                           | 50.67         | 40.32         | 50.58         | 41.39         | 182.97        |
| 554                           | 23.55         | 16.15         | 17.31         | 19.54         | 76.54         |
| 557                           | 10.88         | 12.94         | 14.10         | 12.67         | 50.58         |
| 558                           | 4.28          | 6.42          | 5.35          | 6.42          | 22.48         |
| 559                           | 5.62          | 0             | 4.01          | 0             | 9.63          |
| 560                           | 4.91          | 4.91          | 2.68          | 7.58          | 20.07         |
| 562                           | 0             | 1.78          | 2.23          | 1.78          | 5.80          |
| 563                           | 21.41         | 25.87         | 24.53         | 28.55         | 100.36        |
| 565                           | 3.57          | 1.78          | 0             | 1.34          | 6.69          |
| 567                           | 13.02         | 6.42          | 8.21          | 6.07          | 33.72         |
| <b>MN - MINNESOTA - Total</b> | <b>228.29</b> | <b>214.46</b> | <b>207.32</b> | <b>215.35</b> | <b>865.43</b> |

**STATE: MO - MISSOURI**

| REGISTRANT ZIP CODE 3 | 1ST QUARTER | 2ND QUARTER | 3RD QUARTER | 4TH QUARTER | TOTAL GRAMS |
|-----------------------|-------------|-------------|-------------|-------------|-------------|
| 630                   | 264.06      | 185.38      | 169.10      | 134.44      | 752.98      |
| 631                   | 513.31      | 513.76      | 391.01      | 623.40      | 2,041.48    |
| 633                   | 155.58      | 131.67      | 135.69      | 133.64      | 556.58      |
| 634                   | 54.42       | 42.73       | 32.96       | 31.05       | 161.16      |
| 635                   | 3.08        | 3.48        | 4.82        | 1.78        | 13.16       |
| 636                   | 49.96       | 33.19       | 39.92       | 49.87       | 172.93      |
| 637                   | 11.69       | 3.84        | 4.64        | 6.16        | 26.32       |
| 638                   | 5.17        | 2.32        | 2.32        | 2.68        | 12.49       |
| 639                   | 3.57        | 2.14        | 0.54        | 0           | 6.24        |
| 640                   | 133.28      | 128.60      | 121.55      | 105.36      | 488.78      |
| 641                   | 167.45      | 135.91      | 151.12      | 124.36      | 578.84      |
| 644                   | 3.75        | 1.07        | 5.35        | 4.82        | 14.99       |
| 645                   | 64.77       | 35.15       | 43.18       | 19.89       | 162.99      |
| 646                   | 19.72       | 20.96       | 22.39       | 23.02       | 86.09       |
| 647                   | 42.20       | 40.23       | 43.09       | 36.67       | 162.18      |
| 648                   | 35.51       | 21.50       | 13.65       | 4.64        | 75.29       |
| 650                   | 46.26       | 40.50       | 30.82       | 34.97       | 152.55      |
| 651                   | 50.85       | 51.03       | 31.98       | 34.52       | 168.38      |
| 652                   | 43.18       | 39.92       | 32.74       | 28.81       | 144.65      |
| 653                   | 12.85       | 2.23        | 2.68        | 1.34        | 19.09       |
| 654                   | 10.30       | 12.04       | 16.73       | 12.31       | 51.38       |
| 655                   | 22.57       | 18.20       | 37.83       | 27.12       | 105.71      |
| 656                   | 42.91       | 27.48       | 19.27       | 38.49       | 128.15      |
| 657                   | 145.72      | 114.72      | 111.16      | 82.16       | 453.77      |

|                              |                 |                 |                 |                 |                 |
|------------------------------|-----------------|-----------------|-----------------|-----------------|-----------------|
| 658                          | 118.74          | 92.06           | 96.26           | 68.96           | <b>376.02</b>   |
| <b>MO - MISSOURI - Total</b> | <b>2,020.87</b> | <b>1,700.12</b> | <b>1,560.77</b> | <b>1,630.45</b> | <b>6,912.21</b> |

**STATE: MS - MISSISSIPPI**

| REGISTRANT ZIP CODE 3           | 1ST QUARTER     | 2ND QUARTER     | 3RD QUARTER     | 4TH QUARTER     | TOTAL GRAMS     |
|---------------------------------|-----------------|-----------------|-----------------|-----------------|-----------------|
| 386                             | 79.62           | 60.62           | 57.23           | 38.14           | <b>235.60</b>   |
| 387                             | 14.63           | 4.28            | 0.54            | 0               | <b>19.45</b>    |
| 388                             | 230.65          | 204.51          | 197.73          | 187.39          | <b>820.29</b>   |
| 389                             | 21.86           | 12.31           | 9.72            | 10.62           | <b>54.51</b>    |
| 390                             | 70.92           | 49.15           | 23.73           | 37.29           | <b>181.10</b>   |
| 391                             | 43.36           | 21.50           | 24.62           | 35.24           | <b>124.72</b>   |
| 392                             | 63.74           | 50.23           | 37.07           | 34.61           | <b>185.65</b>   |
| 393                             | 43.13           | 18.20           | 18.78           | 26.50           | <b>106.61</b>   |
| 394                             | 134.22          | 68.96           | 51.47           | 103.57          | <b>358.22</b>   |
| 395                             | 964.45          | 884.96          | 814.44          | 789.37          | <b>3,453.23</b> |
| 396                             | 53.26           | 34.52           | 34.35           | 32.92           | <b>155.05</b>   |
| 397                             | 44.61           | 42.29           | 39.97           | 14.63           | <b>141.49</b>   |
| <b>MS - MISSISSIPPI - Total</b> | <b>1,764.44</b> | <b>1,451.54</b> | <b>1,309.65</b> | <b>1,310.27</b> | <b>5,835.90</b> |

**STATE: MT - MONTANA**

| REGISTRANT ZIP CODE 3       | 1ST QUARTER   | 2ND QUARTER   | 3RD QUARTER   | 4TH QUARTER   | TOTAL GRAMS   |
|-----------------------------|---------------|---------------|---------------|---------------|---------------|
| 590                         | 0             | 0             | 0             | 1.34          | <b>1.34</b>   |
| 591                         | 27.92         | 24.89         | 31.67         | 21.86         | <b>106.34</b> |
| 592                         | 0             | 0             | 1.61          | 0             | <b>1.61</b>   |
| 593                         | 0.45          | 2.23          | 0             | 0             | <b>2.68</b>   |
| 594                         | 15.52         | 22.66         | 14.18         | 11.51         | <b>63.87</b>  |
| 596                         | 3.21          | 4.82          | 10.79         | 3.30          | <b>22.12</b>  |
| 597                         | 6.96          | 2.59          | 6.42          | 2.85          | <b>18.82</b>  |
| 598                         | 11.42         | 9.81          | 10.04         | 4.10          | <b>35.37</b>  |
| 599                         | 67.80         | 58.97         | 63.70         | 75.56         | <b>266.02</b> |
| <b>MT - MONTANA - Total</b> | <b>133.28</b> | <b>125.96</b> | <b>138.41</b> | <b>120.52</b> | <b>518.18</b> |

**STATE: NC - NORTH CAROLINA**

| REGISTRANT ZIP CODE 3 | 1ST QUARTER | 2ND QUARTER | 3RD QUARTER | 4TH QUARTER | TOTAL GRAMS     |
|-----------------------|-------------|-------------|-------------|-------------|-----------------|
| 270                   | 295.64      | 218.21      | 223.47      | 194.75      | <b>932.07</b>   |
| 271                   | 285.65      | 217.32      | 198.94      | 154.51      | <b>856.42</b>   |
| 272                   | 626.43      | 506.26      | 479.15      | 490.88      | <b>2,102.72</b> |
| 273                   | 355.77      | 251.13      | 231.14      | 185.47      | <b>1,023.51</b> |
| 274                   | 248.32      | 247.33      | 237.97      | 264.86      | <b>998.48</b>   |
| 275                   | 865.34      | 719.70      | 690.35      | 751.10      | <b>3,026.49</b> |
| 276                   | 254.25      | 262.63      | 236.14      | 228.20      | <b>981.22</b>   |
| 277                   | 217.36      | 153.08      | 162.45      | 195.28      | <b>728.17</b>   |
| 278                   | 1,481.47    | 1,422.54    | 1,266.16    | 1,409.87    | <b>5,580.04</b> |

|                                    |                  |                 |                 |                 |                  |
|------------------------------------|------------------|-----------------|-----------------|-----------------|------------------|
| 279                                | 208.84           | 156.88          | 149.34          | 152.28          | 667.34           |
| 280                                | 1,380.93         | 1,376.24        | 1,320.13        | 1,354.21        | 5,431.51         |
| 281                                | 662.12           | 694.86          | 656.01          | 691.29          | 2,704.27         |
| 282                                | 488.78           | 471.92          | 428.52          | 407.24          | 1,796.47         |
| 283                                | 778.85           | 645.17          | 648.38          | 535.13          | 2,607.52         |
| 284                                | 504.30           | 455.15          | 405.68          | 357.91          | 1,723.05         |
| 285                                | 751.42           | 650.92          | 576.70          | 631.07          | 2,610.11         |
| 286                                | 1,283.38         | 1,167.89        | 1,115.48        | 1,134.80        | 4,701.55         |
| 287                                | 196.13           | 189.71          | 210.22          | 182.61          | 778.67           |
| 288                                | 23.69            | 20.07           | 17.13           | 20.30           | 81.18            |
| 289                                | 135.60           | 129.71          | 137.12          | 162.27          | 564.70           |
| <b>NC - NORTH CAROLINA - Total</b> | <b>11,044.24</b> | <b>9,956.72</b> | <b>9,390.47</b> | <b>9,504.03</b> | <b>39,895.46</b> |

**STATE: ND - NORTH DAKOTA**

| REGISTRANT ZIP CODE 3            | 1ST QUARTER  | 2ND QUARTER  | 3RD QUARTER  | 4TH QUARTER  | TOTAL GRAMS   |
|----------------------------------|--------------|--------------|--------------|--------------|---------------|
| 580                              | 0.89         | 0            | 0            | 0            | 0.89          |
| 581                              | 6.60         | 3.57         | 2.85         | 3.21         | 16.24         |
| 582                              | 0.45         | 0.45         | 1.34         | 1.43         | 3.66          |
| 583                              | 1.34         | 4.01         | 1.34         | 3.12         | 9.81          |
| 584                              | 5.35         | 2.68         | 0.89         | 0            | 8.92          |
| 585                              | 36.40        | 43.18        | 37.02        | 26.50        | 143.09        |
| 586                              | 3.21         | 3.57         | 5.35         | 6.69         | 18.82         |
| 587                              | 15.39        | 16.95        | 16.06        | 19.63        | 68.02         |
| 588                              | 12.31        | 6.42         | 6.42         | 6.42         | 31.58         |
| <b>ND - NORTH DAKOTA - Total</b> | <b>81.94</b> | <b>80.82</b> | <b>71.28</b> | <b>67.00</b> | <b>301.04</b> |

**STATE: NE - NEBRASKA**

| REGISTRANT ZIP CODE 3        | 1ST QUARTER   | 2ND QUARTER   | 3RD QUARTER   | 4TH QUARTER   | TOTAL GRAMS     |
|------------------------------|---------------|---------------|---------------|---------------|-----------------|
| 680                          | 17.84         | 17.93         | 21.77         | 20.96         | 78.50           |
| 681                          | 316.61        | 281.23        | 254.78        | 227.22        | 1,079.84        |
| 683                          | 7.49          | 1.07          | 0             | 0             | 8.56            |
| 684                          | 17.75         | 15.79         | 18.56         | 17.98         | 70.07           |
| 685                          | 153.04        | 102.73        | 109.15        | 89.75         | 454.66          |
| 686                          | 36.22         | 34.79         | 39.70         | 39.83         | 150.54          |
| 687                          | 38.00         | 44.87         | 41.66         | 38.63         | 163.17          |
| 688                          | 5.62          | 9.28          | 8.43          | 6.16          | 29.48           |
| 689                          | 3.30          | 3.21          | 2.41          | 2.41          | 11.33           |
| 691                          | 5.00          | 2.68          | 1.78          | 2.14          | 11.60           |
| 693                          | 16.95         | 12.76         | 18.51         | 8.97          | 57.18           |
| <b>NE - NEBRASKA - Total</b> | <b>617.82</b> | <b>526.34</b> | <b>516.75</b> | <b>454.03</b> | <b>2,114.95</b> |

**STATE: NH - NEW HAMPSHIRE**

| REGISTRANT ZIP CODE 3 | 1ST QUARTER | 2ND QUARTER | 3RD QUARTER | 4TH QUARTER | TOTAL GRAMS |
|-----------------------|-------------|-------------|-------------|-------------|-------------|
|-----------------------|-------------|-------------|-------------|-------------|-------------|

|                                   |               |               |               |               |                 |
|-----------------------------------|---------------|---------------|---------------|---------------|-----------------|
| 030                               | 90.64         | 125.61        | 117.13        | 84.48         | 417.86          |
| 031                               | 43.89         | 62.89         | 43.53         | 40.28         | 190.60          |
| 032                               | 53.39         | 52.14         | 54.33         | 37.91         | 197.78          |
| 033                               | 79.04         | 82.88         | 70.39         | 49.42         | 281.73          |
| 034                               | 15.97         | 5.17          | 9.10          | 4.28          | 34.52           |
| 035                               | 15.25         | 6.78          | 9.99          | 7.49          | 39.52           |
| 037                               | 5.35          | 5.53          | 1.34          | 0             | 12.22           |
| 038                               | 166.73        | 133.10        | 104.15        | 99.11         | 503.10          |
| <b>NH - NEW HAMPSHIRE - Total</b> | <b>470.27</b> | <b>474.11</b> | <b>409.96</b> | <b>322.98</b> | <b>1,677.33</b> |

**STATE: NJ - NEW JERSEY**

| REGISTRANT ZIP CODE 3          | 1ST QUARTER     | 2ND QUARTER     | 3RD QUARTER     | 4TH QUARTER     | TOTAL GRAMS      |
|--------------------------------|-----------------|-----------------|-----------------|-----------------|------------------|
| 070                            | 644.99          | 548.02          | 463.54          | 498.24          | 2,154.78         |
| 071                            | 48.89           | 59.95           | 51.21           | 40.68           | 200.72           |
| 072                            | 27.21           | 26.50           | 25.16           | 18.56           | 97.42            |
| 073                            | 14.27           | 6.78            | 6.60            | 8.39            | 36.04            |
| 074                            | 206.61          | 188.59          | 185.56          | 162.85          | 743.61           |
| 075                            | 54.60           | 52.37           | 59.77           | 77.70           | 244.44           |
| 076                            | 255.94          | 215.17          | 209.82          | 230.25          | 911.19           |
| 077                            | 348.63          | 326.15          | 321.96          | 298.14          | 1,294.88         |
| 078                            | 74.58           | 93.05           | 82.70           | 63.34           | 313.66           |
| 079                            | 92.69           | 87.25           | 76.10           | 106.12          | 362.15           |
| 080                            | 785.54          | 752.17          | 671.80          | 690.35          | 2,899.86         |
| 081                            | 65.03           | 36.13           | 36.04           | 44.78           | 181.99           |
| 082                            | 82.52           | 62.89           | 57.99           | 59.95           | 263.35           |
| 083                            | 51.47           | 46.03           | 43.36           | 37.47           | 178.33           |
| 084                            | 5.89            | 1.78            | 3.57            | 2.68            | 13.92            |
| 085                            | 143.54          | 117.31          | 74.13           | 76.90           | 411.88           |
| 086                            | 45.23           | 43.71           | 38.27           | 49.24           | 176.46           |
| 087                            | 256.88          | 246.67          | 210.18          | 170.12          | 883.85           |
| 088                            | 503.50          | 437.40          | 379.10          | 356.93          | 1,676.92         |
| 089                            | 29.89           | 21.95           | 27.12           | 30.69           | 109.64           |
| <b>NJ - NEW JERSEY - Total</b> | <b>3,737.90</b> | <b>3,369.86</b> | <b>3,023.95</b> | <b>3,023.37</b> | <b>13,155.09</b> |

**STATE: NM - NEW MEXICO**

| REGISTRANT ZIP CODE 3 | 1ST QUARTER | 2ND QUARTER | 3RD QUARTER | 4TH QUARTER | TOTAL GRAMS |
|-----------------------|-------------|-------------|-------------|-------------|-------------|
| 870                   | 68.29       | 67.84       | 51.25       | 56.83       | 244.21      |
| 871                   | 305.86      | 253.09      | 182.17      | 183.77      | 924.88      |
| 873                   | 22.61       | 17.80       | 11.78       | 9.10        | 61.29       |
| 874                   | 8.12        | 5.22        | 4.01        | 2.94        | 20.30       |
| 875                   | 50.05       | 52.90       | 60.31       | 40.14       | 203.40      |
| 877                   | 8.30        | 5.17        | 4.10        | 5.62        | 23.19       |

|                                |               |               |               |               |                 |
|--------------------------------|---------------|---------------|---------------|---------------|-----------------|
| 879                            | 0.89          | 2.68          | 2.68          | 3.57          | 9.81            |
| 880                            | 27.48         | 20.61         | 30.15         | 12.67         | 90.90           |
| 882                            | 47.64         | 35.95         | 27.12         | 20.96         | 131.67          |
| 883                            | 17.04         | 15.08         | 15.34         | 13.92         | 61.38           |
| <b>NM - NEW MEXICO - Total</b> | <b>556.27</b> | <b>476.34</b> | <b>388.91</b> | <b>349.52</b> | <b>1,771.04</b> |

**STATE: NV - NEVADA**

| REGISTRANT ZIP CODE 3      | 1ST QUARTER     | 2ND QUARTER     | 3RD QUARTER     | 4TH QUARTER     | TOTAL GRAMS     |
|----------------------------|-----------------|-----------------|-----------------|-----------------|-----------------|
| 890                        | 616.17          | 437.31          | 477.72          | 425.40          | 1,956.60        |
| 891                        | 1,147.15        | 1,007.58        | 889.74          | 776.08          | 3,820.55        |
| 894                        | 85.11           | 74.67           | 70.21           | 59.68           | 289.66          |
| 895                        | 87.47           | 72.26           | 67.00           | 57.90           | 284.62          |
| 897                        | 34.79           | 36.58           | 37.65           | 25.25           | 134.26          |
| <b>NV - NEVADA - Total</b> | <b>1,970.69</b> | <b>1,628.39</b> | <b>1,542.31</b> | <b>1,344.31</b> | <b>6,485.70</b> |

**STATE: NY - NEW YORK**

| REGISTRANT ZIP CODE 3 | 1ST QUARTER | 2ND QUARTER | 3RD QUARTER | 4TH QUARTER | TOTAL GRAMS |
|-----------------------|-------------|-------------|-------------|-------------|-------------|
| 100                   | 1,222.62    | 1,036.26    | 834.56      | 755.52      | 3,848.97    |
| 101                   | 30.51       | 25.16       | 14.27       | 19.98       | 89.92       |
| 103                   | 562.38      | 668.27      | 546.19      | 577.46      | 2,354.30    |
| 104                   | 352.29      | 277.53      | 322.32      | 324.64      | 1,276.77    |
| 105                   | 280.65      | 245.95      | 263.08      | 219.55      | 1,009.23    |
| 106                   | 39.61       | 34.08       | 31.94       | 33.54       | 139.17      |
| 107                   | 64.86       | 68.07       | 61.02       | 50.00       | 243.94      |
| 108                   | 25.42       | 12.27       | 29.44       | 30.33       | 97.46       |
| 109                   | 502.43      | 522.10      | 490.92      | 547.04      | 2,062.49    |
| 110                   | 118.83      | 131.50      | 117.85      | 113.65      | 481.82      |
| 111                   | 80.87       | 97.60       | 158.97      | 85.46       | 422.90      |
| 112                   | 1,231.41    | 1,219.05    | 1,208.35    | 1,019.76    | 4,678.57    |
| 113                   | 269.24      | 241.40      | 232.57      | 213.66      | 956.87      |
| 114                   | 127.30      | 107.50      | 109.01      | 257.73      | 601.54      |
| 115                   | 348.14      | 342.12      | 340.25      | 347.65      | 1,378.16    |
| 116                   | 61.02       | 79.40       | 79.75       | 72.44       | 292.61      |
| 117                   | 1,089.74    | 979.39      | 859.45      | 922.92      | 3,851.51    |
| 118                   | 24.00       | 11.15       | 8.03        | 9.63        | 52.81       |
| 119                   | 73.15       | 81.72       | 79.22       | 66.73       | 300.82      |
| 120                   | 118.20      | 101.79      | 104.91      | 87.60       | 412.51      |
| 121                   | 44.34       | 26.58       | 40.86       | 19.80       | 131.58      |
| 122                   | 25.78       | 18.02       | 26.32       | 24.35       | 94.47       |
| 123                   | 16.41       | 20.61       | 19.63       | 15.25       | 71.90       |
| 124                   | 227.57      | 222.53      | 185.20      | 189.62      | 824.92      |
| 125                   | 360.41      | 357.46      | 306.35      | 303.58      | 1,327.80    |

|                              |                  |                  |                 |                 |                  |
|------------------------------|------------------|------------------|-----------------|-----------------|------------------|
| 126                          | 134.89           | 150.05           | 116.51          | 180.92          | 582.36           |
| 127                          | 141.00           | 103.53           | 107.05          | 85.46           | 437.04           |
| 128                          | 122.31           | 169.23           | 143.90          | 171.86          | 607.30           |
| 129                          | 293.59           | 251.75           | 268.61          | 257.19          | 1,071.14         |
| 130                          | 321.56           | 305.32           | 293.59          | 270.57          | 1,191.04         |
| 131                          | 70.74            | 73.51            | 65.93           | 72.30           | 282.48           |
| 132                          | 77.12            | 71.46            | 64.10           | 46.97           | 259.65           |
| 133                          | 76.63            | 49.15            | 47.99           | 48.71           | 222.49           |
| 134                          | 43.09            | 42.55            | 41.30           | 24.40           | 151.34           |
| 135                          | 35.24            | 9.72             | 17.93           | 12.22           | 75.11            |
| 136                          | 147.82           | 145.50           | 118.92          | 124.27          | 536.51           |
| 137                          | 114.81           | 116.33           | 77.61           | 80.82           | 389.58           |
| 138                          | 172.93           | 149.03           | 118.02          | 126.41          | 566.39           |
| 139                          | 169.14           | 174.05           | 160.76          | 165.04          | 668.99           |
| 140                          | 572.68           | 469.16           | 456.84          | 456.18          | 1,954.86         |
| 141                          | 236.94           | 242.74           | 272.09          | 236.23          | 988.00           |
| 142                          | 590.21           | 497.48           | 450.06          | 528.44          | 2,066.19         |
| 143                          | 214.33           | 200.41           | 205.81          | 224.23          | 844.77           |
| 144                          | 86.62            | 76.63            | 83.05           | 82.52           | 328.83           |
| 145                          | 67.71            | 43.49            | 32.83           | 59.10           | 203.13           |
| 146                          | 79.75            | 73.78            | 86.18           | 72.08           | 311.79           |
| 147                          | 65.12            | 70.39            | 63.96           | 68.16           | 267.63           |
| 148                          | 237.03           | 208.39           | 163.48          | 193.18          | 802.09           |
| 149                          | 26.05            | 18.56            | 21.32           | 13.11           | 79.04            |
| <b>NY - NEW YORK - Total</b> | <b>11,394.53</b> | <b>10,639.72</b> | <b>9,948.30</b> | <b>9,908.29</b> | <b>41,890.83</b> |

**STATE: OH - OHIO**

| REGISTRANT ZIP CODE 3 | 1ST QUARTER | 2ND QUARTER | 3RD QUARTER | 4TH QUARTER | TOTAL GRAMS |
|-----------------------|-------------|-------------|-------------|-------------|-------------|
| 430                   | 261.16      | 220.17      | 173.38      | 187.34      | 842.05      |
| 431                   | 104.02      | 101.92      | 113.83      | 94.29       | 414.07      |
| 432                   | 344.58      | 318.70      | 101.57      | 122.01      | 886.85      |
| 433                   | 45.68       | 46.84       | 36.80       | 41.26       | 170.57      |
| 434                   | 190.64      | 157.54      | 148.45      | 84.57       | 581.20      |
| 435                   | 111.65      | 110.93      | 79.40       | 84.57       | 386.55      |
| 436                   | 316.70      | 255.72      | 205.63      | 176.90      | 954.95      |
| 437                   | 52.37       | 22.48       | 25.69       | 23.19       | 123.73      |
| 438                   | 30.33       | 23.37       | 29.26       | 19.09       | 102.06      |
| 439                   | 197.87      | 191.36      | 185.82      | 168.03      | 743.07      |
| 440                   | 164.99      | 137.03      | 143.00      | 107.05      | 552.08      |
| 441                   | 123.51      | 94.12       | 83.14       | 70.30       | 371.07      |
| 442                   | 168.38      | 142.33      | 137.03      | 134.22      | 581.96      |

|                          |                 |                 |                 |                 |                  |
|--------------------------|-----------------|-----------------|-----------------|-----------------|------------------|
| 443                      | 54.42           | 53.17           | 44.03           | 37.20           | 188.81           |
| 444                      | 166.20          | 133.77          | 114.59          | 115.84          | 530.40           |
| 445                      | 107.59          | 109.19          | 91.22           | 73.87           | 381.86           |
| 446                      | 196.26          | 213.66          | 150.10          | 150.76          | 710.78           |
| 447                      | 123.20          | 105.54          | 112.49          | 101.79          | 443.02           |
| 448                      | 372.63          | 360.41          | 286.19          | 166.38          | 1,185.60         |
| 449                      | 16.95           | 15.08           | 27.39           | 24.18           | 83.59            |
| 450                      | 425.93          | 370.27          | 344.22          | 349.61          | 1,490.03         |
| 451                      | 193.18          | 171.06          | 149.83          | 155.23          | 669.30           |
| 452                      | 210.31          | 189.04          | 192.02          | 158.21          | 749.59           |
| 453                      | 169.10          | 168.83          | 156.52          | 150.90          | 645.35           |
| 454                      | 153.84          | 152.10          | 144.88          | 138.99          | 589.81           |
| 455                      | 22.03           | 36.04           | 27.12           | 17.08           | 102.28           |
| 456                      | 814.53          | 805.61          | 825.37          | 807.08          | 3,252.60         |
| 457                      | 46.43           | 35.51           | 42.91           | 32.38           | 157.23           |
| 458                      | 20.07           | 30.96           | 21.59           | 23.11           | 95.72            |
| <b>OH - OHIO - Total</b> | <b>5,204.56</b> | <b>4,772.73</b> | <b>4,193.45</b> | <b>3,815.44</b> | <b>17,986.18</b> |

**STATE: OK - OKLAHOMA**

| REGISTRANT ZIP CODE 3        | 1ST QUARTER     | 2ND QUARTER     | 3RD QUARTER     | 4TH QUARTER     | TOTAL GRAMS     |
|------------------------------|-----------------|-----------------|-----------------|-----------------|-----------------|
| 730                          | 933.23          | 817.83          | 614.03          | 378.79          | 2,743.88        |
| 731                          | 624.92          | 595.92          | 417.15          | 250.99          | 1,888.98        |
| 734                          | 46.03           | 35.68           | 28.81           | 36.04           | 146.57          |
| 735                          | 85.20           | 69.94           | 69.67           | 49.15           | 273.96          |
| 736                          | 31.85           | 15.43           | 14.54           | 8.47            | 70.30           |
| 737                          | 16.24           | 18.29           | 20.34           | 11.42           | 66.28           |
| 738                          | 7.05            | 5.80            | 3.03            | 3.21            | 19.09           |
| 740                          | 323.74          | 249.48          | 177.08          | 164.68          | 914.98          |
| 741                          | 214.10          | 179.54          | 130.34          | 96.12           | 620.10          |
| 743                          | 60.13           | 61.38           | 51.74           | 59.50           | 232.75          |
| 744                          | 89.30           | 82.88           | 67.18           | 45.14           | 284.49          |
| 745                          | 148.62          | 139.26          | 97.42           | 108.75          | 494.04          |
| 746                          | 24.44           | 23.64           | 10.26           | 13.29           | 71.64           |
| 747                          | 7.14            | 7.32            | 9.37            | 6.07            | 29.89           |
| 748                          | 163.52          | 118.74          | 92.42           | 45.23           | 419.91          |
| 749                          | 44.96           | 34.17           | 24.35           | 25.51           | 129.00          |
| <b>OK - OKLAHOMA - Total</b> | <b>2,820.46</b> | <b>2,455.28</b> | <b>1,827.73</b> | <b>1,302.38</b> | <b>8,405.86</b> |

**STATE: OR - OREGON**

| REGISTRANT ZIP CODE 3 | 1ST QUARTER | 2ND QUARTER | 3RD QUARTER | 4TH QUARTER | TOTAL GRAMS |
|-----------------------|-------------|-------------|-------------|-------------|-------------|
| 970                   | 191.18      | 161.92      | 166.91      | 168.74      | 688.75      |
| 971                   | 39.43       | 31.22       | 25.42       | 19.63       | 115.71      |

|                            |                 |               |               |               |                 |
|----------------------------|-----------------|---------------|---------------|---------------|-----------------|
| 972                        | 160.09          | 174.54        | 161.20        | 141.93        | 637.76          |
| 973                        | 96.12           | 107.59        | 91.08         | 84.08         | 378.87          |
| 974                        | 339.00          | 282.04        | 263.04        | 256.03        | 1,140.10        |
| 975                        | 55.00           | 54.06         | 52.72         | 40.59         | 202.37          |
| 976                        | 9.81            | 5.80          | 7.23          | 3.03          | 25.87           |
| 977                        | 76.99           | 66.28         | 49.42         | 73.87         | 266.56          |
| 978                        | 57.90           | 57.54         | 48.44         | 46.75         | 210.62          |
| 979                        | 16.15           | 8.03          | 4.91          | 1.78          | 30.87           |
| <b>OR - OREGON - Total</b> | <b>1,041.66</b> | <b>949.02</b> | <b>870.38</b> | <b>836.43</b> | <b>3,697.49</b> |

**STATE: PA - PENNSYLVANIA**

| REGISTRANT ZIP CODE 3 | 1ST QUARTER | 2ND QUARTER | 3RD QUARTER | 4TH QUARTER | TOTAL GRAMS |
|-----------------------|-------------|-------------|-------------|-------------|-------------|
| 150                   | 918.55      | 773.58      | 706.78      | 687.81      | 3,086.72    |
| 151                   | 550.69      | 537.18      | 456.67      | 451.63      | 1,996.16    |
| 152                   | 1,412.60    | 1,319.73    | 1,166.69    | 1,108.92    | 5,007.94    |
| 153                   | 373.39      | 344.40      | 370.53      | 300.50      | 1,388.82    |
| 154                   | 858.42      | 865.83      | 821.00      | 801.06      | 3,346.31    |
| 155                   | 256.43      | 167.05      | 143.14      | 88.23       | 654.85      |
| 156                   | 937.95      | 873.63      | 862.62      | 895.09      | 3,569.29    |
| 157                   | 306.70      | 187.61      | 195.55      | 162.45      | 852.31      |
| 158                   | 316.70      | 316.25      | 225.61      | 216.11      | 1,074.67    |
| 159                   | 748.65      | 595.03      | 526.16      | 499.31      | 2,369.15    |
| 160                   | 405.68      | 374.24      | 349.84      | 338.64      | 1,468.40    |
| 161                   | 1,051.43    | 854.27      | 699.58      | 638.57      | 3,243.85    |
| 162                   | 333.42      | 258.26      | 224.36      | 215.98      | 1,032.03    |
| 163                   | 452.52      | 433.78      | 367.81      | 382.26      | 1,636.38    |
| 164                   | 97.37       | 76.19       | 82.65       | 70.48       | 326.69      |
| 165                   | 157.68      | 141.58      | 135.06      | 104.29      | 538.61      |
| 166                   | 432.67      | 351.18      | 286.59      | 278.25      | 1,348.68    |
| 167                   | 166.29      | 146.93      | 121.59      | 79.93       | 514.74      |
| 168                   | 55.22       | 29.62       | 29.57       | 22.70       | 137.12      |
| 169                   | 16.59       | 19.27       | 6.69        | 8.03        | 50.58       |
| 170                   | 535.48      | 457.60      | 367.05      | 345.51      | 1,705.65    |
| 171                   | 172.53      | 89.66       | 90.10       | 100.90      | 453.19      |
| 172                   | 284.13      | 299.83      | 250.59      | 259.82      | 1,094.38    |
| 173                   | 345.91      | 276.55      | 176.10      | 206.61      | 1,005.17    |
| 174                   | 209.20      | 191.13      | 145.28      | 123.56      | 669.16      |
| 175                   | 173.51      | 131.58      | 129.76      | 129.27      | 564.12      |
| 176                   | 87.07       | 97.55       | 102.41      | 82.61       | 369.64      |
| 177                   | 42.20       | 20.96       | 38.36       | 25.78       | 127.30      |
| 178                   | 19.63       | 18.91       | 12.58       | 13.65       | 64.77       |



|                                  |                  |                  |                  |                  |                  |
|----------------------------------|------------------|------------------|------------------|------------------|------------------|
| 179                              | 17.40            | 19.36            | 9.46             | 14.10            | 60.31            |
| 180                              | 85.20            | 81.63            | 54.91            | 69.00            | 290.74           |
| 181                              | 61.11            | 53.57            | 54.46            | 41.75            | 210.89           |
| 182                              | 28.64            | 11.60            | 49.07            | 34.70            | 124.00           |
| 183                              | 29.80            | 26.50            | 21.68            | 11.78            | 89.75            |
| 184                              | 46.66            | 58.16            | 50.40            | 54.51            | 209.73           |
| 185                              | 43.53            | 53.70            | 46.39            | 23.46            | 167.09           |
| 186                              | 67.53            | 48.98            | 37.74            | 47.10            | 201.35           |
| 187                              | 561.67           | 572.15           | 512.42           | 526.87           | 2,173.11         |
| 188                              | 27.66            | 20.52            | 24.98            | 21.41            | 94.56            |
| 189                              | 107.01           | 142.25           | 135.06           | 133.59           | 517.91           |
| 190                              | 876.58           | 724.30           | 702.71           | 689.46           | 2,993.04         |
| 191                              | 259.87           | 249.52           | 194.03           | 191.44           | 894.87           |
| 193                              | 209.38           | 203.49           | 214.06           | 205.90           | 832.82           |
| 194                              | 174.00           | 153.53           | 149.07           | 120.52           | 597.13           |
| 195                              | 40.90            | 23.73            | 36.40            | 31.13            | 132.16           |
| 196                              | 84.21            | 82.88            | 83.05            | 72.97            | 323.12           |
| <b>PA - PENNSYLVANIA - Total</b> | <b>14,439.75</b> | <b>12,775.23</b> | <b>11,466.62</b> | <b>10,927.65</b> | <b>49,609.24</b> |

**STATE: RI - RHODE ISLAND**

| REGISTRANT ZIP CODE 3            | 1ST QUARTER   | 2ND QUARTER   | 3RD QUARTER   | 4TH QUARTER   | TOTAL GRAMS   |
|----------------------------------|---------------|---------------|---------------|---------------|---------------|
| 028                              | 116.87        | 86.62         | 101.43        | 83.59         | 388.51        |
| 029                              | 114.19        | 81.09         | 57.81         | 39.70         | 292.79        |
| <b>RI - RHODE ISLAND - Total</b> | <b>231.05</b> | <b>167.71</b> | <b>159.24</b> | <b>123.29</b> | <b>681.30</b> |

**STATE: SC - SOUTH CAROLINA**

| REGISTRANT ZIP CODE 3              | 1ST QUARTER     | 2ND QUARTER     | 3RD QUARTER     | 4TH QUARTER     | TOTAL GRAMS      |
|------------------------------------|-----------------|-----------------|-----------------|-----------------|------------------|
| 290                                | 381.11          | 395.56          | 353.18          | 375.48          | 1,505.33         |
| 291                                | 363.62          | 378.25          | 362.91          | 320.35          | 1,425.13         |
| 292                                | 719.84          | 643.29          | 635.09          | 603.19          | 2,601.41         |
| 293                                | 56.38           | 44.43           | 35.15           | 38.45           | 174.41           |
| 294                                | 655.29          | 581.29          | 606.32          | 604.89          | 2,447.79         |
| 295                                | 447.03          | 371.38          | 301.53          | 323.30          | 1,443.24         |
| 296                                | 389.31          | 339.58          | 360.19          | 319.15          | 1,408.22         |
| 297                                | 147.95          | 193.45          | 165.75          | 157.28          | 664.44           |
| 298                                | 67.18           | 54.73           | 58.43           | 47.15           | 227.49           |
| 299                                | 149.16          | 130.92          | 138.99          | 118.38          | 537.45           |
| <b>SC - SOUTH CAROLINA - Total</b> | <b>3,376.87</b> | <b>3,132.88</b> | <b>3,017.53</b> | <b>2,907.62</b> | <b>12,434.89</b> |

**STATE: SD - SOUTH DAKOTA**

| REGISTRANT ZIP CODE 3 | 1ST QUARTER | 2ND QUARTER | 3RD QUARTER | 4TH QUARTER | TOTAL GRAMS |
|-----------------------|-------------|-------------|-------------|-------------|-------------|
| 570                   | 42.02       | 29.08       | 29.26       | 35.42       | 135.78      |
| 571                   | 85.11       | 80.02       | 62.22       | 80.11       | 307.46      |

|                                  |               |               |               |               |                 |
|----------------------------------|---------------|---------------|---------------|---------------|-----------------|
| 572                              | 3.57          | 0.89          | 0.89          | 0             | 5.35            |
| 573                              | 0             | 1.34          | 1.34          | 0.45          | 3.12            |
| 574                              | 7.85          | 8.74          | 7.85          | 7.32          | 31.76           |
| 575                              | 6.60          | 4.46          | 9.46          | 9.99          | 30.51           |
| 576                              | 2.68          | 5.35          | 2.68          | 4.46          | 15.17           |
| 577                              | 187.07        | 158.26        | 124.98        | 154.60        | 624.92          |
| <b>SD - SOUTH DAKOTA - Total</b> | <b>334.89</b> | <b>288.15</b> | <b>238.68</b> | <b>292.34</b> | <b>1,154.07</b> |

**STATE: TN - TENNESSEE**

| REGISTRANT ZIP CODE 3         | 1ST QUARTER      | 2ND QUARTER      | 3RD QUARTER      | 4TH QUARTER      | TOTAL GRAMS      |
|-------------------------------|------------------|------------------|------------------|------------------|------------------|
| 370                           | 1,949.37         | 1,841.61         | 1,685.27         | 1,530.89         | 7,007.13         |
| 371                           | 1,040.28         | 979.88           | 978.01           | 923.64           | 3,921.81         |
| 372                           | 762.43           | 729.16           | 671.35           | 697.27           | 2,860.21         |
| 373                           | 797.27           | 678.26           | 592.13           | 656.81           | 2,724.47         |
| 374                           | 458.36           | 423.61           | 367.81           | 407.96           | 1,657.74         |
| 376                           | 662.25           | 570.81           | 581.02           | 535.53           | 2,349.61         |
| 377                           | 3,235.96         | 2,672.69         | 2,327.31         | 2,328.65         | 10,564.61        |
| 378                           | 2,977.34         | 2,760.92         | 2,435.97         | 2,338.19         | 10,512.42        |
| 379                           | 1,006.47         | 969.09           | 956.42           | 891.07           | 3,823.05         |
| 380                           | 79.04            | 71.55            | 51.30            | 53.17            | 255.05           |
| 381                           | 119.81           | 67.53            | 74.80            | 61.47            | 323.61           |
| 382                           | 102.06           | 108.21           | 82.07            | 86.36            | 378.70           |
| 383                           | 189.88           | 237.39           | 179.76           | 138.36           | 745.39           |
| 384                           | 146.93           | 121.41           | 137.56           | 133.37           | 539.27           |
| 385                           | 640.53           | 573.09           | 511.98           | 476.16           | 2,201.75         |
| <b>TN - TENNESSEE - Total</b> | <b>14,167.98</b> | <b>12,805.20</b> | <b>11,632.76</b> | <b>11,258.88</b> | <b>49,864.82</b> |

**STATE: TX - TEXAS**

| REGISTRANT ZIP CODE 3 | 1ST QUARTER | 2ND QUARTER | 3RD QUARTER | 4TH QUARTER | TOTAL GRAMS |
|-----------------------|-------------|-------------|-------------|-------------|-------------|
| 750                   | 786.92      | 670.99      | 599.27      | 515.54      | 2,572.73    |
| 751                   | 113.16      | 103.93      | 57.09       | 100.58      | 374.77      |
| 752                   | 139.76      | 106.34      | 78.61       | 88.41       | 413.12      |
| 754                   | 56.20       | 43.04       | 27.48       | 35.51       | 162.23      |
| 755                   | 1.78        | 0           | 0           | 0.54        | 2.32        |
| 756                   | 9.10        | 0.89        | 0           | 1.78        | 11.78       |
| 757                   | 25.34       | 30.24       | 21.68       | 31.40       | 108.66      |
| 758                   | 16.59       | 13.02       | 18.56       | 14.54       | 62.71       |
| 759                   | 36.84       | 24.09       | 33.36       | 26.85       | 121.15      |
| 760                   | 346.54      | 306.57      | 252.33      | 245.73      | 1,151.17    |
| 761                   | 246.71      | 164.95      | 124.36      | 111.29      | 647.31      |
| 762                   | 89.30       | 107.59      | 106.25      | 88.32       | 391.45      |
| 763                   | 136.80      | 124.09      | 132.79      | 110.89      | 504.57      |

|                           |                 |                 |                 |                 |                  |
|---------------------------|-----------------|-----------------|-----------------|-----------------|------------------|
| 764                       | 15.70           | 21.77           | 17.75           | 14.81           | 70.03            |
| 765                       | 50.23           | 51.12           | 24.80           | 24.18           | 150.32           |
| 766                       | 0               | 0               | 0               | 5.35            | 5.35             |
| 767                       | 22.48           | 10.35           | 10.97           | 9.77            | 53.57            |
| 768                       | 8.30            | 14.90           | 16.77           | 6.24            | 46.21            |
| 769                       | 30.96           | 21.59           | 16.55           | 10.84           | 79.93            |
| 770                       | 300.46          | 305.46          | 272.48          | 244.17          | 1,122.56         |
| 773                       | 197.15          | 183.33          | 135.87          | 152.64          | 668.99           |
| 774                       | 258.89          | 233.28          | 234.62          | 210.62          | 937.42           |
| 775                       | 354.61          | 332.93          | 297.69          | 291.67          | 1,276.91         |
| 776                       | 119.63          | 125.03          | 115.79          | 90.19           | 450.64           |
| 777                       | 87.11           | 39.39           | 40.90           | 33.19           | 200.59           |
| 778                       | 26.36           | 28.01           | 18.11           | 16.06           | 88.54            |
| 779                       | 31.31           | 35.55           | 26.81           | 26.67           | 120.34           |
| 780                       | 66.46           | 53.79           | 66.02           | 63.25           | 249.52           |
| 781                       | 77.79           | 81.00           | 66.82           | 73.51           | 299.12           |
| 782                       | 640.84          | 522.06          | 572.82          | 459.07          | 2,194.79         |
| 783                       | 6.78            | 8.92            | 3.57            | 10.26           | 29.53            |
| 784                       | 75.20           | 36.93           | 52.72           | 40.59           | 205.45           |
| 785                       | 0               | 1.78            | 0.89            | 4.28            | 6.96             |
| 786                       | 480.57          | 427.81          | 319.46          | 227.49          | 1,455.33         |
| 787                       | 394.26          | 313.17          | 265.36          | 186.81          | 1,159.60         |
| 788                       | 23.73           | 7.58            | 6.78            | 7.14            | 45.23            |
| 789                       | 15.34           | 16.95           | 8.92            | 10.71           | 51.92            |
| 790                       | 9.72            | 9.86            | 8.79            | 13.11           | 41.48            |
| 791                       | 75.38           | 76.14           | 62.94           | 67.44           | 281.90           |
| 793                       | 4.01            | 0               | 0               | 0               | 4.01             |
| 794                       | 29.48           | 17.93           | 5.80            | 6.69            | 59.90            |
| 795                       | 0.80            | 0.89            | 1.43            | 1.69            | 4.82             |
| 796                       | 19.80           | 7.67            | 12.76           | 12.40           | 52.63            |
| 797                       | 20.70           | 13.92           | 4.64            | 4.46            | 43.71            |
| 799                       | 86.80           | 71.37           | 60.57           | 37.56           | 256.30           |
| <b>TX - TEXAS - Total</b> | <b>5,535.93</b> | <b>4,766.22</b> | <b>4,201.18</b> | <b>3,734.24</b> | <b>18,237.57</b> |

**STATE: UT - UTAH**

| REGISTRANT ZIP CODE 3 | 1ST QUARTER | 2ND QUARTER | 3RD QUARTER | 4TH QUARTER | TOTAL GRAMS |
|-----------------------|-------------|-------------|-------------|-------------|-------------|
| 840                   | 1,571.05    | 1,324.68    | 1,301.66    | 1,252.37    | 5,449.77    |
| 841                   | 413.00      | 427.90      | 343.19      | 360.72      | 1,544.80    |
| 843                   | 67.18       | 76.10       | 85.91       | 76.01       | 305.19      |
| 844                   | 366.79      | 362.15      | 309.47      | 329.45      | 1,367.86    |
| 845                   | 67.98       | 59.77       | 61.11       | 43.36       | 232.21      |

|                          |                 |                 |                 |                 |                  |
|--------------------------|-----------------|-----------------|-----------------|-----------------|------------------|
| 846                      | 262.95          | 230.12          | 218.70          | 225.79          | 937.55           |
| 847                      | 234.76          | 196.35          | 182.43          | 229.27          | 842.81           |
| <b>UT - UTAH - Total</b> | <b>2,983.69</b> | <b>2,677.06</b> | <b>2,502.47</b> | <b>2,516.97</b> | <b>10,680.19</b> |

**STATE: VA - VIRGINIA**

| REGISTRANT ZIP CODE 3        | 1ST QUARTER     | 2ND QUARTER     | 3RD QUARTER     | 4TH QUARTER     | TOTAL GRAMS      |
|------------------------------|-----------------|-----------------|-----------------|-----------------|------------------|
| 201                          | 643.74          | 717.83          | 636.07          | 709.93          | 2,707.57         |
| 220                          | 414.29          | 361.35          | 302.96          | 322.49          | 1,401.09         |
| 221                          | 501.14          | 412.19          | 450.33          | 374.95          | 1,738.61         |
| 222                          | 126.77          | 136.31          | 152.50          | 129.76          | 545.34           |
| 223                          | 135.78          | 100.67          | 81.89           | 101.43          | 419.78           |
| 224                          | 740.98          | 805.57          | 676.17          | 660.73          | 2,883.45         |
| 225                          | 117.49          | 102.86          | 91.80           | 68.25           | 380.39           |
| 226                          | 351.89          | 282.53          | 269.73          | 224.50          | 1,128.64         |
| 227                          | 34.79           | 57.09           | 51.65           | 40.77           | 184.31           |
| 228                          | 24.27           | 25.34           | 33.63           | 25.78           | 109.01           |
| 229                          | 94.74           | 81.81           | 76.54           | 90.01           | 343.10           |
| 230                          | 165.57          | 78.95           | 98.40           | 72.88           | 415.81           |
| 231                          | 171.82          | 132.43          | 139.08          | 161.60          | 604.93           |
| 232                          | 190.73          | 159.51          | 158.66          | 140.86          | 649.76           |
| 233                          | 206.70          | 235.29          | 229.09          | 228.82          | 899.91           |
| 234                          | 470.40          | 435.70          | 350.46          | 305.68          | 1,562.25         |
| 235                          | 166.91          | 177.22          | 132.48          | 136.67          | 613.27           |
| 236                          | 140.91          | 121.82          | 128.86          | 115.30          | 506.89           |
| 237                          | 96.79           | 96.44           | 69.54           | 100.45          | 363.22           |
| 238                          | 251.13          | 176.81          | 179.31          | 172.00          | 779.25           |
| 239                          | 54.24           | 38.45           | 32.47           | 24.00           | 149.16           |
| 240                          | 227.40          | 179.94          | 185.02          | 148.80          | 741.16           |
| 241                          | 147.20          | 114.86          | 123.91          | 113.74          | 499.71           |
| 242                          | 289.17          | 267.32          | 248.67          | 274.59          | 1,079.75         |
| 243                          | 84.57           | 83.50           | 101.70          | 80.47           | 350.24           |
| 244                          | 27.57           | 18.20           | 20.61           | 22.75           | 89.12            |
| 245                          | 203.13          | 206.25          | 146.04          | 129.31          | 684.73           |
| 246                          | 68.78           | 79.75           | 78.42           | 51.65           | 278.60           |
| <b>VA - VIRGINIA - Total</b> | <b>6,148.89</b> | <b>5,685.98</b> | <b>5,245.99</b> | <b>5,028.19</b> | <b>22,109.05</b> |

**STATE: VT - VERMONT**

| REGISTRANT ZIP CODE 3 | 1ST QUARTER | 2ND QUARTER | 3RD QUARTER | 4TH QUARTER | TOTAL GRAMS |
|-----------------------|-------------|-------------|-------------|-------------|-------------|
| 050                   | 2.68        | 3.57        | 1.78        | 4.46        | 12.49       |
| 052                   | 32.12       | 17.84       | 18.73       | 23.19       | 91.89       |
| 054                   | 107.68      | 79.40       | 72.71       | 82.61       | 342.39      |
| 056                   | 14.99       | 12.85       | 12.85       | 14.99       | 55.67       |

|                             |               |               |               |               |               |
|-----------------------------|---------------|---------------|---------------|---------------|---------------|
| 057                         | 7.49          | 12.67         | 11.06         | 10.97         | 42.20         |
| 058                         | 4.46          | 1.34          | 3.12          | 3.66          | 12.58         |
| <b>VT - VERMONT - Total</b> | <b>169.41</b> | <b>127.66</b> | <b>120.26</b> | <b>139.88</b> | <b>557.21</b> |

**STATE: WA - WASHINGTON**

| REGISTRANT ZIP CODE 3          | 1ST QUARTER     | 2ND QUARTER     | 3RD QUARTER     | 4TH QUARTER     | TOTAL GRAMS     |
|--------------------------------|-----------------|-----------------|-----------------|-----------------|-----------------|
| 980                            | 395.29          | 328.11          | 326.06          | 283.06          | 1,332.53        |
| 981                            | 102.50          | 77.61           | 87.07           | 104.46          | 371.65          |
| 982                            | 255.90          | 219.90          | 221.20          | 252.11          | 949.11          |
| 983                            | 96.26           | 104.42          | 86.40           | 94.12           | 381.19          |
| 984                            | 76.27           | 56.69           | 58.16           | 62.98           | 254.11          |
| 985                            | 148.67          | 120.75          | 118.96          | 74.67           | 463.04          |
| 986                            | 238.82          | 210.62          | 186.98          | 222.94          | 859.36          |
| 988                            | 23.28           | 23.91           | 19.49           | 18.07           | 84.75           |
| 989                            | 44.87           | 39.97           | 41.57           | 52.54           | 178.96          |
| 990                            | 14.72           | 7.23            | 7.94            | 4.64            | 34.52           |
| 992                            | 136.98          | 106.74          | 115.66          | 107.99          | 467.37          |
| 993                            | 90.01           | 79.75           | 66.37           | 68.87           | 305.01          |
| 994                            | 13.74           | 12.13           | 9.72            | 7.49            | 43.09           |
| <b>WA - WASHINGTON - Total</b> | <b>1,637.32</b> | <b>1,387.84</b> | <b>1,345.60</b> | <b>1,353.94</b> | <b>5,724.69</b> |

**STATE: WI - WISCONSIN**

| REGISTRANT ZIP CODE 3         | 1ST QUARTER     | 2ND QUARTER   | 3RD QUARTER   | 4TH QUARTER   | TOTAL GRAMS     |
|-------------------------------|-----------------|---------------|---------------|---------------|-----------------|
| 530                           | 115.26          | 107.77        | 108.84        | 113.34        | 445.20          |
| 531                           | 250.81          | 178.06        | 152.46        | 139.08        | 720.42          |
| 532                           | 129.22          | 102.90        | 89.25         | 79.40         | 400.78          |
| 534                           | 77.52           | 62.63         | 62.36         | 58.61         | 261.12          |
| 535                           | 43.98           | 44.52         | 25.87         | 33.63         | 148.00          |
| 537                           | 16.50           | 5.89          | 6.69          | 5.89          | 34.97           |
| 538                           | 2.14            | 1.74          | 0.40          | 0             | 4.28            |
| 539                           | 20.43           | 25.42         | 14.63         | 15.34         | 75.83           |
| 540                           | 16.06           | 11.06         | 9.63          | 6.96          | 43.71           |
| 541                           | 23.91           | 19.45         | 20.65         | 20.61         | 84.62           |
| 542                           | 15.61           | 16.86         | 14.81         | 11.95         | 59.24           |
| 543                           | 32.20           | 23.69         | 21.81         | 22.79         | 100.50          |
| 544                           | 90.73           | 74.80         | 76.94         | 64.41         | 306.88          |
| 545                           | 11.24           | 14.27         | 10.35         | 7.94          | 43.80           |
| 546                           | 7.14            | 4.01          | 0             | 0             | 11.15           |
| 547                           | 0.27            | 0             | 0             | 0             | 0.27            |
| 548                           | 18.82           | 22.03         | 17.04         | 18.82         | 76.72           |
| 549                           | 159.33          | 113.21        | 141.09        | 109.19        | 522.82          |
| <b>WI - WISCONSIN - Total</b> | <b>1,031.18</b> | <b>828.31</b> | <b>772.83</b> | <b>707.97</b> | <b>3,340.29</b> |

**STATE: WV - WEST VIRGINIA**

| REGISTRANT ZIP CODE 3             | 1ST QUARTER     | 2ND QUARTER     | 3RD QUARTER     | 4TH QUARTER     | TOTAL GRAMS     |
|-----------------------------------|-----------------|-----------------|-----------------|-----------------|-----------------|
| 247                               | 74.27           | 54.37           | 35.46           | 33.41           | 197.51          |
| 248                               | 79.62           | 70.48           | 61.55           | 64.86           | 276.51          |
| 249                               | 38.90           | 39.25           | 44.16           | 29.44           | 151.75          |
| 250                               | 15.08           | 14.72           | 10.44           | 9.10            | 49.33           |
| 251                               | 19.89           | 15.43           | 15.08           | 9.81            | 60.22           |
| 252                               | 4.28            | 0.89            | 0               | 1.78            | 6.96            |
| 253                               | 102.41          | 110.35          | 99.11           | 70.12           | 382.00          |
| 254                               | 623.27          | 611.89          | 488.34          | 469.20          | 2,192.69        |
| 255                               | 123.96          | 86.94           | 101.57          | 124.31          | 436.77          |
| 256                               | 35.86           | 32.74           | 18.11           | 14.81           | 101.52          |
| 257                               | 46.52           | 50.23           | 36.13           | 52.37           | 185.24          |
| 258                               | 8.21            | 10.35           | 11.51           | 10.71           | 40.77           |
| 259                               | 14.90           | 13.02           | 14.10           | 15.70           | 57.72           |
| 260                               | 144.07          | 127.04          | 115.04          | 139.57          | 525.71          |
| 261                               | 18.20           | 17.13           | 20.74           | 21.41           | 77.48           |
| 262                               | 18.02           | 4.28            | 2.68            | 4.19            | 29.17           |
| 263                               | 22.30           | 22.75           | 8.92            | 7.05            | 61.02           |
| 264                               | 5.35            | 3.57            | 3.75            | 5.17            | 17.84           |
| 265                               | 31.49           | 26.50           | 28.01           | 29.17           | 115.17          |
| 266                               | 2.41            | 5.35            | 0.98            | 1.96            | 10.71           |
| 267                               | 48.89           | 59.24           | 25.87           | 49.51           | 183.50          |
| 268                               | 2.23            | 0               | 0               | 0               | 2.23            |
| <b>WV - WEST VIRGINIA - Total</b> | <b>1,480.13</b> | <b>1,376.51</b> | <b>1,141.53</b> | <b>1,163.66</b> | <b>5,161.82</b> |

**STATE: WY - WYOMING**

| REGISTRANT ZIP CODE 3       | 1ST QUARTER   | 2ND QUARTER   | 3RD QUARTER   | 4TH QUARTER   | TOTAL GRAMS   |
|-----------------------------|---------------|---------------|---------------|---------------|---------------|
| 820                         | 32.29         | 15.25         | 18.64         | 18.29         | 84.48         |
| 822                         | 0             | 0             | 0.45          | 0             | 0.45          |
| 823                         | 3.57          | 1.34          | 0             | 0             | 4.91          |
| 824                         | 5.71          | 10.53         | 6.07          | 3.21          | 25.51         |
| 825                         | 50.98         | 21.77         | 23.69         | 24.27         | 120.70        |
| 826                         | 36.49         | 25.83         | 24.80         | 28.06         | 115.17        |
| 827                         | 21.23         | 17.40         | 13.65         | 13.74         | 66.02         |
| 828                         | 13.92         | 7.32          | 6.42          | 8.56          | 36.22         |
| 829                         | 11.78         | 12.31         | 8.03          | 9.63          | 41.75         |
| 830                         | 0             | 3.57          | 10.71         | 4.46          | 18.73         |
| 831                         | 18.82         | 9.90          | 3.21          | 2.41          | 34.35         |
| <b>WY - WYOMING - Total</b> | <b>194.79</b> | <b>125.21</b> | <b>115.66</b> | <b>112.63</b> | <b>548.28</b> |

**DRUG: 9780 - TAPENTADOL**

**STATE: AK - ALASKA**

| REGISTRANT ZIP CODE 3      | 1ST QUARTER     | 2ND QUARTER     | 3RD QUARTER     | 4TH QUARTER     | TOTAL GRAMS     |
|----------------------------|-----------------|-----------------|-----------------|-----------------|-----------------|
| 995                        | 1,148.00        | 1,249.50        | 1,205.00        | 946.50          | 4,549.00        |
| 996                        | 858.00          | 755.00          | 804.00          | 583.50          | 3,000.50        |
| 997                        | 95.00           | 138.00          | 99.00           | 82.00           | 414.00          |
| 998                        | 3.00            | 5.00            | 0               | 25.00           | 33.00           |
| 999                        | 0               | 0               | 5.00            | 9.00            | 14.00           |
| <b>AK - ALASKA - Total</b> | <b>2,104.00</b> | <b>2,147.50</b> | <b>2,113.00</b> | <b>1,646.00</b> | <b>8,010.50</b> |

**STATE: AL - ALABAMA**

| REGISTRANT ZIP CODE 3       | 1ST QUARTER      | 2ND QUARTER      | 3RD QUARTER      | 4TH QUARTER      | TOTAL GRAMS       |
|-----------------------------|------------------|------------------|------------------|------------------|-------------------|
| 350                         | 6,487.00         | 6,998.00         | 6,104.00         | 5,023.50         | 24,612.50         |
| 351                         | 3,494.00         | 3,811.00         | 3,131.00         | 2,715.50         | 13,151.50         |
| 352                         | 3,444.50         | 3,488.00         | 3,522.00         | 3,096.00         | 13,550.50         |
| 354                         | 2,851.50         | 2,764.00         | 2,620.50         | 2,635.00         | 10,871.00         |
| 355                         | 1,943.50         | 1,921.50         | 1,734.00         | 1,671.00         | 7,270.00          |
| 356                         | 3,424.00         | 3,386.00         | 2,948.00         | 2,566.00         | 12,324.00         |
| 357                         | 1,457.00         | 1,670.00         | 1,396.50         | 1,174.50         | 5,698.00          |
| 358                         | 2,220.50         | 2,121.50         | 1,871.00         | 1,989.00         | 8,202.00          |
| 359                         | 1,915.50         | 1,836.50         | 1,584.50         | 1,800.00         | 7,136.50          |
| 360                         | 3,426.00         | 3,220.50         | 3,221.50         | 2,946.50         | 12,814.50         |
| 361                         | 2,221.00         | 2,085.00         | 2,165.50         | 1,998.50         | 8,470.00          |
| 362                         | 1,331.50         | 1,087.00         | 1,088.50         | 1,279.50         | 4,786.50          |
| 363                         | 1,091.00         | 1,117.00         | 1,049.50         | 889.50           | 4,147.00          |
| 364                         | 271.00           | 309.00           | 304.00           | 291.00           | 1,175.00          |
| 365                         | 2,759.50         | 2,963.00         | 2,710.00         | 2,511.50         | 10,944.00         |
| 366                         | 2,392.50         | 2,142.00         | 2,066.00         | 1,757.00         | 8,357.50          |
| 367                         | 390.50           | 383.00           | 484.50           | 600.50           | 1,858.50          |
| 368                         | 2,006.00         | 1,816.00         | 2,149.00         | 1,986.50         | 7,957.50          |
| 369                         | 219.00           | 253.00           | 287.50           | 218.00           | 977.50            |
| <b>AL - ALABAMA - Total</b> | <b>43,345.50</b> | <b>43,372.00</b> | <b>40,437.50</b> | <b>37,149.00</b> | <b>164,304.00</b> |

**STATE: AR - ARKANSAS**

| REGISTRANT ZIP CODE 3 | 1ST QUARTER | 2ND QUARTER | 3RD QUARTER | 4TH QUARTER | TOTAL GRAMS |
|-----------------------|-------------|-------------|-------------|-------------|-------------|
| 716                   | 432.00      | 432.00      | 347.00      | 271.50      | 1,482.50    |
| 717                   | 699.00      | 789.50      | 650.00      | 656.00      | 2,794.50    |
| 718                   | 170.00      | 80.00       | 127.00      | 166.50      | 543.50      |
| 719                   | 886.50      | 778.00      | 633.00      | 540.50      | 2,838.00    |
| 720                   | 2,919.00    | 2,479.00    | 2,480.00    | 2,010.50    | 9,888.50    |
| 721                   | 2,071.50    | 2,085.50    | 1,826.00    | 1,517.00    | 7,500.00    |
| 722                   | 1,150.50    | 1,159.50    | 991.00      | 997.50      | 4,298.50    |
| 723                   | 205.00      | 219.00      | 173.00      | 167.00      | 764.00      |

|                              |                  |                  |                  |                  |                  |
|------------------------------|------------------|------------------|------------------|------------------|------------------|
| 724                          | 1,269.50         | 1,016.00         | 951.00           | 809.50           | 4,046.00         |
| 725                          | 767.00           | 667.50           | 491.50           | 376.00           | 2,302.00         |
| 726                          | 855.50           | 749.00           | 706.50           | 564.50           | 2,875.50         |
| 727                          | 2,668.50         | 2,763.50         | 2,499.50         | 2,339.00         | 10,270.50        |
| 728                          | 368.00           | 372.50           | 424.50           | 479.50           | 1,644.50         |
| 729                          | 1,119.50         | 782.00           | 803.00           | 804.50           | 3,509.00         |
| <b>AR - ARKANSAS - Total</b> | <b>15,581.50</b> | <b>14,373.00</b> | <b>13,103.00</b> | <b>11,699.50</b> | <b>54,757.00</b> |

**STATE: AZ - ARIZONA**

| REGISTRANT ZIP CODE 3       | 1ST QUARTER      | 2ND QUARTER      | 3RD QUARTER      | 4TH QUARTER      | TOTAL GRAMS       |
|-----------------------------|------------------|------------------|------------------|------------------|-------------------|
| 850                         | 7,083.50         | 6,717.00         | 5,377.50         | 4,723.00         | 23,901.00         |
| 851                         | 881.50           | 717.00           | 764.50           | 728.50           | 3,091.50          |
| 852                         | 12,336.50        | 12,096.50        | 12,014.00        | 10,026.50        | 46,473.50         |
| 853                         | 5,280.50         | 5,101.50         | 4,523.00         | 4,655.00         | 19,560.00         |
| 855                         | 270.00           | 292.50           | 211.50           | 363.50           | 1,137.50          |
| 856                         | 873.00           | 989.00           | 867.50           | 973.50           | 3,703.00          |
| 857                         | 3,754.00         | 3,946.00         | 3,928.50         | 3,639.00         | 15,267.50         |
| 859                         | 46.00            | 73.00            | 161.50           | 221.00           | 501.50            |
| 860                         | 253.50           | 250.00           | 130.50           | 144.50           | 778.50            |
| 863                         | 550.00           | 534.50           | 401.50           | 457.50           | 1,943.50          |
| 864                         | 325.00           | 234.00           | 184.00           | 164.00           | 907.00            |
| <b>AZ - ARIZONA - Total</b> | <b>31,653.50</b> | <b>30,951.00</b> | <b>28,564.00</b> | <b>26,096.00</b> | <b>117,264.50</b> |

**STATE: CA - CALIFORNIA**

| REGISTRANT ZIP CODE 3 | 1ST QUARTER | 2ND QUARTER | 3RD QUARTER | 4TH QUARTER | TOTAL GRAMS |
|-----------------------|-------------|-------------|-------------|-------------|-------------|
| 900                   | 1,857.00    | 1,571.50    | 1,666.00    | 1,867.50    | 6,962.00    |
| 902                   | 2,289.00    | 2,037.50    | 1,937.00    | 1,800.50    | 8,064.00    |
| 903                   | 65.50       | 80.00       | 32.50       | 45.00       | 223.00      |
| 904                   | 1,398.50    | 1,346.00    | 1,220.50    | 1,248.00    | 5,213.00    |
| 905                   | 308.50      | 472.50      | 395.00      | 409.00      | 1,585.00    |
| 906                   | 780.00      | 818.00      | 648.50      | 725.50      | 2,972.00    |
| 907                   | 1,207.50    | 1,237.00    | 1,136.50    | 974.50      | 4,555.50    |
| 908                   | 598.00      | 684.50      | 570.50      | 602.00      | 2,455.00    |
| 910                   | 521.00      | 387.00      | 292.50      | 356.50      | 1,557.00    |
| 911                   | 507.00      | 555.50      | 523.50      | 545.50      | 2,131.50    |
| 912                   | 178.00      | 282.50      | 176.50      | 195.50      | 832.50      |
| 913                   | 4,356.00    | 4,170.50    | 4,178.00    | 3,958.50    | 16,663.00   |
| 914                   | 1,086.00    | 1,055.00    | 1,017.50    | 920.00      | 4,078.50    |
| 915                   | 137.00      | 147.00      | 153.00      | 167.50      | 604.50      |
| 916                   | 98.00       | 58.00       | 103.00      | 137.00      | 396.00      |
| 917                   | 5,751.00    | 5,029.50    | 4,693.50    | 4,838.50    | 20,312.50   |
| 918                   | 15.00       | 53.00       | 65.00       | 35.00       | 168.00      |



|     |          |          |          |          |           |
|-----|----------|----------|----------|----------|-----------|
| 919 | 1,351.50 | 1,412.50 | 1,354.50 | 1,186.00 | 5,304.50  |
| 920 | 7,205.00 | 7,402.50 | 6,756.00 | 6,728.00 | 28,091.50 |
| 921 | 2,850.50 | 2,449.50 | 2,526.50 | 2,282.00 | 10,108.50 |
| 922 | 1,695.00 | 1,750.00 | 1,680.50 | 1,538.50 | 6,664.00  |
| 923 | 3,031.50 | 2,709.00 | 2,641.00 | 2,691.50 | 11,073.00 |
| 924 | 830.50   | 671.00   | 399.00   | 266.00   | 2,166.50  |
| 925 | 5,114.50 | 4,934.50 | 5,085.50 | 4,980.00 | 20,114.50 |
| 926 | 5,119.40 | 5,391.43 | 5,222.95 | 5,146.45 | 20,880.23 |
| 927 | 925.00   | 995.00   | 918.00   | 959.00   | 3,797.00  |
| 928 | 3,352.50 | 3,358.50 | 2,923.50 | 3,084.00 | 12,718.50 |
| 930 | 2,521.50 | 2,594.00 | 2,288.50 | 2,228.00 | 9,632.00  |
| 931 | 371.50   | 380.50   | 329.00   | 305.50   | 1,386.50  |
| 932 | 2,930.50 | 2,472.50 | 2,344.00 | 2,270.00 | 10,017.00 |
| 933 | 1,310.00 | 1,434.50 | 1,290.00 | 1,208.50 | 5,243.00  |
| 934 | 1,757.50 | 2,070.00 | 1,559.50 | 1,601.00 | 6,988.00  |
| 935 | 1,410.00 | 1,330.00 | 1,236.00 | 1,185.50 | 5,161.50  |
| 936 | 2,133.50 | 2,314.00 | 1,782.50 | 1,910.00 | 8,140.00  |
| 937 | 2,693.00 | 2,677.00 | 3,074.00 | 2,795.50 | 11,239.50 |
| 939 | 1,334.50 | 751.50   | 955.50   | 698.00   | 3,739.50  |
| 940 | 1,137.00 | 1,215.50 | 1,170.00 | 1,174.00 | 4,696.50  |
| 941 | 495.50   | 571.50   | 629.00   | 690.50   | 2,386.50  |
| 943 | 0        | 78.00    | 67.00    | 11.00    | 156.00    |
| 944 | 176.00   | 205.00   | 237.00   | 209.50   | 827.50    |
| 945 | 3,490.00 | 3,184.50 | 3,404.00 | 3,235.00 | 13,313.50 |
| 946 | 249.50   | 289.50   | 292.00   | 203.50   | 1,034.50  |
| 947 | 70.00    | 93.00    | 54.00    | 61.00    | 278.00    |
| 948 | 24.00    | 21.00    | 13.50    | 7.50     | 66.00     |
| 949 | 206.50   | 261.50   | 306.00   | 206.50   | 980.50    |
| 950 | 731.50   | 645.00   | 704.00   | 508.00   | 2,588.50  |
| 951 | 372.00   | 390.00   | 270.00   | 345.00   | 1,377.00  |
| 952 | 301.50   | 347.00   | 389.50   | 440.50   | 1,478.50  |
| 953 | 1,907.00 | 1,468.00 | 1,532.50 | 1,547.50 | 6,455.00  |
| 954 | 458.00   | 360.50   | 359.00   | 534.00   | 1,711.50  |
| 955 | 45.00    | 34.00    | 9.00     | 3.00     | 91.00     |
| 956 | 2,027.00 | 1,828.50 | 2,137.50 | 1,977.00 | 7,970.00  |
| 957 | 673.50   | 561.00   | 441.50   | 436.00   | 2,112.00  |
| 958 | 1,474.50 | 1,671.00 | 1,471.00 | 1,486.50 | 6,103.00  |
| 959 | 1,768.50 | 1,425.00 | 1,408.50 | 1,281.50 | 5,883.50  |
| 960 | 984.00   | 782.00   | 701.00   | 482.00   | 2,949.00  |
| 961 | 5.00     | 0        | 12.00    | 6.00     | 23.00     |

|                                |                  |                  |                  |                  |                   |
|--------------------------------|------------------|------------------|------------------|------------------|-------------------|
| <b>CA - CALIFORNIA - Total</b> | <b>85,686.40</b> | <b>82,514.43</b> | <b>78,783.45</b> | <b>76,734.95</b> | <b>323,719.23</b> |
|--------------------------------|------------------|------------------|------------------|------------------|-------------------|

**STATE: CO - COLORADO**

| REGISTRANT ZIP CODE 3        | 1ST QUARTER      | 2ND QUARTER      | 3RD QUARTER      | 4TH QUARTER      | TOTAL GRAMS       |
|------------------------------|------------------|------------------|------------------|------------------|-------------------|
| 800                          | 3,241.50         | 3,331.00         | 3,127.00         | 3,245.50         | 12,945.00         |
| 801                          | 5,723.00         | 5,262.00         | 5,431.50         | 5,956.00         | 22,372.50         |
| 802                          | 3,705.50         | 2,907.50         | 2,916.00         | 2,564.50         | 12,093.50         |
| 803                          | 705.50           | 686.50           | 593.00           | 671.50           | 2,656.50          |
| 804                          | 731.00           | 606.00           | 593.50           | 596.50           | 2,527.00          |
| 805                          | 2,859.00         | 3,153.00         | 3,231.00         | 3,322.00         | 12,565.00         |
| 806                          | 1,530.50         | 1,352.00         | 1,388.00         | 1,415.50         | 5,686.00          |
| 807                          | 266.00           | 217.00           | 203.00           | 238.50           | 924.50            |
| 808                          | 511.50           | 399.00           | 399.00           | 437.00           | 1,746.50          |
| 809                          | 3,895.00         | 3,946.00         | 3,786.00         | 3,393.00         | 15,020.00         |
| 810                          | 2,041.00         | 1,806.00         | 1,743.00         | 1,424.00         | 7,014.00          |
| 811                          | 81.50            | 123.00           | 76.00            | 115.50           | 396.00            |
| 812                          | 473.00           | 384.00           | 277.00           | 470.00           | 1,604.00          |
| 813                          | 260.50           | 188.00           | 202.50           | 205.50           | 856.50            |
| 814                          | 53.00            | 79.00            | 72.00            | 83.00            | 287.00            |
| 815                          | 536.50           | 569.00           | 390.00           | 357.50           | 1,853.00          |
| 816                          | 133.00           | 135.50           | 152.00           | 267.00           | 687.50            |
| <b>CO - COLORADO - Total</b> | <b>26,747.00</b> | <b>25,144.50</b> | <b>24,580.50</b> | <b>24,762.50</b> | <b>101,234.50</b> |

**STATE: CT - CONNECTICUT**

| REGISTRANT ZIP CODE 3           | 1ST QUARTER     | 2ND QUARTER     | 3RD QUARTER     | 4TH QUARTER     | TOTAL GRAMS      |
|---------------------------------|-----------------|-----------------|-----------------|-----------------|------------------|
| 060                             | 1,357.50        | 1,387.00        | 1,228.50        | 1,306.50        | 5,279.50         |
| 061                             | 332.50          | 440.00          | 362.00          | 378.50          | 1,513.00         |
| 062                             | 551.00          | 505.50          | 554.00          | 482.00          | 2,092.50         |
| 063                             | 1,005.50        | 1,113.50        | 1,068.00        | 1,398.00        | 4,585.00         |
| 064                             | 2,228.00        | 2,314.00        | 2,243.50        | 2,185.00        | 8,970.50         |
| 065                             | 530.00          | 590.50          | 632.00          | 647.50          | 2,400.00         |
| 066                             | 225.00          | 313.50          | 384.50          | 338.50          | 1,261.50         |
| 067                             | 836.50          | 974.00          | 696.50          | 669.00          | 3,176.00         |
| 068                             | 1,008.50        | 1,164.00        | 1,053.50        | 1,136.50        | 4,362.50         |
| 069                             | 166.50          | 92.50           | 106.00          | 132.00          | 497.00           |
| <b>CT - CONNECTICUT - Total</b> | <b>8,241.00</b> | <b>8,894.50</b> | <b>8,328.50</b> | <b>8,673.50</b> | <b>34,137.50</b> |

**STATE: DC - DISTRICT OF COLUMBIA**

| REGISTRANT ZIP CODE 3              | 1ST QUARTER   | 2ND QUARTER   | 3RD QUARTER   | 4TH QUARTER   | TOTAL GRAMS     |
|------------------------------------|---------------|---------------|---------------|---------------|-----------------|
| 200                                | 864.00        | 860.00        | 807.00        | 765.00        | 3,296.00        |
| 204                                | 20.00         | 20.00         | 20.00         | 10.00         | 70.00           |
| <b>DC - DISTRICT OF COLUMBIA -</b> | <b>884.00</b> | <b>880.00</b> | <b>827.00</b> | <b>775.00</b> | <b>3,366.00</b> |

**STATE: DE - DELAWARE**

| REGISTRANT ZIP CODE 3        | 1ST QUARTER     | 2ND QUARTER     | 3RD QUARTER     | 4TH QUARTER     | TOTAL GRAMS      |
|------------------------------|-----------------|-----------------|-----------------|-----------------|------------------|
| 197                          | 1,943.50        | 2,107.50        | 2,229.00        | 2,179.50        | 8,459.50         |
| 198                          | 1,403.50        | 1,354.00        | 1,228.00        | 1,090.00        | 5,075.50         |
| 199                          | 2,184.50        | 2,173.50        | 2,156.00        | 1,855.50        | 8,369.50         |
| <b>DE - DELAWARE - Total</b> | <b>5,531.50</b> | <b>5,635.00</b> | <b>5,613.00</b> | <b>5,125.00</b> | <b>21,904.50</b> |

**STATE: FL - FLORIDA**

| REGISTRANT ZIP CODE 3       | 1ST QUARTER      | 2ND QUARTER      | 3RD QUARTER      | 4TH QUARTER      | TOTAL GRAMS       |
|-----------------------------|------------------|------------------|------------------|------------------|-------------------|
| 320                         | 2,520.50         | 2,434.00         | 2,004.00         | 2,257.50         | 9,216.00          |
| 321                         | 1,991.50         | 1,660.00         | 1,470.50         | 1,712.00         | 6,834.00          |
| 322                         | 4,285.50         | 4,360.00         | 3,803.50         | 3,277.00         | 15,726.00         |
| 323                         | 2,115.50         | 2,598.50         | 2,287.00         | 2,218.00         | 9,219.00          |
| 324                         | 1,278.50         | 1,363.50         | 1,232.00         | 1,082.50         | 4,956.50          |
| 325                         | 4,178.00         | 3,402.00         | 3,086.50         | 2,709.50         | 13,376.00         |
| 326                         | 1,468.50         | 1,493.50         | 1,417.50         | 1,448.50         | 5,828.00          |
| 327                         | 4,788.00         | 4,796.00         | 3,937.00         | 4,199.50         | 17,720.50         |
| 328                         | 2,040.00         | 2,314.50         | 2,014.00         | 2,022.50         | 8,391.00          |
| 329                         | 3,356.00         | 2,977.50         | 2,967.50         | 2,675.50         | 11,976.50         |
| 330                         | 2,310.00         | 2,369.50         | 2,239.50         | 2,381.50         | 9,300.50          |
| 331                         | 364.50           | 447.00           | 453.50           | 467.00           | 1,732.00          |
| 333                         | 1,748.50         | 1,844.50         | 1,684.50         | 1,495.50         | 6,773.00          |
| 334                         | 6,446.50         | 6,301.00         | 5,887.00         | 5,870.00         | 24,504.50         |
| 335                         | 5,200.00         | 4,911.00         | 4,202.50         | 4,398.50         | 18,712.00         |
| 336                         | 3,129.00         | 3,319.50         | 3,076.50         | 2,704.50         | 12,229.50         |
| 337                         | 2,739.00         | 3,113.50         | 2,780.50         | 2,717.50         | 11,350.50         |
| 338                         | 2,619.00         | 2,349.00         | 2,105.50         | 2,170.00         | 9,243.50          |
| 339                         | 8,097.50         | 8,074.00         | 7,126.00         | 6,499.50         | 29,797.00         |
| 341                         | 3,512.50         | 3,422.00         | 2,633.50         | 2,950.50         | 12,518.50         |
| 342                         | 4,556.00         | 4,525.50         | 3,610.00         | 3,853.00         | 16,544.50         |
| 344                         | 1,859.00         | 1,909.00         | 1,503.50         | 1,684.00         | 6,955.50          |
| 346                         | 3,305.00         | 2,899.50         | 2,644.50         | 2,696.00         | 11,545.00         |
| 347                         | 2,305.00         | 2,485.00         | 2,031.00         | 2,087.50         | 8,908.50          |
| 349                         | 1,963.50         | 2,062.00         | 2,085.50         | 1,800.50         | 7,911.50          |
| <b>FL - FLORIDA - Total</b> | <b>78,177.00</b> | <b>77,431.50</b> | <b>68,283.00</b> | <b>67,378.00</b> | <b>291,269.50</b> |

**STATE: GA - GEORGIA**

| REGISTRANT ZIP CODE 3 | 1ST QUARTER | 2ND QUARTER | 3RD QUARTER | 4TH QUARTER | TOTAL GRAMS |
|-----------------------|-------------|-------------|-------------|-------------|-------------|
| 300                   | 9,939.00    | 9,732.00    | 9,458.00    | 9,057.00    | 38,186.00   |
| 301                   | 7,715.50    | 7,952.00    | 7,320.50    | 7,142.00    | 30,130.00   |
| 302                   | 4,220.50    | 4,270.00    | 4,471.50    | 4,594.50    | 17,556.50   |
| 303                   | 2,862.00    | 2,601.00    | 2,526.50    | 2,802.50    | 10,792.00   |
| 304                   | 3,185.50    | 2,659.50    | 2,685.50    | 2,676.00    | 11,206.50   |

|                             |                  |                  |                  |                  |                   |
|-----------------------------|------------------|------------------|------------------|------------------|-------------------|
| 305                         | 2,862.00         | 2,950.50         | 2,814.00         | 2,943.00         | 11,569.50         |
| 306                         | 1,510.00         | 1,696.00         | 1,530.00         | 1,523.50         | 6,259.50          |
| 307                         | 1,265.50         | 1,080.50         | 1,000.50         | 1,006.50         | 4,353.00          |
| 308                         | 492.50           | 553.00           | 492.00           | 543.50           | 2,081.00          |
| 309                         | 833.50           | 876.50           | 791.50           | 801.50           | 3,303.00          |
| 310                         | 2,851.00         | 2,774.00         | 2,621.00         | 2,694.00         | 10,940.00         |
| 312                         | 682.00           | 716.00           | 675.00           | 677.00           | 2,750.00          |
| 313                         | 3,011.50         | 3,629.00         | 3,483.50         | 3,211.50         | 13,335.50         |
| 314                         | 1,722.00         | 1,834.50         | 1,715.50         | 1,622.00         | 6,894.00          |
| 315                         | 5,270.50         | 5,744.00         | 5,511.50         | 5,243.00         | 21,769.00         |
| 316                         | 1,253.50         | 1,079.00         | 1,007.50         | 1,191.50         | 4,531.50          |
| 317                         | 1,210.00         | 1,059.00         | 1,098.00         | 1,235.50         | 4,602.50          |
| 318                         | 147.00           | 177.50           | 173.50           | 177.50           | 675.50            |
| 319                         | 797.00           | 817.50           | 727.50           | 692.00           | 3,034.00          |
| 398                         | 276.50           | 276.50           | 277.50           | 240.00           | 1,070.50          |
| <b>GA - GEORGIA - Total</b> | <b>52,107.00</b> | <b>52,478.00</b> | <b>50,380.50</b> | <b>50,074.00</b> | <b>205,039.50</b> |

**STATE: HI - HAWAII**

| REGISTRANT ZIP CODE 3      | 1ST QUARTER     | 2ND QUARTER     | 3RD QUARTER     | 4TH QUARTER     | TOTAL GRAMS     |
|----------------------------|-----------------|-----------------|-----------------|-----------------|-----------------|
| 967                        | 1,261.00        | 1,002.00        | 875.50          | 883.00          | 4,021.50        |
| 968                        | 1,240.00        | 1,029.00        | 921.00          | 870.50          | 4,060.50        |
| <b>HI - HAWAII - Total</b> | <b>2,501.00</b> | <b>2,031.00</b> | <b>1,796.50</b> | <b>1,753.50</b> | <b>8,082.00</b> |

**STATE: IA - IOWA**

| REGISTRANT ZIP CODE 3 | 1ST QUARTER | 2ND QUARTER | 3RD QUARTER | 4TH QUARTER | TOTAL GRAMS |
|-----------------------|-------------|-------------|-------------|-------------|-------------|
| 500                   | 1,564.50    | 1,245.00    | 1,195.00    | 1,225.50    | 5,230.00    |
| 501                   | 777.00      | 739.00      | 763.00      | 831.00      | 3,110.00    |
| 502                   | 1,287.00    | 1,119.50    | 1,196.50    | 1,238.00    | 4,841.00    |
| 503                   | 2,006.50    | 1,767.50    | 1,654.00    | 1,728.50    | 7,156.50    |
| 504                   | 69.00       | 107.00      | 87.00       | 68.00       | 331.00      |
| 505                   | 195.50      | 202.00      | 220.00      | 184.00      | 801.50      |
| 506                   | 372.00      | 409.00      | 327.00      | 374.00      | 1,482.00    |
| 507                   | 273.00      | 236.00      | 243.50      | 288.50      | 1,041.00    |
| 508                   | 175.00      | 142.00      | 138.00      | 123.00      | 578.00      |
| 510                   | 197.00      | 158.00      | 221.00      | 245.00      | 821.00      |
| 511                   | 305.50      | 312.00      | 339.50      | 385.50      | 1,342.50    |
| 512                   | 127.50      | 115.00      | 85.00       | 127.50      | 455.00      |
| 513                   | 156.00      | 120.50      | 258.50      | 209.50      | 744.50      |
| 514                   | 20.00       | 15.00       | 0           | 30.00       | 65.00       |
| 515                   | 334.50      | 451.00      | 486.00      | 398.00      | 1,669.50    |
| 516                   | 133.00      | 285.50      | 211.00      | 248.00      | 877.50      |
| 520                   | 264.00      | 374.00      | 315.00      | 226.00      | 1,179.00    |

|                          |                  |                 |                 |                 |                  |
|--------------------------|------------------|-----------------|-----------------|-----------------|------------------|
| 521                      | 80.00            | 45.00           | 52.50           | 42.50           | 220.00           |
| 522                      | 212.00           | 150.00          | 65.00           | 55.00           | 482.00           |
| 523                      | 277.50           | 182.50          | 136.50          | 100.00          | 696.50           |
| 524                      | 376.50           | 273.50          | 365.00          | 269.00          | 1,284.00         |
| 525                      | 352.00           | 273.50          | 182.00          | 206.00          | 1,013.50         |
| 526                      | 140.50           | 77.50           | 105.00          | 66.00           | 389.00           |
| 527                      | 84.00            | 136.00          | 124.50          | 164.00          | 508.50           |
| 528                      | 221.00           | 230.00          | 194.00          | 142.00          | 787.00           |
| <b>IA - IOWA - Total</b> | <b>10,000.50</b> | <b>9,166.00</b> | <b>8,964.50</b> | <b>8,974.50</b> | <b>37,105.50</b> |

**STATE: ID - IDAHO**

| REGISTRANT ZIP CODE 3     | 1ST QUARTER     | 2ND QUARTER     | 3RD QUARTER     | 4TH QUARTER     | TOTAL GRAMS      |
|---------------------------|-----------------|-----------------|-----------------|-----------------|------------------|
| 832                       | 1,341.00        | 1,350.50        | 1,415.50        | 1,111.00        | 5,218.00         |
| 833                       | 389.00          | 426.00          | 406.00          | 449.50          | 1,670.50         |
| 834                       | 686.00          | 772.00          | 854.00          | 850.00          | 3,162.00         |
| 835                       | 183.00          | 195.00          | 115.00          | 103.00          | 596.00           |
| 836                       | 1,378.50        | 1,509.50        | 1,387.00        | 1,263.00        | 5,538.00         |
| 837                       | 994.50          | 1,041.50        | 789.00          | 629.00          | 3,454.00         |
| 838                       | 508.00          | 545.00          | 631.00          | 504.00          | 2,188.00         |
| <b>ID - IDAHO - Total</b> | <b>5,480.00</b> | <b>5,839.50</b> | <b>5,597.50</b> | <b>4,909.50</b> | <b>21,826.50</b> |

**STATE: IL - ILLINOIS**

| REGISTRANT ZIP CODE 3 | 1ST QUARTER | 2ND QUARTER | 3RD QUARTER | 4TH QUARTER | TOTAL GRAMS |
|-----------------------|-------------|-------------|-------------|-------------|-------------|
| 600                   | 4,875.00    | 4,931.50    | 4,680.00    | 4,731.50    | 19,218.00   |
| 601                   | 2,569.00    | 2,755.00    | 2,334.00    | 2,584.50    | 10,242.50   |
| 602                   | 253.50      | 223.50      | 196.50      | 169.50      | 843.00      |
| 603                   | 355.50      | 377.50      | 419.00      | 376.00      | 1,528.00    |
| 604                   | 3,254.00    | 3,351.00    | 3,337.50    | 3,067.50    | 13,010.00   |
| 605                   | 3,173.50    | 2,899.00    | 3,046.00    | 3,181.50    | 12,300.00   |
| 606                   | 1,938.00    | 1,863.00    | 1,596.00    | 1,556.00    | 6,953.00    |
| 607                   | 330.00      | 404.50      | 252.50      | 229.50      | 1,216.50    |
| 608                   | 313.50      | 180.50      | 204.00      | 264.50      | 962.50      |
| 609                   | 597.50      | 584.00      | 705.50      | 621.00      | 2,508.00    |
| 610                   | 700.50      | 806.50      | 823.50      | 748.50      | 3,079.00    |
| 611                   | 1,116.00    | 925.00      | 848.50      | 829.50      | 3,719.00    |
| 612                   | 150.50      | 151.50      | 125.00      | 153.00      | 580.00      |
| 613                   | 57.00       | 128.00      | 208.00      | 135.00      | 528.00      |
| 614                   | 80.00       | 88.00       | 80.00       | 15.50       | 263.50      |
| 615                   | 453.00      | 423.00      | 393.00      | 470.00      | 1,739.00    |
| 616                   | 306.50      | 232.00      | 301.00      | 236.00      | 1,075.50    |
| 617                   | 755.00      | 602.50      | 704.00      | 703.00      | 2,764.50    |
| 618                   | 1,880.50    | 1,663.00    | 1,580.50    | 1,638.50    | 6,762.50    |

|                              |                  |                  |                  |                  |                   |
|------------------------------|------------------|------------------|------------------|------------------|-------------------|
| 619                          | 215.00           | 253.00           | 190.00           | 251.50           | 909.50            |
| 620                          | 1,000.00         | 942.00           | 828.00           | 986.00           | 3,756.00          |
| 622                          | 2,997.50         | 2,887.50         | 2,597.50         | 2,739.00         | 11,221.50         |
| 623                          | 279.00           | 344.00           | 272.00           | 264.00           | 1,159.00          |
| 624                          | 105.00           | 165.00           | 126.00           | 136.50           | 532.50            |
| 625                          | 769.00           | 770.50           | 660.50           | 577.50           | 2,777.50          |
| 626                          | 113.00           | 132.00           | 106.00           | 109.00           | 460.00            |
| 627                          | 131.50           | 188.00           | 152.00           | 187.00           | 658.50            |
| 628                          | 352.50           | 433.00           | 374.50           | 455.00           | 1,615.00          |
| 629                          | 360.00           | 469.00           | 390.50           | 375.50           | 1,595.00          |
| <b>IL - ILLINOIS - Total</b> | <b>29,481.00</b> | <b>29,173.00</b> | <b>27,531.50</b> | <b>27,791.50</b> | <b>113,977.00</b> |

**STATE: IN - INDIANA**

| REGISTRANT ZIP CODE 3       | 1ST QUARTER      | 2ND QUARTER      | 3RD QUARTER      | 4TH QUARTER      | TOTAL GRAMS       |
|-----------------------------|------------------|------------------|------------------|------------------|-------------------|
| 460                         | 1,397.50         | 1,374.50         | 1,099.00         | 1,141.50         | 5,012.50          |
| 461                         | 2,189.00         | 1,935.50         | 2,293.00         | 2,285.50         | 8,703.00          |
| 462                         | 1,885.00         | 1,963.00         | 1,638.50         | 1,671.50         | 7,158.00          |
| 463                         | 3,830.00         | 3,523.50         | 3,399.50         | 3,452.50         | 14,205.50         |
| 464                         | 412.00           | 331.00           | 338.50           | 335.50           | 1,417.00          |
| 465                         | 2,371.00         | 2,318.50         | 2,053.00         | 2,076.00         | 8,818.50          |
| 466                         | 629.50           | 712.00           | 694.00           | 578.50           | 2,614.00          |
| 467                         | 2,602.00         | 2,524.00         | 2,282.50         | 2,489.00         | 9,897.50          |
| 468                         | 3,681.00         | 3,730.50         | 3,444.00         | 3,416.00         | 14,271.50         |
| 469                         | 1,021.00         | 1,297.00         | 1,050.50         | 1,124.00         | 4,492.50          |
| 470                         | 295.50           | 336.50           | 269.00           | 265.00           | 1,166.00          |
| 471                         | 930.50           | 930.50           | 794.00           | 669.50           | 3,324.50          |
| 472                         | 616.00           | 583.00           | 554.00           | 618.50           | 2,371.50          |
| 473                         | 534.00           | 602.00           | 671.00           | 663.00           | 2,470.00          |
| 474                         | 688.50           | 642.50           | 656.00           | 619.00           | 2,606.00          |
| 475                         | 654.50           | 600.50           | 757.50           | 736.00           | 2,748.50          |
| 476                         | 508.00           | 611.50           | 548.00           | 660.50           | 2,328.00          |
| 477                         | 1,216.50         | 1,341.00         | 1,331.00         | 1,162.50         | 5,051.00          |
| 478                         | 4,919.00         | 4,841.00         | 4,327.00         | 4,311.50         | 18,398.50         |
| 479                         | 977.00           | 828.50           | 771.50           | 686.50           | 3,263.50          |
| <b>IN - INDIANA - Total</b> | <b>31,357.50</b> | <b>31,026.50</b> | <b>28,971.50</b> | <b>28,962.00</b> | <b>120,317.50</b> |

**STATE: KS - KANSAS**

| REGISTRANT ZIP CODE 3 | 1ST QUARTER | 2ND QUARTER | 3RD QUARTER | 4TH QUARTER | TOTAL GRAMS |
|-----------------------|-------------|-------------|-------------|-------------|-------------|
| 660                   | 1,838.50    | 1,795.50    | 1,648.50    | 1,514.00    | 6,796.50    |
| 661                   | 213.50      | 161.00      | 188.00      | 183.50      | 746.00      |
| 662                   | 1,486.50    | 1,313.50    | 1,378.50    | 1,204.50    | 5,383.00    |
| 664                   | 196.00      | 185.00      | 138.00      | 165.00      | 684.00      |

|                            |                 |                 |                 |                 |                  |
|----------------------------|-----------------|-----------------|-----------------|-----------------|------------------|
| 665                        | 259.00          | 270.00          | 327.50          | 216.50          | 1,073.00         |
| 666                        | 882.00          | 762.00          | 735.00          | 770.00          | 3,149.00         |
| 667                        | 354.00          | 247.00          | 195.50          | 210.00          | 1,006.50         |
| 668                        | 102.50          | 90.00           | 104.50          | 128.00          | 425.00           |
| 669                        | 0               | 0               | 7.50            | 11.00           | 18.50            |
| 670                        | 94.00           | 96.00           | 161.50          | 116.00          | 467.50           |
| 671                        | 156.00          | 118.00          | 114.00          | 146.00          | 534.00           |
| 672                        | 616.50          | 608.00          | 663.00          | 575.00          | 2,462.50         |
| 673                        | 310.00          | 205.00          | 187.00          | 136.00          | 838.00           |
| 674                        | 299.50          | 201.00          | 207.00          | 164.00          | 871.50           |
| 675                        | 121.00          | 169.00          | 138.00          | 150.00          | 578.00           |
| 676                        | 191.50          | 90.00           | 74.00           | 94.00           | 449.50           |
| 677                        | 69.00           | 106.00          | 68.00           | 69.00           | 312.00           |
| 678                        | 65.00           | 30.00           | 42.00           | 24.00           | 161.00           |
| 679                        | 5.00            | 9.00            | 0               | 0               | 14.00            |
| <b>KS - KANSAS - Total</b> | <b>7,259.50</b> | <b>6,456.00</b> | <b>6,377.50</b> | <b>5,876.50</b> | <b>25,969.50</b> |

**STATE: KY - KENTUCKY**

| REGISTRANT ZIP CODE 3 | 1ST QUARTER | 2ND QUARTER | 3RD QUARTER | 4TH QUARTER | TOTAL GRAMS |
|-----------------------|-------------|-------------|-------------|-------------|-------------|
| 400                   | 530.50      | 530.00      | 584.50      | 492.50      | 2,137.50    |
| 401                   | 244.00      | 344.50      | 243.50      | 278.00      | 1,110.00    |
| 402                   | 2,283.00    | 2,116.50    | 1,735.50    | 1,748.50    | 7,883.50    |
| 403                   | 599.00      | 656.50      | 519.00      | 498.50      | 2,273.00    |
| 404                   | 430.00      | 328.00      | 311.00      | 318.50      | 1,387.50    |
| 405                   | 605.50      | 727.00      | 494.50      | 591.00      | 2,418.00    |
| 406                   | 52.00       | 28.00       | 65.00       | 30.00       | 175.00      |
| 407                   | 85.50       | 175.50      | 186.00      | 127.50      | 574.50      |
| 408                   | 6.00        | 0           | 3.00        | 46.00       | 55.00       |
| 409                   | 15.00       | 20.00       | 22.50       | 35.00       | 92.50       |
| 410                   | 2,118.50    | 2,071.00    | 1,788.50    | 1,958.00    | 7,936.00    |
| 411                   | 194.00      | 194.50      | 143.00      | 171.00      | 702.50      |
| 412                   | 45.00       | 35.50       | 30.50       | 59.50       | 170.50      |
| 413                   | 7.50        | 0           | 0           | 0           | 7.50        |
| 414                   | 0           | 0           | 0           | 10.00       | 10.00       |
| 415                   | 152.50      | 128.00      | 116.00      | 124.00      | 520.50      |
| 416                   | 223.00      | 131.00      | 118.50      | 88.50       | 561.00      |
| 417                   | 43.50       | 88.50       | 47.50       | 54.00       | 233.50      |
| 418                   | 70.00       | 43.00       | 39.00       | 35.00       | 187.00      |
| 420                   | 1,482.50    | 1,684.50    | 1,682.00    | 1,511.50    | 6,360.50    |
| 421                   | 403.00      | 368.00      | 285.50      | 515.50      | 1,572.00    |
| 422                   | 859.00      | 465.00      | 1,005.00    | 581.00      | 2,910.00    |

|                              |                  |                  |                  |                  |                  |
|------------------------------|------------------|------------------|------------------|------------------|------------------|
| 423                          | 1,116.50         | 1,069.00         | 1,110.50         | 1,140.00         | 4,436.00         |
| 424                          | 556.50           | 429.00           | 433.00           | 417.00           | 1,835.50         |
| 425                          | 35.00            | 50.00            | 30.00            | 35.00            | 150.00           |
| 426                          | 21.00            | 25.00            | 15.00            | 25.00            | 86.00            |
| 427                          | 592.50           | 541.00           | 406.50           | 460.50           | 2,000.50         |
| <b>KY - KENTUCKY - Total</b> | <b>12,770.50</b> | <b>12,249.00</b> | <b>11,415.00</b> | <b>11,351.00</b> | <b>47,785.50</b> |

**STATE: LA - LOUISIANA**

| REGISTRANT ZIP CODE 3         | 1ST QUARTER      | 2ND QUARTER      | 3RD QUARTER      | 4TH QUARTER      | TOTAL GRAMS      |
|-------------------------------|------------------|------------------|------------------|------------------|------------------|
| 700                           | 1,768.50         | 1,635.50         | 1,682.50         | 1,635.00         | 6,721.50         |
| 701                           | 160.00           | 177.00           | 126.50           | 165.00           | 628.50           |
| 703                           | 501.00           | 492.50           | 594.50           | 403.00           | 1,991.00         |
| 704                           | 2,480.00         | 2,537.00         | 2,560.00         | 2,889.00         | 10,466.00        |
| 705                           | 1,305.00         | 1,536.50         | 1,262.00         | 1,279.50         | 5,383.00         |
| 706                           | 431.00           | 414.00           | 397.00           | 392.50           | 1,634.50         |
| 707                           | 2,551.50         | 2,529.00         | 2,549.50         | 2,468.00         | 10,098.00        |
| 708                           | 1,214.50         | 1,182.50         | 1,056.00         | 949.00           | 4,402.00         |
| 710                           | 237.50           | 285.50           | 315.50           | 221.50           | 1,060.00         |
| 711                           | 1,115.00         | 1,220.50         | 1,214.50         | 1,260.50         | 4,810.50         |
| 712                           | 387.50           | 404.00           | 411.00           | 386.50           | 1,589.00         |
| 713                           | 769.50           | 711.50           | 576.50           | 677.50           | 2,735.00         |
| 714                           | 309.50           | 453.00           | 357.50           | 403.50           | 1,523.50         |
| <b>LA - LOUISIANA - Total</b> | <b>13,230.50</b> | <b>13,578.50</b> | <b>13,103.00</b> | <b>13,130.50</b> | <b>53,042.50</b> |

**STATE: MA - MASSACHUSETTS**

| REGISTRANT ZIP CODE 3 | 1ST QUARTER | 2ND QUARTER | 3RD QUARTER | 4TH QUARTER | TOTAL GRAMS |
|-----------------------|-------------|-------------|-------------|-------------|-------------|
| 010                   | 611.50      | 829.50      | 858.00      | 862.50      | 3,161.50    |
| 011                   | 230.50      | 319.50      | 236.00      | 269.00      | 1,055.00    |
| 012                   | 58.00       | 85.00       | 70.00       | 70.00       | 283.00      |
| 013                   | 68.00       | 91.00       | 80.50       | 139.50      | 379.00      |
| 014                   | 434.50      | 270.00      | 239.00      | 277.50      | 1,221.00    |
| 015                   | 519.50      | 482.00      | 453.00      | 512.00      | 1,966.50    |
| 016                   | 207.50      | 260.50      | 187.00      | 164.00      | 819.00      |
| 017                   | 499.50      | 551.50      | 596.50      | 667.50      | 2,315.00    |
| 018                   | 8,339.50    | 8,288.50    | 8,395.50    | 8,075.50    | 33,099.00   |
| 019                   | 1,124.50    | 1,201.00    | 1,202.50    | 1,497.50    | 5,025.50    |
| 020                   | 368.00      | 451.00      | 337.50      | 308.00      | 1,464.50    |
| 021                   | 742.00      | 749.50      | 697.50      | 738.00      | 2,927.00    |
| 022                   | 80.50       | 74.50       | 133.50      | 72.50       | 361.00      |
| 023                   | 531.00      | 684.00      | 647.00      | 748.00      | 2,610.00    |
| 024                   | 137.50      | 284.00      | 260.00      | 281.00      | 962.50      |
| 025                   | 202.50      | 166.00      | 80.50       | 81.00       | 530.00      |



|                                   |                  |                  |                  |                  |                  |
|-----------------------------------|------------------|------------------|------------------|------------------|------------------|
| 026                               | 222.50           | 253.50           | 291.00           | 312.50           | 1,079.50         |
| 027                               | 1,486.00         | 1,989.00         | 1,800.00         | 1,523.50         | 6,798.50         |
| <b>MA - MASSACHUSETTS - Total</b> | <b>15,863.00</b> | <b>17,030.00</b> | <b>16,565.00</b> | <b>16,599.50</b> | <b>66,057.50</b> |

**STATE: MD - MARYLAND**

| REGISTRANT ZIP CODE 3        | 1ST QUARTER      | 2ND QUARTER      | 3RD QUARTER      | 4TH QUARTER      | TOTAL GRAMS       |
|------------------------------|------------------|------------------|------------------|------------------|-------------------|
| 206                          | 2,140.00         | 2,089.50         | 2,186.50         | 2,179.50         | 8,595.50          |
| 207                          | 1,919.50         | 2,315.00         | 2,094.00         | 1,992.50         | 8,321.00          |
| 208                          | 2,398.50         | 3,171.50         | 2,738.00         | 2,408.00         | 10,716.00         |
| 209                          | 304.00           | 320.50           | 278.50           | 340.00           | 1,243.00          |
| 210                          | 5,648.50         | 5,694.50         | 5,221.00         | 5,169.00         | 21,733.00         |
| 211                          | 2,324.50         | 2,529.50         | 2,478.50         | 2,462.50         | 9,795.00          |
| 212                          | 2,840.50         | 2,990.00         | 2,994.50         | 2,930.00         | 11,755.00         |
| 214                          | 837.50           | 791.00           | 924.00           | 800.50           | 3,353.00          |
| 215                          | 511.00           | 266.00           | 252.00           | 291.00           | 1,320.00          |
| 216                          | 1,335.50         | 1,421.50         | 1,384.50         | 1,386.00         | 5,527.50          |
| 217                          | 4,045.50         | 3,910.00         | 3,915.50         | 3,860.00         | 15,731.00         |
| 218                          | 636.00           | 817.50           | 820.50           | 778.50           | 3,052.50          |
| 219                          | 394.00           | 422.00           | 343.00           | 341.00           | 1,500.00          |
| <b>MD - MARYLAND - Total</b> | <b>25,335.00</b> | <b>26,738.50</b> | <b>25,630.50</b> | <b>24,938.50</b> | <b>102,642.50</b> |

**STATE: ME - MAINE**

| REGISTRANT ZIP CODE 3     | 1ST QUARTER     | 2ND QUARTER     | 3RD QUARTER     | 4TH QUARTER     | TOTAL GRAMS     |
|---------------------------|-----------------|-----------------|-----------------|-----------------|-----------------|
| 039                       | 69.00           | 54.00           | 73.50           | 68.00           | 264.50          |
| 040                       | 245.00          | 326.00          | 325.50          | 204.50          | 1,101.00        |
| 041                       | 26.00           | 63.00           | 25.00           | 45.00           | 159.00          |
| 042                       | 290.50          | 239.00          | 314.00          | 271.50          | 1,115.00        |
| 043                       | 31.00           | 29.50           | 28.50           | 55.00           | 144.00          |
| 044                       | 58.00           | 27.00           | 57.00           | 71.00           | 213.00          |
| 045                       | 53.00           | 80.00           | 64.00           | 86.50           | 283.50          |
| 046                       | 9.00            | 30.00           | 42.50           | 32.50           | 114.00          |
| 047                       | 117.00          | 199.00          | 170.00          | 157.00          | 643.00          |
| 048                       | 18.00           | 27.00           | 27.00           | 27.00           | 99.00           |
| 049                       | 119.00          | 173.00          | 162.00          | 106.00          | 560.00          |
| <b>ME - MAINE - Total</b> | <b>1,035.50</b> | <b>1,247.50</b> | <b>1,289.00</b> | <b>1,124.00</b> | <b>4,696.00</b> |

**STATE: MI - MICHIGAN**

| REGISTRANT ZIP CODE 3 | 1ST QUARTER | 2ND QUARTER | 3RD QUARTER | 4TH QUARTER | TOTAL GRAMS |
|-----------------------|-------------|-------------|-------------|-------------|-------------|
| 480                   | 2,430.50    | 2,163.00    | 1,889.00    | 1,764.50    | 8,247.00    |
| 481                   | 2,820.00    | 2,821.50    | 2,508.50    | 2,679.50    | 10,829.50   |
| 482                   | 228.50      | 271.50      | 195.00      | 235.50      | 930.50      |
| 483                   | 2,228.50    | 1,924.00    | 1,633.50    | 1,637.50    | 7,423.50    |
| 484                   | 326.00      | 337.00      | 452.00      | 477.00      | 1,592.00    |

|                              |                  |                  |                  |                  |                  |
|------------------------------|------------------|------------------|------------------|------------------|------------------|
| 485                          | 542.00           | 493.00           | 480.50           | 537.00           | 2,052.50         |
| 486                          | 609.50           | 640.00           | 566.50           | 449.50           | 2,265.50         |
| 487                          | 457.00           | 286.00           | 415.00           | 328.00           | 1,486.00         |
| 488                          | 1,500.50         | 1,510.00         | 1,514.50         | 1,363.50         | 5,888.50         |
| 489                          | 389.00           | 315.50           | 270.50           | 293.50           | 1,268.50         |
| 490                          | 1,855.00         | 1,931.00         | 1,986.50         | 1,682.00         | 7,454.50         |
| 491                          | 368.50           | 393.00           | 382.50           | 413.00           | 1,557.00         |
| 492                          | 458.50           | 360.00           | 409.50           | 434.50           | 1,662.50         |
| 493                          | 1,057.50         | 867.00           | 787.00           | 784.00           | 3,495.50         |
| 494                          | 610.00           | 619.00           | 676.00           | 598.50           | 2,503.50         |
| 495                          | 1,054.50         | 764.00           | 789.50           | 752.00           | 3,360.00         |
| 496                          | 561.00           | 606.50           | 574.50           | 729.00           | 2,471.00         |
| 497                          | 361.00           | 549.00           | 506.00           | 599.00           | 2,015.00         |
| 498                          | 262.00           | 175.00           | 155.00           | 125.00           | 717.00           |
| 499                          | 55.00            | 70.00            | 137.00           | 49.00            | 311.00           |
| <b>MI - MICHIGAN - Total</b> | <b>18,174.50</b> | <b>17,096.00</b> | <b>16,328.50</b> | <b>15,931.50</b> | <b>67,530.50</b> |

**STATE: MN - MINNESOTA**

| REGISTRANT ZIP CODE 3         | 1ST QUARTER     | 2ND QUARTER     | 3RD QUARTER     | 4TH QUARTER     | TOTAL GRAMS      |
|-------------------------------|-----------------|-----------------|-----------------|-----------------|------------------|
| 550                           | 644.50          | 563.00          | 476.50          | 434.50          | 2,118.50         |
| 551                           | 539.00          | 634.00          | 638.50          | 757.50          | 2,569.00         |
| 553                           | 555.00          | 399.50          | 435.50          | 325.50          | 1,715.50         |
| 554                           | 846.00          | 709.50          | 596.00          | 641.50          | 2,793.00         |
| 556                           | 5.00            | 0               | 10.00           | 20.00           | 35.00            |
| 557                           | 18.00           | 46.00           | 28.00           | 10.00           | 102.00           |
| 558                           | 61.00           | 83.00           | 141.00          | 97.00           | 382.00           |
| 559                           | 120.00          | 135.00          | 137.50          | 144.00          | 536.50           |
| 560                           | 234.00          | 190.00          | 263.00          | 216.00          | 903.00           |
| 561                           | 288.00          | 178.00          | 292.50          | 260.00          | 1,018.50         |
| 562                           | 76.50           | 62.00           | 69.50           | 73.00           | 281.00           |
| 563                           | 155.00          | 198.00          | 144.50          | 250.00          | 747.50           |
| 564                           | 74.00           | 40.00           | 42.00           | 36.00           | 192.00           |
| 565                           | 147.00          | 148.00          | 133.00          | 125.00          | 553.00           |
| 566                           | 34.50           | 85.50           | 76.00           | 85.50           | 281.50           |
| 567                           | 165.00          | 173.00          | 205.50          | 179.00          | 722.50           |
| <b>MN - MINNESOTA - Total</b> | <b>3,962.50</b> | <b>3,644.50</b> | <b>3,689.00</b> | <b>3,654.50</b> | <b>14,950.50</b> |

**STATE: MO - MISSOURI**

| REGISTRANT ZIP CODE 3 | 1ST QUARTER | 2ND QUARTER | 3RD QUARTER | 4TH QUARTER | TOTAL GRAMS |
|-----------------------|-------------|-------------|-------------|-------------|-------------|
| 630                   | 2,657.50    | 2,323.00    | 2,217.00    | 1,974.00    | 9,171.50    |
| 631                   | 4,915.00    | 4,718.50    | 4,812.00    | 5,580.50    | 20,026.00   |
| 633                   | 2,345.50    | 2,549.50    | 2,342.00    | 2,245.00    | 9,482.00    |

|                              |                  |                  |                  |                  |                  |
|------------------------------|------------------|------------------|------------------|------------------|------------------|
| 634                          | 264.00           | 318.00           | 250.00           | 270.00           | 1,102.00         |
| 635                          | 223.00           | 199.00           | 239.00           | 138.50           | 799.50           |
| 636                          | 341.50           | 330.00           | 205.00           | 297.00           | 1,173.50         |
| 637                          | 1,024.50         | 905.00           | 608.50           | 615.50           | 3,153.50         |
| 638                          | 600.50           | 689.00           | 391.00           | 429.50           | 2,110.00         |
| 639                          | 234.00           | 314.00           | 248.50           | 257.50           | 1,054.00         |
| 640                          | 1,674.50         | 1,672.00         | 1,632.50         | 1,507.50         | 6,486.50         |
| 641                          | 1,229.00         | 1,046.00         | 894.50           | 902.50           | 4,072.00         |
| 644                          | 69.00            | 74.00            | 85.50            | 97.00            | 325.50           |
| 645                          | 539.50           | 451.50           | 425.50           | 231.00           | 1,647.50         |
| 646                          | 58.50            | 44.00            | 47.00            | 55.00            | 204.50           |
| 647                          | 261.50           | 378.50           | 328.00           | 333.50           | 1,301.50         |
| 648                          | 734.50           | 574.50           | 727.50           | 684.00           | 2,720.50         |
| 650                          | 267.00           | 512.50           | 433.50           | 323.50           | 1,536.50         |
| 651                          | 495.50           | 473.00           | 511.50           | 481.00           | 1,961.00         |
| 652                          | 534.50           | 455.50           | 411.00           | 393.00           | 1,794.00         |
| 653                          | 173.50           | 336.50           | 217.00           | 296.50           | 1,023.50         |
| 654                          | 154.00           | 219.00           | 209.50           | 235.00           | 817.50           |
| 655                          | 378.00           | 391.50           | 379.00           | 358.00           | 1,506.50         |
| 656                          | 542.50           | 666.00           | 521.00           | 423.50           | 2,153.00         |
| 657                          | 480.00           | 636.50           | 704.00           | 708.00           | 2,528.50         |
| 658                          | 731.50           | 926.50           | 755.00           | 686.50           | 3,099.50         |
| <b>MO - MISSOURI - Total</b> | <b>20,928.50</b> | <b>21,203.50</b> | <b>19,595.00</b> | <b>19,523.00</b> | <b>81,250.00</b> |

**STATE: MS - MISSISSIPPI**

| REGISTRANT ZIP CODE 3           | 1ST QUARTER     | 2ND QUARTER     | 3RD QUARTER     | 4TH QUARTER     | TOTAL GRAMS      |
|---------------------------------|-----------------|-----------------|-----------------|-----------------|------------------|
| 386                             | 844.50          | 707.00          | 759.00          | 720.00          | 3,030.50         |
| 387                             | 206.00          | 219.00          | 232.00          | 260.00          | 917.00           |
| 388                             | 1,077.50        | 1,036.50        | 1,113.00        | 1,032.00        | 4,259.00         |
| 389                             | 196.00          | 178.50          | 117.50          | 111.00          | 603.00           |
| 390                             | 1,016.00        | 941.50          | 934.00          | 894.50          | 3,786.00         |
| 391                             | 829.00          | 749.50          | 704.50          | 589.50          | 2,872.50         |
| 392                             | 945.00          | 915.00          | 835.00          | 790.00          | 3,485.00         |
| 393                             | 590.50          | 627.00          | 558.00          | 594.00          | 2,369.50         |
| 394                             | 1,297.50        | 1,083.00        | 1,038.00        | 1,041.50        | 4,460.00         |
| 395                             | 2,150.00        | 1,786.00        | 1,753.00        | 1,376.00        | 7,065.00         |
| 396                             | 194.50          | 229.00          | 301.00          | 250.00          | 974.50           |
| 397                             | 531.50          | 478.00          | 590.00          | 564.50          | 2,164.00         |
| <b>MS - MISSISSIPPI - Total</b> | <b>9,878.00</b> | <b>8,950.00</b> | <b>8,935.00</b> | <b>8,223.00</b> | <b>35,986.00</b> |

**STATE: MT - MONTANA**

| REGISTRANT ZIP CODE 3 | 1ST QUARTER | 2ND QUARTER | 3RD QUARTER | 4TH QUARTER | TOTAL GRAMS |
|-----------------------|-------------|-------------|-------------|-------------|-------------|
|-----------------------|-------------|-------------|-------------|-------------|-------------|

|                             |                 |                 |                 |                 |                 |
|-----------------------------|-----------------|-----------------|-----------------|-----------------|-----------------|
| 590                         | 161.00          | 166.00          | 155.00          | 186.00          | 668.00          |
| 591                         | 346.50          | 267.50          | 310.00          | 328.50          | 1,252.50        |
| 593                         | 95.00           | 92.00           | 68.00           | 60.00           | 315.00          |
| 594                         | 219.00          | 179.00          | 178.00          | 146.00          | 722.00          |
| 595                         | 32.00           | 56.00           | 75.50           | 83.00           | 246.50          |
| 596                         | 68.00           | 95.00           | 88.00           | 95.00           | 346.00          |
| 597                         | 291.50          | 421.50          | 370.00          | 349.50          | 1,432.50        |
| 598                         | 200.50          | 179.00          | 190.00          | 259.50          | 829.00          |
| 599                         | 77.00           | 92.00           | 90.00           | 57.00           | 316.00          |
| <b>MT - MONTANA - Total</b> | <b>1,490.50</b> | <b>1,548.00</b> | <b>1,524.50</b> | <b>1,564.50</b> | <b>6,127.50</b> |

**STATE: NC - NORTH CAROLINA**

| REGISTRANT ZIP CODE 3              | 1ST QUARTER      | 2ND QUARTER      | 3RD QUARTER      | 4TH QUARTER      | TOTAL GRAMS       |
|------------------------------------|------------------|------------------|------------------|------------------|-------------------|
| 270                                | 3,586.00         | 4,136.00         | 3,769.50         | 3,737.00         | 15,228.50         |
| 271                                | 4,988.50         | 4,537.50         | 4,299.00         | 4,442.50         | 18,267.50         |
| 272                                | 6,880.00         | 6,472.50         | 6,212.00         | 6,544.00         | 26,108.50         |
| 273                                | 3,924.00         | 4,190.50         | 3,858.00         | 4,250.50         | 16,223.00         |
| 274                                | 2,829.50         | 2,719.00         | 2,948.50         | 2,813.50         | 11,310.50         |
| 275                                | 8,688.50         | 9,622.50         | 9,704.50         | 10,624.50        | 38,640.00         |
| 276                                | 3,919.00         | 3,731.50         | 3,885.00         | 3,830.50         | 15,366.00         |
| 277                                | 1,887.00         | 2,189.50         | 1,765.00         | 2,093.00         | 7,934.50          |
| 278                                | 3,329.50         | 3,466.00         | 3,937.00         | 3,983.50         | 14,716.00         |
| 279                                | 1,425.00         | 1,737.00         | 1,598.00         | 1,535.00         | 6,295.00          |
| 280                                | 5,161.50         | 5,309.50         | 5,179.50         | 5,576.00         | 21,226.50         |
| 281                                | 3,996.00         | 4,306.50         | 4,446.50         | 4,428.00         | 17,177.00         |
| 282                                | 3,465.00         | 3,741.00         | 2,922.00         | 2,992.00         | 13,120.00         |
| 283                                | 4,775.50         | 5,102.50         | 4,998.50         | 5,811.50         | 20,688.00         |
| 284                                | 4,859.00         | 5,041.50         | 4,815.50         | 5,010.00         | 19,726.00         |
| 285                                | 6,873.50         | 6,584.00         | 7,038.50         | 6,579.50         | 27,075.50         |
| 286                                | 6,677.00         | 6,608.00         | 6,325.50         | 6,581.00         | 26,191.50         |
| 287                                | 2,612.50         | 2,896.00         | 2,564.00         | 3,138.00         | 11,210.50         |
| 288                                | 975.00           | 1,177.00         | 1,430.50         | 1,076.50         | 4,659.00          |
| 289                                | 214.50           | 198.00           | 162.00           | 95.50            | 670.00            |
| <b>NC - NORTH CAROLINA - Total</b> | <b>81,066.50</b> | <b>83,766.00</b> | <b>81,859.00</b> | <b>85,142.00</b> | <b>331,833.50</b> |

**STATE: ND - NORTH DAKOTA**

| REGISTRANT ZIP CODE 3 | 1ST QUARTER | 2ND QUARTER | 3RD QUARTER | 4TH QUARTER | TOTAL GRAMS |
|-----------------------|-------------|-------------|-------------|-------------|-------------|
| 580                   | 94.00       | 115.50      | 136.00      | 132.50      | 478.00      |
| 581                   | 22.50       | 21.00       | 42.50       | 58.00       | 144.00      |
| 582                   | 256.50      | 282.00      | 280.00      | 274.50      | 1,093.00    |
| 583                   | 0           | 15.00       | 10.00       | 44.50       | 69.50       |
| 584                   | 41.50       | 41.00       | 32.00       | 24.00       | 138.50      |

|                                  |                 |                 |                 |                 |                 |
|----------------------------------|-----------------|-----------------|-----------------|-----------------|-----------------|
| 585                              | 894.50          | 975.00          | 950.00          | 844.00          | 3,663.50        |
| 586                              | 175.00          | 238.50          | 135.00          | 179.50          | 728.00          |
| 587                              | 241.50          | 150.00          | 187.00          | 195.00          | 773.50          |
| 588                              | 33.00           | 45.00           | 50.00           | 10.00           | 138.00          |
| <b>ND - NORTH DAKOTA - Total</b> | <b>1,758.50</b> | <b>1,883.00</b> | <b>1,822.50</b> | <b>1,762.00</b> | <b>7,226.00</b> |

**STATE: NE - NEBRASKA**

| REGISTRANT ZIP CODE 3        | 1ST QUARTER     | 2ND QUARTER     | 3RD QUARTER     | 4TH QUARTER     | TOTAL GRAMS      |
|------------------------------|-----------------|-----------------|-----------------|-----------------|------------------|
| 680                          | 711.50          | 799.00          | 1,032.50        | 1,011.50        | 3,554.50         |
| 681                          | 4,192.00        | 4,043.50        | 4,446.50        | 4,758.50        | 17,440.50        |
| 683                          | 184.00          | 153.00          | 184.00          | 176.00          | 697.00           |
| 684                          | 190.00          | 214.00          | 228.50          | 221.50          | 854.00           |
| 685                          | 1,493.00        | 1,307.00        | 1,147.00        | 1,394.50        | 5,341.50         |
| 686                          | 359.00          | 423.00          | 541.00          | 395.50          | 1,718.50         |
| 687                          | 288.50          | 342.00          | 293.00          | 322.50          | 1,246.00         |
| 688                          | 973.00          | 1,229.50        | 950.00          | 959.00          | 4,111.50         |
| 689                          | 137.50          | 249.00          | 181.00          | 171.00          | 738.50           |
| 690                          | 52.00           | 42.00           | 70.00           | 78.00           | 242.00           |
| 691                          | 225.00          | 242.00          | 255.50          | 297.00          | 1,019.50         |
| 692                          | 10.00           | 0               | 0               | 5.00            | 15.00            |
| 693                          | 31.00           | 9.00            | 19.00           | 17.00           | 76.00            |
| <b>NE - NEBRASKA - Total</b> | <b>8,846.50</b> | <b>9,053.00</b> | <b>9,348.00</b> | <b>9,807.00</b> | <b>37,054.50</b> |

**STATE: NH - NEW HAMPSHIRE**

| REGISTRANT ZIP CODE 3             | 1ST QUARTER     | 2ND QUARTER     | 3RD QUARTER     | 4TH QUARTER     | TOTAL GRAMS      |
|-----------------------------------|-----------------|-----------------|-----------------|-----------------|------------------|
| 030                               | 1,562.00        | 1,729.00        | 1,463.50        | 1,614.00        | 6,368.50         |
| 031                               | 500.00          | 567.00          | 730.50          | 617.00          | 2,414.50         |
| 032                               | 765.50          | 839.50          | 936.00          | 874.50          | 3,415.50         |
| 033                               | 612.00          | 498.00          | 519.50          | 552.00          | 2,181.50         |
| 034                               | 52.50           | 57.50           | 111.50          | 141.50          | 363.00           |
| 035                               | 337.50          | 342.00          | 377.00          | 296.00          | 1,352.50         |
| 036                               | 6.00            | 0               | 0               | 5.00            | 11.00            |
| 037                               | 105.00          | 71.00           | 116.50          | 94.50           | 387.00           |
| 038                               | 1,836.50        | 1,914.00        | 2,134.00        | 1,913.50        | 7,798.00         |
| <b>NH - NEW HAMPSHIRE - Total</b> | <b>5,777.00</b> | <b>6,018.00</b> | <b>6,388.50</b> | <b>6,108.00</b> | <b>24,291.50</b> |

**STATE: NJ - NEW JERSEY**

| REGISTRANT ZIP CODE 3 | 1ST QUARTER | 2ND QUARTER | 3RD QUARTER | 4TH QUARTER | TOTAL GRAMS |
|-----------------------|-------------|-------------|-------------|-------------|-------------|
| 070                   | 5,441.50    | 5,136.00    | 4,155.00    | 4,546.00    | 19,278.50   |
| 071                   | 467.50      | 439.50      | 414.50      | 361.00      | 1,682.50    |
| 072                   | 341.00      | 233.00      | 176.50      | 253.50      | 1,004.00    |
| 073                   | 215.00      | 258.50      | 352.00      | 272.50      | 1,098.00    |
| 074                   | 1,823.50    | 1,627.50    | 1,712.50    | 1,872.50    | 7,036.00    |

|                                |                  |                  |                  |                  |                   |
|--------------------------------|------------------|------------------|------------------|------------------|-------------------|
| 075                            | 152.00           | 308.00           | 240.50           | 337.00           | 1,037.50          |
| 076                            | 1,997.50         | 2,146.50         | 2,145.00         | 1,890.50         | 8,179.50          |
| 077                            | 3,540.50         | 3,366.50         | 3,248.50         | 3,220.00         | 13,375.50         |
| 078                            | 1,585.00         | 1,664.50         | 1,593.00         | 1,509.50         | 6,352.00          |
| 079                            | 885.00           | 803.00           | 759.00           | 799.50           | 3,246.50          |
| 080                            | 5,820.50         | 6,338.00         | 5,868.50         | 6,145.50         | 24,172.50         |
| 081                            | 395.50           | 279.50           | 276.00           | 342.00           | 1,293.00          |
| 082                            | 1,528.00         | 1,652.50         | 1,521.00         | 1,192.00         | 5,893.50          |
| 083                            | 1,420.00         | 1,306.50         | 1,424.00         | 1,146.50         | 5,297.00          |
| 084                            | 0                | 20.00            | 16.00            | 6.00             | 42.00             |
| 085                            | 1,631.50         | 1,474.50         | 1,271.50         | 1,161.50         | 5,539.00          |
| 086                            | 1,165.00         | 1,098.00         | 836.00           | 963.50           | 4,062.50          |
| 087                            | 2,471.00         | 2,527.50         | 2,140.00         | 2,312.00         | 9,450.50          |
| 088                            | 3,911.50         | 4,004.50         | 3,794.50         | 3,396.00         | 15,106.50         |
| 089                            | 378.00           | 389.00           | 383.00           | 444.50           | 1,594.50          |
| <b>NJ - NEW JERSEY - Total</b> | <b>35,169.50</b> | <b>35,073.00</b> | <b>32,327.00</b> | <b>32,171.50</b> | <b>134,741.00</b> |

**STATE: NM - NEW MEXICO**

| REGISTRANT ZIP CODE 3          | 1ST QUARTER     | 2ND QUARTER     | 3RD QUARTER     | 4TH QUARTER     | TOTAL GRAMS      |
|--------------------------------|-----------------|-----------------|-----------------|-----------------|------------------|
| 870                            | 199.00          | 187.00          | 244.50          | 162.00          | 792.50           |
| 871                            | 1,235.00        | 1,074.50        | 1,070.00        | 1,077.50        | 4,457.00         |
| 873                            | 12.00           | 42.00           | 12.00           | 12.00           | 78.00            |
| 874                            | 161.00          | 163.00          | 87.00           | 112.00          | 523.00           |
| 875                            | 187.00          | 112.00          | 205.50          | 182.50          | 687.00           |
| 877                            | 31.00           | 34.00           | 40.00           | 28.00           | 133.00           |
| 878                            | 42.00           | 26.00           | 40.00           | 60.00           | 168.00           |
| 879                            | 22.50           | 22.50           | 35.00           | 15.00           | 95.00            |
| 880                            | 443.00          | 511.00          | 465.00          | 468.50          | 1,887.50         |
| 881                            | 82.00           | 109.00          | 46.00           | 56.00           | 293.00           |
| 882                            | 323.50          | 194.50          | 169.50          | 137.00          | 824.50           |
| 883                            | 15.00           | 15.00           | 45.00           | 55.00           | 130.00           |
| 884                            | 45.00           | 25.00           | 38.00           | 28.00           | 136.00           |
| <b>NM - NEW MEXICO - Total</b> | <b>2,798.00</b> | <b>2,515.50</b> | <b>2,497.50</b> | <b>2,393.50</b> | <b>10,204.50</b> |

**STATE: NV - NEVADA**

| REGISTRANT ZIP CODE 3 | 1ST QUARTER | 2ND QUARTER | 3RD QUARTER | 4TH QUARTER | TOTAL GRAMS |
|-----------------------|-------------|-------------|-------------|-------------|-------------|
| 890                   | 2,337.50    | 2,152.00    | 2,162.50    | 2,315.50    | 8,967.50    |
| 891                   | 6,208.50    | 5,480.00    | 4,825.00    | 4,563.50    | 21,077.00   |
| 893                   | 18.00       | 9.00        | 0           | 0           | 27.00       |
| 894                   | 454.00      | 455.50      | 438.00      | 521.00      | 1,868.50    |
| 895                   | 543.00      | 436.50      | 402.50      | 567.00      | 1,949.00    |
| 897                   | 181.00      | 167.00      | 138.00      | 78.50       | 564.50      |

|                            |                 |                 |                 |                 |                  |
|----------------------------|-----------------|-----------------|-----------------|-----------------|------------------|
| 898                        | 90.50           | 77.00           | 92.00           | 54.00           | 313.50           |
| <b>NV - NEVADA - Total</b> | <b>9,832.50</b> | <b>8,777.00</b> | <b>8,058.00</b> | <b>8,099.50</b> | <b>34,767.00</b> |

**STATE: NY - NEW YORK**

| REGISTRANT ZIP CODE 3 | 1ST QUARTER | 2ND QUARTER | 3RD QUARTER | 4TH QUARTER | TOTAL GRAMS |
|-----------------------|-------------|-------------|-------------|-------------|-------------|
| 100                   | 2,827.00    | 3,015.00    | 2,843.50    | 2,922.50    | 11,608.00   |
| 101                   | 8.00        | 47.50       | 31.00       | 31.00       | 117.50      |
| 103                   | 1,827.50    | 1,980.00    | 1,713.50    | 2,031.00    | 7,552.00    |
| 104                   | 1,093.50    | 1,124.50    | 1,260.00    | 1,236.00    | 4,714.00    |
| 105                   | 1,301.50    | 1,133.00    | 993.50      | 1,026.50    | 4,454.50    |
| 106                   | 120.50      | 177.50      | 117.50      | 81.50       | 497.00      |
| 107                   | 466.00      | 544.00      | 428.50      | 391.00      | 1,829.50    |
| 108                   | 95.00       | 215.00      | 155.50      | 138.50      | 604.00      |
| 109                   | 1,600.00    | 1,505.50    | 1,268.00    | 1,229.50    | 5,603.00    |
| 110                   | 1,739.50    | 1,475.00    | 1,656.50    | 1,600.00    | 6,471.00    |
| 111                   | 1,087.00    | 1,098.50    | 975.50      | 1,107.50    | 4,268.50    |
| 112                   | 3,105.00    | 3,309.50    | 3,030.50    | 2,981.50    | 12,426.50   |
| 113                   | 2,342.50    | 2,278.00    | 2,090.00    | 2,096.00    | 8,806.50    |
| 114                   | 732.50      | 770.50      | 661.00      | 802.50      | 2,966.50    |
| 115                   | 3,417.50    | 3,961.50    | 3,727.50    | 3,451.00    | 14,557.50   |
| 116                   | 56.50       | 83.50       | 66.00       | 82.00       | 288.00      |
| 117                   | 10,901.00   | 12,388.00   | 11,258.00   | 11,915.00   | 46,462.00   |
| 118                   | 480.50      | 715.50      | 647.50      | 683.50      | 2,527.00    |
| 119                   | 1,211.00    | 1,390.00    | 1,221.50    | 1,400.50    | 5,223.00    |
| 120                   | 519.00      | 556.50      | 527.00      | 443.50      | 2,046.00    |
| 121                   | 280.50      | 278.00      | 303.50      | 276.00      | 1,138.00    |
| 122                   | 1,009.50    | 1,027.00    | 1,078.50    | 868.50      | 3,983.50    |
| 123                   | 152.00      | 258.50      | 190.00      | 244.00      | 844.50      |
| 124                   | 582.00      | 546.00      | 524.50      | 472.00      | 2,124.50    |
| 125                   | 1,577.00    | 1,442.00    | 1,340.50    | 1,460.00    | 5,819.50    |
| 126                   | 118.00      | 118.00      | 192.00      | 195.50      | 623.50      |
| 127                   | 291.00      | 411.00      | 394.50      | 412.50      | 1,509.00    |
| 128                   | 1,191.50    | 1,136.50    | 1,151.00    | 1,196.50    | 4,675.50    |
| 129                   | 730.00      | 558.50      | 579.50      | 795.00      | 2,663.00    |
| 130                   | 4,301.50    | 4,570.00    | 4,267.00    | 4,281.50    | 17,420.00   |
| 131                   | 1,047.00    | 937.50      | 894.50      | 913.00      | 3,792.00    |
| 132                   | 1,730.00    | 1,396.00    | 1,500.00    | 1,570.00    | 6,196.00    |
| 133                   | 1,327.00    | 1,393.00    | 1,423.50    | 1,280.00    | 5,423.50    |
| 134                   | 1,478.50    | 1,357.50    | 1,381.50    | 1,586.50    | 5,804.00    |
| 135                   | 704.50      | 599.50      | 632.50      | 561.00      | 2,497.50    |
| 136                   | 3,110.00    | 2,410.00    | 2,397.50    | 2,446.00    | 10,363.50   |

|                              |                  |                  |                  |                  |                   |
|------------------------------|------------------|------------------|------------------|------------------|-------------------|
| 137                          | 657.50           | 770.50           | 773.00           | 685.00           | 2,886.00          |
| 138                          | 1,266.50         | 1,315.00         | 1,307.00         | 1,287.00         | 5,175.50          |
| 139                          | 944.50           | 1,036.00         | 1,041.50         | 995.00           | 4,017.00          |
| 140                          | 5,087.50         | 4,749.50         | 4,423.50         | 4,015.50         | 18,276.00         |
| 141                          | 2,173.00         | 1,759.50         | 1,604.00         | 1,661.00         | 7,197.50          |
| 142                          | 5,552.50         | 5,268.50         | 4,833.50         | 4,648.50         | 20,303.00         |
| 143                          | 811.00           | 723.50           | 720.50           | 554.00           | 2,809.00          |
| 144                          | 1,638.50         | 1,557.50         | 1,494.00         | 1,439.00         | 6,129.00          |
| 145                          | 1,450.50         | 1,514.00         | 1,503.00         | 1,559.00         | 6,026.50          |
| 146                          | 1,994.00         | 1,800.50         | 1,912.50         | 1,734.50         | 7,441.50          |
| 147                          | 463.00           | 620.50           | 565.00           | 523.50           | 2,172.00          |
| 148                          | 1,650.50         | 1,732.50         | 1,638.00         | 1,588.50         | 6,609.50          |
| 149                          | 195.00           | 168.00           | 159.00           | 146.50           | 668.50            |
| <b>NY - NEW YORK - Total</b> | <b>78,445.00</b> | <b>79,223.00</b> | <b>74,897.00</b> | <b>75,045.50</b> | <b>307,610.50</b> |

**STATE: OH - OHIO**

| REGISTRANT ZIP CODE 3 | 1ST QUARTER | 2ND QUARTER | 3RD QUARTER | 4TH QUARTER | TOTAL GRAMS |
|-----------------------|-------------|-------------|-------------|-------------|-------------|
| 430                   | 2,558.00    | 2,652.50    | 2,585.00    | 2,794.00    | 10,589.50   |
| 431                   | 1,934.00    | 1,774.50    | 1,958.50    | 2,016.00    | 7,683.00    |
| 432                   | 5,687.45    | 4,277.45    | 3,188.83    | 2,742.33    | 15,896.05   |
| 433                   | 496.00      | 582.00      | 502.00      | 475.50      | 2,055.50    |
| 434                   | 895.00      | 856.50      | 791.50      | 739.50      | 3,282.50    |
| 435                   | 2,775.50    | 2,733.00    | 2,497.50    | 2,364.50    | 10,370.50   |
| 436                   | 4,653.50    | 4,097.00    | 3,617.00    | 3,277.00    | 15,644.50   |
| 437                   | 259.00      | 271.00      | 211.00      | 221.00      | 962.00      |
| 438                   | 139.00      | 114.50      | 201.50      | 149.50      | 604.50      |
| 439                   | 988.50      | 888.50      | 847.50      | 706.00      | 3,430.50    |
| 440                   | 4,691.50    | 4,677.00    | 4,120.00    | 4,071.00    | 17,559.50   |
| 441                   | 2,830.50    | 2,929.00    | 2,462.50    | 2,480.00    | 10,702.00   |
| 442                   | 2,300.00    | 2,290.00    | 2,323.50    | 2,284.00    | 9,197.50    |
| 443                   | 592.50      | 628.50      | 748.50      | 709.00      | 2,678.50    |
| 444                   | 1,035.00    | 1,204.00    | 1,095.50    | 972.50      | 4,307.00    |
| 445                   | 791.00      | 803.50      | 701.00      | 675.50      | 2,971.00    |
| 446                   | 2,581.50    | 2,506.00    | 2,417.50    | 2,499.00    | 10,004.00   |
| 447                   | 997.50      | 1,097.50    | 1,300.50    | 1,179.50    | 4,575.00    |
| 448                   | 572.50      | 573.00      | 627.00      | 540.00      | 2,312.50    |
| 449                   | 164.00      | 224.50      | 243.50      | 178.50      | 810.50      |
| 450                   | 2,766.00    | 2,865.50    | 2,858.50    | 2,723.00    | 11,213.00   |
| 451                   | 1,192.00    | 1,157.00    | 1,081.00    | 1,184.50    | 4,614.50    |
| 452                   | 2,457.00    | 2,472.00    | 2,347.50    | 2,623.50    | 9,900.00    |
| 453                   | 1,374.50    | 1,647.50    | 1,449.00    | 1,406.00    | 5,877.00    |



|                          |                  |                  |                  |                  |                   |
|--------------------------|------------------|------------------|------------------|------------------|-------------------|
| 454                      | 1,381.50         | 1,764.00         | 1,657.50         | 1,652.50         | 6,455.50          |
| 455                      | 338.00           | 256.00           | 457.50           | 471.00           | 1,522.50          |
| 456                      | 1,196.00         | 1,270.00         | 1,204.00         | 1,101.50         | 4,771.50          |
| 457                      | 220.50           | 180.00           | 194.00           | 138.50           | 733.00            |
| 458                      | 790.00           | 815.00           | 751.00           | 647.50           | 3,003.50          |
| <b>OH - OHIO - Total</b> | <b>48,657.45</b> | <b>47,606.95</b> | <b>44,439.83</b> | <b>43,022.33</b> | <b>183,726.55</b> |

**STATE: OK - OKLAHOMA**

| REGISTRANT ZIP CODE 3        | 1ST QUARTER      | 2ND QUARTER      | 3RD QUARTER      | 4TH QUARTER      | TOTAL GRAMS      |
|------------------------------|------------------|------------------|------------------|------------------|------------------|
| 730                          | 4,718.00         | 4,522.00         | 3,842.00         | 3,056.50         | 16,138.50        |
| 731                          | 2,718.00         | 3,021.00         | 2,378.00         | 1,811.50         | 9,928.50         |
| 734                          | 985.00           | 888.50           | 736.50           | 492.00           | 3,102.00         |
| 735                          | 900.00           | 712.00           | 642.50           | 500.50           | 2,755.00         |
| 736                          | 194.00           | 167.00           | 104.00           | 144.00           | 609.00           |
| 737                          | 168.50           | 158.50           | 140.00           | 143.50           | 610.50           |
| 738                          | 46.00            | 55.00            | 55.00            | 26.00            | 182.00           |
| 739                          | 20.00            | 15.00            | 32.50            | 6.00             | 73.50            |
| 740                          | 4,364.50         | 3,373.50         | 2,984.00         | 2,208.50         | 12,930.50        |
| 741                          | 3,055.50         | 2,328.50         | 1,877.50         | 1,050.00         | 8,311.50         |
| 743                          | 380.50           | 287.00           | 370.00           | 204.00           | 1,241.50         |
| 744                          | 708.50           | 749.50           | 618.00           | 462.50           | 2,538.50         |
| 745                          | 250.50           | 240.00           | 241.50           | 195.00           | 927.00           |
| 746                          | 123.00           | 187.50           | 91.00            | 43.00            | 444.50           |
| 747                          | 30.00            | 65.50            | 77.00            | 46.00            | 218.50           |
| 748                          | 910.50           | 776.50           | 654.00           | 330.00           | 2,671.00         |
| 749                          | 99.00            | 71.00            | 48.00            | 46.00            | 264.00           |
| <b>OK - OKLAHOMA - Total</b> | <b>19,671.50</b> | <b>17,618.00</b> | <b>14,891.50</b> | <b>10,765.00</b> | <b>62,946.00</b> |

**STATE: OR - OREGON**

| REGISTRANT ZIP CODE 3      | 1ST QUARTER     | 2ND QUARTER     | 3RD QUARTER     | 4TH QUARTER     | TOTAL GRAMS      |
|----------------------------|-----------------|-----------------|-----------------|-----------------|------------------|
| 970                        | 1,554.50        | 1,448.50        | 1,419.00        | 1,357.50        | 5,779.50         |
| 971                        | 278.00          | 245.00          | 277.00          | 188.00          | 988.00           |
| 972                        | 770.00          | 677.00          | 684.50          | 597.50          | 2,729.00         |
| 973                        | 1,161.50        | 1,207.50        | 1,148.50        | 871.50          | 4,389.00         |
| 974                        | 934.50          | 935.50          | 882.50          | 840.00          | 3,592.50         |
| 975                        | 1,281.00        | 1,127.00        | 1,101.50        | 1,058.50        | 4,568.00         |
| 976                        | 191.00          | 210.50          | 110.00          | 97.00           | 608.50           |
| 977                        | 363.00          | 463.00          | 432.00          | 318.00          | 1,576.00         |
| 978                        | 181.50          | 146.00          | 77.00           | 67.00           | 471.50           |
| 979                        | 12.00           | 48.50           | 23.00           | 9.00            | 92.50            |
| <b>OR - OREGON - Total</b> | <b>6,727.00</b> | <b>6,508.50</b> | <b>6,155.00</b> | <b>5,404.00</b> | <b>24,794.50</b> |

**STATE: PA - PENNSYLVANIA**

| REGISTRANT ZIP CODE 3 | 1ST QUARTER | 2ND QUARTER | 3RD QUARTER | 4TH QUARTER | TOTAL GRAMS |
|-----------------------|-------------|-------------|-------------|-------------|-------------|
| 150                   | 842.00      | 1,173.50    | 1,225.50    | 1,176.00    | 4,417.00    |
| 151                   | 692.00      | 771.50      | 538.50      | 623.00      | 2,625.00    |
| 152                   | 508.50      | 637.00      | 534.00      | 645.00      | 2,324.50    |
| 153                   | 638.00      | 553.50      | 379.00      | 401.00      | 1,971.50    |
| 154                   | 123.00      | 114.00      | 188.00      | 115.00      | 540.00      |
| 155                   | 515.50      | 367.00      | 287.50      | 226.50      | 1,396.50    |
| 156                   | 356.50      | 382.00      | 412.00      | 323.50      | 1,474.00    |
| 157                   | 178.50      | 209.00      | 112.50      | 130.00      | 630.00      |
| 158                   | 199.00      | 218.00      | 233.00      | 144.00      | 794.00      |
| 159                   | 779.50      | 515.50      | 461.00      | 424.00      | 2,180.00    |
| 160                   | 276.50      | 268.00      | 312.50      | 256.50      | 1,113.50    |
| 161                   | 659.50      | 482.50      | 567.50      | 621.50      | 2,331.00    |
| 162                   | 302.00      | 301.50      | 307.50      | 356.50      | 1,267.50    |
| 163                   | 416.00      | 492.00      | 509.00      | 512.50      | 1,929.50    |
| 164                   | 240.00      | 165.00      | 183.50      | 234.00      | 822.50      |
| 165                   | 636.50      | 634.00      | 653.50      | 537.00      | 2,461.00    |
| 166                   | 705.50      | 696.00      | 650.00      | 670.00      | 2,721.50    |
| 167                   | 85.00       | 92.50       | 70.00       | 45.00       | 292.50      |
| 168                   | 787.00      | 715.50      | 631.00      | 660.50      | 2,794.00    |
| 169                   | 84.00       | 43.00       | 60.00       | 50.00       | 237.00      |
| 170                   | 3,140.50    | 2,680.00    | 2,092.00    | 2,115.00    | 10,027.50   |
| 171                   | 823.50      | 736.00      | 545.50      | 645.00      | 2,750.00    |
| 172                   | 880.50      | 1,046.00    | 720.00      | 972.00      | 3,618.50    |
| 173                   | 2,604.00    | 2,344.00    | 2,014.50    | 2,143.50    | 9,106.00    |
| 174                   | 1,634.00    | 1,197.00    | 760.00      | 667.50      | 4,258.50    |
| 175                   | 337.50      | 383.50      | 392.50      | 352.50      | 1,466.00    |
| 176                   | 383.00      | 373.00      | 452.00      | 317.50      | 1,525.50    |
| 177                   | 275.00      | 104.00      | 145.00      | 115.00      | 639.00      |
| 178                   | 266.50      | 240.00      | 234.00      | 212.50      | 953.00      |
| 179                   | 363.50      | 408.50      | 372.00      | 318.00      | 1,462.00    |
| 180                   | 5,155.00    | 5,010.00    | 5,003.50    | 4,538.50    | 19,707.00   |
| 181                   | 2,310.00    | 2,204.00    | 2,289.50    | 2,066.50    | 8,870.00    |
| 182                   | 442.00      | 382.00      | 591.00      | 514.00      | 1,929.00    |
| 183                   | 2,558.00    | 2,812.50    | 2,430.00    | 2,490.50    | 10,291.00   |
| 184                   | 1,027.00    | 1,197.00    | 1,012.50    | 1,052.00    | 4,288.50    |
| 185                   | 539.00      | 531.50      | 532.00      | 644.50      | 2,247.00    |
| 186                   | 218.00      | 336.00      | 412.50      | 335.50      | 1,302.00    |
| 187                   | 5,018.00    | 5,629.50    | 5,821.00    | 5,811.50    | 22,280.00   |
| 188                   | 101.00      | 112.00      | 95.00       | 93.50       | 401.50      |

|                                  |                  |                  |                  |                  |                   |
|----------------------------------|------------------|------------------|------------------|------------------|-------------------|
| 189                              | 1,786.50         | 1,619.50         | 1,580.50         | 1,495.00         | 6,481.50          |
| 190                              | 6,555.00         | 6,917.00         | 6,664.00         | 6,811.00         | 26,947.00         |
| 191                              | 1,810.00         | 2,055.50         | 1,641.50         | 1,820.00         | 7,327.00          |
| 193                              | 1,736.00         | 1,587.50         | 1,559.50         | 1,760.50         | 6,643.50          |
| 194                              | 1,938.50         | 1,976.50         | 2,014.50         | 2,020.50         | 7,950.00          |
| 195                              | 1,036.00         | 1,009.50         | 914.00           | 967.00           | 3,926.50          |
| 196                              | 910.00           | 1,069.50         | 937.00           | 964.00           | 3,880.50          |
| <b>PA - PENNSYLVANIA - Total</b> | <b>52,872.50</b> | <b>52,792.50</b> | <b>49,541.00</b> | <b>49,394.50</b> | <b>204,600.50</b> |

**STATE: PR - PUERTO RICO**

| REGISTRANT ZIP CODE 3           | 1ST QUARTER   | 2ND QUARTER   | 3RD QUARTER   | 4TH QUARTER   | TOTAL GRAMS     |
|---------------------------------|---------------|---------------|---------------|---------------|-----------------|
| 006                             | 38.00         | 30.00         | 30.00         | 35.00         | 133.00          |
| 007                             | 90.50         | 70.00         | 20.00         | 25.00         | 205.50          |
| 009                             | 358.50        | 474.50        | 392.00        | 392.50        | 1,617.50        |
| <b>PR - PUERTO RICO - Total</b> | <b>487.00</b> | <b>574.50</b> | <b>442.00</b> | <b>452.50</b> | <b>1,956.00</b> |

**STATE: RI - RHODE ISLAND**

| REGISTRANT ZIP CODE 3            | 1ST QUARTER     | 2ND QUARTER     | 3RD QUARTER     | 4TH QUARTER     | TOTAL GRAMS     |
|----------------------------------|-----------------|-----------------|-----------------|-----------------|-----------------|
| 028                              | 1,120.50        | 1,579.00        | 1,345.00        | 1,292.50        | 5,337.00        |
| 029                              | 607.50          | 584.50          | 470.50          | 569.00          | 2,231.50        |
| <b>RI - RHODE ISLAND - Total</b> | <b>1,728.00</b> | <b>2,163.50</b> | <b>1,815.50</b> | <b>1,861.50</b> | <b>7,568.50</b> |

**STATE: SC - SOUTH CAROLINA**

| REGISTRANT ZIP CODE 3              | 1ST QUARTER      | 2ND QUARTER      | 3RD QUARTER      | 4TH QUARTER      | TOTAL GRAMS       |
|------------------------------------|------------------|------------------|------------------|------------------|-------------------|
| 290                                | 2,325.50         | 2,413.50         | 2,711.00         | 2,696.00         | 10,146.00         |
| 291                                | 2,419.00         | 2,449.00         | 2,519.50         | 2,199.50         | 9,587.00          |
| 292                                | 2,857.00         | 3,199.00         | 3,051.00         | 3,002.00         | 12,109.00         |
| 293                                | 3,252.50         | 3,275.50         | 2,930.50         | 2,804.50         | 12,263.00         |
| 294                                | 3,822.50         | 3,597.00         | 3,461.50         | 3,271.50         | 14,152.50         |
| 295                                | 4,176.50         | 4,057.00         | 3,983.00         | 4,073.50         | 16,290.00         |
| 296                                | 11,426.00        | 12,894.50        | 11,484.00        | 10,746.50        | 46,551.00         |
| 297                                | 2,088.00         | 1,508.50         | 1,451.00         | 1,565.00         | 6,612.50          |
| 298                                | 1,647.00         | 1,834.50         | 1,793.50         | 1,654.50         | 6,929.50          |
| 299                                | 1,670.00         | 1,697.50         | 1,615.50         | 1,607.50         | 6,590.50          |
| <b>SC - SOUTH CAROLINA - Total</b> | <b>35,684.00</b> | <b>36,926.00</b> | <b>35,000.50</b> | <b>33,620.50</b> | <b>141,231.00</b> |

**STATE: SD - SOUTH DAKOTA**

| REGISTRANT ZIP CODE 3 | 1ST QUARTER | 2ND QUARTER | 3RD QUARTER | 4TH QUARTER | TOTAL GRAMS |
|-----------------------|-------------|-------------|-------------|-------------|-------------|
| 570                   | 665.50      | 664.50      | 640.50      | 663.50      | 2,634.00    |
| 571                   | 1,210.00    | 1,161.50    | 930.50      | 1,024.00    | 4,326.00    |
| 572                   | 285.00      | 199.00      | 244.50      | 211.50      | 940.00      |
| 573                   | 293.00      | 302.50      | 247.00      | 261.00      | 1,103.50    |
| 574                   | 602.50      | 539.00      | 456.50      | 534.00      | 2,132.00    |
| 575                   | 60.00       | 70.00       | 110.00      | 107.50      | 347.50      |

|                                  |                 |                 |                 |                 |                  |
|----------------------------------|-----------------|-----------------|-----------------|-----------------|------------------|
| 576                              | 171.50          | 129.00          | 125.00          | 67.00           | <b>492.50</b>    |
| 577                              | 840.00          | 725.00          | 718.00          | 609.50          | <b>2,892.50</b>  |
| <b>SD - SOUTH DAKOTA - Total</b> | <b>4,127.50</b> | <b>3,790.50</b> | <b>3,472.00</b> | <b>3,478.00</b> | <b>14,868.00</b> |

**STATE: TN - TENNESSEE**

| REGISTRANT ZIP CODE 3         | 1ST QUARTER      | 2ND QUARTER      | 3RD QUARTER      | 4TH QUARTER      | TOTAL GRAMS       |
|-------------------------------|------------------|------------------|------------------|------------------|-------------------|
| 370                           | 4,698.00         | 4,990.00         | 4,186.50         | 4,412.50         | <b>18,287.00</b>  |
| 371                           | 4,248.00         | 4,829.00         | 4,391.50         | 4,542.00         | <b>18,010.50</b>  |
| 372                           | 1,770.00         | 2,023.50         | 1,968.00         | 1,635.00         | <b>7,396.50</b>   |
| 373                           | 3,189.00         | 2,979.00         | 2,731.50         | 2,561.50         | <b>11,461.00</b>  |
| 374                           | 1,772.50         | 1,721.50         | 1,363.00         | 1,423.50         | <b>6,280.50</b>   |
| 376                           | 1,710.00         | 2,040.50         | 2,418.50         | 2,378.50         | <b>8,547.50</b>   |
| 377                           | 634.50           | 671.00           | 738.00           | 638.50           | <b>2,682.00</b>   |
| 378                           | 1,411.50         | 1,355.00         | 1,194.00         | 1,192.50         | <b>5,153.00</b>   |
| 379                           | 953.00           | 830.50           | 838.50           | 762.00           | <b>3,384.00</b>   |
| 380                           | 1,165.50         | 1,185.00         | 943.50           | 729.50           | <b>4,023.50</b>   |
| 381                           | 1,256.00         | 1,368.00         | 968.50           | 981.50           | <b>4,574.00</b>   |
| 382                           | 737.50           | 742.50           | 576.00           | 525.00           | <b>2,581.00</b>   |
| 383                           | 1,269.00         | 1,330.00         | 1,429.00         | 1,182.00         | <b>5,210.00</b>   |
| 384                           | 865.50           | 682.50           | 662.00           | 699.50           | <b>2,909.50</b>   |
| 385                           | 779.00           | 798.50           | 715.00           | 678.00           | <b>2,970.50</b>   |
| <b>TN - TENNESSEE - Total</b> | <b>26,459.00</b> | <b>27,546.50</b> | <b>25,123.50</b> | <b>24,341.50</b> | <b>103,470.50</b> |

**STATE: TX - TEXAS**

| REGISTRANT ZIP CODE 3 | 1ST QUARTER | 2ND QUARTER | 3RD QUARTER | 4TH QUARTER | TOTAL GRAMS      |
|-----------------------|-------------|-------------|-------------|-------------|------------------|
| 750                   | 10,695.00   | 10,768.00   | 10,421.50   | 10,133.00   | <b>42,017.50</b> |
| 751                   | 3,211.50    | 2,589.50    | 2,892.50    | 2,891.50    | <b>11,585.00</b> |
| 752                   | 3,212.00    | 2,841.00    | 2,472.00    | 2,884.00    | <b>11,409.00</b> |
| 753                   | 3.00        | 3.00        | 0           | 0           | <b>6.00</b>      |
| 754                   | 839.00      | 952.50      | 838.50      | 795.00      | <b>3,425.00</b>  |
| 755                   | 64.00       | 99.00       | 94.00       | 72.00       | <b>329.00</b>    |
| 756                   | 533.50      | 483.00      | 369.50      | 441.00      | <b>1,827.00</b>  |
| 757                   | 1,071.50    | 1,135.50    | 911.50      | 880.00      | <b>3,998.50</b>  |
| 758                   | 370.50      | 395.00      | 278.00      | 299.50      | <b>1,343.00</b>  |
| 759                   | 294.00      | 279.50      | 264.50      | 209.50      | <b>1,047.50</b>  |
| 760                   | 5,892.50    | 5,299.50    | 4,960.00    | 4,821.00    | <b>20,973.00</b> |
| 761                   | 3,722.00    | 3,227.50    | 3,093.50    | 3,217.00    | <b>13,260.00</b> |
| 762                   | 2,083.00    | 1,978.00    | 1,828.50    | 1,791.00    | <b>7,680.50</b>  |
| 763                   | 892.50      | 983.00      | 1,125.00    | 954.50      | <b>3,955.00</b>  |
| 764                   | 191.00      | 182.00      | 214.00      | 271.00      | <b>858.00</b>    |
| 765                   | 906.00      | 1,018.00    | 1,018.00    | 941.50      | <b>3,883.50</b>  |
| 766                   | 139.00      | 126.00      | 114.00      | 184.00      | <b>563.00</b>    |

|                           |                  |                  |                  |                  |                   |
|---------------------------|------------------|------------------|------------------|------------------|-------------------|
| 767                       | 226.50           | 343.50           | 247.50           | 342.00           | 1,159.50          |
| 768                       | 27.00            | 19.00            | 25.00            | 23.00            | 94.00             |
| 769                       | 306.00           | 223.00           | 266.00           | 345.00           | 1,140.00          |
| 770                       | 3,956.00         | 4,075.00         | 4,023.50         | 3,373.00         | 15,427.50         |
| 773                       | 3,946.00         | 3,504.00         | 3,883.50         | 3,415.00         | 14,748.50         |
| 774                       | 4,014.50         | 4,037.95         | 4,039.00         | 4,010.00         | 16,101.45         |
| 775                       | 4,128.00         | 3,809.00         | 3,512.00         | 3,830.00         | 15,279.00         |
| 776                       | 918.00           | 648.50           | 706.50           | 513.00           | 2,786.00          |
| 777                       | 300.50           | 218.00           | 227.50           | 193.50           | 939.50            |
| 778                       | 534.50           | 534.50           | 527.50           | 272.50           | 1,869.00          |
| 779                       | 112.50           | 98.00            | 176.00           | 207.00           | 593.50            |
| 780                       | 1,459.00         | 1,338.50         | 1,315.50         | 1,171.50         | 5,284.50          |
| 781                       | 1,918.00         | 1,887.50         | 1,441.50         | 1,510.00         | 6,757.00          |
| 782                       | 10,204.50        | 9,668.00         | 9,395.00         | 7,770.50         | 37,038.00         |
| 783                       | 409.00           | 463.00           | 349.00           | 476.00           | 1,697.00          |
| 784                       | 1,089.00         | 1,058.00         | 1,006.00         | 1,013.00         | 4,166.00          |
| 785                       | 404.00           | 326.00           | 400.50           | 392.00           | 1,522.50          |
| 786                       | 3,282.00         | 2,943.50         | 3,014.50         | 2,896.00         | 12,136.00         |
| 787                       | 4,257.50         | 4,096.50         | 3,554.50         | 3,324.00         | 15,232.50         |
| 788                       | 149.00           | 235.50           | 253.00           | 163.00           | 800.50            |
| 789                       | 186.00           | 217.00           | 174.00           | 183.00           | 760.00            |
| 790                       | 299.00           | 370.50           | 287.50           | 354.00           | 1,311.00          |
| 791                       | 1,027.00         | 964.00           | 840.50           | 805.50           | 3,637.00          |
| 792                       | 0                | 0                | 23.00            | 5.00             | 28.00             |
| 793                       | 111.00           | 83.00            | 68.00            | 92.00            | 354.00            |
| 794                       | 1,039.00         | 898.00           | 794.00           | 908.00           | 3,639.00          |
| 795                       | 16.00            | 0                | 6.00             | 16.00            | 38.00             |
| 796                       | 60.00            | 72.00            | 66.00            | 39.50            | 237.50            |
| 797                       | 260.50           | 204.50           | 203.00           | 162.50           | 830.50            |
| 799                       | 2,347.50         | 1,975.50         | 1,791.00         | 1,897.00         | 8,011.00          |
| <b>TX - TEXAS - Total</b> | <b>81,107.50</b> | <b>76,671.45</b> | <b>73,511.50</b> | <b>70,488.00</b> | <b>301,778.45</b> |

## STATE: UT - UTAH

| REGISTRANT ZIP CODE 3 | 1ST QUARTER | 2ND QUARTER | 3RD QUARTER | 4TH QUARTER | TOTAL GRAMS |
|-----------------------|-------------|-------------|-------------|-------------|-------------|
| 840                   | 4,791.00    | 4,532.00    | 4,597.50    | 4,654.00    | 18,574.50   |
| 841                   | 1,425.00    | 1,558.00    | 1,410.50    | 1,359.00    | 5,752.50    |
| 843                   | 513.50      | 490.00      | 427.50      | 357.00      | 1,788.00    |
| 844                   | 887.50      | 794.50      | 838.00      | 754.50      | 3,274.50    |
| 845                   | 654.00      | 669.50      | 625.00      | 844.00      | 2,792.50    |
| 846                   | 965.50      | 1,005.50    | 754.00      | 898.50      | 3,623.50    |
| 847                   | 1,833.00    | 1,446.50    | 1,539.00    | 1,604.00    | 6,422.50    |

|                          |                  |                  |                  |                  |                  |
|--------------------------|------------------|------------------|------------------|------------------|------------------|
| <b>UT - UTAH - Total</b> | <b>11,069.50</b> | <b>10,496.00</b> | <b>10,191.50</b> | <b>10,471.00</b> | <b>42,228.00</b> |
|--------------------------|------------------|------------------|------------------|------------------|------------------|

**STATE: VA - VIRGINIA**

| REGISTRANT ZIP CODE 3        | 1ST QUARTER      | 2ND QUARTER      | 3RD QUARTER      | 4TH QUARTER      | TOTAL GRAMS       |
|------------------------------|------------------|------------------|------------------|------------------|-------------------|
| 201                          | 3,748.50         | 3,713.50         | 3,454.50         | 3,548.00         | 14,464.50         |
| 220                          | 1,647.00         | 1,434.00         | 1,444.50         | 1,477.00         | 6,002.50          |
| 221                          | 1,633.50         | 1,651.50         | 1,467.50         | 1,426.50         | 6,179.00          |
| 222                          | 1,295.00         | 1,080.50         | 985.00           | 960.00           | 4,320.50          |
| 223                          | 985.50           | 1,003.50         | 844.50           | 864.50           | 3,698.00          |
| 224                          | 1,327.00         | 1,246.00         | 1,118.50         | 1,091.00         | 4,782.50          |
| 225                          | 465.50           | 471.50           | 455.50           | 426.00           | 1,818.50          |
| 226                          | 977.00           | 1,116.50         | 944.50           | 892.00           | 3,930.00          |
| 227                          | 140.00           | 140.50           | 141.00           | 215.00           | 636.50            |
| 228                          | 522.50           | 731.00           | 925.50           | 922.50           | 3,101.50          |
| 229                          | 407.50           | 472.50           | 345.00           | 403.00           | 1,628.00          |
| 230                          | 463.00           | 300.00           | 224.50           | 249.00           | 1,236.50          |
| 231                          | 1,303.50         | 1,111.00         | 1,038.50         | 955.00           | 4,408.00          |
| 232                          | 1,541.00         | 1,506.50         | 1,441.50         | 1,248.00         | 5,737.00          |
| 233                          | 2,079.00         | 1,646.50         | 1,667.00         | 1,507.50         | 6,900.00          |
| 234                          | 5,532.50         | 4,923.00         | 4,551.50         | 4,048.00         | 19,055.00         |
| 235                          | 1,050.50         | 1,015.50         | 874.00           | 713.00           | 3,653.00          |
| 236                          | 1,649.00         | 1,466.00         | 1,102.00         | 1,004.50         | 5,221.50          |
| 237                          | 580.50           | 908.00           | 516.00           | 492.00           | 2,496.50          |
| 238                          | 897.50           | 1,006.00         | 952.00           | 1,039.50         | 3,895.00          |
| 239                          | 162.00           | 251.50           | 236.50           | 261.00           | 911.00            |
| 240                          | 917.00           | 1,173.50         | 1,006.50         | 1,214.00         | 4,311.00          |
| 241                          | 954.00           | 1,109.50         | 1,029.50         | 1,138.00         | 4,231.00          |
| 242                          | 729.50           | 830.50           | 930.00           | 907.00           | 3,397.00          |
| 243                          | 1,030.00         | 727.00           | 723.50           | 944.00           | 3,424.50          |
| 244                          | 363.00           | 331.50           | 384.00           | 349.50           | 1,428.00          |
| 245                          | 1,132.00         | 1,226.00         | 1,122.50         | 1,143.50         | 4,624.00          |
| 246                          | 153.00           | 176.00           | 118.00           | 179.50           | 626.50            |
| <b>VA - VIRGINIA - Total</b> | <b>33,686.00</b> | <b>32,769.00</b> | <b>30,043.50</b> | <b>29,618.50</b> | <b>126,117.00</b> |

**STATE: VI - VIRGIN ISLANDS**

| REGISTRANT ZIP CODE 3              | 1ST QUARTER | 2ND QUARTER | 3RD QUARTER | 4TH QUARTER | TOTAL GRAMS |
|------------------------------------|-------------|-------------|-------------|-------------|-------------|
| 008                                | 0           | 0           | 5.00        | 0           | 5.00        |
| <b>VI - VIRGIN ISLANDS - Total</b> | <b>0.00</b> | <b>0.00</b> | <b>5.00</b> | <b>0.00</b> | <b>5.00</b> |

**STATE: VT - VERMONT**

| REGISTRANT ZIP CODE 3 | 1ST QUARTER | 2ND QUARTER | 3RD QUARTER | 4TH QUARTER | TOTAL GRAMS |
|-----------------------|-------------|-------------|-------------|-------------|-------------|
| 050                   | 18.00       | 59.00       | 90.00       | 23.00       | 190.00      |
| 051                   | 0           | 6.00        | 11.00       | 0           | 17.00       |

|                             |               |               |                 |               |                 |
|-----------------------------|---------------|---------------|-----------------|---------------|-----------------|
| 052                         | 141.00        | 174.50        | 184.00          | 164.00        | 663.50          |
| 054                         | 258.00        | 350.50        | 277.50          | 250.50        | 1,136.50        |
| 056                         | 106.00        | 80.00         | 104.00          | 89.00         | 379.00          |
| 057                         | 343.00        | 234.00        | 335.50          | 312.00        | 1,224.50        |
| 058                         | 50.00         | 63.00         | 98.00           | 67.00         | 278.00          |
| <b>VT - VERMONT - Total</b> | <b>916.00</b> | <b>967.00</b> | <b>1,100.00</b> | <b>905.50</b> | <b>3,888.50</b> |

**STATE: WA - WASHINGTON**

| REGISTRANT ZIP CODE 3          | 1ST QUARTER      | 2ND QUARTER      | 3RD QUARTER      | 4TH QUARTER      | TOTAL GRAMS      |
|--------------------------------|------------------|------------------|------------------|------------------|------------------|
| 980                            | 2,394.50         | 2,252.00         | 2,285.00         | 2,128.00         | 9,059.50         |
| 981                            | 852.00           | 942.50           | 929.50           | 1,057.00         | 3,781.00         |
| 982                            | 926.00           | 848.00           | 970.00           | 780.50           | 3,524.50         |
| 983                            | 2,264.50         | 2,183.50         | 2,085.00         | 1,927.50         | 8,460.50         |
| 984                            | 666.50           | 764.00           | 651.50           | 697.50           | 2,779.50         |
| 985                            | 799.00           | 798.50           | 570.00           | 696.50           | 2,864.00         |
| 986                            | 1,092.50         | 1,140.50         | 1,024.50         | 1,444.00         | 4,701.50         |
| 988                            | 497.50           | 460.50           | 491.00           | 393.00           | 1,842.00         |
| 989                            | 440.50           | 335.50           | 269.00           | 347.50           | 1,392.50         |
| 990                            | 304.00           | 403.00           | 415.00           | 573.50           | 1,695.50         |
| 991                            | 202.00           | 199.00           | 156.00           | 102.00           | 659.00           |
| 992                            | 2,865.00         | 2,973.50         | 3,061.00         | 3,118.00         | 12,017.50        |
| 993                            | 1,063.50         | 1,141.00         | 936.50           | 801.50           | 3,942.50         |
| 994                            | 59.50            | 41.00            | 28.00            | 60.50            | 189.00           |
| <b>WA - WASHINGTON - Total</b> | <b>14,427.00</b> | <b>14,482.50</b> | <b>13,872.00</b> | <b>14,127.00</b> | <b>56,908.50</b> |

**STATE: WI - WISCONSIN**

| REGISTRANT ZIP CODE 3 | 1ST QUARTER | 2ND QUARTER | 3RD QUARTER | 4TH QUARTER | TOTAL GRAMS |
|-----------------------|-------------|-------------|-------------|-------------|-------------|
| 530                   | 2,219.50    | 2,091.50    | 2,096.50    | 2,252.50    | 8,660.00    |
| 531                   | 1,949.00    | 1,547.00    | 1,597.00    | 1,543.50    | 6,636.50    |
| 532                   | 1,966.00    | 1,955.00    | 1,548.50    | 1,634.50    | 7,104.00    |
| 534                   | 554.50      | 606.50      | 569.00      | 520.00      | 2,250.00    |
| 535                   | 805.00      | 690.50      | 653.50      | 655.00      | 2,804.00    |
| 537                   | 175.00      | 133.50      | 102.15      | 142.50      | 553.15      |
| 538                   | 44.00       | 38.50       | 29.00       | 9.00        | 120.50      |
| 539                   | 179.00      | 148.50      | 265.00      | 214.00      | 806.50      |
| 540                   | 517.00      | 444.50      | 467.00      | 255.00      | 1,683.50    |
| 541                   | 331.00      | 301.50      | 319.50      | 338.50      | 1,290.50    |
| 542                   | 174.50      | 243.50      | 214.00      | 240.00      | 872.00      |
| 543                   | 376.00      | 441.00      | 514.00      | 477.50      | 1,808.50    |
| 544                   | 737.50      | 613.00      | 676.00      | 646.50      | 2,673.00    |
| 545                   | 279.00      | 234.00      | 127.00      | 134.00      | 774.00      |
| 546                   | 63.00       | 49.00       | 42.00       | 25.00       | 179.00      |

|                               |                  |                  |                  |                  |                  |
|-------------------------------|------------------|------------------|------------------|------------------|------------------|
| 547                           | 205.00           | 332.50           | 209.50           | 207.50           | 954.50           |
| 548                           | 155.00           | 132.00           | 118.00           | 69.00            | 474.00           |
| 549                           | 1,176.50         | 1,215.00         | 1,227.50         | 1,103.00         | 4,722.00         |
| <b>WI - WISCONSIN - Total</b> | <b>11,906.50</b> | <b>11,217.00</b> | <b>10,775.15</b> | <b>10,467.00</b> | <b>44,365.65</b> |

**STATE: WV - WEST VIRGINIA**

| REGISTRANT ZIP CODE 3             | 1ST QUARTER     | 2ND QUARTER     | 3RD QUARTER     | 4TH QUARTER     | TOTAL GRAMS      |
|-----------------------------------|-----------------|-----------------|-----------------|-----------------|------------------|
| 247                               | 202.00          | 110.00          | 112.00          | 93.00           | 517.00           |
| 249                               | 46.00           | 86.00           | 54.00           | 60.00           | 246.00           |
| 250                               | 82.50           | 127.50          | 36.50           | 71.00           | 317.50           |
| 251                               | 65.50           | 50.00           | 45.00           | 125.00          | 285.50           |
| 252                               | 15.00           | 22.50           | 42.00           | 55.50           | 135.00           |
| 253                               | 211.00          | 232.50          | 180.00          | 107.00          | 730.50           |
| 254                               | 1,222.00        | 1,095.00        | 959.00          | 798.50          | 4,074.50         |
| 255                               | 362.00          | 491.00          | 424.50          | 450.00          | 1,727.50         |
| 256                               | 30.00           | 29.00           | 18.00           | 28.00           | 105.00           |
| 257                               | 487.00          | 483.50          | 404.00          | 290.00          | 1,664.50         |
| 258                               | 88.50           | 94.50           | 72.50           | 18.00           | 273.50           |
| 259                               | 22.00           | 17.50           | 10.00           | 5.00            | 54.50            |
| 260                               | 899.50          | 744.50          | 774.00          | 804.00          | 3,222.00         |
| 261                               | 402.00          | 373.50          | 244.00          | 207.00          | 1,226.50         |
| 262                               | 49.00           | 15.00           | 30.00           | 15.00           | 109.00           |
| 263                               | 113.00          | 55.50           | 15.00           | 9.00            | 192.50           |
| 265                               | 243.00          | 252.00          | 182.00          | 172.00          | 849.00           |
| 266                               | 21.00           | 35.50           | 44.50           | 40.50           | 141.50           |
| 267                               | 60.00           | 72.50           | 82.50           | 67.00           | 282.00           |
| 268                               | 77.00           | 32.00           | 54.00           | 57.00           | 220.00           |
| <b>WV - WEST VIRGINIA - Total</b> | <b>4,698.00</b> | <b>4,419.50</b> | <b>3,783.50</b> | <b>3,472.50</b> | <b>16,373.50</b> |

**STATE: WY - WYOMING**

| REGISTRANT ZIP CODE 3 | 1ST QUARTER | 2ND QUARTER | 3RD QUARTER | 4TH QUARTER | TOTAL GRAMS |
|-----------------------|-------------|-------------|-------------|-------------|-------------|
| 820                   | 937.50      | 809.00      | 910.50      | 896.00      | 3,553.00    |
| 822                   | 44.50       | 39.00       | 64.00       | 32.00       | 179.50      |
| 823                   | 15.00       | 35.00       | 37.50       | 0           | 87.50       |
| 824                   | 59.00       | 68.00       | 78.00       | 43.00       | 248.00      |
| 825                   | 0           | 0           | 5.00        | 20.00       | 25.00       |
| 826                   | 263.00      | 175.00      | 195.00      | 113.00      | 746.00      |
| 827                   | 251.50      | 221.00      | 207.00      | 182.50      | 862.00      |
| 828                   | 88.00       | 65.00       | 40.00       | 93.00       | 286.00      |
| 829                   | 111.00      | 95.00       | 81.00       | 102.50      | 389.50      |
| 830                   | 6.00        | 0           | 0           | 0           | 6.00        |
| 831                   | 5.00        | 3.00        | 6.00        | 0           | 14.00       |



|                             |                 |                 |                 |                 |                 |
|-----------------------------|-----------------|-----------------|-----------------|-----------------|-----------------|
| <b>WY - WYOMING - Total</b> | <b>1,780.50</b> | <b>1,510.00</b> | <b>1,624.00</b> | <b>1,482.00</b> | <b>6,396.50</b> |
|-----------------------------|-----------------|-----------------|-----------------|-----------------|-----------------|

**DRUG: 9801 - FENTANYL BASE****STATE: AK - ALASKA**

| REGISTRANT ZIP CODE 3      | 1ST QUARTER   | 2ND QUARTER   | 3RD QUARTER   | 4TH QUARTER   | TOTAL GRAMS   |
|----------------------------|---------------|---------------|---------------|---------------|---------------|
| 995                        | 92.61         | 73.72         | 73.15         | 64.53         | 304.01        |
| 996                        | 87.38         | 78.33         | 71.53         | 52.17         | 289.41        |
| 997                        | 24.30         | 22.74         | 19.71         | 17.61         | 84.36         |
| 998                        | 11.86         | 7.65          | 7.74          | 7.39          | 34.64         |
| 999                        | 8.42          | 7.02          | 4.59          | 4.71          | 24.74         |
| <b>AK - ALASKA - Total</b> | <b>224.57</b> | <b>189.47</b> | <b>176.71</b> | <b>146.41</b> | <b>737.16</b> |

**STATE: AL - ALABAMA**

| REGISTRANT ZIP CODE 3       | 1ST QUARTER     | 2ND QUARTER     | 3RD QUARTER     | 4TH QUARTER     | TOTAL GRAMS     |
|-----------------------------|-----------------|-----------------|-----------------|-----------------|-----------------|
| 350                         | 142.17          | 130.11          | 117.87          | 102.89          | 493.04          |
| 351                         | 81.61           | 77.13           | 68.42           | 60.90           | 288.06          |
| 352                         | 134.90          | 120.22          | 110.32          | 103.03          | 468.47          |
| 354                         | 77.59           | 74.17           | 69.19           | 65.39           | 286.35          |
| 355                         | 52.55           | 48.28           | 48.00           | 39.38           | 188.21          |
| 356                         | 80.91           | 65.20           | 61.89           | 64.28           | 272.28          |
| 357                         | 32.31           | 26.12           | 21.16           | 18.97           | 98.56           |
| 358                         | 60.71           | 57.09           | 50.10           | 43.38           | 211.28          |
| 359                         | 107.78          | 100.62          | 90.63           | 80.44           | 379.48          |
| 360                         | 70.65           | 59.87           | 53.36           | 49.04           | 232.93          |
| 361                         | 71.29           | 64.71           | 63.95           | 58.13           | 258.09          |
| 362                         | 40.76           | 39.76           | 37.33           | 34.04           | 151.90          |
| 363                         | 76.60           | 73.95           | 73.29           | 65.45           | 289.30          |
| 364                         | 31.05           | 27.06           | 25.57           | 23.44           | 107.12          |
| 365                         | 83.37           | 69.32           | 68.48           | 69.33           | 290.49          |
| 366                         | 68.15           | 62.86           | 54.55           | 50.48           | 236.04          |
| 367                         | 22.79           | 20.23           | 20.07           | 23.08           | 86.16           |
| 368                         | 57.71           | 55.28           | 52.85           | 48.38           | 214.21          |
| 369                         | 5.80            | 5.83            | 5.35            | 4.18            | 21.16           |
| <b>AL - ALABAMA - Total</b> | <b>1,298.70</b> | <b>1,177.82</b> | <b>1,092.40</b> | <b>1,004.20</b> | <b>4,573.12</b> |

**STATE: AR - ARKANSAS**

| REGISTRANT ZIP CODE 3 | 1ST QUARTER | 2ND QUARTER | 3RD QUARTER | 4TH QUARTER | TOTAL GRAMS |
|-----------------------|-------------|-------------|-------------|-------------|-------------|
| 716                   | 36.72       | 28.61       | 26.07       | 22.93       | 114.33      |
| 717                   | 27.60       | 24.89       | 23.39       | 22.86       | 98.74       |
| 718                   | 21.51       | 20.00       | 19.70       | 17.01       | 78.21       |
| 719                   | 64.73       | 54.28       | 54.87       | 50.17       | 224.05      |
| 720                   | 86.18       | 74.06       | 63.06       | 56.27       | 279.57      |
| 721                   | 114.22      | 93.88       | 81.03       | 75.95       | 365.08      |

|                              |               |               |               |               |                 |
|------------------------------|---------------|---------------|---------------|---------------|-----------------|
| 722                          | 80.42         | 69.88         | 60.43         | 58.34         | 269.07          |
| 723                          | 21.45         | 18.64         | 16.03         | 14.86         | 70.99           |
| 724                          | 52.73         | 49.53         | 44.30         | 42.68         | 189.24          |
| 725                          | 42.07         | 37.32         | 34.49         | 33.78         | 147.66          |
| 726                          | 35.81         | 30.90         | 30.94         | 26.43         | 124.09          |
| 727                          | 126.86        | 104.20        | 96.46         | 92.61         | 420.13          |
| 728                          | 29.11         | 23.46         | 20.89         | 19.41         | 92.87           |
| 729                          | 43.70         | 41.02         | 41.98         | 40.47         | 167.16          |
| <b>AR - ARKANSAS - Total</b> | <b>783.11</b> | <b>670.68</b> | <b>613.65</b> | <b>573.76</b> | <b>2,641.19</b> |

**STATE: AS - AMERICAN SAMOA**

| REGISTRANT ZIP CODE 3              | 1ST QUARTER | 2ND QUARTER | 3RD QUARTER | 4TH QUARTER | TOTAL GRAMS |
|------------------------------------|-------------|-------------|-------------|-------------|-------------|
| 967                                | 0.01        | 0.05        | 0.26        | 0.05        | 0.37        |
| <b>AS - AMERICAN SAMOA - Total</b> | <b>0.01</b> | <b>0.05</b> | <b>0.26</b> | <b>0.05</b> | <b>0.37</b> |

**STATE: AZ - ARIZONA**

| REGISTRANT ZIP CODE 3       | 1ST QUARTER     | 2ND QUARTER     | 3RD QUARTER     | 4TH QUARTER     | TOTAL GRAMS     |
|-----------------------------|-----------------|-----------------|-----------------|-----------------|-----------------|
| 850                         | 241.13          | 223.95          | 192.21          | 184.40          | 841.70          |
| 851                         | 55.52           | 42.87           | 32.82           | 36.09           | 167.30          |
| 852                         | 500.19          | 413.11          | 419.79          | 309.69          | 1,642.77        |
| 853                         | 244.96          | 207.15          | 180.22          | 180.25          | 812.58          |
| 855                         | 21.17           | 18.40           | 15.12           | 13.71           | 68.39           |
| 856                         | 52.65           | 45.90           | 42.45           | 41.27           | 182.27          |
| 857                         | 228.10          | 205.58          | 186.39          | 191.08          | 811.15          |
| 859                         | 13.08           | 12.59           | 13.96           | 13.45           | 53.07           |
| 860                         | 25.09           | 20.92           | 17.76           | 15.39           | 79.16           |
| 863                         | 51.36           | 49.83           | 48.75           | 41.02           | 190.95          |
| 864                         | 59.79           | 42.78           | 35.61           | 33.62           | 171.79          |
| 865                         | 0.78            | 1.51            | 0.62            | 1.55            | 4.47            |
| <b>AZ - ARIZONA - Total</b> | <b>1,493.82</b> | <b>1,284.59</b> | <b>1,185.69</b> | <b>1,061.51</b> | <b>5,025.61</b> |

**STATE: CA - CALIFORNIA**

| REGISTRANT ZIP CODE 3 | 1ST QUARTER | 2ND QUARTER | 3RD QUARTER | 4TH QUARTER | TOTAL GRAMS |
|-----------------------|-------------|-------------|-------------|-------------|-------------|
| 900                   | 154.28      | 144.35      | 124.45      | 117.39      | 540.47      |
| 902                   | 84.73       | 77.16       | 70.20       | 68.41       | 300.50      |
| 903                   | 4.12        | 5.29        | 4.10        | 4.59        | 18.10       |
| 904                   | 60.19       | 55.85       | 51.74       | 55.63       | 223.40      |
| 905                   | 32.97       | 38.06       | 31.08       | 32.89       | 135.00      |
| 906                   | 74.57       | 70.14       | 69.18       | 63.39       | 277.28      |
| 907                   | 69.21       | 61.86       | 57.24       | 55.08       | 243.40      |
| 908                   | 152.82      | 218.71      | 116.99      | 177.88      | 666.39      |
| 910                   | 46.80       | 48.67       | 43.41       | 41.12       | 180.00      |
| 911                   | 20.69       | 21.39       | 17.10       | 15.91       | 75.09       |

ARCOS 3 - REPORT 01 by GRAMS  
RETAIL DRUG DISTRIBUTION BY ZIP CODE WITHIN STATE

|     |        |        |        |        |          |
|-----|--------|--------|--------|--------|----------|
| 912 | 35.01  | 38.08  | 33.89  | 33.13  | 140.12   |
| 913 | 188.75 | 176.87 | 162.39 | 158.99 | 687.00   |
| 914 | 69.75  | 67.29  | 65.34  | 63.67  | 266.05   |
| 915 | 11.12  | 13.48  | 8.97   | 9.77   | 43.34    |
| 916 | 7.43   | 6.16   | 6.19   | 4.91   | 24.68    |
| 917 | 265.76 | 262.56 | 242.35 | 237.47 | 1,008.14 |
| 918 | 6.56   | 7.06   | 6.78   | 4.45   | 24.85    |
| 919 | 43.80  | 41.55  | 33.95  | 29.32  | 148.61   |
| 920 | 298.09 | 276.46 | 237.69 | 227.27 | 1,039.52 |
| 921 | 328.04 | 249.60 | 261.24 | 225.15 | 1,064.03 |
| 922 | 196.24 | 176.05 | 160.11 | 140.15 | 672.55   |
| 923 | 239.19 | 202.41 | 184.75 | 170.04 | 796.39   |
| 924 | 41.46  | 33.95  | 26.14  | 25.71  | 127.27   |
| 925 | 236.74 | 224.46 | 212.49 | 202.53 | 876.21   |
| 926 | 239.23 | 230.53 | 208.02 | 190.11 | 867.90   |
| 927 | 42.71  | 49.29  | 39.67  | 42.10  | 173.78   |
| 928 | 189.80 | 175.62 | 166.09 | 165.67 | 697.18   |
| 930 | 103.94 | 100.11 | 88.59  | 77.91  | 370.54   |
| 931 | 21.21  | 20.52  | 17.87  | 18.58  | 78.18    |
| 932 | 102.52 | 89.66  | 74.34  | 74.71  | 341.23   |
| 933 | 125.31 | 108.78 | 96.20  | 86.92  | 417.20   |
| 934 | 106.17 | 99.31  | 89.57  | 92.17  | 387.21   |
| 935 | 82.92  | 72.61  | 69.82  | 61.38  | 286.73   |
| 936 | 61.60  | 55.20  | 45.42  | 46.96  | 209.19   |
| 937 | 95.92  | 99.47  | 85.77  | 79.84  | 361.00   |
| 939 | 29.76  | 28.71  | 24.45  | 21.00  | 103.93   |
| 940 | 110.99 | 100.07 | 92.44  | 83.18  | 386.69   |
| 941 | 124.35 | 99.46  | 93.92  | 91.50  | 409.22   |
| 943 | 33.03  | 31.65  | 26.07  | 28.24  | 118.98   |
| 944 | 14.78  | 13.74  | 12.88  | 11.74  | 53.14    |
| 945 | 404.44 | 336.43 | 323.91 | 306.91 | 1,371.69 |
| 946 | 42.27  | 35.74  | 38.16  | 33.41  | 149.58   |
| 947 | 13.90  | 12.78  | 10.22  | 10.06  | 46.95    |
| 948 | 10.85  | 11.71  | 11.50  | 10.80  | 44.86    |
| 949 | 51.85  | 43.80  | 42.63  | 36.29  | 174.56   |
| 950 | 101.30 | 89.73  | 84.23  | 82.85  | 358.10   |
| 951 | 57.92  | 63.23  | 52.77  | 45.59  | 219.52   |
| 952 | 95.88  | 82.99  | 86.95  | 74.95  | 340.77   |
| 953 | 233.12 | 215.23 | 196.71 | 189.21 | 834.26   |
| 954 | 95.85  | 96.27  | 81.53  | 74.99  | 348.64   |

|                                |                 |                 |                 |                 |                  |
|--------------------------------|-----------------|-----------------|-----------------|-----------------|------------------|
| 955                            | 41.06           | 36.50           | 33.85           | 34.23           | 145.64           |
| 956                            | 288.60          | 256.60          | 229.88          | 232.20          | 1,007.28         |
| 957                            | 46.13           | 35.79           | 34.97           | 30.51           | 147.41           |
| 958                            | 183.89          | 161.44          | 147.55          | 137.29          | 630.16           |
| 959                            | 152.99          | 137.82          | 121.28          | 116.33          | 528.43           |
| 960                            | 106.64          | 88.55           | 73.00           | 56.71           | 324.91           |
| 961                            | 16.35           | 13.69           | 12.19           | 10.39           | 52.62            |
| <b>CA - CALIFORNIA - Total</b> | <b>6,095.60</b> | <b>5,610.45</b> | <b>5,040.20</b> | <b>4,819.59</b> | <b>21,565.83</b> |

**STATE: CO - COLORADO**

| REGISTRANT ZIP CODE 3        | 1ST QUARTER     | 2ND QUARTER   | 3RD QUARTER   | 4TH QUARTER   | TOTAL GRAMS     |
|------------------------------|-----------------|---------------|---------------|---------------|-----------------|
| 800                          | 175.51          | 158.86        | 167.25        | 154.07        | 655.69          |
| 801                          | 146.49          | 131.22        | 124.05        | 115.70        | 517.46          |
| 802                          | 191.85          | 154.84        | 139.50        | 128.42        | 614.61          |
| 803                          | 28.18           | 26.50         | 23.09         | 23.09         | 100.85          |
| 804                          | 39.37           | 37.39         | 39.21         | 34.87         | 150.85          |
| 805                          | 123.23          | 108.48        | 111.08        | 93.30         | 436.09          |
| 806                          | 47.41           | 43.25         | 37.80         | 31.96         | 160.41          |
| 807                          | 21.19           | 20.57         | 18.42         | 16.15         | 76.33           |
| 808                          | 27.24           | 22.62         | 20.05         | 19.05         | 88.97           |
| 809                          | 128.24          | 121.07        | 112.88        | 101.60        | 463.78          |
| 810                          | 63.13           | 50.58         | 47.54         | 43.90         | 205.15          |
| 811                          | 10.61           | 12.02         | 10.99         | 10.98         | 44.61           |
| 812                          | 20.18           | 18.76         | 17.26         | 16.64         | 72.85           |
| 813                          | 13.81           | 11.51         | 11.38         | 10.20         | 46.90           |
| 814                          | 12.63           | 9.82          | 9.44          | 8.46          | 40.36           |
| 815                          | 47.78           | 41.00         | 31.70         | 27.29         | 147.77          |
| 816                          | 18.03           | 16.41         | 14.74         | 14.12         | 63.30           |
| <b>CO - COLORADO - Total</b> | <b>1,114.87</b> | <b>984.90</b> | <b>936.41</b> | <b>849.80</b> | <b>3,885.98</b> |

**STATE: CT - CONNECTICUT**

| REGISTRANT ZIP CODE 3 | 1ST QUARTER | 2ND QUARTER | 3RD QUARTER | 4TH QUARTER | TOTAL GRAMS |
|-----------------------|-------------|-------------|-------------|-------------|-------------|
| 060                   | 155.06      | 137.40      | 130.58      | 120.52      | 543.57      |
| 061                   | 42.66       | 33.92       | 35.38       | 33.30       | 145.26      |
| 062                   | 37.13       | 35.76       | 30.52       | 29.37       | 132.77      |
| 063                   | 62.25       | 54.30       | 52.82       | 56.75       | 226.11      |
| 064                   | 216.66      | 191.03      | 206.26      | 189.26      | 803.21      |
| 065                   | 77.60       | 73.29       | 62.65       | 68.14       | 281.69      |
| 066                   | 33.48       | 29.27       | 26.89       | 25.93       | 115.57      |
| 067                   | 77.89       | 70.30       | 67.69       | 65.23       | 281.11      |
| 068                   | 153.79      | 73.85       | 68.07       | 62.83       | 358.54      |
| 069                   | 11.68       | 10.16       | 10.91       | 9.52        | 42.28       |

|                                 |               |               |               |               |                 |
|---------------------------------|---------------|---------------|---------------|---------------|-----------------|
| <b>CT - CONNECTICUT - Total</b> | <b>868.21</b> | <b>709.28</b> | <b>691.77</b> | <b>660.86</b> | <b>2,930.12</b> |
|---------------------------------|---------------|---------------|---------------|---------------|-----------------|

**STATE: DC - DISTRICT OF COLUMBIA**

| REGISTRANT ZIP CODE 3              | 1ST QUARTER  | 2ND QUARTER  | 3RD QUARTER  | 4TH QUARTER  | TOTAL GRAMS   |
|------------------------------------|--------------|--------------|--------------|--------------|---------------|
| 200                                | 73.21        | 69.29        | 65.86        | 63.22        | 271.58        |
| 203                                | 0.04         | 0            | 0            | 0            | 0.04          |
| 204                                | 5.42         | 4.45         | 2.51         | 3.33         | 15.71         |
| <b>DC - DISTRICT OF COLUMBIA -</b> | <b>78.67</b> | <b>73.74</b> | <b>68.38</b> | <b>66.54</b> | <b>287.34</b> |

**STATE: DE - DELAWARE**

| REGISTRANT ZIP CODE 3        | 1ST QUARTER   | 2ND QUARTER   | 3RD QUARTER   | 4TH QUARTER   | TOTAL GRAMS     |
|------------------------------|---------------|---------------|---------------|---------------|-----------------|
| 197                          | 125.03        | 107.72        | 93.20         | 83.33         | 409.28          |
| 198                          | 63.40         | 52.76         | 48.78         | 43.59         | 208.53          |
| 199                          | 125.97        | 99.91         | 88.70         | 75.63         | 390.21          |
| <b>DE - DELAWARE - Total</b> | <b>314.40</b> | <b>260.38</b> | <b>230.68</b> | <b>202.56</b> | <b>1,008.02</b> |

**STATE: FL - FLORIDA**

| REGISTRANT ZIP CODE 3 | 1ST QUARTER | 2ND QUARTER | 3RD QUARTER | 4TH QUARTER | TOTAL GRAMS |
|-----------------------|-------------|-------------|-------------|-------------|-------------|
| 320                   | 191.05      | 173.51      | 150.88      | 135.46      | 650.90      |
| 321                   | 219.23      | 191.76      | 168.04      | 164.38      | 743.41      |
| 322                   | 368.04      | 327.59      | 273.71      | 242.97      | 1,212.32    |
| 323                   | 77.79       | 79.63       | 70.94       | 69.54       | 297.90      |
| 324                   | 115.69      | 105.72      | 97.99       | 86.79       | 406.19      |
| 325                   | 135.02      | 118.89      | 106.65      | 97.35       | 457.91      |
| 326                   | 121.51      | 106.17      | 99.16       | 92.96       | 419.80      |
| 327                   | 297.46      | 269.02      | 234.67      | 223.47      | 1,024.62    |
| 328                   | 146.98      | 148.18      | 121.88      | 126.13      | 543.17      |
| 329                   | 309.56      | 278.37      | 239.78      | 228.00      | 1,055.73    |
| 330                   | 243.52      | 218.90      | 193.19      | 191.32      | 846.93      |
| 331                   | 192.19      | 182.52      | 159.88      | 144.16      | 678.75      |
| 333                   | 217.83      | 191.85      | 171.83      | 169.51      | 751.01      |
| 334                   | 450.62      | 398.90      | 350.14      | 345.80      | 1,545.47    |
| 335                   | 190.26      | 168.99      | 141.68      | 133.53      | 634.46      |
| 336                   | 431.34      | 442.88      | 278.82      | 308.71      | 1,461.77    |
| 337                   | 271.04      | 249.24      | 194.66      | 181.74      | 896.68      |
| 338                   | 161.52      | 119.80      | 101.69      | 100.40      | 483.41      |
| 339                   | 256.09      | 225.85      | 195.75      | 180.25      | 857.94      |
| 341                   | 95.00       | 73.14       | 66.35       | 65.66       | 300.14      |
| 342                   | 296.87      | 247.51      | 209.22      | 205.60      | 959.20      |
| 344                   | 154.70      | 128.52      | 98.95       | 85.40       | 467.58      |
| 346                   | 273.48      | 246.48      | 201.55      | 197.09      | 918.59      |
| 347                   | 125.61      | 107.54      | 90.38       | 92.98       | 416.51      |
| 349                   | 174.65      | 149.47      | 128.45      | 127.19      | 579.76      |

|                             |                 |                 |                 |                 |                  |
|-----------------------------|-----------------|-----------------|-----------------|-----------------|------------------|
| <b>FL - FLORIDA - Total</b> | <b>5,517.05</b> | <b>4,950.45</b> | <b>4,146.25</b> | <b>3,996.39</b> | <b>18,610.14</b> |
|-----------------------------|-----------------|-----------------|-----------------|-----------------|------------------|

**STATE: GA - GEORGIA**

| REGISTRANT ZIP CODE 3       | 1ST QUARTER     | 2ND QUARTER     | 3RD QUARTER     | 4TH QUARTER     | TOTAL GRAMS     |
|-----------------------------|-----------------|-----------------|-----------------|-----------------|-----------------|
| 300                         | 493.12          | 442.75          | 416.94          | 400.58          | 1,753.40        |
| 301                         | 321.11          | 288.00          | 263.69          | 258.04          | 1,130.83        |
| 302                         | 208.79          | 189.57          | 180.07          | 175.95          | 754.39          |
| 303                         | 159.12          | 150.38          | 152.08          | 143.28          | 604.85          |
| 304                         | 67.94           | 57.62           | 49.30           | 52.42           | 227.28          |
| 305                         | 187.90          | 177.72          | 170.56          | 166.48          | 702.67          |
| 306                         | 103.73          | 91.53           | 83.64           | 79.68           | 358.58          |
| 307                         | 53.39           | 45.71           | 40.39           | 39.33           | 178.82          |
| 308                         | 51.28           | 48.95           | 45.69           | 42.49           | 188.42          |
| 309                         | 94.28           | 79.19           | 80.35           | 69.67           | 323.49          |
| 310                         | 170.35          | 159.66          | 142.07          | 136.84          | 608.91          |
| 312                         | 64.03           | 61.81           | 54.22           | 47.17           | 227.22          |
| 313                         | 46.57           | 39.63           | 39.01           | 32.60           | 157.80          |
| 314                         | 57.82           | 57.54           | 53.07           | 44.72           | 213.15          |
| 315                         | 110.93          | 100.47          | 88.02           | 80.73           | 380.15          |
| 316                         | 65.77           | 60.06           | 57.92           | 57.30           | 241.05          |
| 317                         | 116.95          | 111.27          | 101.36          | 96.64           | 426.22          |
| 318                         | 7.41            | 6.31            | 6.47            | 5.42            | 25.60           |
| 319                         | 57.16           | 44.95           | 41.06           | 35.29           | 178.45          |
| 398                         | 29.70           | 26.18           | 26.78           | 25.99           | 108.65          |
| <b>GA - GEORGIA - Total</b> | <b>2,467.35</b> | <b>2,239.30</b> | <b>2,092.68</b> | <b>1,990.60</b> | <b>8,789.93</b> |

**STATE: GU - GUAM**

| REGISTRANT ZIP CODE 3    | 1ST QUARTER | 2ND QUARTER | 3RD QUARTER | 4TH QUARTER | TOTAL GRAMS  |
|--------------------------|-------------|-------------|-------------|-------------|--------------|
| 969                      | 8.96        | 7.20        | 9.21        | 7.39        | 32.77        |
| <b>GU - GUAM - Total</b> | <b>8.96</b> | <b>7.20</b> | <b>9.21</b> | <b>7.39</b> | <b>32.77</b> |

**STATE: HI - HAWAII**

| REGISTRANT ZIP CODE 3      | 1ST QUARTER   | 2ND QUARTER   | 3RD QUARTER   | 4TH QUARTER   | TOTAL GRAMS   |
|----------------------------|---------------|---------------|---------------|---------------|---------------|
| 967                        | 102.14        | 92.21         | 86.75         | 82.79         | 363.88        |
| 968                        | 67.84         | 67.03         | 61.02         | 60.53         | 256.42        |
| <b>HI - HAWAII - Total</b> | <b>169.98</b> | <b>159.24</b> | <b>147.76</b> | <b>143.32</b> | <b>620.30</b> |

**STATE: IA - IOWA**

| REGISTRANT ZIP CODE 3 | 1ST QUARTER | 2ND QUARTER | 3RD QUARTER | 4TH QUARTER | TOTAL GRAMS |
|-----------------------|-------------|-------------|-------------|-------------|-------------|
| 500                   | 63.48       | 58.53       | 55.68       | 57.41       | 235.11      |
| 501                   | 68.79       | 62.03       | 60.30       | 54.63       | 245.75      |
| 502                   | 63.75       | 59.07       | 57.70       | 54.41       | 234.93      |
| 503                   | 90.51       | 78.07       | 74.54       | 72.47       | 315.59      |
| 504                   | 34.38       | 30.84       | 33.41       | 27.92       | 126.55      |

|                          |               |               |               |               |                 |
|--------------------------|---------------|---------------|---------------|---------------|-----------------|
| 505                      | 40.28         | 38.28         | 37.45         | 36.50         | 152.51          |
| 506                      | 42.37         | 41.17         | 42.54         | 42.39         | 168.47          |
| 507                      | 18.76         | 16.69         | 14.63         | 13.44         | 63.52           |
| 508                      | 8.85          | 9.88          | 9.34          | 7.78          | 35.85           |
| 510                      | 11.17         | 10.43         | 9.40          | 9.08          | 40.08           |
| 511                      | 24.16         | 22.11         | 19.19         | 21.03         | 86.49           |
| 512                      | 10.04         | 8.02          | 8.44          | 7.98          | 34.48           |
| 513                      | 11.81         | 10.28         | 10.28         | 9.93          | 42.30           |
| 514                      | 22.09         | 19.56         | 20.01         | 19.30         | 80.96           |
| 515                      | 29.04         | 27.41         | 25.20         | 22.37         | 104.01          |
| 516                      | 6.71          | 7.50          | 6.77          | 7.08          | 28.06           |
| 520                      | 35.99         | 36.52         | 33.00         | 32.97         | 138.48          |
| 521                      | 13.76         | 13.44         | 13.75         | 14.51         | 55.45           |
| 522                      | 28.70         | 31.07         | 31.55         | 30.29         | 121.61          |
| 523                      | 23.27         | 21.53         | 21.63         | 18.50         | 84.94           |
| 524                      | 29.14         | 24.44         | 24.92         | 24.17         | 102.67          |
| 525                      | 40.24         | 35.40         | 32.38         | 31.51         | 139.53          |
| 526                      | 26.77         | 25.57         | 23.85         | 21.84         | 98.03           |
| 527                      | 20.87         | 19.23         | 17.81         | 17.70         | 75.61           |
| 528                      | 30.63         | 29.50         | 27.22         | 25.51         | 112.87          |
| <b>IA - IOWA - Total</b> | <b>795.57</b> | <b>736.56</b> | <b>711.00</b> | <b>680.72</b> | <b>2,923.85</b> |

**STATE: ID - IDAHO**

| REGISTRANT ZIP CODE 3     | 1ST QUARTER   | 2ND QUARTER   | 3RD QUARTER   | 4TH QUARTER   | TOTAL GRAMS     |
|---------------------------|---------------|---------------|---------------|---------------|-----------------|
| 832                       | 58.47         | 51.09         | 51.46         | 51.89         | 212.90          |
| 833                       | 56.16         | 46.57         | 44.54         | 39.24         | 186.51          |
| 834                       | 51.78         | 52.30         | 53.41         | 52.59         | 210.08          |
| 835                       | 40.73         | 39.33         | 36.62         | 36.21         | 152.89          |
| 836                       | 159.33        | 135.82        | 121.00        | 117.57        | 533.72          |
| 837                       | 116.66        | 103.22        | 102.40        | 93.17         | 415.44          |
| 838                       | 77.55         | 68.59         | 66.34         | 59.29         | 271.77          |
| <b>ID - IDAHO - Total</b> | <b>560.67</b> | <b>496.92</b> | <b>475.76</b> | <b>449.96</b> | <b>1,983.31</b> |

**STATE: IL - ILLINOIS**

| REGISTRANT ZIP CODE 3 | 1ST QUARTER | 2ND QUARTER | 3RD QUARTER | 4TH QUARTER | TOTAL GRAMS |
|-----------------------|-------------|-------------|-------------|-------------|-------------|
| 600                   | 394.14      | 350.05      | 335.39      | 306.34      | 1,385.92    |
| 601                   | 243.52      | 207.90      | 202.04      | 191.81      | 845.26      |
| 602                   | 12.03       | 12.11       | 8.71        | 9.48        | 42.33       |
| 603                   | 13.24       | 13.45       | 9.88        | 10.54       | 47.11       |
| 604                   | 309.26      | 273.44      | 255.86      | 247.00      | 1,085.56    |
| 605                   | 188.66      | 156.50      | 151.00      | 138.49      | 634.65      |
| 606                   | 259.22      | 237.73      | 219.49      | 210.90      | 927.33      |

|                              |                 |                 |                 |                 |                 |
|------------------------------|-----------------|-----------------|-----------------|-----------------|-----------------|
| 607                          | 26.45           | 23.22           | 20.96           | 20.90           | 91.52           |
| 608                          | 18.76           | 13.89           | 13.81           | 11.01           | 57.48           |
| 609                          | 41.42           | 36.35           | 31.02           | 30.33           | 139.13          |
| 610                          | 93.79           | 83.88           | 87.49           | 84.41           | 349.57          |
| 611                          | 106.40          | 82.23           | 81.72           | 81.65           | 352.00          |
| 612                          | 28.99           | 23.15           | 23.24           | 23.61           | 99.00           |
| 613                          | 33.54           | 31.12           | 24.41           | 24.36           | 113.43          |
| 614                          | 39.97           | 39.22           | 32.65           | 32.24           | 144.08          |
| 615                          | 61.34           | 57.89           | 49.99           | 47.20           | 216.43          |
| 616                          | 115.69          | 94.29           | 92.42           | 89.23           | 391.63          |
| 617                          | 70.50           | 60.26           | 56.00           | 56.03           | 242.79          |
| 618                          | 70.10           | 56.16           | 52.09           | 51.46           | 229.81          |
| 619                          | 28.68           | 24.50           | 21.93           | 21.65           | 96.76           |
| 620                          | 96.49           | 81.42           | 75.26           | 74.20           | 327.37          |
| 622                          | 93.43           | 75.12           | 68.74           | 64.59           | 301.88          |
| 623                          | 40.83           | 36.93           | 32.04           | 33.60           | 143.40          |
| 624                          | 42.04           | 33.11           | 29.26           | 28.31           | 132.72          |
| 625                          | 77.37           | 63.41           | 63.32           | 63.22           | 267.32          |
| 626                          | 50.08           | 43.55           | 40.63           | 40.45           | 174.71          |
| 627                          | 69.31           | 65.74           | 53.49           | 52.00           | 240.54          |
| 628                          | 48.06           | 43.84           | 39.68           | 36.94           | 168.52          |
| 629                          | 78.42           | 66.27           | 64.08           | 58.12           | 266.89          |
| <b>IL - ILLINOIS - Total</b> | <b>2,751.72</b> | <b>2,386.75</b> | <b>2,236.62</b> | <b>2,140.06</b> | <b>9,515.16</b> |

## STATE: IN - INDIANA

| REGISTRANT ZIP CODE 3 | 1ST QUARTER | 2ND QUARTER | 3RD QUARTER | 4TH QUARTER | TOTAL GRAMS |
|-----------------------|-------------|-------------|-------------|-------------|-------------|
| 460                   | 107.65      | 100.94      | 92.39       | 88.58       | 389.57      |
| 461                   | 119.36      | 112.22      | 119.05      | 114.32      | 464.95      |
| 462                   | 313.76      | 283.90      | 262.82      | 228.10      | 1,088.57    |
| 463                   | 168.93      | 150.27      | 144.49      | 144.04      | 607.73      |
| 464                   | 14.61       | 13.09       | 10.38       | 9.94        | 48.02       |
| 465                   | 125.78      | 110.15      | 98.80       | 94.15       | 428.88      |
| 466                   | 39.88       | 31.81       | 30.70       | 27.82       | 130.21      |
| 467                   | 57.85       | 51.90       | 48.21       | 51.38       | 209.34      |
| 468                   | 99.20       | 86.04       | 83.00       | 81.09       | 349.33      |
| 469                   | 87.34       | 67.64       | 60.80       | 61.80       | 277.58      |
| 470                   | 41.70       | 41.40       | 37.71       | 35.30       | 156.11      |
| 471                   | 81.77       | 69.64       | 65.87       | 64.00       | 281.27      |
| 472                   | 48.96       | 39.31       | 34.86       | 31.47       | 154.60      |
| 473                   | 92.64       | 82.14       | 78.64       | 78.59       | 332.00      |
| 474                   | 56.83       | 53.06       | 50.98       | 50.06       | 210.93      |



|                             |                 |                 |                 |                 |                 |
|-----------------------------|-----------------|-----------------|-----------------|-----------------|-----------------|
| 475                         | 48.35           | 42.06           | 37.80           | 35.16           | <b>163.37</b>   |
| 476                         | 18.03           | 17.77           | 15.18           | 15.40           | <b>66.38</b>    |
| 477                         | 47.98           | 43.35           | 41.32           | 43.57           | <b>176.22</b>   |
| 478                         | 33.85           | 27.57           | 28.06           | 23.67           | <b>113.15</b>   |
| 479                         | 58.67           | 53.88           | 48.27           | 34.97           | <b>195.79</b>   |
| <b>IN - INDIANA - Total</b> | <b>1,663.14</b> | <b>1,478.14</b> | <b>1,389.31</b> | <b>1,313.43</b> | <b>5,844.02</b> |

**STATE: KS - KANSAS**

| REGISTRANT ZIP CODE 3      | 1ST QUARTER   | 2ND QUARTER   | 3RD QUARTER   | 4TH QUARTER   | TOTAL GRAMS     |
|----------------------------|---------------|---------------|---------------|---------------|-----------------|
| 660                        | 134.32        | 124.59        | 121.28        | 112.67        | <b>492.86</b>   |
| 661                        | 51.77         | 36.73         | 34.26         | 31.11         | <b>153.87</b>   |
| 662                        | 139.86        | 131.61        | 119.83        | 128.39        | <b>519.69</b>   |
| 664                        | 24.74         | 19.13         | 22.78         | 19.21         | <b>85.85</b>    |
| 665                        | 39.90         | 39.54         | 33.36         | 35.89         | <b>148.69</b>   |
| 666                        | 56.08         | 54.56         | 50.85         | 47.28         | <b>208.77</b>   |
| 667                        | 57.91         | 55.61         | 50.64         | 52.01         | <b>216.17</b>   |
| 668                        | 10.11         | 8.12          | 7.63          | 6.45          | <b>32.30</b>    |
| 669                        | 16.89         | 18.07         | 15.61         | 15.58         | <b>66.15</b>    |
| 670                        | 52.53         | 48.98         | 43.29         | 43.38         | <b>188.19</b>   |
| 671                        | 29.12         | 26.50         | 24.64         | 22.96         | <b>103.23</b>   |
| 672                        | 119.00        | 106.00        | 98.39         | 91.86         | <b>415.25</b>   |
| 673                        | 22.08         | 17.89         | 16.02         | 15.05         | <b>71.04</b>    |
| 674                        | 65.64         | 57.60         | 57.46         | 57.82         | <b>238.52</b>   |
| 675                        | 29.23         | 26.45         | 28.16         | 30.41         | <b>114.26</b>   |
| 676                        | 31.72         | 29.62         | 27.14         | 28.12         | <b>116.61</b>   |
| 677                        | 17.45         | 18.12         | 14.24         | 16.13         | <b>65.93</b>    |
| 678                        | 45.52         | 41.99         | 40.19         | 39.77         | <b>167.47</b>   |
| 679                        | 16.14         | 12.60         | 12.08         | 11.32         | <b>52.14</b>    |
| <b>KS - KANSAS - Total</b> | <b>960.00</b> | <b>873.71</b> | <b>817.86</b> | <b>805.40</b> | <b>3,456.97</b> |

**STATE: KY - KENTUCKY**

| REGISTRANT ZIP CODE 3 | 1ST QUARTER | 2ND QUARTER | 3RD QUARTER | 4TH QUARTER | TOTAL GRAMS   |
|-----------------------|-------------|-------------|-------------|-------------|---------------|
| 400                   | 38.20       | 33.19       | 34.57       | 33.72       | <b>139.68</b> |
| 401                   | 17.96       | 17.51       | 18.06       | 16.13       | <b>69.66</b>  |
| 402                   | 179.86      | 159.74      | 170.79      | 143.80      | <b>654.20</b> |
| 403                   | 72.56       | 66.05       | 59.91       | 52.59       | <b>251.11</b> |
| 404                   | 37.08       | 34.07       | 31.07       | 27.78       | <b>129.99</b> |
| 405                   | 78.76       | 72.25       | 56.92       | 61.15       | <b>269.07</b> |
| 406                   | 6.73        | 7.67        | 6.11        | 5.99        | <b>26.50</b>  |
| 407                   | 32.39       | 28.93       | 29.17       | 25.87       | <b>116.36</b> |
| 408                   | 6.47        | 7.17        | 5.20        | 5.75        | <b>24.59</b>  |
| 409                   | 12.58       | 10.67       | 10.44       | 8.50        | <b>42.20</b>  |

|                              |                 |               |               |               |                 |
|------------------------------|-----------------|---------------|---------------|---------------|-----------------|
| 410                          | 128.79          | 116.49        | 104.94        | 92.12         | 442.33          |
| 411                          | 28.86           | 26.85         | 23.01         | 23.00         | 101.72          |
| 412                          | 11.83           | 10.88         | 9.05          | 9.29          | 41.05           |
| 413                          | 7.71            | 7.56          | 7.28          | 6.19          | 28.74           |
| 414                          | 2.29            | 2.02          | 2.23          | 2.09          | 8.62            |
| 415                          | 13.03           | 11.41         | 9.60          | 9.52          | 43.56           |
| 416                          | 10.84           | 11.41         | 10.32         | 10.11         | 42.67           |
| 417                          | 25.89           | 32.95         | 26.94         | 24.91         | 110.69          |
| 418                          | 3.00            | 2.89          | 2.24          | 2.29          | 10.42           |
| 420                          | 53.80           | 45.37         | 44.07         | 37.58         | 180.82          |
| 421                          | 59.80           | 54.78         | 50.31         | 42.53         | 207.42          |
| 422                          | 25.86           | 20.29         | 22.38         | 16.19         | 84.72           |
| 423                          | 33.18           | 31.90         | 29.21         | 25.03         | 119.32          |
| 424                          | 37.86           | 35.96         | 29.82         | 28.23         | 131.87          |
| 425                          | 19.97           | 18.17         | 18.26         | 15.24         | 71.63           |
| 426                          | 14.94           | 13.00         | 9.56          | 11.97         | 49.47           |
| 427                          | 44.36           | 41.47         | 36.52         | 36.92         | 159.27          |
| <b>KY - KENTUCKY - Total</b> | <b>1,004.59</b> | <b>920.63</b> | <b>857.97</b> | <b>774.49</b> | <b>3,557.68</b> |

**STATE: LA - LOUISIANA**

| REGISTRANT ZIP CODE 3         | 1ST QUARTER     | 2ND QUARTER   | 3RD QUARTER   | 4TH QUARTER   | TOTAL GRAMS     |
|-------------------------------|-----------------|---------------|---------------|---------------|-----------------|
| 700                           | 87.90           | 74.79         | 71.22         | 72.68         | 306.58          |
| 701                           | 58.57           | 56.00         | 51.25         | 44.99         | 210.81          |
| 703                           | 66.63           | 56.05         | 45.47         | 44.97         | 213.11          |
| 704                           | 99.98           | 86.76         | 81.33         | 78.31         | 346.38          |
| 705                           | 163.23          | 167.34        | 154.93        | 139.03        | 624.53          |
| 706                           | 42.01           | 34.74         | 31.19         | 33.81         | 141.76          |
| 707                           | 92.47           | 90.29         | 87.44         | 81.31         | 351.50          |
| 708                           | 93.30           | 75.46         | 67.15         | 64.09         | 300.00          |
| 710                           | 31.81           | 27.21         | 29.37         | 24.32         | 112.71          |
| 711                           | 75.47           | 69.11         | 67.07         | 66.09         | 277.74          |
| 712                           | 93.53           | 83.19         | 82.43         | 82.85         | 341.99          |
| 713                           | 75.49           | 65.81         | 59.97         | 57.65         | 258.92          |
| 714                           | 34.19           | 28.99         | 26.74         | 27.57         | 117.49          |
| <b>LA - LOUISIANA - Total</b> | <b>1,014.57</b> | <b>915.75</b> | <b>855.53</b> | <b>817.67</b> | <b>3,603.52</b> |

**STATE: MA - MASSACHUSETTS**

| REGISTRANT ZIP CODE 3 | 1ST QUARTER | 2ND QUARTER | 3RD QUARTER | 4TH QUARTER | TOTAL GRAMS |
|-----------------------|-------------|-------------|-------------|-------------|-------------|
| 010                   | 132.69      | 116.81      | 107.35      | 105.95      | 462.78      |
| 011                   | 38.55       | 30.47       | 30.19       | 28.97       | 128.18      |
| 012                   | 23.15       | 22.98       | 22.02       | 21.43       | 89.59       |
| 013                   | 16.51       | 13.39       | 11.63       | 12.06       | 53.59       |

|                                   |                 |                 |                 |               |                 |
|-----------------------------------|-----------------|-----------------|-----------------|---------------|-----------------|
| 014                               | 34.41           | 30.17           | 27.95           | 27.97         | 120.50          |
| 015                               | 51.12           | 50.82           | 43.65           | 45.68         | 191.27          |
| 016                               | 42.85           | 37.42           | 32.51           | 36.96         | 149.74          |
| 017                               | 53.21           | 51.47           | 48.73           | 52.79         | 206.20          |
| 018                               | 163.66          | 159.88          | 141.42          | 135.02        | 599.99          |
| 019                               | 81.68           | 71.60           | 71.81           | 65.89         | 290.97          |
| 020                               | 47.60           | 54.65           | 39.20           | 40.46         | 181.90          |
| 021                               | 162.62          | 152.02          | 137.81          | 133.33        | 585.79          |
| 022                               | 19.60           | 22.32           | 19.18           | 20.73         | 81.83           |
| 023                               | 81.64           | 78.04           | 71.18           | 71.22         | 302.07          |
| 024                               | 34.66           | 33.35           | 32.09           | 31.44         | 131.54          |
| 025                               | 20.91           | 23.37           | 21.14           | 19.36         | 84.78           |
| 026                               | 22.89           | 18.20           | 19.74           | 19.20         | 80.03           |
| 027                               | 146.60          | 136.69          | 126.05          | 125.06        | 534.40          |
| <b>MA - MASSACHUSETTS - Total</b> | <b>1,174.34</b> | <b>1,103.65</b> | <b>1,003.65</b> | <b>993.50</b> | <b>4,275.14</b> |

**STATE: MD - MARYLAND**

| REGISTRANT ZIP CODE 3        | 1ST QUARTER     | 2ND QUARTER     | 3RD QUARTER   | 4TH QUARTER   | TOTAL GRAMS     |
|------------------------------|-----------------|-----------------|---------------|---------------|-----------------|
| 206                          | 74.43           | 71.43           | 60.53         | 59.49         | 265.89          |
| 207                          | 91.10           | 93.29           | 85.11         | 67.26         | 336.75          |
| 208                          | 135.35          | 122.85          | 107.42        | 93.15         | 458.77          |
| 209                          | 33.14           | 31.06           | 26.33         | 24.91         | 115.44          |
| 210                          | 175.92          | 153.34          | 140.64        | 137.11        | 607.01          |
| 211                          | 89.01           | 70.92           | 70.42         | 66.86         | 297.21          |
| 212                          | 256.60          | 234.22          | 210.08        | 206.96        | 907.86          |
| 214                          | 22.66           | 21.95           | 18.12         | 19.03         | 81.77           |
| 215                          | 35.46           | 25.90           | 24.13         | 19.65         | 105.14          |
| 216                          | 37.89           | 31.45           | 27.01         | 26.39         | 122.74          |
| 217                          | 153.21          | 133.65          | 128.08        | 122.68        | 537.61          |
| 218                          | 42.25           | 34.39           | 35.13         | 31.39         | 143.15          |
| 219                          | 30.17           | 23.37           | 21.78         | 16.07         | 91.39           |
| <b>MD - MARYLAND - Total</b> | <b>1,177.18</b> | <b>1,047.83</b> | <b>954.78</b> | <b>890.95</b> | <b>4,070.73</b> |

**STATE: ME - MAINE**

| REGISTRANT ZIP CODE 3 | 1ST QUARTER | 2ND QUARTER | 3RD QUARTER | 4TH QUARTER | TOTAL GRAMS |
|-----------------------|-------------|-------------|-------------|-------------|-------------|
| 039                   | 2.58        | 2.02        | 3.05        | 3.43        | 11.08       |
| 040                   | 73.52       | 66.63       | 67.61       | 68.62       | 276.38      |
| 041                   | 36.64       | 29.68       | 30.92       | 31.08       | 128.32      |
| 042                   | 31.12       | 31.01       | 29.10       | 31.53       | 122.76      |
| 043                   | 42.42       | 33.58       | 35.21       | 30.14       | 141.35      |
| 044                   | 35.61       | 31.44       | 28.49       | 27.67       | 123.21      |
| 045                   | 6.54        | 5.98        | 6.43        | 6.14        | 25.08       |

|                           |               |               |               |               |                 |
|---------------------------|---------------|---------------|---------------|---------------|-----------------|
| 046                       | 12.28         | 11.26         | 11.90         | 11.37         | 46.80           |
| 047                       | 18.31         | 16.77         | 16.11         | 14.47         | 65.65           |
| 048                       | 8.02          | 8.86          | 7.61          | 4.81          | 29.30           |
| 049                       | 36.63         | 36.37         | 30.01         | 28.79         | 131.80          |
| <b>ME - MAINE - Total</b> | <b>303.68</b> | <b>273.58</b> | <b>266.44</b> | <b>258.04</b> | <b>1,101.74</b> |

**STATE: MI - MICHIGAN**

| REGISTRANT ZIP CODE 3        | 1ST QUARTER     | 2ND QUARTER     | 3RD QUARTER     | 4TH QUARTER     | TOTAL GRAMS     |
|------------------------------|-----------------|-----------------|-----------------|-----------------|-----------------|
| 480                          | 292.01          | 255.91          | 243.99          | 221.66          | 1,013.58        |
| 481                          | 381.94          | 343.78          | 301.85          | 278.19          | 1,305.76        |
| 482                          | 76.00           | 74.92           | 65.13           | 63.76           | 279.81          |
| 483                          | 241.53          | 228.40          | 206.06          | 190.00          | 866.00          |
| 484                          | 108.20          | 95.01           | 90.16           | 81.00           | 374.38          |
| 485                          | 61.42           | 55.18           | 49.09           | 46.72           | 212.41          |
| 486                          | 178.00          | 166.50          | 154.10          | 144.72          | 643.32          |
| 487                          | 80.97           | 69.77           | 66.70           | 66.88           | 284.33          |
| 488                          | 138.07          | 123.19          | 109.81          | 106.28          | 477.35          |
| 489                          | 54.05           | 45.05           | 44.38           | 38.50           | 181.98          |
| 490                          | 282.40          | 264.65          | 246.76          | 228.10          | 1,021.91        |
| 491                          | 30.07           | 26.65           | 25.11           | 25.07           | 106.90          |
| 492                          | 89.51           | 77.94           | 69.04           | 66.25           | 302.73          |
| 493                          | 53.09           | 45.03           | 41.81           | 39.72           | 179.65          |
| 494                          | 154.52          | 137.13          | 130.86          | 120.18          | 542.69          |
| 495                          | 171.90          | 143.18          | 126.51          | 119.00          | 560.60          |
| 496                          | 125.22          | 111.16          | 102.99          | 93.37           | 432.75          |
| 497                          | 88.43           | 71.16           | 70.89           | 63.07           | 293.54          |
| 498                          | 70.13           | 59.79           | 59.64           | 56.02           | 245.58          |
| 499                          | 22.81           | 19.83           | 19.38           | 18.67           | 80.70           |
| <b>MI - MICHIGAN - Total</b> | <b>2,700.25</b> | <b>2,414.26</b> | <b>2,224.25</b> | <b>2,067.19</b> | <b>9,405.95</b> |

**STATE: MN - MINNESOTA**

| REGISTRANT ZIP CODE 3 | 1ST QUARTER | 2ND QUARTER | 3RD QUARTER | 4TH QUARTER | TOTAL GRAMS |
|-----------------------|-------------|-------------|-------------|-------------|-------------|
| 550                   | 97.86       | 78.33       | 74.36       | 79.25       | 329.80      |
| 551                   | 127.19      | 118.59      | 107.81      | 103.87      | 457.46      |
| 553                   | 118.49      | 102.86      | 98.04       | 95.31       | 414.71      |
| 554                   | 201.50      | 152.91      | 198.13      | 159.48      | 712.01      |
| 556                   | 2.53        | 2.57        | 2.30        | 1.97        | 9.36        |
| 557                   | 34.66       | 31.59       | 29.05       | 27.04       | 122.35      |
| 558                   | 25.85       | 22.00       | 20.61       | 18.84       | 87.29       |
| 559                   | 55.51       | 47.09       | 47.70       | 44.80       | 195.09      |
| 560                   | 40.13       | 34.33       | 31.08       | 32.18       | 137.73      |
| 561                   | 19.64       | 17.49       | 17.57       | 15.49       | 70.19       |

|                               |               |               |               |               |                 |
|-------------------------------|---------------|---------------|---------------|---------------|-----------------|
| 562                           | 31.22         | 26.93         | 24.60         | 24.09         | 106.84          |
| 563                           | 64.90         | 60.58         | 47.24         | 47.92         | 220.64          |
| 564                           | 28.39         | 27.46         | 24.83         | 22.45         | 103.13          |
| 565                           | 32.71         | 28.86         | 25.37         | 23.61         | 110.55          |
| 566                           | 14.74         | 13.36         | 12.96         | 10.18         | 51.25           |
| 567                           | 27.55         | 23.06         | 22.15         | 21.81         | 94.58           |
| <b>MN - MINNESOTA - Total</b> | <b>922.88</b> | <b>788.02</b> | <b>783.81</b> | <b>728.27</b> | <b>3,222.99</b> |

**STATE: MO - MISSOURI**

| REGISTRANT ZIP CODE 3        | 1ST QUARTER     | 2ND QUARTER     | 3RD QUARTER     | 4TH QUARTER     | TOTAL GRAMS     |
|------------------------------|-----------------|-----------------|-----------------|-----------------|-----------------|
| 630                          | 189.22          | 163.87          | 145.72          | 132.20          | 631.01          |
| 631                          | 300.28          | 280.50          | 294.90          | 283.12          | 1,158.80        |
| 633                          | 105.25          | 86.08           | 77.53           | 69.83           | 338.69          |
| 634                          | 26.35           | 25.00           | 23.34           | 24.95           | 99.65           |
| 635                          | 28.38           | 26.70           | 23.85           | 22.95           | 101.88          |
| 636                          | 49.58           | 42.04           | 39.41           | 35.71           | 166.73          |
| 637                          | 32.31           | 26.64           | 24.21           | 22.45           | 105.60          |
| 638                          | 36.45           | 29.58           | 28.76           | 30.07           | 124.85          |
| 639                          | 15.22           | 12.99           | 11.86           | 11.51           | 51.58           |
| 640                          | 184.41          | 171.46          | 158.45          | 155.31          | 669.63          |
| 641                          | 148.93          | 140.81          | 125.43          | 122.14          | 537.32          |
| 644                          | 27.91           | 24.83           | 24.43           | 21.16           | 98.34           |
| 645                          | 40.78           | 35.25           | 29.04           | 26.81           | 131.88          |
| 646                          | 28.29           | 23.47           | 18.32           | 16.07           | 86.15           |
| 647                          | 49.11           | 40.58           | 43.37           | 38.93           | 171.99          |
| 648                          | 71.01           | 67.07           | 62.97           | 63.06           | 264.11          |
| 650                          | 43.23           | 39.47           | 37.00           | 31.26           | 150.96          |
| 651                          | 24.74           | 22.81           | 22.65           | 21.55           | 91.74           |
| 652                          | 79.80           | 75.50           | 65.14           | 65.13           | 285.57          |
| 653                          | 29.62           | 27.21           | 25.12           | 24.28           | 106.22          |
| 654                          | 32.18           | 30.56           | 23.69           | 22.63           | 109.06          |
| 655                          | 36.50           | 30.42           | 28.10           | 27.36           | 122.38          |
| 656                          | 76.46           | 68.79           | 64.12           | 67.57           | 276.94          |
| 657                          | 115.56          | 106.06          | 105.98          | 100.58          | 428.17          |
| 658                          | 138.35          | 121.14          | 108.90          | 97.99           | 466.38          |
| <b>MO - MISSOURI - Total</b> | <b>1,909.91</b> | <b>1,718.82</b> | <b>1,612.29</b> | <b>1,534.63</b> | <b>6,775.65</b> |

**STATE: MS - MISSISSIPPI**

| REGISTRANT ZIP CODE 3 | 1ST QUARTER | 2ND QUARTER | 3RD QUARTER | 4TH QUARTER | TOTAL GRAMS |
|-----------------------|-------------|-------------|-------------|-------------|-------------|
| 386                   | 98.04       | 84.98       | 83.01       | 75.78       | 341.80      |
| 387                   | 22.21       | 19.40       | 16.50       | 17.40       | 75.50       |
| 388                   | 95.93       | 86.99       | 79.13       | 75.15       | 337.19      |

|                                 |                 |               |                 |               |                 |
|---------------------------------|-----------------|---------------|-----------------|---------------|-----------------|
| 389                             | 24.14           | 21.70         | 19.64           | 20.39         | 85.86           |
| 390                             | 65.26           | 54.02         | 55.65           | 48.71         | 223.65          |
| 391                             | 289.50          | 272.24        | 403.91          | 260.05        | 1,225.71        |
| 392                             | 85.98           | 79.48         | 78.45           | 70.31         | 314.22          |
| 393                             | 75.17           | 60.10         | 54.56           | 51.02         | 240.85          |
| 394                             | 132.50          | 115.27        | 102.82          | 97.85         | 448.44          |
| 395                             | 91.42           | 78.42         | 74.93           | 69.42         | 314.19          |
| 396                             | 48.04           | 38.36         | 34.74           | 35.21         | 156.35          |
| 397                             | 32.32           | 29.93         | 26.37           | 27.34         | 115.96          |
| <b>MS - MISSISSIPPI - Total</b> | <b>1,060.52</b> | <b>940.87</b> | <b>1,029.70</b> | <b>848.63</b> | <b>3,879.72</b> |

**STATE: MT - MONTANA**

| REGISTRANT ZIP CODE 3       | 1ST QUARTER   | 2ND QUARTER   | 3RD QUARTER   | 4TH QUARTER   | TOTAL GRAMS     |
|-----------------------------|---------------|---------------|---------------|---------------|-----------------|
| 590                         | 15.83         | 13.10         | 11.79         | 12.87         | 53.59           |
| 591                         | 59.78         | 52.56         | 50.90         | 49.51         | 212.75          |
| 592                         | 11.71         | 10.85         | 11.19         | 9.64          | 43.40           |
| 593                         | 12.70         | 12.00         | 10.89         | 9.86          | 45.45           |
| 594                         | 38.84         | 37.74         | 34.89         | 34.37         | 145.83          |
| 595                         | 9.68          | 10.55         | 9.75          | 7.67          | 37.64           |
| 596                         | 24.71         | 25.16         | 23.04         | 22.78         | 95.69           |
| 597                         | 32.07         | 28.33         | 25.63         | 26.42         | 112.45          |
| 598                         | 50.70         | 54.55         | 47.82         | 42.25         | 195.32          |
| 599                         | 35.91         | 28.98         | 27.44         | 26.18         | 118.50          |
| <b>MT - MONTANA - Total</b> | <b>291.92</b> | <b>273.83</b> | <b>253.34</b> | <b>241.54</b> | <b>1,060.63</b> |

**STATE: NC - NORTH CAROLINA**

| REGISTRANT ZIP CODE 3 | 1ST QUARTER | 2ND QUARTER | 3RD QUARTER | 4TH QUARTER | TOTAL GRAMS |
|-----------------------|-------------|-------------|-------------|-------------|-------------|
| 270                   | 62.05       | 53.36       | 44.45       | 43.31       | 203.18      |
| 271                   | 82.22       | 83.48       | 69.56       | 56.11       | 291.37      |
| 272                   | 153.06      | 127.49      | 125.09      | 121.97      | 527.62      |
| 273                   | 86.10       | 76.21       | 71.36       | 74.30       | 307.97      |
| 274                   | 49.25       | 45.57       | 40.32       | 41.81       | 176.95      |
| 275                   | 237.21      | 219.06      | 207.33      | 198.62      | 862.21      |
| 276                   | 101.14      | 106.67      | 100.36      | 100.46      | 408.63      |
| 277                   | 81.40       | 60.32       | 63.04       | 55.75       | 260.51      |
| 278                   | 164.61      | 150.20      | 147.16      | 143.07      | 605.04      |
| 279                   | 56.75       | 49.64       | 49.81       | 51.69       | 207.88      |
| 280                   | 181.92      | 166.04      | 160.45      | 159.64      | 668.06      |
| 281                   | 144.33      | 124.57      | 117.25      | 117.21      | 503.37      |
| 282                   | 125.33      | 106.40      | 98.41       | 89.47       | 419.61      |
| 283                   | 176.65      | 156.15      | 156.42      | 146.85      | 636.07      |
| 284                   | 154.41      | 134.30      | 127.79      | 122.51      | 539.01      |

|                                    |                 |                 |                 |                 |                 |
|------------------------------------|-----------------|-----------------|-----------------|-----------------|-----------------|
| 285                                | 167.15          | 139.15          | 137.72          | 130.41          | 574.44          |
| 286                                | 225.50          | 212.72          | 195.75          | 193.16          | 827.13          |
| 287                                | 118.47          | 110.82          | 102.76          | 97.48           | 429.53          |
| 288                                | 57.18           | 51.83           | 45.27           | 43.48           | 197.76          |
| 289                                | 16.79           | 13.07           | 13.89           | 11.90           | 55.65           |
| <b>NC - NORTH CAROLINA - Total</b> | <b>2,441.52</b> | <b>2,187.04</b> | <b>2,074.21</b> | <b>1,999.21</b> | <b>8,701.98</b> |

**STATE: ND - NORTH DAKOTA**

| REGISTRANT ZIP CODE 3            | 1ST QUARTER   | 2ND QUARTER   | 3RD QUARTER   | 4TH QUARTER   | TOTAL GRAMS   |
|----------------------------------|---------------|---------------|---------------|---------------|---------------|
| 580                              | 11.49         | 8.98          | 8.20          | 7.64          | 36.32         |
| 581                              | 34.37         | 38.13         | 27.35         | 27.46         | 127.31        |
| 582                              | 34.04         | 30.24         | 30.94         | 27.98         | 123.21        |
| 583                              | 16.82         | 17.23         | 16.80         | 14.77         | 65.62         |
| 584                              | 13.72         | 13.98         | 12.39         | 10.18         | 50.28         |
| 585                              | 51.08         | 50.01         | 48.81         | 45.32         | 195.22        |
| 586                              | 14.70         | 11.20         | 12.02         | 11.09         | 49.01         |
| 587                              | 15.39         | 14.51         | 13.41         | 11.65         | 54.96         |
| 588                              | 9.31          | 8.94          | 10.19         | 9.39          | 37.82         |
| <b>ND - NORTH DAKOTA - Total</b> | <b>200.92</b> | <b>193.22</b> | <b>180.11</b> | <b>165.49</b> | <b>739.73</b> |

**STATE: NE - NEBRASKA**

| REGISTRANT ZIP CODE 3        | 1ST QUARTER   | 2ND QUARTER   | 3RD QUARTER   | 4TH QUARTER   | TOTAL GRAMS     |
|------------------------------|---------------|---------------|---------------|---------------|-----------------|
| 680                          | 61.22         | 49.34         | 52.04         | 53.37         | 215.97          |
| 681                          | 121.75        | 122.35        | 98.58         | 99.93         | 442.61          |
| 683                          | 22.65         | 21.29         | 18.82         | 19.49         | 82.24           |
| 684                          | 16.67         | 14.45         | 16.51         | 13.83         | 61.46           |
| 685                          | 49.60         | 48.28         | 47.26         | 43.47         | 188.61          |
| 686                          | 12.88         | 13.40         | 11.63         | 11.75         | 49.66           |
| 687                          | 32.41         | 30.44         | 29.70         | 27.31         | 119.86          |
| 688                          | 57.25         | 51.24         | 50.23         | 51.16         | 209.88          |
| 689                          | 22.21         | 20.96         | 22.24         | 21.38         | 86.80           |
| 690                          | 17.75         | 16.80         | 15.64         | 17.87         | 68.07           |
| 691                          | 32.65         | 30.83         | 29.32         | 25.79         | 118.59          |
| 692                          | 1.30          | 1.25          | 1.28          | 1.42          | 5.25            |
| 693                          | 31.97         | 31.65         | 27.91         | 27.41         | 118.94          |
| <b>NE - NEBRASKA - Total</b> | <b>480.32</b> | <b>452.28</b> | <b>421.16</b> | <b>414.18</b> | <b>1,767.93</b> |

**STATE: NH - NEW HAMPSHIRE**

| REGISTRANT ZIP CODE 3 | 1ST QUARTER | 2ND QUARTER | 3RD QUARTER | 4TH QUARTER | TOTAL GRAMS |
|-----------------------|-------------|-------------|-------------|-------------|-------------|
| 030                   | 88.71       | 83.16       | 74.32       | 72.31       | 318.50      |
| 031                   | 42.62       | 37.18       | 35.73       | 32.78       | 148.32      |
| 032                   | 21.37       | 21.31       | 18.56       | 18.21       | 79.45       |
| 033                   | 40.10       | 38.68       | 36.41       | 33.49       | 148.68      |

|                                   |               |               |               |               |                 |
|-----------------------------------|---------------|---------------|---------------|---------------|-----------------|
| 034                               | 9.77          | 9.25          | 8.01          | 7.45          | 34.48           |
| 035                               | 14.04         | 12.73         | 10.78         | 10.51         | 48.06           |
| 036                               | 1.56          | 0.69          | 0.63          | 0.45          | 3.34            |
| 037                               | 20.00         | 23.46         | 20.35         | 17.19         | 80.99           |
| 038                               | 68.69         | 65.63         | 57.22         | 50.30         | 241.84          |
| <b>NH - NEW HAMPSHIRE - Total</b> | <b>306.85</b> | <b>292.11</b> | <b>262.01</b> | <b>242.68</b> | <b>1,103.65</b> |

**STATE: NJ - NEW JERSEY**

| REGISTRANT ZIP CODE 3          | 1ST QUARTER     | 2ND QUARTER     | 3RD QUARTER     | 4TH QUARTER     | TOTAL GRAMS     |
|--------------------------------|-----------------|-----------------|-----------------|-----------------|-----------------|
| 070                            | 335.33          | 315.42          | 273.57          | 270.22          | 1,194.54        |
| 071                            | 29.30           | 32.04           | 30.06           | 31.00           | 122.39          |
| 072                            | 12.17           | 13.15           | 12.00           | 10.97           | 48.29           |
| 073                            | 12.75           | 13.68           | 11.33           | 11.62           | 49.38           |
| 074                            | 152.78          | 122.95          | 118.36          | 125.39          | 519.48          |
| 075                            | 25.71           | 16.28           | 15.48           | 17.28           | 74.74           |
| 076                            | 180.85          | 175.36          | 178.97          | 173.96          | 709.14          |
| 077                            | 160.77          | 151.63          | 132.67          | 130.71          | 575.79          |
| 078                            | 60.27           | 55.74           | 55.25           | 52.14           | 223.41          |
| 079                            | 62.34           | 58.31           | 49.53           | 52.66           | 222.84          |
| 080                            | 315.09          | 273.69          | 250.56          | 248.62          | 1,087.96        |
| 081                            | 22.46           | 21.43           | 22.03           | 17.56           | 83.47           |
| 082                            | 50.11           | 44.88           | 42.89           | 38.81           | 176.69          |
| 083                            | 29.59           | 28.36           | 22.46           | 20.96           | 101.38          |
| 084                            | 8.30            | 8.45            | 8.55            | 8.33            | 33.63           |
| 085                            | 50.64           | 45.84           | 43.89           | 45.29           | 185.66          |
| 086                            | 60.08           | 51.31           | 47.28           | 45.36           | 204.03          |
| 087                            | 129.71          | 103.41          | 105.82          | 93.51           | 432.45          |
| 088                            | 614.84          | 226.43          | 214.16          | 209.45          | 1,264.88        |
| 089                            | 20.61           | 23.80           | 22.57           | 23.63           | 90.60           |
| <b>NJ - NEW JERSEY - Total</b> | <b>2,333.70</b> | <b>1,782.18</b> | <b>1,657.43</b> | <b>1,627.45</b> | <b>7,400.76</b> |

**STATE: NM - NEW MEXICO**

| REGISTRANT ZIP CODE 3 | 1ST QUARTER | 2ND QUARTER | 3RD QUARTER | 4TH QUARTER | TOTAL GRAMS |
|-----------------------|-------------|-------------|-------------|-------------|-------------|
| 870                   | 23.16       | 16.51       | 17.67       | 16.33       | 73.66       |
| 871                   | 170.70      | 141.43      | 135.25      | 135.48      | 582.87      |
| 873                   | 7.42        | 6.53        | 6.04        | 5.65        | 25.64       |
| 874                   | 25.54       | 18.70       | 19.64       | 19.40       | 83.28       |
| 875                   | 50.95       | 43.73       | 41.36       | 37.77       | 173.81      |
| 877                   | 5.72        | 5.23        | 4.86        | 4.41        | 20.22       |
| 878                   | 1.89        | 1.44        | 1.26        | 1.09        | 5.69        |
| 879                   | 4.35        | 3.54        | 3.02        | 2.56        | 13.47       |
| 880                   | 27.91       | 24.91       | 22.50       | 22.03       | 97.35       |



|                                |               |               |               |               |                 |
|--------------------------------|---------------|---------------|---------------|---------------|-----------------|
| 881                            | 13.07         | 10.59         | 7.70          | 8.55          | 39.91           |
| 882                            | 46.01         | 43.09         | 40.40         | 37.24         | 166.74          |
| 883                            | 15.58         | 14.17         | 13.71         | 11.57         | 55.04           |
| 884                            | 3.71          | 3.36          | 2.77          | 2.85          | 12.69           |
| <b>NM - NEW MEXICO - Total</b> | <b>396.02</b> | <b>333.23</b> | <b>316.18</b> | <b>304.93</b> | <b>1,350.36</b> |

**STATE: NV - NEVADA**

| REGISTRANT ZIP CODE 3      | 1ST QUARTER   | 2ND QUARTER   | 3RD QUARTER   | 4TH QUARTER   | TOTAL GRAMS     |
|----------------------------|---------------|---------------|---------------|---------------|-----------------|
| 890                        | 122.09        | 110.08        | 97.41         | 85.13         | 414.71          |
| 891                        | 249.11        | 215.16        | 204.17        | 189.40        | 857.84          |
| 893                        | 1.49          | 2.44          | 1.90          | 1.50          | 7.34            |
| 894                        | 36.08         | 32.52         | 26.59         | 24.49         | 119.68          |
| 895                        | 51.32         | 45.70         | 42.28         | 39.70         | 179.00          |
| 897                        | 14.37         | 12.44         | 11.37         | 11.09         | 49.28           |
| 898                        | 7.42          | 8.18          | 7.90          | 9.30          | 32.79           |
| <b>NV - NEVADA - Total</b> | <b>481.88</b> | <b>426.52</b> | <b>391.63</b> | <b>360.60</b> | <b>1,660.62</b> |

**STATE: NY - NEW YORK**

| REGISTRANT ZIP CODE 3 | 1ST QUARTER | 2ND QUARTER | 3RD QUARTER | 4TH QUARTER | TOTAL GRAMS |
|-----------------------|-------------|-------------|-------------|-------------|-------------|
| 100                   | 353.57      | 339.86      | 279.76      | 292.55      | 1,265.74    |
| 101                   | 6.47        | 5.71        | 5.63        | 3.91        | 21.72       |
| 102                   | 0.49        | 0.32        | 0.11        | 0.20        | 1.11        |
| 103                   | 130.45      | 117.52      | 110.98      | 114.84      | 473.79      |
| 104                   | 136.82      | 125.04      | 104.75      | 106.18      | 472.78      |
| 105                   | 99.17       | 101.21      | 88.17       | 91.33       | 379.88      |
| 106                   | 19.78       | 15.72       | 12.82       | 13.54       | 61.87       |
| 107                   | 30.73       | 26.78       | 24.67       | 24.15       | 106.33      |
| 108                   | 9.33        | 6.70        | 5.60        | 4.74        | 26.37       |
| 109                   | 102.73      | 94.34       | 89.37       | 91.90       | 378.34      |
| 110                   | 71.02       | 66.50       | 62.78       | 65.64       | 265.93      |
| 111                   | 15.12       | 17.72       | 13.06       | 13.36       | 59.26       |
| 112                   | 222.30      | 198.93      | 163.73      | 162.71      | 747.68      |
| 113                   | 83.92       | 88.85       | 77.26       | 81.93       | 331.96      |
| 114                   | 49.71       | 59.05       | 54.44       | 38.10       | 201.31      |
| 115                   | 148.15      | 121.90      | 123.62      | 121.12      | 514.79      |
| 116                   | 11.11       | 10.75       | 9.36        | 9.16        | 40.39       |
| 117                   | 401.73      | 387.66      | 337.08      | 339.45      | 1,465.92    |
| 118                   | 17.03       | 12.44       | 12.17       | 14.07       | 55.70       |
| 119                   | 54.70       | 50.59       | 50.97       | 42.01       | 198.27      |
| 120                   | 94.61       | 83.14       | 81.08       | 78.97       | 337.79      |
| 121                   | 38.88       | 36.32       | 35.92       | 31.69       | 142.80      |
| 122                   | 67.23       | 56.60       | 52.11       | 56.44       | 232.38      |

|                              |                 |                 |                 |                 |                  |
|------------------------------|-----------------|-----------------|-----------------|-----------------|------------------|
| 123                          | 28.42           | 25.18           | 25.00           | 23.41           | 102.01           |
| 124                          | 45.83           | 42.39           | 44.26           | 42.24           | 174.72           |
| 125                          | 83.34           | 79.85           | 76.53           | 69.99           | 309.71           |
| 126                          | 29.01           | 26.40           | 26.78           | 25.25           | 107.43           |
| 127                          | 29.22           | 23.36           | 18.37           | 17.89           | 88.85            |
| 128                          | 85.78           | 78.53           | 74.51           | 76.03           | 314.85           |
| 129                          | 46.89           | 41.99           | 36.13           | 33.70           | 158.70           |
| 130                          | 86.04           | 78.13           | 73.05           | 69.29           | 306.51           |
| 131                          | 26.45           | 26.26           | 22.49           | 18.46           | 93.66            |
| 132                          | 101.25          | 81.13           | 72.73           | 72.44           | 327.55           |
| 133                          | 35.83           | 29.27           | 30.87           | 26.78           | 122.75           |
| 134                          | 52.67           | 47.18           | 44.06           | 41.25           | 185.16           |
| 135                          | 23.86           | 19.48           | 17.57           | 14.06           | 74.96            |
| 136                          | 58.09           | 52.51           | 51.88           | 50.03           | 212.52           |
| 137                          | 27.75           | 25.10           | 21.67           | 24.52           | 99.05            |
| 138                          | 73.92           | 64.77           | 63.49           | 60.13           | 262.31           |
| 139                          | 32.24           | 28.87           | 23.40           | 20.20           | 104.72           |
| 140                          | 93.49           | 86.43           | 81.62           | 74.80           | 336.34           |
| 141                          | 49.38           | 45.92           | 43.81           | 37.29           | 176.41           |
| 142                          | 150.18          | 125.85          | 113.32          | 104.01          | 493.36           |
| 143                          | 17.52           | 14.28           | 13.67           | 10.29           | 55.76            |
| 144                          | 67.55           | 62.67           | 61.22           | 57.40           | 248.84           |
| 145                          | 62.87           | 58.09           | 53.25           | 50.47           | 224.69           |
| 146                          | 132.57          | 121.71          | 119.84          | 111.55          | 485.67           |
| 147                          | 48.98           | 42.95           | 37.74           | 37.72           | 167.38           |
| 148                          | 88.43           | 78.10           | 69.78           | 64.27           | 300.58           |
| 149                          | 24.74           | 22.96           | 19.42           | 19.01           | 86.14            |
| <b>NY - NEW YORK - Total</b> | <b>3,767.36</b> | <b>3,452.98</b> | <b>3,131.91</b> | <b>3,050.47</b> | <b>13,402.72</b> |

**STATE: OH - OHIO**

| REGISTRANT ZIP CODE 3 | 1ST QUARTER | 2ND QUARTER | 3RD QUARTER | 4TH QUARTER | TOTAL GRAMS |
|-----------------------|-------------|-------------|-------------|-------------|-------------|
| 430                   | 119.69      | 106.62      | 103.99      | 97.14       | 427.44      |
| 431                   | 73.90       | 60.32       | 58.20       | 52.85       | 245.26      |
| 432                   | 242.24      | 194.34      | 121.55      | 118.12      | 676.25      |
| 433                   | 29.20       | 28.95       | 27.29       | 25.33       | 110.77      |
| 434                   | 29.59       | 22.14       | 20.61       | 16.03       | 88.37       |
| 435                   | 73.40       | 66.13       | 56.89       | 58.54       | 254.96      |
| 436                   | 135.98      | 128.21      | 108.39      | 97.00       | 469.57      |
| 437                   | 32.65       | 30.56       | 28.92       | 28.47       | 120.62      |
| 438                   | 3.57        | 2.81        | 2.72        | 2.79        | 11.88       |
| 439                   | 32.72       | 28.46       | 28.56       | 25.65       | 115.39      |

|                          |                 |                 |                 |                 |                 |
|--------------------------|-----------------|-----------------|-----------------|-----------------|-----------------|
| 440                      | 101.44          | 91.98           | 81.06           | 78.28           | 352.76          |
| 441                      | 157.32          | 166.79          | 148.15          | 131.54          | 603.80          |
| 442                      | 67.48           | 58.34           | 50.21           | 47.20           | 223.23          |
| 443                      | 35.06           | 30.25           | 24.95           | 24.71           | 114.98          |
| 444                      | 45.82           | 42.04           | 35.96           | 31.24           | 155.06          |
| 445                      | 50.60           | 49.89           | 38.95           | 36.66           | 176.10          |
| 446                      | 59.61           | 51.90           | 47.91           | 51.21           | 210.62          |
| 447                      | 46.05           | 42.84           | 42.18           | 40.76           | 171.83          |
| 448                      | 44.89           | 42.61           | 41.22           | 33.85           | 162.57          |
| 449                      | 15.26           | 14.32           | 15.02           | 14.48           | 59.08           |
| 450                      | 126.21          | 118.13          | 109.55          | 103.17          | 457.06          |
| 451                      | 41.61           | 37.56           | 29.68           | 30.52           | 139.36          |
| 452                      | 159.90          | 151.01          | 127.19          | 129.01          | 567.11          |
| 453                      | 92.31           | 90.41           | 92.22           | 89.75           | 364.70          |
| 454                      | 90.62           | 83.83           | 74.01           | 71.60           | 320.06          |
| 455                      | 18.61           | 16.82           | 14.42           | 13.98           | 63.83           |
| 456                      | 75.15           | 70.89           | 65.61           | 60.73           | 272.39          |
| 457                      | 23.89           | 19.29           | 19.57           | 18.16           | 80.91           |
| 458                      | 46.08           | 45.70           | 39.42           | 35.79           | 166.99          |
| <b>OH - OHIO - Total</b> | <b>2,070.84</b> | <b>1,893.13</b> | <b>1,654.43</b> | <b>1,564.55</b> | <b>7,182.96</b> |

**STATE: OK - OKLAHOMA**

| REGISTRANT ZIP CODE 3        | 1ST QUARTER     | 2ND QUARTER     | 3RD QUARTER     | 4TH QUARTER   | TOTAL GRAMS     |
|------------------------------|-----------------|-----------------|-----------------|---------------|-----------------|
| 730                          | 216.90          | 197.87          | 174.29          | 146.46        | 735.52          |
| 731                          | 261.36          | 214.96          | 197.00          | 173.36        | 846.67          |
| 734                          | 39.76           | 33.05           | 30.37           | 25.81         | 128.99          |
| 735                          | 101.67          | 92.04           | 87.56           | 77.20         | 358.46          |
| 736                          | 29.13           | 26.74           | 25.60           | 20.69         | 102.16          |
| 737                          | 38.12           | 35.45           | 33.75           | 27.27         | 134.58          |
| 738                          | 9.39            | 8.48            | 8.25            | 7.20          | 33.33           |
| 739                          | 2.64            | 2.89            | 2.84            | 3.33          | 11.69           |
| 740                          | 243.62          | 195.84          | 163.46          | 121.87        | 724.79          |
| 741                          | 179.71          | 152.93          | 134.22          | 106.38        | 573.24          |
| 743                          | 47.15           | 39.25           | 37.06           | 28.70         | 152.16          |
| 744                          | 84.16           | 71.13           | 64.11           | 51.17         | 270.57          |
| 745                          | 41.35           | 38.40           | 31.12           | 26.16         | 137.03          |
| 746                          | 20.68           | 19.56           | 16.40           | 17.16         | 73.80           |
| 747                          | 28.18           | 26.61           | 26.50           | 22.48         | 103.77          |
| 748                          | 57.49           | 54.40           | 45.30           | 41.38         | 198.56          |
| 749                          | 21.54           | 15.08           | 15.14           | 11.80         | 63.55           |
| <b>OK - OKLAHOMA - Total</b> | <b>1,422.86</b> | <b>1,224.66</b> | <b>1,092.96</b> | <b>908.41</b> | <b>4,648.89</b> |

**STATE: OR - OREGON**

| REGISTRANT ZIP CODE 3      | 1ST QUARTER   | 2ND QUARTER   | 3RD QUARTER   | 4TH QUARTER   | TOTAL GRAMS     |
|----------------------------|---------------|---------------|---------------|---------------|-----------------|
| 970                        | 120.04        | 115.97        | 106.90        | 104.83        | 447.74          |
| 971                        | 71.25         | 67.39         | 61.70         | 57.42         | 257.75          |
| 972                        | 170.49        | 174.64        | 151.55        | 144.74        | 641.43          |
| 973                        | 110.46        | 93.04         | 88.56         | 82.88         | 374.94          |
| 974                        | 144.28        | 128.67        | 115.35        | 102.95        | 491.25          |
| 975                        | 80.93         | 71.69         | 63.13         | 60.48         | 276.23          |
| 976                        | 11.41         | 9.74          | 9.68          | 9.15          | 39.98           |
| 977                        | 49.19         | 46.77         | 44.31         | 42.46         | 182.73          |
| 978                        | 38.10         | 36.91         | 35.15         | 32.60         | 142.75          |
| 979                        | 12.65         | 11.60         | 12.68         | 10.45         | 47.38           |
| <b>OR - OREGON - Total</b> | <b>808.80</b> | <b>756.41</b> | <b>689.02</b> | <b>647.95</b> | <b>2,902.19</b> |

**STATE: PA - PENNSYLVANIA**

| REGISTRANT ZIP CODE 3 | 1ST QUARTER | 2ND QUARTER | 3RD QUARTER | 4TH QUARTER | TOTAL GRAMS |
|-----------------------|-------------|-------------|-------------|-------------|-------------|
| 150                   | 192.93      | 165.59      | 149.18      | 144.46      | 652.15      |
| 151                   | 105.25      | 94.90       | 86.96       | 81.25       | 368.37      |
| 152                   | 202.91      | 193.20      | 171.81      | 169.59      | 737.51      |
| 153                   | 39.83       | 37.08       | 35.44       | 32.17       | 144.53      |
| 154                   | 42.99       | 40.56       | 35.49       | 32.78       | 151.81      |
| 155                   | 34.89       | 29.21       | 26.69       | 20.75       | 111.55      |
| 156                   | 99.96       | 91.06       | 83.53       | 81.00       | 355.55      |
| 157                   | 66.87       | 65.65       | 59.69       | 51.37       | 243.58      |
| 158                   | 52.12       | 50.60       | 48.66       | 44.75       | 196.14      |
| 159                   | 67.42       | 55.32       | 53.85       | 44.76       | 221.36      |
| 160                   | 76.89       | 71.14       | 72.13       | 66.87       | 287.03      |
| 161                   | 70.52       | 63.91       | 57.04       | 55.53       | 247.00      |
| 162                   | 34.23       | 32.57       | 28.86       | 24.92       | 120.58      |
| 163                   | 85.04       | 77.97       | 66.91       | 66.89       | 296.82      |
| 164                   | 23.57       | 24.04       | 20.30       | 18.87       | 86.78       |
| 165                   | 62.51       | 59.14       | 53.36       | 53.24       | 228.26      |
| 166                   | 97.01       | 82.12       | 78.33       | 69.73       | 327.19      |
| 167                   | 16.98       | 14.25       | 13.13       | 11.98       | 56.34       |
| 168                   | 39.82       | 30.25       | 31.07       | 24.62       | 125.76      |
| 169                   | 18.66       | 18.23       | 13.54       | 14.86       | 65.29       |
| 170                   | 187.58      | 173.47      | 163.62      | 149.13      | 673.81      |
| 171                   | 43.60       | 41.99       | 30.77       | 29.42       | 145.78      |
| 172                   | 45.91       | 47.34       | 45.24       | 41.41       | 179.91      |
| 173                   | 88.75       | 79.48       | 69.94       | 69.69       | 307.87      |
| 174                   | 57.12       | 56.43       | 47.19       | 40.70       | 201.44      |

|                                  |                 |                 |                 |                 |                  |
|----------------------------------|-----------------|-----------------|-----------------|-----------------|------------------|
| 175                              | 51.23           | 50.68           | 43.62           | 42.78           | 188.32           |
| 176                              | 50.26           | 49.52           | 45.24           | 43.51           | 188.53           |
| 177                              | 72.85           | 64.72           | 59.21           | 56.47           | 253.25           |
| 178                              | 92.40           | 79.60           | 78.52           | 75.81           | 326.34           |
| 179                              | 34.67           | 32.00           | 31.88           | 29.48           | 128.02           |
| 180                              | 129.63          | 114.57          | 103.90          | 108.98          | 457.09           |
| 181                              | 81.80           | 78.96           | 73.18           | 69.99           | 303.93           |
| 182                              | 49.32           | 45.42           | 46.75           | 44.08           | 185.57           |
| 183                              | 52.68           | 46.39           | 43.90           | 41.02           | 183.99           |
| 184                              | 61.69           | 56.01           | 55.48           | 45.29           | 218.46           |
| 185                              | 74.62           | 64.58           | 59.70           | 58.85           | 257.75           |
| 186                              | 63.17           | 62.69           | 52.20           | 50.87           | 228.93           |
| 187                              | 259.31          | 237.80          | 212.88          | 229.89          | 939.88           |
| 188                              | 30.85           | 23.40           | 23.05           | 23.41           | 100.72           |
| 189                              | 99.34           | 90.75           | 86.77           | 82.19           | 359.05           |
| 190                              | 625.60          | 496.98          | 602.38          | 393.12          | 2,118.08         |
| 191                              | 294.62          | 283.02          | 244.78          | 240.87          | 1,063.29         |
| 193                              | 94.81           | 85.57           | 79.85           | 78.62           | 338.84           |
| 194                              | 153.90          | 144.59          | 132.83          | 133.88          | 565.20           |
| 195                              | 43.62           | 38.27           | 37.18           | 34.28           | 153.36           |
| 196                              | 44.69           | 41.26           | 39.93           | 39.23           | 165.12           |
| <b>PA - PENNSYLVANIA - Total</b> | <b>4,314.42</b> | <b>3,882.29</b> | <b>3,696.00</b> | <b>3,363.39</b> | <b>15,256.11</b> |

**STATE: PR - PUERTO RICO**

| REGISTRANT ZIP CODE 3           | 1ST QUARTER  | 2ND QUARTER  | 3RD QUARTER   | 4TH QUARTER   | TOTAL GRAMS   |
|---------------------------------|--------------|--------------|---------------|---------------|---------------|
| 006                             | 13.11        | 14.38        | 41.65         | 43.06         | 112.20        |
| 007                             | 29.66        | 27.91        | 58.82         | 59.54         | 175.93        |
| 009                             | 35.05        | 39.11        | 61.16         | 65.36         | 200.68        |
| <b>PR - PUERTO RICO - Total</b> | <b>77.83</b> | <b>81.40</b> | <b>161.63</b> | <b>167.96</b> | <b>488.81</b> |

**STATE: RI - RHODE ISLAND**

| REGISTRANT ZIP CODE 3            | 1ST QUARTER   | 2ND QUARTER   | 3RD QUARTER   | 4TH QUARTER   | TOTAL GRAMS   |
|----------------------------------|---------------|---------------|---------------|---------------|---------------|
| 028                              | 99.63         | 82.39         | 87.49         | 82.67         | 352.18        |
| 029                              | 63.12         | 56.97         | 52.30         | 50.39         | 222.78        |
| <b>RI - RHODE ISLAND - Total</b> | <b>162.75</b> | <b>139.36</b> | <b>139.79</b> | <b>133.06</b> | <b>574.96</b> |

**STATE: SC - SOUTH CAROLINA**

| REGISTRANT ZIP CODE 3 | 1ST QUARTER | 2ND QUARTER | 3RD QUARTER | 4TH QUARTER | TOTAL GRAMS |
|-----------------------|-------------|-------------|-------------|-------------|-------------|
| 290                   | 72.63       | 67.53       | 68.37       | 62.31       | 270.85      |
| 291                   | 93.08       | 76.36       | 72.67       | 72.99       | 315.10      |
| 292                   | 79.37       | 71.69       | 72.93       | 62.11       | 286.10      |
| 293                   | 101.15      | 86.59       | 81.64       | 78.26       | 347.64      |
| 294                   | 186.69      | 162.31      | 159.88      | 150.01      | 658.89      |

|                                    |                 |                 |               |               |                 |
|------------------------------------|-----------------|-----------------|---------------|---------------|-----------------|
| 295                                | 210.05          | 178.91          | 172.47        | 168.07        | <b>729.50</b>   |
| 296                                | 240.69          | 207.02          | 198.44        | 174.07        | <b>820.23</b>   |
| 297                                | 52.62           | 42.93           | 39.47         | 39.49         | <b>174.51</b>   |
| 298                                | 65.12           | 62.25           | 57.23         | 57.14         | <b>241.74</b>   |
| 299                                | 70.42           | 49.80           | 55.11         | 56.44         | <b>231.77</b>   |
| <b>SC - SOUTH CAROLINA - Total</b> | <b>1,171.83</b> | <b>1,005.39</b> | <b>978.22</b> | <b>920.89</b> | <b>4,076.33</b> |

**STATE: SD - SOUTH DAKOTA**

| REGISTRANT ZIP CODE 3            | 1ST QUARTER   | 2ND QUARTER   | 3RD QUARTER   | 4TH QUARTER   | TOTAL GRAMS   |
|----------------------------------|---------------|---------------|---------------|---------------|---------------|
| 570                              | 43.40         | 41.86         | 41.81         | 39.09         | <b>166.16</b> |
| 571                              | 100.61        | 95.74         | 83.01         | 79.64         | <b>359.01</b> |
| 572                              | 17.77         | 16.19         | 16.37         | 13.02         | <b>63.34</b>  |
| 573                              | 23.16         | 20.05         | 18.99         | 17.74         | <b>79.94</b>  |
| 574                              | 17.63         | 15.83         | 15.86         | 13.81         | <b>63.14</b>  |
| 575                              | 13.65         | 13.43         | 12.19         | 13.81         | <b>53.08</b>  |
| 576                              | 5.14          | 2.94          | 2.51          | 2.56          | <b>13.14</b>  |
| 577                              | 36.95         | 27.34         | 25.42         | 20.46         | <b>110.17</b> |
| <b>SD - SOUTH DAKOTA - Total</b> | <b>258.33</b> | <b>233.37</b> | <b>216.15</b> | <b>200.14</b> | <b>907.99</b> |

**STATE: TN - TENNESSEE**

| REGISTRANT ZIP CODE 3         | 1ST QUARTER     | 2ND QUARTER     | 3RD QUARTER     | 4TH QUARTER     | TOTAL GRAMS     |
|-------------------------------|-----------------|-----------------|-----------------|-----------------|-----------------|
| 370                           | 183.33          | 162.13          | 145.01          | 128.83          | <b>619.30</b>   |
| 371                           | 152.66          | 136.48          | 123.29          | 115.66          | <b>528.09</b>   |
| 372                           | 150.12          | 135.96          | 106.12          | 100.90          | <b>493.10</b>   |
| 373                           | 119.03          | 105.05          | 94.07           | 87.40           | <b>405.54</b>   |
| 374                           | 58.85           | 41.70           | 36.33           | 33.45           | <b>170.33</b>   |
| 376                           | 116.82          | 111.14          | 100.41          | 90.39           | <b>418.76</b>   |
| 377                           | 56.56           | 50.80           | 48.04           | 46.39           | <b>201.79</b>   |
| 378                           | 111.06          | 99.93           | 90.42           | 92.97           | <b>394.38</b>   |
| 379                           | 88.09           | 83.24           | 72.90           | 77.52           | <b>321.75</b>   |
| 380                           | 82.08           | 71.36           | 62.26           | 62.31           | <b>278.01</b>   |
| 381                           | 435.66          | 310.40          | 421.15          | 231.90          | <b>1,399.12</b> |
| 382                           | 27.40           | 23.63           | 21.39           | 18.24           | <b>90.66</b>    |
| 383                           | 68.62           | 62.22           | 53.25           | 51.62           | <b>235.71</b>   |
| 384                           | 37.66           | 41.07           | 33.17           | 32.43           | <b>144.33</b>   |
| 385                           | 80.05           | 74.12           | 63.34           | 57.95           | <b>275.46</b>   |
| <b>TN - TENNESSEE - Total</b> | <b>1,767.99</b> | <b>1,509.25</b> | <b>1,471.14</b> | <b>1,227.94</b> | <b>5,976.32</b> |

**STATE: TX - TEXAS**

| REGISTRANT ZIP CODE 3 | 1ST QUARTER | 2ND QUARTER | 3RD QUARTER | 4TH QUARTER | TOTAL GRAMS     |
|-----------------------|-------------|-------------|-------------|-------------|-----------------|
| 750                   | 454.76      | 402.01      | 375.79      | 369.46      | <b>1,602.01</b> |
| 751                   | 131.72      | 117.74      | 113.95      | 106.86      | <b>470.27</b>   |
| 752                   | 191.71      | 181.11      | 153.85      | 141.69      | <b>668.36</b>   |

ARCOS 3 - REPORT 01 by GRAMS  
RETAIL DRUG DISTRIBUTION BY ZIP CODE WITHIN STATE

|     |        |        |        |        |                 |
|-----|--------|--------|--------|--------|-----------------|
| 753 | 12.76  | 11.77  | 8.97   | 11.48  | <b>44.98</b>    |
| 754 | 131.48 | 120.19 | 107.36 | 99.66  | <b>458.69</b>   |
| 755 | 22.28  | 22.46  | 24.71  | 19.39  | <b>88.84</b>    |
| 756 | 68.09  | 115.26 | 61.12  | 73.23  | <b>317.69</b>   |
| 757 | 125.82 | 123.18 | 109.73 | 110.73 | <b>469.45</b>   |
| 758 | 20.35  | 18.27  | 14.83  | 16.53  | <b>69.98</b>    |
| 759 | 50.96  | 45.01  | 40.95  | 40.88  | <b>177.80</b>   |
| 760 | 311.90 | 265.84 | 237.10 | 225.98 | <b>1,040.83</b> |
| 761 | 284.57 | 244.38 | 238.25 | 216.06 | <b>983.26</b>   |
| 762 | 116.99 | 111.49 | 105.79 | 99.39  | <b>433.67</b>   |
| 763 | 77.69  | 66.47  | 63.40  | 60.88  | <b>268.45</b>   |
| 764 | 48.34  | 43.68  | 38.73  | 36.02  | <b>166.77</b>   |
| 765 | 74.33  | 64.31  | 62.24  | 54.78  | <b>255.66</b>   |
| 766 | 25.86  | 22.41  | 21.45  | 17.92  | <b>87.64</b>    |
| 767 | 45.10  | 41.50  | 30.99  | 29.40  | <b>147.00</b>   |
| 768 | 36.55  | 32.18  | 31.29  | 30.30  | <b>130.32</b>   |
| 769 | 31.33  | 20.67  | 18.50  | 17.28  | <b>87.78</b>    |
| 770 | 332.39 | 299.70 | 271.32 | 261.91 | <b>1,165.32</b> |
| 772 | 0.03   | 0      | 0.01   | 0      | <b>0.04</b>     |
| 773 | 233.68 | 203.16 | 189.55 | 179.24 | <b>805.64</b>   |
| 774 | 170.17 | 138.74 | 131.94 | 126.50 | <b>567.35</b>   |
| 775 | 203.45 | 185.29 | 172.43 | 168.06 | <b>729.23</b>   |
| 776 | 52.60  | 47.11  | 46.16  | 45.23  | <b>191.10</b>   |
| 777 | 28.01  | 21.73  | 24.10  | 23.34  | <b>97.19</b>    |
| 778 | 56.64  | 51.61  | 48.48  | 45.00  | <b>201.73</b>   |
| 779 | 51.89  | 48.71  | 49.12  | 42.38  | <b>192.10</b>   |
| 780 | 71.91  | 67.82  | 64.10  | 58.39  | <b>262.21</b>   |
| 781 | 77.40  | 69.42  | 64.97  | 56.50  | <b>268.28</b>   |
| 782 | 381.57 | 375.39 | 340.70 | 287.23 | <b>1,384.89</b> |
| 783 | 40.05  | 37.29  | 31.20  | 29.76  | <b>138.30</b>   |
| 784 | 84.36  | 78.10  | 70.50  | 66.15  | <b>299.10</b>   |
| 785 | 113.53 | 111.08 | 103.08 | 96.13  | <b>423.82</b>   |
| 786 | 207.87 | 171.78 | 145.37 | 125.47 | <b>650.49</b>   |
| 787 | 184.44 | 168.69 | 149.18 | 137.12 | <b>639.44</b>   |
| 788 | 17.32  | 15.92  | 13.11  | 9.42   | <b>55.77</b>    |
| 789 | 11.73  | 10.06  | 9.45   | 6.33   | <b>37.57</b>    |
| 790 | 55.27  | 48.91  | 42.84  | 40.57  | <b>187.59</b>   |
| 791 | 100.47 | 93.19  | 83.63  | 77.41  | <b>354.70</b>   |
| 792 | 9.68   | 9.41   | 8.42   | 8.16   | <b>35.67</b>    |
| 793 | 29.17  | 26.06  | 23.94  | 23.89  | <b>103.06</b>   |

|                           |                 |                 |                 |                 |                  |
|---------------------------|-----------------|-----------------|-----------------|-----------------|------------------|
| 794                       | 99.28           | 83.30           | 81.20           | 76.27           | 340.04           |
| 795                       | 30.08           | 27.64           | 24.80           | 22.19           | 104.71           |
| 796                       | 59.91           | 52.95           | 50.28           | 47.45           | 210.59           |
| 797                       | 51.95           | 43.83           | 37.42           | 35.27           | 168.47           |
| 798                       | 4.86            | 4.47            | 3.98            | 4.51            | 17.82            |
| 799                       | 114.16          | 100.32          | 91.45           | 80.56           | 386.50           |
| <b>TX - TEXAS - Total</b> | <b>5,136.47</b> | <b>4,661.60</b> | <b>4,231.75</b> | <b>3,958.35</b> | <b>17,988.16</b> |

**STATE: UT - UTAH**

| REGISTRANT ZIP CODE 3    | 1ST QUARTER   | 2ND QUARTER   | 3RD QUARTER   | 4TH QUARTER   | TOTAL GRAMS     |
|--------------------------|---------------|---------------|---------------|---------------|-----------------|
| 840                      | 261.58        | 240.59        | 227.64        | 221.07        | 950.88          |
| 841                      | 186.76        | 157.56        | 145.64        | 141.79        | 631.76          |
| 843                      | 50.32         | 38.64         | 36.13         | 32.51         | 157.59          |
| 844                      | 57.82         | 51.99         | 50.44         | 47.48         | 207.73          |
| 845                      | 25.21         | 23.53         | 23.69         | 21.79         | 94.21           |
| 846                      | 65.24         | 64.72         | 61.35         | 62.70         | 254.01          |
| 847                      | 107.97        | 98.60         | 93.68         | 92.55         | 392.80          |
| <b>UT - UTAH - Total</b> | <b>754.91</b> | <b>675.62</b> | <b>638.57</b> | <b>619.90</b> | <b>2,688.99</b> |

**STATE: VA - VIRGINIA**

| REGISTRANT ZIP CODE 3 | 1ST QUARTER | 2ND QUARTER | 3RD QUARTER | 4TH QUARTER | TOTAL GRAMS |
|-----------------------|-------------|-------------|-------------|-------------|-------------|
| 201                   | 107.92      | 93.36       | 87.19       | 87.80       | 376.27      |
| 220                   | 51.86       | 42.51       | 40.32       | 41.23       | 175.93      |
| 221                   | 32.40       | 29.61       | 29.05       | 28.53       | 119.60      |
| 222                   | 12.72       | 12.32       | 11.66       | 8.80        | 45.51       |
| 223                   | 23.84       | 21.29       | 20.73       | 16.96       | 82.82       |
| 224                   | 38.25       | 34.16       | 28.99       | 29.90       | 131.30      |
| 225                   | 16.27       | 13.23       | 14.24       | 11.30       | 55.05       |
| 226                   | 49.51       | 44.57       | 39.96       | 38.03       | 172.06      |
| 227                   | 8.43        | 9.25        | 7.81        | 7.47        | 32.96       |
| 228                   | 44.83       | 40.19       | 38.35       | 40.63       | 164.00      |
| 229                   | 64.77       | 63.74       | 56.00       | 48.87       | 233.37      |
| 230                   | 48.38       | 45.00       | 41.08       | 43.28       | 177.73      |
| 231                   | 70.54       | 61.27       | 53.98       | 54.79       | 240.58      |
| 232                   | 140.77      | 124.33      | 115.86      | 106.54      | 487.50      |
| 233                   | 61.79       | 58.55       | 55.29       | 52.60       | 228.23      |
| 234                   | 123.60      | 116.10      | 107.79      | 99.07       | 446.56      |
| 235                   | 38.96       | 43.90       | 37.69       | 37.50       | 158.05      |
| 236                   | 70.70       | 64.52       | 59.37       | 55.32       | 249.90      |
| 237                   | 35.98       | 33.53       | 25.29       | 26.10       | 120.89      |
| 238                   | 49.55       | 41.26       | 39.73       | 35.49       | 166.02      |
| 239                   | 12.04       | 12.20       | 10.99       | 12.45       | 47.69       |



|                              |                 |                 |                 |                 |                 |
|------------------------------|-----------------|-----------------|-----------------|-----------------|-----------------|
| 240                          | 86.68           | 73.18           | 74.19           | 74.60           | 308.64          |
| 241                          | 63.45           | 58.99           | 52.86           | 48.87           | 224.16          |
| 242                          | 70.61           | 62.98           | 61.01           | 57.42           | 252.01          |
| 243                          | 33.94           | 33.92           | 26.75           | 27.24           | 121.84          |
| 244                          | 43.17           | 39.68           | 39.10           | 35.27           | 157.23          |
| 245                          | 71.04           | 67.44           | 64.13           | 57.71           | 260.32          |
| 246                          | 20.40           | 18.58           | 17.10           | 16.54           | 72.62           |
| <b>VA - VIRGINIA - Total</b> | <b>1,492.39</b> | <b>1,359.62</b> | <b>1,256.52</b> | <b>1,200.31</b> | <b>5,308.84</b> |

**STATE: VI - VIRGIN ISLANDS**

| REGISTRANT ZIP CODE 3              | 1ST QUARTER | 2ND QUARTER | 3RD QUARTER | 4TH QUARTER | TOTAL GRAMS  |
|------------------------------------|-------------|-------------|-------------|-------------|--------------|
| 008                                | 3.93        | 4.58        | 5.41        | 4.01        | 17.93        |
| <b>VI - VIRGIN ISLANDS - Total</b> | <b>3.93</b> | <b>4.58</b> | <b>5.41</b> | <b>4.01</b> | <b>17.93</b> |

**STATE: VT - VERMONT**

| REGISTRANT ZIP CODE 3       | 1ST QUARTER   | 2ND QUARTER   | 3RD QUARTER   | 4TH QUARTER   | TOTAL GRAMS   |
|-----------------------------|---------------|---------------|---------------|---------------|---------------|
| 050                         | 7.91          | 7.63          | 7.89          | 5.84          | 29.26         |
| 051                         | 6.10          | 4.72          | 3.51          | 3.48          | 17.82         |
| 052                         | 11.14         | 10.36         | 9.71          | 9.72          | 40.94         |
| 053                         | 4.60          | 4.68          | 4.38          | 4.10          | 17.76         |
| 054                         | 70.77         | 66.08         | 56.73         | 59.59         | 253.17        |
| 056                         | 22.22         | 19.80         | 18.50         | 18.76         | 79.27         |
| 057                         | 27.95         | 27.15         | 23.04         | 21.04         | 99.18         |
| 058                         | 16.69         | 14.66         | 15.92         | 12.89         | 60.16         |
| <b>VT - VERMONT - Total</b> | <b>167.38</b> | <b>155.09</b> | <b>139.68</b> | <b>135.42</b> | <b>597.57</b> |

**STATE: WA - WASHINGTON**

| REGISTRANT ZIP CODE 3          | 1ST QUARTER     | 2ND QUARTER     | 3RD QUARTER     | 4TH QUARTER     | TOTAL GRAMS     |
|--------------------------------|-----------------|-----------------|-----------------|-----------------|-----------------|
| 980                            | 165.48          | 160.34          | 151.95          | 143.93          | 621.70          |
| 981                            | 157.36          | 151.64          | 131.45          | 130.56          | 571.01          |
| 982                            | 133.60          | 136.66          | 121.95          | 122.31          | 514.52          |
| 983                            | 136.20          | 125.31          | 118.14          | 106.41          | 486.06          |
| 984                            | 82.91           | 74.15           | 63.48           | 56.66           | 277.19          |
| 985                            | 69.54           | 66.93           | 61.84           | 63.63           | 261.95          |
| 986                            | 150.92          | 144.07          | 147.94          | 142.40          | 585.34          |
| 988                            | 34.88           | 33.64           | 30.17           | 28.70           | 127.39          |
| 989                            | 60.72           | 60.63           | 51.74           | 42.80           | 215.89          |
| 990                            | 21.63           | 22.83           | 22.60           | 16.21           | 83.27           |
| 991                            | 32.46           | 30.98           | 28.94           | 24.80           | 117.18          |
| 992                            | 155.87          | 139.47          | 131.54          | 117.45          | 544.33          |
| 993                            | 104.28          | 96.13           | 90.78           | 87.53           | 378.71          |
| 994                            | 20.85           | 19.32           | 16.26           | 17.76           | 74.18           |
| <b>WA - WASHINGTON - Total</b> | <b>1,326.71</b> | <b>1,262.09</b> | <b>1,168.78</b> | <b>1,101.16</b> | <b>4,858.73</b> |

**STATE: WI - WISCONSIN**

| REGISTRANT ZIP CODE 3         | 1ST QUARTER     | 2ND QUARTER     | 3RD QUARTER     | 4TH QUARTER   | TOTAL GRAMS     |
|-------------------------------|-----------------|-----------------|-----------------|---------------|-----------------|
| 530                           | 132.67          | 112.96          | 103.07          | 100.31        | 449.01          |
| 531                           | 135.54          | 127.69          | 103.41          | 89.94         | 456.59          |
| 532                           | 206.78          | 180.03          | 157.88          | 132.97        | 677.66          |
| 534                           | 24.10           | 20.74           | 18.52           | 15.64         | 78.99           |
| 535                           | 116.34          | 108.86          | 98.84           | 92.17         | 416.22          |
| 537                           | 84.01           | 73.13           | 70.33           | 63.18         | 290.65          |
| 538                           | 18.72           | 16.29           | 19.17           | 17.38         | 71.56           |
| 539                           | 53.90           | 49.29           | 46.05           | 44.27         | 193.51          |
| 540                           | 20.29           | 17.49           | 16.55           | 17.76         | 72.09           |
| 541                           | 35.73           | 32.44           | 31.87           | 27.12         | 127.16          |
| 542                           | 20.71           | 21.47           | 21.44           | 16.64         | 80.27           |
| 543                           | 51.13           | 40.15           | 37.90           | 35.92         | 165.11          |
| 544                           | 60.25           | 56.00           | 56.03           | 54.36         | 226.63          |
| 545                           | 15.08           | 12.57           | 12.38           | 12.16         | 52.19           |
| 546                           | 83.31           | 74.46           | 66.03           | 63.26         | 287.07          |
| 547                           | 66.35           | 54.48           | 52.82           | 56.27         | 229.92          |
| 548                           | 35.63           | 33.06           | 31.66           | 28.31         | 128.65          |
| 549                           | 155.33          | 137.29          | 132.46          | 129.37        | 554.45          |
| <b>WI - WISCONSIN - Total</b> | <b>1,315.89</b> | <b>1,168.39</b> | <b>1,076.41</b> | <b>997.05</b> | <b>4,557.74</b> |

**STATE: WV - WEST VIRGINIA**

| REGISTRANT ZIP CODE 3 | 1ST QUARTER | 2ND QUARTER | 3RD QUARTER | 4TH QUARTER | TOTAL GRAMS |
|-----------------------|-------------|-------------|-------------|-------------|-------------|
| 247                   | 14.06       | 13.36       | 12.17       | 11.87       | 51.46       |
| 248                   | 5.67        | 4.58        | 5.24        | 3.93        | 19.43       |
| 249                   | 6.13        | 6.45        | 5.78        | 3.96        | 22.31       |
| 250                   | 15.12       | 13.37       | 12.70       | 11.54       | 52.73       |
| 251                   | 6.22        | 11.54       | 9.14        | 8.27        | 35.16       |
| 252                   | 12.47       | 9.73        | 7.55        | 7.37        | 37.12       |
| 253                   | 60.72       | 48.96       | 40.96       | 41.47       | 192.11      |
| 254                   | 60.29       | 55.49       | 47.79       | 49.63       | 213.20      |
| 255                   | 24.79       | 22.54       | 19.88       | 19.20       | 86.41       |
| 256                   | 7.56        | 8.61        | 7.22        | 7.66        | 31.06       |
| 257                   | 34.78       | 38.91       | 33.28       | 39.94       | 146.90      |
| 258                   | 18.28       | 16.46       | 15.17       | 16.69       | 66.61       |
| 259                   | 9.86        | 8.03        | 6.73        | 7.01        | 31.64       |
| 260                   | 35.78       | 31.16       | 29.92       | 28.04       | 124.89      |
| 261                   | 26.91       | 19.12       | 16.65       | 16.06       | 78.73       |
| 262                   | 19.34       | 17.68       | 17.17       | 14.23       | 68.42       |
| 263                   | 27.05       | 24.60       | 24.24       | 24.26       | 100.15      |

|                                   |               |               |               |               |                 |
|-----------------------------------|---------------|---------------|---------------|---------------|-----------------|
| 264                               | 8.96          | 10.36         | 10.45         | 8.69          | <b>38.46</b>    |
| 265                               | 53.67         | 51.01         | 44.83         | 47.33         | <b>196.85</b>   |
| 266                               | 7.80          | 5.98          | 5.32          | 5.38          | <b>24.47</b>    |
| 267                               | 16.94         | 16.97         | 15.54         | 14.20         | <b>63.66</b>    |
| 268                               | 8.00          | 8.61          | 7.25          | 5.04          | <b>28.91</b>    |
| <b>WV - WEST VIRGINIA - Total</b> | <b>480.43</b> | <b>443.49</b> | <b>394.99</b> | <b>391.76</b> | <b>1,710.68</b> |

**STATE: WY - WYOMING**

| REGISTRANT ZIP CODE 3       | 1ST QUARTER   | 2ND QUARTER   | 3RD QUARTER   | 4TH QUARTER   | TOTAL GRAMS   |
|-----------------------------|---------------|---------------|---------------|---------------|---------------|
| 820                         | 27.25         | 22.73         | 20.83         | 20.09         | <b>90.89</b>  |
| 822                         | 6.08          | 6.38          | 5.15          | 5.49          | <b>23.11</b>  |
| 823                         | 1.50          | 1.24          | 1.22          | 0.78          | <b>4.75</b>   |
| 824                         | 18.99         | 16.35         | 18.63         | 14.81         | <b>68.78</b>  |
| 825                         | 7.68          | 5.44          | 5.49          | 5.34          | <b>23.94</b>  |
| 826                         | 23.16         | 22.43         | 21.34         | 19.80         | <b>86.73</b>  |
| 827                         | 5.48          | 5.68          | 6.16          | 4.11          | <b>21.44</b>  |
| 828                         | 8.20          | 7.05          | 6.82          | 5.85          | <b>27.92</b>  |
| 829                         | 31.07         | 24.87         | 22.89         | 24.68         | <b>103.51</b> |
| 830                         | 5.62          | 4.21          | 4.27          | 3.84          | <b>17.94</b>  |
| 831                         | 6.03          | 4.52          | 4.94          | 6.21          | <b>21.71</b>  |
| <b>WY - WYOMING - Total</b> | <b>141.06</b> | <b>120.91</b> | <b>117.74</b> | <b>111.00</b> | <b>490.71</b> |

**DRUG: 1100 - AMPHETAMINE**

| STATE                | 1ST QUARTER | 2ND QUARTER | 3RD QUARTER | 4TH QUARTER | TOTAL GRAMS  |
|----------------------|-------------|-------------|-------------|-------------|--------------|
| ALABAMA              | 135,476.45  | 134,539.67  | 137,334.74  | 137,252.15  | 544,603.01   |
| ALASKA               | 8,200.25    | 8,513.41    | 8,518.59    | 8,668.44    | 33,900.69    |
| AMERICAN SAMOA       | 0           | 2.50        | 0           | 0           | 2.50         |
| ARIZONA              | 87,488.48   | 94,365.76   | 102,044.82  | 92,476.65   | 376,375.70   |
| ARKANSAS             | 52,324.62   | 51,480.47   | 52,927.92   | 52,539.62   | 209,272.63   |
| CALIFORNIA           | 300,208.74  | 309,327.49  | 305,214.17  | 313,452.33  | 1,228,202.73 |
| COLORADO             | 83,248.50   | 84,854.33   | 87,509.13   | 89,339.44   | 344,951.40   |
| CONNECTICUT          | 55,629.20   | 55,915.61   | 57,420.84   | 58,251.72   | 227,217.37   |
| DELAWARE             | 21,085.06   | 21,261.45   | 21,178.96   | 21,541.78   | 85,067.25    |
| DISTRICT OF COLUMBIA | 12,090.86   | 12,441.63   | 12,465.45   | 12,530.71   | 49,528.65    |
| FLORIDA              | 319,019.15  | 323,318.57  | 320,630.26  | 323,934.22  | 1,286,902.21 |
| GEORGIA              | 196,409.28  | 192,243.75  | 198,303.85  | 199,123.65  | 786,080.52   |
| GUAM                 | 371.55      | 474.05      | 488.00      | 425.77      | 1,759.37     |
| HAWAII               | 10,119.13   | 10,318.54   | 10,676.67   | 10,119.02   | 41,233.36    |
| IDAHO                | 27,251.22   | 27,959.13   | 28,207.65   | 29,402.52   | 112,820.52   |
| ILLINOIS             | 196,812.32  | 197,343.37  | 201,042.12  | 204,928.58  | 800,126.39   |
| INDIANA              | 134,905.57  | 134,666.73  | 137,057.34  | 138,147.04  | 544,776.67   |
| IOWA                 | 51,563.94   | 51,941.54   | 53,160.32   | 54,137.53   | 210,803.33   |
| KANSAS               | 62,589.40   | 63,212.10   | 64,115.24   | 64,634.36   | 254,551.10   |
| KENTUCKY             | 72,196.77   | 70,509.45   | 71,489.75   | 72,311.88   | 286,507.85   |
| LOUISIANA            | 162,113.52  | 161,690.52  | 168,800.94  | 169,361.04  | 661,966.01   |
| MAINE                | 23,492.06   | 23,529.79   | 24,881.99   | 24,503.48   | 96,407.31    |
| MARYLAND             | 94,580.51   | 97,001.98   | 95,864.34   | 98,045.05   | 385,491.88   |
| MASSACHUSETTS        | 180,782.88  | 181,178.42  | 183,546.84  | 186,618.99  | 732,127.12   |
| MICHIGAN             | 244,857.64  | 243,689.95  | 243,316.89  | 246,963.00  | 978,827.49   |
| MINNESOTA            | 110,209.54  | 110,828.85  | 110,480.36  | 115,207.26  | 446,726.01   |
| MISSISSIPPI          | 61,959.09   | 60,749.14   | 62,922.53   | 61,716.51   | 247,347.27   |
| MISSOURI             | 136,734.01  | 137,180.84  | 141,555.73  | 154,782.23  | 570,252.80   |
| MONTANA              | 14,318.39   | 14,715.49   | 14,864.09   | 15,189.87   | 59,087.84    |
| NEBRASKA             | 26,760.12   | 27,240.52   | 27,621.89   | 28,395.64   | 110,018.17   |
| NEVADA               | 26,446.23   | 26,727.17   | 27,429.70   | 27,450.72   | 108,053.81   |
| NEW HAMPSHIRE        | 39,302.49   | 40,236.40   | 41,310.22   | 40,604.80   | 161,453.90   |
| NEW JERSEY           | 106,182.82  | 109,314.85  | 110,044.20  | 112,697.38  | 438,239.25   |
| NEW MEXICO           | 14,967.28   | 15,203.27   | 15,463.42   | 15,562.75   | 61,196.72    |
| NEW YORK             | 242,980.79  | 250,546.17  | 249,153.25  | 256,466.39  | 999,146.60   |
| NORTH CAROLINA       | 212,289.15  | 208,548.54  | 212,799.85  | 220,673.55  | 854,311.09   |
| NORTH DAKOTA         | 9,199.58    | 9,183.41    | 9,486.72    | 9,637.35    | 37,507.06    |
| OHIO                 | 213,799.88  | 209,380.92  | 201,041.51  | 207,477.66  | 831,699.97   |
| OKLAHOMA             | 54,762.92   | 54,197.33   | 54,995.55   | 55,124.71   | 219,080.50   |
| OREGON               | 60,579.93   | 63,167.43   | 62,182.52   | 63,991.50   | 249,921.37   |
| PENNSYLVANIA         | 213,400.03  | 215,641.98  | 214,275.61  | 215,447.84  | 858,765.46   |

|                                   |                     |                     |                     |                     |                      |
|-----------------------------------|---------------------|---------------------|---------------------|---------------------|----------------------|
| PUERTO RICO                       | 9,570.15            | 9,204.07            | 9,292.09            | 9,789.29            | 37,855.60            |
| RHODE ISLAND                      | 38,092.55           | 38,387.90           | 39,379.68           | 38,655.81           | 154,515.93           |
| SOUTH CAROLINA                    | 139,289.57          | 135,695.31          | 141,608.66          | 141,163.81          | 557,757.34           |
| SOUTH DAKOTA                      | 15,798.14           | 14,841.50           | 15,203.28           | 15,328.63           | 61,171.55            |
| TENNESSEE                         | 133,694.24          | 133,302.95          | 137,110.71          | 135,800.52          | 539,908.42           |
| TEXAS                             | 432,137.12          | 436,425.19          | 453,570.03          | 459,055.68          | 1,781,188.02         |
| UTAH                              | 86,977.90           | 87,846.30           | 90,042.90           | 93,821.93           | 358,689.03           |
| VERMONT                           | 10,075.97           | 10,030.16           | 10,158.72           | 10,272.84           | 40,537.69            |
| VIRGIN ISLANDS                    | 308.38              | 333.01              | 348.04              | 335.67              | 1,325.10             |
| VIRGINIA                          | 182,308.82          | 181,772.40          | 185,252.82          | 184,566.91          | 733,900.96           |
| WASHINGTON                        | 112,692.56          | 116,489.87          | 114,444.53          | 118,917.24          | 462,544.20           |
| WEST VIRGINIA                     | 23,523.40           | 23,603.65           | 23,593.42           | 23,708.16           | 94,428.63            |
| WISCONSIN                         | 126,465.87          | 125,370.76          | 125,884.09          | 126,925.65          | 504,646.38           |
| WYOMING                           | 6,870.46            | 6,776.74            | 6,930.96            | 7,044.55            | 27,622.71            |
| <b>1100 - AMPHETAMINE - Total</b> | <b>5,394,514.46</b> | <b>5,424,722.33</b> | <b>5,494,643.85</b> | <b>5,574,521.82</b> | <b>21,888,402.46</b> |

**DRUG: 1105 - METHAMPHETAMINE**

| STATE                | 1ST QUARTER | 2ND QUARTER | 3RD QUARTER | 4TH QUARTER | TOTAL GRAMS |
|----------------------|-------------|-------------|-------------|-------------|-------------|
| ALABAMA              | 30.14       | 33.35       | 34.55       | 37.77       | 135.81      |
| ALASKA               | 2.01        | 2.01        | 3.62        | 0           | 7.63        |
| ARIZONA              | 36.97       | 40.18       | 63.89       | 38.97       | 180.01      |
| ARKANSAS             | 8.84        | 7.23        | 2.41        | 9.64        | 28.13       |
| CALIFORNIA           | 272.41      | 274.01      | 273.20      | 260.34      | 1,079.95    |
| COLORADO             | 56.66       | 59.07       | 63.49       | 56.25       | 235.47      |
| CONNECTICUT          | 24.51       | 24.91       | 20.49       | 26.12       | 96.03       |
| DELAWARE             | 3.21        | 5.63        | 4.42        | 4.42        | 17.68       |
| DISTRICT OF COLUMBIA | 5.22        | 11.65       | 7.23        | 5.62        | 29.73       |
| FLORIDA              | 49.82       | 47.01       | 52.64       | 47.01       | 196.48      |
| GEORGIA              | 24.11       | 16.88       | 22.50       | 25.31       | 88.80       |
| HAWAII               | 5.22        | 4.82        | 4.82        | 7.23        | 22.10       |
| IDAHO                | 15.67       | 12.05       | 14.06       | 13.66       | 55.44       |
| ILLINOIS             | 55.45       | 51.84       | 51.83       | 48.62       | 207.74      |
| INDIANA              | 25.72       | 27.73       | 24.51       | 24.51       | 102.47      |
| IOWA                 | 17.28       | 17.68       | 21.30       | 14.46       | 70.72       |
| KANSAS               | 14.47       | 15.67       | 15.67       | 15.67       | 61.48       |
| KENTUCKY             | 10.85       | 11.65       | 14.06       | 10.45       | 47.01       |
| LOUISIANA            | 15.67       | 15.27       | 15.67       | 13.66       | 60.27       |
| MAINE                | 10.45       | 10.45       | 20.09       | 12.05       | 53.04       |
| MARYLAND             | 36.97       | 33.35       | 38.57       | 45.40       | 154.29      |
| MASSACHUSETTS        | 43.00       | 37.77       | 31.74       | 26.92       | 139.43      |
| MICHIGAN             | 30.54       | 25.31       | 24.51       | 20.89       | 101.26      |

|                                 |                 |                 |                 |                 |                 |
|---------------------------------|-----------------|-----------------|-----------------|-----------------|-----------------|
| MINNESOTA                       | 77.14           | 71.12           | 73.93           | 78.75           | 300.95          |
| MISSISSIPPI                     | 6.43            | 6.03            | 8.44            | 10.04           | 30.94           |
| MISSOURI                        | 27.73           | 44.60           | 41.78           | 58.25           | 172.36          |
| MONTANA                         | 0               | 0.40            | 0               | 0               | 0.40            |
| NEBRASKA                        | 5.22            | 6.03            | 7.63            | 1.21            | 20.09           |
| NEVADA                          | 19.29           | 25.72           | 22.90           | 14.06           | 81.98           |
| NEW HAMPSHIRE                   | 5.63            | 5.22            | 4.82            | 4.02            | 19.69           |
| NEW JERSEY                      | 43.40           | 32.55           | 33.75           | 29.73           | 139.43          |
| NEW MEXICO                      | 4.82            | 3.21            | 6.03            | 8.84            | 22.90           |
| NEW YORK                        | 97.64           | 90.41           | 89.60           | 87.99           | 365.64          |
| NORTH CAROLINA                  | 50.23           | 51.83           | 50.23           | 38.97           | 191.26          |
| NORTH DAKOTA                    | 3.62            | 7.23            | 4.02            | 4.42            | 19.28           |
| OHIO                            | 20.09           | 71.53           | 33.75           | 32.15           | 157.52          |
| OKLAHOMA                        | 16.07           | 12.46           | 15.27           | 10.85           | 54.65           |
| OREGON                          | 39.78           | 27.32           | 34.95           | 40.17           | 142.23          |
| PENNSYLVANIA                    | 122.55          | 124.16          | 108.09          | 126.56          | 481.36          |
| RHODE ISLAND                    | 3.62            | 4.42            | 2.01            | 4.82            | 14.87           |
| SOUTH CAROLINA                  | 16.07           | 19.29           | 14.06           | 23.31           | 72.73           |
| SOUTH DAKOTA                    | 10.85           | 6.83            | 5.63            | 8.03            | 31.34           |
| TENNESSEE                       | 14.47           | 13.26           | 18.08           | 13.26           | 59.07           |
| TEXAS                           | 106.88          | 108.49          | 103.66          | 105.27          | 424.31          |
| UTAH                            | 28.93           | 23.71           | 21.70           | 20.09           | 94.43           |
| VERMONT                         | 2.01            | 1.21            | 2.81            | 2.41            | 8.44            |
| VIRGINIA                        | 34.96           | 28.93           | 32.95           | 29.33           | 126.17          |
| WASHINGTON                      | 92.02           | 93.63           | 90.00           | 77.94           | 353.59          |
| WEST VIRGINIA                   | 4.82            | 3.62            | 3.21            | 6.83            | 18.48           |
| WISCONSIN                       | 32.14           | 35.76           | 35.36           | 34.95           | 138.21          |
| WYOMING                         | 4.82            | 3.62            | 5.22            | 4.82            | 18.48           |
| <b>1105 - METHAMPHETAMINE -</b> | <b>1,686.41</b> | <b>1,708.10</b> | <b>1,695.18</b> | <b>1,642.07</b> | <b>6,731.76</b> |

**DRUG: 1205 - LISDEXAMFETAMINE**

| STATE                | 1ST QUARTER | 2ND QUARTER | 3RD QUARTER | 4TH QUARTER | TOTAL GRAMS |
|----------------------|-------------|-------------|-------------|-------------|-------------|
| ALABAMA              | 72,123.93   | 69,118.13   | 70,050.78   | 72,556.75   | 283,849.59  |
| ALASKA               | 2,562.72    | 2,630.36    | 2,740.19    | 2,695.10    | 10,628.37   |
| ARIZONA              | 38,400.29   | 41,600.65   | 48,559.82   | 40,465.84   | 169,026.61  |
| ARKANSAS             | 30,656.30   | 28,890.06   | 28,698.50   | 29,708.18   | 117,953.04  |
| CALIFORNIA           | 112,339.92  | 112,485.61  | 110,815.58  | 116,614.45  | 452,255.56  |
| COLORADO             | 28,951.83   | 28,504.38   | 28,739.66   | 30,308.05   | 116,503.91  |
| CONNECTICUT          | 36,169.40   | 36,193.68   | 35,273.35   | 37,166.63   | 144,803.07  |
| DELAWARE             | 14,356.54   | 13,805.61   | 13,252.94   | 14,334.57   | 55,749.65   |
| DISTRICT OF COLUMBIA | 5,532.42    | 5,735.33    | 5,554.38    | 5,786.20    | 22,608.33   |

ARCOS 3 - REPORT 02 by GRAMS  
RETAIL DRUG DISTRIBUTION BY STATE WITHIN DRUG CODE

|                |            |            |            |            |              |
|----------------|------------|------------|------------|------------|--------------|
| FLORIDA        | 138,767.77 | 133,537.99 | 128,723.45 | 140,070.45 | 541,099.66   |
| GEORGIA        | 100,588.82 | 95,591.18  | 96,744.25  | 99,001.36  | 391,925.61   |
| GUAM           | 9.25       | 18.50      | 8.67       | 7.52       | 43.94        |
| HAWAII         | 1,452.19   | 1,582.26   | 1,573.01   | 1,507.68   | 6,115.14     |
| IDAHO          | 9,651.96   | 9,595.88   | 9,329.38   | 10,012.11  | 38,589.33    |
| ILLINOIS       | 71,443.91  | 71,857.83  | 71,109.77  | 74,655.83  | 289,067.34   |
| INDIANA        | 85,840.33  | 81,939.32  | 81,501.12  | 84,682.40  | 333,963.17   |
| IOWA           | 34,637.44  | 34,215.43  | 33,062.70  | 34,930.54  | 136,846.10   |
| KANSAS         | 31,682.77  | 31,863.72  | 31,166.53  | 33,139.58  | 127,852.60   |
| KENTUCKY       | 42,106.49  | 40,397.62  | 40,230.79  | 41,066.46  | 163,801.36   |
| LOUISIANA      | 90,976.44  | 87,437.36  | 87,415.08  | 90,414.84  | 356,243.72   |
| MAINE          | 16,908.85  | 16,845.26  | 16,438.27  | 16,795.54  | 66,987.92    |
| MARYLAND       | 56,495.81  | 57,306.97  | 54,140.71  | 58,491.00  | 226,434.49   |
| MASSACHUSETTS  | 36,835.38  | 37,767.27  | 36,205.25  | 39,647.25  | 150,455.15   |
| MICHIGAN       | 61,743.97  | 60,558.49  | 58,509.50  | 63,991.62  | 244,803.58   |
| MINNESOTA      | 30,854.35  | 30,869.38  | 30,182.02  | 32,355.68  | 124,261.44   |
| MISSISSIPPI    | 39,409.66  | 36,095.99  | 36,796.64  | 37,321.56  | 149,623.84   |
| MISSOURI       | 65,805.12  | 63,269.40  | 62,838.31  | 76,370.48  | 268,283.32   |
| MONTANA        | 6,157.34   | 5,952.70   | 6,096.06   | 6,433.10   | 24,639.20    |
| NEBRASKA       | 17,319.15  | 16,736.10  | 17,063.94  | 18,331.38  | 69,450.56    |
| NEVADA         | 7,995.86   | 7,875.63   | 7,723.47   | 7,886.44   | 31,481.41    |
| NEW HAMPSHIRE  | 13,841.45  | 14,374.46  | 13,759.36  | 14,562.92  | 56,538.18    |
| NEW JERSEY     | 48,479.93  | 49,337.40  | 46,962.10  | 49,997.07  | 194,776.49   |
| NEW MEXICO     | 4,145.56   | 3,690.59   | 3,864.60   | 3,977.91   | 15,678.65    |
| NEW YORK       | 86,529.15  | 87,894.32  | 83,500.76  | 90,616.00  | 348,540.24   |
| NORTH CAROLINA | 107,240.44 | 104,919.37 | 99,882.38  | 111,037.40 | 423,079.59   |
| NORTH DAKOTA   | 6,038.83   | 5,649.19   | 5,725.50   | 6,108.78   | 23,522.31    |
| OHIO           | 109,273.88 | 100,450.21 | 92,434.78  | 98,111.14  | 400,270.01   |
| OKLAHOMA       | 38,073.52  | 36,397.88  | 36,120.95  | 38,071.56  | 148,663.91   |
| OREGON         | 15,509.27  | 15,870.09  | 15,413.88  | 15,945.15  | 62,738.39    |
| PENNSYLVANIA   | 88,934.33  | 89,087.52  | 86,022.44  | 91,627.69  | 355,671.98   |
| PUERTO RICO    | 2,270.20   | 2,042.43   | 1,992.71   | 2,172.50   | 8,477.84     |
| RHODE ISLAND   | 7,395.06   | 7,403.15   | 7,167.28   | 7,492.75   | 29,458.24    |
| SOUTH CAROLINA | 61,834.65  | 60,357.57  | 58,239.07  | 62,860.86  | 243,292.14   |
| SOUTH DAKOTA   | 10,579.23  | 10,189.59  | 9,770.47   | 10,443.95  | 40,983.24    |
| TENNESSEE      | 68,950.48  | 66,341.86  | 65,924.39  | 68,314.63  | 269,531.35   |
| TEXAS          | 272,010.78 | 262,408.59 | 257,910.38 | 272,618.33 | 1,064,948.09 |
| UTAH           | 22,578.56  | 22,089.45  | 21,898.79  | 23,710.32  | 90,277.12    |
| VERMONT        | 7,231.45   | 7,107.16   | 6,995.59   | 7,368.46   | 28,702.67    |
| VIRGIN ISLANDS | 70.53      | 58.97      | 80.36      | 67.64      | 277.49       |

|                                  |                     |                     |                     |                     |                     |
|----------------------------------|---------------------|---------------------|---------------------|---------------------|---------------------|
| VIRGINIA                         | 67,860.17           | 66,442.17           | 64,874.90           | 69,065.29           | 268,242.53          |
| WASHINGTON                       | 35,036.73           | 35,734.76           | 34,641.37           | 37,186.34           | 142,599.20          |
| WEST VIRGINIA                    | 19,119.50           | 18,848.37           | 17,940.18           | 19,243.21           | 75,151.27           |
| WISCONSIN                        | 72,286.20           | 72,258.45           | 71,146.19           | 76,018.99           | 291,709.84          |
| WYOMING                          | 2,750.60            | 2,647.70            | 2,486.41            | 2,633.82            | 10,518.53           |
| <b>1205 - LISDEXAMFETAMINE -</b> | <b>2,455,816.67</b> | <b>2,401,879.32</b> | <b>2,355,298.97</b> | <b>2,496,001.33</b> | <b>9,708,996.30</b> |

**DRUG: 1724 - METHYLPHENIDATE (DL;D;L;ISOMERS)**

| STATE                | 1ST QUARTER | 2ND QUARTER | 3RD QUARTER | 4TH QUARTER | TOTAL GRAMS  |
|----------------------|-------------|-------------|-------------|-------------|--------------|
| ALABAMA              | 73,954.47   | 67,629.75   | 67,718.28   | 71,802.60   | 281,105.10   |
| ALASKA               | 8,236.69    | 8,011.60    | 7,459.48    | 8,286.37    | 31,994.14    |
| AMERICAN SAMOA       | 12.97       | 7.78        | 6.92        | 16.43       | 44.10        |
| ARIZONA              | 77,304.46   | 82,216.33   | 94,718.85   | 76,779.75   | 331,019.40   |
| ARKANSAS             | 39,785.47   | 37,383.60   | 36,914.01   | 38,137.82   | 152,220.89   |
| CALIFORNIA           | 268,922.66  | 263,072.88  | 245,924.94  | 264,375.09  | 1,042,295.57 |
| COLORADO             | 62,927.66   | 60,547.88   | 58,822.20   | 62,726.88   | 245,024.63   |
| CONNECTICUT          | 58,262.20   | 54,993.48   | 50,379.41   | 54,485.01   | 218,120.11   |
| DELAWARE             | 18,553.13   | 17,466.85   | 16,661.60   | 17,816.85   | 70,498.43    |
| DISTRICT OF COLUMBIA | 8,490.85    | 7,763.08    | 7,340.67    | 8,046.73    | 31,641.33    |
| FLORIDA              | 209,254.86  | 197,980.76  | 184,626.22  | 193,019.84  | 784,881.68   |
| GEORGIA              | 167,815.59  | 150,931.34  | 152,737.31  | 159,353.22  | 630,837.46   |
| GUAM                 | 404.01      | 477.07      | 675.57      | 428.08      | 1,984.74     |
| HAWAII               | 11,227.21   | 10,823.48   | 11,014.27   | 10,683.77   | 43,748.73    |
| IDAHO                | 28,691.29   | 27,986.90   | 26,288.20   | 27,501.42   | 110,467.80   |
| ILLINOIS             | 173,329.01  | 164,316.41  | 157,083.11  | 168,351.34  | 663,079.86   |
| INDIANA              | 120,590.42  | 113,821.67  | 109,218.78  | 114,266.85  | 457,897.73   |
| IOWA                 | 81,724.04   | 80,095.38   | 75,296.80   | 79,857.27   | 316,973.49   |
| KANSAS               | 49,155.41   | 48,312.66   | 46,037.33   | 49,753.01   | 193,258.41   |
| KENTUCKY             | 76,769.40   | 70,662.09   | 70,582.99   | 72,879.85   | 290,894.33   |
| LOUISIANA            | 86,052.29   | 77,650.93   | 77,108.30   | 85,027.56   | 325,839.09   |
| MAINE                | 36,018.64   | 35,549.13   | 33,511.13   | 33,426.83   | 138,505.73   |
| MARYLAND             | 101,577.01  | 99,931.99   | 89,718.61   | 97,356.66   | 388,584.27   |
| MASSACHUSETTS        | 146,426.72  | 143,662.81  | 129,424.98  | 142,116.33  | 561,630.85   |
| MICHIGAN             | 188,466.09  | 179,211.28  | 166,223.22  | 178,149.49  | 712,050.08   |
| MINNESOTA            | 103,660.03  | 98,883.75   | 94,073.07   | 102,086.78  | 398,703.63   |
| MISSISSIPPI          | 42,505.17   | 39,683.90   | 40,091.23   | 42,642.84   | 164,923.13   |
| MISSOURI             | 123,539.76  | 121,203.09  | 121,659.82  | 148,942.62  | 515,345.28   |
| MONTANA              | 17,912.93   | 16,945.32   | 15,852.89   | 16,972.77   | 67,683.91    |
| NEBRASKA             | 31,178.63   | 29,875.99   | 29,465.08   | 31,109.35   | 121,629.05   |
| NEVADA               | 14,970.31   | 14,279.54   | 14,408.94   | 14,557.37   | 58,216.16    |
| NEW HAMPSHIRE        | 33,912.80   | 34,077.66   | 31,849.73   | 33,123.67   | 132,963.86   |



|                                  |                     |                     |                     |                     |                      |
|----------------------------------|---------------------|---------------------|---------------------|---------------------|----------------------|
| NEW JERSEY                       | 92,399.11           | 91,074.92           | 81,589.86           | 90,439.94           | 355,503.83           |
| NEW MEXICO                       | 19,346.00           | 17,761.48           | 17,259.56           | 18,074.75           | 72,441.79            |
| NEW YORK                         | 231,770.97          | 231,423.99          | 207,622.54          | 226,850.77          | 897,668.27           |
| NORTH CAROLINA                   | 193,329.00          | 181,622.18          | 163,836.01          | 182,231.37          | 721,018.56           |
| NORTH DAKOTA                     | 15,661.85           | 14,816.96           | 14,297.70           | 15,483.09           | 60,259.60            |
| OHIO                             | 223,286.55          | 206,612.44          | 183,164.36          | 199,316.48          | 812,379.83           |
| OKLAHOMA                         | 50,133.42           | 45,323.93           | 44,368.37           | 46,713.07           | 186,538.79           |
| OREGON                           | 61,940.45           | 62,899.40           | 58,891.81           | 62,070.04           | 245,801.71           |
| PENNSYLVANIA                     | 225,860.97          | 219,876.07          | 205,477.41          | 219,873.88          | 871,088.33           |
| PUERTO RICO                      | 15,201.86           | 14,619.82           | 13,373.30           | 14,194.99           | 57,389.98            |
| RHODE ISLAND                     | 19,259.60           | 18,695.05           | 16,735.99           | 17,847.06           | 72,537.70            |
| SOUTH CAROLINA                   | 89,615.93           | 84,394.62           | 79,721.60           | 86,314.11           | 340,046.25           |
| SOUTH DAKOTA                     | 22,043.10           | 19,277.23           | 19,977.33           | 20,400.21           | 81,697.86            |
| TENNESSEE                        | 83,708.72           | 78,659.73           | 77,707.66           | 81,088.40           | 321,164.51           |
| TEXAS                            | 335,585.23          | 321,501.38          | 295,348.98          | 331,196.25          | 1,283,631.84         |
| UTAH                             | 47,173.78           | 45,120.91           | 43,905.93           | 47,503.23           | 183,703.86           |
| VERMONT                          | 19,113.46           | 18,889.50           | 17,964.74           | 18,957.69           | 74,925.40            |
| VIRGIN ISLANDS                   | 135.03              | 159.83              | 132.68              | 158.62              | 586.16               |
| VIRGINIA                         | 135,949.94          | 131,084.77          | 123,784.72          | 129,736.33          | 520,555.76           |
| WASHINGTON                       | 114,614.62          | 114,297.71          | 105,303.23          | 113,412.05          | 447,627.62           |
| WEST VIRGINIA                    | 32,337.10           | 30,539.97           | 28,472.70           | 29,392.91           | 120,742.68           |
| WISCONSIN                        | 109,059.24          | 100,475.74          | 96,366.22           | 103,108.32          | 409,009.53           |
| WYOMING                          | 7,817.34            | 7,546.33            | 7,028.17            | 7,895.84            | 30,287.69            |
| <b>1724 - METHYLPHENIDATE (D</b> | <b>4,606,975.47</b> | <b>4,412,130.36</b> | <b>4,165,224.79</b> | <b>4,466,339.90</b> | <b>17,650,670.52</b> |

**DRUG: 9050 - CODEINE**

| STATE                | 1ST QUARTER | 2ND QUARTER | 3RD QUARTER | 4TH QUARTER | TOTAL GRAMS  |
|----------------------|-------------|-------------|-------------|-------------|--------------|
| ALABAMA              | 54,727.52   | 48,860.49   | 49,149.79   | 48,867.23   | 201,605.04   |
| ALASKA               | 6,246.24    | 6,092.57    | 6,095.09    | 5,135.85    | 23,569.75    |
| AMERICAN SAMOA       | 190.07      | 353.62      | 181.23      | 335.94      | 1,060.85     |
| ARIZONA              | 67,250.60   | 57,385.77   | 57,667.06   | 54,979.04   | 237,282.47   |
| ARKANSAS             | 67,887.27   | 60,785.00   | 58,982.89   | 54,092.64   | 241,747.80   |
| CALIFORNIA           | 430,883.25  | 403,723.32  | 399,591.36  | 370,959.56  | 1,605,157.49 |
| COLORADO             | 24,603.70   | 21,420.62   | 20,764.32   | 17,943.44   | 84,732.08    |
| CONNECTICUT          | 20,352.91   | 20,383.90   | 19,023.12   | 18,720.29   | 78,480.23    |
| DELAWARE             | 8,417.06    | 8,170.89    | 7,638.85    | 7,722.29    | 31,949.10    |
| DISTRICT OF COLUMBIA | 11,055.64   | 10,557.62   | 10,837.50   | 9,011.16    | 41,461.92    |
| FLORIDA              | 170,848.17  | 152,311.43  | 140,653.09  | 136,684.76  | 600,497.44   |
| GEORGIA              | 102,881.63  | 92,009.82   | 88,385.31   | 82,651.93   | 365,928.70   |
| GUAM                 | 930.91      | 1,022.54    | 961.07      | 684.38      | 3,598.89     |
| HAWAII               | 12,322.06   | 12,007.05   | 11,505.00   | 10,590.95   | 46,425.06    |

ARCOS 3 - REPORT 02 by GRAMS  
RETAIL DRUG DISTRIBUTION BY STATE WITHIN DRUG CODE

|                |            |            |            |            |              |
|----------------|------------|------------|------------|------------|--------------|
| IDAHO          | 13,103.49  | 10,988.15  | 12,406.29  | 12,195.92  | 48,693.85    |
| ILLINOIS       | 147,393.89 | 141,391.15 | 143,244.27 | 137,326.15 | 569,355.47   |
| INDIANA        | 48,350.18  | 44,169.55  | 41,342.85  | 40,841.85  | 174,704.43   |
| IOWA           | 18,778.90  | 16,624.91  | 19,371.99  | 16,065.61  | 70,841.41    |
| KANSAS         | 26,476.68  | 23,172.33  | 24,761.49  | 21,299.76  | 95,710.26    |
| KENTUCKY       | 46,514.79  | 42,349.15  | 41,033.17  | 38,283.05  | 168,180.16   |
| LOUISIANA      | 40,578.13  | 38,011.36  | 37,740.26  | 36,539.36  | 152,869.10   |
| MAINE          | 9,685.35   | 8,521.93   | 8,993.59   | 8,231.37   | 35,432.24    |
| MARYLAND       | 51,471.18  | 51,729.40  | 46,250.02  | 46,646.09  | 196,096.69   |
| MASSACHUSETTS  | 41,180.01  | 42,153.20  | 37,803.57  | 39,831.35  | 160,968.12   |
| MICHIGAN       | 229,114.90 | 209,125.64 | 190,561.36 | 181,192.81 | 809,994.72   |
| MINNESOTA      | 34,477.21  | 31,322.14  | 32,261.78  | 31,158.43  | 129,219.55   |
| MISSISSIPPI    | 26,473.27  | 22,707.65  | 22,463.40  | 21,002.91  | 92,647.22    |
| MISSOURI       | 62,564.48  | 58,635.55  | 63,647.09  | 58,233.03  | 243,080.15   |
| MONTANA        | 9,307.13   | 8,630.81   | 9,399.30   | 8,199.65   | 35,536.89    |
| NEBRASKA       | 11,220.79  | 9,908.30   | 10,436.56  | 9,635.11   | 41,200.75    |
| NEVADA         | 21,456.72  | 20,182.65  | 19,476.62  | 17,679.12  | 78,795.10    |
| NEW HAMPSHIRE  | 6,959.61   | 6,642.68   | 6,536.66   | 6,238.14   | 26,377.09    |
| NEW JERSEY     | 69,550.53  | 70,103.54  | 64,841.12  | 65,631.62  | 270,126.81   |
| NEW MEXICO     | 18,715.14  | 15,001.65  | 16,773.51  | 15,516.60  | 66,006.90    |
| NEW YORK       | 128,965.32 | 129,191.83 | 121,237.90 | 118,201.43 | 497,596.48   |
| NORTH CAROLINA | 45,817.43  | 40,303.60  | 36,979.98  | 40,160.23  | 163,261.25   |
| NORTH DAKOTA   | 5,075.13   | 4,819.25   | 4,361.26   | 4,519.80   | 18,775.44    |
| OHIO           | 87,921.76  | 79,899.41  | 74,466.66  | 65,268.02  | 307,555.84   |
| OKLAHOMA       | 91,443.31  | 87,585.78  | 87,457.44  | 81,609.29  | 348,095.81   |
| OREGON         | 33,296.35  | 30,218.54  | 30,357.15  | 27,913.79  | 121,785.82   |
| PENNSYLVANIA   | 116,920.14 | 114,526.52 | 107,715.57 | 105,507.30 | 444,669.53   |
| PUERTO RICO    | 11,488.10  | 12,406.40  | 12,334.57  | 10,670.36  | 46,899.43    |
| RHODE ISLAND   | 6,187.34   | 6,162.52   | 5,228.73   | 5,434.65   | 23,013.23    |
| SOUTH CAROLINA | 73,303.29  | 71,961.54  | 72,879.51  | 62,830.54  | 280,974.88   |
| SOUTH DAKOTA   | 5,955.53   | 5,509.88   | 5,969.95   | 5,414.47   | 22,849.83    |
| TENNESSEE      | 74,435.49  | 66,341.46  | 70,446.16  | 57,737.07  | 268,960.19   |
| TEXAS          | 929,061.13 | 950,677.88 | 903,428.79 | 877,951.82 | 3,661,119.62 |
| UTAH           | 16,879.56  | 13,938.22  | 14,122.46  | 13,897.58  | 58,837.81    |
| VERMONT        | 2,703.50   | 2,846.79   | 2,691.26   | 2,645.41   | 10,886.96    |
| VIRGIN ISLANDS | 634.30     | 834.39     | 457.64     | 852.07     | 2,778.39     |
| VIRGINIA       | 50,351.99  | 45,915.13  | 45,132.92  | 43,161.77  | 184,561.82   |
| WASHINGTON     | 57,193.39  | 53,917.21  | 53,802.13  | 49,912.10  | 214,824.84   |
| WEST VIRGINIA  | 34,811.79  | 35,809.87  | 36,200.31  | 36,483.29  | 143,305.26   |
| WISCONSIN      | 44,288.96  | 41,748.88  | 41,797.83  | 40,326.02  | 168,161.69   |

|                               |                     |                     |                     |                     |                      |
|-------------------------------|---------------------|---------------------|---------------------|---------------------|----------------------|
| WYOMING                       | 4,052.12            | 3,370.81            | 3,692.82            | 3,214.50            | 14,330.25            |
| <b>9050 - CODEINE - Total</b> | <b>3,732,755.34</b> | <b>3,564,442.25</b> | <b>3,451,541.66</b> | <b>3,283,838.88</b> | <b>14,032,578.12</b> |

**DRUG: 9064 - BUPRENORPHINE**

| STATE                | 1ST QUARTER | 2ND QUARTER | 3RD QUARTER | 4TH QUARTER | TOTAL GRAMS |
|----------------------|-------------|-------------|-------------|-------------|-------------|
| ALABAMA              | 26,918.25   | 28,660.45   | 29,452.35   | 30,617.09   | 115,648.15  |
| ALASKA               | 2,583.83    | 2,670.28    | 2,643.71    | 2,666.55    | 10,564.38   |
| AMERICAN SAMOA       | 0.02        | 0.00        | 0.02        | 0           | 0.04        |
| ARIZONA              | 10,007.42   | 10,879.74   | 11,625.98   | 12,533.59   | 45,046.72   |
| ARKANSAS             | 6,565.61    | 7,249.03    | 7,486.34    | 7,773.26    | 29,074.25   |
| CALIFORNIA           | 40,133.32   | 41,842.59   | 43,966.11   | 46,057.94   | 171,999.96  |
| COLORADO             | 8,035.07    | 8,515.86    | 8,917.11    | 9,735.21    | 35,203.25   |
| CONNECTICUT          | 15,509.93   | 16,278.45   | 16,070.59   | 17,229.21   | 65,088.17   |
| DELAWARE             | 3,751.34    | 4,063.38    | 3,967.31    | 4,123.57    | 15,905.60   |
| DISTRICT OF COLUMBIA | 2,751.34    | 2,730.72    | 2,848.24    | 3,259.01    | 11,589.32   |
| FLORIDA              | 49,002.40   | 51,589.45   | 52,741.76   | 54,784.49   | 208,118.09  |
| GEORGIA              | 16,149.07   | 17,121.52   | 17,456.56   | 18,422.76   | 69,149.91   |
| GUAM                 | 0.62        | 0.25        | 1.44        | 0.00        | 2.31        |
| HAWAII               | 2,041.12    | 2,082.06    | 2,181.28    | 2,290.04    | 8,594.50    |
| IDAHO                | 3,886.57    | 4,186.43    | 4,269.21    | 4,530.59    | 16,872.80   |
| ILLINOIS             | 15,599.99   | 16,614.32   | 16,829.01   | 17,806.76   | 66,850.09   |
| INDIANA              | 21,635.49   | 23,911.83   | 24,978.36   | 27,081.35   | 97,607.04   |
| IOWA                 | 1,907.67    | 2,010.56    | 2,118.01    | 2,224.01    | 8,260.26    |
| KANSAS               | 2,569.61    | 2,800.55    | 2,844.81    | 3,053.53    | 11,268.50   |
| KENTUCKY             | 36,959.27   | 37,462.35   | 39,565.39   | 41,642.84   | 155,629.85  |
| LOUISIANA            | 19,910.96   | 21,105.86   | 21,617.02   | 21,992.64   | 84,626.49   |
| MAINE                | 10,449.02   | 10,912.25   | 11,527.59   | 11,989.83   | 44,878.69   |
| MARYLAND             | 27,322.15   | 28,629.16   | 29,185.85   | 30,846.33   | 115,983.50  |
| MASSACHUSETTS        | 42,192.92   | 43,945.72   | 43,378.87   | 45,894.00   | 175,411.51  |
| MICHIGAN             | 29,132.39   | 30,463.40   | 30,465.10   | 32,095.43   | 122,156.32  |
| MINNESOTA            | 8,345.50    | 8,877.01    | 9,170.37    | 9,820.01    | 36,212.90   |
| MISSISSIPPI          | 10,270.14   | 10,719.39   | 10,840.57   | 11,030.58   | 42,860.68   |
| MISSOURI             | 11,439.92   | 12,576.15   | 13,971.52   | 15,652.20   | 53,639.78   |
| MONTANA              | 2,855.90    | 2,890.90    | 3,074.04    | 3,338.87    | 12,159.72   |
| NEBRASKA             | 1,404.90    | 1,469.22    | 1,474.66    | 1,615.10    | 5,963.88    |
| NEVADA               | 3,582.79    | 3,713.55    | 3,869.14    | 4,125.46    | 15,290.93   |
| NEW HAMPSHIRE        | 8,220.05    | 8,826.04    | 8,554.03    | 9,245.38    | 34,845.51   |
| NEW JERSEY           | 26,519.91   | 27,922.84   | 27,291.06   | 29,333.86   | 111,067.66  |
| NEW MEXICO           | 7,874.81    | 8,467.29    | 8,861.26    | 8,992.19    | 34,195.54   |
| NEW YORK             | 57,407.42   | 60,751.72   | 61,082.71   | 65,035.79   | 244,277.64  |
| NORTH CAROLINA       | 36,103.10   | 39,887.55   | 39,797.09   | 44,237.14   | 160,024.88  |

|                                   |                   |                   |                   |                     |                     |
|-----------------------------------|-------------------|-------------------|-------------------|---------------------|---------------------|
| NORTH DAKOTA                      | 1,026.66          | 1,135.30          | 1,230.55          | 1,260.77            | 4,653.28            |
| OHIO                              | 53,934.23         | 56,053.09         | 56,004.55         | 59,381.94           | 225,373.82          |
| OKLAHOMA                          | 12,373.07         | 13,358.80         | 14,210.69         | 15,527.70           | 55,470.25           |
| OREGON                            | 11,143.00         | 11,899.75         | 12,401.45         | 13,730.44           | 49,174.65           |
| PENNSYLVANIA                      | 67,466.98         | 72,494.54         | 72,171.09         | 77,817.54           | 289,950.16          |
| PUERTO RICO                       | 2,133.98          | 2,091.02          | 2,122.69          | 2,153.44            | 8,501.12            |
| RHODE ISLAND                      | 8,115.64          | 7,874.54          | 8,076.51          | 8,625.05            | 32,691.74           |
| SOUTH CAROLINA                    | 11,568.36         | 12,559.14         | 12,939.38         | 13,951.06           | 51,017.95           |
| SOUTH DAKOTA                      | 490.66            | 549.82            | 617.71            | 646.75              | 2,304.93            |
| TENNESSEE                         | 36,381.11         | 38,614.26         | 39,109.16         | 39,662.88           | 153,767.41          |
| TEXAS                             | 27,121.43         | 28,189.29         | 29,088.64         | 29,952.95           | 114,352.32          |
| UTAH                              | 9,746.20          | 10,153.49         | 10,562.84         | 11,112.60           | 41,575.13           |
| VERMONT                           | 6,608.52          | 6,593.44          | 6,829.31          | 7,133.34            | 27,164.61           |
| VIRGIN ISLANDS                    | 12.94             | 10.37             | 14.07             | 11.75               | 49.12               |
| VIRGINIA                          | 20,310.90         | 21,426.59         | 22,004.24         | 22,844.71           | 86,586.44           |
| WASHINGTON                        | 21,663.59         | 23,455.86         | 24,200.06         | 26,604.94           | 95,924.45           |
| WEST VIRGINIA                     | 15,735.89         | 15,752.44         | 16,216.90         | 16,839.75           | 64,544.98           |
| WISCONSIN                         | 11,198.91         | 11,807.91         | 12,217.23         | 12,891.11           | 48,115.17           |
| WYOMING                           | 1,374.63          | 1,304.91          | 1,303.33          | 1,374.12            | 5,357.00            |
| <b>9064 - BUPRENORPHINE - Tot</b> | <b>887,446.54</b> | <b>937,152.47</b> | <b>955,444.87</b> | <b>1,012,599.44</b> | <b>3,792,643.31</b> |

**DRUG: 9143 - OXYCODONE**

| STATE                | 1ST QUARTER | 2ND QUARTER | 3RD QUARTER | 4TH QUARTER | TOTAL GRAMS  |
|----------------------|-------------|-------------|-------------|-------------|--------------|
| ALABAMA              | 210,629.35  | 201,743.36  | 193,062.48  | 189,534.46  | 794,969.65   |
| ALASKA               | 31,438.15   | 31,229.99   | 30,260.70   | 27,163.11   | 120,091.96   |
| AMERICAN SAMOA       | 10.76       | 6.72        | 6.72        | 12.55       | 36.76        |
| ARIZONA              | 373,301.70  | 348,072.07  | 336,321.51  | 324,662.57  | 1,382,357.85 |
| ARKANSAS             | 125,960.79  | 119,531.64  | 110,436.59  | 102,994.62  | 458,923.65   |
| CALIFORNIA           | 763,936.38  | 737,439.87  | 703,627.93  | 679,236.91  | 2,884,241.08 |
| COLORADO             | 199,651.44  | 190,667.68  | 186,163.83  | 183,234.65  | 759,717.61   |
| CONNECTICUT          | 146,495.48  | 143,349.53  | 140,044.07  | 139,055.60  | 568,944.68   |
| DELAWARE             | 61,588.18   | 61,672.80   | 60,458.28   | 58,741.07   | 242,460.33   |
| DISTRICT OF COLUMBIA | 12,979.79   | 12,593.56   | 12,058.04   | 11,999.97   | 49,631.36    |
| FLORIDA              | 995,706.65  | 958,397.59  | 872,843.15  | 867,553.82  | 3,694,501.21 |
| GEORGIA              | 412,269.59  | 398,770.38  | 386,106.36  | 382,417.75  | 1,579,564.08 |
| GUAM                 | 931.05      | 680.17      | 856.25      | 678.37      | 3,145.83     |
| HAWAII               | 39,005.21   | 38,418.29   | 36,044.62   | 34,475.17   | 147,943.28   |
| IDAHO                | 56,161.93   | 53,237.95   | 52,122.67   | 51,402.97   | 212,925.53   |
| ILLINOIS             | 142,655.20  | 135,850.40  | 130,737.24  | 129,759.85  | 539,002.68   |
| INDIANA              | 212,331.25  | 200,478.12  | 192,314.74  | 191,547.00  | 796,671.10   |
| IOWA                 | 46,977.54   | 44,656.56   | 43,356.50   | 42,787.09   | 177,777.69   |

|                                 |                      |                      |                      |                     |                      |
|---------------------------------|----------------------|----------------------|----------------------|---------------------|----------------------|
| KANSAS                          | 110,087.19           | 106,511.16           | 102,142.72           | 102,675.44          | 421,416.52           |
| KENTUCKY                        | 193,979.66           | 187,350.73           | 179,825.04           | 178,043.55          | 739,198.98           |
| LOUISIANA                       | 173,603.85           | 164,248.94           | 161,115.66           | 157,736.64          | 656,705.08           |
| MAINE                           | 47,337.06            | 45,409.21            | 44,515.35            | 43,066.75           | 180,328.38           |
| MARYLAND                        | 288,231.97           | 275,843.20           | 266,273.79           | 261,013.12          | 1,091,362.08         |
| MASSACHUSETTS                   | 216,666.74           | 208,958.42           | 199,528.24           | 199,489.45          | 824,642.85           |
| MICHIGAN                        | 259,927.45           | 240,113.62           | 226,675.36           | 218,614.77          | 945,331.20           |
| MINNESOTA                       | 127,009.73           | 122,176.79           | 117,721.14           | 114,620.63          | 481,528.29           |
| MISSISSIPPI                     | 93,605.99            | 90,352.67            | 88,566.38            | 85,650.06           | 358,175.10           |
| MISSOURI                        | 258,296.60           | 242,528.32           | 230,202.63           | 223,879.23          | 954,906.78           |
| MONTANA                         | 33,658.91            | 31,379.60            | 30,191.39            | 29,624.77           | 124,854.68           |
| NEBRASKA                        | 37,375.11            | 36,474.80            | 34,953.72            | 34,857.29           | 143,660.91           |
| NEVADA                          | 157,950.42           | 148,534.39           | 145,322.13           | 143,137.06          | 594,943.99           |
| NEW HAMPSHIRE                   | 55,486.03            | 52,863.35            | 49,944.98            | 48,419.02           | 206,713.38           |
| NEW JERSEY                      | 425,629.00           | 410,878.28           | 396,870.77           | 390,457.85          | 1,623,835.91         |
| NEW MEXICO                      | 80,887.52            | 78,628.00            | 76,680.20            | 74,927.37           | 311,123.09           |
| NEW YORK                        | 645,711.48           | 632,609.94           | 605,937.90           | 590,760.57          | 2,475,019.89         |
| NORTH CAROLINA                  | 499,442.28           | 475,993.43           | 464,556.21           | 486,500.56          | 1,926,492.48         |
| NORTH DAKOTA                    | 13,142.28            | 12,688.48            | 12,613.37            | 12,387.71           | 50,831.84            |
| OHIO                            | 412,495.88           | 397,258.59           | 381,837.49           | 377,921.46          | 1,569,513.43         |
| OKLAHOMA                        | 202,163.26           | 192,260.83           | 179,586.69           | 160,577.83          | 734,588.62           |
| OREGON                          | 153,589.77           | 149,504.19           | 143,480.99           | 139,203.81          | 585,778.76           |
| PENNSYLVANIA                    | 649,267.48           | 626,004.85           | 599,154.66           | 579,431.92          | 2,453,858.91         |
| PUERTO RICO                     | 7,404.73             | 7,900.07             | 14,706.77            | 14,319.35           | 44,330.91            |
| RHODE ISLAND                    | 35,867.26            | 33,747.94            | 32,075.72            | 32,230.97           | 133,921.89           |
| SOUTH CAROLINA                  | 206,811.28           | 194,772.35           | 187,949.15           | 184,781.57          | 774,314.35           |
| SOUTH DAKOTA                    | 15,216.32            | 14,487.66            | 13,740.82            | 13,196.71           | 56,641.51            |
| TENNESSEE                       | 420,991.18           | 409,408.99           | 390,639.81           | 377,835.40          | 1,598,875.37         |
| TEXAS                           | 307,917.35           | 303,863.86           | 290,350.34           | 289,225.01          | 1,191,356.55         |
| UTAH                            | 152,995.93           | 147,169.53           | 144,332.30           | 142,207.06          | 586,704.81           |
| VERMONT                         | 20,841.53            | 20,024.13            | 19,332.64            | 18,819.96           | 79,018.26            |
| VIRGIN ISLANDS                  | 463.94               | 480.43               | 394.91               | 413.29              | 1,752.57             |
| VIRGINIA                        | 262,524.42           | 252,823.97           | 245,546.79           | 244,297.29          | 1,005,192.47         |
| WASHINGTON                      | 258,217.13           | 251,409.19           | 242,441.87           | 237,674.43          | 989,742.63           |
| WEST VIRGINIA                   | 72,248.71            | 67,470.52            | 63,782.46            | 60,832.77           | 264,334.46           |
| WISCONSIN                       | 179,675.85           | 167,586.32           | 158,632.67           | 152,817.21          | 658,712.06           |
| WYOMING                         | 23,960.77            | 22,862.52            | 21,962.93            | 22,119.24           | 90,905.46            |
| <b>9143 - OXYCODONE - Total</b> | <b>10,932,712.46</b> | <b>10,499,375.98</b> | <b>10,050,407.68</b> | <b>9,861,024.63</b> | <b>41,343,520.76</b> |

**DRUG: 9150 - HYDROMORPHONE**

| STATE | 1ST QUARTER | 2ND QUARTER | 3RD QUARTER | 4TH QUARTER | TOTAL GRAMS |
|-------|-------------|-------------|-------------|-------------|-------------|
|-------|-------------|-------------|-------------|-------------|-------------|

ARCOS 3 - REPORT 02 by GRAMS  
RETAIL DRUG DISTRIBUTION BY STATE WITHIN DRUG CODE

|                      |           |           |           |           |            |
|----------------------|-----------|-----------|-----------|-----------|------------|
| ALABAMA              | 2,777.32  | 2,821.82  | 2,597.38  | 2,344.97  | 10,541.50  |
| ALASKA               | 958.18    | 756.91    | 766.25    | 622.01    | 3,103.34   |
| AMERICAN SAMOA       | 0.18      | 0.03      | 0.73      | 0.27      | 1.20       |
| ARIZONA              | 6,148.90  | 5,588.13  | 5,425.76  | 5,056.22  | 22,219.02  |
| ARKANSAS             | 2,811.12  | 2,540.91  | 2,365.32  | 2,280.16  | 9,997.50   |
| CALIFORNIA           | 34,764.05 | 32,674.26 | 30,038.86 | 28,453.83 | 125,931.00 |
| COLORADO             | 6,507.54  | 5,834.45  | 5,637.52  | 5,598.57  | 23,578.07  |
| CONNECTICUT          | 5,894.59  | 5,059.17  | 4,690.61  | 4,711.11  | 20,355.47  |
| DELAWARE             | 1,814.54  | 1,653.44  | 1,520.48  | 1,483.92  | 6,472.38   |
| DISTRICT OF COLUMBIA | 459.71    | 374.60    | 452.30    | 407.02    | 1,693.63   |
| FLORIDA              | 43,752.23 | 39,490.32 | 37,156.97 | 35,121.31 | 155,520.83 |
| GEORGIA              | 7,211.99  | 7,267.29  | 6,576.09  | 6,006.85  | 27,062.23  |
| GUAM                 | 28.28     | 17.21     | 30.71     | 14.31     | 90.51      |
| HAWAII               | 546.70    | 528.30    | 492.28    | 494.18    | 2,061.45   |
| IDAHO                | 1,863.65  | 1,872.51  | 1,665.87  | 1,615.81  | 7,017.83   |
| ILLINOIS             | 8,894.40  | 8,245.46  | 7,790.86  | 7,597.06  | 32,527.78  |
| INDIANA              | 5,431.52  | 4,987.37  | 4,495.20  | 4,248.44  | 19,162.53  |
| IOWA                 | 2,622.86  | 2,404.82  | 2,276.33  | 2,275.32  | 9,579.33   |
| KANSAS               | 2,957.25  | 2,800.73  | 2,891.40  | 2,734.53  | 11,383.91  |
| KENTUCKY             | 2,545.12  | 2,425.27  | 2,176.57  | 2,314.77  | 9,461.73   |
| LOUISIANA            | 2,941.03  | 2,830.54  | 2,700.56  | 2,399.95  | 10,872.08  |
| MAINE                | 1,623.13  | 1,520.84  | 1,235.11  | 1,442.22  | 5,821.30   |
| MARYLAND             | 7,211.98  | 6,395.81  | 6,248.74  | 6,069.43  | 25,925.96  |
| MASSACHUSETTS        | 6,889.07  | 6,893.72  | 6,182.28  | 5,929.01  | 25,894.08  |
| MICHIGAN             | 7,654.53  | 7,504.48  | 6,470.61  | 6,276.27  | 27,905.89  |
| MINNESOTA            | 5,348.87  | 5,036.82  | 4,984.49  | 4,864.83  | 20,235.00  |
| MISSISSIPPI          | 4,497.39  | 6,250.99  | 5,389.31  | 4,448.85  | 20,586.53  |
| MISSOURI             | 5,806.27  | 5,035.62  | 4,687.94  | 4,701.49  | 20,231.31  |
| MONTANA              | 1,621.56  | 1,343.70  | 1,358.48  | 1,289.40  | 5,613.14   |
| NEBRASKA             | 1,083.90  | 1,082.98  | 1,087.07  | 1,058.86  | 4,312.82   |
| NEVADA               | 2,501.58  | 2,199.70  | 2,311.65  | 2,242.03  | 9,254.96   |
| NEW HAMPSHIRE        | 1,747.28  | 1,738.34  | 1,513.86  | 1,595.28  | 6,594.75   |
| NEW JERSEY           | 7,823.25  | 7,158.03  | 7,293.09  | 7,137.84  | 29,412.21  |
| NEW MEXICO           | 1,147.70  | 1,123.91  | 1,163.79  | 1,065.66  | 4,501.06   |
| NEW YORK             | 17,341.51 | 16,824.83 | 16,013.10 | 15,247.83 | 65,427.26  |
| NORTH CAROLINA       | 9,705.96  | 8,762.82  | 9,334.90  | 8,588.70  | 36,392.38  |
| NORTH DAKOTA         | 556.87    | 545.90    | 619.05    | 650.92    | 2,372.74   |
| OHIO                 | 8,787.42  | 7,491.97  | 6,852.60  | 6,954.14  | 30,086.13  |
| OKLAHOMA             | 3,366.51  | 3,224.82  | 3,171.93  | 2,737.57  | 12,500.83  |
| OREGON               | 4,482.13  | 4,096.43  | 3,763.84  | 3,759.19  | 16,101.59  |

|                                 |                   |                   |                   |                   |                     |
|---------------------------------|-------------------|-------------------|-------------------|-------------------|---------------------|
| PENNSYLVANIA                    | 14,685.90         | 12,754.69         | 11,093.41         | 11,035.38         | 49,569.38           |
| PUERTO RICO                     | 51.25             | 66.63             | 55.59             | 56.21             | 229.67              |
| RHODE ISLAND                    | 818.83            | 741.16            | 619.82            | 568.97            | 2,748.77            |
| SOUTH CAROLINA                  | 5,082.66          | 4,980.02          | 4,943.20          | 4,415.74          | 19,421.63           |
| SOUTH DAKOTA                    | 525.80            | 473.70            | 487.04            | 491.78            | 1,978.32            |
| TENNESSEE                       | 7,665.65          | 4,505.69          | 4,949.97          | 4,870.43          | 21,991.74           |
| TEXAS                           | 21,871.45         | 19,438.77         | 18,945.69         | 18,809.33         | 79,065.23           |
| UTAH                            | 2,812.04          | 2,145.52          | 2,436.83          | 2,274.81          | 9,669.19            |
| VERMONT                         | 1,075.22          | 1,087.44          | 915.83            | 919.98            | 3,998.48            |
| VIRGIN ISLANDS                  | 10.86             | 13.30             | 16.31             | 13.83             | 54.30               |
| VIRGINIA                        | 9,794.87          | 9,103.35          | 8,605.45          | 8,259.04          | 35,762.70           |
| WASHINGTON                      | 9,715.50          | 8,942.94          | 8,294.23          | 8,333.80          | 35,286.47           |
| WEST VIRGINIA                   | 1,181.25          | 1,118.00          | 1,040.79          | 1,083.81          | 4,423.85            |
| WISCONSIN                       | 3,553.35          | 3,265.46          | 2,801.07          | 2,631.38          | 12,251.25           |
| WYOMING                         | 562.03            | 564.22            | 484.48            | 494.00            | 2,104.73            |
| <b>9150 - HYDROMORPHONE - T</b> | <b>319,534.72</b> | <b>293,606.14</b> | <b>277,119.57</b> | <b>266,098.58</b> | <b>1,156,359.01</b> |

**DRUG: 9193 - HYDROCODONE**

| STATE                | 1ST QUARTER | 2ND QUARTER | 3RD QUARTER | 4TH QUARTER | TOTAL GRAMS  |
|----------------------|-------------|-------------|-------------|-------------|--------------|
| ALABAMA              | 223,350.03  | 214,775.33  | 208,606.42  | 207,257.90  | 853,989.67   |
| ALASKA               | 9,821.57    | 9,428.58    | 9,025.03    | 8,645.58    | 36,920.76    |
| AMERICAN SAMOA       | 3.63        | 0           | 0           | 0           | 3.63         |
| ARIZONA              | 93,520.55   | 87,191.66   | 84,740.02   | 83,257.51   | 348,709.74   |
| ARKANSAS             | 120,863.63  | 115,245.93  | 110,625.47  | 108,391.02  | 455,126.05   |
| CALIFORNIA           | 829,002.43  | 794,554.06  | 765,824.97  | 744,489.33  | 3,133,870.80 |
| COLORADO             | 57,984.06   | 54,840.98   | 52,655.47   | 52,169.59   | 217,650.10   |
| CONNECTICUT          | 18,121.90   | 16,761.16   | 16,219.30   | 16,341.67   | 67,444.03    |
| DELAWARE             | 5,173.97    | 5,134.33    | 4,907.42    | 4,846.62    | 20,062.33    |
| DISTRICT OF COLUMBIA | 1,357.64    | 1,111.33    | 1,078.02    | 1,054.99    | 4,601.98     |
| FLORIDA              | 340,174.90  | 315,391.99  | 272,012.56  | 274,878.25  | 1,202,457.69 |
| GEORGIA              | 222,576.16  | 212,955.19  | 203,461.01  | 203,844.55  | 842,836.92   |
| GUAM                 | 142.59      | 101.24      | 135.95      | 116.67      | 496.46       |
| HAWAII               | 16,304.36   | 15,570.55   | 14,406.04   | 14,130.27   | 60,411.22    |
| IDAHO                | 52,198.65   | 50,964.65   | 49,377.82   | 48,523.97   | 201,065.09   |
| ILLINOIS             | 270,801.21  | 260,368.88  | 249,086.69  | 249,810.82  | 1,030,067.59 |
| INDIANA              | 206,161.32  | 196,794.99  | 190,035.80  | 190,528.67  | 783,520.77   |
| IOWA                 | 50,377.92   | 48,258.00   | 46,358.03   | 46,248.30   | 191,242.24   |
| KANSAS               | 73,086.15   | 70,405.26   | 67,549.43   | 67,357.62   | 278,398.45   |
| KENTUCKY             | 188,090.96  | 181,063.43  | 175,781.57  | 176,604.80  | 721,540.77   |
| LOUISIANA            | 147,202.74  | 139,768.31  | 136,208.86  | 135,670.52  | 558,850.42   |
| MAINE                | 15,783.98   | 15,162.34   | 14,935.32   | 14,503.53   | 60,385.18    |

|                                   |                     |                     |                     |                     |                      |
|-----------------------------------|---------------------|---------------------|---------------------|---------------------|----------------------|
| MARYLAND                          | 30,255.29           | 29,123.57           | 27,148.09           | 27,305.54           | 113,832.50           |
| MASSACHUSETTS                     | 27,253.25           | 25,824.79           | 24,353.43           | 24,403.47           | 101,834.93           |
| MICHIGAN                          | 337,224.55          | 310,827.19          | 290,132.27          | 286,669.65          | 1,224,853.66         |
| MINNESOTA                         | 39,382.77           | 37,705.28           | 36,496.62           | 35,635.09           | 149,219.75           |
| MISSISSIPPI                       | 99,033.75           | 92,247.24           | 88,024.95           | 84,755.11           | 364,061.06           |
| MISSOURI                          | 155,287.75          | 149,092.02          | 143,085.79          | 139,967.05          | 587,432.60           |
| MONTANA                           | 23,745.27           | 22,603.24           | 22,357.05           | 21,691.01           | 90,396.57            |
| NEBRASKA                          | 28,370.64           | 27,735.66           | 26,386.85           | 26,283.41           | 108,776.55           |
| NEVADA                            | 79,174.96           | 75,840.66           | 73,797.14           | 72,250.39           | 301,063.15           |
| NEW HAMPSHIRE                     | 8,242.23            | 7,695.72            | 7,596.49            | 7,601.84            | 31,136.29            |
| NEW JERSEY                        | 30,508.96           | 28,534.89           | 27,110.18           | 27,632.20           | 113,786.23           |
| NEW MEXICO                        | 32,325.82           | 30,425.51           | 29,465.17           | 29,582.97           | 121,799.47           |
| NEW YORK                          | 152,317.93          | 146,483.73          | 140,092.49          | 139,946.35          | 578,840.51           |
| NORTH CAROLINA                    | 168,254.03          | 155,800.03          | 149,714.73          | 157,410.94          | 631,179.73           |
| NORTH DAKOTA                      | 9,339.72            | 8,806.86            | 8,845.41            | 8,519.22            | 35,511.20            |
| OHIO                              | 157,411.53          | 149,228.23          | 142,261.15          | 142,196.74          | 591,097.65           |
| OKLAHOMA                          | 162,726.57          | 160,068.20          | 152,244.49          | 142,189.44          | 617,228.70           |
| OREGON                            | 84,601.82           | 82,331.60           | 79,591.55           | 77,665.00           | 324,189.97           |
| PENNSYLVANIA                      | 143,359.13          | 136,422.73          | 131,936.33          | 125,853.23          | 537,571.41           |
| PUERTO RICO                       | 373.47              | 344.81              | 607.07              | 515.30              | 1,840.64             |
| RHODE ISLAND                      | 9,143.16            | 8,676.78            | 8,357.67            | 8,171.79            | 34,349.40            |
| SOUTH CAROLINA                    | 122,888.18          | 114,977.41          | 109,329.62          | 109,172.04          | 456,367.25           |
| SOUTH DAKOTA                      | 12,535.57           | 12,046.69           | 11,670.25           | 11,579.41           | 47,831.94            |
| TENNESSEE                         | 221,430.15          | 211,711.96          | 199,865.59          | 193,334.02          | 826,341.72           |
| TEXAS                             | 605,701.53          | 588,559.11          | 570,469.31          | 566,616.51          | 2,331,346.46         |
| UTAH                              | 53,125.77           | 50,733.38           | 49,110.06           | 49,779.60           | 202,748.82           |
| VERMONT                           | 4,264.10            | 4,136.47            | 4,029.43            | 3,983.52            | 16,413.53            |
| VIRGIN ISLANDS                    | 285.51              | 221.22              | 224.79              | 237.30              | 968.81               |
| VIRGINIA                          | 91,044.29           | 85,273.72           | 81,645.52           | 82,572.85           | 340,536.39           |
| WASHINGTON                        | 117,086.98          | 114,056.54          | 109,543.49          | 108,280.60          | 448,967.62           |
| WEST VIRGINIA                     | 50,828.80           | 47,139.71           | 44,517.22           | 42,653.89           | 185,139.63           |
| WISCONSIN                         | 68,829.82           | 68,036.57           | 66,592.22           | 65,749.46           | 269,208.06           |
| WYOMING                           | 10,040.15           | 9,857.33            | 9,520.81            | 9,448.06            | 38,866.35            |
| <b>9193 - HYDROCODONE - Total</b> | <b>6,078,493.82</b> | <b>5,798,417.00</b> | <b>5,539,154.44</b> | <b>5,478,325.20</b> | <b>22,894,390.46</b> |

**DRUG: 9230 - MEPERIDINE (PETHIDINE)**

| STATE    | 1ST QUARTER | 2ND QUARTER | 3RD QUARTER | 4TH QUARTER | TOTAL GRAMS |
|----------|-------------|-------------|-------------|-------------|-------------|
| ALABAMA  | 7,902.52    | 6,944.66    | 5,860.51    | 4,517.64    | 25,225.33   |
| ALASKA   | 667.13      | 446.97      | 387.82      | 294.13      | 1,796.05    |
| ARIZONA  | 5,388.22    | 4,960.67    | 4,439.57    | 3,574.52    | 18,362.98   |
| ARKANSAS | 6,752.29    | 6,028.95    | 5,547.97    | 4,315.56    | 22,644.77   |



ARCOS 3 - REPORT 02 by GRAMS  
RETAIL DRUG DISTRIBUTION BY STATE WITHIN DRUG CODE

|                      |           |           |           |           |           |
|----------------------|-----------|-----------|-----------|-----------|-----------|
| CALIFORNIA           | 19,967.05 | 17,676.42 | 13,247.78 | 11,149.21 | 62,040.45 |
| COLORADO             | 1,603.56  | 1,571.53  | 1,373.70  | 1,141.12  | 5,689.91  |
| CONNECTICUT          | 1,101.58  | 885.12    | 872.04    | 836.10    | 3,694.83  |
| DELAWARE             | 223.76    | 106.76    | 97.50     | 132.36    | 560.37    |
| DISTRICT OF COLUMBIA | 144.34    | 164.50    | 130.18    | 196.63    | 635.65    |
| FLORIDA              | 9,635.85  | 8,329.25  | 6,493.87  | 5,474.11  | 29,933.08 |
| GEORGIA              | 10,270.61 | 9,466.97  | 7,629.96  | 6,092.33  | 33,459.87 |
| GUAM                 | 14.16     | 35.95     | 40.85     | 29.96     | 120.92    |
| HAWAII               | 247.18    | 402.31    | 352.41    | 232.58    | 1,234.48  |
| IDAHO                | 741.86    | 777.81    | 573.56    | 694.48    | 2,787.71  |
| ILLINOIS             | 2,818.00  | 2,819.13  | 2,214.05  | 1,761.52  | 9,612.69  |
| INDIANA              | 3,147.55  | 3,060.03  | 2,697.07  | 1,839.95  | 10,744.61 |
| IOWA                 | 1,861.18  | 1,890.26  | 1,295.27  | 1,540.92  | 6,587.62  |
| KANSAS               | 1,544.43  | 1,511.94  | 1,367.14  | 999.50    | 5,423.02  |
| KENTUCKY             | 2,837.89  | 2,412.77  | 1,810.43  | 1,487.54  | 8,548.63  |
| LOUISIANA            | 6,966.31  | 6,489.23  | 5,148.39  | 3,969.14  | 22,573.07 |
| MAINE                | 353.18    | 334.87    | 317.01    | 308.29    | 1,313.35  |
| MARYLAND             | 2,217.20  | 2,167.86  | 1,726.66  | 1,586.67  | 7,698.40  |
| MASSACHUSETTS        | 2,097.53  | 1,793.33  | 1,573.60  | 1,503.34  | 6,967.80  |
| MICHIGAN             | 2,889.87  | 2,544.78  | 1,838.76  | 2,087.24  | 9,360.65  |
| MINNESOTA            | 586.35    | 681.62    | 423.77    | 459.72    | 2,151.45  |
| MISSISSIPPI          | 3,927.52  | 3,715.31  | 3,206.10  | 2,613.96  | 13,462.89 |
| MISSOURI             | 3,289.04  | 3,094.59  | 2,481.60  | 2,449.46  | 11,314.68 |
| MONTANA              | 644.26    | 576.82    | 488.04    | 325.18    | 2,034.30  |
| NEBRASKA             | 596.63    | 474.97    | 439.02    | 425.95    | 1,936.56  |
| NEVADA               | 1,704.98  | 1,392.22  | 1,055.60  | 960.28    | 5,113.09  |
| NEW HAMPSHIRE        | 644.58    | 573.77    | 473.88    | 496.76    | 2,188.99  |
| NEW JERSEY           | 1,795.51  | 1,654.87  | 1,495.17  | 1,324.68  | 6,270.22  |
| NEW MEXICO           | 1,607.59  | 1,484.82  | 1,197.77  | 805.05    | 5,095.22  |
| NEW YORK             | 4,827.94  | 4,303.49  | 3,532.54  | 3,059.51  | 15,723.47 |
| NORTH CAROLINA       | 5,045.88  | 4,810.14  | 4,147.25  | 3,752.90  | 17,756.16 |
| NORTH DAKOTA         | 179.96    | 160.68    | 220.05    | 192.27    | 752.98    |
| OHIO                 | 5,518.43  | 4,305.41  | 3,333.24  | 3,437.85  | 16,594.92 |
| OKLAHOMA             | 6,752.27  | 5,548.27  | 5,178.02  | 3,795.38  | 21,273.95 |
| OREGON               | 1,199.84  | 1,299.30  | 1,179.25  | 892.20    | 4,570.58  |
| PENNSYLVANIA         | 3,532.84  | 3,199.30  | 2,626.16  | 2,367.76  | 11,726.05 |
| PUERTO RICO          | 2,446.19  | 2,223.96  | 4,236.03  | 3,576.42  | 12,482.60 |
| RHODE ISLAND         | 177.02    | 226.05    | 170.49    | 84.43     | 657.98    |
| SOUTH CAROLINA       | 5,134.33  | 4,541.93  | 4,171.76  | 3,417.91  | 17,265.94 |
| SOUTH DAKOTA         | 531.83    | 594.80    | 426.49    | 330.08    | 1,883.20  |

ARCOS 3 - REPORT 02 by GRAMS  
RETAIL DRUG DISTRIBUTION BY STATE WITHIN DRUG CODE

|                                     |                   |                   |                   |                   |                   |
|-------------------------------------|-------------------|-------------------|-------------------|-------------------|-------------------|
| TENNESSEE                           | 7,323.50          | 6,149.50          | 4,890.47          | 3,700.06          | 22,063.53         |
| TEXAS                               | 13,536.92         | 11,614.55         | 8,532.90          | 8,180.78          | 41,865.15         |
| UTAH                                | 1,710.30          | 1,870.98          | 1,379.69          | 1,372.07          | 6,333.04          |
| VERMONT                             | 354.26            | 301.76            | 178.11            | 222.23            | 1,056.37          |
| VIRGIN ISLANDS                      | 120.92            | 155.78            | 153.06            | 30.50             | 460.26            |
| VIRGINIA                            | 5,716.82          | 4,908.61          | 4,299.55          | 3,873.82          | 18,798.80         |
| WASHINGTON                          | 3,258.76          | 3,289.91          | 2,478.87          | 2,378.85          | 11,406.39         |
| WEST VIRGINIA                       | 715.07            | 567.02            | 384.55            | 315.92            | 1,982.55          |
| WISCONSIN                           | 1,245.09          | 1,229.25          | 811.04            | 748.51            | 4,033.89          |
| WYOMING                             | 333.57            | 306.66            | 311.02            | 302.30            | 1,253.54          |
| <b>9230 - MEPERIDINE (PETHIDIN)</b> | <b>175,851.45</b> | <b>158,078.40</b> | <b>130,937.57</b> | <b>111,657.62</b> | <b>576,525.04</b> |

**DRUG: 9250B - METHADONE**

| STATE                | 1ST QUARTER | 2ND QUARTER | 3RD QUARTER | 4TH QUARTER | TOTAL GRAMS  |
|----------------------|-------------|-------------|-------------|-------------|--------------|
| ALABAMA              | 67,914.39   | 69,271.28   | 74,008.47   | 75,231.20   | 286,425.34   |
| ALASKA               | 8,238.68    | 7,954.26    | 8,965.11    | 7,825.55    | 32,983.59    |
| ARIZONA              | 88,198.78   | 89,203.34   | 92,125.79   | 83,463.26   | 352,991.18   |
| ARKANSAS             | 14,846.06   | 13,578.07   | 13,616.35   | 11,647.06   | 53,687.52    |
| CALIFORNIA           | 331,722.38  | 302,980.16  | 321,055.74  | 254,097.99  | 1,209,856.28 |
| COLORADO             | 46,411.33   | 44,774.62   | 47,146.83   | 41,701.36   | 180,034.13   |
| CONNECTICUT          | 107,551.69  | 109,740.38  | 116,112.17  | 83,539.91   | 416,944.15   |
| DELAWARE             | 31,389.68   | 34,835.99   | 29,406.53   | 29,282.39   | 124,914.59   |
| DISTRICT OF COLUMBIA | 9,332.62    | 8,677.16    | 10,387.32   | 7,014.74    | 35,411.84    |
| FLORIDA              | 200,019.40  | 166,679.70  | 190,663.49  | 197,667.47  | 755,030.06   |
| GEORGIA              | 122,050.06  | 104,200.73  | 114,804.38  | 108,179.74  | 449,234.91   |
| GUAM                 | 42.48       | 43.83       | 33.54       | 43.38       | 163.23       |
| HAWAII               | 8,313.54    | 4,974.47    | 8,226.42    | 6,380.56    | 27,894.99    |
| IDAHO                | 11,799.28   | 9,857.63    | 9,894.48    | 9,912.90    | 41,464.29    |
| ILLINOIS             | 125,160.28  | 112,978.85  | 127,254.80  | 110,315.45  | 475,709.38   |
| INDIANA              | 81,066.00   | 75,972.04   | 78,136.57   | 65,149.51   | 300,324.12   |
| IOWA                 | 12,463.11   | 13,115.57   | 12,500.49   | 11,083.76   | 49,162.93    |
| KANSAS               | 20,576.30   | 22,621.97   | 19,432.18   | 20,870.64   | 83,501.09    |
| KENTUCKY             | 51,235.42   | 49,948.97   | 51,201.01   | 46,731.41   | 199,116.82   |
| LOUISIANA            | 36,114.62   | 34,816.49   | 34,747.14   | 32,616.66   | 138,294.90   |
| MAINE                | 30,810.56   | 23,344.11   | 29,830.57   | 22,332.99   | 106,318.22   |
| MARYLAND             | 187,662.74  | 169,950.86  | 183,860.20  | 174,663.05  | 716,136.84   |
| MASSACHUSETTS        | 143,650.94  | 122,803.21  | 142,285.19  | 110,055.87  | 518,795.21   |
| MICHIGAN             | 126,586.59  | 127,702.82  | 124,251.80  | 111,233.13  | 489,774.33   |
| MINNESOTA            | 54,848.36   | 58,420.51   | 56,338.61   | 49,485.09   | 219,092.58   |
| MISSISSIPPI          | 6,999.66    | 8,246.46    | 6,561.05    | 7,536.39    | 29,343.56    |
| MISSOURI             | 37,084.11   | 40,492.97   | 35,838.54   | 33,652.49   | 147,068.11   |

|                                  |                     |                     |                     |                     |                      |
|----------------------------------|---------------------|---------------------|---------------------|---------------------|----------------------|
| MONTANA                          | 7,566.09            | 7,976.97            | 8,481.95            | 7,994.68            | 32,019.70            |
| NEBRASKA                         | 7,147.88            | 6,484.31            | 7,933.06            | 6,788.64            | 28,353.89            |
| NEVADA                           | 35,907.66           | 33,437.86           | 33,811.18           | 33,410.49           | 136,567.19           |
| NEW HAMPSHIRE                    | 32,094.29           | 31,195.69           | 29,474.59           | 27,105.24           | 119,869.81           |
| NEW JERSEY                       | 115,335.74          | 115,657.90          | 121,387.88          | 116,133.73          | 468,515.25           |
| NEW MEXICO                       | 41,766.60           | 41,948.97           | 45,821.81           | 41,949.06           | 171,486.44           |
| NEW YORK                         | 294,396.67          | 281,438.64          | 314,167.06          | 236,617.55          | 1,126,619.92         |
| NORTH CAROLINA                   | 135,804.74          | 120,461.28          | 132,661.89          | 118,923.54          | 507,851.46           |
| NORTH DAKOTA                     | 3,176.01            | 3,691.73            | 4,734.51            | 4,271.74            | 15,873.99            |
| OHIO                             | 71,507.63           | 72,826.19           | 73,272.85           | 76,329.93           | 293,936.59           |
| OKLAHOMA                         | 37,086.83           | 29,873.14           | 36,593.21           | 33,923.79           | 137,476.97           |
| OREGON                           | 63,684.08           | 53,428.02           | 59,842.24           | 50,559.90           | 227,514.24           |
| PENNSYLVANIA                     | 189,494.72          | 177,324.20          | 187,040.52          | 160,229.35          | 714,088.79           |
| PUERTO RICO                      | 20,410.21           | 21,561.03           | 21,747.78           | 23,116.13           | 86,835.15            |
| RHODE ISLAND                     | 44,271.82           | 47,642.63           | 37,124.84           | 40,111.69           | 169,150.99           |
| SOUTH CAROLINA                   | 53,998.77           | 48,942.28           | 53,881.97           | 42,239.02           | 199,062.05           |
| SOUTH DAKOTA                     | 2,018.57            | 1,994.24            | 2,056.76            | 1,521.28            | 7,590.86             |
| TENNESSEE                        | 50,004.04           | 46,174.12           | 51,184.43           | 45,597.37           | 192,959.96           |
| TEXAS                            | 137,248.00          | 122,242.73          | 136,911.97          | 122,241.36          | 518,644.06           |
| UTAH                             | 28,138.63           | 23,347.86           | 26,338.92           | 19,698.00           | 97,523.41            |
| VERMONT                          | 20,084.56           | 15,595.74           | 19,629.75           | 16,592.01           | 71,902.07            |
| VIRGIN ISLANDS                   | 1.79                | 3.58                | 9.84                | 549.16              | 564.37               |
| VIRGINIA                         | 82,987.04           | 79,210.03           | 82,578.70           | 73,548.15           | 318,323.92           |
| WASHINGTON                       | 98,377.83           | 83,780.68           | 100,870.97          | 88,459.38           | 371,488.86           |
| WEST VIRGINIA                    | 22,711.05           | 20,161.65           | 23,336.60           | 16,959.61           | 83,168.91            |
| WISCONSIN                        | 61,515.58           | 58,426.59           | 63,141.16           | 43,882.77           | 226,966.10           |
| WYOMING                          | 1,048.51            | 931.79              | 877.85              | 899.32              | 3,757.46             |
| <b>9250B - METHADONE - Total</b> | <b>3,619,874.42</b> | <b>3,372,946.30</b> | <b>3,613,599.05</b> | <b>3,161,366.86</b> | <b>13,767,786.63</b> |

**DRUG: 9300 - MORPHINE**

| STATE                | 1ST QUARTER | 2ND QUARTER | 3RD QUARTER | 4TH QUARTER | TOTAL GRAMS  |
|----------------------|-------------|-------------|-------------|-------------|--------------|
| ALABAMA              | 63,749.51   | 60,512.68   | 58,188.90   | 57,865.49   | 240,316.58   |
| ALASKA               | 10,799.45   | 10,484.39   | 10,339.16   | 9,116.76    | 40,739.77    |
| AMERICAN SAMOA       | 6.77        | 25.12       | 12.18       | 4.51        | 48.58        |
| ARIZONA              | 136,741.78  | 124,647.12  | 116,910.22  | 109,003.06  | 487,302.18   |
| ARKANSAS             | 38,902.44   | 36,091.73   | 33,140.85   | 31,681.30   | 139,816.32   |
| CALIFORNIA           | 400,101.55  | 375,284.98  | 358,109.62  | 346,526.82  | 1,480,022.97 |
| COLORADO             | 69,466.35   | 64,253.88   | 62,531.80   | 58,950.62   | 255,202.66   |
| CONNECTICUT          | 32,848.85   | 31,359.24   | 29,731.85   | 29,190.94   | 123,130.87   |
| DELAWARE             | 20,025.57   | 18,686.12   | 17,524.99   | 16,591.38   | 72,828.05    |
| DISTRICT OF COLUMBIA | 3,687.93    | 2,729.65    | 2,989.20    | 2,468.92    | 11,875.70    |

|                |            |            |            |            |              |
|----------------|------------|------------|------------|------------|--------------|
| FLORIDA        | 371,027.93 | 354,851.78 | 324,461.45 | 315,983.33 | 1,366,324.49 |
| GEORGIA        | 104,805.28 | 100,634.05 | 97,872.74  | 93,268.52  | 396,580.59   |
| GUAM           | 1,005.28   | 826.94     | 769.30     | 765.17     | 3,366.70     |
| HAWAII         | 18,510.58  | 18,782.17  | 16,999.40  | 15,850.51  | 70,142.67    |
| IDAHO          | 25,649.58  | 24,931.66  | 23,975.83  | 22,447.40  | 97,004.47    |
| ILLINOIS       | 95,172.42  | 91,349.37  | 88,023.10  | 87,900.76  | 362,445.64   |
| INDIANA        | 77,338.11  | 73,243.52  | 68,387.78  | 66,713.35  | 285,682.76   |
| IOWA           | 30,578.58  | 28,933.47  | 28,213.55  | 27,756.04  | 115,481.64   |
| KANSAS         | 40,474.30  | 38,914.39  | 36,659.84  | 35,896.64  | 151,945.16   |
| KENTUCKY       | 41,830.87  | 39,716.11  | 36,993.42  | 37,129.80  | 155,670.20   |
| LOUISIANA      | 48,758.22  | 46,908.85  | 45,631.68  | 43,460.65  | 184,759.40   |
| MAINE          | 14,733.01  | 14,368.48  | 13,774.44  | 13,576.37  | 56,452.30    |
| MARYLAND       | 67,378.01  | 63,123.40  | 57,757.50  | 55,306.46  | 243,565.36   |
| MASSACHUSETTS  | 60,858.52  | 59,079.46  | 55,457.37  | 55,592.24  | 230,987.59   |
| MICHIGAN       | 162,164.04 | 153,747.08 | 143,755.19 | 137,861.48 | 597,527.79   |
| MINNESOTA      | 41,305.71  | 39,159.05  | 37,999.77  | 36,494.43  | 154,958.95   |
| MISSISSIPPI    | 34,949.52  | 34,124.33  | 32,540.47  | 30,135.07  | 131,749.38   |
| MISSOURI       | 87,169.18  | 80,507.38  | 77,773.94  | 75,452.35  | 320,902.84   |
| MONTANA        | 15,968.41  | 15,248.43  | 14,889.61  | 13,126.17  | 59,232.61    |
| NEBRASKA       | 17,332.34  | 17,450.26  | 16,432.67  | 15,968.73  | 67,184.01    |
| NEVADA         | 50,722.85  | 46,904.66  | 45,937.64  | 42,535.32  | 186,100.47   |
| NEW HAMPSHIRE  | 17,005.38  | 17,093.23  | 15,634.32  | 15,646.56  | 65,379.49    |
| NEW JERSEY     | 75,167.59  | 72,347.77  | 68,387.60  | 67,329.10  | 283,232.06   |
| NEW MEXICO     | 23,027.43  | 21,464.48  | 20,622.48  | 20,854.45  | 85,968.84    |
| NEW YORK       | 140,144.76 | 135,583.64 | 130,043.41 | 125,383.84 | 531,155.65   |
| NORTH CAROLINA | 109,970.87 | 105,123.85 | 102,634.74 | 105,486.56 | 423,216.02   |
| NORTH DAKOTA   | 5,671.92   | 5,247.94   | 5,351.00   | 5,256.95   | 21,527.80    |
| OHIO           | 106,426.38 | 100,381.39 | 94,072.11  | 94,625.23  | 395,505.12   |
| OKLAHOMA       | 81,175.79  | 72,989.07  | 67,481.79  | 57,897.39  | 279,544.04   |
| OREGON         | 62,402.85  | 60,189.39  | 58,414.56  | 55,845.49  | 236,852.29   |
| PENNSYLVANIA   | 209,332.61 | 188,562.77 | 200,179.40 | 163,353.02 | 761,427.79   |
| PUERTO RICO    | 1,431.29   | 1,345.34   | 2,004.96   | 2,053.46   | 6,835.05     |
| RHODE ISLAND   | 10,361.99  | 9,491.94   | 8,808.37   | 9,277.45   | 37,939.75    |
| SOUTH CAROLINA | 60,751.90  | 58,363.99  | 56,543.60  | 56,332.60  | 231,992.09   |
| SOUTH DAKOTA   | 7,684.52   | 7,236.09   | 7,155.86   | 6,604.44   | 28,680.91    |
| TENNESSEE      | 144,205.13 | 132,195.26 | 135,417.02 | 105,050.14 | 516,867.55   |
| TEXAS          | 189,821.39 | 180,619.18 | 171,628.50 | 165,653.28 | 707,722.35   |
| UTAH           | 45,775.28  | 42,821.91  | 41,841.55  | 40,271.89  | 170,710.63   |
| VERMONT        | 9,584.36   | 9,402.67   | 8,912.58   | 8,836.52   | 36,736.12    |
| VIRGIN ISLANDS | 96.93      | 133.71     | 134.38     | 106.74     | 471.76       |

|                                |                     |                     |                     |                     |                      |
|--------------------------------|---------------------|---------------------|---------------------|---------------------|----------------------|
| VIRGINIA                       | 70,659.02           | 68,828.75           | 65,452.40           | 65,493.94           | 270,434.11           |
| WASHINGTON                     | 96,421.27           | 94,101.65           | 89,444.28           | 85,611.21           | 365,578.40           |
| WEST VIRGINIA                  | 19,014.89           | 18,012.96           | 17,542.76           | 16,684.12           | 71,254.72            |
| WISCONSIN                      | 68,314.02           | 65,798.11           | 61,345.30           | 61,097.36           | 256,554.79           |
| WYOMING                        | 8,347.86            | 7,851.37            | 7,429.48            | 6,858.52            | 30,487.23            |
| <b>9300 - MORPHINE - Total</b> | <b>3,746,858.35</b> | <b>3,542,066.20</b> | <b>3,390,267.87</b> | <b>3,226,230.83</b> | <b>13,905,423.24</b> |

**DRUG: 9652 - OXYMORPHONE**

| STATE                | 1ST QUARTER | 2ND QUARTER | 3RD QUARTER | 4TH QUARTER | TOTAL GRAMS |
|----------------------|-------------|-------------|-------------|-------------|-------------|
| ALABAMA              | 2,384.36    | 2,165.88    | 1,942.82    | 1,958.16    | 8,451.22    |
| ALASKA               | 167.98      | 158.35      | 122.75      | 93.85       | 542.93      |
| ARIZONA              | 2,675.12    | 2,184.17    | 2,093.89    | 1,764.62    | 8,717.81    |
| ARKANSAS             | 710.16      | 531.38      | 431.33      | 368.48      | 2,041.35    |
| CALIFORNIA           | 6,788.93    | 5,780.36    | 5,408.89    | 5,078.37    | 23,056.55   |
| COLORADO             | 1,603.73    | 1,428.48    | 1,312.64    | 1,253.04    | 5,597.88    |
| CONNECTICUT          | 1,435.03    | 1,434.54    | 1,260.63    | 1,243.59    | 5,373.79    |
| DELAWARE             | 1,471.03    | 1,486.82    | 1,464.29    | 1,447.61    | 5,869.75    |
| DISTRICT OF COLUMBIA | 98.22       | 61.02       | 50.58       | 52.05       | 261.88      |
| FLORIDA              | 11,420.80   | 10,640.70   | 9,637.45    | 9,279.13    | 40,978.08   |
| GEORGIA              | 3,200.05    | 2,866.76    | 2,765.06    | 2,577.77    | 11,409.65   |
| HAWAII               | 255.59      | 181.27      | 205.81      | 218.03      | 860.70      |
| IDAHO                | 797.58      | 750.79      | 668.99      | 669.16      | 2,886.52    |
| ILLINOIS             | 2,088.23    | 1,831.70    | 1,745.80    | 1,814.84    | 7,480.57    |
| INDIANA              | 2,503.63    | 2,218.47    | 2,106.60    | 1,942.82    | 8,771.53    |
| IOWA                 | 526.34      | 464.43      | 377.27      | 357.69      | 1,725.72    |
| KANSAS               | 888.49      | 822.87      | 745.48      | 760.87      | 3,217.72    |
| KENTUCKY             | 2,120.79    | 1,907.09    | 1,729.47    | 1,631.70    | 7,389.04    |
| LOUISIANA            | 4,242.25    | 3,983.76    | 3,787.32    | 3,592.71    | 15,606.04   |
| MAINE                | 590.75      | 435.70      | 399.21      | 362.50      | 1,788.17    |
| MARYLAND             | 6,356.89    | 5,901.64    | 5,629.54    | 5,554.96    | 23,443.03   |
| MASSACHUSETTS        | 1,127.70    | 1,035.37    | 991.35      | 968.64      | 4,123.06    |
| MICHIGAN             | 14,344.17   | 12,275.12   | 10,766.44   | 9,271.02    | 46,656.74   |
| MINNESOTA            | 228.29      | 214.46      | 207.32      | 215.35      | 865.43      |
| MISSISSIPPI          | 1,764.44    | 1,451.54    | 1,309.65    | 1,310.27    | 5,835.90    |
| MISSOURI             | 2,020.87    | 1,700.12    | 1,560.77    | 1,630.45    | 6,912.21    |
| MONTANA              | 133.28      | 125.96      | 138.41      | 120.52      | 518.18      |
| NEBRASKA             | 617.82      | 526.34      | 516.75      | 454.03      | 2,114.95    |
| NEVADA               | 1,970.69    | 1,628.39    | 1,542.31    | 1,344.31    | 6,485.70    |
| NEW HAMPSHIRE        | 470.27      | 474.11      | 409.96      | 322.98      | 1,677.33    |
| NEW JERSEY           | 3,737.90    | 3,369.86    | 3,023.95    | 3,023.37    | 13,155.09   |
| NEW MEXICO           | 556.27      | 476.34      | 388.91      | 349.52      | 1,771.04    |

|                                   |                   |                   |                   |                   |                   |
|-----------------------------------|-------------------|-------------------|-------------------|-------------------|-------------------|
| NEW YORK                          | 11,394.53         | 10,639.72         | 9,948.30          | 9,908.29          | 41,890.83         |
| NORTH CAROLINA                    | 11,044.24         | 9,956.72          | 9,390.47          | 9,504.03          | 39,895.46         |
| NORTH DAKOTA                      | 81.94             | 80.82             | 71.28             | 67.00             | 301.04            |
| OHIO                              | 5,204.56          | 4,772.73          | 4,193.45          | 3,815.44          | 17,986.18         |
| OKLAHOMA                          | 2,820.46          | 2,455.28          | 1,827.73          | 1,302.38          | 8,405.86          |
| OREGON                            | 1,041.66          | 949.02            | 870.38            | 836.43            | 3,697.49          |
| PENNSYLVANIA                      | 14,439.75         | 12,775.23         | 11,466.62         | 10,927.65         | 49,609.24         |
| RHODE ISLAND                      | 231.05            | 167.71            | 159.24            | 123.29            | 681.30            |
| SOUTH CAROLINA                    | 3,376.87          | 3,132.88          | 3,017.53          | 2,907.62          | 12,434.89         |
| SOUTH DAKOTA                      | 334.89            | 288.15            | 238.68            | 292.34            | 1,154.07          |
| TENNESSEE                         | 14,167.98         | 12,805.20         | 11,632.76         | 11,258.88         | 49,864.82         |
| TEXAS                             | 5,535.93          | 4,766.22          | 4,201.18          | 3,734.24          | 18,237.57         |
| UTAH                              | 2,983.69          | 2,677.06          | 2,502.47          | 2,516.97          | 10,680.19         |
| VERMONT                           | 169.41            | 127.66            | 120.26            | 139.88            | 557.21            |
| VIRGINIA                          | 6,148.89          | 5,685.98          | 5,245.99          | 5,028.19          | 22,109.05         |
| WASHINGTON                        | 1,637.32          | 1,387.84          | 1,345.60          | 1,353.94          | 5,724.69          |
| WEST VIRGINIA                     | 1,480.13          | 1,376.51          | 1,141.53          | 1,163.66          | 5,161.82          |
| WISCONSIN                         | 1,031.18          | 828.31            | 772.83            | 707.97            | 3,340.29          |
| WYOMING                           | 194.79            | 125.21            | 115.66            | 112.63            | 548.28            |
| <b>9652 - OXYMORPHONE - Total</b> | <b>162,616.91</b> | <b>145,512.07</b> | <b>133,003.60</b> | <b>126,733.24</b> | <b>567,865.82</b> |

**DRUG: 9780 - TAPENTADOL**

| STATE                | 1ST QUARTER | 2ND QUARTER | 3RD QUARTER | 4TH QUARTER | TOTAL GRAMS |
|----------------------|-------------|-------------|-------------|-------------|-------------|
| ALABAMA              | 43,345.50   | 43,372.00   | 40,437.50   | 37,149.00   | 164,304.00  |
| ALASKA               | 2,104.00    | 2,147.50    | 2,113.00    | 1,646.00    | 8,010.50    |
| ARIZONA              | 31,653.50   | 30,951.00   | 28,564.00   | 26,096.00   | 117,264.50  |
| ARKANSAS             | 15,581.50   | 14,373.00   | 13,103.00   | 11,699.50   | 54,757.00   |
| CALIFORNIA           | 85,686.40   | 82,514.43   | 78,783.45   | 76,734.95   | 323,719.23  |
| COLORADO             | 26,747.00   | 25,144.50   | 24,580.50   | 24,762.50   | 101,234.50  |
| CONNECTICUT          | 8,241.00    | 8,894.50    | 8,328.50    | 8,673.50    | 34,137.50   |
| DELAWARE             | 5,531.50    | 5,635.00    | 5,613.00    | 5,125.00    | 21,904.50   |
| DISTRICT OF COLUMBIA | 884.00      | 880.00      | 827.00      | 775.00      | 3,366.00    |
| FLORIDA              | 78,177.00   | 77,431.50   | 68,283.00   | 67,378.00   | 291,269.50  |
| GEORGIA              | 52,107.00   | 52,478.00   | 50,380.50   | 50,074.00   | 205,039.50  |
| HAWAII               | 2,501.00    | 2,031.00    | 1,796.50    | 1,753.50    | 8,082.00    |
| IDAHO                | 5,480.00    | 5,839.50    | 5,597.50    | 4,909.50    | 21,826.50   |
| ILLINOIS             | 29,481.00   | 29,173.00   | 27,531.50   | 27,791.50   | 113,977.00  |
| INDIANA              | 31,357.50   | 31,026.50   | 28,971.50   | 28,962.00   | 120,317.50  |
| IOWA                 | 10,000.50   | 9,166.00    | 8,964.50    | 8,974.50    | 37,105.50   |
| KANSAS               | 7,259.50    | 6,456.00    | 6,377.50    | 5,876.50    | 25,969.50   |
| KENTUCKY             | 12,770.50   | 12,249.00   | 11,415.00   | 11,351.00   | 47,785.50   |

|                                  |                     |                     |                     |                     |                     |
|----------------------------------|---------------------|---------------------|---------------------|---------------------|---------------------|
| LOUISIANA                        | 13,230.50           | 13,578.50           | 13,103.00           | 13,130.50           | 53,042.50           |
| MAINE                            | 1,035.50            | 1,247.50            | 1,289.00            | 1,124.00            | 4,696.00            |
| MARYLAND                         | 25,335.00           | 26,738.50           | 25,630.50           | 24,938.50           | 102,642.50          |
| MASSACHUSETTS                    | 15,863.00           | 17,030.00           | 16,565.00           | 16,599.50           | 66,057.50           |
| MICHIGAN                         | 18,174.50           | 17,096.00           | 16,328.50           | 15,931.50           | 67,530.50           |
| MINNESOTA                        | 3,962.50            | 3,644.50            | 3,689.00            | 3,654.50            | 14,950.50           |
| MISSISSIPPI                      | 9,878.00            | 8,950.00            | 8,935.00            | 8,223.00            | 35,986.00           |
| MISSOURI                         | 20,928.50           | 21,203.50           | 19,595.00           | 19,523.00           | 81,250.00           |
| MONTANA                          | 1,490.50            | 1,548.00            | 1,524.50            | 1,564.50            | 6,127.50            |
| NEBRASKA                         | 8,846.50            | 9,053.00            | 9,348.00            | 9,807.00            | 37,054.50           |
| NEVADA                           | 9,832.50            | 8,777.00            | 8,058.00            | 8,099.50            | 34,767.00           |
| NEW HAMPSHIRE                    | 5,777.00            | 6,018.00            | 6,388.50            | 6,108.00            | 24,291.50           |
| NEW JERSEY                       | 35,169.50           | 35,073.00           | 32,327.00           | 32,171.50           | 134,741.00          |
| NEW MEXICO                       | 2,798.00            | 2,515.50            | 2,497.50            | 2,393.50            | 10,204.50           |
| NEW YORK                         | 78,445.00           | 79,223.00           | 74,897.00           | 75,045.50           | 307,610.50          |
| NORTH CAROLINA                   | 81,066.50           | 83,766.00           | 81,859.00           | 85,142.00           | 331,833.50          |
| NORTH DAKOTA                     | 1,758.50            | 1,883.00            | 1,822.50            | 1,762.00            | 7,226.00            |
| OHIO                             | 48,657.45           | 47,606.95           | 44,439.83           | 43,022.33           | 183,726.55          |
| OKLAHOMA                         | 19,671.50           | 17,618.00           | 14,891.50           | 10,765.00           | 62,946.00           |
| OREGON                           | 6,727.00            | 6,508.50            | 6,155.00            | 5,404.00            | 24,794.50           |
| PENNSYLVANIA                     | 52,872.50           | 52,792.50           | 49,541.00           | 49,394.50           | 204,600.50          |
| PUERTO RICO                      | 487.00              | 574.50              | 442.00              | 452.50              | 1,956.00            |
| RHODE ISLAND                     | 1,728.00            | 2,163.50            | 1,815.50            | 1,861.50            | 7,568.50            |
| SOUTH CAROLINA                   | 35,684.00           | 36,926.00           | 35,000.50           | 33,620.50           | 141,231.00          |
| SOUTH DAKOTA                     | 4,127.50            | 3,790.50            | 3,472.00            | 3,478.00            | 14,868.00           |
| TENNESSEE                        | 26,459.00           | 27,546.50           | 25,123.50           | 24,341.50           | 103,470.50          |
| TEXAS                            | 81,107.50           | 76,671.45           | 73,511.50           | 70,488.00           | 301,778.45          |
| UTAH                             | 11,069.50           | 10,496.00           | 10,191.50           | 10,471.00           | 42,228.00           |
| VERMONT                          | 916.00              | 967.00              | 1,100.00            | 905.50              | 3,888.50            |
| VIRGIN ISLANDS                   | 0                   | 0                   | 5.00                | 0                   | 5.00                |
| VIRGINIA                         | 33,686.00           | 32,769.00           | 30,043.50           | 29,618.50           | 126,117.00          |
| WASHINGTON                       | 14,427.00           | 14,482.50           | 13,872.00           | 14,127.00           | 56,908.50           |
| WEST VIRGINIA                    | 4,698.00            | 4,419.50            | 3,783.50            | 3,472.50            | 16,373.50           |
| WISCONSIN                        | 11,906.50           | 11,217.00           | 10,775.15           | 10,467.00           | 44,365.65           |
| WYOMING                          | 1,780.50            | 1,510.00            | 1,624.00            | 1,482.00            | 6,396.50            |
| <b>9780 - TAPENTADOL - Total</b> | <b>1,138,504.85</b> | <b>1,125,166.83</b> | <b>1,061,311.43</b> | <b>1,038,321.28</b> | <b>4,363,304.38</b> |

**DRUG: 9801 - FENTANYL BASE**

| STATE   | 1ST QUARTER | 2ND QUARTER | 3RD QUARTER | 4TH QUARTER | TOTAL GRAMS |
|---------|-------------|-------------|-------------|-------------|-------------|
| ALABAMA | 1,298.70    | 1,177.82    | 1,092.40    | 1,004.20    | 4,573.12    |
| ALASKA  | 224.57      | 189.47      | 176.71      | 146.41      | 737.16      |

ARCOS 3 - REPORT 02 by GRAMS  
RETAIL DRUG DISTRIBUTION BY STATE WITHIN DRUG CODE

|                      | 0.01     | 0.05     | 0.26     | 0.05     | 0.37      |
|----------------------|----------|----------|----------|----------|-----------|
| AMERICAN SAMOA       |          |          |          |          |           |
| ARIZONA              | 1,493.82 | 1,284.59 | 1,185.69 | 1,061.51 | 5,025.61  |
| ARKANSAS             | 783.11   | 670.68   | 613.65   | 573.76   | 2,641.19  |
| CALIFORNIA           | 6,095.60 | 5,610.45 | 5,040.20 | 4,819.59 | 21,565.83 |
| COLORADO             | 1,114.87 | 984.90   | 936.41   | 849.80   | 3,885.98  |
| CONNECTICUT          | 868.21   | 709.28   | 691.77   | 660.86   | 2,930.12  |
| DELAWARE             | 314.40   | 260.38   | 230.68   | 202.56   | 1,008.02  |
| DISTRICT OF COLUMBIA | 78.67    | 73.74    | 68.38    | 66.54    | 287.34    |
| FLORIDA              | 5,517.05 | 4,950.45 | 4,146.25 | 3,996.39 | 18,610.14 |
| GEORGIA              | 2,467.35 | 2,239.30 | 2,092.68 | 1,990.60 | 8,789.93  |
| GUAM                 | 8.96     | 7.20     | 9.21     | 7.39     | 32.77     |
| HAWAII               | 169.98   | 159.24   | 147.76   | 143.32   | 620.30    |
| IDAHO                | 560.67   | 496.92   | 475.76   | 449.96   | 1,983.31  |
| ILLINOIS             | 2,751.72 | 2,386.75 | 2,236.62 | 2,140.06 | 9,515.16  |
| INDIANA              | 1,663.14 | 1,478.14 | 1,389.31 | 1,313.43 | 5,844.02  |
| IOWA                 | 795.57   | 736.56   | 711.00   | 680.72   | 2,923.85  |
| KANSAS               | 960.00   | 873.71   | 817.86   | 805.40   | 3,456.97  |
| KENTUCKY             | 1,004.59 | 920.63   | 857.97   | 774.49   | 3,557.68  |
| LOUISIANA            | 1,014.57 | 915.75   | 855.53   | 817.67   | 3,603.52  |
| MAINE                | 303.68   | 273.58   | 266.44   | 258.04   | 1,101.74  |
| MARYLAND             | 1,177.18 | 1,047.83 | 954.78   | 890.95   | 4,070.73  |
| MASSACHUSETTS        | 1,174.34 | 1,103.65 | 1,003.65 | 993.50   | 4,275.14  |
| MICHIGAN             | 2,700.25 | 2,414.26 | 2,224.25 | 2,067.19 | 9,405.95  |
| MINNESOTA            | 922.88   | 788.02   | 783.81   | 728.27   | 3,222.99  |
| MISSISSIPPI          | 1,060.52 | 940.87   | 1,029.70 | 848.63   | 3,879.72  |
| MISSOURI             | 1,909.91 | 1,718.82 | 1,612.29 | 1,534.63 | 6,775.65  |
| MONTANA              | 291.92   | 273.83   | 253.34   | 241.54   | 1,060.63  |
| NEBRASKA             | 480.32   | 452.28   | 421.16   | 414.18   | 1,767.93  |
| NEVADA               | 481.88   | 426.52   | 391.63   | 360.60   | 1,660.62  |
| NEW HAMPSHIRE        | 306.85   | 292.11   | 262.01   | 242.68   | 1,103.65  |
| NEW JERSEY           | 2,333.70 | 1,782.18 | 1,657.43 | 1,627.45 | 7,400.76  |
| NEW MEXICO           | 396.02   | 333.23   | 316.18   | 304.93   | 1,350.36  |
| NEW YORK             | 3,767.36 | 3,452.98 | 3,131.91 | 3,050.47 | 13,402.72 |
| NORTH CAROLINA       | 2,441.52 | 2,187.04 | 2,074.21 | 1,999.21 | 8,701.98  |
| NORTH DAKOTA         | 200.92   | 193.22   | 180.11   | 165.49   | 739.73    |
| OHIO                 | 2,070.84 | 1,893.13 | 1,654.43 | 1,564.55 | 7,182.96  |
| OKLAHOMA             | 1,422.86 | 1,224.66 | 1,092.96 | 908.41   | 4,648.89  |
| OREGON               | 808.80   | 756.41   | 689.02   | 647.95   | 2,902.19  |
| PENNSYLVANIA         | 4,314.42 | 3,882.29 | 3,696.00 | 3,363.39 | 15,256.11 |
| PUERTO RICO          | 77.83    | 81.40    | 161.63   | 167.96   | 488.81    |



|                                     |                  |                  |                  |                  |                   |
|-------------------------------------|------------------|------------------|------------------|------------------|-------------------|
| RHODE ISLAND                        | 162.75           | 139.36           | 139.79           | 133.06           | 574.96            |
| SOUTH CAROLINA                      | 1,171.83         | 1,005.39         | 978.22           | 920.89           | 4,076.33          |
| SOUTH DAKOTA                        | 258.33           | 233.37           | 216.15           | 200.14           | 907.99            |
| TENNESSEE                           | 1,767.99         | 1,509.25         | 1,471.14         | 1,227.94         | 5,976.32          |
| TEXAS                               | 5,136.47         | 4,661.60         | 4,231.75         | 3,958.35         | 17,988.16         |
| UTAH                                | 754.91           | 675.62           | 638.57           | 619.90           | 2,688.99          |
| VERMONT                             | 167.38           | 155.09           | 139.68           | 135.42           | 597.57            |
| VIRGIN ISLANDS                      | 3.93             | 4.58             | 5.41             | 4.01             | 17.93             |
| VIRGINIA                            | 1,492.39         | 1,359.62         | 1,256.52         | 1,200.31         | 5,308.84          |
| WASHINGTON                          | 1,326.71         | 1,262.09         | 1,168.78         | 1,101.16         | 4,858.73          |
| WEST VIRGINIA                       | 480.43           | 443.49           | 394.99           | 391.76           | 1,710.68          |
| WISCONSIN                           | 1,315.89         | 1,168.39         | 1,076.41         | 997.05           | 4,557.74          |
| WYOMING                             | 141.06           | 120.91           | 117.74           | 111.00           | 490.71            |
| <b>9801 - FENTANYL BASE - Total</b> | <b>72,009.63</b> | <b>64,383.09</b> | <b>59,468.16</b> | <b>55,885.75</b> | <b>251,746.63</b> |

Apr 22, 2020

12:03:09 PM

**DRUG: 1100 - AMPHETAMINE**

| STATE NAME           | Q1 CALC GRAMS | Q2 CALC GRAMS | Q3 CALC GRAMS | Q4 CALC GRAMS | TOTAL GRAMS |
|----------------------|---------------|---------------|---------------|---------------|-------------|
| ALABAMA              | 2,834.39      | 2,814.79      | 2,873.27      | 2,871.54      | 11,394.00   |
| ALASKA               | 1,154.59      | 1,198.68      | 1,199.41      | 1,220.51      | 4,773.19    |
| AMERICAN SAMOA       | 0.00          | 3.81          | 0.00          | 0.00          | 3.81        |
| ARIZONA              | 1,368.71      | 1,476.31      | 1,596.44      | 1,446.75      | 5,888.21    |
| ARKANSAS             | 1,794.45      | 1,765.50      | 1,815.14      | 1,801.82      | 7,176.90    |
| CALIFORNIA           | 805.84        | 830.32        | 819.28        | 841.39        | 3,296.84    |
| COLORADO             | 1,655.30      | 1,687.23      | 1,740.02      | 1,776.42      | 6,858.98    |
| CONNECTICUT          | 1,556.45      | 1,564.47      | 1,606.58      | 1,629.83      | 6,357.34    |
| DELAWARE             | 2,348.17      | 2,367.82      | 2,358.63      | 2,399.04      | 9,473.66    |
| DISTRICT OF COLUMBIA | 2,009.37      | 2,067.67      | 2,071.63      | 2,082.47      | 8,231.14    |
| FLORIDA              | 1,696.79      | 1,719.66      | 1,705.36      | 1,722.93      | 6,844.75    |
| GEORGIA              | 2,027.42      | 1,984.42      | 2,046.98      | 2,055.44      | 8,114.25    |
| GUAM                 | 208.23        | 265.68        | 273.50        | 238.62        | 986.03      |
| HAWAII               | 743.89        | 758.55        | 784.88        | 743.88        | 3,031.19    |
| IDAHO                | 1,738.42      | 1,783.58      | 1,799.44      | 1,875.66      | 7,197.10    |
| ILLINOIS             | 1,533.93      | 1,538.06      | 1,566.89      | 1,597.18      | 6,236.06    |
| INDIANA              | 2,080.66      | 2,076.97      | 2,113.84      | 2,130.65      | 8,402.12    |
| IOWA                 | 1,692.64      | 1,705.04      | 1,745.05      | 1,777.12      | 6,919.85    |
| KANSAS               | 2,193.72      | 2,215.54      | 2,247.20      | 2,265.39      | 8,921.86    |
| KENTUCKY             | 1,663.76      | 1,624.88      | 1,647.47      | 1,666.42      | 6,602.53    |
| LOUISIANA            | 3,576.00      | 3,566.67      | 3,723.52      | 3,735.87      | 14,602.07   |
| MAINE                | 1,768.50      | 1,771.34      | 1,873.13      | 1,844.64      | 7,257.61    |
| MARYLAND             | 1,638.17      | 1,680.11      | 1,660.40      | 1,698.18      | 6,676.86    |
| MASSACHUSETTS        | 2,761.04      | 2,767.08      | 2,803.26      | 2,850.18      | 11,181.56   |
| MICHIGAN             | 2,477.40      | 2,465.59      | 2,461.81      | 2,498.70      | 9,903.51    |
| MINNESOTA            | 2,077.89      | 2,089.56      | 2,082.99      | 2,172.11      | 8,422.56    |
| MISSISSIPPI          | 2,088.06      | 2,047.29      | 2,120.53      | 2,079.89      | 8,335.78    |
| MISSOURI             | 2,283.11      | 2,290.57      | 2,363.62      | 2,584.47      | 9,521.79    |
| MONTANA              | 1,447.16      | 1,487.29      | 1,502.31      | 1,535.24      | 5,972.00    |
| NEBRASKA             | 1,465.23      | 1,491.54      | 1,512.42      | 1,554.78      | 6,023.97    |
| NEVADA               | 979.29        | 989.69        | 1,015.71      | 1,016.49      | 4,001.18    |
| NEW HAMPSHIRE        | 2,985.45      | 3,056.39      | 3,137.95      | 3,084.37      | 12,264.15   |
| NEW JERSEY           | 1,207.74      | 1,243.36      | 1,251.66      | 1,281.83      | 4,984.58    |
| NEW MEXICO           | 726.86        | 738.32        | 750.95        | 755.77        | 2,971.90    |
| NEW YORK             | 1,253.89      | 1,292.93      | 1,285.75      | 1,323.49      | 5,156.06    |
| NORTH CAROLINA       | 2,226.31      | 2,187.08      | 2,231.66      | 2,314.24      | 8,959.28    |
| NORTH DAKOTA         | 1,367.78      | 1,365.38      | 1,410.47      | 1,432.87      | 5,576.50    |
| OHIO                 | 1,853.25      | 1,814.94      | 1,742.66      | 1,798.44      | 7,209.29    |
| OKLAHOMA             | 1,459.82      | 1,444.74      | 1,466.02      | 1,469.46      | 5,840.04    |
| OREGON               | 1,581.28      | 1,648.82      | 1,623.11      | 1,670.33      | 6,523.53    |
| PENNSYLVANIA         | 1,680.00      | 1,697.65      | 1,686.89      | 1,696.12      | 6,760.67    |

|                                   |                 |                 |                 |                 |                 |
|-----------------------------------|-----------------|-----------------|-----------------|-----------------|-----------------|
| PUERTO RICO                       | 256.86          | 247.04          | 249.40          | 262.74          | 1,016.04        |
| RHODE ISLAND                      | 3,619.01        | 3,647.07        | 3,741.30        | 3,672.53        | 14,679.91       |
| SOUTH CAROLINA                    | 3,011.43        | 2,933.72        | 3,061.57        | 3,051.95        | 12,058.67       |
| SOUTH DAKOTA                      | 1,940.37        | 1,822.88        | 1,867.31        | 1,882.71        | 7,513.27        |
| TENNESSEE                         | 2,106.71        | 2,100.55        | 2,160.55        | 2,139.90        | 8,507.71        |
| TEXAS                             | 1,718.54        | 1,735.60        | 1,803.78        | 1,825.59        | 7,083.51        |
| UTAH                              | 3,146.94        | 3,178.36        | 3,257.84        | 3,394.57        | 12,977.71       |
| VERMONT                           | 1,610.25        | 1,602.93        | 1,623.47        | 1,641.71        | 6,478.35        |
| VIRGIN ISLANDS                    | 280.79          | 303.22          | 316.91          | 305.64          | 1,206.55        |
| VIRGINIA                          | 2,278.57        | 2,271.86        | 2,315.36        | 2,306.79        | 9,172.59        |
| WASHINGTON                        | 1,675.84        | 1,732.31        | 1,701.89        | 1,768.41        | 6,878.45        |
| WEST VIRGINIA                     | 1,269.48        | 1,273.81        | 1,273.26        | 1,279.45        | 5,096.00        |
| WISCONSIN                         | 2,223.78        | 2,204.52        | 2,213.55        | 2,231.86        | 8,873.71        |
| WYOMING                           | 1,218.98        | 1,202.35        | 1,229.71        | 1,249.86        | 4,900.89        |
| <b>1100 - AMPHETAMINE - Total</b> | <b>1,724.45</b> | <b>1,734.11</b> | <b>1,756.46</b> | <b>1,781.99</b> | <b>6,997.01</b> |

**DRUG: 1105 - METHAMPHETAMINE**

| STATE NAME           | Q1 CALC GRAMS | Q2 CALC GRAMS | Q3 CALC GRAMS | Q4 CALC GRAMS | TOTAL GRAMS |
|----------------------|---------------|---------------|---------------|---------------|-------------|
| ALABAMA              | 0.63          | 0.70          | 0.72          | 0.79          | 2.84        |
| ALASKA               | 0.28          | 0.28          | 0.51          | 0.00          | 1.07        |
| ARIZONA              | 0.58          | 0.63          | 1.00          | 0.61          | 2.82        |
| ARKANSAS             | 0.30          | 0.25          | 0.08          | 0.33          | 0.96        |
| CALIFORNIA           | 0.73          | 0.74          | 0.73          | 0.70          | 2.90        |
| COLORADO             | 1.13          | 1.17          | 1.26          | 1.12          | 4.68        |
| CONNECTICUT          | 0.69          | 0.70          | 0.57          | 0.73          | 2.69        |
| DELAWARE             | 0.36          | 0.63          | 0.49          | 0.49          | 1.97        |
| DISTRICT OF COLUMBIA | 0.87          | 1.94          | 1.20          | 0.93          | 4.94        |
| FLORIDA              | 0.27          | 0.25          | 0.28          | 0.25          | 1.05        |
| GEORGIA              | 0.25          | 0.17          | 0.23          | 0.26          | 0.92        |
| HAWAII               | 0.38          | 0.35          | 0.35          | 0.53          | 1.62        |
| IDAHO                | 1.00          | 0.77          | 0.90          | 0.87          | 3.54        |
| ILLINOIS             | 0.43          | 0.40          | 0.40          | 0.38          | 1.62        |
| INDIANA              | 0.40          | 0.43          | 0.38          | 0.38          | 1.58        |
| IOWA                 | 0.57          | 0.58          | 0.70          | 0.47          | 2.32        |
| KANSAS               | 0.51          | 0.55          | 0.55          | 0.55          | 2.15        |
| KENTUCKY             | 0.25          | 0.27          | 0.32          | 0.24          | 1.08        |
| LOUISIANA            | 0.35          | 0.34          | 0.35          | 0.30          | 1.33        |
| MAINE                | 0.79          | 0.79          | 1.51          | 0.91          | 3.99        |
| MARYLAND             | 0.64          | 0.58          | 0.67          | 0.79          | 2.67        |
| MASSACHUSETTS        | 0.66          | 0.58          | 0.48          | 0.41          | 2.13        |
| MICHIGAN             | 0.31          | 0.26          | 0.25          | 0.21          | 1.02        |

|                                 |             |             |             |             |             |
|---------------------------------|-------------|-------------|-------------|-------------|-------------|
| MINNESOTA                       | 1.45        | 1.34        | 1.39        | 1.48        | 5.67        |
| MISSISSIPPI                     | 0.22        | 0.20        | 0.28        | 0.34        | 1.04        |
| MISSOURI                        | 0.46        | 0.74        | 0.70        | 0.97        | 2.88        |
| MONTANA                         | 0.00        | 0.04        | 0.00        | 0.00        | 0.04        |
| NEBRASKA                        | 0.29        | 0.33        | 0.42        | 0.07        | 1.10        |
| NEVADA                          | 0.71        | 0.95        | 0.85        | 0.52        | 3.04        |
| NEW HAMPSHIRE                   | 0.43        | 0.40        | 0.37        | 0.31        | 1.50        |
| NEW JERSEY                      | 0.49        | 0.37        | 0.38        | 0.34        | 1.59        |
| NEW MEXICO                      | 0.23        | 0.16        | 0.29        | 0.43        | 1.11        |
| NEW YORK                        | 0.50        | 0.47        | 0.46        | 0.45        | 1.89        |
| NORTH CAROLINA                  | 0.53        | 0.54        | 0.53        | 0.41        | 2.01        |
| NORTH DAKOTA                    | 0.54        | 1.08        | 0.60        | 0.66        | 2.87        |
| OHIO                            | 0.17        | 0.62        | 0.29        | 0.28        | 1.37        |
| OKLAHOMA                        | 0.43        | 0.33        | 0.41        | 0.29        | 1.46        |
| OREGON                          | 1.04        | 0.71        | 0.91        | 1.05        | 3.71        |
| PENNSYLVANIA                    | 0.96        | 0.98        | 0.85        | 1.00        | 3.79        |
| RHODE ISLAND                    | 0.34        | 0.42        | 0.19        | 0.46        | 1.41        |
| SOUTH CAROLINA                  | 0.35        | 0.42        | 0.30        | 0.50        | 1.57        |
| SOUTH DAKOTA                    | 1.33        | 0.84        | 0.69        | 0.99        | 3.85        |
| TENNESSEE                       | 0.23        | 0.21        | 0.28        | 0.21        | 0.93        |
| TEXAS                           | 0.43        | 0.43        | 0.41        | 0.42        | 1.69        |
| UTAH                            | 1.05        | 0.86        | 0.78        | 0.73        | 3.42        |
| VERMONT                         | 0.32        | 0.19        | 0.45        | 0.39        | 1.35        |
| VIRGINIA                        | 0.44        | 0.36        | 0.41        | 0.37        | 1.58        |
| WASHINGTON                      | 1.37        | 1.39        | 1.34        | 1.16        | 5.26        |
| WEST VIRGINIA                   | 0.26        | 0.20        | 0.17        | 0.37        | 1.00        |
| WISCONSIN                       | 0.57        | 0.63        | 0.62        | 0.61        | 2.43        |
| WYOMING                         | 0.86        | 0.64        | 0.93        | 0.86        | 3.28        |
| <b>1105 - METHAMPHETAMINE -</b> | <b>0.54</b> | <b>0.55</b> | <b>0.54</b> | <b>0.52</b> | <b>2.15</b> |

**DRUG: 1205 - LISDEXAMFETAMINE**

| STATE NAME           | Q1 CALC GRAMS | Q2 CALC GRAMS | Q3 CALC GRAMS | Q4 CALC GRAMS | TOTAL GRAMS |
|----------------------|---------------|---------------|---------------|---------------|-------------|
| ALABAMA              | 1,508.95      | 1,446.07      | 1,465.58      | 1,518.01      | 5,938.60    |
| ALASKA               | 360.83        | 370.35        | 385.82        | 379.47        | 1,496.47    |
| ARIZONA              | 600.75        | 650.82        | 759.69        | 633.07        | 2,644.34    |
| ARKANSAS             | 1,051.34      | 990.77        | 984.20        | 1,018.83      | 4,045.14    |
| CALIFORNIA           | 301.55        | 301.94        | 297.46        | 313.03        | 1,213.98    |
| COLORADO             | 575.68        | 566.78        | 571.46        | 602.64        | 2,316.55    |
| CONNECTICUT          | 1,011.99      | 1,012.67      | 986.92        | 1,039.89      | 4,051.46    |
| DELAWARE             | 1,598.84      | 1,537.49      | 1,475.94      | 1,596.39      | 6,208.66    |
| DISTRICT OF COLUMBIA | 919.43        | 953.15        | 923.08        | 961.61        | 3,757.27    |

ARCOS 3 - REPORT 03 by GRAMS  
QUARTERLY DRUG DISTRIBUTION BY STATE PER 100K POPULATION

|                |          |          |          |          |          |
|----------------|----------|----------|----------|----------|----------|
| FLORIDA        | 738.08   | 710.26   | 684.65   | 745.00   | 2,877.99 |
| GEORGIA        | 1,038.32 | 986.73   | 998.63   | 1,021.93 | 4,045.62 |
| GUAM           | 5.18     | 10.37    | 4.86     | 4.21     | 24.62    |
| HAWAII         | 106.75   | 116.32   | 115.64   | 110.83   | 449.54   |
| IDAHO          | 615.72   | 612.15   | 595.14   | 638.70   | 2,461.71 |
| ILLINOIS       | 556.82   | 560.05   | 554.22   | 581.86   | 2,252.95 |
| INDIANA        | 1,323.92 | 1,263.75 | 1,257.00 | 1,306.06 | 5,150.73 |
| IOWA           | 1,137.01 | 1,123.16 | 1,085.32 | 1,146.63 | 4,492.13 |
| KANSAS         | 1,110.46 | 1,116.80 | 1,092.37 | 1,161.52 | 4,481.15 |
| KENTUCKY       | 970.34   | 930.96   | 927.11   | 946.37   | 3,774.78 |
| LOUISIANA      | 2,006.82 | 1,928.75 | 1,928.26 | 1,994.43 | 7,858.25 |
| MAINE          | 1,272.91 | 1,268.12 | 1,237.49 | 1,264.38 | 5,042.90 |
| MARYLAND       | 978.53   | 992.58   | 937.74   | 1,013.09 | 3,921.93 |
| MASSACHUSETTS  | 562.58   | 576.81   | 552.95   | 605.52   | 2,297.86 |
| MICHIGAN       | 624.71   | 612.71   | 591.98   | 647.45   | 2,476.86 |
| MINNESOTA      | 581.73   | 582.01   | 569.05   | 610.03   | 2,342.82 |
| MISSISSIPPI    | 1,328.13 | 1,216.46 | 1,240.07 | 1,257.76 | 5,042.43 |
| MISSOURI       | 1,098.78 | 1,056.44 | 1,049.24 | 1,275.19 | 4,479.66 |
| MONTANA        | 622.32   | 601.64   | 616.13   | 650.19   | 2,490.28 |
| NEBRASKA       | 948.30   | 916.37   | 934.32   | 1,003.72 | 3,802.72 |
| NEVADA         | 296.08   | 291.63   | 286.00   | 292.03   | 1,165.74 |
| NEW HAMPSHIRE  | 1,051.41 | 1,091.89 | 1,045.17 | 1,106.21 | 4,294.68 |
| NEW JERSEY     | 551.42   | 561.17   | 534.15   | 568.67   | 2,215.41 |
| NEW MEXICO     | 201.32   | 179.23   | 187.68   | 193.18   | 761.40   |
| NEW YORK       | 446.53   | 453.58   | 430.90   | 467.62   | 1,798.63 |
| NORTH CAROLINA | 1,124.65 | 1,100.30 | 1,047.48 | 1,164.47 | 4,436.90 |
| NORTH DAKOTA   | 897.85   | 839.92   | 851.26   | 908.25   | 3,497.27 |
| OHIO           | 947.20   | 870.72   | 801.24   | 850.44   | 3,469.60 |
| OKLAHOMA       | 1,014.93 | 970.26   | 962.88   | 1,014.88 | 3,962.94 |
| OREGON         | 404.83   | 414.25   | 402.34   | 416.21   | 1,637.62 |
| PENNSYLVANIA   | 700.14   | 701.35   | 677.22   | 721.34   | 2,800.04 |
| PUERTO RICO    | 60.93    | 54.82    | 53.48    | 58.31    | 227.54   |
| RHODE ISLAND   | 702.57   | 703.34   | 680.93   | 711.86   | 2,798.70 |
| SOUTH CAROLINA | 1,336.86 | 1,304.93 | 1,259.12 | 1,359.05 | 5,259.96 |
| SOUTH DAKOTA   | 1,299.37 | 1,251.52 | 1,200.04 | 1,282.76 | 5,033.68 |
| TENNESSEE      | 1,086.50 | 1,045.39 | 1,038.82 | 1,076.48 | 4,247.19 |
| TEXAS          | 1,081.74 | 1,043.56 | 1,025.67 | 1,084.16 | 4,235.13 |
| UTAH           | 816.91   | 799.22   | 792.32   | 857.86   | 3,266.31 |
| VERMONT        | 1,155.66 | 1,135.80 | 1,117.97 | 1,177.56 | 4,586.99 |
| VIRGIN ISLANDS | 64.22    | 53.69    | 73.17    | 61.59    | 252.66   |

|                                  |               |               |               |               |                 |
|----------------------------------|---------------|---------------|---------------|---------------|-----------------|
| VIRGINIA                         | 848.14        | 830.42        | 810.83        | 863.21        | 3,352.60        |
| WASHINGTON                       | 521.03        | 531.41        | 515.15        | 552.99        | 2,120.58        |
| WEST VIRGINIA                    | 1,031.82      | 1,017.18      | 968.17        | 1,038.49      | 4,055.67        |
| WISCONSIN                        | 1,271.08      | 1,270.59      | 1,251.04      | 1,336.72      | 5,129.43        |
| WYOMING                          | 488.02        | 469.76        | 441.15        | 467.30        | 1,866.23        |
| <b>1205 - LISDEXAMFETAMINE -</b> | <b>785.04</b> | <b>767.80</b> | <b>752.91</b> | <b>797.89</b> | <b>3,103.65</b> |

**DRUG: 1724 - METHYLPHENIDATE (DL;D;L;ISOMERS)**

| STATE NAME           | Q1 CALC GRAMS | Q2 CALC GRAMS | Q3 CALC GRAMS | Q4 CALC GRAMS | TOTAL GRAMS |
|----------------------|---------------|---------------|---------------|---------------|-------------|
| ALABAMA              | 1,547.25      | 1,414.93      | 1,416.78      | 1,502.23      | 5,881.18    |
| ALASKA               | 1,159.72      | 1,128.03      | 1,050.29      | 1,166.72      | 4,504.75    |
| AMERICAN SAMOA       | 19.76         | 11.86         | 10.54         | 25.03         | 67.20       |
| ARIZONA              | 1,209.39      | 1,286.23      | 1,481.83      | 1,201.18      | 5,178.64    |
| ARKANSAS             | 1,364.42      | 1,282.05      | 1,265.95      | 1,307.92      | 5,220.34    |
| CALIFORNIA           | 721.86        | 706.16        | 660.13        | 709.66        | 2,797.81    |
| COLORADO             | 1,251.25      | 1,203.93      | 1,169.61      | 1,247.25      | 4,872.04    |
| CONNECTICUT          | 1,630.12      | 1,538.67      | 1,409.57      | 1,524.44      | 6,102.80    |
| DELAWARE             | 2,066.20      | 1,945.23      | 1,855.55      | 1,984.21      | 7,851.18    |
| DISTRICT OF COLUMBIA | 1,411.09      | 1,290.14      | 1,219.94      | 1,337.28      | 5,258.45    |
| FLORIDA              | 1,112.98      | 1,053.02      | 981.99        | 1,026.63      | 4,174.61    |
| GEORGIA              | 1,732.26      | 1,557.98      | 1,576.62      | 1,644.91      | 6,511.77    |
| GUAM                 | 226.43        | 267.37        | 378.62        | 239.92        | 1,112.34    |
| HAWAII               | 825.35        | 795.67        | 809.69        | 785.40        | 3,216.11    |
| IDAHO                | 1,830.29      | 1,785.35      | 1,676.99      | 1,754.39      | 7,047.02    |
| ILLINOIS             | 1,350.90      | 1,280.66      | 1,224.28      | 1,312.10      | 5,167.94    |
| INDIANA              | 1,859.87      | 1,755.48      | 1,684.49      | 1,762.34      | 7,062.18    |
| IOWA                 | 2,682.68      | 2,629.22      | 2,471.70      | 2,621.40      | 10,405.01   |
| KANSAS               | 1,722.87      | 1,693.33      | 1,613.58      | 1,743.81      | 6,773.59    |
| KENTUCKY             | 1,769.14      | 1,628.40      | 1,626.57      | 1,679.50      | 6,703.61    |
| LOUISIANA            | 1,898.20      | 1,712.87      | 1,700.90      | 1,875.59      | 7,187.57    |
| MAINE                | 2,711.51      | 2,676.16      | 2,522.74      | 2,516.40      | 10,426.81   |
| MARYLAND             | 1,759.35      | 1,730.86      | 1,553.96      | 1,686.25      | 6,730.42    |
| MASSACHUSETTS        | 2,236.33      | 2,194.12      | 1,976.67      | 2,170.50      | 8,577.62    |
| MICHIGAN             | 1,906.85      | 1,813.21      | 1,681.80      | 1,802.47      | 7,204.33    |
| MINNESOTA            | 1,954.40      | 1,864.35      | 1,773.65      | 1,924.74      | 7,517.14    |
| MISSISSIPPI          | 1,432.45      | 1,337.38      | 1,351.10      | 1,437.09      | 5,558.03    |
| MISSOURI             | 2,062.80      | 2,023.79      | 2,031.41      | 2,486.97      | 8,604.97    |
| MONTANA              | 1,810.46      | 1,712.66      | 1,602.25      | 1,715.44      | 6,840.80    |
| NEBRASKA             | 1,707.16      | 1,635.84      | 1,613.34      | 1,703.37      | 6,659.71    |
| NEVADA               | 554.34        | 528.76        | 533.56        | 539.05        | 2,155.71    |
| NEW HAMPSHIRE        | 2,576.04      | 2,588.56      | 2,419.33      | 2,516.10      | 10,100.03   |

|                                  |                 |                 |                 |                 |                 |
|----------------------------------|-----------------|-----------------|-----------------|-----------------|-----------------|
| NEW JERSEY                       | 1,050.96        | 1,035.90        | 928.01          | 1,028.67        | 4,043.54        |
| NEW MEXICO                       | 939.50          | 862.55          | 838.18          | 877.77          | 3,517.99        |
| NEW YORK                         | 1,196.05        | 1,194.26        | 1,071.43        | 1,170.66        | 4,632.38        |
| NORTH CAROLINA                   | 2,027.47        | 1,904.70        | 1,718.17        | 1,911.09        | 7,561.43        |
| NORTH DAKOTA                     | 2,328.58        | 2,202.97        | 2,125.76        | 2,302.01        | 8,959.32        |
| OHIO                             | 1,935.48        | 1,790.94        | 1,587.69        | 1,727.70        | 7,041.82        |
| OKLAHOMA                         | 1,336.41        | 1,208.20        | 1,182.73        | 1,245.23        | 4,972.58        |
| OREGON                           | 1,616.79        | 1,641.82        | 1,537.21        | 1,620.17        | 6,416.00        |
| PENNSYLVANIA                     | 1,778.10        | 1,730.98        | 1,617.63        | 1,730.97        | 6,857.68        |
| PUERTO RICO                      | 408.02          | 392.40          | 358.94          | 380.99          | 1,540.34        |
| RHODE ISLAND                     | 1,829.77        | 1,776.14        | 1,590.02        | 1,695.57        | 6,891.50        |
| SOUTH CAROLINA                   | 1,937.49        | 1,824.60        | 1,723.57        | 1,866.10        | 7,351.77        |
| SOUTH DAKOTA                     | 2,707.40        | 2,367.69        | 2,453.67        | 2,505.61        | 10,034.37       |
| TENNESSEE                        | 1,319.06        | 1,239.50        | 1,224.49        | 1,277.77        | 5,060.81        |
| TEXAS                            | 1,334.57        | 1,278.56        | 1,174.56        | 1,317.12        | 5,104.80        |
| UTAH                             | 1,706.79        | 1,632.52        | 1,588.56        | 1,718.71        | 6,646.58        |
| VERMONT                          | 3,054.53        | 3,018.74        | 2,870.95        | 3,029.64        | 11,973.87       |
| VIRGIN ISLANDS                   | 122.95          | 145.53          | 120.81          | 144.43          | 533.72          |
| VIRGINIA                         | 1,699.16        | 1,638.35        | 1,547.11        | 1,621.50        | 6,506.11        |
| WASHINGTON                       | 1,704.42        | 1,699.71        | 1,565.95        | 1,686.54        | 6,656.63        |
| WEST VIRGINIA                    | 1,745.13        | 1,648.14        | 1,536.58        | 1,586.24        | 6,516.09        |
| WISCONSIN                        | 1,917.70        | 1,766.77        | 1,694.50        | 1,813.06        | 7,192.03        |
| WYOMING                          | 1,386.97        | 1,338.89        | 1,246.96        | 1,400.90        | 5,373.72        |
| <b>1724 - METHYLPHENIDATE (D</b> | <b>1,472.70</b> | <b>1,410.41</b> | <b>1,331.49</b> | <b>1,427.74</b> | <b>5,642.34</b> |

**DRUG: 9050 - CODEINE**

| STATE NAME           | Q1 CALC GRAMS | Q2 CALC GRAMS | Q3 CALC GRAMS | Q4 CALC GRAMS | TOTAL GRAMS |
|----------------------|---------------|---------------|---------------|---------------|-------------|
| ALABAMA              | 1,144.99      | 1,022.24      | 1,028.30      | 1,022.38      | 4,217.91    |
| ALASKA               | 879.47        | 857.83        | 858.18        | 723.12        | 3,318.60    |
| AMERICAN SAMOA       | 289.62        | 538.82        | 276.14        | 511.88        | 1,616.46    |
| ARIZONA              | 1,052.10      | 897.77        | 902.17        | 860.12        | 3,712.17    |
| ARKANSAS             | 2,328.16      | 2,084.59      | 2,022.79      | 1,855.08      | 8,290.62    |
| CALIFORNIA           | 1,156.61      | 1,083.71      | 1,072.61      | 995.76        | 4,308.69    |
| COLORADO             | 489.22        | 425.93        | 412.88        | 356.79        | 1,684.80    |
| CONNECTICUT          | 569.46        | 570.32        | 532.25        | 523.78        | 2,195.81    |
| DELAWARE             | 937.38        | 909.97        | 850.71        | 860.01        | 3,558.07    |
| DISTRICT OF COLUMBIA | 1,837.33      | 1,754.57      | 1,801.08      | 1,497.56      | 6,890.53    |
| FLORIDA              | 908.70        | 810.11        | 748.10        | 727.00        | 3,193.91    |
| GEORGIA              | 1,061.99      | 949.76        | 912.35        | 853.17        | 3,777.27    |
| GUAM                 | 521.72        | 573.07        | 538.63        | 383.56        | 2,016.98    |
| HAWAII               | 905.83        | 882.68        | 845.77        | 778.57        | 3,412.85    |

ARCOS 3 - REPORT 03 by GRAMS  
 QUARTERLY DRUG DISTRIBUTION BY STATE PER 100K POPULATION

|                |          |          |          |          |           |
|----------------|----------|----------|----------|----------|-----------|
| IDAHO          | 835.90   | 700.96   | 791.43   | 778.01   | 3,106.30  |
| ILLINOIS       | 1,148.77 | 1,101.98 | 1,116.42 | 1,070.30 | 4,437.47  |
| INDIANA        | 745.71   | 681.23   | 637.63   | 629.91   | 2,694.48  |
| IOWA           | 616.44   | 545.73   | 635.91   | 527.37   | 2,325.45  |
| KANSAS         | 927.99   | 812.18   | 867.87   | 746.54   | 3,354.58  |
| KENTUCKY       | 1,071.93 | 975.93   | 945.60   | 882.23   | 3,875.68  |
| LOUISIANA      | 895.10   | 838.48   | 832.50   | 806.01   | 3,372.08  |
| MAINE          | 729.12   | 641.54   | 677.04   | 619.66   | 2,667.37  |
| MARYLAND       | 891.50   | 895.97   | 801.07   | 807.93   | 3,396.47  |
| MASSACHUSETTS  | 628.93   | 643.79   | 577.36   | 608.33   | 2,458.42  |
| MICHIGAN       | 2,318.12 | 2,115.88 | 1,928.05 | 1,833.26 | 8,195.31  |
| MINNESOTA      | 650.03   | 590.55   | 608.26   | 587.46   | 2,436.30  |
| MISSISSIPPI    | 892.17   | 765.26   | 757.03   | 707.81   | 3,122.28  |
| MISSOURI       | 1,044.67 | 979.07   | 1,062.75 | 972.34   | 4,058.83  |
| MONTANA        | 940.67   | 872.31   | 949.99   | 828.74   | 3,591.71  |
| NEBRASKA       | 614.39   | 542.52   | 571.45   | 527.56   | 2,255.92  |
| NEVADA         | 794.53   | 747.35   | 721.21   | 654.65   | 2,917.74  |
| NEW HAMPSHIRE  | 528.66   | 504.58   | 496.53   | 473.85   | 2,003.62  |
| NEW JERSEY     | 791.08   | 797.37   | 737.51   | 746.50   | 3,072.45  |
| NEW MEXICO     | 908.86   | 728.53   | 814.57   | 753.53   | 3,205.50  |
| NEW YORK       | 665.52   | 666.69   | 625.64   | 609.97   | 2,567.83  |
| NORTH CAROLINA | 480.49   | 422.67   | 387.81   | 421.17   | 1,712.14  |
| NORTH DAKOTA   | 754.56   | 716.52   | 648.43   | 672.00   | 2,791.51  |
| OHIO           | 762.12   | 692.58   | 645.49   | 565.75   | 2,665.94  |
| OKLAHOMA       | 2,437.61 | 2,334.78 | 2,331.36 | 2,175.46 | 9,279.21  |
| OREGON         | 869.11   | 788.77   | 792.39   | 728.62   | 3,178.90  |
| PENNSYLVANIA   | 920.46   | 901.61   | 848.00   | 830.61   | 3,500.68  |
| PUERTO RICO    | 308.34   | 332.99   | 331.06   | 286.39   | 1,258.78  |
| RHODE ISLAND   | 587.83   | 585.48   | 496.76   | 516.32   | 2,186.39  |
| SOUTH CAROLINA | 1,584.81 | 1,555.80 | 1,575.65 | 1,358.39 | 6,074.65  |
| SOUTH DAKOTA   | 731.48   | 676.74   | 733.25   | 665.02   | 2,806.48  |
| TENNESSEE      | 1,172.93 | 1,045.39 | 1,110.07 | 909.80   | 4,238.19  |
| TEXAS          | 3,694.73 | 3,780.70 | 3,592.80 | 3,491.48 | 14,559.71 |
| UTAH           | 610.72   | 504.30   | 510.96   | 502.83   | 2,128.81  |
| VERMONT        | 432.05   | 454.95   | 430.09   | 422.76   | 1,739.85  |
| VIRGIN ISLANDS | 577.55   | 759.74   | 416.70   | 775.84   | 2,529.83  |
| VIRGINIA       | 629.32   | 573.87   | 564.09   | 539.45   | 2,306.73  |
| WASHINGTON     | 850.52   | 801.80   | 800.09   | 742.24   | 3,194.64  |
| WEST VIRGINIA  | 1,878.68 | 1,932.54 | 1,953.61 | 1,968.88 | 7,733.71  |
| WISCONSIN      | 778.78   | 734.11   | 734.97   | 709.09   | 2,956.96  |



|                               |                 |                 |                 |                 |                 |
|-------------------------------|-----------------|-----------------|-----------------|-----------------|-----------------|
| WYOMING                       | 718.94          | 598.06          | 655.19          | 570.33          | 2,542.51        |
| <b>9050 - CODEINE - Total</b> | <b>1,193.24</b> | <b>1,139.44</b> | <b>1,103.35</b> | <b>1,049.74</b> | <b>4,485.76</b> |

**DRUG: 9064 - BUPRENORPHINE**

| STATE NAME           | Q1 CALC GRAMS | Q2 CALC GRAMS | Q3 CALC GRAMS | Q4 CALC GRAMS | TOTAL GRAMS |
|----------------------|---------------|---------------|---------------|---------------|-------------|
| ALABAMA              | 563.17        | 599.62        | 616.19        | 640.56        | 2,419.55    |
| ALASKA               | 363.80        | 375.97        | 372.23        | 375.45        | 1,487.46    |
| AMERICAN SAMOA       | 0.03          | 0.00          | 0.03          | 0.00          | 0.06        |
| ARIZONA              | 156.56        | 170.21        | 181.88        | 196.08        | 704.73      |
| ARKANSAS             | 225.16        | 248.60        | 256.74        | 266.58        | 997.09      |
| CALIFORNIA           | 107.73        | 112.32        | 118.02        | 123.63        | 461.70      |
| COLORADO             | 159.77        | 169.33        | 177.31        | 193.57        | 699.98      |
| CONNECTICUT          | 433.95        | 455.46        | 449.64        | 482.06        | 1,821.11    |
| DELAWARE             | 417.77        | 452.53        | 441.83        | 459.23        | 1,771.36    |
| DISTRICT OF COLUMBIA | 457.24        | 453.82        | 473.35        | 541.61        | 1,926.02    |
| FLORIDA              | 260.63        | 274.39        | 280.52        | 291.39        | 1,106.93    |
| GEORGIA              | 166.70        | 176.74        | 180.19        | 190.17        | 713.79      |
| GUAM                 | 0.35          | 0.14          | 0.81          | 0.00          | 1.29        |
| HAWAII               | 150.05        | 153.06        | 160.35        | 168.35        | 631.81      |
| IDAHO                | 247.93        | 267.06        | 272.34        | 289.02        | 1,076.36    |
| ILLINOIS             | 121.58        | 129.49        | 131.16        | 138.78        | 521.02      |
| INDIANA              | 333.69        | 368.79        | 385.24        | 417.68        | 1,505.40    |
| IOWA                 | 62.62         | 66.00         | 69.53         | 73.01         | 271.15      |
| KANSAS               | 90.06         | 98.16         | 99.71         | 107.02        | 394.95      |
| KENTUCKY             | 851.72        | 863.31        | 911.78        | 959.65        | 3,586.46    |
| LOUISIANA            | 439.21        | 465.57        | 476.84        | 485.13        | 1,866.74    |
| MAINE                | 786.61        | 821.48        | 867.81        | 902.60        | 3,378.50    |
| MARYLAND             | 473.23        | 495.87        | 505.51        | 534.27        | 2,008.88    |
| MASSACHUSETTS        | 644.40        | 671.17        | 662.51        | 700.93        | 2,679.01    |
| MICHIGAN             | 294.75        | 308.22        | 308.24        | 324.73        | 1,235.94    |
| MINNESOTA            | 157.35        | 167.37        | 172.90        | 185.15        | 682.76      |
| MISSISSIPPI          | 346.11        | 361.25        | 365.33        | 371.74        | 1,444.44    |
| MISSOURI             | 191.02        | 209.99        | 233.29        | 261.35        | 895.65      |
| MONTANA              | 288.65        | 292.18        | 310.69        | 337.46        | 1,228.98    |
| NEBRASKA             | 76.92         | 80.45         | 80.74         | 88.43         | 326.55      |
| NEVADA               | 132.67        | 137.51        | 143.27        | 152.76        | 566.22      |
| NEW HAMPSHIRE        | 624.40        | 670.43        | 649.77        | 702.29        | 2,646.89    |
| NEW JERSEY           | 301.64        | 317.60        | 310.41        | 333.65        | 1,263.30    |
| NEW MEXICO           | 382.42        | 411.20        | 430.33        | 436.69        | 1,660.64    |
| NEW YORK             | 296.25        | 313.51        | 315.22        | 335.61        | 1,260.59    |
| NORTH CAROLINA       | 378.62        | 418.31        | 417.36        | 463.92        | 1,678.20    |

|                                   |               |               |               |               |                 |
|-----------------------------------|---------------|---------------|---------------|---------------|-----------------|
| NORTH DAKOTA                      | 152.64        | 168.79        | 182.96        | 187.45        | 691.84          |
| OHIO                              | 467.51        | 485.88        | 485.46        | 514.73        | 1,953.57        |
| OKLAHOMA                          | 329.83        | 356.11        | 378.82        | 413.92        | 1,478.67        |
| OREGON                            | 290.86        | 310.61        | 323.71        | 358.40        | 1,283.57        |
| PENNSYLVANIA                      | 531.14        | 570.72        | 568.17        | 612.62        | 2,282.64        |
| PUERTO RICO                       | 57.28         | 56.12         | 56.97         | 57.80         | 228.17          |
| RHODE ISLAND                      | 771.03        | 748.13        | 767.32        | 819.43        | 3,105.91        |
| SOUTH CAROLINA                    | 250.11        | 271.53        | 279.75        | 301.62        | 1,103.00        |
| SOUTH DAKOTA                      | 60.26         | 67.53         | 75.87         | 79.44         | 283.10          |
| TENNESSEE                         | 573.28        | 608.47        | 616.27        | 625.00        | 2,423.02        |
| TEXAS                             | 107.86        | 112.10        | 115.68        | 119.12        | 454.76          |
| UTAH                              | 352.63        | 367.36        | 382.17        | 402.06        | 1,504.23        |
| VERMONT                           | 1,056.11      | 1,053.70      | 1,091.40      | 1,139.98      | 4,341.19        |
| VIRGIN ISLANDS                    | 11.79         | 9.44          | 12.81         | 10.70         | 44.73           |
| VIRGINIA                          | 253.85        | 267.80        | 275.02        | 285.52        | 1,082.19        |
| WASHINGTON                        | 322.16        | 348.81        | 359.88        | 395.64        | 1,426.48        |
| WEST VIRGINIA                     | 849.21        | 850.11        | 875.17        | 908.79        | 3,483.28        |
| WISCONSIN                         | 196.92        | 207.63        | 214.83        | 226.68        | 846.06          |
| WYOMING                           | 243.89        | 231.52        | 231.24        | 243.80        | 950.45          |
| <b>9064 - BUPRENORPHINE - Tot</b> | <b>283.69</b> | <b>299.58</b> | <b>305.42</b> | <b>323.69</b> | <b>1,212.38</b> |

**DRUG: 9143 - OXYCODONE**

| STATE NAME           | Q1 CALC GRAMS | Q2 CALC GRAMS | Q3 CALC GRAMS | Q4 CALC GRAMS | TOTAL GRAMS |
|----------------------|---------------|---------------|---------------|---------------|-------------|
| ALABAMA              | 4,406.72      | 4,220.81      | 4,039.19      | 3,965.38      | 16,632.08   |
| ALASKA               | 4,426.47      | 4,397.16      | 4,260.68      | 3,824.55      | 16,908.86   |
| AMERICAN SAMOA       | 16.39         | 10.25         | 10.25         | 19.12         | 56.01       |
| ARIZONA              | 5,840.12      | 5,445.42      | 5,261.59      | 5,079.19      | 21,626.32   |
| ARKANSAS             | 4,319.76      | 4,099.28      | 3,787.37      | 3,532.15      | 15,738.56   |
| CALIFORNIA           | 2,050.62      | 1,979.49      | 1,888.73      | 1,823.26      | 7,742.11    |
| COLORADO             | 3,969.85      | 3,791.22      | 3,701.66      | 3,643.42      | 15,106.14   |
| CONNECTICUT          | 4,098.81      | 4,010.79      | 3,918.31      | 3,890.65      | 15,918.56   |
| DELAWARE             | 6,858.88      | 6,868.30      | 6,733.04      | 6,541.80      | 27,002.02   |
| DISTRICT OF COLUMBIA | 2,157.10      | 2,092.92      | 2,003.92      | 1,994.27      | 8,248.21    |
| FLORIDA              | 5,295.94      | 5,097.50      | 4,642.46      | 4,614.33      | 19,650.23   |
| GEORGIA              | 4,255.62      | 4,116.27      | 3,985.55      | 3,947.48      | 16,304.92   |
| GUAM                 | 521.80        | 381.20        | 479.88        | 380.19        | 1,763.06    |
| HAWAII               | 2,867.40      | 2,824.25      | 2,649.75      | 2,534.38      | 10,875.78   |
| IDAHO                | 3,582.71      | 3,396.18      | 3,325.04      | 3,279.13      | 13,583.06   |
| ILLINOIS             | 1,111.83      | 1,058.80      | 1,018.95      | 1,011.33      | 4,200.91    |
| INDIANA              | 3,274.80      | 3,091.98      | 2,966.08      | 2,954.24      | 12,287.10   |
| IOWA                 | 1,542.09      | 1,465.90      | 1,423.23      | 1,404.53      | 5,835.75    |

ARCOS 3 - REPORT 03 by GRAMS  
QUARTERLY DRUG DISTRIBUTION BY STATE PER 100K POPULATION

|                                 |                 |                 |                 |                 |                  |
|---------------------------------|-----------------|-----------------|-----------------|-----------------|------------------|
| KANSAS                          | 3,858.49        | 3,733.15        | 3,580.04        | 3,598.71        | 14,770.39        |
| KENTUCKY                        | 4,470.23        | 4,317.47        | 4,144.04        | 4,102.98        | 17,034.72        |
| LOUISIANA                       | 3,829.46        | 3,623.11        | 3,553.99        | 3,479.45        | 14,486.02        |
| MAINE                           | 3,563.57        | 3,418.44        | 3,351.15        | 3,242.10        | 13,575.25        |
| MARYLAND                        | 4,992.28        | 4,777.70        | 4,611.96        | 4,520.84        | 18,902.78        |
| MASSACHUSETTS                   | 3,309.09        | 3,191.36        | 3,047.34        | 3,046.74        | 12,594.53        |
| MICHIGAN                        | 2,629.88        | 2,429.40        | 2,293.44        | 2,211.89        | 9,564.61         |
| MINNESOTA                       | 2,394.64        | 2,303.52        | 2,219.51        | 2,161.05        | 9,078.72         |
| MISSISSIPPI                     | 3,154.59        | 3,044.95        | 2,984.75        | 2,886.47        | 12,070.75        |
| MISSOURI                        | 4,312.90        | 4,049.61        | 3,843.80        | 3,738.22        | 15,944.54        |
| MONTANA                         | 3,401.90        | 3,171.53        | 3,051.44        | 2,994.17        | 12,619.04        |
| NEBRASKA                        | 2,046.45        | 1,997.15        | 1,913.87        | 1,908.59        | 7,866.05         |
| NEVADA                          | 5,848.82        | 5,500.15        | 5,381.20        | 5,300.29        | 22,030.47        |
| NEW HAMPSHIRE                   | 4,214.76        | 4,015.54        | 3,793.86        | 3,677.94        | 15,702.10        |
| NEW JERSEY                      | 4,841.15        | 4,673.38        | 4,514.05        | 4,441.11        | 18,469.69        |
| NEW MEXICO                      | 3,928.14        | 3,818.42        | 3,723.82        | 3,638.70        | 15,109.08        |
| NEW YORK                        | 3,332.17        | 3,264.56        | 3,126.92        | 3,048.60        | 12,772.25        |
| NORTH CAROLINA                  | 5,237.72        | 4,991.81        | 4,871.87        | 5,102.00        | 20,203.41        |
| NORTH DAKOTA                    | 1,953.98        | 1,886.51        | 1,875.34        | 1,841.79        | 7,557.62         |
| OHIO                            | 3,575.57        | 3,443.49        | 3,309.82        | 3,275.88        | 13,604.76        |
| OKLAHOMA                        | 5,389.08        | 5,125.11        | 4,787.25        | 4,280.53        | 19,581.98        |
| OREGON                          | 4,009.05        | 3,902.41        | 3,745.19        | 3,633.55        | 15,290.20        |
| PENNSYLVANIA                    | 5,111.38        | 4,928.25        | 4,716.87        | 4,561.60        | 19,318.10        |
| PUERTO RICO                     | 198.74          | 212.04          | 394.73          | 384.33          | 1,189.84         |
| RHODE ISLAND                    | 3,407.60        | 3,206.25        | 3,047.38        | 3,062.13        | 12,723.36        |
| SOUTH CAROLINA                  | 4,471.24        | 4,210.96        | 4,063.45        | 3,994.96        | 16,740.61        |
| SOUTH DAKOTA                    | 1,868.91        | 1,779.42        | 1,687.69        | 1,620.86        | 6,956.88         |
| TENNESSEE                       | 6,633.85        | 6,451.34        | 6,155.58        | 5,953.82        | 25,194.59        |
| TEXAS                           | 1,224.54        | 1,208.42        | 1,154.68        | 1,150.20        | 4,737.84         |
| UTAH                            | 5,535.54        | 5,324.73        | 5,222.08        | 5,145.19        | 21,227.54        |
| VERMONT                         | 3,330.70        | 3,200.07        | 3,089.56        | 3,007.63        | 12,627.95        |
| VIRGIN ISLANDS                  | 422.43          | 437.45          | 359.58          | 376.31          | 1,595.78         |
| VIRGINIA                        | 3,281.14        | 3,159.90        | 3,068.94        | 3,053.33        | 12,563.30        |
| WASHINGTON                      | 3,839.92        | 3,738.68        | 3,605.33        | 3,534.43        | 14,718.37        |
| WEST VIRGINIA                   | 3,899.03        | 3,641.16        | 3,442.13        | 3,282.94        | 14,265.26        |
| WISCONSIN                       | 3,159.42        | 2,946.84        | 2,789.40        | 2,687.14        | 11,582.80        |
| WYOMING                         | 4,251.18        | 4,056.33        | 3,896.72        | 3,924.45        | 16,128.68        |
| <b>9143 - OXYCODONE - Total</b> | <b>3,494.83</b> | <b>3,356.31</b> | <b>3,212.79</b> | <b>3,152.25</b> | <b>13,216.17</b> |

**DRUG: 9150 - HYDROMORPHONE**

| STATE NAME | Q1 CALC GRAMS | Q2 CALC GRAMS | Q3 CALC GRAMS | Q4 CALC GRAMS | TOTAL GRAMS |
|------------|---------------|---------------|---------------|---------------|-------------|
|------------|---------------|---------------|---------------|---------------|-------------|

ARCOS 3 - REPORT 03 by GRAMS  
QUARTERLY DRUG DISTRIBUTION BY STATE PER 100K POPULATION

|                      |        |        |        |        |        |
|----------------------|--------|--------|--------|--------|--------|
| ALABAMA              | 58.11  | 59.04  | 54.34  | 49.06  | 220.55 |
| ALASKA               | 134.91 | 106.57 | 107.89 | 87.58  | 436.95 |
| AMERICAN SAMOA       | 0.27   | 0.05   | 1.11   | 0.41   | 1.83   |
| ARIZONA              | 96.20  | 87.42  | 84.88  | 79.10  | 347.61 |
| ARKANSAS             | 96.41  | 87.14  | 81.12  | 78.20  | 342.86 |
| CALIFORNIA           | 93.32  | 87.71  | 80.63  | 76.38  | 338.03 |
| COLORADO             | 129.40 | 116.01 | 112.10 | 111.32 | 468.82 |
| CONNECTICUT          | 164.93 | 141.55 | 131.24 | 131.81 | 569.53 |
| DELAWARE             | 202.08 | 184.14 | 169.33 | 165.26 | 720.81 |
| DISTRICT OF COLUMBIA | 76.40  | 62.25  | 75.17  | 67.64  | 281.46 |
| FLORIDA              | 232.71 | 210.04 | 197.63 | 186.80 | 827.18 |
| GEORGIA              | 74.45  | 75.02  | 67.88  | 62.01  | 279.35 |
| GUAM                 | 15.85  | 9.65   | 17.21  | 8.02   | 50.73  |
| HAWAII               | 40.19  | 38.84  | 36.19  | 36.33  | 151.54 |
| IDAHO                | 118.89 | 119.45 | 106.27 | 103.08 | 447.69 |
| ILLINOIS             | 69.32  | 64.26  | 60.72  | 59.21  | 253.52 |
| INDIANA              | 83.77  | 76.92  | 69.33  | 65.52  | 295.54 |
| IOWA                 | 86.10  | 78.94  | 74.72  | 74.69  | 314.45 |
| KANSAS               | 103.65 | 98.16  | 101.34 | 95.84  | 399.00 |
| KENTUCKY             | 58.65  | 55.89  | 50.16  | 53.34  | 218.04 |
| LOUISIANA            | 64.88  | 62.44  | 59.57  | 52.94  | 239.82 |
| MAINE                | 122.19 | 114.49 | 92.98  | 108.57 | 438.23 |
| MARYLAND             | 124.91 | 110.78 | 108.23 | 105.12 | 449.05 |
| MASSACHUSETTS        | 105.21 | 105.29 | 94.42  | 90.55  | 395.47 |
| MICHIGAN             | 77.45  | 75.93  | 65.47  | 63.50  | 282.34 |
| MINNESOTA            | 100.85 | 94.96  | 93.98  | 91.72  | 381.51 |
| MISSISSIPPI          | 151.57 | 210.66 | 181.62 | 149.93 | 693.78 |
| MISSOURI             | 96.95  | 84.08  | 78.28  | 78.50  | 337.81 |
| MONTANA              | 163.89 | 135.81 | 137.30 | 130.32 | 567.32 |
| NEBRASKA             | 59.35  | 59.30  | 59.52  | 57.98  | 236.15 |
| NEVADA               | 92.63  | 81.45  | 85.60  | 83.02  | 342.71 |
| NEW HAMPSHIRE        | 132.72 | 132.05 | 114.99 | 121.18 | 500.94 |
| NEW JERSEY           | 88.98  | 81.42  | 82.95  | 81.19  | 334.54 |
| NEW MEXICO           | 55.74  | 54.58  | 56.52  | 51.75  | 218.59 |
| NEW YORK             | 89.49  | 86.82  | 82.64  | 78.69  | 337.64 |
| NORTH CAROLINA       | 101.79 | 91.90  | 97.90  | 90.07  | 381.65 |
| NORTH DAKOTA         | 82.79  | 81.16  | 92.04  | 96.78  | 352.78 |
| OHIO                 | 76.17  | 64.94  | 59.40  | 60.28  | 260.79 |
| OKLAHOMA             | 89.74  | 85.96  | 84.55  | 72.98  | 333.24 |
| OREGON               | 116.99 | 106.93 | 98.24  | 98.12  | 420.29 |

|                                 |               |              |              |              |               |
|---------------------------------|---------------|--------------|--------------|--------------|---------------|
| PENNSYLVANIA                    | 115.62        | 100.41       | 87.33        | 86.88        | 390.24        |
| PUERTO RICO                     | 1.38          | 1.79         | 1.49         | 1.51         | 6.16          |
| RHODE ISLAND                    | 77.79         | 70.41        | 58.89        | 54.06        | 261.15        |
| SOUTH CAROLINA                  | 109.89        | 107.67       | 106.87       | 95.47        | 419.89        |
| SOUTH DAKOTA                    | 64.58         | 58.18        | 59.82        | 60.40        | 242.98        |
| TENNESSEE                       | 120.79        | 71.00        | 78.00        | 76.75        | 346.54        |
| TEXAS                           | 86.98         | 77.30        | 75.34        | 74.80        | 314.43        |
| UTAH                            | 101.74        | 77.63        | 88.17        | 82.30        | 349.84        |
| VERMONT                         | 171.83        | 173.78       | 146.36       | 147.02       | 639.00        |
| VIRGIN ISLANDS                  | 9.89          | 12.11        | 14.85        | 12.59        | 49.45         |
| VIRGINIA                        | 122.42        | 113.78       | 107.55       | 103.22       | 446.98        |
| WASHINGTON                      | 144.48        | 132.99       | 123.34       | 123.93       | 524.74        |
| WEST VIRGINIA                   | 63.75         | 60.33        | 56.17        | 58.49        | 238.74        |
| WISCONSIN                       | 62.48         | 57.42        | 49.25        | 46.27        | 215.43        |
| WYOMING                         | 99.72         | 100.10       | 85.96        | 87.65        | 373.43        |
| <b>9150 - HYDROMORPHONE - T</b> | <b>102.14</b> | <b>93.86</b> | <b>88.59</b> | <b>85.06</b> | <b>369.65</b> |

**DRUG: 9193 - HYDROCODONE**

| STATE NAME           | Q1 CALC GRAMS | Q2 CALC GRAMS | Q3 CALC GRAMS | Q4 CALC GRAMS | TOTAL GRAMS |
|----------------------|---------------|---------------|---------------|---------------|-------------|
| ALABAMA              | 4,672.85      | 4,493.46      | 4,364.39      | 4,336.18      | 17,866.88   |
| ALASKA               | 1,382.87      | 1,327.54      | 1,270.72      | 1,217.29      | 5,198.42    |
| AMERICAN SAMOA       | 5.53          | 0.00          | 0.00          | 0.00          | 5.53        |
| ARIZONA              | 1,463.08      | 1,364.07      | 1,325.72      | 1,302.52      | 5,455.39    |
| ARKANSAS             | 4,144.96      | 3,952.30      | 3,793.85      | 3,717.22      | 15,608.33   |
| CALIFORNIA           | 2,225.27      | 2,132.80      | 2,055.69      | 1,998.42      | 8,412.18    |
| COLORADO             | 1,152.95      | 1,090.45      | 1,047.00      | 1,037.33      | 4,327.73    |
| CONNECTICUT          | 507.03        | 468.96        | 453.80        | 457.23        | 1,887.02    |
| DELAWARE             | 576.21        | 571.79        | 546.52        | 539.75        | 2,234.28    |
| DISTRICT OF COLUMBIA | 225.63        | 184.69        | 179.16        | 175.33        | 764.80      |
| FLORIDA              | 1,809.31      | 1,677.50      | 1,446.77      | 1,462.02      | 6,395.61    |
| GEORGIA              | 2,297.52      | 2,198.21      | 2,100.21      | 2,104.17      | 8,700.11    |
| GUAM                 | 79.92         | 56.74         | 76.19         | 65.39         | 278.24      |
| HAWAII               | 1,198.58      | 1,144.64      | 1,059.03      | 1,038.76      | 4,441.02    |
| IDAHO                | 3,329.88      | 3,251.16      | 3,149.94      | 3,095.47      | 12,826.45   |
| ILLINOIS             | 2,110.58      | 2,029.28      | 1,941.34      | 1,946.99      | 8,028.19    |
| INDIANA              | 3,179.64      | 3,035.18      | 2,930.93      | 2,938.53      | 12,084.28   |
| IOWA                 | 1,653.71      | 1,584.12      | 1,521.75      | 1,518.15      | 6,277.74    |
| KANSAS               | 2,561.62      | 2,467.66      | 2,367.57      | 2,360.84      | 9,757.69    |
| KENTUCKY             | 4,334.53      | 4,172.58      | 4,050.86      | 4,069.83      | 16,627.79   |
| LOUISIANA            | 3,247.09      | 3,083.10      | 3,004.58      | 2,992.71      | 12,327.48   |
| MAINE                | 1,188.23      | 1,141.43      | 1,124.34      | 1,091.84      | 4,545.84    |

|                                   |                 |                 |                 |                 |                 |
|-----------------------------------|-----------------|-----------------|-----------------|-----------------|-----------------|
| MARYLAND                          | 524.03          | 504.43          | 470.21          | 472.94          | 1,971.62        |
| MASSACHUSETTS                     | 416.23          | 394.41          | 371.94          | 372.71          | 1,555.29        |
| MICHIGAN                          | 3,411.95        | 3,144.87        | 2,935.48        | 2,900.45        | 12,392.74       |
| MINNESOTA                         | 742.52          | 710.89          | 688.11          | 671.86          | 2,813.38        |
| MISSISSIPPI                       | 3,337.51        | 3,108.80        | 2,966.50        | 2,856.31        | 12,269.11       |
| MISSOURI                          | 2,592.91        | 2,489.46        | 2,389.17        | 2,337.10        | 9,808.65        |
| MONTANA                           | 2,399.93        | 2,284.51        | 2,259.62        | 2,192.31        | 9,136.37        |
| NEBRASKA                          | 1,553.41        | 1,518.65        | 1,444.79        | 1,439.13        | 5,955.98        |
| NEVADA                            | 2,931.81        | 2,808.34        | 2,732.67        | 2,675.39        | 11,148.21       |
| NEW HAMPSHIRE                     | 626.09          | 584.57          | 577.04          | 577.44          | 2,365.13        |
| NEW JERSEY                        | 347.01          | 324.56          | 308.35          | 314.29          | 1,294.22        |
| NEW MEXICO                        | 1,569.84        | 1,477.56        | 1,430.92        | 1,436.64        | 5,914.95        |
| NEW YORK                          | 786.03          | 755.92          | 722.94          | 722.19          | 2,987.09        |
| NORTH CAROLINA                    | 1,764.50        | 1,633.90        | 1,570.08        | 1,650.79        | 6,619.27        |
| NORTH DAKOTA                      | 1,388.62        | 1,309.39        | 1,315.12        | 1,266.63        | 5,279.76        |
| OHIO                              | 1,364.46        | 1,293.53        | 1,233.14        | 1,232.58        | 5,123.72        |
| OKLAHOMA                          | 4,337.81        | 4,266.95        | 4,058.39        | 3,790.35        | 16,453.50       |
| OREGON                            | 2,208.31        | 2,149.05        | 2,077.53        | 2,027.24        | 8,462.12        |
| PENNSYLVANIA                      | 1,128.60        | 1,073.99        | 1,038.67        | 990.78          | 4,232.05        |
| PUERTO RICO                       | 10.02           | 9.25            | 16.29           | 13.83           | 49.40           |
| RHODE ISLAND                      | 868.65          | 824.34          | 794.03          | 776.37          | 3,263.39        |
| SOUTH CAROLINA                    | 2,656.83        | 2,485.80        | 2,363.70        | 2,360.29        | 9,866.62        |
| SOUTH DAKOTA                      | 1,539.66        | 1,479.61        | 1,433.38        | 1,422.22        | 5,874.86        |
| TENNESSEE                         | 3,489.23        | 3,336.09        | 3,149.42        | 3,046.50        | 13,021.24       |
| TEXAS                             | 2,408.78        | 2,340.61        | 2,268.67        | 2,253.35        | 9,271.40        |
| UTAH                              | 1,922.14        | 1,835.58        | 1,776.85        | 1,801.07        | 7,335.65        |
| VERMONT                           | 681.45          | 661.05          | 643.95          | 636.61          | 2,623.06        |
| VIRGIN ISLANDS                    | 259.97          | 201.43          | 204.68          | 216.07          | 882.14          |
| VIRGINIA                          | 1,137.91        | 1,065.79        | 1,020.44        | 1,032.03        | 4,256.16        |
| WASHINGTON                        | 1,741.19        | 1,696.12        | 1,629.01        | 1,610.23        | 6,676.56        |
| WEST VIRGINIA                     | 2,743.06        | 2,543.98        | 2,402.45        | 2,301.89        | 9,991.38        |
| WISCONSIN                         | 1,210.30        | 1,196.36        | 1,170.96        | 1,156.14        | 4,733.76        |
| WYOMING                           | 1,781.35        | 1,748.91        | 1,689.21        | 1,676.30        | 6,895.77        |
| <b>9193 - HYDROCODONE - Total</b> | <b>1,943.10</b> | <b>1,853.56</b> | <b>1,770.69</b> | <b>1,751.24</b> | <b>7,318.59</b> |

**DRUG: 9230 - MEPERIDINE (PETHIDINE)**

| STATE NAME | Q1 CALC GRAMS | Q2 CALC GRAMS | Q3 CALC GRAMS | Q4 CALC GRAMS | TOTAL GRAMS |
|------------|---------------|---------------|---------------|---------------|-------------|
| ALABAMA    | 165.33        | 145.29        | 122.61        | 94.52         | 527.76      |
| ALASKA     | 93.93         | 62.93         | 54.60         | 41.41         | 252.88      |
| ARIZONA    | 84.30         | 77.61         | 69.45         | 55.92         | 287.28      |
| ARKANSAS   | 231.57        | 206.76        | 190.26        | 148.00        | 776.59      |

ARCOS 3 - REPORT 03 by GRAMS  
QUARTERLY DRUG DISTRIBUTION BY STATE PER 100K POPULATION

|                      |        |        |        |        |        |
|----------------------|--------|--------|--------|--------|--------|
| CALIFORNIA           | 53.60  | 47.45  | 35.56  | 29.93  | 166.53 |
| COLORADO             | 31.89  | 31.25  | 27.31  | 22.69  | 113.14 |
| CONNECTICUT          | 30.82  | 24.76  | 24.40  | 23.39  | 103.38 |
| DELAWARE             | 24.92  | 11.89  | 10.86  | 14.74  | 62.41  |
| DISTRICT OF COLUMBIA | 23.99  | 27.34  | 21.63  | 32.68  | 105.64 |
| FLORIDA              | 51.25  | 44.30  | 34.54  | 29.12  | 159.21 |
| GEORGIA              | 106.02 | 97.72  | 78.76  | 62.89  | 345.39 |
| GUAM                 | 7.94   | 20.15  | 22.90  | 16.79  | 67.77  |
| HAWAII               | 18.17  | 29.57  | 25.91  | 17.10  | 90.75  |
| IDAHO                | 47.33  | 49.62  | 36.59  | 44.30  | 177.84 |
| ILLINOIS             | 21.96  | 21.97  | 17.26  | 13.73  | 74.92  |
| INDIANA              | 48.54  | 47.20  | 41.60  | 28.38  | 165.71 |
| IOWA                 | 61.10  | 62.05  | 42.52  | 50.58  | 216.25 |
| KANSAS               | 54.13  | 52.99  | 47.92  | 35.03  | 190.07 |
| KENTUCKY             | 65.40  | 55.60  | 41.72  | 34.28  | 197.00 |
| LOUISIANA            | 153.67 | 143.14 | 113.57 | 87.55  | 497.93 |
| MAINE                | 26.59  | 25.21  | 23.86  | 23.21  | 98.87  |
| MARYLAND             | 38.40  | 37.55  | 29.91  | 27.48  | 133.34 |
| MASSACHUSETTS        | 32.03  | 27.39  | 24.03  | 22.96  | 106.42 |
| MICHIGAN             | 29.24  | 25.75  | 18.60  | 21.12  | 94.71  |
| MINNESOTA            | 11.05  | 12.85  | 7.99   | 8.67   | 40.56  |
| MISSISSIPPI          | 132.36 | 125.21 | 108.05 | 88.09  | 453.71 |
| MISSOURI             | 54.92  | 51.67  | 41.44  | 40.90  | 188.93 |
| MONTANA              | 65.11  | 58.30  | 49.33  | 32.87  | 205.61 |
| NEBRASKA             | 32.67  | 26.01  | 24.04  | 23.32  | 106.03 |
| NEVADA               | 63.13  | 51.55  | 39.09  | 35.56  | 189.34 |
| NEW HAMPSHIRE        | 48.96  | 43.58  | 36.00  | 37.73  | 166.28 |
| NEW JERSEY           | 20.42  | 18.82  | 17.01  | 15.07  | 71.32  |
| NEW MEXICO           | 78.07  | 72.11  | 58.17  | 39.10  | 247.44 |
| NEW YORK             | 24.91  | 22.21  | 18.23  | 15.79  | 81.14  |
| NORTH CAROLINA       | 52.92  | 50.44  | 43.49  | 39.36  | 186.21 |
| NORTH DAKOTA         | 26.76  | 23.89  | 32.72  | 28.59  | 111.95 |
| OHIO                 | 47.83  | 37.32  | 28.89  | 29.80  | 143.85 |
| OKLAHOMA             | 180.00 | 147.90 | 138.03 | 101.17 | 567.10 |
| OREGON               | 31.32  | 33.91  | 30.78  | 23.29  | 119.30 |
| PENNSYLVANIA         | 27.81  | 25.19  | 20.67  | 18.64  | 92.31  |
| PUERTO RICO          | 65.66  | 59.69  | 113.69 | 95.99  | 335.03 |
| RHODE ISLAND         | 16.82  | 21.48  | 16.20  | 8.02   | 62.51  |
| SOUTH CAROLINA       | 111.00 | 98.20  | 90.19  | 73.90  | 373.29 |
| SOUTH DAKOTA         | 65.32  | 73.05  | 52.38  | 40.54  | 231.30 |

ARCOS 3 - REPORT 03 by GRAMS  
QUARTERLY DRUG DISTRIBUTION BY STATE PER 100K POPULATION

|                                     |              |              |              |              |               |
|-------------------------------------|--------------|--------------|--------------|--------------|---------------|
| TENNESSEE                           | 115.40       | 96.90        | 77.06        | 58.30        | 347.67        |
| TEXAS                               | 53.83        | 46.19        | 33.93        | 32.53        | 166.49        |
| UTAH                                | 61.88        | 67.69        | 49.92        | 49.64        | 229.14        |
| VERMONT                             | 56.62        | 48.22        | 28.46        | 35.52        | 168.82        |
| VIRGIN ISLANDS                      | 110.10       | 141.84       | 139.36       | 27.77        | 419.09        |
| VIRGINIA                            | 71.45        | 61.35        | 53.74        | 48.42        | 234.95        |
| WASHINGTON                          | 48.46        | 48.92        | 36.86        | 35.38        | 169.62        |
| WEST VIRGINIA                       | 38.59        | 30.60        | 20.75        | 17.05        | 106.99        |
| WISCONSIN                           | 21.89        | 21.62        | 14.26        | 13.16        | 70.93         |
| WYOMING                             | 59.18        | 54.41        | 55.18        | 53.64        | 222.41        |
| <b>9230 - MEPERIDINE (PETHIDIN)</b> | <b>56.21</b> | <b>50.53</b> | <b>41.86</b> | <b>35.69</b> | <b>184.30</b> |

**DRUG: 9250B - METHADONE**

| STATE NAME           | Q1 CALC GRAMS | Q2 CALC GRAMS | Q3 CALC GRAMS | Q4 CALC GRAMS | TOTAL GRAMS |
|----------------------|---------------|---------------|---------------|---------------|-------------|
| ALABAMA              | 1,420.88      | 1,449.27      | 1,548.38      | 1,573.96      | 5,992.49    |
| ALASKA               | 1,160.00      | 1,119.95      | 1,262.28      | 1,101.83      | 4,644.07    |
| ARIZONA              | 1,379.83      | 1,395.54      | 1,441.26      | 1,305.74      | 5,522.38    |
| ARKANSAS             | 509.14        | 465.65        | 466.97        | 399.43        | 1,841.19    |
| CALIFORNIA           | 890.44        | 813.28        | 861.80        | 682.07        | 3,247.59    |
| COLORADO             | 922.84        | 890.29        | 937.46        | 829.19        | 3,579.78    |
| CONNECTICUT          | 3,009.20      | 3,070.44      | 3,248.71      | 2,337.37      | 11,665.72   |
| DELAWARE             | 3,495.77      | 3,879.57      | 3,274.91      | 3,261.08      | 13,911.33   |
| DISTRICT OF COLUMBIA | 1,550.98      | 1,442.05      | 1,726.26      | 1,165.78      | 5,885.07    |
| FLORIDA              | 1,063.86      | 886.53        | 1,014.10      | 1,051.35      | 4,015.84    |
| GEORGIA              | 1,259.85      | 1,075.60      | 1,185.06      | 1,116.68      | 4,637.19    |
| GUAM                 | 23.81         | 24.56         | 18.80         | 24.31         | 91.48       |
| HAWAII               | 611.15        | 365.69        | 604.75        | 469.06        | 2,050.65    |
| IDAHO                | 752.71        | 628.84        | 631.19        | 632.37        | 2,645.11    |
| ILLINOIS             | 975.48        | 880.54        | 991.80        | 859.78        | 3,707.61    |
| INDIANA              | 1,250.28      | 1,171.72      | 1,205.10      | 1,004.80      | 4,631.91    |
| IOWA                 | 409.12        | 430.53        | 410.34        | 363.84        | 1,613.83    |
| KANSAS               | 721.19        | 792.89        | 681.09        | 731.50        | 2,926.66    |
| KENTUCKY             | 1,180.71      | 1,151.07      | 1,179.92      | 1,076.92      | 4,588.61    |
| LOUISIANA            | 796.64        | 768.00        | 766.47        | 719.48        | 3,050.60    |
| MAINE                | 2,319.44      | 1,757.36      | 2,245.67      | 1,681.24      | 8,003.71    |
| MARYLAND             | 3,250.39      | 2,943.61      | 3,184.52      | 3,025.23      | 12,403.75   |
| MASSACHUSETTS        | 2,193.94      | 1,875.54      | 2,173.08      | 1,680.85      | 7,923.41    |
| MICHIGAN             | 1,280.77      | 1,292.06      | 1,257.15      | 1,125.43      | 4,955.40    |
| MINNESOTA            | 1,034.11      | 1,101.46      | 1,062.21      | 932.99        | 4,130.76    |
| MISSISSIPPI          | 235.89        | 277.91        | 221.11        | 253.98        | 988.90      |
| MISSOURI             | 619.21        | 676.13        | 598.41        | 561.91        | 2,455.67    |



|                                  |                 |                 |                 |                 |                 |
|----------------------------------|-----------------|-----------------|-----------------|-----------------|-----------------|
| MONTANA                          | 764.70          | 806.23          | 857.27          | 808.02          | 3,236.23        |
| NEBRASKA                         | 391.38          | 355.04          | 434.37          | 371.71          | 1,552.50        |
| NEVADA                           | 1,329.64        | 1,238.19        | 1,252.01        | 1,237.17        | 5,057.01        |
| NEW HAMPSHIRE                    | 2,437.91        | 2,369.65        | 2,238.91        | 2,058.93        | 9,105.40        |
| NEW JERSEY                       | 1,311.84        | 1,315.51        | 1,380.68        | 1,320.92        | 5,328.95        |
| NEW MEXICO                       | 2,028.31        | 2,037.17        | 2,225.25        | 2,037.17        | 8,327.90        |
| NEW YORK                         | 1,519.22        | 1,452.35        | 1,621.25        | 1,221.06        | 5,813.88        |
| NORTH CAROLINA                   | 1,424.20        | 1,263.30        | 1,391.24        | 1,247.17        | 5,325.91        |
| NORTH DAKOTA                     | 472.21          | 548.88          | 703.92          | 635.12          | 2,360.13        |
| OHIO                             | 619.84          | 631.27          | 635.14          | 661.64          | 2,547.88        |
| OKLAHOMA                         | 988.63          | 796.33          | 975.47          | 904.31          | 3,664.73        |
| OREGON                           | 1,662.30        | 1,394.60        | 1,562.02        | 1,319.73        | 5,938.65        |
| PENNSYLVANIA                     | 1,491.80        | 1,395.99        | 1,472.48        | 1,261.41        | 5,621.69        |
| PUERTO RICO                      | 547.81          | 578.70          | 583.71          | 620.44          | 2,330.65        |
| RHODE ISLAND                     | 4,206.08        | 4,526.33        | 3,527.08        | 3,810.84        | 16,070.33       |
| SOUTH CAROLINA                   | 1,167.45        | 1,058.13        | 1,164.92        | 913.20          | 4,303.71        |
| SOUTH DAKOTA                     | 247.93          | 244.94          | 252.62          | 186.85          | 932.33          |
| TENNESSEE                        | 787.95          | 727.60          | 806.55          | 718.51          | 3,040.60        |
| TEXAS                            | 545.81          | 486.14          | 544.48          | 486.13          | 2,062.57        |
| UTAH                             | 1,018.08        | 844.75          | 952.97          | 712.69          | 3,528.49        |
| VERMONT                          | 3,209.72        | 2,492.36        | 3,137.04        | 2,651.58        | 11,490.71       |
| VIRGIN ISLANDS                   | 1.63            | 3.26            | 8.96            | 500.03          | 513.88          |
| VIRGINIA                         | 1,037.21        | 990.00          | 1,032.10        | 919.23          | 3,978.54        |
| WASHINGTON                       | 1,462.97        | 1,245.89        | 1,500.04        | 1,315.47        | 5,524.38        |
| WEST VIRGINIA                    | 1,225.64        | 1,088.06        | 1,259.40        | 915.25          | 4,488.35        |
| WISCONSIN                        | 1,081.69        | 1,027.37        | 1,110.27        | 771.63          | 3,990.97        |
| WYOMING                          | 186.03          | 165.32          | 155.75          | 159.56          | 666.66          |
| <b>9250B - METHADONE - Total</b> | <b>1,157.16</b> | <b>1,078.22</b> | <b>1,155.15</b> | <b>1,010.59</b> | <b>4,401.11</b> |

**DRUG: 9300 - MORPHINE**

| STATE NAME           | Q1 CALC GRAMS | Q2 CALC GRAMS | Q3 CALC GRAMS | Q4 CALC GRAMS | TOTAL GRAMS |
|----------------------|---------------|---------------|---------------|---------------|-------------|
| ALABAMA              | 1,333.75      | 1,266.03      | 1,217.41      | 1,210.64      | 5,027.82    |
| ALASKA               | 1,520.56      | 1,476.19      | 1,455.75      | 1,283.63      | 5,736.13    |
| AMERICAN SAMOA       | 10.31         | 38.27         | 18.56         | 6.88          | 74.02       |
| ARIZONA              | 2,139.26      | 1,950.04      | 1,829.00      | 1,705.30      | 7,623.61    |
| ARKANSAS             | 1,334.14      | 1,237.75      | 1,136.55      | 1,086.49      | 4,794.93    |
| CALIFORNIA           | 1,073.98      | 1,007.37      | 961.27        | 930.17        | 3,972.79    |
| COLORADO             | 1,381.26      | 1,277.62      | 1,243.38      | 1,172.17      | 5,074.42    |
| CONNECTICUT          | 919.08        | 877.40        | 831.87        | 816.74        | 3,445.09    |
| DELAWARE             | 2,230.18      | 2,081.01      | 1,951.70      | 1,847.73      | 8,110.62    |
| DISTRICT OF COLUMBIA | 612.90        | 453.64        | 496.77        | 410.31        | 1,973.62    |

ARCOS 3 - REPORT 03 by GRAMS  
 QUARTERLY DRUG DISTRIBUTION BY STATE PER 100K POPULATION

|                |          |          |          |          |          |
|----------------|----------|----------|----------|----------|----------|
| FLORIDA        | 1,973.42 | 1,887.38 | 1,725.74 | 1,680.65 | 7,267.18 |
| GEORGIA        | 1,081.84 | 1,038.79 | 1,010.28 | 962.76   | 4,093.67 |
| GUAM           | 563.40   | 463.46   | 431.15   | 428.84   | 1,886.84 |
| HAWAII         | 1,360.77 | 1,380.74 | 1,249.68 | 1,165.22 | 5,156.41 |
| IDAHO          | 1,636.25 | 1,590.45 | 1,529.48 | 1,431.98 | 6,188.16 |
| ILLINOIS       | 741.76   | 711.96   | 686.04   | 685.09   | 2,824.85 |
| INDIANA        | 1,192.79 | 1,129.64 | 1,054.75 | 1,028.92 | 4,406.10 |
| IOWA           | 1,003.78 | 949.77   | 926.14   | 911.12   | 3,790.81 |
| KANSAS         | 1,418.60 | 1,363.93 | 1,284.90 | 1,258.15 | 5,325.58 |
| KENTUCKY       | 963.99   | 915.25   | 852.51   | 855.65   | 3,587.39 |
| LOUISIANA      | 1,075.54 | 1,034.75 | 1,006.57 | 958.68   | 4,075.54 |
| MAINE          | 1,109.11 | 1,081.67 | 1,036.95 | 1,022.04 | 4,249.77 |
| MARYLAND       | 1,167.01 | 1,093.32 | 1,000.38 | 957.93   | 4,218.64 |
| MASSACHUSETTS  | 929.47   | 902.30   | 846.98   | 849.04   | 3,527.81 |
| MICHIGAN       | 1,640.73 | 1,555.57 | 1,454.48 | 1,394.85 | 6,045.62 |
| MINNESOTA      | 778.78   | 738.30   | 716.45   | 688.06   | 2,921.59 |
| MISSISSIPPI    | 1,177.82 | 1,150.01 | 1,096.64 | 1,015.57 | 4,440.05 |
| MISSOURI       | 1,455.51 | 1,344.27 | 1,298.63 | 1,259.86 | 5,358.27 |
| MONTANA        | 1,613.92 | 1,541.16 | 1,504.89 | 1,326.66 | 5,986.63 |
| NEBRASKA       | 949.02   | 955.48   | 899.76   | 874.36   | 3,678.61 |
| NEVADA         | 1,878.24 | 1,736.86 | 1,701.05 | 1,575.06 | 6,891.20 |
| NEW HAMPSHIRE  | 1,291.74 | 1,298.41 | 1,187.59 | 1,188.52 | 4,966.27 |
| NEW JERSEY     | 854.96   | 822.89   | 777.85   | 765.81   | 3,221.51 |
| NEW MEXICO     | 1,118.28 | 1,042.38 | 1,001.49 | 1,012.76 | 4,174.91 |
| NEW YORK       | 723.21   | 699.67   | 671.08   | 647.04   | 2,741.01 |
| NORTH CAROLINA | 1,153.28 | 1,102.45 | 1,076.35 | 1,106.25 | 4,438.33 |
| NORTH DAKOTA   | 843.29   | 780.26   | 795.58   | 781.60   | 3,200.73 |
| OHIO           | 922.52   | 870.12   | 815.43   | 820.22   | 3,428.29 |
| OKLAHOMA       | 2,163.91 | 1,945.67 | 1,798.87 | 1,543.37 | 7,451.82 |
| OREGON         | 1,628.86 | 1,571.08 | 1,524.76 | 1,457.70 | 6,182.40 |
| PENNSYLVANIA   | 1,647.98 | 1,484.47 | 1,575.92 | 1,286.00 | 5,994.37 |
| PUERTO RICO    | 38.42    | 36.11    | 53.81    | 55.11    | 183.45   |
| RHODE ISLAND   | 984.45   | 901.79   | 836.85   | 881.41   | 3,604.50 |
| SOUTH CAROLINA | 1,313.45 | 1,261.82 | 1,222.47 | 1,217.91 | 5,015.65 |
| SOUTH DAKOTA   | 943.84   | 888.76   | 878.90   | 811.18   | 3,522.67 |
| TENNESSEE      | 2,272.34 | 2,083.09 | 2,133.86 | 1,655.35 | 8,144.64 |
| TEXAS          | 754.89   | 718.29   | 682.54   | 658.78   | 2,814.50 |
| UTAH           | 1,656.19 | 1,549.34 | 1,513.87 | 1,457.08 | 6,176.47 |
| VERMONT        | 1,531.68 | 1,502.65 | 1,424.32 | 1,412.17 | 5,870.82 |
| VIRGIN ISLANDS | 88.26    | 121.74   | 122.36   | 97.19    | 429.56   |

|                                |                 |                 |                 |                 |                 |
|--------------------------------|-----------------|-----------------|-----------------|-----------------|-----------------|
| VIRGINIA                       | 883.12          | 860.25          | 818.05          | 818.57          | 3,379.99        |
| WASHINGTON                     | 1,433.87        | 1,399.38        | 1,330.12        | 1,273.12        | 5,436.48        |
| WEST VIRGINIA                  | 1,026.17        | 972.10          | 946.72          | 900.39          | 3,845.38        |
| WISCONSIN                      | 1,201.23        | 1,156.99        | 1,078.70        | 1,074.34        | 4,511.26        |
| WYOMING                        | 1,481.10        | 1,393.01        | 1,318.16        | 1,216.86        | 5,409.12        |
| <b>9300 - MORPHINE - Total</b> | <b>1,197.75</b> | <b>1,132.28</b> | <b>1,083.76</b> | <b>1,031.32</b> | <b>4,445.11</b> |

**DRUG: 9652 - OXYMORPHONE**

| STATE NAME           | Q1 CALC GRAMS | Q2 CALC GRAMS | Q3 CALC GRAMS | Q4 CALC GRAMS | TOTAL GRAMS |
|----------------------|---------------|---------------|---------------|---------------|-------------|
| ALABAMA              | 49.88         | 45.31         | 40.65         | 40.97         | 176.81      |
| ALASKA               | 23.65         | 22.30         | 17.28         | 13.21         | 76.44       |
| ARIZONA              | 41.85         | 34.17         | 32.76         | 27.61         | 136.39      |
| ARKANSAS             | 24.35         | 18.22         | 14.79         | 12.64         | 70.01       |
| CALIFORNIA           | 18.22         | 15.52         | 14.52         | 13.63         | 61.89       |
| COLORADO             | 31.89         | 28.40         | 26.10         | 24.92         | 111.31      |
| CONNECTICUT          | 40.15         | 40.14         | 35.27         | 34.79         | 150.35      |
| DELAWARE             | 163.82        | 165.58        | 163.07        | 161.22        | 653.70      |
| DISTRICT OF COLUMBIA | 16.32         | 10.14         | 8.41          | 8.65          | 43.52       |
| FLORIDA              | 60.74         | 56.60         | 51.26         | 49.35         | 217.95      |
| GEORGIA              | 33.03         | 29.59         | 28.54         | 26.61         | 117.78      |
| HAWAII               | 18.79         | 13.33         | 15.13         | 16.03         | 63.27       |
| IDAHO                | 50.88         | 47.89         | 42.68         | 42.69         | 184.14      |
| ILLINOIS             | 16.28         | 14.28         | 13.61         | 14.14         | 58.30       |
| INDIANA              | 38.61         | 34.22         | 32.49         | 29.96         | 135.28      |
| IOWA                 | 17.28         | 15.25         | 12.38         | 11.74         | 56.65       |
| KANSAS               | 31.14         | 28.84         | 26.13         | 26.67         | 112.78      |
| KENTUCKY             | 48.87         | 43.95         | 39.86         | 37.60         | 170.28      |
| LOUISIANA            | 93.58         | 87.88         | 83.54         | 79.25         | 344.25      |
| MAINE                | 44.47         | 32.80         | 30.05         | 27.29         | 134.61      |
| MARYLAND             | 110.10        | 102.22        | 97.51         | 96.21         | 406.04      |
| MASSACHUSETTS        | 17.22         | 15.81         | 15.14         | 14.79         | 62.97       |
| MICHIGAN             | 145.13        | 124.20        | 108.93        | 93.80         | 472.06      |
| MINNESOTA            | 4.30          | 4.04          | 3.91          | 4.06          | 16.32       |
| MISSISSIPPI          | 59.46         | 48.92         | 44.14         | 44.16         | 196.67      |
| MISSOURI             | 33.74         | 28.39         | 26.06         | 27.22         | 115.42      |
| MONTANA              | 13.47         | 12.73         | 13.99         | 12.18         | 52.37       |
| NEBRASKA             | 33.83         | 28.82         | 28.29         | 24.86         | 115.80      |
| NEVADA               | 72.97         | 60.30         | 57.11         | 49.78         | 240.16      |
| NEW HAMPSHIRE        | 35.72         | 36.01         | 31.14         | 24.53         | 127.41      |
| NEW JERSEY           | 42.52         | 38.33         | 34.39         | 34.39         | 149.63      |
| NEW MEXICO           | 27.01         | 23.13         | 18.89         | 16.97         | 86.01       |

ARCOS 3 - REPORT 03 by GRAMS  
QUARTERLY DRUG DISTRIBUTION BY STATE PER 100K POPULATION

|                                   |              |              |              |              |               |
|-----------------------------------|--------------|--------------|--------------|--------------|---------------|
| NEW YORK                          | 58.80        | 54.91        | 51.34        | 51.13        | 216.18        |
| NORTH CAROLINA                    | 115.82       | 104.42       | 98.48        | 99.67        | 418.39        |
| NORTH DAKOTA                      | 12.18        | 12.02        | 10.60        | 9.96         | 44.76         |
| OHIO                              | 45.11        | 41.37        | 36.35        | 33.07        | 155.91        |
| OKLAHOMA                          | 75.19        | 65.45        | 48.72        | 34.72        | 224.08        |
| OREGON                            | 27.19        | 24.77        | 22.72        | 21.83        | 96.51         |
| PENNSYLVANIA                      | 113.68       | 100.57       | 90.27        | 86.03        | 390.55        |
| RHODE ISLAND                      | 21.95        | 15.93        | 15.13        | 11.71        | 64.73         |
| SOUTH CAROLINA                    | 73.01        | 67.73        | 65.24        | 62.86        | 268.84        |
| SOUTH DAKOTA                      | 41.13        | 35.39        | 29.32        | 35.91        | 141.75        |
| TENNESSEE                         | 223.25       | 201.78       | 183.31       | 177.41       | 785.75        |
| TEXAS                             | 22.02        | 18.95        | 16.71        | 14.85        | 72.53         |
| UTAH                              | 107.95       | 96.86        | 90.54        | 91.07        | 386.42        |
| VERMONT                           | 27.07        | 20.40        | 19.22        | 22.35        | 89.05         |
| VIRGINIA                          | 76.85        | 71.07        | 65.57        | 62.84        | 276.33        |
| WASHINGTON                        | 24.35        | 20.64        | 20.01        | 20.13        | 85.13         |
| WEST VIRGINIA                     | 79.88        | 74.29        | 61.60        | 62.80        | 278.57        |
| WISCONSIN                         | 18.13        | 14.57        | 13.59        | 12.45        | 58.74         |
| WYOMING                           | 34.56        | 22.21        | 20.52        | 19.98        | 97.28         |
| <b>9652 - OXYMORPHONE - Total</b> | <b>51.98</b> | <b>46.52</b> | <b>42.52</b> | <b>40.51</b> | <b>181.53</b> |

**DRUG: 9780 - TAPENTADOL**

| STATE NAME           | Q1 CALC GRAMS | Q2 CALC GRAMS | Q3 CALC GRAMS | Q4 CALC GRAMS | TOTAL GRAMS |
|----------------------|---------------|---------------|---------------|---------------|-------------|
| ALABAMA              | 906.86        | 907.41        | 846.02        | 777.22        | 3,437.51    |
| ALASKA               | 296.24        | 302.37        | 297.51        | 231.76        | 1,127.87    |
| ARIZONA              | 495.20        | 484.21        | 446.87        | 408.26        | 1,834.55    |
| ARKANSAS             | 534.36        | 492.92        | 449.36        | 401.23        | 1,877.86    |
| CALIFORNIA           | 230.01        | 221.49        | 211.48        | 205.98        | 868.95      |
| COLORADO             | 531.83        | 499.97        | 488.76        | 492.37        | 2,012.94    |
| CONNECTICUT          | 230.58        | 248.86        | 233.02        | 242.68        | 955.14      |
| DELAWARE             | 616.03        | 627.55        | 625.10        | 570.75        | 2,439.43    |
| DISTRICT OF COLUMBIA | 146.91        | 146.25        | 137.44        | 128.80        | 559.39      |
| FLORIDA              | 415.81        | 411.84        | 363.18        | 358.37        | 1,549.20    |
| GEORGIA              | 537.87        | 541.70        | 520.05        | 516.88        | 2,116.50    |
| HAWAII               | 183.86        | 149.31        | 132.07        | 128.91        | 594.13      |
| IDAHO                | 349.58        | 372.52        | 357.08        | 313.19        | 1,392.37    |
| ILLINOIS             | 229.77        | 227.37        | 214.58        | 216.60        | 888.32      |
| INDIANA              | 483.63        | 478.52        | 446.83        | 446.68        | 1,855.66    |
| IOWA                 | 328.28        | 300.88        | 294.27        | 294.60        | 1,218.03    |
| KANSAS               | 254.44        | 226.28        | 223.53        | 205.97        | 910.21      |
| KENTUCKY             | 294.29        | 282.28        | 263.06        | 261.58        | 1,101.21    |

|                                  |               |               |               |               |                 |
|----------------------------------|---------------|---------------|---------------|---------------|-----------------|
| LOUISIANA                        | 291.85        | 299.52        | 289.03        | 289.64        | 1,170.05        |
| MAINE                            | 77.95         | 93.91         | 97.04         | 84.62         | 353.52          |
| MARYLAND                         | 438.81        | 463.12        | 443.93        | 431.94        | 1,777.81        |
| MASSACHUSETTS                    | 242.27        | 260.09        | 252.99        | 253.52        | 1,008.88        |
| MICHIGAN                         | 183.88        | 172.97        | 165.21        | 161.19        | 683.26          |
| MINNESOTA                        | 74.71         | 68.71         | 69.55         | 68.90         | 281.88          |
| MISSISSIPPI                      | 332.90        | 301.62        | 301.12        | 277.12        | 1,212.75        |
| MISSOURI                         | 349.45        | 354.05        | 327.19        | 325.98        | 1,356.67        |
| MONTANA                          | 150.64        | 156.46        | 154.08        | 158.12        | 619.31          |
| NEBRASKA                         | 484.38        | 495.69        | 511.84        | 536.98        | 2,028.89        |
| NEVADA                           | 364.09        | 325.01        | 298.38        | 299.92        | 1,287.40        |
| NEW HAMPSHIRE                    | 438.83        | 457.13        | 485.28        | 463.97        | 1,845.20        |
| NEW JERSEY                       | 400.02        | 398.92        | 367.69        | 365.92        | 1,532.56        |
| NEW MEXICO                       | 135.88        | 122.16        | 121.29        | 116.24        | 495.56          |
| NEW YORK                         | 404.81        | 408.83        | 386.50        | 387.27        | 1,587.41        |
| NORTH CAROLINA                   | 850.16        | 878.47        | 858.47        | 892.90        | 3,479.99        |
| NORTH DAKOTA                     | 261.45        | 279.96        | 270.97        | 261.97        | 1,074.35        |
| OHIO                             | 421.77        | 412.66        | 385.21        | 372.92        | 1,592.57        |
| OKLAHOMA                         | 524.38        | 469.64        | 396.96        | 286.96        | 1,677.96        |
| OREGON                           | 175.59        | 169.89        | 160.66        | 141.06        | 647.19          |
| PENNSYLVANIA                     | 416.24        | 415.61        | 390.01        | 388.86        | 1,610.73        |
| PUERTO RICO                      | 13.07         | 15.42         | 11.86         | 12.15         | 52.50           |
| RHODE ISLAND                     | 164.17        | 205.55        | 172.48        | 176.85        | 719.05          |
| SOUTH CAROLINA                   | 771.49        | 798.34        | 756.71        | 726.87        | 3,053.40        |
| SOUTH DAKOTA                     | 506.95        | 465.56        | 426.44        | 427.18        | 1,826.13        |
| TENNESSEE                        | 416.93        | 434.07        | 395.89        | 383.57        | 1,630.46        |
| TEXAS                            | 322.55        | 304.91        | 292.34        | 280.32        | 1,200.13        |
| UTAH                             | 400.51        | 379.76        | 368.74        | 378.85        | 1,527.85        |
| VERMONT                          | 146.39        | 154.54        | 175.79        | 144.71        | 621.42          |
| VIRGIN ISLANDS                   | 0.00          | 0.00          | 4.55          | 0.00          | 4.55            |
| VIRGINIA                         | 421.02        | 409.56        | 375.50        | 370.18        | 1,576.26        |
| WASHINGTON                       | 214.54        | 215.37        | 206.29        | 210.08        | 846.28          |
| WEST VIRGINIA                    | 253.54        | 238.51        | 204.18        | 187.40        | 883.62          |
| WISCONSIN                        | 209.36        | 197.24        | 189.47        | 184.05        | 780.13          |
| WYOMING                          | 315.90        | 267.91        | 288.13        | 262.94        | 1,134.88        |
| <b>9780 - TAPENTADOL - Total</b> | <b>363.94</b> | <b>359.68</b> | <b>339.27</b> | <b>331.92</b> | <b>1,394.81</b> |

**DRUG: 9801 - FENTANYL BASE**

| STATE NAME | Q1 CALC GRAMS | Q2 CALC GRAMS | Q3 CALC GRAMS | Q4 CALC GRAMS | TOTAL GRAMS |
|------------|---------------|---------------|---------------|---------------|-------------|
| ALABAMA    | 27.17         | 24.64         | 22.85         | 21.01         | 95.68       |
| ALASKA     | 31.62         | 26.68         | 24.88         | 20.61         | 103.79      |

ARCOS 3 - REPORT 03 by GRAMS  
QUARTERLY DRUG DISTRIBUTION BY STATE PER 100K POPULATION

|                      |       |       |       |       |        |
|----------------------|-------|-------|-------|-------|--------|
| AMERICAN SAMOA       | 0.01  | 0.08  | 0.40  | 0.08  | 0.56   |
| ARIZONA              | 23.37 | 20.10 | 18.55 | 16.61 | 78.62  |
| ARKANSAS             | 26.86 | 23.00 | 21.04 | 19.68 | 90.58  |
| CALIFORNIA           | 16.36 | 15.06 | 13.53 | 12.94 | 57.89  |
| COLORADO             | 22.17 | 19.58 | 18.62 | 16.90 | 77.27  |
| CONNECTICUT          | 24.29 | 19.85 | 19.36 | 18.49 | 81.98  |
| DELAWARE             | 35.01 | 29.00 | 25.69 | 22.56 | 112.26 |
| DISTRICT OF COLUMBIA | 13.07 | 12.26 | 11.36 | 11.06 | 47.75  |
| FLORIDA              | 29.34 | 26.33 | 22.05 | 21.26 | 98.98  |
| GEORGIA              | 25.47 | 23.12 | 21.60 | 20.55 | 90.73  |
| GUAM                 | 5.02  | 4.04  | 5.16  | 4.14  | 18.37  |
| HAWAII               | 12.50 | 11.71 | 10.86 | 10.54 | 45.60  |
| IDAHO                | 35.77 | 31.70 | 30.35 | 28.70 | 126.52 |
| ILLINOIS             | 21.45 | 18.60 | 17.43 | 16.68 | 74.16  |
| INDIANA              | 25.65 | 22.80 | 21.43 | 20.26 | 90.13  |
| IOWA                 | 26.12 | 24.18 | 23.34 | 22.35 | 95.98  |
| KANSAS               | 33.65 | 30.62 | 28.67 | 28.23 | 121.16 |
| KENTUCKY             | 23.15 | 21.22 | 19.77 | 17.85 | 81.99  |
| LOUISIANA            | 22.38 | 20.20 | 18.87 | 18.04 | 79.49  |
| MAINE                | 22.86 | 20.60 | 20.06 | 19.43 | 82.94  |
| MARYLAND             | 20.39 | 18.15 | 16.54 | 15.43 | 70.51  |
| MASSACHUSETTS        | 17.94 | 16.86 | 15.33 | 15.17 | 65.29  |
| MICHIGAN             | 27.32 | 24.43 | 22.50 | 20.92 | 95.17  |
| MINNESOTA            | 17.40 | 14.86 | 14.78 | 13.73 | 60.77  |
| MISSISSIPPI          | 35.74 | 31.71 | 34.70 | 28.60 | 130.75 |
| MISSOURI             | 31.89 | 28.70 | 26.92 | 25.62 | 113.14 |
| MONTANA              | 29.50 | 27.68 | 25.60 | 24.41 | 107.20 |
| NEBRASKA             | 26.30 | 24.76 | 23.06 | 22.68 | 96.80  |
| NEVADA               | 17.84 | 15.79 | 14.50 | 13.35 | 61.49  |
| NEW HAMPSHIRE        | 23.31 | 22.19 | 19.90 | 18.43 | 83.83  |
| NEW JERSEY           | 26.54 | 20.27 | 18.85 | 18.51 | 84.18  |
| NEW MEXICO           | 19.23 | 16.18 | 15.35 | 14.81 | 65.58  |
| NEW YORK             | 19.44 | 17.82 | 16.16 | 15.74 | 69.16  |
| NORTH CAROLINA       | 25.60 | 22.94 | 21.75 | 20.97 | 91.26  |
| NORTH DAKOTA         | 29.87 | 28.73 | 26.78 | 24.60 | 109.98 |
| OHIO                 | 17.95 | 16.41 | 14.34 | 13.56 | 62.26  |
| OKLAHOMA             | 37.93 | 32.65 | 29.14 | 24.22 | 123.93 |
| OREGON               | 21.11 | 19.74 | 17.99 | 16.91 | 75.75  |
| PENNSYLVANIA         | 33.97 | 30.56 | 29.10 | 26.48 | 120.10 |
| PUERTO RICO          | 2.09  | 2.18  | 4.34  | 4.51  | 13.12  |

|                                     |              |              |              |              |              |
|-------------------------------------|--------------|--------------|--------------|--------------|--------------|
| RHODE ISLAND                        | 15.46        | 13.24        | 13.28        | 12.64        | 54.62        |
| SOUTH CAROLINA                      | 25.33        | 21.74        | 21.15        | 19.91        | 88.13        |
| SOUTH DAKOTA                        | 31.73        | 28.66        | 26.55        | 24.58        | 111.52       |
| TENNESSEE                           | 27.86        | 23.78        | 23.18        | 19.35        | 94.17        |
| TEXAS                               | 20.43        | 18.54        | 16.83        | 15.74        | 71.54        |
| UTAH                                | 27.31        | 24.44        | 23.10        | 22.43        | 97.29        |
| VERMONT                             | 26.75        | 24.78        | 22.32        | 21.64        | 95.50        |
| VIRGIN ISLANDS                      | 3.58         | 4.17         | 4.92         | 3.66         | 16.33        |
| VIRGINIA                            | 18.65        | 16.99        | 15.70        | 15.00        | 66.35        |
| WASHINGTON                          | 19.73        | 18.77        | 17.38        | 16.38        | 72.25        |
| WEST VIRGINIA                       | 25.93        | 23.93        | 21.32        | 21.14        | 92.32        |
| WISCONSIN                           | 23.14        | 20.54        | 18.93        | 17.53        | 80.14        |
| WYOMING                             | 25.03        | 21.45        | 20.89        | 19.69        | 87.06        |
| <b>9801 - FENTANYL BASE - Total</b> | <b>23.02</b> | <b>20.58</b> | <b>19.01</b> | <b>17.86</b> | <b>80.48</b> |

Apr 22, 2020

12:18:04 PM

**DRUG: 1100 - AMPHETAMINE**

| RANK | STATE NAME           | STATE POPULATION | TOTAL GRAMS  | TOTAL GRAMS/100K POPULATION |
|------|----------------------|------------------|--------------|-----------------------------|
| 1    | RHODE ISLAND         | 1,052,567        | 154,515.93   | 14,679.91                   |
| 2    | LOUISIANA            | 4,533,372        | 661,966.01   | 14,602.07                   |
| 3    | UTAH                 | 2,763,885        | 358,689.03   | 12,977.71                   |
| 4    | NEW HAMPSHIRE        | 1,316,470        | 161,453.90   | 12,264.15                   |
| 5    | SOUTH CAROLINA       | 4,625,364        | 557,757.34   | 12,058.67                   |
| 6    | ALABAMA              | 4,779,736        | 544,603.01   | 11,394.00                   |
| 7    | MASSACHUSETTS        | 6,547,629        | 732,127.12   | 11,181.56                   |
| 8    | MICHIGAN             | 9,883,640        | 978,827.49   | 9,903.51                    |
| 9    | MISSOURI             | 5,988,927        | 570,252.80   | 9,521.79                    |
| 10   | DELAWARE             | 897,934          | 85,067.25    | 9,473.66                    |
| 11   | VIRGINIA             | 8,001,024        | 733,900.96   | 9,172.59                    |
| 12   | NORTH CAROLINA       | 9,535,483        | 854,311.09   | 8,959.28                    |
| 13   | KANSAS               | 2,853,118        | 254,551.10   | 8,921.86                    |
| 14   | WISCONSIN            | 5,686,986        | 504,646.38   | 8,873.71                    |
| 15   | TENNESSEE            | 6,346,105        | 539,908.42   | 8,507.71                    |
| 16   | MINNESOTA            | 5,303,925        | 446,726.01   | 8,422.56                    |
| 17   | INDIANA              | 6,483,802        | 544,776.67   | 8,402.12                    |
| 18   | MISSISSIPPI          | 2,967,297        | 247,347.27   | 8,335.78                    |
| 19   | DISTRICT OF COLUMBIA | 601,723          | 49,528.65    | 8,231.14                    |
| 20   | GEORGIA              | 9,687,653        | 786,080.52   | 8,114.25                    |
| 21   | SOUTH DAKOTA         | 814,180          | 61,171.55    | 7,513.27                    |
| 22   | MAINE                | 1,328,361        | 96,407.31    | 7,257.61                    |
| 23   | OHIO                 | 11,536,504       | 831,699.97   | 7,209.29                    |
| 24   | IDAHO                | 1,567,582        | 112,820.52   | 7,197.10                    |
| 25   | ARKANSAS             | 2,915,918        | 209,272.63   | 7,176.90                    |
| 26   | TEXAS                | 25,145,561       | 1,781,188.02 | 7,083.51                    |
| 27   | IOWA                 | 3,046,355        | 210,803.33   | 6,919.85                    |
| 28   | WASHINGTON           | 6,724,540        | 462,544.20   | 6,878.45                    |
| 29   | COLORADO             | 5,029,196        | 344,951.40   | 6,858.98                    |
| 30   | FLORIDA              | 18,801,310       | 1,286,902.21 | 6,844.75                    |
| 31   | PENNSYLVANIA         | 12,702,379       | 858,765.46   | 6,760.67                    |
| 32   | MARYLAND             | 5,773,552        | 385,491.88   | 6,676.86                    |
| 33   | KENTUCKY             | 4,339,367        | 286,507.85   | 6,602.53                    |
| 34   | OREGON               | 3,831,074        | 249,921.37   | 6,523.53                    |
| 35   | VERMONT              | 625,741          | 40,537.69    | 6,478.35                    |
| 36   | CONNECTICUT          | 3,574,097        | 227,217.37   | 6,357.34                    |
| 37   | ILLINOIS             | 12,830,632       | 800,126.39   | 6,236.06                    |
| 38   | NEBRASKA             | 1,826,341        | 110,018.17   | 6,023.97                    |
| 39   | MONTANA              | 989,415          | 59,087.84    | 5,972.00                    |
| 40   | ARIZONA              | 6,392,017        | 376,375.70   | 5,888.21                    |
| 41   | OKLAHOMA             | 3,751,351        | 219,080.50   | 5,840.04                    |
| 42   | NORTH DAKOTA         | 672,591          | 37,507.06    | 5,576.50                    |



|                                   |                |                    |                      |                 |
|-----------------------------------|----------------|--------------------|----------------------|-----------------|
| 43                                | NEW YORK       | 19,378,102         | 999,146.60           | 5,156.06        |
| 44                                | WEST VIRGINIA  | 1,852,994          | 94,428.63            | 5,096.00        |
| 45                                | NEW JERSEY     | 8,791,894          | 438,239.25           | 4,984.58        |
| 46                                | WYOMING        | 563,626            | 27,622.71            | 4,900.89        |
| 47                                | ALASKA         | 710,231            | 33,900.69            | 4,773.19        |
| 48                                | NEVADA         | 2,700,551          | 108,053.81           | 4,001.18        |
| 49                                | CALIFORNIA     | 37,253,956         | 1,228,202.73         | 3,296.84        |
| 50                                | HAWAII         | 1,360,301          | 41,233.36            | 3,031.19        |
| 51                                | NEW MEXICO     | 2,059,179          | 61,196.72            | 2,971.90        |
| 52                                | VIRGIN ISLANDS | 109,825            | 1,325.10             | 1,206.55        |
| 53                                | PUERTO RICO    | 3,725,789          | 37,855.60            | 1,016.04        |
| 54                                | GUAM           | 178,430            | 1,759.37             | 986.03          |
| 55                                | AMERICAN SAMOA | 65,628             | 2.50                 | 3.81            |
| <b>1100 - AMPHETAMINE - Total</b> |                | <b>312,825,210</b> | <b>21,888,402.46</b> | <b>6,997.01</b> |

**DRUG: 1105 - METHAMPHETAMINE**

| RANK | STATE NAME           | STATE POPULATION | TOTAL GRAMS | TOTAL GRAMS/100K POPULATION |
|------|----------------------|------------------|-------------|-----------------------------|
| 1    | MINNESOTA            | 5,303,925        | 300.95      | 5.67                        |
| 2    | WASHINGTON           | 6,724,540        | 353.59      | 5.26                        |
| 3    | DISTRICT OF COLUMBIA | 601,723          | 29.73       | 4.94                        |
| 4    | COLORADO             | 5,029,196        | 235.47      | 4.68                        |
| 5    | MAINE                | 1,328,361        | 53.04       | 3.99                        |
| 6    | SOUTH DAKOTA         | 814,180          | 31.34       | 3.85                        |
| 7    | PENNSYLVANIA         | 12,702,379       | 481.36      | 3.79                        |
| 8    | OREGON               | 3,831,074        | 142.23      | 3.71                        |
| 9    | IDAHO                | 1,567,582        | 55.44       | 3.54                        |
| 10   | UTAH                 | 2,763,885        | 94.43       | 3.42                        |
| 11   | WYOMING              | 563,626          | 18.48       | 3.28                        |
| 12   | NEVADA               | 2,700,551        | 81.98       | 3.04                        |
| 13   | CALIFORNIA           | 37,253,956       | 1,079.95    | 2.90                        |
| 14   | MISSOURI             | 5,988,927        | 172.36      | 2.88                        |
| 15   | NORTH DAKOTA         | 672,591          | 19.28       | 2.87                        |
| 16   | ALABAMA              | 4,779,736        | 135.81      | 2.84                        |
| 17   | ARIZONA              | 6,392,017        | 180.01      | 2.82                        |
| 18   | CONNECTICUT          | 3,574,097        | 96.03       | 2.69                        |
| 19   | MARYLAND             | 5,773,552        | 154.29      | 2.67                        |
| 20   | WISCONSIN            | 5,686,986        | 138.21      | 2.43                        |
| 21   | IOWA                 | 3,046,355        | 70.72       | 2.32                        |
| 22   | KANSAS               | 2,853,118        | 61.48       | 2.15                        |
| 23   | MASSACHUSETTS        | 6,547,629        | 139.43      | 2.13                        |
| 24   | NORTH CAROLINA       | 9,535,483        | 191.26      | 2.01                        |
| 25   | DELAWARE             | 897,934          | 17.68       | 1.97                        |

|                                       |                |                    |                 |             |
|---------------------------------------|----------------|--------------------|-----------------|-------------|
| 26                                    | NEW YORK       | 19,378,102         | 365.64          | 1.89        |
| 27                                    | TEXAS          | 25,145,561         | 424.31          | 1.69        |
| 28                                    | HAWAII         | 1,360,301          | 22.10           | 1.62        |
| 29                                    | ILLINOIS       | 12,830,632         | 207.74          | 1.62        |
| 30                                    | NEW JERSEY     | 8,791,894          | 139.43          | 1.59        |
| 31                                    | INDIANA        | 6,483,802          | 102.47          | 1.58        |
| 32                                    | VIRGINIA       | 8,001,024          | 126.17          | 1.58        |
| 33                                    | SOUTH CAROLINA | 4,625,364          | 72.73           | 1.57        |
| 34                                    | NEW HAMPSHIRE  | 1,316,470          | 19.69           | 1.50        |
| 35                                    | OKLAHOMA       | 3,751,351          | 54.65           | 1.46        |
| 36                                    | RHODE ISLAND   | 1,052,567          | 14.87           | 1.41        |
| 37                                    | OHIO           | 11,536,504         | 157.52          | 1.37        |
| 38                                    | VERMONT        | 625,741            | 8.44            | 1.35        |
| 39                                    | LOUISIANA      | 4,533,372          | 60.27           | 1.33        |
| 40                                    | NEW MEXICO     | 2,059,179          | 22.90           | 1.11        |
| 41                                    | NEBRASKA       | 1,826,341          | 20.09           | 1.10        |
| 42                                    | KENTUCKY       | 4,339,367          | 47.01           | 1.08        |
| 43                                    | ALASKA         | 710,231            | 7.63            | 1.07        |
| 44                                    | FLORIDA        | 18,801,310         | 196.48          | 1.05        |
| 45                                    | MISSISSIPPI    | 2,967,297          | 30.94           | 1.04        |
| 46                                    | MICHIGAN       | 9,883,640          | 101.26          | 1.02        |
| 47                                    | WEST VIRGINIA  | 1,852,994          | 18.48           | 1.00        |
| 48                                    | ARKANSAS       | 2,915,918          | 28.13           | 0.96        |
| 49                                    | TENNESSEE      | 6,346,105          | 59.07           | 0.93        |
| 50                                    | GEORGIA        | 9,687,653          | 88.80           | 0.92        |
| 51                                    | MONTANA        | 989,415            | 0.40            | 0.04        |
| <b>1105 - METHAMPHETAMINE - Total</b> |                | <b>312,825,210</b> | <b>6,731.76</b> | <b>2.15</b> |

**DRUG: 1205 - LISDEXAMFETAMINE**

| RANK | STATE NAME     | STATE POPULATION | TOTAL GRAMS | TOTAL GRAMS/100K POPULATION |
|------|----------------|------------------|-------------|-----------------------------|
| 1    | LOUISIANA      | 4,533,372        | 356,243.72  | 7,858.25                    |
| 2    | DELAWARE       | 897,934          | 55,749.65   | 6,208.66                    |
| 3    | ALABAMA        | 4,779,736        | 283,849.59  | 5,938.60                    |
| 4    | SOUTH CAROLINA | 4,625,364        | 243,292.14  | 5,259.96                    |
| 5    | INDIANA        | 6,483,802        | 333,963.17  | 5,150.73                    |
| 6    | WISCONSIN      | 5,686,986        | 291,709.84  | 5,129.43                    |
| 7    | MAINE          | 1,328,361        | 66,987.92   | 5,042.90                    |
| 8    | MISSISSIPPI    | 2,967,297        | 149,623.84  | 5,042.43                    |
| 9    | SOUTH DAKOTA   | 814,180          | 40,983.24   | 5,033.68                    |
| 10   | VERMONT        | 625,741          | 28,702.67   | 4,586.99                    |
| 11   | IOWA           | 3,046,355        | 136,846.10  | 4,492.13                    |
| 12   | KANSAS         | 2,853,118        | 127,852.60  | 4,481.15                    |

ARCOS 3 - REPORT 04 by GRAMS  
CUMULATIVE DISTRIBUTION BY STATE PER 100K POPULATION

|    |                      |            |              |          |
|----|----------------------|------------|--------------|----------|
| 13 | MISSOURI             | 5,988,927  | 268,283.32   | 4,479.66 |
| 14 | NORTH CAROLINA       | 9,535,483  | 423,079.59   | 4,436.90 |
| 15 | NEW HAMPSHIRE        | 1,316,470  | 56,538.18    | 4,294.68 |
| 16 | TENNESSEE            | 6,346,105  | 269,531.35   | 4,247.19 |
| 17 | TEXAS                | 25,145,561 | 1,064,948.09 | 4,235.13 |
| 18 | WEST VIRGINIA        | 1,852,994  | 75,151.27    | 4,055.67 |
| 19 | CONNECTICUT          | 3,574,097  | 144,803.07   | 4,051.46 |
| 20 | GEORGIA              | 9,687,653  | 391,925.61   | 4,045.62 |
| 21 | ARKANSAS             | 2,915,918  | 117,953.04   | 4,045.14 |
| 22 | OKLAHOMA             | 3,751,351  | 148,663.91   | 3,962.94 |
| 23 | MARYLAND             | 5,773,552  | 226,434.49   | 3,921.93 |
| 24 | NEBRASKA             | 1,826,341  | 69,450.56    | 3,802.72 |
| 25 | KENTUCKY             | 4,339,367  | 163,801.36   | 3,774.78 |
| 26 | DISTRICT OF COLUMBIA | 601,723    | 22,608.33    | 3,757.27 |
| 27 | NORTH DAKOTA         | 672,591    | 23,522.31    | 3,497.27 |
| 28 | OHIO                 | 11,536,504 | 400,270.01   | 3,469.60 |
| 29 | VIRGINIA             | 8,001,024  | 268,242.53   | 3,352.60 |
| 30 | UTAH                 | 2,763,885  | 90,277.12    | 3,266.31 |
| 31 | FLORIDA              | 18,801,310 | 541,099.66   | 2,877.99 |
| 32 | PENNSYLVANIA         | 12,702,379 | 355,671.98   | 2,800.04 |
| 33 | RHODE ISLAND         | 1,052,567  | 29,458.24    | 2,798.70 |
| 34 | ARIZONA              | 6,392,017  | 169,026.61   | 2,644.34 |
| 35 | MONTANA              | 989,415    | 24,639.20    | 2,490.28 |
| 36 | MICHIGAN             | 9,883,640  | 244,803.58   | 2,476.86 |
| 37 | IDAHO                | 1,567,582  | 38,589.33    | 2,461.71 |
| 38 | MINNESOTA            | 5,303,925  | 124,261.44   | 2,342.82 |
| 39 | COLORADO             | 5,029,196  | 116,503.91   | 2,316.55 |
| 40 | MASSACHUSETTS        | 6,547,629  | 150,455.15   | 2,297.86 |
| 41 | ILLINOIS             | 12,830,632 | 289,067.34   | 2,252.95 |
| 42 | NEW JERSEY           | 8,791,894  | 194,776.49   | 2,215.41 |
| 43 | WASHINGTON           | 6,724,540  | 142,599.20   | 2,120.58 |
| 44 | WYOMING              | 563,626    | 10,518.53    | 1,866.23 |
| 45 | NEW YORK             | 19,378,102 | 348,540.24   | 1,798.63 |
| 46 | OREGON               | 3,831,074  | 62,738.39    | 1,637.62 |
| 47 | ALASKA               | 710,231    | 10,628.37    | 1,496.47 |
| 48 | CALIFORNIA           | 37,253,956 | 452,255.56   | 1,213.98 |
| 49 | NEVADA               | 2,700,551  | 31,481.41    | 1,165.74 |
| 50 | NEW MEXICO           | 2,059,179  | 15,678.65    | 761.40   |
| 51 | HAWAII               | 1,360,301  | 6,115.14     | 449.54   |
| 52 | VIRGIN ISLANDS       | 109,825    | 277.49       | 252.66   |
| 53 | PUERTO RICO          | 3,725,789  | 8,477.84     | 227.54   |

|                                        |      |                    |                     |                 |
|----------------------------------------|------|--------------------|---------------------|-----------------|
| 54                                     | GUAM | 178,430            | 43.94               | 24.62           |
| <b>1205 - LISDEXAMFETAMINE - Total</b> |      | <b>312,825,210</b> | <b>9,708,996.30</b> | <b>3,103.65</b> |

**DRUG: 1724 - METHYLPHENIDATE (DL;D;L;ISOMERS)**

| RANK | STATE NAME           | STATE POPULATION | TOTAL GRAMS | TOTAL GRAMS/100K POPULATION |
|------|----------------------|------------------|-------------|-----------------------------|
| 1    | VERMONT              | 625,741          | 74,925.40   | 11,973.87                   |
| 2    | MAINE                | 1,328,361        | 138,505.73  | 10,426.81                   |
| 3    | IOWA                 | 3,046,355        | 316,973.49  | 10,405.01                   |
| 4    | NEW HAMPSHIRE        | 1,316,470        | 132,963.86  | 10,100.03                   |
| 5    | SOUTH DAKOTA         | 814,180          | 81,697.86   | 10,034.37                   |
| 6    | NORTH DAKOTA         | 672,591          | 60,259.60   | 8,959.32                    |
| 7    | MISSOURI             | 5,988,927        | 515,345.28  | 8,604.97                    |
| 8    | MASSACHUSETTS        | 6,547,629        | 561,630.85  | 8,577.62                    |
| 9    | DELAWARE             | 897,934          | 70,498.43   | 7,851.18                    |
| 10   | NORTH CAROLINA       | 9,535,483        | 721,018.56  | 7,561.43                    |
| 11   | MINNESOTA            | 5,303,925        | 398,703.63  | 7,517.14                    |
| 12   | SOUTH CAROLINA       | 4,625,364        | 340,046.25  | 7,351.77                    |
| 13   | MICHIGAN             | 9,883,640        | 712,050.08  | 7,204.33                    |
| 14   | WISCONSIN            | 5,686,986        | 409,009.53  | 7,192.03                    |
| 15   | LOUISIANA            | 4,533,372        | 325,839.09  | 7,187.57                    |
| 16   | INDIANA              | 6,483,802        | 457,897.73  | 7,062.18                    |
| 17   | IDAHO                | 1,567,582        | 110,467.80  | 7,047.02                    |
| 18   | OHIO                 | 11,536,504       | 812,379.83  | 7,041.82                    |
| 19   | RHODE ISLAND         | 1,052,567        | 72,537.70   | 6,891.50                    |
| 20   | PENNSYLVANIA         | 12,702,379       | 871,088.33  | 6,857.68                    |
| 21   | MONTANA              | 989,415          | 67,683.91   | 6,840.80                    |
| 22   | KANSAS               | 2,853,118        | 193,258.41  | 6,773.59                    |
| 23   | MARYLAND             | 5,773,552        | 388,584.27  | 6,730.42                    |
| 24   | KENTUCKY             | 4,339,367        | 290,894.33  | 6,703.61                    |
| 25   | NEBRASKA             | 1,826,341        | 121,629.05  | 6,659.71                    |
| 26   | WASHINGTON           | 6,724,540        | 447,627.62  | 6,656.63                    |
| 27   | UTAH                 | 2,763,885        | 183,703.86  | 6,646.58                    |
| 28   | WEST VIRGINIA        | 1,852,994        | 120,742.68  | 6,516.09                    |
| 29   | GEORGIA              | 9,687,653        | 630,837.46  | 6,511.77                    |
| 30   | VIRGINIA             | 8,001,024        | 520,555.76  | 6,506.11                    |
| 31   | OREGON               | 3,831,074        | 245,801.71  | 6,416.00                    |
| 32   | CONNECTICUT          | 3,574,097        | 218,120.11  | 6,102.80                    |
| 33   | ALABAMA              | 4,779,736        | 281,105.10  | 5,881.18                    |
| 34   | MISSISSIPPI          | 2,967,297        | 164,923.13  | 5,558.03                    |
| 35   | WYOMING              | 563,626          | 30,287.69   | 5,373.72                    |
| 36   | DISTRICT OF COLUMBIA | 601,723          | 31,641.33   | 5,258.45                    |
| 37   | ARKANSAS             | 2,915,918        | 152,220.89  | 5,220.34                    |

|                                                        |                |                    |                      |                 |
|--------------------------------------------------------|----------------|--------------------|----------------------|-----------------|
| 38                                                     | ARIZONA        | 6,392,017          | 331,019.40           | 5,178.64        |
| 39                                                     | ILLINOIS       | 12,830,632         | 663,079.86           | 5,167.94        |
| 40                                                     | TEXAS          | 25,145,561         | 1,283,631.84         | 5,104.80        |
| 41                                                     | TENNESSEE      | 6,346,105          | 321,164.51           | 5,060.81        |
| 42                                                     | OKLAHOMA       | 3,751,351          | 186,538.79           | 4,972.58        |
| 43                                                     | COLORADO       | 5,029,196          | 245,024.63           | 4,872.04        |
| 44                                                     | NEW YORK       | 19,378,102         | 897,668.27           | 4,632.38        |
| 45                                                     | ALASKA         | 710,231            | 31,994.14            | 4,504.75        |
| 46                                                     | FLORIDA        | 18,801,310         | 784,881.68           | 4,174.61        |
| 47                                                     | NEW JERSEY     | 8,791,894          | 355,503.83           | 4,043.54        |
| 48                                                     | NEW MEXICO     | 2,059,179          | 72,441.79            | 3,517.99        |
| 49                                                     | HAWAII         | 1,360,301          | 43,748.73            | 3,216.11        |
| 50                                                     | CALIFORNIA     | 37,253,956         | 1,042,295.57         | 2,797.81        |
| 51                                                     | NEVADA         | 2,700,551          | 58,216.16            | 2,155.71        |
| 52                                                     | PUERTO RICO    | 3,725,789          | 57,389.98            | 1,540.34        |
| 53                                                     | GUAM           | 178,430            | 1,984.74             | 1,112.34        |
| 54                                                     | VIRGIN ISLANDS | 109,825            | 586.16               | 533.72          |
| 55                                                     | AMERICAN SAMOA | 65,628             | 44.10                | 67.20           |
| <b>1724 - METHYLPHENIDATE (DL;D;L;ISOMERS) - Total</b> |                | <b>312,825,210</b> | <b>17,650,670.52</b> | <b>5,642.34</b> |

**DRUG: 9050 - CODEINE**

| RANK | STATE NAME           | STATE POPULATION | TOTAL GRAMS  | TOTAL GRAMS/100K POPULATION |
|------|----------------------|------------------|--------------|-----------------------------|
| 1    | TEXAS                | 25,145,561       | 3,661,119.62 | 14,559.71                   |
| 2    | OKLAHOMA             | 3,751,351        | 348,095.81   | 9,279.21                    |
| 3    | ARKANSAS             | 2,915,918        | 241,747.80   | 8,290.62                    |
| 4    | MICHIGAN             | 9,883,640        | 809,994.72   | 8,195.31                    |
| 5    | WEST VIRGINIA        | 1,852,994        | 143,305.26   | 7,733.71                    |
| 6    | DISTRICT OF COLUMBIA | 601,723          | 41,461.92    | 6,890.53                    |
| 7    | SOUTH CAROLINA       | 4,625,364        | 280,974.88   | 6,074.65                    |
| 8    | ILLINOIS             | 12,830,632       | 569,355.47   | 4,437.47                    |
| 9    | CALIFORNIA           | 37,253,956       | 1,605,157.49 | 4,308.69                    |
| 10   | TENNESSEE            | 6,346,105        | 268,960.19   | 4,238.19                    |
| 11   | ALABAMA              | 4,779,736        | 201,605.04   | 4,217.91                    |
| 12   | MISSOURI             | 5,988,927        | 243,080.15   | 4,058.83                    |
| 13   | KENTUCKY             | 4,339,367        | 168,180.16   | 3,875.68                    |
| 14   | GEORGIA              | 9,687,653        | 365,928.70   | 3,777.27                    |
| 15   | ARIZONA              | 6,392,017        | 237,282.47   | 3,712.17                    |
| 16   | MONTANA              | 989,415          | 35,536.89    | 3,591.71                    |
| 17   | DELAWARE             | 897,934          | 31,949.10    | 3,558.07                    |
| 18   | PENNSYLVANIA         | 12,702,379       | 444,669.53   | 3,500.68                    |
| 19   | HAWAII               | 1,360,301        | 46,425.06    | 3,412.85                    |
| 20   | MARYLAND             | 5,773,552        | 196,096.69   | 3,396.47                    |

|                               |                |                    |                      |                 |
|-------------------------------|----------------|--------------------|----------------------|-----------------|
| 21                            | LOUISIANA      | 4,533,372          | 152,869.10           | 3,372.08        |
| 22                            | KANSAS         | 2,853,118          | 95,710.26            | 3,354.58        |
| 23                            | ALASKA         | 710,231            | 23,569.75            | 3,318.60        |
| 24                            | NEW MEXICO     | 2,059,179          | 66,006.90            | 3,205.50        |
| 25                            | WASHINGTON     | 6,724,540          | 214,824.84           | 3,194.64        |
| 26                            | FLORIDA        | 18,801,310         | 600,497.44           | 3,193.91        |
| 27                            | OREGON         | 3,831,074          | 121,785.82           | 3,178.90        |
| 28                            | MISSISSIPPI    | 2,967,297          | 92,647.22            | 3,122.28        |
| 29                            | IDAHO          | 1,567,582          | 48,693.85            | 3,106.30        |
| 30                            | NEW JERSEY     | 8,791,894          | 270,126.81           | 3,072.45        |
| 31                            | WISCONSIN      | 5,686,986          | 168,161.69           | 2,956.96        |
| 32                            | NEVADA         | 2,700,551          | 78,795.10            | 2,917.74        |
| 33                            | SOUTH DAKOTA   | 814,180            | 22,849.83            | 2,806.48        |
| 34                            | NORTH DAKOTA   | 672,591            | 18,775.44            | 2,791.51        |
| 35                            | INDIANA        | 6,483,802          | 174,704.43           | 2,694.48        |
| 36                            | MAINE          | 1,328,361          | 35,432.24            | 2,667.37        |
| 37                            | OHIO           | 11,536,504         | 307,555.84           | 2,665.94        |
| 38                            | NEW YORK       | 19,378,102         | 497,596.48           | 2,567.83        |
| 39                            | WYOMING        | 563,626            | 14,330.25            | 2,542.51        |
| 40                            | VIRGIN ISLANDS | 109,825            | 2,778.39             | 2,529.83        |
| 41                            | MASSACHUSETTS  | 6,547,629          | 160,968.12           | 2,458.42        |
| 42                            | MINNESOTA      | 5,303,925          | 129,219.55           | 2,436.30        |
| 43                            | IOWA           | 3,046,355          | 70,841.41            | 2,325.45        |
| 44                            | VIRGINIA       | 8,001,024          | 184,561.82           | 2,306.73        |
| 45                            | NEBRASKA       | 1,826,341          | 41,200.75            | 2,255.92        |
| 46                            | CONNECTICUT    | 3,574,097          | 78,480.23            | 2,195.81        |
| 47                            | RHODE ISLAND   | 1,052,567          | 23,013.23            | 2,186.39        |
| 48                            | UTAH           | 2,763,885          | 58,837.81            | 2,128.81        |
| 49                            | GUAM           | 178,430            | 3,598.89             | 2,016.98        |
| 50                            | NEW HAMPSHIRE  | 1,316,470          | 26,377.09            | 2,003.62        |
| 51                            | VERMONT        | 625,741            | 10,886.96            | 1,739.85        |
| 52                            | NORTH CAROLINA | 9,535,483          | 163,261.25           | 1,712.14        |
| 53                            | COLORADO       | 5,029,196          | 84,732.08            | 1,684.80        |
| 54                            | AMERICAN SAMOA | 65,628             | 1,060.85             | 1,616.46        |
| 55                            | PUERTO RICO    | 3,725,789          | 46,899.43            | 1,258.78        |
| <b>9050 - CODEINE - Total</b> |                | <b>312,825,210</b> | <b>14,032,578.12</b> | <b>4,485.76</b> |

**DRUG: 9064 - BUPRENORPHINE**

| RANK | STATE NAME    | STATE POPULATION | TOTAL GRAMS | TOTAL GRAMS/100K POPULATION |
|------|---------------|------------------|-------------|-----------------------------|
| 1    | VERMONT       | 625,741          | 27,164.61   | 4,341.19                    |
| 2    | KENTUCKY      | 4,339,367        | 155,629.85  | 3,586.46                    |
| 3    | WEST VIRGINIA | 1,852,994        | 64,544.98   | 3,483.28                    |

|    |                      |            |            |          |
|----|----------------------|------------|------------|----------|
| 4  | MAINE                | 1,328,361  | 44,878.69  | 3,378.50 |
| 5  | RHODE ISLAND         | 1,052,567  | 32,691.74  | 3,105.91 |
| 6  | MASSACHUSETTS        | 6,547,629  | 175,411.51 | 2,679.01 |
| 7  | NEW HAMPSHIRE        | 1,316,470  | 34,845.51  | 2,646.89 |
| 8  | TENNESSEE            | 6,346,105  | 153,767.41 | 2,423.02 |
| 9  | ALABAMA              | 4,779,736  | 115,648.15 | 2,419.55 |
| 10 | PENNSYLVANIA         | 12,702,379 | 289,950.16 | 2,282.64 |
| 11 | MARYLAND             | 5,773,552  | 115,983.50 | 2,008.88 |
| 12 | OHIO                 | 11,536,504 | 225,373.82 | 1,953.57 |
| 13 | DISTRICT OF COLUMBIA | 601,723    | 11,589.32  | 1,926.02 |
| 14 | LOUISIANA            | 4,533,372  | 84,626.49  | 1,866.74 |
| 15 | CONNECTICUT          | 3,574,097  | 65,088.17  | 1,821.11 |
| 16 | DELAWARE             | 897,934    | 15,905.60  | 1,771.36 |
| 17 | NORTH CAROLINA       | 9,535,483  | 160,024.88 | 1,678.20 |
| 18 | NEW MEXICO           | 2,059,179  | 34,195.54  | 1,660.64 |
| 19 | INDIANA              | 6,483,802  | 97,607.04  | 1,505.40 |
| 20 | UTAH                 | 2,763,885  | 41,575.13  | 1,504.23 |
| 21 | ALASKA               | 710,231    | 10,564.38  | 1,487.46 |
| 22 | OKLAHOMA             | 3,751,351  | 55,470.25  | 1,478.67 |
| 23 | MISSISSIPPI          | 2,967,297  | 42,860.68  | 1,444.44 |
| 24 | WASHINGTON           | 6,724,540  | 95,924.45  | 1,426.48 |
| 25 | OREGON               | 3,831,074  | 49,174.65  | 1,283.57 |
| 26 | NEW JERSEY           | 8,791,894  | 111,067.66 | 1,263.30 |
| 27 | NEW YORK             | 19,378,102 | 244,277.64 | 1,260.59 |
| 28 | MICHIGAN             | 9,883,640  | 122,156.32 | 1,235.94 |
| 29 | MONTANA              | 989,415    | 12,159.72  | 1,228.98 |
| 30 | FLORIDA              | 18,801,310 | 208,118.09 | 1,106.93 |
| 31 | SOUTH CAROLINA       | 4,625,364  | 51,017.95  | 1,103.00 |
| 32 | VIRGINIA             | 8,001,024  | 86,586.44  | 1,082.19 |
| 33 | IDAHO                | 1,567,582  | 16,872.80  | 1,076.36 |
| 34 | ARKANSAS             | 2,915,918  | 29,074.25  | 997.09   |
| 35 | WYOMING              | 563,626    | 5,357.00   | 950.45   |
| 36 | MISSOURI             | 5,988,927  | 53,639.78  | 895.65   |
| 37 | WISCONSIN            | 5,686,986  | 48,115.17  | 846.06   |
| 38 | GEORGIA              | 9,687,653  | 69,149.91  | 713.79   |
| 39 | ARIZONA              | 6,392,017  | 45,046.72  | 704.73   |
| 40 | COLORADO             | 5,029,196  | 35,203.25  | 699.98   |
| 41 | NORTH DAKOTA         | 672,591    | 4,653.28   | 691.84   |
| 42 | MINNESOTA            | 5,303,925  | 36,212.90  | 682.76   |
| 43 | HAWAII               | 1,360,301  | 8,594.50   | 631.81   |
| 44 | NEVADA               | 2,700,551  | 15,290.93  | 566.22   |

|                                     |                |                    |                     |                 |
|-------------------------------------|----------------|--------------------|---------------------|-----------------|
| 45                                  | ILLINOIS       | 12,830,632         | 66,850.09           | 521.02          |
| 46                                  | CALIFORNIA     | 37,253,956         | 171,999.96          | 461.70          |
| 47                                  | TEXAS          | 25,145,561         | 114,352.32          | 454.76          |
| 48                                  | KANSAS         | 2,853,118          | 11,268.50           | 394.95          |
| 49                                  | NEBRASKA       | 1,826,341          | 5,963.88            | 326.55          |
| 50                                  | SOUTH DAKOTA   | 814,180            | 2,304.93            | 283.10          |
| 51                                  | IOWA           | 3,046,355          | 8,260.26            | 271.15          |
| 52                                  | PUERTO RICO    | 3,725,789          | 8,501.12            | 228.17          |
| 53                                  | VIRGIN ISLANDS | 109,825            | 49.12               | 44.73           |
| 54                                  | GUAM           | 178,430            | 2.31                | 1.29            |
| 55                                  | AMERICAN SAMOA | 65,628             | 0.04                | 0.06            |
| <b>9064 - BUPRENORPHINE - Total</b> |                | <b>312,825,210</b> | <b>3,792,643.31</b> | <b>1,212.38</b> |

**DRUG: 9143 - OXYCODONE**

| RANK | STATE NAME     | STATE POPULATION | TOTAL GRAMS  | TOTAL GRAMS/100K POPULATION |
|------|----------------|------------------|--------------|-----------------------------|
| 1    | DELAWARE       | 897,934          | 242,460.33   | 27,002.02                   |
| 2    | TENNESSEE      | 6,346,105        | 1,598,875.37 | 25,194.59                   |
| 3    | NEVADA         | 2,700,551        | 594,943.99   | 22,030.47                   |
| 4    | ARIZONA        | 6,392,017        | 1,382,357.85 | 21,626.32                   |
| 5    | UTAH           | 2,763,885        | 586,704.81   | 21,227.54                   |
| 6    | NORTH CAROLINA | 9,535,483        | 1,926,492.48 | 20,203.41                   |
| 7    | FLORIDA        | 18,801,310       | 3,694,501.21 | 19,650.23                   |
| 8    | OKLAHOMA       | 3,751,351        | 734,588.62   | 19,581.98                   |
| 9    | PENNSYLVANIA   | 12,702,379       | 2,453,858.91 | 19,318.10                   |
| 10   | MARYLAND       | 5,773,552        | 1,091,362.08 | 18,902.78                   |
| 11   | NEW JERSEY     | 8,791,894        | 1,623,835.91 | 18,469.69                   |
| 12   | KENTUCKY       | 4,339,367        | 739,198.98   | 17,034.72                   |
| 13   | ALASKA         | 710,231          | 120,091.96   | 16,908.86                   |
| 14   | SOUTH CAROLINA | 4,625,364        | 774,314.35   | 16,740.61                   |
| 15   | ALABAMA        | 4,779,736        | 794,969.65   | 16,632.08                   |
| 16   | GEORGIA        | 9,687,653        | 1,579,564.08 | 16,304.92                   |
| 17   | WYOMING        | 563,626          | 90,905.46    | 16,128.68                   |
| 18   | MISSOURI       | 5,988,927        | 954,906.78   | 15,944.54                   |
| 19   | CONNECTICUT    | 3,574,097        | 568,944.68   | 15,918.56                   |
| 20   | ARKANSAS       | 2,915,918        | 458,923.65   | 15,738.56                   |
| 21   | NEW HAMPSHIRE  | 1,316,470        | 206,713.38   | 15,702.10                   |
| 22   | OREGON         | 3,831,074        | 585,778.76   | 15,290.20                   |
| 23   | NEW MEXICO     | 2,059,179        | 311,123.09   | 15,109.08                   |
| 24   | COLORADO       | 5,029,196        | 759,717.61   | 15,106.14                   |
| 25   | KANSAS         | 2,853,118        | 421,416.52   | 14,770.39                   |
| 26   | WASHINGTON     | 6,724,540        | 989,742.63   | 14,718.37                   |
| 27   | LOUISIANA      | 4,533,372        | 656,705.08   | 14,486.02                   |



|                                 |                      |                    |                      |                  |
|---------------------------------|----------------------|--------------------|----------------------|------------------|
| 28                              | WEST VIRGINIA        | 1,852,994          | 264,334.46           | 14,265.26        |
| 29                              | OHIO                 | 11,536,504         | 1,569,513.43         | 13,604.76        |
| 30                              | IDAHO                | 1,567,582          | 212,925.53           | 13,583.06        |
| 31                              | MAINE                | 1,328,361          | 180,328.38           | 13,575.25        |
| 32                              | NEW YORK             | 19,378,102         | 2,475,019.89         | 12,772.25        |
| 33                              | RHODE ISLAND         | 1,052,567          | 133,921.89           | 12,723.36        |
| 34                              | VERMONT              | 625,741            | 79,018.26            | 12,627.95        |
| 35                              | MONTANA              | 989,415            | 124,854.68           | 12,619.04        |
| 36                              | MASSACHUSETTS        | 6,547,629          | 824,642.85           | 12,594.53        |
| 37                              | VIRGINIA             | 8,001,024          | 1,005,192.47         | 12,563.30        |
| 38                              | INDIANA              | 6,483,802          | 796,671.10           | 12,287.10        |
| 39                              | MISSISSIPPI          | 2,967,297          | 358,175.10           | 12,070.75        |
| 40                              | WISCONSIN            | 5,686,986          | 658,712.06           | 11,582.80        |
| 41                              | HAWAII               | 1,360,301          | 147,943.28           | 10,875.78        |
| 42                              | MICHIGAN             | 9,883,640          | 945,331.20           | 9,564.61         |
| 43                              | MINNESOTA            | 5,303,925          | 481,528.29           | 9,078.72         |
| 44                              | DISTRICT OF COLUMBIA | 601,723            | 49,631.36            | 8,248.21         |
| 45                              | NEBRASKA             | 1,826,341          | 143,660.91           | 7,866.05         |
| 46                              | CALIFORNIA           | 37,253,956         | 2,884,241.08         | 7,742.11         |
| 47                              | NORTH DAKOTA         | 672,591            | 50,831.84            | 7,557.62         |
| 48                              | SOUTH DAKOTA         | 814,180            | 56,641.51            | 6,956.88         |
| 49                              | IOWA                 | 3,046,355          | 177,777.69           | 5,835.75         |
| 50                              | TEXAS                | 25,145,561         | 1,191,356.55         | 4,737.84         |
| 51                              | ILLINOIS             | 12,830,632         | 539,002.68           | 4,200.91         |
| 52                              | GUAM                 | 178,430            | 3,145.83             | 1,763.06         |
| 53                              | VIRGIN ISLANDS       | 109,825            | 1,752.57             | 1,595.78         |
| 54                              | PUERTO RICO          | 3,725,789          | 44,330.91            | 1,189.84         |
| 55                              | AMERICAN SAMOA       | 65,628             | 36.76                | 56.01            |
| <b>9143 - OXYCODONE - Total</b> |                      | <b>312,825,210</b> | <b>41,343,520.76</b> | <b>13,216.17</b> |

**DRUG: 9150 - HYDROMORPHONE**

| RANK | STATE NAME    | STATE POPULATION | TOTAL GRAMS | TOTAL GRAMS/100K POPULATION |
|------|---------------|------------------|-------------|-----------------------------|
| 1    | FLORIDA       | 18,801,310       | 155,520.83  | 827.18                      |
| 2    | DELAWARE      | 897,934          | 6,472.38    | 720.81                      |
| 3    | MISSISSIPPI   | 2,967,297        | 20,586.53   | 693.78                      |
| 4    | VERMONT       | 625,741          | 3,998.48    | 639.00                      |
| 5    | CONNECTICUT   | 3,574,097        | 20,355.47   | 569.53                      |
| 6    | MONTANA       | 989,415          | 5,613.14    | 567.32                      |
| 7    | WASHINGTON    | 6,724,540        | 35,286.47   | 524.74                      |
| 8    | NEW HAMPSHIRE | 1,316,470        | 6,594.75    | 500.94                      |
| 9    | COLORADO      | 5,029,196        | 23,578.07   | 468.82                      |
| 10   | MARYLAND      | 5,773,552        | 25,925.96   | 449.05                      |

ARCOS 3 - REPORT 04 by GRAMS  
CUMULATIVE DISTRIBUTION BY STATE PER 100K POPULATION

|    |                      |            |            |        |
|----|----------------------|------------|------------|--------|
| 11 | IDAHO                | 1,567,582  | 7,017.83   | 447.69 |
| 12 | VIRGINIA             | 8,001,024  | 35,762.70  | 446.98 |
| 13 | MAINE                | 1,328,361  | 5,821.30   | 438.23 |
| 14 | ALASKA               | 710,231    | 3,103.34   | 436.95 |
| 15 | OREGON               | 3,831,074  | 16,101.59  | 420.29 |
| 16 | SOUTH CAROLINA       | 4,625,364  | 19,421.63  | 419.89 |
| 17 | KANSAS               | 2,853,118  | 11,383.91  | 399.00 |
| 18 | MASSACHUSETTS        | 6,547,629  | 25,894.08  | 395.47 |
| 19 | PENNSYLVANIA         | 12,702,379 | 49,569.38  | 390.24 |
| 20 | NORTH CAROLINA       | 9,535,483  | 36,392.38  | 381.65 |
| 21 | MINNESOTA            | 5,303,925  | 20,235.00  | 381.51 |
| 22 | WYOMING              | 563,626    | 2,104.73   | 373.43 |
| 23 | NORTH DAKOTA         | 672,591    | 2,372.74   | 352.78 |
| 24 | UTAH                 | 2,763,885  | 9,669.19   | 349.84 |
| 25 | ARIZONA              | 6,392,017  | 22,219.02  | 347.61 |
| 26 | TENNESSEE            | 6,346,105  | 21,991.74  | 346.54 |
| 27 | ARKANSAS             | 2,915,918  | 9,997.50   | 342.86 |
| 28 | NEVADA               | 2,700,551  | 9,254.96   | 342.71 |
| 29 | CALIFORNIA           | 37,253,956 | 125,931.00 | 338.03 |
| 30 | MISSOURI             | 5,988,927  | 20,231.31  | 337.81 |
| 31 | NEW YORK             | 19,378,102 | 65,427.26  | 337.64 |
| 32 | NEW JERSEY           | 8,791,894  | 29,412.21  | 334.54 |
| 33 | OKLAHOMA             | 3,751,351  | 12,500.83  | 333.24 |
| 34 | IOWA                 | 3,046,355  | 9,579.33   | 314.45 |
| 35 | TEXAS                | 25,145,561 | 79,065.23  | 314.43 |
| 36 | INDIANA              | 6,483,802  | 19,162.53  | 295.54 |
| 37 | MICHIGAN             | 9,883,640  | 27,905.89  | 282.34 |
| 38 | DISTRICT OF COLUMBIA | 601,723    | 1,693.63   | 281.46 |
| 39 | GEORGIA              | 9,687,653  | 27,062.23  | 279.35 |
| 40 | RHODE ISLAND         | 1,052,567  | 2,748.77   | 261.15 |
| 41 | OHIO                 | 11,536,504 | 30,086.13  | 260.79 |
| 42 | ILLINOIS             | 12,830,632 | 32,527.78  | 253.52 |
| 43 | SOUTH DAKOTA         | 814,180    | 1,978.32   | 242.98 |
| 44 | LOUISIANA            | 4,533,372  | 10,872.08  | 239.82 |
| 45 | WEST VIRGINIA        | 1,852,994  | 4,423.85   | 238.74 |
| 46 | NEBRASKA             | 1,826,341  | 4,312.82   | 236.15 |
| 47 | ALABAMA              | 4,779,736  | 10,541.50  | 220.55 |
| 48 | NEW MEXICO           | 2,059,179  | 4,501.06   | 218.59 |
| 49 | KENTUCKY             | 4,339,367  | 9,461.73   | 218.04 |
| 50 | WISCONSIN            | 5,686,986  | 12,251.25  | 215.43 |
| 51 | HAWAII               | 1,360,301  | 2,061.45   | 151.54 |

|                                     |                |                    |                     |               |
|-------------------------------------|----------------|--------------------|---------------------|---------------|
| 52                                  | GUAM           | 178,430            | 90.51               | 50.73         |
| 53                                  | VIRGIN ISLANDS | 109,825            | 54.30               | 49.45         |
| 54                                  | PUERTO RICO    | 3,725,789          | 229.67              | 6.16          |
| 55                                  | AMERICAN SAMOA | 65,628             | 1.20                | 1.83          |
| <b>9150 - HYDROMORPHONE - Total</b> |                | <b>312,825,210</b> | <b>1,156,359.01</b> | <b>369.65</b> |

**DRUG: 9193 - HYDROCODONE**

| RANK | STATE NAME     | STATE POPULATION | TOTAL GRAMS  | TOTAL GRAMS/100K POPULATION |
|------|----------------|------------------|--------------|-----------------------------|
| 1    | ALABAMA        | 4,779,736        | 853,989.67   | 17,866.88                   |
| 2    | KENTUCKY       | 4,339,367        | 721,540.77   | 16,627.79                   |
| 3    | OKLAHOMA       | 3,751,351        | 617,228.70   | 16,453.50                   |
| 4    | ARKANSAS       | 2,915,918        | 455,126.05   | 15,608.33                   |
| 5    | TENNESSEE      | 6,346,105        | 826,341.72   | 13,021.24                   |
| 6    | IDAHO          | 1,567,582        | 201,065.09   | 12,826.45                   |
| 7    | MICHIGAN       | 9,883,640        | 1,224,853.66 | 12,392.74                   |
| 8    | LOUISIANA      | 4,533,372        | 558,850.42   | 12,327.48                   |
| 9    | MISSISSIPPI    | 2,967,297        | 364,061.06   | 12,269.11                   |
| 10   | INDIANA        | 6,483,802        | 783,520.77   | 12,084.28                   |
| 11   | NEVADA         | 2,700,551        | 301,063.15   | 11,148.21                   |
| 12   | WEST VIRGINIA  | 1,852,994        | 185,139.63   | 9,991.38                    |
| 13   | SOUTH CAROLINA | 4,625,364        | 456,367.25   | 9,866.62                    |
| 14   | MISSOURI       | 5,988,927        | 587,432.60   | 9,808.65                    |
| 15   | KANSAS         | 2,853,118        | 278,398.45   | 9,757.69                    |
| 16   | TEXAS          | 25,145,561       | 2,331,346.46 | 9,271.40                    |
| 17   | MONTANA        | 989,415          | 90,396.57    | 9,136.37                    |
| 18   | GEORGIA        | 9,687,653        | 842,836.92   | 8,700.11                    |
| 19   | OREGON         | 3,831,074        | 324,189.97   | 8,462.12                    |
| 20   | CALIFORNIA     | 37,253,956       | 3,133,870.80 | 8,412.18                    |
| 21   | ILLINOIS       | 12,830,632       | 1,030,067.59 | 8,028.19                    |
| 22   | UTAH           | 2,763,885        | 202,748.82   | 7,335.65                    |
| 23   | WYOMING        | 563,626          | 38,866.35    | 6,895.77                    |
| 24   | WASHINGTON     | 6,724,540        | 448,967.62   | 6,676.56                    |
| 25   | NORTH CAROLINA | 9,535,483        | 631,179.73   | 6,619.27                    |
| 26   | FLORIDA        | 18,801,310       | 1,202,457.69 | 6,395.61                    |
| 27   | IOWA           | 3,046,355        | 191,242.24   | 6,277.74                    |
| 28   | NEBRASKA       | 1,826,341        | 108,776.55   | 5,955.98                    |
| 29   | NEW MEXICO     | 2,059,179        | 121,799.47   | 5,914.95                    |
| 30   | SOUTH DAKOTA   | 814,180          | 47,831.94    | 5,874.86                    |
| 31   | ARIZONA        | 6,392,017        | 348,709.74   | 5,455.39                    |
| 32   | NORTH DAKOTA   | 672,591          | 35,511.20    | 5,279.76                    |
| 33   | ALASKA         | 710,231          | 36,920.76    | 5,198.42                    |
| 34   | OHIO           | 11,536,504       | 591,097.65   | 5,123.72                    |

|                                   |                      |                    |                      |                 |
|-----------------------------------|----------------------|--------------------|----------------------|-----------------|
| 35                                | WISCONSIN            | 5,686,986          | 269,208.06           | 4,733.76        |
| 36                                | MAINE                | 1,328,361          | 60,385.18            | 4,545.84        |
| 37                                | HAWAII               | 1,360,301          | 60,411.22            | 4,441.02        |
| 38                                | COLORADO             | 5,029,196          | 217,650.10           | 4,327.73        |
| 39                                | VIRGINIA             | 8,001,024          | 340,536.39           | 4,256.16        |
| 40                                | PENNSYLVANIA         | 12,702,379         | 537,571.41           | 4,232.05        |
| 41                                | RHODE ISLAND         | 1,052,567          | 34,349.40            | 3,263.39        |
| 42                                | NEW YORK             | 19,378,102         | 578,840.51           | 2,987.09        |
| 43                                | MINNESOTA            | 5,303,925          | 149,219.75           | 2,813.38        |
| 44                                | VERMONT              | 625,741            | 16,413.53            | 2,623.06        |
| 45                                | NEW HAMPSHIRE        | 1,316,470          | 31,136.29            | 2,365.13        |
| 46                                | DELAWARE             | 897,934            | 20,062.33            | 2,234.28        |
| 47                                | MARYLAND             | 5,773,552          | 113,832.50           | 1,971.62        |
| 48                                | CONNECTICUT          | 3,574,097          | 67,444.03            | 1,887.02        |
| 49                                | MASSACHUSETTS        | 6,547,629          | 101,834.93           | 1,555.29        |
| 50                                | NEW JERSEY           | 8,791,894          | 113,786.23           | 1,294.22        |
| 51                                | VIRGIN ISLANDS       | 109,825            | 968.81               | 882.14          |
| 52                                | DISTRICT OF COLUMBIA | 601,723            | 4,601.98             | 764.80          |
| 53                                | GUAM                 | 178,430            | 496.46               | 278.24          |
| 54                                | PUERTO RICO          | 3,725,789          | 1,840.64             | 49.40           |
| 55                                | AMERICAN SAMOA       | 65,628             | 3.63                 | 5.53            |
| <b>9193 - HYDROCODONE - Total</b> |                      | <b>312,825,210</b> | <b>22,894,390.46</b> | <b>7,318.59</b> |

**DRUG: 9230 - MEPERIDINE (PETHIDINE)**

| RANK | STATE NAME     | STATE POPULATION | TOTAL GRAMS | TOTAL GRAMS/100K POPULATION |
|------|----------------|------------------|-------------|-----------------------------|
| 1    | ARKANSAS       | 2,915,918        | 22,644.77   | 776.59                      |
| 2    | OKLAHOMA       | 3,751,351        | 21,273.95   | 567.10                      |
| 3    | ALABAMA        | 4,779,736        | 25,225.33   | 527.76                      |
| 4    | LOUISIANA      | 4,533,372        | 22,573.07   | 497.93                      |
| 5    | MISSISSIPPI    | 2,967,297        | 13,462.89   | 453.71                      |
| 6    | VIRGIN ISLANDS | 109,825          | 460.26      | 419.09                      |
| 7    | SOUTH CAROLINA | 4,625,364        | 17,265.94   | 373.29                      |
| 8    | TENNESSEE      | 6,346,105        | 22,063.53   | 347.67                      |
| 9    | GEORGIA        | 9,687,653        | 33,459.87   | 345.39                      |
| 10   | PUERTO RICO    | 3,725,789        | 12,482.60   | 335.03                      |
| 11   | ARIZONA        | 6,392,017        | 18,362.98   | 287.28                      |
| 12   | ALASKA         | 710,231          | 1,796.05    | 252.88                      |
| 13   | NEW MEXICO     | 2,059,179        | 5,095.22    | 247.44                      |
| 14   | VIRGINIA       | 8,001,024        | 18,798.80   | 234.95                      |
| 15   | SOUTH DAKOTA   | 814,180          | 1,883.20    | 231.30                      |
| 16   | UTAH           | 2,763,885        | 6,333.04    | 229.14                      |
| 17   | WYOMING        | 563,626          | 1,253.54    | 222.41                      |

|                                              |                      |                    |                   |               |
|----------------------------------------------|----------------------|--------------------|-------------------|---------------|
| 18                                           | IOWA                 | 3,046,355          | 6,587.62          | 216.25        |
| 19                                           | MONTANA              | 989,415            | 2,034.30          | 205.61        |
| 20                                           | KENTUCKY             | 4,339,367          | 8,548.63          | 197.00        |
| 21                                           | KANSAS               | 2,853,118          | 5,423.02          | 190.07        |
| 22                                           | NEVADA               | 2,700,551          | 5,113.09          | 189.34        |
| 23                                           | MISSOURI             | 5,988,927          | 11,314.68         | 188.93        |
| 24                                           | NORTH CAROLINA       | 9,535,483          | 17,756.16         | 186.21        |
| 25                                           | IDAHO                | 1,567,582          | 2,787.71          | 177.84        |
| 26                                           | WASHINGTON           | 6,724,540          | 11,406.39         | 169.62        |
| 27                                           | VERMONT              | 625,741            | 1,056.37          | 168.82        |
| 28                                           | CALIFORNIA           | 37,253,956         | 62,040.45         | 166.53        |
| 29                                           | TEXAS                | 25,145,561         | 41,865.15         | 166.49        |
| 30                                           | NEW HAMPSHIRE        | 1,316,470          | 2,188.99          | 166.28        |
| 31                                           | INDIANA              | 6,483,802          | 10,744.61         | 165.71        |
| 32                                           | FLORIDA              | 18,801,310         | 29,933.08         | 159.21        |
| 33                                           | OHIO                 | 11,536,504         | 16,594.92         | 143.85        |
| 34                                           | MARYLAND             | 5,773,552          | 7,698.40          | 133.34        |
| 35                                           | OREGON               | 3,831,074          | 4,570.58          | 119.30        |
| 36                                           | COLORADO             | 5,029,196          | 5,689.91          | 113.14        |
| 37                                           | NORTH DAKOTA         | 672,591            | 752.98            | 111.95        |
| 38                                           | WEST VIRGINIA        | 1,852,994          | 1,982.55          | 106.99        |
| 39                                           | MASSACHUSETTS        | 6,547,629          | 6,967.80          | 106.42        |
| 40                                           | NEBRASKA             | 1,826,341          | 1,936.56          | 106.03        |
| 41                                           | DISTRICT OF COLUMBIA | 601,723            | 635.65            | 105.64        |
| 42                                           | CONNECTICUT          | 3,574,097          | 3,694.83          | 103.38        |
| 43                                           | MAINE                | 1,328,361          | 1,313.35          | 98.87         |
| 44                                           | MICHIGAN             | 9,883,640          | 9,360.65          | 94.71         |
| 45                                           | PENNSYLVANIA         | 12,702,379         | 11,726.05         | 92.31         |
| 46                                           | HAWAII               | 1,360,301          | 1,234.48          | 90.75         |
| 47                                           | NEW YORK             | 19,378,102         | 15,723.47         | 81.14         |
| 48                                           | ILLINOIS             | 12,830,632         | 9,612.69          | 74.92         |
| 49                                           | NEW JERSEY           | 8,791,894          | 6,270.22          | 71.32         |
| 50                                           | WISCONSIN            | 5,686,986          | 4,033.89          | 70.93         |
| 51                                           | GUAM                 | 178,430            | 120.92            | 67.77         |
| 52                                           | RHODE ISLAND         | 1,052,567          | 657.98            | 62.51         |
| 53                                           | DELAWARE             | 897,934            | 560.37            | 62.41         |
| 54                                           | MINNESOTA            | 5,303,925          | 2,151.45          | 40.56         |
| <b>9230 - MEPERIDINE (PETHIDINE) - Total</b> |                      | <b>312,825,210</b> | <b>576,525.04</b> | <b>184.30</b> |

**DRUG: 9250B - METHADONE**

| RANK | STATE NAME   | STATE POPULATION | TOTAL GRAMS | TOTAL GRAMS/100K POPULATION |
|------|--------------|------------------|-------------|-----------------------------|
| 1    | RHODE ISLAND | 1,052,567        | 169,150.99  | 16,070.33                   |

ARCOS 3 - REPORT 04 by GRAMS  
CUMULATIVE DISTRIBUTION BY STATE PER 100K POPULATION

|    |                      |            |              |           |
|----|----------------------|------------|--------------|-----------|
| 2  | DELAWARE             | 897,934    | 124,914.59   | 13,911.33 |
| 3  | MARYLAND             | 5,773,552  | 716,136.84   | 12,403.75 |
| 4  | CONNECTICUT          | 3,574,097  | 416,944.15   | 11,665.72 |
| 5  | VERMONT              | 625,741    | 71,902.07    | 11,490.71 |
| 6  | NEW HAMPSHIRE        | 1,316,470  | 119,869.81   | 9,105.40  |
| 7  | NEW MEXICO           | 2,059,179  | 171,486.44   | 8,327.90  |
| 8  | MAINE                | 1,328,361  | 106,318.22   | 8,003.71  |
| 9  | MASSACHUSETTS        | 6,547,629  | 518,795.21   | 7,923.41  |
| 10 | ALABAMA              | 4,779,736  | 286,425.34   | 5,992.49  |
| 11 | OREGON               | 3,831,074  | 227,514.24   | 5,938.65  |
| 12 | DISTRICT OF COLUMBIA | 601,723    | 35,411.84    | 5,885.07  |
| 13 | NEW YORK             | 19,378,102 | 1,126,619.92 | 5,813.88  |
| 14 | PENNSYLVANIA         | 12,702,379 | 714,088.79   | 5,621.69  |
| 15 | WASHINGTON           | 6,724,540  | 371,488.86   | 5,524.38  |
| 16 | ARIZONA              | 6,392,017  | 352,991.18   | 5,522.38  |
| 17 | NEW JERSEY           | 8,791,894  | 468,515.25   | 5,328.95  |
| 18 | NORTH CAROLINA       | 9,535,483  | 507,851.46   | 5,325.91  |
| 19 | NEVADA               | 2,700,551  | 136,567.19   | 5,057.01  |
| 20 | MICHIGAN             | 9,883,640  | 489,774.33   | 4,955.40  |
| 21 | ALASKA               | 710,231    | 32,983.59    | 4,644.07  |
| 22 | GEORGIA              | 9,687,653  | 449,234.91   | 4,637.19  |
| 23 | INDIANA              | 6,483,802  | 300,324.12   | 4,631.91  |
| 24 | KENTUCKY             | 4,339,367  | 199,116.82   | 4,588.61  |
| 25 | WEST VIRGINIA        | 1,852,994  | 83,168.91    | 4,488.35  |
| 26 | SOUTH CAROLINA       | 4,625,364  | 199,062.05   | 4,303.71  |
| 27 | MINNESOTA            | 5,303,925  | 219,092.58   | 4,130.76  |
| 28 | FLORIDA              | 18,801,310 | 755,030.06   | 4,015.84  |
| 29 | WISCONSIN            | 5,686,986  | 226,966.10   | 3,990.97  |
| 30 | VIRGINIA             | 8,001,024  | 318,323.92   | 3,978.54  |
| 31 | ILLINOIS             | 12,830,632 | 475,709.38   | 3,707.61  |
| 32 | OKLAHOMA             | 3,751,351  | 137,476.97   | 3,664.73  |
| 33 | COLORADO             | 5,029,196  | 180,034.13   | 3,579.78  |
| 34 | UTAH                 | 2,763,885  | 97,523.41    | 3,528.49  |
| 35 | CALIFORNIA           | 37,253,956 | 1,209,856.28 | 3,247.59  |
| 36 | MONTANA              | 989,415    | 32,019.70    | 3,236.23  |
| 37 | LOUISIANA            | 4,533,372  | 138,294.90   | 3,050.60  |
| 38 | TENNESSEE            | 6,346,105  | 192,959.96   | 3,040.60  |
| 39 | KANSAS               | 2,853,118  | 83,501.09    | 2,926.66  |
| 40 | IDAHO                | 1,567,582  | 41,464.29    | 2,645.11  |
| 41 | OHIO                 | 11,536,504 | 293,936.59   | 2,547.88  |
| 42 | MISSOURI             | 5,988,927  | 147,068.11   | 2,455.67  |

|                                  |                |                    |                      |                 |
|----------------------------------|----------------|--------------------|----------------------|-----------------|
| 43                               | NORTH DAKOTA   | 672,591            | 15,873.99            | 2,360.13        |
| 44                               | PUERTO RICO    | 3,725,789          | 86,835.15            | 2,330.65        |
| 45                               | TEXAS          | 25,145,561         | 518,644.06           | 2,062.57        |
| 46                               | HAWAII         | 1,360,301          | 27,894.99            | 2,050.65        |
| 47                               | ARKANSAS       | 2,915,918          | 53,687.52            | 1,841.19        |
| 48                               | IOWA           | 3,046,355          | 49,162.93            | 1,613.83        |
| 49                               | NEBRASKA       | 1,826,341          | 28,353.89            | 1,552.50        |
| 50                               | MISSISSIPPI    | 2,967,297          | 29,343.56            | 988.90          |
| 51                               | SOUTH DAKOTA   | 814,180            | 7,590.86             | 932.33          |
| 52                               | WYOMING        | 563,626            | 3,757.46             | 666.66          |
| 53                               | VIRGIN ISLANDS | 109,825            | 564.37               | 513.88          |
| 54                               | GUAM           | 178,430            | 163.23               | 91.48           |
| <b>9250B - METHADONE - Total</b> |                | <b>312,825,210</b> | <b>13,767,786.63</b> | <b>4,401.11</b> |

**DRUG: 9300 - MORPHINE**

| RANK | STATE NAME     | STATE POPULATION | TOTAL GRAMS  | TOTAL GRAMS/100K POPULATION |
|------|----------------|------------------|--------------|-----------------------------|
| 1    | TENNESSEE      | 6,346,105        | 516,867.55   | 8,144.64                    |
| 2    | DELAWARE       | 897,934          | 72,828.05    | 8,110.62                    |
| 3    | ARIZONA        | 6,392,017        | 487,302.18   | 7,623.61                    |
| 4    | OKLAHOMA       | 3,751,351        | 279,544.04   | 7,451.82                    |
| 5    | FLORIDA        | 18,801,310       | 1,366,324.49 | 7,267.18                    |
| 6    | NEVADA         | 2,700,551        | 186,100.47   | 6,891.20                    |
| 7    | IDAHO          | 1,567,582        | 97,004.47    | 6,188.16                    |
| 8    | OREGON         | 3,831,074        | 236,852.29   | 6,182.40                    |
| 9    | UTAH           | 2,763,885        | 170,710.63   | 6,176.47                    |
| 10   | MICHIGAN       | 9,883,640        | 597,527.79   | 6,045.62                    |
| 11   | PENNSYLVANIA   | 12,702,379       | 761,427.79   | 5,994.37                    |
| 12   | MONTANA        | 989,415          | 59,232.61    | 5,986.63                    |
| 13   | VERMONT        | 625,741          | 36,736.12    | 5,870.82                    |
| 14   | ALASKA         | 710,231          | 40,739.77    | 5,736.13                    |
| 15   | WASHINGTON     | 6,724,540        | 365,578.40   | 5,436.48                    |
| 16   | WYOMING        | 563,626          | 30,487.23    | 5,409.12                    |
| 17   | MISSOURI       | 5,988,927        | 320,902.84   | 5,358.27                    |
| 18   | KANSAS         | 2,853,118        | 151,945.16   | 5,325.58                    |
| 19   | HAWAII         | 1,360,301        | 70,142.67    | 5,156.41                    |
| 20   | COLORADO       | 5,029,196        | 255,202.66   | 5,074.42                    |
| 21   | ALABAMA        | 4,779,736        | 240,316.58   | 5,027.82                    |
| 22   | SOUTH CAROLINA | 4,625,364        | 231,992.09   | 5,015.65                    |
| 23   | NEW HAMPSHIRE  | 1,316,470        | 65,379.49    | 4,966.27                    |
| 24   | ARKANSAS       | 2,915,918        | 139,816.32   | 4,794.93                    |
| 25   | WISCONSIN      | 5,686,986        | 256,554.79   | 4,511.26                    |
| 26   | MISSISSIPPI    | 2,967,297        | 131,749.38   | 4,440.05                    |

|                                |                      |                    |                      |                 |
|--------------------------------|----------------------|--------------------|----------------------|-----------------|
| 27                             | NORTH CAROLINA       | 9,535,483          | 423,216.02           | 4,438.33        |
| 28                             | INDIANA              | 6,483,802          | 285,682.76           | 4,406.10        |
| 29                             | MAINE                | 1,328,361          | 56,452.30            | 4,249.77        |
| 30                             | MARYLAND             | 5,773,552          | 243,565.36           | 4,218.64        |
| 31                             | NEW MEXICO           | 2,059,179          | 85,968.84            | 4,174.91        |
| 32                             | GEORGIA              | 9,687,653          | 396,580.59           | 4,093.67        |
| 33                             | LOUISIANA            | 4,533,372          | 184,759.40           | 4,075.54        |
| 34                             | CALIFORNIA           | 37,253,956         | 1,480,022.97         | 3,972.79        |
| 35                             | WEST VIRGINIA        | 1,852,994          | 71,254.72            | 3,845.38        |
| 36                             | IOWA                 | 3,046,355          | 115,481.64           | 3,790.81        |
| 37                             | NEBRASKA             | 1,826,341          | 67,184.01            | 3,678.61        |
| 38                             | RHODE ISLAND         | 1,052,567          | 37,939.75            | 3,604.50        |
| 39                             | KENTUCKY             | 4,339,367          | 155,670.20           | 3,587.39        |
| 40                             | MASSACHUSETTS        | 6,547,629          | 230,987.59           | 3,527.81        |
| 41                             | SOUTH DAKOTA         | 814,180            | 28,680.91            | 3,522.67        |
| 42                             | CONNECTICUT          | 3,574,097          | 123,130.87           | 3,445.09        |
| 43                             | OHIO                 | 11,536,504         | 395,505.12           | 3,428.29        |
| 44                             | VIRGINIA             | 8,001,024          | 270,434.11           | 3,379.99        |
| 45                             | NEW JERSEY           | 8,791,894          | 283,232.06           | 3,221.51        |
| 46                             | NORTH DAKOTA         | 672,591            | 21,527.80            | 3,200.73        |
| 47                             | MINNESOTA            | 5,303,925          | 154,958.95           | 2,921.59        |
| 48                             | ILLINOIS             | 12,830,632         | 362,445.64           | 2,824.85        |
| 49                             | TEXAS                | 25,145,561         | 707,722.35           | 2,814.50        |
| 50                             | NEW YORK             | 19,378,102         | 531,155.65           | 2,741.01        |
| 51                             | DISTRICT OF COLUMBIA | 601,723            | 11,875.70            | 1,973.62        |
| 52                             | GUAM                 | 178,430            | 3,366.70             | 1,886.84        |
| 53                             | VIRGIN ISLANDS       | 109,825            | 471.76               | 429.56          |
| 54                             | PUERTO RICO          | 3,725,789          | 6,835.05             | 183.45          |
| 55                             | AMERICAN SAMOA       | 65,628             | 48.58                | 74.02           |
| <b>9300 - MORPHINE - Total</b> |                      | <b>312,825,210</b> | <b>13,905,423.24</b> | <b>4,445.11</b> |

**DRUG: 9652 - OXYMORPHONE**

| RANK | STATE NAME     | STATE POPULATION | TOTAL GRAMS | TOTAL GRAMS/100K POPULATION |
|------|----------------|------------------|-------------|-----------------------------|
| 1    | TENNESSEE      | 6,346,105        | 49,864.82   | 785.75                      |
| 2    | DELAWARE       | 897,934          | 5,869.75    | 653.70                      |
| 3    | MICHIGAN       | 9,883,640        | 46,656.74   | 472.06                      |
| 4    | NORTH CAROLINA | 9,535,483        | 39,895.46   | 418.39                      |
| 5    | MARYLAND       | 5,773,552        | 23,443.03   | 406.04                      |
| 6    | PENNSYLVANIA   | 12,702,379       | 49,609.24   | 390.55                      |
| 7    | UTAH           | 2,763,885        | 10,680.19   | 386.42                      |
| 8    | LOUISIANA      | 4,533,372        | 15,606.04   | 344.25                      |
| 9    | WEST VIRGINIA  | 1,852,994        | 5,161.82    | 278.57                      |



ARCOS 3 - REPORT 04 by GRAMS  
CUMULATIVE DISTRIBUTION BY STATE PER 100K POPULATION

|    |                      |            |           |        |
|----|----------------------|------------|-----------|--------|
| 10 | VIRGINIA             | 8,001,024  | 22,109.05 | 276.33 |
| 11 | SOUTH CAROLINA       | 4,625,364  | 12,434.89 | 268.84 |
| 12 | NEVADA               | 2,700,551  | 6,485.70  | 240.16 |
| 13 | OKLAHOMA             | 3,751,351  | 8,405.86  | 224.08 |
| 14 | FLORIDA              | 18,801,310 | 40,978.08 | 217.95 |
| 15 | NEW YORK             | 19,378,102 | 41,890.83 | 216.18 |
| 16 | MISSISSIPPI          | 2,967,297  | 5,835.90  | 196.67 |
| 17 | IDAHO                | 1,567,582  | 2,886.52  | 184.14 |
| 18 | ALABAMA              | 4,779,736  | 8,451.22  | 176.81 |
| 19 | KENTUCKY             | 4,339,367  | 7,389.04  | 170.28 |
| 20 | OHIO                 | 11,536,504 | 17,986.18 | 155.91 |
| 21 | CONNECTICUT          | 3,574,097  | 5,373.79  | 150.35 |
| 22 | NEW JERSEY           | 8,791,894  | 13,155.09 | 149.63 |
| 23 | SOUTH DAKOTA         | 814,180    | 1,154.07  | 141.75 |
| 24 | ARIZONA              | 6,392,017  | 8,717.81  | 136.39 |
| 25 | INDIANA              | 6,483,802  | 8,771.53  | 135.28 |
| 26 | MAINE                | 1,328,361  | 1,788.17  | 134.61 |
| 27 | NEW HAMPSHIRE        | 1,316,470  | 1,677.33  | 127.41 |
| 28 | GEORGIA              | 9,687,653  | 11,409.65 | 117.78 |
| 29 | NEBRASKA             | 1,826,341  | 2,114.95  | 115.80 |
| 30 | MISSOURI             | 5,988,927  | 6,912.21  | 115.42 |
| 31 | KANSAS               | 2,853,118  | 3,217.72  | 112.78 |
| 32 | COLORADO             | 5,029,196  | 5,597.88  | 111.31 |
| 33 | WYOMING              | 563,626    | 548.28    | 97.28  |
| 34 | OREGON               | 3,831,074  | 3,697.49  | 96.51  |
| 35 | VERMONT              | 625,741    | 557.21    | 89.05  |
| 36 | NEW MEXICO           | 2,059,179  | 1,771.04  | 86.01  |
| 37 | WASHINGTON           | 6,724,540  | 5,724.69  | 85.13  |
| 38 | ALASKA               | 710,231    | 542.93    | 76.44  |
| 39 | TEXAS                | 25,145,561 | 18,237.57 | 72.53  |
| 40 | ARKANSAS             | 2,915,918  | 2,041.35  | 70.01  |
| 41 | RHODE ISLAND         | 1,052,567  | 681.30    | 64.73  |
| 42 | HAWAII               | 1,360,301  | 860.70    | 63.27  |
| 43 | MASSACHUSETTS        | 6,547,629  | 4,123.06  | 62.97  |
| 44 | CALIFORNIA           | 37,253,956 | 23,056.55 | 61.89  |
| 45 | WISCONSIN            | 5,686,986  | 3,340.29  | 58.74  |
| 46 | ILLINOIS             | 12,830,632 | 7,480.57  | 58.30  |
| 47 | IOWA                 | 3,046,355  | 1,725.72  | 56.65  |
| 48 | MONTANA              | 989,415    | 518.18    | 52.37  |
| 49 | NORTH DAKOTA         | 672,591    | 301.04    | 44.76  |
| 50 | DISTRICT OF COLUMBIA | 601,723    | 261.88    | 43.52  |

|                                   |           |                    |                   |               |
|-----------------------------------|-----------|--------------------|-------------------|---------------|
| 51                                | MINNESOTA | 5,303,925          | 865.43            | 16.32         |
| <b>9652 - OXYMORPHONE - Total</b> |           | <b>312,825,210</b> | <b>567,865.82</b> | <b>181.53</b> |

**DRUG: 9780 - TAPENTADOL**

| RANK | STATE NAME     | STATE POPULATION | TOTAL GRAMS | TOTAL GRAMS/100K POPULATION |
|------|----------------|------------------|-------------|-----------------------------|
| 1    | NORTH CAROLINA | 9,535,483        | 331,833.50  | 3,479.99                    |
| 2    | ALABAMA        | 4,779,736        | 164,304.00  | 3,437.51                    |
| 3    | SOUTH CAROLINA | 4,625,364        | 141,231.00  | 3,053.40                    |
| 4    | DELAWARE       | 897,934          | 21,904.50   | 2,439.43                    |
| 5    | GEORGIA        | 9,687,653        | 205,039.50  | 2,116.50                    |
| 6    | NEBRASKA       | 1,826,341        | 37,054.50   | 2,028.89                    |
| 7    | COLORADO       | 5,029,196        | 101,234.50  | 2,012.94                    |
| 8    | ARKANSAS       | 2,915,918        | 54,757.00   | 1,877.86                    |
| 9    | INDIANA        | 6,483,802        | 120,317.50  | 1,855.66                    |
| 10   | NEW HAMPSHIRE  | 1,316,470        | 24,291.50   | 1,845.20                    |
| 11   | ARIZONA        | 6,392,017        | 117,264.50  | 1,834.55                    |
| 12   | SOUTH DAKOTA   | 814,180          | 14,868.00   | 1,826.13                    |
| 13   | MARYLAND       | 5,773,552        | 102,642.50  | 1,777.81                    |
| 14   | OKLAHOMA       | 3,751,351        | 62,946.00   | 1,677.96                    |
| 15   | TENNESSEE      | 6,346,105        | 103,470.50  | 1,630.46                    |
| 16   | PENNSYLVANIA   | 12,702,379       | 204,600.50  | 1,610.73                    |
| 17   | OHIO           | 11,536,504       | 183,726.55  | 1,592.57                    |
| 18   | NEW YORK       | 19,378,102       | 307,610.50  | 1,587.41                    |
| 19   | VIRGINIA       | 8,001,024        | 126,117.00  | 1,576.26                    |
| 20   | FLORIDA        | 18,801,310       | 291,269.50  | 1,549.20                    |
| 21   | NEW JERSEY     | 8,791,894        | 134,741.00  | 1,532.56                    |
| 22   | UTAH           | 2,763,885        | 42,228.00   | 1,527.85                    |
| 23   | IDAHO          | 1,567,582        | 21,826.50   | 1,392.37                    |
| 24   | MISSOURI       | 5,988,927        | 81,250.00   | 1,356.67                    |
| 25   | NEVADA         | 2,700,551        | 34,767.00   | 1,287.40                    |
| 26   | IOWA           | 3,046,355        | 37,105.50   | 1,218.03                    |
| 27   | MISSISSIPPI    | 2,967,297        | 35,986.00   | 1,212.75                    |
| 28   | TEXAS          | 25,145,561       | 301,778.45  | 1,200.13                    |
| 29   | LOUISIANA      | 4,533,372        | 53,042.50   | 1,170.05                    |
| 30   | WYOMING        | 563,626          | 6,396.50    | 1,134.88                    |
| 31   | ALASKA         | 710,231          | 8,010.50    | 1,127.87                    |
| 32   | KENTUCKY       | 4,339,367        | 47,785.50   | 1,101.21                    |
| 33   | NORTH DAKOTA   | 672,591          | 7,226.00    | 1,074.35                    |
| 34   | MASSACHUSETTS  | 6,547,629        | 66,057.50   | 1,008.88                    |
| 35   | CONNECTICUT    | 3,574,097        | 34,137.50   | 955.14                      |
| 36   | KANSAS         | 2,853,118        | 25,969.50   | 910.21                      |
| 37   | ILLINOIS       | 12,830,632       | 113,977.00  | 888.32                      |

|                                  |                      |                    |                     |                 |
|----------------------------------|----------------------|--------------------|---------------------|-----------------|
| 38                               | WEST VIRGINIA        | 1,852,994          | 16,373.50           | 883.62          |
| 39                               | CALIFORNIA           | 37,253,956         | 323,719.23          | 868.95          |
| 40                               | WASHINGTON           | 6,724,540          | 56,908.50           | 846.28          |
| 41                               | WISCONSIN            | 5,686,986          | 44,365.65           | 780.13          |
| 42                               | RHODE ISLAND         | 1,052,567          | 7,568.50            | 719.05          |
| 43                               | MICHIGAN             | 9,883,640          | 67,530.50           | 683.26          |
| 44                               | OREGON               | 3,831,074          | 24,794.50           | 647.19          |
| 45                               | VERMONT              | 625,741            | 3,888.50            | 621.42          |
| 46                               | MONTANA              | 989,415            | 6,127.50            | 619.31          |
| 47                               | HAWAII               | 1,360,301          | 8,082.00            | 594.13          |
| 48                               | DISTRICT OF COLUMBIA | 601,723            | 3,366.00            | 559.39          |
| 49                               | NEW MEXICO           | 2,059,179          | 10,204.50           | 495.56          |
| 50                               | MAINE                | 1,328,361          | 4,696.00            | 353.52          |
| 51                               | MINNESOTA            | 5,303,925          | 14,950.50           | 281.88          |
| 52                               | PUERTO RICO          | 3,725,789          | 1,956.00            | 52.50           |
| 53                               | VIRGIN ISLANDS       | 109,825            | 5.00                | 4.55            |
| <b>9780 - TAPENTADOL - Total</b> |                      | <b>312,825,210</b> | <b>4,363,304.38</b> | <b>1,394.81</b> |

**DRUG: 9801 - FENTANYL BASE**

| RANK | STATE NAME     | STATE POPULATION | TOTAL GRAMS | TOTAL GRAMS/100K POPULATION |
|------|----------------|------------------|-------------|-----------------------------|
| 1    | MISSISSIPPI    | 2,967,297        | 3,879.72    | 130.75                      |
| 2    | IDAHO          | 1,567,582        | 1,983.31    | 126.52                      |
| 3    | OKLAHOMA       | 3,751,351        | 4,648.89    | 123.93                      |
| 4    | KANSAS         | 2,853,118        | 3,456.97    | 121.16                      |
| 5    | PENNSYLVANIA   | 12,702,379       | 15,256.11   | 120.10                      |
| 6    | MISSOURI       | 5,988,927        | 6,775.65    | 113.14                      |
| 7    | DELAWARE       | 897,934          | 1,008.02    | 112.26                      |
| 8    | SOUTH DAKOTA   | 814,180          | 907.99      | 111.52                      |
| 9    | NORTH DAKOTA   | 672,591          | 739.73      | 109.98                      |
| 10   | MONTANA        | 989,415          | 1,060.63    | 107.20                      |
| 11   | ALASKA         | 710,231          | 737.16      | 103.79                      |
| 12   | FLORIDA        | 18,801,310       | 18,610.14   | 98.98                       |
| 13   | UTAH           | 2,763,885        | 2,688.99    | 97.29                       |
| 14   | NEBRASKA       | 1,826,341        | 1,767.93    | 96.80                       |
| 15   | IOWA           | 3,046,355        | 2,923.85    | 95.98                       |
| 16   | ALABAMA        | 4,779,736        | 4,573.12    | 95.68                       |
| 17   | VERMONT        | 625,741          | 597.57      | 95.50                       |
| 18   | MICHIGAN       | 9,883,640        | 9,405.95    | 95.17                       |
| 19   | TENNESSEE      | 6,346,105        | 5,976.32    | 94.17                       |
| 20   | WEST VIRGINIA  | 1,852,994        | 1,710.68    | 92.32                       |
| 21   | NORTH CAROLINA | 9,535,483        | 8,701.98    | 91.26                       |
| 22   | GEORGIA        | 9,687,653        | 8,789.93    | 90.73                       |

|                                     |                      |                    |                   |              |
|-------------------------------------|----------------------|--------------------|-------------------|--------------|
| 23                                  | ARKANSAS             | 2,915,918          | 2,641.19          | 90.58        |
| 24                                  | INDIANA              | 6,483,802          | 5,844.02          | 90.13        |
| 25                                  | SOUTH CAROLINA       | 4,625,364          | 4,076.33          | 88.13        |
| 26                                  | WYOMING              | 563,626            | 490.71            | 87.06        |
| 27                                  | NEW JERSEY           | 8,791,894          | 7,400.76          | 84.18        |
| 28                                  | NEW HAMPSHIRE        | 1,316,470          | 1,103.65          | 83.83        |
| 29                                  | MAINE                | 1,328,361          | 1,101.74          | 82.94        |
| 30                                  | KENTUCKY             | 4,339,367          | 3,557.68          | 81.99        |
| 31                                  | CONNECTICUT          | 3,574,097          | 2,930.12          | 81.98        |
| 32                                  | WISCONSIN            | 5,686,986          | 4,557.74          | 80.14        |
| 33                                  | LOUISIANA            | 4,533,372          | 3,603.52          | 79.49        |
| 34                                  | ARIZONA              | 6,392,017          | 5,025.61          | 78.62        |
| 35                                  | COLORADO             | 5,029,196          | 3,885.98          | 77.27        |
| 36                                  | OREGON               | 3,831,074          | 2,902.19          | 75.75        |
| 37                                  | ILLINOIS             | 12,830,632         | 9,515.16          | 74.16        |
| 38                                  | WASHINGTON           | 6,724,540          | 4,858.73          | 72.25        |
| 39                                  | TEXAS                | 25,145,561         | 17,988.16         | 71.54        |
| 40                                  | MARYLAND             | 5,773,552          | 4,070.73          | 70.51        |
| 41                                  | NEW YORK             | 19,378,102         | 13,402.72         | 69.16        |
| 42                                  | VIRGINIA             | 8,001,024          | 5,308.84          | 66.35        |
| 43                                  | NEW MEXICO           | 2,059,179          | 1,350.36          | 65.58        |
| 44                                  | MASSACHUSETTS        | 6,547,629          | 4,275.14          | 65.29        |
| 45                                  | OHIO                 | 11,536,504         | 7,182.96          | 62.26        |
| 46                                  | NEVADA               | 2,700,551          | 1,660.62          | 61.49        |
| 47                                  | MINNESOTA            | 5,303,925          | 3,222.99          | 60.77        |
| 48                                  | CALIFORNIA           | 37,253,956         | 21,565.83         | 57.89        |
| 49                                  | RHODE ISLAND         | 1,052,567          | 574.96            | 54.62        |
| 50                                  | DISTRICT OF COLUMBIA | 601,723            | 287.34            | 47.75        |
| 51                                  | HAWAII               | 1,360,301          | 620.30            | 45.60        |
| 52                                  | GUAM                 | 178,430            | 32.77             | 18.37        |
| 53                                  | VIRGIN ISLANDS       | 109,825            | 17.93             | 16.33        |
| 54                                  | PUERTO RICO          | 3,725,789          | 488.81            | 13.12        |
| 55                                  | AMERICAN SAMOA       | 65,628             | 0.37              | 0.56         |
| <b>9801 - FENTANYL BASE - Total</b> |                      | <b>312,825,210</b> | <b>251,746.63</b> | <b>80.48</b> |

**STATE: AK - ALASKA****BUSINESS ACTIVITY: A - PHARMACIES**

| DRUG NAME                        | DRUG CODE | NUMBER OF REGISTRANT SOLD TO | TOTAL GRAMS | AVG GRAMS |
|----------------------------------|-----------|------------------------------|-------------|-----------|
| AMPHETAMINE                      | 1100      | 108                          | 27,406.71   | 253.77    |
| METHAMPHETAMINE                  | 1105      | 4                            | 7.63        | 1.91      |
| LISDEXAMFETAMINE                 | 1205      | 100                          | 9,553.10    | 95.53     |
| METHYLPHENIDATE (DL;D;L;ISOMERS) | 1724      | 108                          | 24,299.27   | 224.99    |
| CODEINE                          | 9050      | 110                          | 17,228.42   | 156.62    |
| BUPRENORPHINE                    | 9064      | 105                          | 9,581.95    | 91.26     |
| OXYCODONE                        | 9143      | 113                          | 108,084.87  | 956.50    |
| HYDROMORPHINE                    | 9150      | 97                           | 2,526.35    | 26.04     |
| HYDROCODONE                      | 9193      | 111                          | 32,667.02   | 294.30    |
| MEPERIDINE (PETHIDINE)           | 9230      | 49                           | 1,453.99    | 29.67     |
| METHADONE                        | 9250B     | 94                           | 12,887.68   | 137.10    |
| MORPHINE                         | 9300      | 110                          | 34,063.89   | 309.67    |
| OXYMORPHINE                      | 9652      | 22                           | 541.15      | 24.60     |
| TAPENTADOL                       | 9780      | 55                           | 7,538.50    | 137.06    |
| FENTANYL BASE                    | 9801      | 105                          | 601.99      | 5.73      |

**BUSINESS ACTIVITY: B - HOSPITALS**

| DRUG NAME                        | DRUG CODE | NUMBER OF REGISTRANT SOLD TO | TOTAL GRAMS | AVG GRAMS |
|----------------------------------|-----------|------------------------------|-------------|-----------|
| AMPHETAMINE                      | 1100      | 26                           | 6,493.98    | 249.77    |
| LISDEXAMFETAMINE                 | 1205      | 17                           | 1,075.27    | 63.25     |
| METHYLPHENIDATE (DL;D;L;ISOMERS) | 1724      | 31                           | 7,694.88    | 248.22    |
| CODEINE                          | 9050      | 40                           | 6,256.74    | 156.42    |
| BUPRENORPHINE                    | 9064      | 32                           | 936.83      | 29.28     |
| OXYCODONE                        | 9143      | 47                           | 11,948.96   | 254.23    |
| HYDROMORPHINE                    | 9150      | 40                           | 545.68      | 13.64     |
| HYDROCODONE                      | 9193      | 47                           | 4,108.74    | 87.42     |
| MEPERIDINE (PETHIDINE)           | 9230      | 26                           | 285.85      | 10.99     |
| METHADONE                        | 9250B     | 29                           | 1,062.73    | 36.65     |
| MORPHINE                         | 9300      | 49                           | 6,627.46    | 135.25    |
| OXYMORPHINE                      | 9652      | 1                            | 1.78        | 1.78      |
| TAPENTADOL                       | 9780      | 5                            | 472.00      | 94.40     |
| FENTANYL BASE                    | 9801      | 51                           | 126.46      | 2.48      |

**BUSINESS ACTIVITY: C - PRACTITIONERS**

| DRUG NAME              | DRUG CODE | NUMBER OF REGISTRANT SOLD TO | TOTAL GRAMS | AVG GRAMS |
|------------------------|-----------|------------------------------|-------------|-----------|
| CODEINE                | 9050      | 9                            | 71.32       | 7.92      |
| BUPRENORPHINE          | 9064      | 51                           | 4.73        | 0.09      |
| OXYCODONE              | 9143      | 7                            | 56.79       | 8.11      |
| HYDROMORPHINE          | 9150      | 44                           | 31.31       | 0.71      |
| HYDROCODONE            | 9193      | 40                           | 132.70      | 3.32      |
| MEPERIDINE (PETHIDINE) | 9230      | 15                           | 56.21       | 3.75      |

|               |       |    |       |      |
|---------------|-------|----|-------|------|
| METHADONE     | 9250B | 1  | 0.36  | 0.36 |
| MORPHINE      | 9300  | 44 | 47.40 | 1.08 |
| FENTANYL BASE | 9801  | 72 | 8.68  | 0.12 |

**BUSINESS ACTIVITY: M - MID-LEVEL PRACTITIONERS**

| DRUG NAME     | DRUG CODE | NUMBER OF REGISTRANT SOLD TO | TOTAL GRAMS | AVG GRAMS |
|---------------|-----------|------------------------------|-------------|-----------|
| CODEINE       | 9050      | 3                            | 13.26       | 4.42      |
| OXYCODONE     | 9143      | 1                            | 1.34        | 1.34      |
| HYDROCODONE   | 9193      | 6                            | 12.30       | 2.05      |
| MORPHINE      | 9300      | 4                            | 1.02        | 0.25      |
| FENTANYL BASE | 9801      | 5                            | 0.02        | 0.00      |

**BUSINESS ACTIVITY: NTP - NARCOTIC TREATMENT PROGRAMS**

| DRUG NAME     | DRUG CODE | NUMBER OF REGISTRANT SOLD TO | TOTAL GRAMS | AVG GRAMS |
|---------------|-----------|------------------------------|-------------|-----------|
| BUPRENORPHINE | 9064      | 2                            | 40.86       | 20.43     |
| METHADONE     | 9250B     | 4                            | 19,032.83   | 4,758.21  |

**STATE: AL - ALABAMA****BUSINESS ACTIVITY: A - PHARMACIES**

| DRUG NAME                        | DRUG CODE | NUMBER OF REGISTRANT SOLD TO | TOTAL GRAMS | AVG GRAMS |
|----------------------------------|-----------|------------------------------|-------------|-----------|
| AMPHETAMINE                      | 1100      | 1,345                        | 535,561.66  | 398.19    |
| METHAMPHETAMINE                  | 1105      | 33                           | 135.81      | 4.12      |
| LISDEXAMFETAMINE                 | 1205      | 1,317                        | 280,699.35  | 213.14    |
| METHYLPHENIDATE (DL;D;L;ISOMERS) | 1724      | 1,332                        | 273,932.72  | 205.66    |
| CODEINE                          | 9050      | 1,326                        | 195,634.76  | 147.54    |
| BUPRENORPHINE                    | 9064      | 1,273                        | 113,904.52  | 89.48     |
| OXYCODONE                        | 9143      | 1,352                        | 762,943.93  | 564.31    |
| HYDROMORPHONE                    | 9150      | 1,041                        | 8,368.91    | 8.04      |
| HYDROCODONE                      | 9193      | 1,368                        | 815,499.10  | 596.13    |
| MEPERIDINE (PETHIDINE)           | 9230      | 767                          | 13,421.54   | 17.50     |
| METHADONE                        | 9250B     | 1,105                        | 56,126.37   | 50.79     |
| MORPHINE                         | 9300      | 1,314                        | 219,148.35  | 166.78    |
| OXYMORPHONE                      | 9652      | 551                          | 8,425.80    | 15.29     |
| TAPENTADOL                       | 9780      | 1,030                        | 163,382.50  | 158.62    |
| FENTANYL BASE                    | 9801      | 1,279                        | 4,143.90    | 3.24      |

**BUSINESS ACTIVITY: B - HOSPITALS**

| DRUG NAME                        | DRUG CODE | NUMBER OF REGISTRANT SOLD TO | TOTAL GRAMS | AVG GRAMS |
|----------------------------------|-----------|------------------------------|-------------|-----------|
| AMPHETAMINE                      | 1100      | 72                           | 9,039.10    | 125.54    |
| LISDEXAMFETAMINE                 | 1205      | 29                           | 3,126.36    | 107.81    |
| METHYLPHENIDATE (DL;D;L;ISOMERS) | 1724      | 85                           | 7,151.88    | 84.14     |
| CODEINE                          | 9050      | 119                          | 4,432.93    | 37.25     |
| BUPRENORPHINE                    | 9064      | 104                          | 1,328.62    | 12.78     |
| OXYCODONE                        | 9143      | 148                          | 31,567.10   | 213.29    |

|                        |       |     |           |        |
|------------------------|-------|-----|-----------|--------|
| HYDROMORPHONE          | 9150  | 137 | 2,070.27  | 15.11  |
| HYDROCODONE            | 9193  | 150 | 37,594.01 | 250.63 |
| MEPERIDINE (PETHIDINE) | 9230  | 121 | 10,171.58 | 84.06  |
| METHADONE              | 9250B | 114 | 2,855.82  | 25.05  |
| MORPHINE               | 9300  | 148 | 20,769.91 | 140.34 |
| OXYMORPHONE            | 9652  | 6   | 25.42     | 4.24   |
| TAPENTADOL             | 9780  | 30  | 921.50    | 30.72  |
| FENTANYL BASE          | 9801  | 133 | 399.07    | 3.00   |

**BUSINESS ACTIVITY: C - PRACTITIONERS**

| DRUG NAME                        | DRUG CODE | NUMBER OF REGISTRANT SOLD TO | TOTAL GRAMS | AVG GRAMS |
|----------------------------------|-----------|------------------------------|-------------|-----------|
| AMPHETAMINE                      | 1100      | 1                            | 2.25        | 2.25      |
| LISDEXAMFETAMINE                 | 1205      | 1                            | 23.88       | 23.88     |
| METHYLPHENIDATE (DL;D;L;ISOMERS) | 1724      | 1                            | 20.49       | 20.49     |
| CODEINE                          | 9050      | 90                           | 1,535.19    | 17.06     |
| BUPRENORPHINE                    | 9064      | 303                          | 49.09       | 0.16      |
| OXYCODONE                        | 9143      | 34                           | 458.63      | 13.49     |
| HYDROMORPHONE                    | 9150      | 87                           | 101.61      | 1.17      |
| HYDROCODONE                      | 9193      | 136                          | 896.27      | 6.59      |
| MEPERIDINE (PETHIDINE)           | 9230      | 107                          | 1,632.21    | 15.25     |
| METHADONE                        | 9250B     | 1                            | 0.36        | 0.36      |
| MORPHINE                         | 9300      | 110                          | 398.31      | 3.62      |
| FENTANYL BASE                    | 9801      | 252                          | 29.95       | 0.12      |

**BUSINESS ACTIVITY: D - TEACHING INSTITUTIONS**

| DRUG NAME     | DRUG CODE | NUMBER OF REGISTRANT SOLD TO | TOTAL GRAMS | AVG GRAMS |
|---------------|-----------|------------------------------|-------------|-----------|
| BUPRENORPHINE | 9064      | 1                            | 0.02        | 0.02      |
| HYDROMORPHONE | 9150      | 1                            | 0.71        | 0.71      |
| HYDROCODONE   | 9193      | 1                            | 0.29        | 0.29      |
| FENTANYL BASE | 9801      | 1                            | 0.20        | 0.20      |

**BUSINESS ACTIVITY: M - MID-LEVEL PRACTITIONERS**

| DRUG NAME     | DRUG CODE | NUMBER OF REGISTRANT SOLD TO | TOTAL GRAMS | AVG GRAMS |
|---------------|-----------|------------------------------|-------------|-----------|
| CODEINE       | 9050      | 2                            | 2.17        | 1.08      |
| BUPRENORPHINE | 9064      | 1                            | 2.64        | 2.64      |

**BUSINESS ACTIVITY: NTP - NARCOTIC TREATMENT PROGRAMS**

| DRUG NAME     | DRUG CODE | NUMBER OF REGISTRANT SOLD TO | TOTAL GRAMS | AVG GRAMS |
|---------------|-----------|------------------------------|-------------|-----------|
| BUPRENORPHINE | 9064      | 10                           | 363.25      | 36.32     |
| METHADONE     | 9250B     | 26                           | 227,442.79  | 8,747.80  |

**STATE: AR - ARKANSAS****BUSINESS ACTIVITY: A - PHARMACIES**

| DRUG NAME   | DRUG CODE | NUMBER OF REGISTRANT SOLD TO | TOTAL GRAMS | AVG GRAMS |
|-------------|-----------|------------------------------|-------------|-----------|
| AMPHETAMINE | 1100      | 749                          | 205,172.85  | 273.93    |

|                                  |       |     |            |        |
|----------------------------------|-------|-----|------------|--------|
| METHAMPHETAMINE                  | 1105  | 13  | 28.13      | 2.16   |
| LISDEXAMFETAMINE                 | 1205  | 743 | 116,847.31 | 157.26 |
| METHYLPHENIDATE (DL;D;L;ISOMERS) | 1724  | 752 | 148,140.10 | 196.99 |
| CODEINE                          | 9050  | 756 | 237,197.64 | 313.75 |
| BUPRENORPHINE                    | 9064  | 703 | 27,928.74  | 39.73  |
| OXYCODONE                        | 9143  | 761 | 439,716.52 | 577.81 |
| HYDROMORPHONE                    | 9150  | 709 | 8,329.52   | 11.75  |
| HYDROCODONE                      | 9193  | 763 | 436,803.17 | 572.48 |
| MEPERIDINE (PETHIDINE)           | 9230  | 607 | 16,907.75  | 27.85  |
| METHADONE                        | 9250B | 667 | 22,498.01  | 33.73  |
| MORPHINE                         | 9300  | 758 | 128,188.55 | 169.11 |
| OXYMORPHONE                      | 9652  | 245 | 2,011.91   | 8.21   |
| TAPENTADOL                       | 9780  | 542 | 53,559.50  | 98.82  |
| FENTANYL BASE                    | 9801  | 736 | 2,312.70   | 3.14   |

**BUSINESS ACTIVITY: B - HOSPITALS**

| DRUG NAME                        | DRUG CODE | NUMBER OF REGISTRANT SOLD TO | TOTAL GRAMS | AVG GRAMS |
|----------------------------------|-----------|------------------------------|-------------|-----------|
| AMPHETAMINE                      | 1100      | 47                           | 4,096.50    | 87.16     |
| LISDEXAMFETAMINE                 | 1205      | 25                           | 1,058.50    | 42.34     |
| METHYLPHENIDATE (DL;D;L;ISOMERS) | 1724      | 74                           | 4,032.02    | 54.49     |
| CODEINE                          | 9050      | 89                           | 4,039.28    | 45.39     |
| BUPRENORPHINE                    | 9064      | 47                           | 1,122.05    | 23.87     |
| OXYCODONE                        | 9143      | 124                          | 19,178.89   | 154.67    |
| HYDROMORPHONE                    | 9150      | 108                          | 1,644.70    | 15.23     |
| HYDROCODONE                      | 9193      | 124                          | 18,138.55   | 146.28    |
| MEPERIDINE (PETHIDINE)           | 9230      | 99                           | 5,184.92    | 52.37     |
| METHADONE                        | 9250B     | 89                           | 1,935.21    | 21.74     |
| MORPHINE                         | 9300      | 124                          | 11,560.21   | 93.23     |
| OXYMORPHONE                      | 9652      | 5                            | 29.44       | 5.89      |
| TAPENTADOL                       | 9780      | 21                           | 1,197.50    | 57.02     |
| FENTANYL BASE                    | 9801      | 123                          | 315.60      | 2.57      |

**BUSINESS ACTIVITY: C - PRACTITIONERS**

| DRUG NAME                        | DRUG CODE | NUMBER OF REGISTRANT SOLD TO | TOTAL GRAMS | AVG GRAMS |
|----------------------------------|-----------|------------------------------|-------------|-----------|
| AMPHETAMINE                      | 1100      | 1                            | 3.27        | 3.27      |
| LISDEXAMFETAMINE                 | 1205      | 1                            | 47.23       | 47.23     |
| METHYLPHENIDATE (DL;D;L;ISOMERS) | 1724      | 1                            | 48.77       | 48.77     |
| CODEINE                          | 9050      | 25                           | 510.01      | 20.40     |
| BUPRENORPHINE                    | 9064      | 163                          | 11.22       | 0.07      |
| OXYCODONE                        | 9143      | 8                            | 28.24       | 3.53      |
| HYDROMORPHONE                    | 9150      | 55                           | 23.28       | 0.42      |
| HYDROCODONE                      | 9193      | 83                           | 184.34      | 2.22      |



|                        |       |     |        |       |
|------------------------|-------|-----|--------|-------|
| MEPERIDINE (PETHIDINE) | 9230  | 35  | 552.10 | 15.77 |
| METHADONE              | 9250B | 1   | 3.85   | 3.85  |
| MORPHINE               | 9300  | 76  | 67.55  | 0.89  |
| FENTANYL BASE          | 9801  | 152 | 12.88  | 0.08  |

**BUSINESS ACTIVITY: D - TEACHING INSTITUTIONS**

| DRUG NAME     | DRUG CODE | NUMBER OF REGISTRANT SOLD TO | TOTAL GRAMS | AVG GRAMS |
|---------------|-----------|------------------------------|-------------|-----------|
| BUPRENORPHINE | 9064      | 1                            | 0.00        | 0.00      |

**BUSINESS ACTIVITY: M - MID-LEVEL PRACTITIONERS**

| DRUG NAME | DRUG CODE | NUMBER OF REGISTRANT SOLD TO | TOTAL GRAMS | AVG GRAMS |
|-----------|-----------|------------------------------|-------------|-----------|
| CODEINE   | 9050      | 1                            | 0.87        | 0.87      |

**BUSINESS ACTIVITY: NTP - NARCOTIC TREATMENT PROGRAMS**

| DRUG NAME     | DRUG CODE | NUMBER OF REGISTRANT SOLD TO | TOTAL GRAMS | AVG GRAMS |
|---------------|-----------|------------------------------|-------------|-----------|
| BUPRENORPHINE | 9064      | 1                            | 12.24       | 12.24     |
| METHADONE     | 9250B     | 6                            | 29,250.46   | 4,875.08  |

**STATE: AS - AMERICAN SAMOA****BUSINESS ACTIVITY: B - HOSPITALS**

| DRUG NAME                        | DRUG CODE | NUMBER OF REGISTRANT SOLD TO | TOTAL GRAMS | AVG GRAMS |
|----------------------------------|-----------|------------------------------|-------------|-----------|
| AMPHETAMINE                      | 1100      | 1                            | 2.50        | 2.50      |
| METHYLPHENIDATE (DL;D;L;ISOMERS) | 1724      | 1                            | 44.10       | 44.10     |
| CODEINE                          | 9050      | 1                            | 1,060.85    | 1,060.85  |
| OXYCODONE                        | 9143      | 1                            | 36.76       | 36.76     |
| HYDROMORPHONE                    | 9150      | 1                            | 1.20        | 1.20      |
| HYDROCODONE                      | 9193      | 1                            | 3.63        | 3.63      |
| MORPHINE                         | 9300      | 1                            | 48.58       | 48.58     |
| FENTANYL BASE                    | 9801      | 1                            | 0.37        | 0.37      |

**BUSINESS ACTIVITY: C - PRACTITIONERS**

| DRUG NAME     | DRUG CODE | NUMBER OF REGISTRANT SOLD TO | TOTAL GRAMS | AVG GRAMS |
|---------------|-----------|------------------------------|-------------|-----------|
| BUPRENORPHINE | 9064      | 1                            | 0.04        | 0.04      |

**STATE: AZ - ARIZONA****BUSINESS ACTIVITY: A - PHARMACIES**

| DRUG NAME                        | DRUG CODE | NUMBER OF REGISTRANT SOLD TO | TOTAL GRAMS  | AVG GRAMS |
|----------------------------------|-----------|------------------------------|--------------|-----------|
| AMPHETAMINE                      | 1100      | 1,090                        | 368,078.69   | 337.69    |
| METHAMPHETAMINE                  | 1105      | 32                           | 180.01       | 5.63      |
| LISDEXAMFETAMINE                 | 1205      | 1,025                        | 167,313.70   | 163.23    |
| METHYLPHENIDATE (DL;D;L;ISOMERS) | 1724      | 1,094                        | 316,426.47   | 289.24    |
| CODEINE                          | 9050      | 1,104                        | 219,297.31   | 198.64    |
| BUPRENORPHINE                    | 9064      | 1,067                        | 40,934.18    | 38.36     |
| OXYCODONE                        | 9143      | 1,114                        | 1,325,818.08 | 1,190.14  |
| HYDROMORPHONE                    | 9150      | 1,012                        | 19,539.73    | 19.31     |
| HYDROCODONE                      | 9193      | 1,114                        | 331,368.84   | 297.46    |

|                        |       |       |            |        |
|------------------------|-------|-------|------------|--------|
| MEPERIDINE (PETHIDINE) | 9230  | 487   | 10,518.46  | 21.60  |
| METHADONE              | 9250B | 909   | 36,901.78  | 40.60  |
| MORPHINE               | 9300  | 1,102 | 446,500.14 | 405.17 |
| OXYMORPHONE            | 9652  | 536   | 8,696.15   | 16.22  |
| TAPENTADOL             | 9780  | 768   | 116,667.00 | 151.91 |
| FENTANYL BASE          | 9801  | 1,019 | 4,479.19   | 4.40   |

**BUSINESS ACTIVITY: B - HOSPITALS**

| DRUG NAME                        | DRUG CODE | NUMBER OF REGISTRANT SOLD TO | TOTAL GRAMS | AVG GRAMS |
|----------------------------------|-----------|------------------------------|-------------|-----------|
| AMPHETAMINE                      | 1100      | 95                           | 8,297.02    | 87.34     |
| LISDEXAMFETAMINE                 | 1205      | 43                           | 1,712.91    | 39.84     |
| METHYLPHENIDATE (DL;D;L;ISOMERS) | 1724      | 111                          | 14,592.93   | 131.47    |
| CODEINE                          | 9050      | 126                          | 15,054.29   | 119.48    |
| BUPRENORPHINE                    | 9064      | 76                           | 3,143.45    | 41.36     |
| OXYCODONE                        | 9143      | 157                          | 56,284.54   | 358.50    |
| HYDROMORPHONE                    | 9150      | 123                          | 2,410.56    | 19.60     |
| HYDROCODONE                      | 9193      | 150                          | 16,314.99   | 108.77    |
| MEPERIDINE (PETHIDINE)           | 9230      | 87                           | 4,336.80    | 49.85     |
| METHADONE                        | 9250B     | 110                          | 3,862.76    | 35.12     |
| MORPHINE                         | 9300      | 153                          | 40,407.75   | 264.10    |
| OXYMORPHONE                      | 9652      | 8                            | 21.41       | 2.68      |
| TAPENTADOL                       | 9780      | 10                           | 597.50      | 59.75     |
| FENTANYL BASE                    | 9801      | 130                          | 491.53      | 3.78      |

**BUSINESS ACTIVITY: C - PRACTITIONERS**

| DRUG NAME              | DRUG CODE | NUMBER OF REGISTRANT SOLD TO | TOTAL GRAMS | AVG GRAMS |
|------------------------|-----------|------------------------------|-------------|-----------|
| CODEINE                | 9050      | 105                          | 2,734.13    | 26.04     |
| BUPRENORPHINE          | 9064      | 660                          | 84.32       | 0.13      |
| OXYCODONE              | 9143      | 109                          | 254.79      | 2.34      |
| HYDROMORPHONE          | 9150      | 360                          | 268.71      | 0.75      |
| HYDROCODONE            | 9193      | 326                          | 1,025.04    | 3.14      |
| MEPERIDINE (PETHIDINE) | 9230      | 262                          | 3,507.72    | 13.39     |
| METHADONE              | 9250B     | 22                           | 135.14      | 6.14      |
| MORPHINE               | 9300      | 334                          | 394.09      | 1.18      |
| OXYMORPHONE            | 9652      | 1                            | 0.25        | 0.25      |
| FENTANYL BASE          | 9801      | 740                          | 54.89       | 0.07      |

**BUSINESS ACTIVITY: M - MID-LEVEL PRACTITIONERS**

| DRUG NAME     | DRUG CODE | NUMBER OF REGISTRANT SOLD TO | TOTAL GRAMS | AVG GRAMS |
|---------------|-----------|------------------------------|-------------|-----------|
| CODEINE       | 9050      | 25                           | 196.74      | 7.87      |
| BUPRENORPHINE | 9064      | 3                            | 8.16        | 2.72      |
| OXYCODONE     | 9143      | 1                            | 0.45        | 0.45      |
| HYDROMORPHONE | 9150      | 1                            | 0.02        | 0.02      |

|               |      |   |      |      |
|---------------|------|---|------|------|
| HYDROCODONE   | 9193 | 1 | 0.88 | 0.88 |
| MORPHINE      | 9300 | 1 | 0.19 | 0.19 |
| FENTANYL BASE | 9801 | 2 | 0.01 | 0.00 |

**BUSINESS ACTIVITY: NTP - NARCOTIC TREATMENT PROGRAMS**

| DRUG NAME     | DRUG CODE | NUMBER OF REGISTRANT SOLD TO | TOTAL GRAMS | AVG GRAMS |
|---------------|-----------|------------------------------|-------------|-----------|
| BUPRENORPHINE | 9064      | 17                           | 876.61      | 51.57     |
| METHADONE     | 9250B     | 48                           | 312,091.49  | 6,501.91  |

**STATE: CA - CALIFORNIA****BUSINESS ACTIVITY: A - PHARMACIES**

| DRUG NAME                        | DRUG CODE | NUMBER OF REGISTRANT SOLD TO | TOTAL GRAMS  | AVG GRAMS |
|----------------------------------|-----------|------------------------------|--------------|-----------|
| AMPHETAMINE                      | 1100      | 5,469                        | 1,182,729.85 | 216.26    |
| METHAMPHETAMINE                  | 1105      | 269                          | 1,059.86     | 3.94      |
| LISDEXAMFETAMINE                 | 1205      | 4,817                        | 444,384.31   | 92.25     |
| METHYLPHENIDATE (DL;D;L;ISOMERS) | 1724      | 5,360                        | 998,655.09   | 186.32    |
| CODEINE                          | 9050      | 6,121                        | 1,516,865.84 | 247.81    |
| BUPRENORPHINE                    | 9064      | 5,174                        | 163,041.89   | 31.51     |
| OXYCODONE                        | 9143      | 5,782                        | 2,737,503.11 | 473.45    |
| HYDROMORPHONE                    | 9150      | 5,014                        | 103,481.09   | 20.64     |
| HYDROCODONE                      | 9193      | 6,055                        | 2,965,542.79 | 489.77    |
| MEPERIDINE (PETHIDINE)           | 9230      | 761                          | 21,674.21    | 28.48     |
| METHADONE                        | 9250B     | 4,550                        | 269,052.25   | 59.13     |
| MORPHINE                         | 9300      | 5,415                        | 1,336,574.16 | 246.83    |
| OXYMORPHONE                      | 9652      | 1,207                        | 22,898.29    | 18.97     |
| TAPENTADOL                       | 9780      | 2,902                        | 321,217.50   | 110.69    |
| FENTANYL BASE                    | 9801      | 4,842                        | 18,484.00    | 3.82      |

**BUSINESS ACTIVITY: B - HOSPITALS**

| DRUG NAME                        | DRUG CODE | NUMBER OF REGISTRANT SOLD TO | TOTAL GRAMS | AVG GRAMS |
|----------------------------------|-----------|------------------------------|-------------|-----------|
| AMPHETAMINE                      | 1100      | 254                          | 44,561.59   | 175.44    |
| METHAMPHETAMINE                  | 1105      | 2                            | 20.09       | 10.04     |
| LISDEXAMFETAMINE                 | 1205      | 93                           | 7,772.55    | 83.58     |
| METHYLPHENIDATE (DL;D;L;ISOMERS) | 1724      | 402                          | 43,561.96   | 108.36    |
| CODEINE                          | 9050      | 567                          | 66,045.99   | 116.48    |
| BUPRENORPHINE                    | 9064      | 372                          | 6,471.77    | 17.40     |
| OXYCODONE                        | 9143      | 649                          | 146,121.10  | 225.15    |
| HYDROMORPHONE                    | 9150      | 664                          | 21,144.53   | 31.84     |
| HYDROCODONE                      | 9193      | 735                          | 157,416.36  | 214.17    |
| MEPERIDINE (PETHIDINE)           | 9230      | 597                          | 30,231.14   | 50.64     |
| METHADONE                        | 9250B     | 527                          | 38,549.59   | 73.15     |
| MORPHINE                         | 9300      | 764                          | 142,105.66  | 186.00    |
| OXYMORPHONE                      | 9652      | 29                           | 158.26      | 5.46      |

|               |      |     |          |       |
|---------------|------|-----|----------|-------|
| TAPENTADOL    | 9780 | 66  | 2,501.73 | 37.90 |
| FENTANYL BASE | 9801 | 839 | 2,536.90 | 3.02  |

**BUSINESS ACTIVITY: C - PRACTITIONERS**

| DRUG NAME                        | DRUG CODE | NUMBER OF REGISTRANT SOLD TO | TOTAL GRAMS | AVG GRAMS |
|----------------------------------|-----------|------------------------------|-------------|-----------|
| AMPHETAMINE                      | 1100      | 16                           | 911.30      | 56.96     |
| LISDEXAMFETAMINE                 | 1205      | 7                            | 98.70       | 14.10     |
| METHYLPHENIDATE (DL;D;L;ISOMERS) | 1724      | 3                            | 78.52       | 26.17     |
| CODEINE                          | 9050      | 698                          | 21,685.14   | 31.07     |
| BUPRENORPHINE                    | 9064      | 3,047                        | 1,108.07    | 0.36      |
| OXYCODONE                        | 9143      | 223                          | 616.87      | 2.77      |
| HYDROMORPHONE                    | 9150      | 1,509                        | 1,304.96    | 0.86      |
| HYDROCODONE                      | 9193      | 2,084                        | 10,911.64   | 5.24      |
| MEPERIDINE (PETHIDINE)           | 9230      | 787                          | 10,135.11   | 12.88     |
| METHADONE                        | 9250B     | 152                          | 304.81      | 2.01      |
| MORPHINE                         | 9300      | 979                          | 1,343.15    | 1.37      |
| FENTANYL BASE                    | 9801      | 2,567                        | 544.94      | 0.21      |

**BUSINESS ACTIVITY: D - TEACHING INSTITUTIONS**

| DRUG NAME     | DRUG CODE | NUMBER OF REGISTRANT SOLD TO | TOTAL GRAMS | AVG GRAMS |
|---------------|-----------|------------------------------|-------------|-----------|
| BUPRENORPHINE | 9064      | 6                            | 0.29        | 0.05      |
| HYDROMORPHONE | 9150      | 3                            | 0.43        | 0.14      |

**BUSINESS ACTIVITY: M - MID-LEVEL PRACTITIONERS**

| DRUG NAME     | DRUG CODE | NUMBER OF REGISTRANT SOLD TO | TOTAL GRAMS | AVG GRAMS |
|---------------|-----------|------------------------------|-------------|-----------|
| CODEINE       | 9050      | 49                           | 560.52      | 11.44     |
| BUPRENORPHINE | 9064      | 4                            | 2.51        | 0.63      |

**BUSINESS ACTIVITY: NTP - NARCOTIC TREATMENT PROGRAMS**

| DRUG NAME     | DRUG CODE | NUMBER OF REGISTRANT SOLD TO | TOTAL GRAMS | AVG GRAMS |
|---------------|-----------|------------------------------|-------------|-----------|
| BUPRENORPHINE | 9064      | 92                           | 1,375.44    | 14.95     |
| METHADONE     | 9250B     | 151                          | 901,949.63  | 5,973.18  |

**STATE: CO - COLORADO****BUSINESS ACTIVITY: A - PHARMACIES**

| DRUG NAME                        | DRUG CODE | NUMBER OF REGISTRANT SOLD TO | TOTAL GRAMS | AVG GRAMS |
|----------------------------------|-----------|------------------------------|-------------|-----------|
| AMPHETAMINE                      | 1100      | 795                          | 297,114.98  | 373.73    |
| METHAMPHETAMINE                  | 1105      | 81                           | 214.98      | 2.65      |
| LISDEXAMFETAMINE                 | 1205      | 760                          | 109,131.98  | 143.59    |
| METHYLPHENIDATE (DL;D;L;ISOMERS) | 1724      | 792                          | 202,215.90  | 255.32    |
| CODEINE                          | 9050      | 788                          | 70,978.48   | 90.07     |
| BUPRENORPHINE                    | 9064      | 777                          | 30,271.97   | 38.96     |
| OXYCODONE                        | 9143      | 802                          | 650,037.29  | 810.52    |
| HYDROMORPHONE                    | 9150      | 785                          | 17,980.93   | 22.91     |
| HYDROCODONE                      | 9193      | 805                          | 185,358.58  | 230.26    |

|                        |       |     |            |        |
|------------------------|-------|-----|------------|--------|
| MEPERIDINE (PETHIDINE) | 9230  | 209 | 4,238.76   | 20.28  |
| METHADONE              | 9250B | 663 | 24,732.57  | 37.30  |
| MORPHINE               | 9300  | 799 | 204,367.81 | 255.78 |
| OXYMORPHONE            | 9652  | 381 | 5,363.26   | 14.08  |
| TAPENTADOL             | 9780  | 626 | 96,773.00  | 154.59 |
| FENTANYL BASE          | 9801  | 760 | 3,069.42   | 4.04   |

**BUSINESS ACTIVITY: B - HOSPITALS**

| DRUG NAME                        | DRUG CODE | NUMBER OF REGISTRANT SOLD TO | TOTAL GRAMS | AVG GRAMS |
|----------------------------------|-----------|------------------------------|-------------|-----------|
| AMPHETAMINE                      | 1100      | 122                          | 47,835.16   | 392.09    |
| METHAMPHETAMINE                  | 1105      | 6                            | 20.49       | 3.42      |
| LISDEXAMFETAMINE                 | 1205      | 74                           | 7,371.93    | 99.62     |
| METHYLPHENIDATE (DL;D;L;ISOMERS) | 1724      | 134                          | 42,777.08   | 319.23    |
| CODEINE                          | 9050      | 153                          | 12,893.25   | 84.27     |
| BUPRENORPHINE                    | 9064      | 117                          | 4,116.08    | 35.18     |
| OXYCODONE                        | 9143      | 211                          | 109,030.95  | 516.73    |
| HYDROMORPHONE                    | 9150      | 201                          | 5,232.09    | 26.03     |
| HYDROCODONE                      | 9193      | 224                          | 31,360.24   | 140.00    |
| MEPERIDINE (PETHIDINE)           | 9230      | 94                           | 1,181.65    | 12.57     |
| METHADONE                        | 9250B     | 135                          | 7,027.03    | 52.05     |
| MORPHINE                         | 9300      | 211                          | 50,388.25   | 238.81    |
| OXYMORPHONE                      | 9652      | 31                           | 234.62      | 7.57      |
| TAPENTADOL                       | 9780      | 60                           | 4,461.50    | 74.36     |
| FENTANYL BASE                    | 9801      | 212                          | 744.03      | 3.51      |

**BUSINESS ACTIVITY: C - PRACTITIONERS**

| DRUG NAME                        | DRUG CODE | NUMBER OF REGISTRANT SOLD TO | TOTAL GRAMS | AVG GRAMS |
|----------------------------------|-----------|------------------------------|-------------|-----------|
| AMPHETAMINE                      | 1100      | 1                            | 1.25        | 1.25      |
| METHYLPHENIDATE (DL;D;L;ISOMERS) | 1724      | 1                            | 31.65       | 31.65     |
| CODEINE                          | 9050      | 58                           | 849.51      | 14.65     |
| BUPRENORPHINE                    | 9064      | 797                          | 188.56      | 0.24      |
| OXYCODONE                        | 9143      | 116                          | 647.57      | 5.58      |
| HYDROMORPHONE                    | 9150      | 493                          | 364.72      | 0.74      |
| HYDROCODONE                      | 9193      | 339                          | 930.68      | 2.75      |
| MEPERIDINE (PETHIDINE)           | 9230      | 92                           | 269.51      | 2.93      |
| METHADONE                        | 9250B     | 36                           | 54.56       | 1.52      |
| MORPHINE                         | 9300      | 315                          | 433.41      | 1.38      |
| FENTANYL BASE                    | 9801      | 591                          | 70.89       | 0.12      |

**BUSINESS ACTIVITY: M - MID-LEVEL PRACTITIONERS**

| DRUG NAME     | DRUG CODE | NUMBER OF REGISTRANT SOLD TO | TOTAL GRAMS | AVG GRAMS |
|---------------|-----------|------------------------------|-------------|-----------|
| CODEINE       | 9050      | 13                           | 10.83       | 0.83      |
| BUPRENORPHINE | 9064      | 2                            | 1.66        | 0.83      |

|               |      |    |       |      |
|---------------|------|----|-------|------|
| OXYCODONE     | 9143 | 1  | 1.79  | 1.79 |
| HYDROMORPHONE | 9150 | 6  | 0.34  | 0.06 |
| HYDROCODONE   | 9193 | 1  | 0.61  | 0.61 |
| MORPHINE      | 9300 | 27 | 13.19 | 0.49 |
| FENTANYL BASE | 9801 | 49 | 1.64  | 0.03 |

**BUSINESS ACTIVITY: NTP - NARCOTIC TREATMENT PROGRAMS**

| DRUG NAME     | DRUG CODE | NUMBER OF REGISTRANT SOLD TO | TOTAL GRAMS | AVG GRAMS |
|---------------|-----------|------------------------------|-------------|-----------|
| BUPRENORPHINE | 9064      | 17                           | 624.99      | 36.76     |
| METHADONE     | 9250B     | 24                           | 148,219.97  | 6,175.83  |

**STATE: CT - CONNECTICUT****BUSINESS ACTIVITY: A - PHARMACIES**

| DRUG NAME                        | DRUG CODE | NUMBER OF REGISTRANT SOLD TO | TOTAL GRAMS | AVG GRAMS |
|----------------------------------|-----------|------------------------------|-------------|-----------|
| AMPHETAMINE                      | 1100      | 700                          | 222,506.94  | 317.87    |
| METHAMPHETAMINE                  | 1105      | 29                           | 83.58       | 2.88      |
| LISDEXAMFETAMINE                 | 1205      | 689                          | 143,049.69  | 207.62    |
| METHYLPHENIDATE (DL;D;L;ISOMERS) | 1724      | 701                          | 213,683.13  | 304.83    |
| CODEINE                          | 9050      | 696                          | 76,056.84   | 109.28    |
| BUPRENORPHINE                    | 9064      | 694                          | 62,488.09   | 90.04     |
| OXYCODONE                        | 9143      | 705                          | 550,665.71  | 781.09    |
| HYDROMORPHONE                    | 9150      | 681                          | 17,245.39   | 25.32     |
| HYDROCODONE                      | 9193      | 701                          | 65,368.17   | 93.25     |
| MEPERIDINE (PETHIDINE)           | 9230      | 111                          | 3,160.82    | 28.48     |
| METHADONE                        | 9250B     | 528                          | 18,637.24   | 35.30     |
| MORPHINE                         | 9300      | 675                          | 112,246.76  | 166.29    |
| OXYMORPHONE                      | 9652      | 286                          | 5,355.37    | 18.73     |
| TAPENTADOL                       | 9780      | 408                          | 33,659.00   | 82.50     |
| FENTANYL BASE                    | 9801      | 643                          | 2,626.65    | 4.08      |

**BUSINESS ACTIVITY: B - HOSPITALS**

| DRUG NAME                        | DRUG CODE | NUMBER OF REGISTRANT SOLD TO | TOTAL GRAMS | AVG GRAMS |
|----------------------------------|-----------|------------------------------|-------------|-----------|
| AMPHETAMINE                      | 1100      | 39                           | 4,707.26    | 120.70    |
| METHAMPHETAMINE                  | 1105      | 1                            | 12.45       | 12.45     |
| LISDEXAMFETAMINE                 | 1205      | 21                           | 1,753.38    | 83.49     |
| METHYLPHENIDATE (DL;D;L;ISOMERS) | 1724      | 53                           | 4,436.98    | 83.72     |
| CODEINE                          | 9050      | 60                           | 2,217.40    | 36.96     |
| BUPRENORPHINE                    | 9064      | 62                           | 2,495.09    | 40.24     |
| OXYCODONE                        | 9143      | 74                           | 17,567.10   | 237.39    |
| HYDROMORPHONE                    | 9150      | 63                           | 2,974.48    | 47.21     |
| HYDROCODONE                      | 9193      | 56                           | 1,706.00    | 30.46     |
| MEPERIDINE (PETHIDINE)           | 9230      | 41                           | 348.82      | 8.51      |
| METHADONE                        | 9250B     | 51                           | 3,901.91    | 76.51     |

|               |      |    |           |        |
|---------------|------|----|-----------|--------|
| MORPHINE      | 9300 | 64 | 10,626.32 | 166.04 |
| OXYMORPHONE   | 9652 | 5  | 18.42     | 3.68   |
| TAPENTADOL    | 9780 | 6  | 478.50    | 79.75  |
| FENTANYL BASE | 9801 | 67 | 271.62    | 4.05   |

**BUSINESS ACTIVITY: C - PRACTITIONERS**

| DRUG NAME              | DRUG CODE | NUMBER OF REGISTRANT SOLD TO | TOTAL GRAMS | AVG GRAMS |
|------------------------|-----------|------------------------------|-------------|-----------|
| AMPHETAMINE            | 1100      | 1                            | 3.17        | 3.17      |
| CODEINE                | 9050      | 45                           | 203.82      | 4.53      |
| BUPRENORPHINE          | 9064      | 344                          | 25.76       | 0.07      |
| OXYCODONE              | 9143      | 52                           | 711.87      | 13.69     |
| HYDROMORPHONE          | 9150      | 168                          | 135.60      | 0.81      |
| HYDROCODONE            | 9193      | 101                          | 369.87      | 3.66      |
| MEPERIDINE (PETHIDINE) | 9230      | 25                           | 185.19      | 7.41      |
| METHADONE              | 9250B     | 19                           | 87.29       | 4.59      |
| MORPHINE               | 9300      | 118                          | 257.79      | 2.18      |
| FENTANYL BASE          | 9801      | 235                          | 31.78       | 0.14      |

**BUSINESS ACTIVITY: M - MID-LEVEL PRACTITIONERS**

| DRUG NAME     | DRUG CODE | NUMBER OF REGISTRANT SOLD TO | TOTAL GRAMS | AVG GRAMS |
|---------------|-----------|------------------------------|-------------|-----------|
| CODEINE       | 9050      | 4                            | 2.17        | 0.54      |
| FENTANYL BASE | 9801      | 1                            | 0.08        | 0.08      |

**BUSINESS ACTIVITY: NTP - NARCOTIC TREATMENT PROGRAMS**

| DRUG NAME     | DRUG CODE | NUMBER OF REGISTRANT SOLD TO | TOTAL GRAMS | AVG GRAMS |
|---------------|-----------|------------------------------|-------------|-----------|
| BUPRENORPHINE | 9064      | 4                            | 79.22       | 19.81     |
| METHADONE     | 9250B     | 42                           | 394,317.71  | 9,388.52  |

**STATE: DC - DISTRICT OF COLUMBIA****BUSINESS ACTIVITY: A - PHARMACIES**

| DRUG NAME                        | DRUG CODE | NUMBER OF REGISTRANT SOLD TO | TOTAL GRAMS | AVG GRAMS |
|----------------------------------|-----------|------------------------------|-------------|-----------|
| AMPHETAMINE                      | 1100      | 148                          | 46,912.83   | 316.98    |
| METHAMPHETAMINE                  | 1105      | 8                            | 29.73       | 3.72      |
| LISDEXAMFETAMINE                 | 1205      | 138                          | 22,359.75   | 162.03    |
| METHYLPHENIDATE (DL;D;L;ISOMERS) | 1724      | 147                          | 28,800.05   | 195.92    |
| CODEINE                          | 9050      | 157                          | 39,752.03   | 253.20    |
| BUPRENORPHINE                    | 9064      | 134                          | 11,335.96   | 84.60     |
| OXYCODONE                        | 9143      | 153                          | 41,509.65   | 271.30    |
| HYDROMORPHONE                    | 9150      | 114                          | 859.76      | 7.54      |
| HYDROCODONE                      | 9193      | 149                          | 4,178.26    | 28.04     |
| MEPERIDINE (PETHIDINE)           | 9230      | 15                           | 295.77      | 19.72     |
| METHADONE                        | 9250B     | 47                           | 1,015.14    | 21.60     |
| MORPHINE                         | 9300      | 111                          | 7,383.42    | 66.52     |
| OXYMORPHONE                      | 9652      | 25                           | 258.31      | 10.33     |

|               |      |    |          |       |
|---------------|------|----|----------|-------|
| TAPENTADOL    | 9780 | 48 | 3,055.00 | 63.65 |
| FENTANYL BASE | 9801 | 96 | 151.49   | 1.58  |

**BUSINESS ACTIVITY: B - HOSPITALS**

| DRUG NAME                        | DRUG CODE | NUMBER OF REGISTRANT SOLD TO | TOTAL GRAMS | AVG GRAMS |
|----------------------------------|-----------|------------------------------|-------------|-----------|
| AMPHETAMINE                      | 1100      | 9                            | 2,613.31    | 290.37    |
| LISDEXAMFETAMINE                 | 1205      | 5                            | 248.58      | 49.72     |
| METHYLPHENIDATE (DL;D;L;ISOMERS) | 1724      | 15                           | 2,829.78    | 188.65    |
| CODEINE                          | 9050      | 15                           | 1,675.62    | 111.71    |
| BUPRENORPHINE                    | 9064      | 22                           | 248.75      | 11.31     |
| OXYCODONE                        | 9143      | 22                           | 8,110.06    | 368.64    |
| HYDROMORPHONE                    | 9150      | 25                           | 831.54      | 33.26     |
| HYDROCODONE                      | 9193      | 18                           | 406.61      | 22.59     |
| MEPERIDINE (PETHIDINE)           | 9230      | 11                           | 319.19      | 29.02     |
| METHADONE                        | 9250B     | 14                           | 785.15      | 56.08     |
| MORPHINE                         | 9300      | 22                           | 4,489.82    | 204.08    |
| OXYMORPHONE                      | 9652      | 1                            | 3.57        | 3.57      |
| TAPENTADOL                       | 9780      | 3                            | 311.00      | 103.67    |
| FENTANYL BASE                    | 9801      | 22                           | 135.33      | 6.15      |

**BUSINESS ACTIVITY: C - PRACTITIONERS**

| DRUG NAME                        | DRUG CODE | NUMBER OF REGISTRANT SOLD TO | TOTAL GRAMS | AVG GRAMS |
|----------------------------------|-----------|------------------------------|-------------|-----------|
| AMPHETAMINE                      | 1100      | 1                            | 2.50        | 2.50      |
| METHYLPHENIDATE (DL;D;L;ISOMERS) | 1724      | 1                            | 11.50       | 11.50     |
| CODEINE                          | 9050      | 8                            | 32.06       | 4.01      |
| BUPRENORPHINE                    | 9064      | 16                           | 1.60        | 0.10      |
| OXYCODONE                        | 9143      | 6                            | 11.65       | 1.94      |
| HYDROMORPHONE                    | 9150      | 3                            | 2.32        | 0.77      |
| HYDROCODONE                      | 9193      | 7                            | 17.10       | 2.44      |
| MEPERIDINE (PETHIDINE)           | 9230      | 3                            | 20.70       | 6.90      |
| MORPHINE                         | 9300      | 6                            | 2.47        | 0.41      |
| FENTANYL BASE                    | 9801      | 11                           | 0.49        | 0.04      |

**BUSINESS ACTIVITY: D - TEACHING INSTITUTIONS**

| DRUG NAME     | DRUG CODE | NUMBER OF REGISTRANT SOLD TO | TOTAL GRAMS | AVG GRAMS |
|---------------|-----------|------------------------------|-------------|-----------|
| BUPRENORPHINE | 9064      | 1                            | 0.00        | 0.00      |

**BUSINESS ACTIVITY: M - MID-LEVEL PRACTITIONERS**

| DRUG NAME     | DRUG CODE | NUMBER OF REGISTRANT SOLD TO | TOTAL GRAMS | AVG GRAMS |
|---------------|-----------|------------------------------|-------------|-----------|
| CODEINE       | 9050      | 1                            | 2.21        | 2.21      |
| FENTANYL BASE | 9801      | 1                            | 0.03        | 0.03      |

**BUSINESS ACTIVITY: NTP - NARCOTIC TREATMENT PROGRAMS**

| DRUG NAME     | DRUG CODE | NUMBER OF REGISTRANT SOLD TO | TOTAL GRAMS | AVG GRAMS |
|---------------|-----------|------------------------------|-------------|-----------|
| BUPRENORPHINE | 9064      | 1                            | 3.00        | 3.00      |



|           |       |   |           |          |
|-----------|-------|---|-----------|----------|
| METHADONE | 9250B | 5 | 33,611.55 | 6,722.31 |
|-----------|-------|---|-----------|----------|

**STATE: DE - DELAWARE****BUSINESS ACTIVITY: A - PHARMACIES**

| DRUG NAME                        | DRUG CODE | NUMBER OF REGISTRANT SOLD TO | TOTAL GRAMS | AVG GRAMS |
|----------------------------------|-----------|------------------------------|-------------|-----------|
| AMPHETAMINE                      | 1100      | 207                          | 82,997.66   | 400.95    |
| METHAMPHETAMINE                  | 1105      | 4                            | 17.68       | 4.42      |
| LISDEXAMFETAMINE                 | 1205      | 202                          | 55,192.36   | 273.23    |
| METHYLPHENIDATE (DL;D;L;ISOMERS) | 1724      | 205                          | 68,692.65   | 335.09    |
| CODEINE                          | 9050      | 203                          | 29,994.02   | 147.75    |
| BUPRENORPHINE                    | 9064      | 206                          | 12,562.51   | 60.98     |
| OXYCODONE                        | 9143      | 206                          | 233,433.22  | 1,133.17  |
| HYDROMORPHONE                    | 9150      | 198                          | 5,959.87    | 30.10     |
| HYDROCODONE                      | 9193      | 205                          | 19,137.47   | 93.35     |
| MEPERIDINE (PETHIDINE)           | 9230      | 18                           | 265.26      | 14.74     |
| METHADONE                        | 9250B     | 160                          | 8,741.42    | 54.63     |
| MORPHINE                         | 9300      | 203                          | 67,839.35   | 334.18    |
| OXYMORPHONE                      | 9652      | 121                          | 5,858.87    | 48.42     |
| TAPENTADOL                       | 9780      | 156                          | 21,632.00   | 138.67    |
| FENTANYL BASE                    | 9801      | 198                          | 921.39      | 4.65      |

**BUSINESS ACTIVITY: B - HOSPITALS**

| DRUG NAME                        | DRUG CODE | NUMBER OF REGISTRANT SOLD TO | TOTAL GRAMS | AVG GRAMS |
|----------------------------------|-----------|------------------------------|-------------|-----------|
| AMPHETAMINE                      | 1100      | 16                           | 2,069.59    | 129.35    |
| LISDEXAMFETAMINE                 | 1205      | 8                            | 557.29      | 69.66     |
| METHYLPHENIDATE (DL;D;L;ISOMERS) | 1724      | 17                           | 1,805.77    | 106.22    |
| CODEINE                          | 9050      | 18                           | 1,197.37    | 66.52     |
| BUPRENORPHINE                    | 9064      | 18                           | 883.89      | 49.10     |
| OXYCODONE                        | 9143      | 26                           | 9,023.21    | 347.05    |
| HYDROMORPHONE                    | 9150      | 25                           | 478.61      | 19.14     |
| HYDROCODONE                      | 9193      | 24                           | 864.80      | 36.03     |
| MEPERIDINE (PETHIDINE)           | 9230      | 17                           | 294.02      | 17.30     |
| METHADONE                        | 9250B     | 18                           | 1,014.34    | 56.35     |
| MORPHINE                         | 9300      | 23                           | 4,932.84    | 214.47    |
| OXYMORPHONE                      | 9652      | 5                            | 10.88       | 2.18      |
| TAPENTADOL                       | 9780      | 5                            | 272.50      | 54.50     |
| FENTANYL BASE                    | 9801      | 35                           | 82.06       | 2.34      |

**BUSINESS ACTIVITY: C - PRACTITIONERS**

| DRUG NAME     | DRUG CODE | NUMBER OF REGISTRANT SOLD TO | TOTAL GRAMS | AVG GRAMS |
|---------------|-----------|------------------------------|-------------|-----------|
| CODEINE       | 9050      | 13                           | 757.06      | 58.24     |
| BUPRENORPHINE | 9064      | 68                           | 18.71       | 0.28      |
| OXYCODONE     | 9143      | 5                            | 3.90        | 0.78      |

|                        |       |    |       |      |
|------------------------|-------|----|-------|------|
| HYDROMORPHONE          | 9150  | 36 | 33.90 | 0.94 |
| HYDROCODONE            | 9193  | 23 | 60.06 | 2.61 |
| MEPERIDINE (PETHIDINE) | 9230  | 1  | 1.09  | 1.09 |
| METHADONE              | 9250B | 6  | 4.83  | 0.80 |
| MORPHINE               | 9300  | 11 | 55.68 | 5.06 |
| FENTANYL BASE          | 9801  | 54 | 4.57  | 0.08 |

**BUSINESS ACTIVITY: M - MID-LEVEL PRACTITIONERS**

| DRUG NAME | DRUG CODE | NUMBER OF REGISTRANT SOLD TO | TOTAL GRAMS | AVG GRAMS |
|-----------|-----------|------------------------------|-------------|-----------|
| CODEINE   | 9050      | 1                            | 0.65        | 0.65      |
| MORPHINE  | 9300      | 1                            | 0.19        | 0.19      |

**BUSINESS ACTIVITY: NTP - NARCOTIC TREATMENT PROGRAMS**

| DRUG NAME     | DRUG CODE | NUMBER OF REGISTRANT SOLD TO | TOTAL GRAMS | AVG GRAMS |
|---------------|-----------|------------------------------|-------------|-----------|
| BUPRENORPHINE | 9064      | 17                           | 2,440.49    | 143.56    |
| METHADONE     | 9250B     | 15                           | 115,154.00  | 7,676.93  |

**STATE: FL - FLORIDA****BUSINESS ACTIVITY: A - PHARMACIES**

| DRUG NAME                        | DRUG CODE | NUMBER OF REGISTRANT SOLD TO | TOTAL GRAMS  | AVG GRAMS |
|----------------------------------|-----------|------------------------------|--------------|-----------|
| AMPHETAMINE                      | 1100      | 4,331                        | 1,255,941.60 | 289.99    |
| METHAMPHETAMINE                  | 1105      | 76                           | 190.86       | 2.51      |
| LISDEXAMFETAMINE                 | 1205      | 3,970                        | 533,514.62   | 134.39    |
| METHYLPHENIDATE (DL;D;L;ISOMERS) | 1724      | 4,166                        | 755,015.58   | 181.23    |
| CODEINE                          | 9050      | 4,370                        | 581,073.01   | 132.97    |
| BUPRENORPHINE                    | 9064      | 3,993                        | 198,252.91   | 49.65     |
| OXYCODONE                        | 9143      | 4,514                        | 3,571,232.50 | 791.15    |
| HYDROMORPHONE                    | 9150      | 3,973                        | 143,347.92   | 36.08     |
| HYDROCODONE                      | 9193      | 4,448                        | 1,149,565.30 | 258.45    |
| MEPERIDINE (PETHIDINE)           | 9230      | 1,112                        | 18,260.64    | 16.42     |
| METHADONE                        | 9250B     | 3,325                        | 180,193.34   | 54.19     |
| MORPHINE                         | 9300      | 4,215                        | 1,279,349.30 | 303.52    |
| OXYMORPHONE                      | 9652      | 1,697                        | 40,885.84    | 24.09     |
| TAPENTADOL                       | 9780      | 2,569                        | 286,054.00   | 111.35    |
| FENTANYL BASE                    | 9801      | 3,959                        | 16,658.78    | 4.21      |

**BUSINESS ACTIVITY: B - HOSPITALS**

| DRUG NAME                        | DRUG CODE | NUMBER OF REGISTRANT SOLD TO | TOTAL GRAMS | AVG GRAMS |
|----------------------------------|-----------|------------------------------|-------------|-----------|
| AMPHETAMINE                      | 1100      | 191                          | 30,846.02   | 161.50    |
| METHAMPHETAMINE                  | 1105      | 1                            | 5.63        | 5.63      |
| LISDEXAMFETAMINE                 | 1205      | 87                           | 7,463.85    | 85.79     |
| METHYLPHENIDATE (DL;D;L;ISOMERS) | 1724      | 271                          | 28,904.44   | 106.66    |
| CODEINE                          | 9050      | 395                          | 17,882.59   | 45.27     |
| BUPRENORPHINE                    | 9064      | 295                          | 7,323.99    | 24.83     |

|                        |       |     |            |        |
|------------------------|-------|-----|------------|--------|
| OXYCODONE              | 9143  | 580 | 122,879.66 | 211.86 |
| HYDROMORPHONE          | 9150  | 591 | 11,752.01  | 19.88  |
| HYDROCODONE            | 9193  | 567 | 49,567.19  | 87.42  |
| MEPERIDINE (PETHIDINE) | 9230  | 464 | 8,840.17   | 19.05  |
| METHADONE              | 9250B | 321 | 8,942.51   | 27.86  |
| MORPHINE               | 9300  | 631 | 86,258.78  | 136.70 |
| OXYMORPHONE            | 9652  | 22  | 92.24      | 4.19   |
| TAPENTADOL             | 9780  | 83  | 5,215.50   | 62.84  |
| FENTANYL BASE          | 9801  | 792 | 1,873.63   | 2.37   |

**BUSINESS ACTIVITY: C - PRACTITIONERS**

| DRUG NAME                        | DRUG CODE | NUMBER OF REGISTRANT SOLD TO | TOTAL GRAMS | AVG GRAMS |
|----------------------------------|-----------|------------------------------|-------------|-----------|
| AMPHETAMINE                      | 1100      | 19                           | 114.59      | 6.03      |
| LISDEXAMFETAMINE                 | 1205      | 8                            | 121.20      | 15.15     |
| METHYLPHENIDATE (DL;D;L;ISOMERS) | 1724      | 6                            | 961.66      | 160.28    |
| CODEINE                          | 9050      | 158                          | 1,541.84    | 9.76      |
| BUPRENORPHINE                    | 9064      | 2,114                        | 496.24      | 0.23      |
| OXYCODONE                        | 9143      | 74                           | 389.05      | 5.26      |
| HYDROMORPHONE                    | 9150      | 631                          | 420.90      | 0.67      |
| HYDROCODONE                      | 9193      | 876                          | 3,325.21    | 3.80      |
| MEPERIDINE (PETHIDINE)           | 9230      | 254                          | 2,832.27    | 11.15     |
| METHADONE                        | 9250B     | 31                           | 61.89       | 2.00      |
| MORPHINE                         | 9300      | 413                          | 716.41      | 1.73      |
| FENTANYL BASE                    | 9801      | 1,245                        | 77.73       | 0.06      |

**BUSINESS ACTIVITY: D - TEACHING INSTITUTIONS**

| DRUG NAME     | DRUG CODE | NUMBER OF REGISTRANT SOLD TO | TOTAL GRAMS | AVG GRAMS |
|---------------|-----------|------------------------------|-------------|-----------|
| BUPRENORPHINE | 9064      | 1                            | 0.00        | 0.00      |

**BUSINESS ACTIVITY: M - MID-LEVEL PRACTITIONERS**

| DRUG NAME     | DRUG CODE | NUMBER OF REGISTRANT SOLD TO | TOTAL GRAMS | AVG GRAMS |
|---------------|-----------|------------------------------|-------------|-----------|
| BUPRENORPHINE | 9064      | 2                            | 1.29        | 0.65      |

**BUSINESS ACTIVITY: NTP - NARCOTIC TREATMENT PROGRAMS**

| DRUG NAME     | DRUG CODE | NUMBER OF REGISTRANT SOLD TO | TOTAL GRAMS | AVG GRAMS |
|---------------|-----------|------------------------------|-------------|-----------|
| BUPRENORPHINE | 9064      | 54                           | 2,043.64    | 37.85     |
| METHADONE     | 9250B     | 58                           | 565,832.32  | 9,755.73  |

**STATE: GA - GEORGIA****BUSINESS ACTIVITY: A - PHARMACIES**

| DRUG NAME                        | DRUG CODE | NUMBER OF REGISTRANT SOLD TO | TOTAL GRAMS | AVG GRAMS |
|----------------------------------|-----------|------------------------------|-------------|-----------|
| AMPHETAMINE                      | 1100      | 2,413                        | 768,553.75  | 318.51    |
| METHAMPHETAMINE                  | 1105      | 31                           | 77.95       | 2.51      |
| LISDEXAMFETAMINE                 | 1205      | 2,312                        | 385,377.07  | 166.69    |
| METHYLPHENIDATE (DL;D;L;ISOMERS) | 1724      | 2,397                        | 610,937.76  | 254.88    |

|                        |       |       |              |        |
|------------------------|-------|-------|--------------|--------|
| CODEINE                | 9050  | 2,372 | 351,636.29   | 148.24 |
| BUPRENORPHINE          | 9064  | 2,285 | 65,140.88    | 28.51  |
| OXYCODONE              | 9143  | 2,433 | 1,518,244.84 | 624.02 |
| HYDROMORPHONE          | 9150  | 2,069 | 21,876.46    | 10.57  |
| HYDROCODONE            | 9193  | 2,444 | 801,140.24   | 327.80 |
| MEPERIDINE (PETHIDINE) | 9230  | 1,215 | 24,322.85    | 20.02  |
| METHADONE              | 9250B | 1,935 | 79,762.59    | 41.22  |
| MORPHINE               | 9300  | 2,333 | 362,140.56   | 155.23 |
| OXYMORPHONE            | 9652  | 817   | 11,392.61    | 13.94  |
| TAPENTADOL             | 9780  | 1,663 | 201,658.00   | 121.26 |
| FENTANYL BASE          | 9801  | 2,277 | 7,638.53     | 3.35   |

**BUSINESS ACTIVITY: B - HOSPITALS**

| DRUG NAME                        | DRUG CODE | NUMBER OF REGISTRANT SOLD TO | TOTAL GRAMS | AVG GRAMS |
|----------------------------------|-----------|------------------------------|-------------|-----------|
| AMPHETAMINE                      | 1100      | 97                           | 17,494.47   | 180.36    |
| METHAMPHETAMINE                  | 1105      | 2                            | 10.85       | 5.42      |
| LISDEXAMFETAMINE                 | 1205      | 55                           | 6,545.83    | 119.02    |
| METHYLPHENIDATE (DL;D;L;ISOMERS) | 1724      | 143                          | 19,898.93   | 139.15    |
| CODEINE                          | 9050      | 193                          | 11,307.08   | 58.59     |
| BUPRENORPHINE                    | 9064      | 114                          | 2,066.80    | 18.13     |
| OXYCODONE                        | 9143      | 227                          | 58,890.71   | 259.43    |
| HYDROMORPHONE                    | 9150      | 196                          | 4,965.95    | 25.34     |
| HYDROCODONE                      | 9193      | 221                          | 38,260.00   | 173.12    |
| MEPERIDINE (PETHIDINE)           | 9230      | 162                          | 7,226.26    | 44.61     |
| METHADONE                        | 9250B     | 163                          | 3,558.07    | 21.83     |
| MORPHINE                         | 9300      | 220                          | 33,598.04   | 152.72    |
| OXYMORPHONE                      | 9652      | 7                            | 17.04       | 2.43      |
| TAPENTADOL                       | 9780      | 55                           | 3,381.50    | 61.48     |
| FENTANYL BASE                    | 9801      | 207                          | 1,085.56    | 5.24      |

**BUSINESS ACTIVITY: C - PRACTITIONERS**

| DRUG NAME                        | DRUG CODE | NUMBER OF REGISTRANT SOLD TO | TOTAL GRAMS | AVG GRAMS |
|----------------------------------|-----------|------------------------------|-------------|-----------|
| AMPHETAMINE                      | 1100      | 7                            | 32.30       | 4.61      |
| LISDEXAMFETAMINE                 | 1205      | 1                            | 2.72        | 2.72      |
| METHYLPHENIDATE (DL;D;L;ISOMERS) | 1724      | 2                            | 0.78        | 0.39      |
| CODEINE                          | 9050      | 216                          | 2,968.22    | 13.74     |
| BUPRENORPHINE                    | 9064      | 835                          | 326.78      | 0.39      |
| OXYCODONE                        | 9143      | 110                          | 2,428.52    | 22.08     |
| HYDROMORPHONE                    | 9150      | 343                          | 219.82      | 0.64      |
| HYDROCODONE                      | 9193      | 449                          | 3,436.67    | 7.65      |
| MEPERIDINE (PETHIDINE)           | 9230      | 211                          | 1,910.76    | 9.06      |
| METHADONE                        | 9250B     | 12                           | 47.85       | 3.99      |

|               |      |     |        |      |
|---------------|------|-----|--------|------|
| MORPHINE      | 9300 | 314 | 841.98 | 2.68 |
| FENTANYL BASE | 9801 | 835 | 65.85  | 0.08 |

**BUSINESS ACTIVITY: M - MID-LEVEL PRACTITIONERS**

| DRUG NAME | DRUG CODE | NUMBER OF REGISTRANT SOLD TO | TOTAL GRAMS | AVG GRAMS |
|-----------|-----------|------------------------------|-------------|-----------|
| CODEINE   | 9050      | 23                           | 17.11       | 0.74      |

**BUSINESS ACTIVITY: NTP - NARCOTIC TREATMENT PROGRAMS**

| DRUG NAME     | DRUG CODE | NUMBER OF REGISTRANT SOLD TO | TOTAL GRAMS | AVG GRAMS |
|---------------|-----------|------------------------------|-------------|-----------|
| BUPRENORPHINE | 9064      | 33                           | 1,615.45    | 48.95     |
| METHADONE     | 9250B     | 74                           | 365,866.39  | 4,944.14  |

**STATE: GU - GUAM****BUSINESS ACTIVITY: A - PHARMACIES**

| DRUG NAME                        | DRUG CODE | NUMBER OF REGISTRANT SOLD TO | TOTAL GRAMS | AVG GRAMS |
|----------------------------------|-----------|------------------------------|-------------|-----------|
| AMPHETAMINE                      | 1100      | 11                           | 1,070.01    | 97.27     |
| LISDEXAMFETAMINE                 | 1205      | 3                            | 35.84       | 11.95     |
| METHYLPHENIDATE (DL;D;L;ISOMERS) | 1724      | 10                           | 677.29      | 67.73     |
| CODEINE                          | 9050      | 18                           | 3,015.68    | 167.54    |
| BUPRENORPHINE                    | 9064      | 3                            | 2.16        | 0.72      |
| OXYCODONE                        | 9143      | 12                           | 2,335.35    | 194.61    |
| HYDROMORPHONE                    | 9150      | 4                            | 66.32       | 16.58     |
| HYDROCODONE                      | 9193      | 11                           | 298.10      | 27.10     |
| METHADONE                        | 9250B     | 2                            | 127.00      | 63.50     |
| MORPHINE                         | 9300      | 10                           | 2,822.41    | 282.24    |
| FENTANYL BASE                    | 9801      | 7                            | 15.54       | 2.22      |

**BUSINESS ACTIVITY: B - HOSPITALS**

| DRUG NAME                        | DRUG CODE | NUMBER OF REGISTRANT SOLD TO | TOTAL GRAMS | AVG GRAMS |
|----------------------------------|-----------|------------------------------|-------------|-----------|
| AMPHETAMINE                      | 1100      | 4                            | 689.37      | 172.34    |
| LISDEXAMFETAMINE                 | 1205      | 1                            | 8.09        | 8.09      |
| METHYLPHENIDATE (DL;D;L;ISOMERS) | 1724      | 4                            | 1,307.45    | 326.86    |
| CODEINE                          | 9050      | 6                            | 578.79      | 96.46     |
| BUPRENORPHINE                    | 9064      | 2                            | 0.02        | 0.01      |
| OXYCODONE                        | 9143      | 6                            | 810.48      | 135.08    |
| HYDROMORPHONE                    | 9150      | 8                            | 23.49       | 2.94      |
| HYDROCODONE                      | 9193      | 6                            | 187.46      | 31.24     |
| MEPERIDINE (PETHIDINE)           | 9230      | 3                            | 19.61       | 6.54      |
| METHADONE                        | 9250B     | 3                            | 36.22       | 12.07     |
| MORPHINE                         | 9300      | 7                            | 542.36      | 77.48     |
| FENTANYL BASE                    | 9801      | 7                            | 16.78       | 2.40      |

**BUSINESS ACTIVITY: C - PRACTITIONERS**

| DRUG NAME | DRUG CODE | NUMBER OF REGISTRANT SOLD TO | TOTAL GRAMS | AVG GRAMS |
|-----------|-----------|------------------------------|-------------|-----------|
| CODEINE   | 9050      | 1                            | 4.42        | 4.42      |

|                        |      |   |        |       |
|------------------------|------|---|--------|-------|
| BUPRENORPHINE          | 9064 | 2 | 0.12   | 0.06  |
| HYDROMORPHONE          | 9150 | 3 | 0.71   | 0.24  |
| HYDROCODONE            | 9193 | 2 | 10.90  | 5.45  |
| MEPERIDINE (PETHIDINE) | 9230 | 4 | 101.31 | 25.33 |
| MORPHINE               | 9300 | 4 | 1.93   | 0.48  |
| FENTANYL BASE          | 9801 | 5 | 0.45   | 0.09  |

**STATE: HI - HAWAII****BUSINESS ACTIVITY: A - PHARMACIES**

| DRUG NAME                        | DRUG CODE | NUMBER OF REGISTRANT SOLD TO | TOTAL GRAMS | AVG GRAMS |
|----------------------------------|-----------|------------------------------|-------------|-----------|
| AMPHETAMINE                      | 1100      | 219                          | 32,601.50   | 148.87    |
| METHAMPHETAMINE                  | 1105      | 4                            | 22.10       | 5.52      |
| LISDEXAMFETAMINE                 | 1205      | 148                          | 4,643.88    | 31.38     |
| METHYLPHENIDATE (DL;D;L;ISOMERS) | 1724      | 212                          | 32,605.68   | 153.80    |
| CODEINE                          | 9050      | 227                          | 42,160.52   | 185.73    |
| BUPRENORPHINE                    | 9064      | 200                          | 8,265.51    | 41.33     |
| OXYCODONE                        | 9143      | 225                          | 130,238.78  | 578.84    |
| HYDROMORPHONE                    | 9150      | 143                          | 1,585.92    | 11.09     |
| HYDROCODONE                      | 9193      | 227                          | 54,078.77   | 238.23    |
| MEPERIDINE (PETHIDINE)           | 9230      | 24                           | 816.16      | 34.01     |
| METHADONE                        | 9250B     | 155                          | 10,352.50   | 66.79     |
| MORPHINE                         | 9300      | 206                          | 62,223.21   | 302.05    |
| OXYMORPHONE                      | 9652      | 41                           | 608.95      | 14.85     |
| TAPENTADOL                       | 9780      | 65                           | 7,545.00    | 116.08    |
| FENTANYL BASE                    | 9801      | 180                          | 479.51      | 2.66      |

**BUSINESS ACTIVITY: B - HOSPITALS**

| DRUG NAME                        | DRUG CODE | NUMBER OF REGISTRANT SOLD TO | TOTAL GRAMS | AVG GRAMS |
|----------------------------------|-----------|------------------------------|-------------|-----------|
| AMPHETAMINE                      | 1100      | 17                           | 8,631.86    | 507.76    |
| LISDEXAMFETAMINE                 | 1205      | 12                           | 1,471.26    | 122.61    |
| METHYLPHENIDATE (DL;D;L;ISOMERS) | 1724      | 23                           | 11,143.05   | 484.48    |
| CODEINE                          | 9050      | 38                           | 3,613.89    | 95.10     |
| BUPRENORPHINE                    | 9064      | 23                           | 324.33      | 14.10     |
| OXYCODONE                        | 9143      | 39                           | 16,044.10   | 411.39    |
| HYDROMORPHONE                    | 9150      | 36                           | 450.48      | 12.51     |
| HYDROCODONE                      | 9193      | 37                           | 4,670.95    | 126.24    |
| MEPERIDINE (PETHIDINE)           | 9230      | 26                           | 267.44      | 10.29     |
| METHADONE                        | 9250B     | 27                           | 903.25      | 33.45     |
| MORPHINE                         | 9300      | 41                           | 7,697.49    | 187.74    |
| OXYMORPHONE                      | 9652      | 3                            | 249.34      | 83.11     |
| TAPENTADOL                       | 9780      | 8                            | 537.00      | 67.13     |
| FENTANYL BASE                    | 9801      | 44                           | 137.09      | 3.12      |

**BUSINESS ACTIVITY: C - PRACTITIONERS**

| DRUG NAME              | DRUG CODE | NUMBER OF REGISTRANT SOLD TO | TOTAL GRAMS | AVG GRAMS |
|------------------------|-----------|------------------------------|-------------|-----------|
| CODEINE                | 9050      | 15                           | 650.65      | 43.38     |
| BUPRENORPHINE          | 9064      | 82                           | 4.65        | 0.06      |
| OXYCODONE              | 9143      | 18                           | 1,660.41    | 92.24     |
| HYDROMORPHONE          | 9150      | 38                           | 25.05       | 0.66      |
| HYDROCODONE            | 9193      | 51                           | 1,661.50    | 32.58     |
| MEPERIDINE (PETHIDINE) | 9230      | 18                           | 150.88      | 8.38      |
| METHADONE              | 9250B     | 2                            | 3.40        | 1.70      |
| MORPHINE               | 9300      | 20                           | 221.02      | 11.05     |
| OXYMORPHONE            | 9652      | 1                            | 2.41        | 2.41      |
| FENTANYL BASE          | 9801      | 53                           | 3.68        | 0.07      |

**BUSINESS ACTIVITY: M - MID-LEVEL PRACTITIONERS**

| DRUG NAME     | DRUG CODE | NUMBER OF REGISTRANT SOLD TO | TOTAL GRAMS | AVG GRAMS |
|---------------|-----------|------------------------------|-------------|-----------|
| MORPHINE      | 9300      | 1                            | 0.94        | 0.94      |
| FENTANYL BASE | 9801      | 1                            | 0.02        | 0.02      |

**BUSINESS ACTIVITY: NTP - NARCOTIC TREATMENT PROGRAMS**

| DRUG NAME | DRUG CODE | NUMBER OF REGISTRANT SOLD TO | TOTAL GRAMS | AVG GRAMS |
|-----------|-----------|------------------------------|-------------|-----------|
| METHADONE | 9250B     | 4                            | 16,635.84   | 4,158.96  |

**STATE: IA - IOWA****BUSINESS ACTIVITY: A - PHARMACIES**

| DRUG NAME                        | DRUG CODE | NUMBER OF REGISTRANT SOLD TO | TOTAL GRAMS | AVG GRAMS |
|----------------------------------|-----------|------------------------------|-------------|-----------|
| AMPHETAMINE                      | 1100      | 693                          | 205,396.16  | 296.39    |
| METHAMPHETAMINE                  | 1105      | 18                           | 70.32       | 3.91      |
| LISDEXAMFETAMINE                 | 1205      | 669                          | 135,066.71  | 201.89    |
| METHYLPHENIDATE (DL;D;L;ISOMERS) | 1724      | 697                          | 309,846.68  | 444.54    |
| CODEINE                          | 9050      | 689                          | 68,251.26   | 99.06     |
| BUPRENORPHINE                    | 9064      | 566                          | 7,048.17    | 12.45     |
| OXYCODONE                        | 9143      | 699                          | 165,463.13  | 236.71    |
| HYDROMORPHONE                    | 9150      | 636                          | 7,551.21    | 11.87     |
| HYDROCODONE                      | 9193      | 708                          | 178,882.83  | 252.66    |
| MEPERIDINE (PETHIDINE)           | 9230      | 105                          | 2,277.34    | 21.69     |
| METHADONE                        | 9250B     | 512                          | 12,999.48   | 25.39     |
| MORPHINE                         | 9300      | 692                          | 102,100.29  | 147.54    |
| OXYMORPHONE                      | 9652      | 136                          | 1,713.41    | 12.60     |
| TAPENTADOL                       | 9780      | 387                          | 36,323.00   | 93.86     |
| FENTANYL BASE                    | 9801      | 674                          | 2,608.86    | 3.87      |

**BUSINESS ACTIVITY: B - HOSPITALS**

| DRUG NAME   | DRUG CODE | NUMBER OF REGISTRANT SOLD TO | TOTAL GRAMS | AVG GRAMS |
|-------------|-----------|------------------------------|-------------|-----------|
| AMPHETAMINE | 1100      | 47                           | 5,407.17    | 115.05    |

|                                  |       |     |           |       |
|----------------------------------|-------|-----|-----------|-------|
| METHAMPHETAMINE                  | 1105  | 1   | 0.40      | 0.40  |
| LISDEXAMFETAMINE                 | 1205  | 33  | 1,779.39  | 53.92 |
| METHYLPHENIDATE (DL;D;L;ISOMERS) | 1724  | 79  | 7,126.80  | 90.21 |
| CODEINE                          | 9050  | 109 | 2,342.47  | 21.49 |
| BUPRENORPHINE                    | 9064  | 66  | 454.96    | 6.89  |
| OXYCODONE                        | 9143  | 143 | 12,214.68 | 85.42 |
| HYDROMORPHONE                    | 9150  | 141 | 1,985.76  | 14.08 |
| HYDROCODONE                      | 9193  | 146 | 11,987.39 | 82.11 |
| MEPERIDINE (PETHIDINE)           | 9230  | 105 | 3,259.04  | 31.04 |
| METHADONE                        | 9250B | 73  | 1,042.15  | 14.28 |
| MORPHINE                         | 9300  | 144 | 13,314.78 | 92.46 |
| OXYMORPHONE                      | 9652  | 5   | 12.31     | 2.46  |
| TAPENTADOL                       | 9780  | 34  | 782.50    | 23.01 |
| FENTANYL BASE                    | 9801  | 150 | 279.76    | 1.87  |

**BUSINESS ACTIVITY: C - PRACTITIONERS**

| DRUG NAME              | DRUG CODE | NUMBER OF REGISTRANT SOLD TO | TOTAL GRAMS | AVG GRAMS |
|------------------------|-----------|------------------------------|-------------|-----------|
| CODEINE                | 9050      | 14                           | 247.67      | 17.69     |
| BUPRENORPHINE          | 9064      | 273                          | 17.32       | 0.06      |
| OXYCODONE              | 9143      | 7                            | 99.87       | 14.27     |
| HYDROMORPHONE          | 9150      | 67                           | 42.37       | 0.63      |
| HYDROCODONE            | 9193      | 106                          | 372.03      | 3.51      |
| MEPERIDINE (PETHIDINE) | 9230      | 20                           | 1,051.25    | 52.56     |
| MORPHINE               | 9300      | 72                           | 66.57       | 0.92      |
| FENTANYL BASE          | 9801      | 109                          | 35.23       | 0.32      |

**BUSINESS ACTIVITY: D - TEACHING INSTITUTIONS**

| DRUG NAME     | DRUG CODE | NUMBER OF REGISTRANT SOLD TO | TOTAL GRAMS | AVG GRAMS |
|---------------|-----------|------------------------------|-------------|-----------|
| BUPRENORPHINE | 9064      | 1                            | 0.00        | 0.00      |

**BUSINESS ACTIVITY: M - MID-LEVEL PRACTITIONERS**

| DRUG NAME     | DRUG CODE | NUMBER OF REGISTRANT SOLD TO | TOTAL GRAMS | AVG GRAMS |
|---------------|-----------|------------------------------|-------------|-----------|
| BUPRENORPHINE | 9064      | 1                            | 0.00        | 0.00      |
| FENTANYL BASE | 9801      | 1                            | 0.01        | 0.01      |

**BUSINESS ACTIVITY: NTP - NARCOTIC TREATMENT PROGRAMS**

| DRUG NAME     | DRUG CODE | NUMBER OF REGISTRANT SOLD TO | TOTAL GRAMS | AVG GRAMS |
|---------------|-----------|------------------------------|-------------|-----------|
| BUPRENORPHINE | 9064      | 10                           | 739.80      | 73.98     |
| METHADONE     | 9250B     | 14                           | 35,121.30   | 2,508.66  |

**STATE: ID - IDAHO****BUSINESS ACTIVITY: A - PHARMACIES**

| DRUG NAME       | DRUG CODE | NUMBER OF REGISTRANT SOLD TO | TOTAL GRAMS | AVG GRAMS |
|-----------------|-----------|------------------------------|-------------|-----------|
| AMPHETAMINE     | 1100      | 316                          | 111,181.69  | 351.84    |
| METHAMPHETAMINE | 1105      | 15                           | 55.44       | 3.70      |



|                                  |       |     |            |        |
|----------------------------------|-------|-----|------------|--------|
| LISDEXAMFETAMINE                 | 1205  | 302 | 38,453.48  | 127.33 |
| METHYLPHENIDATE (DL;D;L;ISOMERS) | 1724  | 314 | 108,724.50 | 346.26 |
| CODEINE                          | 9050  | 315 | 44,193.05  | 140.30 |
| BUPRENORPHINE                    | 9064  | 307 | 16,217.93  | 52.83  |
| OXYCODONE                        | 9143  | 316 | 201,970.59 | 639.15 |
| HYDROMORPHONE                    | 9150  | 301 | 6,076.56   | 20.19  |
| HYDROCODONE                      | 9193  | 319 | 191,811.91 | 601.29 |
| MEPERIDINE (PETHIDINE)           | 9230  | 101 | 2,125.81   | 21.05  |
| METHADONE                        | 9250B | 293 | 19,855.95  | 67.77  |
| MORPHINE                         | 9300  | 321 | 88,357.06  | 275.26 |
| OXYMORPHONE                      | 9652  | 147 | 2,868.41   | 19.51  |
| TAPENTADOL                       | 9780  | 204 | 21,668.50  | 106.22 |
| FENTANYL BASE                    | 9801  | 311 | 1,791.41   | 5.76   |

**BUSINESS ACTIVITY: B - HOSPITALS**

| DRUG NAME                        | DRUG CODE | NUMBER OF REGISTRANT SOLD TO | TOTAL GRAMS | AVG GRAMS |
|----------------------------------|-----------|------------------------------|-------------|-----------|
| AMPHETAMINE                      | 1100      | 23                           | 1,632.29    | 70.97     |
| LISDEXAMFETAMINE                 | 1205      | 10                           | 135.85      | 13.59     |
| METHYLPHENIDATE (DL;D;L;ISOMERS) | 1724      | 36                           | 1,743.31    | 48.43     |
| CODEINE                          | 9050      | 46                           | 1,794.34    | 39.01     |
| BUPRENORPHINE                    | 9064      | 33                           | 467.11      | 14.15     |
| OXYCODONE                        | 9143      | 59                           | 10,875.96   | 184.34    |
| HYDROMORPHONE                    | 9150      | 53                           | 856.39      | 16.16     |
| HYDROCODONE                      | 9193      | 61                           | 8,939.75    | 146.55    |
| MEPERIDINE (PETHIDINE)           | 9230      | 40                           | 550.79      | 13.77     |
| METHADONE                        | 9250B     | 39                           | 1,105.48    | 28.35     |
| MORPHINE                         | 9300      | 59                           | 8,509.67    | 144.23    |
| OXYMORPHONE                      | 9652      | 4                            | 18.11       | 4.53      |
| TAPENTADOL                       | 9780      | 8                            | 158.00      | 19.75     |
| FENTANYL BASE                    | 9801      | 57                           | 172.47      | 3.03      |

**BUSINESS ACTIVITY: C - PRACTITIONERS**

| DRUG NAME              | DRUG CODE | NUMBER OF REGISTRANT SOLD TO | TOTAL GRAMS | AVG GRAMS |
|------------------------|-----------|------------------------------|-------------|-----------|
| AMPHETAMINE            | 1100      | 2                            | 6.53        | 3.27      |
| CODEINE                | 9050      | 20                           | 2,637.16    | 131.86    |
| BUPRENORPHINE          | 9064      | 136                          | 14.13       | 0.10      |
| OXYCODONE              | 9143      | 15                           | 78.98       | 5.27      |
| HYDROMORPHONE          | 9150      | 79                           | 84.78       | 1.07      |
| HYDROCODONE            | 9193      | 93                           | 311.76      | 3.35      |
| MEPERIDINE (PETHIDINE) | 9230      | 19                           | 106.76      | 5.62      |
| METHADONE              | 9250B     | 5                            | 3.22        | 0.64      |
| MORPHINE               | 9300      | 71                           | 137.69      | 1.94      |

|               |      |     |       |      |
|---------------|------|-----|-------|------|
| FENTANYL BASE | 9801 | 128 | 19.28 | 0.15 |
|---------------|------|-----|-------|------|

**BUSINESS ACTIVITY: D - TEACHING INSTITUTIONS**

| DRUG NAME     | DRUG CODE | NUMBER OF REGISTRANT SOLD TO | TOTAL GRAMS | AVG GRAMS |
|---------------|-----------|------------------------------|-------------|-----------|
| BUPRENORPHINE | 9064      | 1                            | 0.00        | 0.00      |

**BUSINESS ACTIVITY: M - MID-LEVEL PRACTITIONERS**

| DRUG NAME              | DRUG CODE | NUMBER OF REGISTRANT SOLD TO | TOTAL GRAMS | AVG GRAMS |
|------------------------|-----------|------------------------------|-------------|-----------|
| CODEINE                | 9050      | 3                            | 69.30       | 23.10     |
| HYDROMORPHONE          | 9150      | 1                            | 0.10        | 0.10      |
| HYDROCODONE            | 9193      | 2                            | 1.66        | 0.83      |
| MEPERIDINE (PETHIDINE) | 9230      | 3                            | 4.36        | 1.45      |
| MORPHINE               | 9300      | 2                            | 0.05        | 0.03      |
| FENTANYL BASE          | 9801      | 3                            | 0.16        | 0.05      |

**BUSINESS ACTIVITY: NTP - NARCOTIC TREATMENT PROGRAMS**

| DRUG NAME     | DRUG CODE | NUMBER OF REGISTRANT SOLD TO | TOTAL GRAMS | AVG GRAMS |
|---------------|-----------|------------------------------|-------------|-----------|
| BUPRENORPHINE | 9064      | 4                            | 173.63      | 43.41     |
| METHADONE     | 9250B     | 4                            | 20,499.65   | 5,124.91  |

**STATE: IL - ILLINOIS****BUSINESS ACTIVITY: A - PHARMACIES**

| DRUG NAME                        | DRUG CODE | NUMBER OF REGISTRANT SOLD TO | TOTAL GRAMS | AVG GRAMS |
|----------------------------------|-----------|------------------------------|-------------|-----------|
| AMPHETAMINE                      | 1100      | 2,124                        | 790,152.37  | 372.01    |
| METHAMPHETAMINE                  | 1105      | 59                           | 204.12      | 3.46      |
| LISDEXAMFETAMINE                 | 1205      | 1,911                        | 286,934.15  | 150.15    |
| METHYLPHENIDATE (DL;D;L;ISOMERS) | 1724      | 2,087                        | 652,101.61  | 312.46    |
| CODEINE                          | 9050      | 2,175                        | 554,385.10  | 254.89    |
| BUPRENORPHINE                    | 9064      | 1,906                        | 62,310.89   | 32.69     |
| OXYCODONE                        | 9143      | 2,076                        | 513,545.03  | 247.37    |
| HYDROMORPHONE                    | 9150      | 1,764                        | 26,065.60   | 14.78     |
| HYDROCODONE                      | 9193      | 2,188                        | 974,995.92  | 445.61    |
| MEPERIDINE (PETHIDINE)           | 9230      | 175                          | 4,897.29    | 27.98     |
| METHADONE                        | 9250B     | 1,425                        | 39,182.05   | 27.50     |
| MORPHINE                         | 9300      | 1,968                        | 326,726.89  | 166.02    |
| OXYMORPHONE                      | 9652      | 599                          | 7,283.37    | 12.16     |
| TAPENTADOL                       | 9780      | 1,142                        | 112,005.00  | 98.08     |
| FENTANYL BASE                    | 9801      | 1,942                        | 8,404.94    | 4.33      |

**BUSINESS ACTIVITY: B - HOSPITALS**

| DRUG NAME                        | DRUG CODE | NUMBER OF REGISTRANT SOLD TO | TOTAL GRAMS | AVG GRAMS |
|----------------------------------|-----------|------------------------------|-------------|-----------|
| AMPHETAMINE                      | 1100      | 135                          | 9,957.16    | 73.76     |
| METHAMPHETAMINE                  | 1105      | 2                            | 3.62        | 1.81      |
| LISDEXAMFETAMINE                 | 1205      | 53                           | 2,133.19    | 40.25     |
| METHYLPHENIDATE (DL;D;L;ISOMERS) | 1724      | 190                          | 10,927.14   | 57.51     |

|                        |       |     |           |        |
|------------------------|-------|-----|-----------|--------|
| CODEINE                | 9050  | 239 | 11,092.73 | 46.41  |
| BUPRENORPHINE          | 9064  | 162 | 2,227.74  | 13.75  |
| OXYCODONE              | 9143  | 234 | 25,312.40 | 108.17 |
| HYDROMORPHONE          | 9150  | 235 | 6,114.84  | 26.02  |
| HYDROCODONE            | 9193  | 256 | 52,016.97 | 203.19 |
| MEPERIDINE (PETHIDINE) | 9230  | 169 | 3,522.54  | 20.84  |
| METHADONE              | 9250B | 189 | 5,752.54  | 30.44  |
| MORPHINE               | 9300  | 242 | 35,354.87 | 146.09 |
| OXYMORPHONE            | 9652  | 15  | 197.20    | 13.15  |
| TAPENTADOL             | 9780  | 43  | 1,972.00  | 45.86  |
| FENTANYL BASE          | 9801  | 237 | 1,044.76  | 4.41   |

**BUSINESS ACTIVITY: C - PRACTITIONERS**

| DRUG NAME                        | DRUG CODE | NUMBER OF REGISTRANT SOLD TO | TOTAL GRAMS | AVG GRAMS |
|----------------------------------|-----------|------------------------------|-------------|-----------|
| AMPHETAMINE                      | 1100      | 3                            | 16.86       | 5.62      |
| METHYLPHENIDATE (DL;D;L;ISOMERS) | 1724      | 1                            | 51.11       | 51.11     |
| CODEINE                          | 9050      | 214                          | 3,857.88    | 18.03     |
| BUPRENORPHINE                    | 9064      | 911                          | 72.88       | 0.08      |
| OXYCODONE                        | 9143      | 47                           | 145.25      | 3.09      |
| HYDROMORPHONE                    | 9150      | 391                          | 343.22      | 0.88      |
| HYDROCODONE                      | 9193      | 540                          | 3,044.81    | 5.64      |
| MEPERIDINE (PETHIDINE)           | 9230      | 108                          | 1,192.87    | 11.05     |
| METHADONE                        | 9250B     | 25                           | 48.48       | 1.94      |
| MORPHINE                         | 9300      | 267                          | 326.99      | 1.22      |
| FENTANYL BASE                    | 9801      | 630                          | 63.38       | 0.10      |

**BUSINESS ACTIVITY: D - TEACHING INSTITUTIONS**

| DRUG NAME     | DRUG CODE | NUMBER OF REGISTRANT SOLD TO | TOTAL GRAMS | AVG GRAMS |
|---------------|-----------|------------------------------|-------------|-----------|
| CODEINE       | 9050      | 1                            | 11.96       | 11.96     |
| BUPRENORPHINE | 9064      | 2                            | 0.87        | 0.44      |
| HYDROMORPHONE | 9150      | 1                            | 4.13        | 4.13      |
| HYDROCODONE   | 9193      | 1                            | 9.89        | 9.89      |
| METHADONE     | 9250B     | 1                            | 23.08       | 23.08     |
| MORPHINE      | 9300      | 1                            | 36.89       | 36.89     |
| FENTANYL BASE | 9801      | 1                            | 2.07        | 2.07      |

**BUSINESS ACTIVITY: M - MID-LEVEL PRACTITIONERS**

| DRUG NAME | DRUG CODE | NUMBER OF REGISTRANT SOLD TO | TOTAL GRAMS | AVG GRAMS |
|-----------|-----------|------------------------------|-------------|-----------|
| CODEINE   | 9050      | 6                            | 7.80        | 1.30      |

**BUSINESS ACTIVITY: NTP - NARCOTIC TREATMENT PROGRAMS**

| DRUG NAME     | DRUG CODE | NUMBER OF REGISTRANT SOLD TO | TOTAL GRAMS | AVG GRAMS |
|---------------|-----------|------------------------------|-------------|-----------|
| BUPRENORPHINE | 9064      | 13                           | 2,237.71    | 172.13    |
| METHADONE     | 9250B     | 83                           | 430,703.24  | 5,189.20  |

**STATE: IN - INDIANA****BUSINESS ACTIVITY: A - PHARMACIES**

| DRUG NAME                        | DRUG CODE | NUMBER OF REGISTRANT SOLD TO | TOTAL GRAMS | AVG GRAMS |
|----------------------------------|-----------|------------------------------|-------------|-----------|
| AMPHETAMINE                      | 1100      | 1,133                        | 535,506.80  | 472.65    |
| METHAMPHETAMINE                  | 1105      | 25                           | 102.47      | 4.10      |
| LISDEXAMFETAMINE                 | 1205      | 1,125                        | 329,076.49  | 292.51    |
| METHYLPHENIDATE (DL;D;L;ISOMERS) | 1724      | 1,135                        | 449,639.07  | 396.16    |
| CODEINE                          | 9050      | 1,116                        | 169,795.59  | 152.15    |
| BUPRENORPHINE                    | 9064      | 1,108                        | 93,581.04   | 84.46     |
| OXYCODONE                        | 9143      | 1,143                        | 763,241.37  | 667.75    |
| HYDROMORPHONE                    | 9150      | 1,002                        | 15,157.50   | 15.13     |
| HYDROCODONE                      | 9193      | 1,156                        | 745,666.23  | 645.04    |
| MEPERIDINE (PETHIDINE)           | 9230      | 261                          | 3,689.28    | 14.14     |
| METHADONE                        | 9250B     | 967                          | 51,047.43   | 52.79     |
| MORPHINE                         | 9300      | 1,114                        | 261,368.41  | 234.62    |
| OXYMORPHONE                      | 9652      | 487                          | 8,724.16    | 17.91     |
| TAPENTADOL                       | 9780      | 785                          | 119,129.50  | 151.76    |
| FENTANYL BASE                    | 9801      | 1,083                        | 5,105.52    | 4.71      |

**BUSINESS ACTIVITY: B - HOSPITALS**

| DRUG NAME                        | DRUG CODE | NUMBER OF REGISTRANT SOLD TO | TOTAL GRAMS | AVG GRAMS |
|----------------------------------|-----------|------------------------------|-------------|-----------|
| AMPHETAMINE                      | 1100      | 128                          | 9,269.25    | 72.42     |
| LISDEXAMFETAMINE                 | 1205      | 76                           | 4,886.68    | 64.30     |
| METHYLPHENIDATE (DL;D;L;ISOMERS) | 1724      | 150                          | 8,258.66    | 55.06     |
| CODEINE                          | 9050      | 159                          | 4,423.59    | 27.82     |
| BUPRENORPHINE                    | 9064      | 138                          | 2,517.86    | 18.25     |
| OXYCODONE                        | 9143      | 249                          | 33,389.89   | 134.10    |
| HYDROMORPHONE                    | 9150      | 243                          | 3,883.05    | 15.98     |
| HYDROCODONE                      | 9193      | 263                          | 37,192.71   | 141.42    |
| MEPERIDINE (PETHIDINE)           | 9230      | 199                          | 6,901.74    | 34.68     |
| METHADONE                        | 9250B     | 159                          | 3,323.67    | 20.90     |
| MORPHINE                         | 9300      | 263                          | 24,167.21   | 91.89     |
| OXYMORPHONE                      | 9652      | 12                           | 47.37       | 3.95      |
| TAPENTADOL                       | 9780      | 28                           | 1,188.00    | 42.43     |
| FENTANYL BASE                    | 9801      | 290                          | 722.70      | 2.49      |

**BUSINESS ACTIVITY: C - PRACTITIONERS**

| DRUG NAME     | DRUG CODE | NUMBER OF REGISTRANT SOLD TO | TOTAL GRAMS | AVG GRAMS |
|---------------|-----------|------------------------------|-------------|-----------|
| AMPHETAMINE   | 1100      | 1                            | 0.63        | 0.63      |
| CODEINE       | 9050      | 46                           | 473.94      | 10.30     |
| BUPRENORPHINE | 9064      | 498                          | 90.27       | 0.18      |
| OXYCODONE     | 9143      | 14                           | 39.85       | 2.85      |

|                        |       |     |        |      |
|------------------------|-------|-----|--------|------|
| HYDROMORPHONE          | 9150  | 185 | 121.99 | 0.66 |
| HYDROCODONE            | 9193  | 259 | 661.83 | 2.56 |
| MEPERIDINE (PETHIDINE) | 9230  | 51  | 153.60 | 3.01 |
| METHADONE              | 9250B | 4   | 1.97   | 0.49 |
| MORPHINE               | 9300  | 147 | 147.14 | 1.00 |
| FENTANYL BASE          | 9801  | 268 | 15.80  | 0.06 |

**BUSINESS ACTIVITY: M - MID-LEVEL PRACTITIONERS**

| DRUG NAME | DRUG CODE | NUMBER OF REGISTRANT SOLD TO | TOTAL GRAMS | AVG GRAMS |
|-----------|-----------|------------------------------|-------------|-----------|
| CODEINE   | 9050      | 4                            | 11.32       | 2.83      |

**BUSINESS ACTIVITY: NTP - NARCOTIC TREATMENT PROGRAMS**

| DRUG NAME     | DRUG CODE | NUMBER OF REGISTRANT SOLD TO | TOTAL GRAMS | AVG GRAMS |
|---------------|-----------|------------------------------|-------------|-----------|
| BUPRENORPHINE | 9064      | 9                            | 1,417.87    | 157.54    |
| METHADONE     | 9250B     | 19                           | 245,951.06  | 12,944.79 |

**STATE: KS - KANSAS****BUSINESS ACTIVITY: A - PHARMACIES**

| DRUG NAME                        | DRUG CODE | NUMBER OF REGISTRANT SOLD TO | TOTAL GRAMS | AVG GRAMS |
|----------------------------------|-----------|------------------------------|-------------|-----------|
| AMPHETAMINE                      | 1100      | 627                          | 245,451.29  | 391.47    |
| METHAMPHETAMINE                  | 1105      | 13                           | 57.86       | 4.45      |
| LISDEXAMFETAMINE                 | 1205      | 613                          | 125,699.75  | 205.06    |
| METHYLPHENIDATE (DL;D;L;ISOMERS) | 1724      | 624                          | 184,884.10  | 296.29    |
| CODEINE                          | 9050      | 608                          | 90,384.89   | 148.66    |
| BUPRENORPHINE                    | 9064      | 545                          | 10,232.46   | 18.78     |
| OXYCODONE                        | 9143      | 630                          | 393,201.39  | 624.13    |
| HYDROMORPHONE                    | 9150      | 553                          | 9,733.70    | 17.60     |
| HYDROCODONE                      | 9193      | 634                          | 262,648.46  | 414.27    |
| MEPERIDINE (PETHIDINE)           | 9230      | 197                          | 3,611.28    | 18.33     |
| METHADONE                        | 9250B     | 496                          | 22,110.02   | 44.58     |
| MORPHINE                         | 9300      | 613                          | 138,103.39  | 225.29    |
| OXYMORPHONE                      | 9652      | 201                          | 3,024.53    | 15.05     |
| TAPENTADOL                       | 9780      | 301                          | 25,053.00   | 83.23     |
| FENTANYL BASE                    | 9801      | 604                          | 3,071.41    | 5.09      |

**BUSINESS ACTIVITY: B - HOSPITALS**

| DRUG NAME                        | DRUG CODE | NUMBER OF REGISTRANT SOLD TO | TOTAL GRAMS | AVG GRAMS |
|----------------------------------|-----------|------------------------------|-------------|-----------|
| AMPHETAMINE                      | 1100      | 50                           | 9,096.04    | 181.92    |
| METHAMPHETAMINE                  | 1105      | 1                            | 3.62        | 3.62      |
| LISDEXAMFETAMINE                 | 1205      | 34                           | 2,152.84    | 63.32     |
| METHYLPHENIDATE (DL;D;L;ISOMERS) | 1724      | 84                           | 8,342.66    | 99.32     |
| CODEINE                          | 9050      | 148                          | 4,360.88    | 29.47     |
| BUPRENORPHINE                    | 9064      | 47                           | 715.49      | 15.22     |
| OXYCODONE                        | 9143      | 194                          | 28,062.01   | 144.65    |

|                        |       |     |           |       |
|------------------------|-------|-----|-----------|-------|
| HYDROMORPHONE          | 9150  | 172 | 1,581.41  | 9.19  |
| HYDROCODONE            | 9193  | 201 | 15,572.20 | 77.47 |
| MEPERIDINE (PETHIDINE) | 9230  | 132 | 1,709.34  | 12.95 |
| METHADONE              | 9250B | 90  | 1,533.80  | 17.04 |
| MORPHINE               | 9300  | 208 | 13,774.61 | 66.22 |
| OXYMORPHONE            | 9652  | 9   | 193.18    | 21.46 |
| TAPENTADOL             | 9780  | 33  | 916.50    | 27.77 |
| FENTANYL BASE          | 9801  | 206 | 372.38    | 1.81  |

**BUSINESS ACTIVITY: C - PRACTITIONERS**

| DRUG NAME                        | DRUG CODE | NUMBER OF REGISTRANT SOLD TO | TOTAL GRAMS | AVG GRAMS |
|----------------------------------|-----------|------------------------------|-------------|-----------|
| AMPHETAMINE                      | 1100      | 1                            | 3.77        | 3.77      |
| METHYLPHENIDATE (DL;D;L;ISOMERS) | 1724      | 1                            | 31.65       | 31.65     |
| CODEINE                          | 9050      | 29                           | 964.49      | 33.26     |
| BUPRENORPHINE                    | 9064      | 280                          | 65.25       | 0.23      |
| OXYCODONE                        | 9143      | 7                            | 153.11      | 21.87     |
| HYDROMORPHONE                    | 9150      | 97                           | 68.53       | 0.71      |
| HYDROCODONE                      | 9193      | 100                          | 177.80      | 1.78      |
| MEPERIDINE (PETHIDINE)           | 9230      | 20                           | 102.40      | 5.12      |
| METHADONE                        | 9250B     | 1                            | 1.79        | 1.79      |
| MORPHINE                         | 9300      | 52                           | 61.68       | 1.19      |
| FENTANYL BASE                    | 9801      | 109                          | 12.70       | 0.12      |

**BUSINESS ACTIVITY: D - TEACHING INSTITUTIONS**

| DRUG NAME     | DRUG CODE | NUMBER OF REGISTRANT SOLD TO | TOTAL GRAMS | AVG GRAMS |
|---------------|-----------|------------------------------|-------------|-----------|
| BUPRENORPHINE | 9064      | 1                            | 0.00        | 0.00      |

**BUSINESS ACTIVITY: M - MID-LEVEL PRACTITIONERS**

| DRUG NAME     | DRUG CODE | NUMBER OF REGISTRANT SOLD TO | TOTAL GRAMS | AVG GRAMS |
|---------------|-----------|------------------------------|-------------|-----------|
| HYDROMORPHONE | 9150      | 8                            | 0.27        | 0.03      |
| MORPHINE      | 9300      | 24                           | 5.49        | 0.23      |
| FENTANYL BASE | 9801      | 36                           | 0.49        | 0.01      |

**BUSINESS ACTIVITY: NTP - NARCOTIC TREATMENT PROGRAMS**

| DRUG NAME     | DRUG CODE | NUMBER OF REGISTRANT SOLD TO | TOTAL GRAMS | AVG GRAMS |
|---------------|-----------|------------------------------|-------------|-----------|
| BUPRENORPHINE | 9064      | 6                            | 255.30      | 42.55     |
| METHADONE     | 9250B     | 10                           | 59,855.48   | 5,985.55  |

**STATE: KY - KENTUCKY****BUSINESS ACTIVITY: A - PHARMACIES**

| DRUG NAME                        | DRUG CODE | NUMBER OF REGISTRANT SOLD TO | TOTAL GRAMS | AVG GRAMS |
|----------------------------------|-----------|------------------------------|-------------|-----------|
| AMPHETAMINE                      | 1100      | 1,217                        | 278,149.28  | 228.55    |
| METHAMPHETAMINE                  | 1105      | 21                           | 47.01       | 2.24      |
| LISDEXAMFETAMINE                 | 1205      | 1,139                        | 161,825.22  | 142.08    |
| METHYLPHENIDATE (DL;D;L;ISOMERS) | 1724      | 1,212                        | 282,140.45  | 232.79    |

|                        |       |       |            |        |
|------------------------|-------|-------|------------|--------|
| CODEINE                | 9050  | 1,163 | 164,055.91 | 141.06 |
| BUPRENORPHINE          | 9064  | 1,128 | 153,392.31 | 135.99 |
| OXYCODONE              | 9143  | 1,228 | 707,528.00 | 576.16 |
| HYDROMORPHONE          | 9150  | 789   | 6,981.12   | 8.85   |
| HYDROCODONE            | 9193  | 1,239 | 695,694.45 | 561.50 |
| MEPERIDINE (PETHIDINE) | 9230  | 232   | 3,838.19   | 16.54  |
| METHADONE              | 9250B | 947   | 39,086.53  | 41.27  |
| MORPHINE               | 9300  | 1,176 | 137,635.02 | 117.04 |
| OXYMORPHONE            | 9652  | 477   | 7,356.21   | 15.42  |
| TAPENTADOL             | 9780  | 528   | 45,918.00  | 86.97  |
| FENTANYL BASE          | 9801  | 1,108 | 3,054.26   | 2.76   |

**BUSINESS ACTIVITY: B - HOSPITALS**

| DRUG NAME                        | DRUG CODE | NUMBER OF REGISTRANT SOLD TO | TOTAL GRAMS | AVG GRAMS |
|----------------------------------|-----------|------------------------------|-------------|-----------|
| AMPHETAMINE                      | 1100      | 49                           | 8,356.59    | 170.54    |
| LISDEXAMFETAMINE                 | 1205      | 26                           | 1,976.14    | 76.01     |
| METHYLPHENIDATE (DL;D;L;ISOMERS) | 1724      | 83                           | 8,753.88    | 105.47    |
| CODEINE                          | 9050      | 122                          | 3,630.04    | 29.75     |
| BUPRENORPHINE                    | 9064      | 89                           | 1,678.82    | 18.86     |
| OXYCODONE                        | 9143      | 145                          | 31,652.74   | 218.29    |
| HYDROMORPHONE                    | 9150      | 131                          | 2,374.20    | 18.12     |
| HYDROCODONE                      | 9193      | 143                          | 25,293.38   | 176.88    |
| MEPERIDINE (PETHIDINE)           | 9230      | 113                          | 4,275.78    | 37.84     |
| METHADONE                        | 9250B     | 101                          | 2,607.84    | 25.82     |
| MORPHINE                         | 9300      | 144                          | 17,674.55   | 122.74    |
| OXYMORPHONE                      | 9652      | 13                           | 32.83       | 2.53      |
| TAPENTADOL                       | 9780      | 20                           | 1,867.50    | 93.38     |
| FENTANYL BASE                    | 9801      | 142                          | 477.79      | 3.36      |

**BUSINESS ACTIVITY: C - PRACTITIONERS**

| DRUG NAME              | DRUG CODE | NUMBER OF REGISTRANT SOLD TO | TOTAL GRAMS | AVG GRAMS |
|------------------------|-----------|------------------------------|-------------|-----------|
| AMPHETAMINE            | 1100      | 1                            | 1.97        | 1.97      |
| CODEINE                | 9050      | 15                           | 494.21      | 32.95     |
| BUPRENORPHINE          | 9064      | 302                          | 81.44       | 0.27      |
| OXYCODONE              | 9143      | 19                           | 18.24       | 0.96      |
| HYDROMORPHONE          | 9150      | 83                           | 106.41      | 1.28      |
| HYDROCODONE            | 9193      | 130                          | 552.94      | 4.25      |
| MEPERIDINE (PETHIDINE) | 9230      | 47                           | 434.66      | 9.25      |
| MORPHINE               | 9300      | 113                          | 360.63      | 3.19      |
| FENTANYL BASE          | 9801      | 280                          | 25.63       | 0.09      |

**BUSINESS ACTIVITY: NTP - NARCOTIC TREATMENT PROGRAMS**

| DRUG NAME | DRUG CODE | NUMBER OF REGISTRANT SOLD TO | TOTAL GRAMS | AVG GRAMS |
|-----------|-----------|------------------------------|-------------|-----------|
|-----------|-----------|------------------------------|-------------|-----------|

|               |       |    |            |          |
|---------------|-------|----|------------|----------|
| BUPRENORPHINE | 9064  | 18 | 477.28     | 26.52    |
| METHADONE     | 9250B | 28 | 157,422.45 | 5,622.23 |

**STATE: LA - LOUISIANA****BUSINESS ACTIVITY: A - PHARMACIES**

| DRUG NAME                        | DRUG CODE | NUMBER OF REGISTRANT SOLD TO | TOTAL GRAMS | AVG GRAMS |
|----------------------------------|-----------|------------------------------|-------------|-----------|
| AMPHETAMINE                      | 1100      | 1,230                        | 654,482.80  | 532.10    |
| METHAMPHETAMINE                  | 1105      | 28                           | 60.27       | 2.15      |
| LISDEXAMFETAMINE                 | 1205      | 1,208                        | 354,195.51  | 293.21    |
| METHYLPHENIDATE (DL;D;L;ISOMERS) | 1724      | 1,224                        | 321,243.86  | 262.45    |
| CODEINE                          | 9050      | 1,228                        | 149,078.98  | 121.40    |
| BUPRENORPHINE                    | 9064      | 1,099                        | 83,362.67   | 75.85     |
| OXYCODONE                        | 9143      | 1,241                        | 631,264.48  | 508.67    |
| HYDROMORPHONE                    | 9150      | 934                          | 8,707.01    | 9.32      |
| HYDROCODONE                      | 9193      | 1,253                        | 527,188.94  | 420.74    |
| MEPERIDINE (PETHIDINE)           | 9230      | 802                          | 14,779.38   | 18.43     |
| METHADONE                        | 9250B     | 710                          | 26,374.60   | 37.15     |
| MORPHINE                         | 9300      | 1,120                        | 168,893.40  | 150.80    |
| OXYMORPHONE                      | 9652      | 454                          | 15,555.28   | 34.26     |
| TAPENTADOL                       | 9780      | 583                          | 52,487.50   | 90.03     |
| FENTANYL BASE                    | 9801      | 1,082                        | 3,227.06    | 2.98      |

**BUSINESS ACTIVITY: B - HOSPITALS**

| DRUG NAME                        | DRUG CODE | NUMBER OF REGISTRANT SOLD TO | TOTAL GRAMS | AVG GRAMS |
|----------------------------------|-----------|------------------------------|-------------|-----------|
| AMPHETAMINE                      | 1100      | 56                           | 7,483.22    | 133.63    |
| LISDEXAMFETAMINE                 | 1205      | 28                           | 2,043.58    | 72.99     |
| METHYLPHENIDATE (DL;D;L;ISOMERS) | 1724      | 103                          | 4,595.23    | 44.61     |
| CODEINE                          | 9050      | 139                          | 2,848.03    | 20.49     |
| BUPRENORPHINE                    | 9064      | 98                           | 810.64      | 8.27      |
| OXYCODONE                        | 9143      | 190                          | 25,417.47   | 133.78    |
| HYDROMORPHONE                    | 9150      | 186                          | 2,119.97    | 11.40     |
| HYDROCODONE                      | 9193      | 202                          | 31,202.96   | 154.47    |
| MEPERIDINE (PETHIDINE)           | 9230      | 157                          | 6,920.02    | 44.08     |
| METHADONE                        | 9250B     | 128                          | 2,237.34    | 17.48     |
| MORPHINE                         | 9300      | 196                          | 15,767.25   | 80.45     |
| OXYMORPHONE                      | 9652      | 15                           | 50.76       | 3.38      |
| TAPENTADOL                       | 9780      | 14                           | 555.00      | 39.64     |
| FENTANYL BASE                    | 9801      | 191                          | 357.69      | 1.87      |

**BUSINESS ACTIVITY: C - PRACTITIONERS**

| DRUG NAME        | DRUG CODE | NUMBER OF REGISTRANT SOLD TO | TOTAL GRAMS | AVG GRAMS |
|------------------|-----------|------------------------------|-------------|-----------|
| LISDEXAMFETAMINE | 1205      | 1                            | 4.62        | 4.62      |
| CODEINE          | 9050      | 37                           | 942.10      | 25.46     |



|                        |       |     |        |      |
|------------------------|-------|-----|--------|------|
| BUPRENORPHINE          | 9064  | 330 | 15.81  | 0.05 |
| OXYCODONE              | 9143  | 14  | 23.13  | 1.65 |
| HYDROMORPHONE          | 9150  | 88  | 45.10  | 0.51 |
| HYDROCODONE            | 9193  | 213 | 458.52 | 2.15 |
| MEPERIDINE (PETHIDINE) | 9230  | 106 | 873.68 | 8.24 |
| METHADONE              | 9250B | 3   | 6.71   | 2.24 |
| MORPHINE               | 9300  | 128 | 98.75  | 0.77 |
| FENTANYL BASE          | 9801  | 266 | 18.74  | 0.07 |

**BUSINESS ACTIVITY: D - TEACHING INSTITUTIONS**

| DRUG NAME     | DRUG CODE | NUMBER OF REGISTRANT SOLD TO | TOTAL GRAMS | AVG GRAMS |
|---------------|-----------|------------------------------|-------------|-----------|
| FENTANYL BASE | 9801      | 1                            | 0.03        | 0.03      |

**BUSINESS ACTIVITY: NTP - NARCOTIC TREATMENT PROGRAMS**

| DRUG NAME     | DRUG CODE | NUMBER OF REGISTRANT SOLD TO | TOTAL GRAMS | AVG GRAMS |
|---------------|-----------|------------------------------|-------------|-----------|
| BUPRENORPHINE | 9064      | 9                            | 437.37      | 48.60     |
| METHADONE     | 9250B     | 10                           | 109,676.25  | 10,967.62 |

**STATE: MA - MASSACHUSETTS****BUSINESS ACTIVITY: A - PHARMACIES**

| DRUG NAME                        | DRUG CODE | NUMBER OF REGISTRANT SOLD TO | TOTAL GRAMS | AVG GRAMS |
|----------------------------------|-----------|------------------------------|-------------|-----------|
| AMPHETAMINE                      | 1100      | 1,265                        | 704,635.48  | 557.02    |
| METHAMPHETAMINE                  | 1105      | 40                           | 134.61      | 3.37      |
| LISDEXAMFETAMINE                 | 1205      | 1,199                        | 146,648.36  | 122.31    |
| METHYLPHENIDATE (DL;D;L;ISOMERS) | 1724      | 1,255                        | 535,484.66  | 426.68    |
| CODEINE                          | 9050      | 1,199                        | 152,677.79  | 127.34    |
| BUPRENORPHINE                    | 9064      | 1,250                        | 164,947.20  | 131.96    |
| OXYCODONE                        | 9143      | 1,268                        | 762,766.91  | 601.55    |
| HYDROMORPHONE                    | 9150      | 1,168                        | 18,259.23   | 15.63     |
| HYDROCODONE                      | 9193      | 1,254                        | 97,843.02   | 78.02     |
| MEPERIDINE (PETHIDINE)           | 9230      | 166                          | 5,105.57    | 30.76     |
| METHADONE                        | 9250B     | 1,040                        | 56,697.00   | 54.52     |
| MORPHINE                         | 9300      | 1,188                        | 204,749.94  | 172.35    |
| OXYMORPHONE                      | 9652      | 184                          | 3,718.59    | 20.21     |
| TAPENTADOL                       | 9780      | 471                          | 63,273.50   | 134.34    |
| FENTANYL BASE                    | 9801      | 1,111                        | 3,603.34    | 3.24      |

**BUSINESS ACTIVITY: B - HOSPITALS**

| DRUG NAME                        | DRUG CODE | NUMBER OF REGISTRANT SOLD TO | TOTAL GRAMS | AVG GRAMS |
|----------------------------------|-----------|------------------------------|-------------|-----------|
| AMPHETAMINE                      | 1100      | 144                          | 27,491.64   | 190.91    |
| METHAMPHETAMINE                  | 1105      | 1                            | 0.80        | 0.80      |
| LISDEXAMFETAMINE                 | 1205      | 72                           | 3,806.79    | 52.87     |
| METHYLPHENIDATE (DL;D;L;ISOMERS) | 1724      | 157                          | 26,146.19   | 166.54    |
| CODEINE                          | 9050      | 160                          | 7,145.63    | 44.66     |

|                        |       |     |           |        |
|------------------------|-------|-----|-----------|--------|
| BUPRENORPHINE          | 9064  | 159 | 9,725.63  | 61.17  |
| OXYCODONE              | 9143  | 196 | 61,845.73 | 315.54 |
| HYDROMORPHONE          | 9150  | 171 | 7,467.80  | 43.67  |
| HYDROCODONE            | 9193  | 173 | 3,558.25  | 20.57  |
| MEPERIDINE (PETHIDINE) | 9230  | 107 | 1,536.50  | 14.36  |
| METHADONE              | 9250B | 149 | 11,464.43 | 76.94  |
| MORPHINE               | 9300  | 187 | 26,066.45 | 139.39 |
| OXYMORPHONE            | 9652  | 16  | 404.48    | 25.28  |
| TAPENTADOL             | 9780  | 17  | 2,784.00  | 163.76 |
| FENTANYL BASE          | 9801  | 183 | 644.44    | 3.52   |

**BUSINESS ACTIVITY: C - PRACTITIONERS**

| DRUG NAME              | DRUG CODE | NUMBER OF REGISTRANT SOLD TO | TOTAL GRAMS | AVG GRAMS |
|------------------------|-----------|------------------------------|-------------|-----------|
| METHAMPHETAMINE        | 1105      | 1                            | 4.02        | 4.02      |
| CODEINE                | 9050      | 26                           | 1,144.27    | 44.01     |
| BUPRENORPHINE          | 9064      | 578                          | 58.43       | 0.10      |
| OXYCODONE              | 9143      | 21                           | 30.21       | 1.44      |
| HYDROMORPHONE          | 9150      | 237                          | 167.06      | 0.70      |
| HYDROCODONE            | 9193      | 131                          | 433.66      | 3.31      |
| MEPERIDINE (PETHIDINE) | 9230      | 26                           | 325.72      | 12.53     |
| METHADONE              | 9250B     | 29                           | 59.21       | 2.04      |
| MORPHINE               | 9300      | 125                          | 171.19      | 1.37      |
| FENTANYL BASE          | 9801      | 301                          | 27.35       | 0.09      |

**BUSINESS ACTIVITY: D - TEACHING INSTITUTIONS**

| DRUG NAME     | DRUG CODE | NUMBER OF REGISTRANT SOLD TO | TOTAL GRAMS | AVG GRAMS |
|---------------|-----------|------------------------------|-------------|-----------|
| BUPRENORPHINE | 9064      | 1                            | 0.01        | 0.01      |

**BUSINESS ACTIVITY: M - MID-LEVEL PRACTITIONERS**

| DRUG NAME | DRUG CODE | NUMBER OF REGISTRANT SOLD TO | TOTAL GRAMS | AVG GRAMS |
|-----------|-----------|------------------------------|-------------|-----------|
| CODEINE   | 9050      | 1                            | 0.43        | 0.43      |

**BUSINESS ACTIVITY: NTP - NARCOTIC TREATMENT PROGRAMS**

| DRUG NAME     | DRUG CODE | NUMBER OF REGISTRANT SOLD TO | TOTAL GRAMS | AVG GRAMS |
|---------------|-----------|------------------------------|-------------|-----------|
| BUPRENORPHINE | 9064      | 37                           | 680.24      | 18.38     |
| METHADONE     | 9250B     | 78                           | 450,574.57  | 5,776.60  |

**STATE: MD - MARYLAND****BUSINESS ACTIVITY: A - PHARMACIES**

| DRUG NAME                        | DRUG CODE | NUMBER OF REGISTRANT SOLD TO | TOTAL GRAMS | AVG GRAMS |
|----------------------------------|-----------|------------------------------|-------------|-----------|
| AMPHETAMINE                      | 1100      | 1,334                        | 375,249.98  | 281.30    |
| METHAMPHETAMINE                  | 1105      | 39                           | 154.29      | 3.96      |
| LISDEXAMFETAMINE                 | 1205      | 1,298                        | 224,318.99  | 172.82    |
| METHYLPHENIDATE (DL;D;L;ISOMERS) | 1724      | 1,322                        | 374,557.60  | 283.33    |
| CODEINE                          | 9050      | 1,341                        | 185,094.50  | 138.03    |

|                        |       |       |              |        |
|------------------------|-------|-------|--------------|--------|
| BUPRENORPHINE          | 9064  | 1,288 | 106,477.03   | 82.67  |
| OXYCODONE              | 9143  | 1,365 | 1,044,758.61 | 765.39 |
| HYDROMORPHONE          | 9150  | 1,215 | 21,280.10    | 17.51  |
| HYDROCODONE            | 9193  | 1,331 | 108,934.26   | 81.84  |
| MEPERIDINE (PETHIDINE) | 9230  | 283   | 5,606.47     | 19.81  |
| METHADONE              | 9250B | 994   | 41,629.49    | 41.88  |
| MORPHINE               | 9300  | 1,258 | 224,612.70   | 178.55 |
| OXYMORPHONE            | 9652  | 757   | 23,188.71    | 30.63  |
| TAPENTADOL             | 9780  | 816   | 100,455.00   | 123.11 |
| FENTANYL BASE          | 9801  | 1,169 | 3,558.97     | 3.04   |

**BUSINESS ACTIVITY: B - HOSPITALS**

| DRUG NAME                        | DRUG CODE | NUMBER OF REGISTRANT SOLD TO | TOTAL GRAMS | AVG GRAMS |
|----------------------------------|-----------|------------------------------|-------------|-----------|
| AMPHETAMINE                      | 1100      | 53                           | 10,237.12   | 193.15    |
| LISDEXAMFETAMINE                 | 1205      | 25                           | 2,115.50    | 84.62     |
| METHYLPHENIDATE (DL;D;L;ISOMERS) | 1724      | 67                           | 14,026.67   | 209.35    |
| CODEINE                          | 9050      | 84                           | 4,346.01    | 51.74     |
| BUPRENORPHINE                    | 9064      | 72                           | 2,051.90    | 28.50     |
| OXYCODONE                        | 9143      | 133                          | 43,986.07   | 330.72    |
| HYDROMORPHONE                    | 9150      | 130                          | 4,400.75    | 33.85     |
| HYDROCODONE                      | 9193      | 116                          | 3,569.96    | 30.78     |
| MEPERIDINE (PETHIDINE)           | 9230      | 86                           | 1,530.57    | 17.80     |
| METHADONE                        | 9250B     | 64                           | 5,765.45    | 90.09     |
| MORPHINE                         | 9300      | 120                          | 17,968.53   | 149.74    |
| OXYMORPHONE                      | 9652      | 6                            | 109.37      | 18.23     |
| TAPENTADOL                       | 9780      | 16                           | 1,914.50    | 119.66    |
| FENTANYL BASE                    | 9801      | 203                          | 460.12      | 2.27      |

**BUSINESS ACTIVITY: C - PRACTITIONERS**

| DRUG NAME              | DRUG CODE | NUMBER OF REGISTRANT SOLD TO | TOTAL GRAMS | AVG GRAMS |
|------------------------|-----------|------------------------------|-------------|-----------|
| AMPHETAMINE            | 1100      | 2                            | 4.78        | 2.39      |
| CODEINE                | 9050      | 178                          | 6,649.25    | 37.36     |
| BUPRENORPHINE          | 9064      | 593                          | 252.90      | 0.43      |
| OXYCODONE              | 9143      | 62                           | 2,616.50    | 42.20     |
| HYDROMORPHONE          | 9150      | 253                          | 245.12      | 0.97      |
| HYDROCODONE            | 9193      | 249                          | 1,328.28    | 5.33      |
| MEPERIDINE (PETHIDINE) | 9230      | 62                           | 557.00      | 8.98      |
| METHADONE              | 9250B     | 18                           | 88.46       | 4.91      |
| MORPHINE               | 9300      | 165                          | 984.06      | 5.96      |
| OXYMORPHONE            | 9652      | 12                           | 144.95      | 12.08     |
| TAPENTADOL             | 9780      | 7                            | 273.00      | 39.00     |
| FENTANYL BASE          | 9801      | 367                          | 51.62       | 0.14      |

**BUSINESS ACTIVITY: D - TEACHING INSTITUTIONS**

| DRUG NAME              | DRUG CODE | NUMBER OF REGISTRANT SOLD TO | TOTAL GRAMS | AVG GRAMS |
|------------------------|-----------|------------------------------|-------------|-----------|
| MEPERIDINE (PETHIDINE) | 9230      | 1                            | 4.36        | 4.36      |
| MORPHINE               | 9300      | 1                            | 0.08        | 0.08      |
| FENTANYL BASE          | 9801      | 1                            | 0.02        | 0.02      |

**BUSINESS ACTIVITY: M - MID-LEVEL PRACTITIONERS**

| DRUG NAME     | DRUG CODE | NUMBER OF REGISTRANT SOLD TO | TOTAL GRAMS | AVG GRAMS |
|---------------|-----------|------------------------------|-------------|-----------|
| CODEINE       | 9050      | 6                            | 6.93        | 1.16      |
| BUPRENORPHINE | 9064      | 3                            | 2.58        | 0.86      |
| OXYCODONE     | 9143      | 1                            | 0.90        | 0.90      |

**BUSINESS ACTIVITY: NTP - NARCOTIC TREATMENT PROGRAMS**

| DRUG NAME     | DRUG CODE | NUMBER OF REGISTRANT SOLD TO | TOTAL GRAMS | AVG GRAMS |
|---------------|-----------|------------------------------|-------------|-----------|
| BUPRENORPHINE | 9064      | 52                           | 7,199.09    | 138.44    |
| METHADONE     | 9250B     | 84                           | 668,653.44  | 7,960.16  |

**STATE: ME - MAINE****BUSINESS ACTIVITY: A - PHARMACIES**

| DRUG NAME                        | DRUG CODE | NUMBER OF REGISTRANT SOLD TO | TOTAL GRAMS | AVG GRAMS |
|----------------------------------|-----------|------------------------------|-------------|-----------|
| AMPHETAMINE                      | 1100      | 379                          | 94,855.24   | 250.28    |
| METHAMPHETAMINE                  | 1105      | 10                           | 53.04       | 5.30      |
| LISDEXAMFETAMINE                 | 1205      | 375                          | 66,592.50   | 177.58    |
| METHYLPHENIDATE (DL;D;L;ISOMERS) | 1724      | 381                          | 136,275.89  | 357.68    |
| CODEINE                          | 9050      | 341                          | 34,290.99   | 100.56    |
| BUPRENORPHINE                    | 9064      | 384                          | 43,235.25   | 112.59    |
| OXYCODONE                        | 9143      | 382                          | 171,544.25  | 449.07    |
| HYDROMORPHONE                    | 9150      | 354                          | 4,816.31    | 13.61     |
| HYDROCODONE                      | 9193      | 383                          | 57,052.90   | 148.96    |
| MEPERIDINE (PETHIDINE)           | 9230      | 53                           | 1,137.20    | 21.46     |
| METHADONE                        | 9250B     | 338                          | 14,636.68   | 43.30     |
| MORPHINE                         | 9300      | 368                          | 51,741.73   | 140.60    |
| OXYMORPHONE                      | 9652      | 133                          | 1,787.90    | 13.44     |
| TAPENTADOL                       | 9780      | 102                          | 4,651.00    | 45.60     |
| FENTANYL BASE                    | 9801      | 359                          | 970.29      | 2.70      |

**BUSINESS ACTIVITY: B - HOSPITALS**

| DRUG NAME                        | DRUG CODE | NUMBER OF REGISTRANT SOLD TO | TOTAL GRAMS | AVG GRAMS |
|----------------------------------|-----------|------------------------------|-------------|-----------|
| AMPHETAMINE                      | 1100      | 24                           | 1,552.07    | 64.67     |
| LISDEXAMFETAMINE                 | 1205      | 13                           | 395.42      | 30.42     |
| METHYLPHENIDATE (DL;D;L;ISOMERS) | 1724      | 38                           | 2,229.84    | 58.68     |
| CODEINE                          | 9050      | 38                           | 851.57      | 22.41     |
| BUPRENORPHINE                    | 9064      | 41                           | 1,116.27    | 27.23     |
| OXYCODONE                        | 9143      | 48                           | 8,763.51    | 182.57    |

|                        |       |    |          |        |
|------------------------|-------|----|----------|--------|
| HYDROMORPHONE          | 9150  | 41 | 958.91   | 23.39  |
| HYDROCODONE            | 9193  | 45 | 3,238.50 | 71.97  |
| MEPERIDINE (PETHIDINE) | 9230  | 33 | 130.94   | 3.97   |
| METHADONE              | 9250B | 37 | 1,115.23 | 30.14  |
| MORPHINE               | 9300  | 43 | 4,645.62 | 108.04 |
| OXYMORPHONE            | 9652  | 1  | 0.27     | 0.27   |
| TAPENTADOL             | 9780  | 1  | 45.00    | 45.00  |
| FENTANYL BASE          | 9801  | 43 | 125.36   | 2.92   |

**BUSINESS ACTIVITY: C - PRACTITIONERS**

| DRUG NAME              | DRUG CODE | NUMBER OF REGISTRANT SOLD TO | TOTAL GRAMS | AVG GRAMS |
|------------------------|-----------|------------------------------|-------------|-----------|
| CODEINE                | 9050      | 6                            | 277.24      | 46.21     |
| BUPRENORPHINE          | 9064      | 161                          | 10.49       | 0.07      |
| OXYCODONE              | 9143      | 3                            | 20.62       | 6.87      |
| HYDROMORPHONE          | 9150      | 76                           | 46.09       | 0.61      |
| HYDROCODONE            | 9193      | 52                           | 93.78       | 1.80      |
| MEPERIDINE (PETHIDINE) | 9230      | 4                            | 45.21       | 11.30     |
| METHADONE              | 9250B     | 1                            | 0.27        | 0.27      |
| MORPHINE               | 9300      | 38                           | 64.94       | 1.71      |
| FENTANYL BASE          | 9801      | 48                           | 6.10        | 0.13      |

**BUSINESS ACTIVITY: D - TEACHING INSTITUTIONS**

| DRUG NAME     | DRUG CODE | NUMBER OF REGISTRANT SOLD TO | TOTAL GRAMS | AVG GRAMS |
|---------------|-----------|------------------------------|-------------|-----------|
| BUPRENORPHINE | 9064      | 1                            | 0.01        | 0.01      |

**BUSINESS ACTIVITY: M - MID-LEVEL PRACTITIONERS**

| DRUG NAME | DRUG CODE | NUMBER OF REGISTRANT SOLD TO | TOTAL GRAMS | AVG GRAMS |
|-----------|-----------|------------------------------|-------------|-----------|
| CODEINE   | 9050      | 3                            | 12.44       | 4.15      |

**BUSINESS ACTIVITY: NTP - NARCOTIC TREATMENT PROGRAMS**

| DRUG NAME     | DRUG CODE | NUMBER OF REGISTRANT SOLD TO | TOTAL GRAMS | AVG GRAMS |
|---------------|-----------|------------------------------|-------------|-----------|
| BUPRENORPHINE | 9064      | 5                            | 516.66      | 103.33    |
| METHADONE     | 9250B     | 10                           | 90,566.05   | 9,056.60  |

**STATE: MI - MICHIGAN****BUSINESS ACTIVITY: A - PHARMACIES**

| DRUG NAME                        | DRUG CODE | NUMBER OF REGISTRANT SOLD TO | TOTAL GRAMS | AVG GRAMS |
|----------------------------------|-----------|------------------------------|-------------|-----------|
| AMPHETAMINE                      | 1100      | 2,376                        | 959,614.12  | 403.88    |
| METHAMPHETAMINE                  | 1105      | 29                           | 100.45      | 3.46      |
| LISDEXAMFETAMINE                 | 1205      | 2,152                        | 240,905.83  | 111.95    |
| METHYLPHENIDATE (DL;D;L;ISOMERS) | 1724      | 2,298                        | 694,758.73  | 302.33    |
| CODEINE                          | 9050      | 2,420                        | 788,648.21  | 325.89    |
| BUPRENORPHINE                    | 9064      | 2,192                        | 118,762.03  | 54.18     |
| OXYCODONE                        | 9143      | 2,418                        | 894,155.00  | 369.79    |
| HYDROMORPHONE                    | 9150      | 1,837                        | 22,766.01   | 12.39     |

|                        |       |       |              |        |
|------------------------|-------|-------|--------------|--------|
| HYDROCODONE            | 9193  | 2,456 | 1,166,285.44 | 474.87 |
| MEPERIDINE (PETHIDINE) | 9230  | 217   | 5,897.77     | 27.18  |
| METHADONE              | 9250B | 1,819 | 103,856.48   | 57.10  |
| MORPHINE               | 9300  | 2,259 | 550,960.91   | 243.90 |
| OXYMORPHONE            | 9652  | 831   | 46,343.44    | 55.77  |
| TAPENTADOL             | 9780  | 841   | 66,759.50    | 79.38  |
| FENTANYL BASE          | 9801  | 2,106 | 8,375.77     | 3.98   |

**BUSINESS ACTIVITY: B - HOSPITALS**

| DRUG NAME                        | DRUG CODE | NUMBER OF REGISTRANT SOLD TO | TOTAL GRAMS | AVG GRAMS |
|----------------------------------|-----------|------------------------------|-------------|-----------|
| AMPHETAMINE                      | 1100      | 112                          | 19,196.96   | 171.40    |
| METHAMPHETAMINE                  | 1105      | 1                            | 0.80        | 0.80      |
| LISDEXAMFETAMINE                 | 1205      | 61                           | 3,891.19    | 63.79     |
| METHYLPHENIDATE (DL;D;L;ISOMERS) | 1724      | 154                          | 17,291.35   | 112.28    |
| CODEINE                          | 9050      | 188                          | 17,946.68   | 95.46     |
| BUPRENORPHINE                    | 9064      | 125                          | 2,802.41    | 22.42     |
| OXYCODONE                        | 9143      | 192                          | 50,964.54   | 265.44    |
| HYDROMORPHONE                    | 9150      | 184                          | 4,884.48    | 26.55     |
| HYDROCODONE                      | 9193      | 203                          | 57,384.53   | 282.68    |
| MEPERIDINE (PETHIDINE)           | 9230      | 119                          | 2,670.91    | 22.44     |
| METHADONE                        | 9250B     | 162                          | 7,195.09    | 44.41     |
| MORPHINE                         | 9300      | 197                          | 45,992.82   | 233.47    |
| OXYMORPHONE                      | 9652      | 17                           | 313.31      | 18.43     |
| TAPENTADOL                       | 9780      | 15                           | 771.00      | 51.40     |
| FENTANYL BASE                    | 9801      | 190                          | 962.07      | 5.06      |

**BUSINESS ACTIVITY: C - PRACTITIONERS**

| DRUG NAME              | DRUG CODE | NUMBER OF REGISTRANT SOLD TO | TOTAL GRAMS | AVG GRAMS |
|------------------------|-----------|------------------------------|-------------|-----------|
| AMPHETAMINE            | 1100      | 5                            | 16.41       | 3.28      |
| LISDEXAMFETAMINE       | 1205      | 2                            | 6.56        | 3.28      |
| CODEINE                | 9050      | 136                          | 2,450.04    | 18.02     |
| BUPRENORPHINE          | 9064      | 773                          | 374.46      | 0.48      |
| OXYCODONE              | 9143      | 40                           | 211.66      | 5.29      |
| HYDROMORPHONE          | 9150      | 367                          | 247.86      | 0.68      |
| HYDROCODONE            | 9193      | 283                          | 1,159.51    | 4.10      |
| MEPERIDINE (PETHIDINE) | 9230      | 109                          | 790.89      | 7.26      |
| METHADONE              | 9250B     | 8                            | 30.32       | 3.79      |
| MORPHINE               | 9300      | 292                          | 569.21      | 1.95      |
| FENTANYL BASE          | 9801      | 537                          | 66.59       | 0.12      |

**BUSINESS ACTIVITY: D - TEACHING INSTITUTIONS**

| DRUG NAME | DRUG CODE | NUMBER OF REGISTRANT SOLD TO | TOTAL GRAMS | AVG GRAMS |
|-----------|-----------|------------------------------|-------------|-----------|
| CODEINE   | 9050      | 1                            | 611.21      | 611.21    |

|                        |       |   |       |       |
|------------------------|-------|---|-------|-------|
| BUPRENORPHINE          | 9064  | 1 | 1.56  | 1.56  |
| HYDROMORPHONE          | 9150  | 1 | 7.54  | 7.54  |
| HYDROCODONE            | 9193  | 1 | 24.18 | 24.18 |
| MEPERIDINE (PETHIDINE) | 9230  | 1 | 1.09  | 1.09  |
| METHADONE              | 9250B | 1 | 25.40 | 25.40 |
| MORPHINE               | 9300  | 1 | 4.85  | 4.85  |
| FENTANYL BASE          | 9801  | 2 | 1.51  | 0.76  |

**BUSINESS ACTIVITY: M - MID-LEVEL PRACTITIONERS**

| DRUG NAME     | DRUG CODE | NUMBER OF REGISTRANT SOLD TO | TOTAL GRAMS | AVG GRAMS |
|---------------|-----------|------------------------------|-------------|-----------|
| CODEINE       | 9050      | 2                            | 338.58      | 169.29    |
| BUPRENORPHINE | 9064      | 2                            | 0.64        | 0.32      |

**BUSINESS ACTIVITY: NTP - NARCOTIC TREATMENT PROGRAMS**

| DRUG NAME     | DRUG CODE | NUMBER OF REGISTRANT SOLD TO | TOTAL GRAMS | AVG GRAMS |
|---------------|-----------|------------------------------|-------------|-----------|
| BUPRENORPHINE | 9064      | 11                           | 215.22      | 19.57     |
| METHADONE     | 9250B     | 42                           | 378,667.05  | 9,015.88  |

**STATE: MN - MINNESOTA****BUSINESS ACTIVITY: A - PHARMACIES**

| DRUG NAME                        | DRUG CODE | NUMBER OF REGISTRANT SOLD TO | TOTAL GRAMS | AVG GRAMS |
|----------------------------------|-----------|------------------------------|-------------|-----------|
| AMPHETAMINE                      | 1100      | 1,027                        | 439,492.69  | 427.94    |
| METHAMPHETAMINE                  | 1105      | 49                           | 233.04      | 4.76      |
| LISDEXAMFETAMINE                 | 1205      | 1,005                        | 122,699.99  | 122.09    |
| METHYLPHENIDATE (DL;D;L;ISOMERS) | 1724      | 1,028                        | 391,173.73  | 380.52    |
| CODEINE                          | 9050      | 1,023                        | 122,931.81  | 120.17    |
| BUPRENORPHINE                    | 9064      | 926                          | 32,584.60   | 35.19     |
| OXYCODONE                        | 9143      | 1,040                        | 450,637.78  | 433.31    |
| HYDROMORPHONE                    | 9150      | 979                          | 15,891.57   | 16.23     |
| HYDROCODONE                      | 9193      | 1,043                        | 138,540.20  | 132.83    |
| MEPERIDINE (PETHIDINE)           | 9230      | 89                           | 1,094.39    | 12.30     |
| METHADONE                        | 9250B     | 837                          | 25,493.53   | 30.46     |
| MORPHINE                         | 9300      | 1,016                        | 138,289.02  | 136.11    |
| OXYMORPHONE                      | 9652      | 108                          | 840.80      | 7.79      |
| TAPENTADOL                       | 9780      | 269                          | 14,798.00   | 55.01     |
| FENTANYL BASE                    | 9801      | 963                          | 2,766.26    | 2.87      |

**BUSINESS ACTIVITY: B - HOSPITALS**

| DRUG NAME                        | DRUG CODE | NUMBER OF REGISTRANT SOLD TO | TOTAL GRAMS | AVG GRAMS |
|----------------------------------|-----------|------------------------------|-------------|-----------|
| AMPHETAMINE                      | 1100      | 75                           | 7,218.12    | 96.24     |
| METHAMPHETAMINE                  | 1105      | 3                            | 67.91       | 22.64     |
| LISDEXAMFETAMINE                 | 1205      | 46                           | 1,561.45    | 33.94     |
| METHYLPHENIDATE (DL;D;L;ISOMERS) | 1724      | 106                          | 7,510.23    | 70.85     |
| CODEINE                          | 9050      | 123                          | 4,553.83    | 37.02     |

|                        |       |     |           |        |
|------------------------|-------|-----|-----------|--------|
| BUPRENORPHINE          | 9064  | 82  | 1,347.39  | 16.43  |
| OXYCODONE              | 9143  | 152 | 30,603.81 | 201.34 |
| HYDROMORPHONE          | 9150  | 154 | 4,199.95  | 27.27  |
| HYDROCODONE            | 9193  | 150 | 10,130.24 | 67.53  |
| MEPERIDINE (PETHIDINE) | 9230  | 96  | 758.68    | 7.90   |
| METHADONE              | 9250B | 98  | 2,860.65  | 29.19  |
| MORPHINE               | 9300  | 156 | 16,474.29 | 105.60 |
| OXYMORPHONE            | 9652  | 6   | 24.62     | 4.10   |
| TAPENTADOL             | 9780  | 13  | 152.50    | 11.73  |
| FENTANYL BASE          | 9801  | 150 | 420.84    | 2.81   |

**BUSINESS ACTIVITY: C - PRACTITIONERS**

| DRUG NAME                        | DRUG CODE | NUMBER OF REGISTRANT SOLD TO | TOTAL GRAMS | AVG GRAMS |
|----------------------------------|-----------|------------------------------|-------------|-----------|
| AMPHETAMINE                      | 1100      | 1                            | 15.21       | 15.21     |
| METHYLPHENIDATE (DL;D;L;ISOMERS) | 1724      | 2                            | 19.66       | 9.83      |
| CODEINE                          | 9050      | 46                           | 1,723.08    | 37.46     |
| BUPRENORPHINE                    | 9064      | 562                          | 40.71       | 0.07      |
| OXYCODONE                        | 9143      | 56                           | 286.70      | 5.12      |
| HYDROMORPHONE                    | 9150      | 297                          | 143.47      | 0.48      |
| HYDROCODONE                      | 9193      | 264                          | 549.32      | 2.08      |
| MEPERIDINE (PETHIDINE)           | 9230      | 45                           | 298.38      | 6.63      |
| METHADONE                        | 9250B     | 4                            | 6.53        | 1.63      |
| MORPHINE                         | 9300      | 219                          | 195.64      | 0.89      |
| FENTANYL BASE                    | 9801      | 374                          | 35.88       | 0.10      |

**BUSINESS ACTIVITY: D - TEACHING INSTITUTIONS**

| DRUG NAME     | DRUG CODE | NUMBER OF REGISTRANT SOLD TO | TOTAL GRAMS | AVG GRAMS |
|---------------|-----------|------------------------------|-------------|-----------|
| BUPRENORPHINE | 9064      | 1                            | 0.00        | 0.00      |

**BUSINESS ACTIVITY: M - MID-LEVEL PRACTITIONERS**

| DRUG NAME     | DRUG CODE | NUMBER OF REGISTRANT SOLD TO | TOTAL GRAMS | AVG GRAMS |
|---------------|-----------|------------------------------|-------------|-----------|
| CODEINE       | 9050      | 3                            | 10.83       | 3.61      |
| FENTANYL BASE | 9801      | 1                            | 0.01        | 0.01      |

**BUSINESS ACTIVITY: NTP - NARCOTIC TREATMENT PROGRAMS**

| DRUG NAME     | DRUG CODE | NUMBER OF REGISTRANT SOLD TO | TOTAL GRAMS | AVG GRAMS |
|---------------|-----------|------------------------------|-------------|-----------|
| BUPRENORPHINE | 9064      | 14                           | 2,240.19    | 160.01    |
| METHADONE     | 9250B     | 15                           | 190,731.87  | 12,715.46 |

**STATE: MO - MISSOURI****BUSINESS ACTIVITY: A - PHARMACIES**

| DRUG NAME        | DRUG CODE | NUMBER OF REGISTRANT SOLD TO | TOTAL GRAMS | AVG GRAMS |
|------------------|-----------|------------------------------|-------------|-----------|
| AMPHETAMINE      | 1100      | 1,319                        | 560,171.60  | 424.69    |
| METHAMPHETAMINE  | 1105      | 30                           | 172.36      | 5.75      |
| LISDEXAMFETAMINE | 1205      | 1,277                        | 265,255.40  | 207.72    |



|                                  |       |       |            |        |
|----------------------------------|-------|-------|------------|--------|
| METHYLPHENIDATE (DL;D;L;ISOMERS) | 1724  | 1,323 | 506,083.09 | 382.53 |
| CODEINE                          | 9050  | 1,312 | 233,745.86 | 178.16 |
| BUPRENORPHINE                    | 9064  | 1,259 | 51,105.45  | 40.59  |
| OXYCODONE                        | 9143  | 1,334 | 908,874.82 | 681.32 |
| HYDROMORPHONE                    | 9150  | 1,148 | 17,222.63  | 15.00  |
| HYDROCODONE                      | 9193  | 1,334 | 562,527.62 | 421.68 |
| MEPERIDINE (PETHIDINE)           | 9230  | 422   | 8,324.46   | 19.73  |
| METHADONE                        | 9250B | 1,105 | 39,680.77  | 35.91  |
| MORPHINE                         | 9300  | 1,303 | 293,622.40 | 225.34 |
| OXYMORPHONE                      | 9652  | 457   | 6,881.44   | 15.06  |
| TAPENTADOL                       | 9780  | 793   | 79,994.50  | 100.88 |
| FENTANYL BASE                    | 9801  | 1,266 | 6,131.77   | 4.84   |

**BUSINESS ACTIVITY: B - HOSPITALS**

| DRUG NAME                        | DRUG CODE | NUMBER OF REGISTRANT SOLD TO | TOTAL GRAMS | AVG GRAMS |
|----------------------------------|-----------|------------------------------|-------------|-----------|
| AMPHETAMINE                      | 1100      | 100                          | 10,079.30   | 100.79    |
| LISDEXAMFETAMINE                 | 1205      | 46                           | 3,027.91    | 65.82     |
| METHYLPHENIDATE (DL;D;L;ISOMERS) | 1724      | 125                          | 9,262.19    | 74.10     |
| CODEINE                          | 9050      | 168                          | 5,915.60    | 35.21     |
| BUPRENORPHINE                    | 9064      | 98                           | 1,291.89    | 13.18     |
| OXYCODONE                        | 9143      | 230                          | 45,906.22   | 199.59    |
| HYDROMORPHONE                    | 9150      | 187                          | 2,882.75    | 15.42     |
| HYDROCODONE                      | 9193      | 241                          | 23,325.19   | 96.79     |
| MEPERIDINE (PETHIDINE)           | 9230      | 159                          | 2,689.56    | 16.92     |
| METHADONE                        | 9250B     | 119                          | 3,453.41    | 29.02     |
| MORPHINE                         | 9300      | 231                          | 27,120.34   | 117.40    |
| OXYMORPHONE                      | 9652      | 14                           | 30.78       | 2.20      |
| TAPENTADOL                       | 9780      | 29                           | 1,255.50    | 43.29     |
| FENTANYL BASE                    | 9801      | 261                          | 626.80      | 2.40      |

**BUSINESS ACTIVITY: C - PRACTITIONERS**

| DRUG NAME              | DRUG CODE | NUMBER OF REGISTRANT SOLD TO | TOTAL GRAMS | AVG GRAMS |
|------------------------|-----------|------------------------------|-------------|-----------|
| AMPHETAMINE            | 1100      | 1                            | 1.90        | 1.90      |
| CODEINE                | 9050      | 52                           | 3,226.41    | 62.05     |
| BUPRENORPHINE          | 9064      | 453                          | 54.65       | 0.12      |
| OXYCODONE              | 9143      | 10                           | 125.73      | 12.57     |
| HYDROMORPHONE          | 9150      | 133                          | 120.98      | 0.91      |
| HYDROCODONE            | 9193      | 220                          | 1,565.55    | 7.12      |
| MEPERIDINE (PETHIDINE) | 9230      | 17                           | 300.67      | 17.69     |
| METHADONE              | 9250B     | 7                            | 13.15       | 1.88      |
| MORPHINE               | 9300      | 123                          | 123.97      | 1.01      |
| FENTANYL BASE          | 9801      | 153                          | 14.51       | 0.09      |

**BUSINESS ACTIVITY: D - TEACHING INSTITUTIONS**

| DRUG NAME     | DRUG CODE | NUMBER OF REGISTRANT SOLD TO | TOTAL GRAMS | AVG GRAMS |
|---------------|-----------|------------------------------|-------------|-----------|
| CODEINE       | 9050      | 1                            | 192.28      | 192.28    |
| BUPRENORPHINE | 9064      | 2                            | 1.22        | 0.61      |
| HYDROMORPHONE | 9150      | 2                            | 4.79        | 2.39      |
| HYDROCODONE   | 9193      | 2                            | 14.24       | 7.12      |
| MORPHINE      | 9300      | 2                            | 14.39       | 7.20      |
| FENTANYL BASE | 9801      | 3                            | 1.89        | 0.63      |

**BUSINESS ACTIVITY: M - MID-LEVEL PRACTITIONERS**

| DRUG NAME     | DRUG CODE | NUMBER OF REGISTRANT SOLD TO | TOTAL GRAMS | AVG GRAMS |
|---------------|-----------|------------------------------|-------------|-----------|
| HYDROMORPHONE | 9150      | 5                            | 0.16        | 0.03      |
| MORPHINE      | 9300      | 44                           | 21.73       | 0.49      |
| FENTANYL BASE | 9801      | 63                           | 0.69        | 0.01      |

**BUSINESS ACTIVITY: NTP - NARCOTIC TREATMENT PROGRAMS**

| DRUG NAME     | DRUG CODE | NUMBER OF REGISTRANT SOLD TO | TOTAL GRAMS | AVG GRAMS |
|---------------|-----------|------------------------------|-------------|-----------|
| BUPRENORPHINE | 9064      | 16                           | 1,186.57    | 74.16     |
| METHADONE     | 9250B     | 16                           | 103,920.78  | 6,495.05  |

**STATE: MS - MISSISSIPPI****BUSINESS ACTIVITY: A - PHARMACIES**

| DRUG NAME                        | DRUG CODE | NUMBER OF REGISTRANT SOLD TO | TOTAL GRAMS | AVG GRAMS |
|----------------------------------|-----------|------------------------------|-------------|-----------|
| AMPHETAMINE                      | 1100      | 781                          | 240,506.87  | 307.95    |
| METHAMPHETAMINE                  | 1105      | 6                            | 30.94       | 5.16      |
| LISDEXAMFETAMINE                 | 1205      | 758                          | 145,611.83  | 192.10    |
| METHYLPHENIDATE (DL;D;L;ISOMERS) | 1724      | 770                          | 159,790.15  | 207.52    |
| CODEINE                          | 9050      | 759                          | 87,988.78   | 115.93    |
| BUPRENORPHINE                    | 9064      | 710                          | 41,557.25   | 58.53     |
| OXYCODONE                        | 9143      | 792                          | 344,134.51  | 434.51    |
| HYDROMORPHONE                    | 9150      | 573                          | 18,997.44   | 33.15     |
| HYDROCODONE                      | 9193      | 800                          | 346,071.35  | 432.59    |
| MEPERIDINE (PETHIDINE)           | 9230      | 450                          | 8,023.68    | 17.83     |
| METHADONE                        | 9250B     | 429                          | 8,946.50    | 20.85     |
| MORPHINE                         | 9300      | 748                          | 121,860.94  | 162.92    |
| OXYMORPHONE                      | 9652      | 222                          | 5,785.40    | 26.06     |
| TAPENTADOL                       | 9780      | 435                          | 34,749.00   | 79.88     |
| FENTANYL BASE                    | 9801      | 751                          | 3,555.25    | 4.73      |

**BUSINESS ACTIVITY: B - HOSPITALS**

| DRUG NAME                        | DRUG CODE | NUMBER OF REGISTRANT SOLD TO | TOTAL GRAMS | AVG GRAMS |
|----------------------------------|-----------|------------------------------|-------------|-----------|
| AMPHETAMINE                      | 1100      | 54                           | 6,840.40    | 126.67    |
| LISDEXAMFETAMINE                 | 1205      | 35                           | 4,012.01    | 114.63    |
| METHYLPHENIDATE (DL;D;L;ISOMERS) | 1724      | 64                           | 5,132.98    | 80.20     |

|                        |       |     |           |        |
|------------------------|-------|-----|-----------|--------|
| CODEINE                | 9050  | 111 | 3,981.98  | 35.87  |
| BUPRENORPHINE          | 9064  | 56  | 1,120.14  | 20.00  |
| OXYCODONE              | 9143  | 135 | 14,017.54 | 103.83 |
| HYDROMORPHONE          | 9150  | 123 | 1,569.01  | 12.76  |
| HYDROCODONE            | 9193  | 150 | 17,902.26 | 119.35 |
| MEPERIDINE (PETHIDINE) | 9230  | 116 | 5,017.07  | 43.25  |
| METHADONE              | 9250B | 59  | 473.41    | 8.02   |
| MORPHINE               | 9300  | 142 | 9,834.76  | 69.26  |
| OXYMORPHONE            | 9652  | 7   | 50.49     | 7.21   |
| TAPENTADOL             | 9780  | 18  | 1,237.00  | 68.72  |
| FENTANYL BASE          | 9801  | 137 | 316.88    | 2.31   |

**BUSINESS ACTIVITY: C - PRACTITIONERS**

| DRUG NAME              | DRUG CODE | NUMBER OF REGISTRANT SOLD TO | TOTAL GRAMS | AVG GRAMS |
|------------------------|-----------|------------------------------|-------------|-----------|
| CODEINE                | 9050      | 12                           | 674.08      | 56.17     |
| BUPRENORPHINE          | 9064      | 118                          | 6.32        | 0.05      |
| OXYCODONE              | 9143      | 12                           | 23.04       | 1.92      |
| HYDROMORPHONE          | 9150      | 36                           | 20.09       | 0.56      |
| HYDROCODONE            | 9193      | 40                           | 87.45       | 2.19      |
| MEPERIDINE (PETHIDINE) | 9230      | 39                           | 422.13      | 10.82     |
| METHADONE              | 9250B     | 2                            | 0.89        | 0.45      |
| MORPHINE               | 9300      | 51                           | 53.69       | 1.05      |
| FENTANYL BASE          | 9801      | 107                          | 7.60        | 0.07      |

**BUSINESS ACTIVITY: D - TEACHING INSTITUTIONS**

| DRUG NAME     | DRUG CODE | NUMBER OF REGISTRANT SOLD TO | TOTAL GRAMS | AVG GRAMS |
|---------------|-----------|------------------------------|-------------|-----------|
| BUPRENORPHINE | 9064      | 1                            | 0.01        | 0.01      |

**BUSINESS ACTIVITY: M - MID-LEVEL PRACTITIONERS**

| DRUG NAME | DRUG CODE | NUMBER OF REGISTRANT SOLD TO | TOTAL GRAMS | AVG GRAMS |
|-----------|-----------|------------------------------|-------------|-----------|
| CODEINE   | 9050      | 4                            | 2.38        | 0.60      |

**BUSINESS ACTIVITY: NTP - NARCOTIC TREATMENT PROGRAMS**

| DRUG NAME     | DRUG CODE | NUMBER OF REGISTRANT SOLD TO | TOTAL GRAMS | AVG GRAMS |
|---------------|-----------|------------------------------|-------------|-----------|
| BUPRENORPHINE | 9064      | 4                            | 176.95      | 44.24     |
| METHADONE     | 9250B     | 5                            | 19,922.76   | 3,984.55  |

**STATE: MT - MONTANA****BUSINESS ACTIVITY: A - PHARMACIES**

| DRUG NAME                        | DRUG CODE | NUMBER OF REGISTRANT SOLD TO | TOTAL GRAMS | AVG GRAMS |
|----------------------------------|-----------|------------------------------|-------------|-----------|
| AMPHETAMINE                      | 1100      | 239                          | 55,076.55   | 230.45    |
| METHAMPHETAMINE                  | 1105      | 1                            | 0.40        | 0.40      |
| LISDEXAMFETAMINE                 | 1205      | 235                          | 23,192.22   | 98.69     |
| METHYLPHENIDATE (DL;D;L;ISOMERS) | 1724      | 239                          | 62,227.15   | 260.36    |
| CODEINE                          | 9050      | 235                          | 31,526.36   | 134.15    |

|                        |       |     |            |        |
|------------------------|-------|-----|------------|--------|
| BUPRENORPHINE          | 9064  | 227 | 10,345.94  | 45.58  |
| OXYCODONE              | 9143  | 241 | 111,951.20 | 464.53 |
| HYDROMORPHONE          | 9150  | 228 | 4,775.36   | 20.94  |
| HYDROCODONE            | 9193  | 241 | 77,078.54  | 319.83 |
| MEPERIDINE (PETHIDINE) | 9230  | 88  | 1,286.01   | 14.61  |
| METHADONE              | 9250B | 194 | 5,919.68   | 30.51  |
| MORPHINE               | 9300  | 241 | 48,924.03  | 203.00 |
| OXYMORPHONE            | 9652  | 57  | 516.12     | 9.05   |
| TAPENTADOL             | 9780  | 97  | 5,934.50   | 61.18  |
| FENTANYL BASE          | 9801  | 237 | 851.71     | 3.59   |

**BUSINESS ACTIVITY: B - HOSPITALS**

| DRUG NAME                        | DRUG CODE | NUMBER OF REGISTRANT SOLD TO | TOTAL GRAMS | AVG GRAMS |
|----------------------------------|-----------|------------------------------|-------------|-----------|
| AMPHETAMINE                      | 1100      | 37                           | 4,011.29    | 108.41    |
| LISDEXAMFETAMINE                 | 1205      | 25                           | 1,446.98    | 57.88     |
| METHYLPHENIDATE (DL;D;L;ISOMERS) | 1724      | 45                           | 5,456.76    | 121.26    |
| CODEINE                          | 9050      | 58                           | 3,789.20    | 65.33     |
| BUPRENORPHINE                    | 9064      | 29                           | 877.63      | 30.26     |
| OXYCODONE                        | 9143      | 81                           | 12,897.20   | 159.22    |
| HYDROMORPHONE                    | 9150      | 69                           | 791.43      | 11.47     |
| HYDROCODONE                      | 9193      | 84                           | 13,143.14   | 156.47    |
| MEPERIDINE (PETHIDINE)           | 9230      | 50                           | 712.89      | 14.26     |
| METHADONE                        | 9250B     | 32                           | 796.55      | 24.89     |
| MORPHINE                         | 9300      | 86                           | 10,248.61   | 119.17    |
| OXYMORPHONE                      | 9652      | 2                            | 2.05        | 1.03      |
| TAPENTADOL                       | 9780      | 8                            | 193.00      | 24.13     |
| FENTANYL BASE                    | 9801      | 84                           | 201.56      | 2.40      |

**BUSINESS ACTIVITY: C - PRACTITIONERS**

| DRUG NAME              | DRUG CODE | NUMBER OF REGISTRANT SOLD TO | TOTAL GRAMS | AVG GRAMS |
|------------------------|-----------|------------------------------|-------------|-----------|
| CODEINE                | 9050      | 11                           | 221.33      | 20.12     |
| BUPRENORPHINE          | 9064      | 138                          | 6.94        | 0.05      |
| OXYCODONE              | 9143      | 2                            | 6.28        | 3.14      |
| HYDROMORPHONE          | 9150      | 63                           | 46.35       | 0.74      |
| HYDROCODONE            | 9193      | 64                           | 174.89      | 2.73      |
| MEPERIDINE (PETHIDINE) | 9230      | 7                            | 35.40       | 5.06      |
| METHADONE              | 9250B     | 2                            | 9.84        | 4.92      |
| MORPHINE               | 9300      | 52                           | 58.74       | 1.13      |
| FENTANYL BASE          | 9801      | 86                           | 7.34        | 0.09      |

**BUSINESS ACTIVITY: M - MID-LEVEL PRACTITIONERS**

| DRUG NAME | DRUG CODE | NUMBER OF REGISTRANT SOLD TO | TOTAL GRAMS | AVG GRAMS |
|-----------|-----------|------------------------------|-------------|-----------|
| MORPHINE  | 9300      | 4                            | 1.24        | 0.31      |

|               |      |   |      |      |
|---------------|------|---|------|------|
| FENTANYL BASE | 9801 | 3 | 0.02 | 0.01 |
|---------------|------|---|------|------|

**BUSINESS ACTIVITY: NTP - NARCOTIC TREATMENT PROGRAMS**

| DRUG NAME     | DRUG CODE | NUMBER OF REGISTRANT SOLD TO | TOTAL GRAMS | AVG GRAMS |
|---------------|-----------|------------------------------|-------------|-----------|
| BUPRENORPHINE | 9064      | 4                            | 929.21      | 232.30    |
| METHADONE     | 9250B     | 4                            | 25,293.63   | 6,323.41  |

**STATE: NC - NORTH CAROLINA****BUSINESS ACTIVITY: A - PHARMACIES**

| DRUG NAME                        | DRUG CODE | NUMBER OF REGISTRANT SOLD TO | TOTAL GRAMS  | AVG GRAMS |
|----------------------------------|-----------|------------------------------|--------------|-----------|
| AMPHETAMINE                      | 1100      | 2,361                        | 824,015.81   | 349.01    |
| METHAMPHETAMINE                  | 1105      | 69                           | 191.26       | 2.77      |
| LISDEXAMFETAMINE                 | 1205      | 2,318                        | 412,935.67   | 178.14    |
| METHYLPHENIDATE (DL;D;L;ISOMERS) | 1724      | 2,350                        | 690,010.25   | 293.62    |
| CODEINE                          | 9050      | 2,170                        | 155,969.26   | 71.88     |
| BUPRENORPHINE                    | 9064      | 2,264                        | 142,020.19   | 62.73     |
| OXYCODONE                        | 9143      | 2,375                        | 1,832,036.43 | 771.38    |
| HYDROMORPHONE                    | 9150      | 2,141                        | 29,333.91    | 13.70     |
| HYDROCODONE                      | 9193      | 2,382                        | 592,805.94   | 248.87    |
| MEPERIDINE (PETHIDINE)           | 9230      | 877                          | 15,385.24    | 17.54     |
| METHADONE                        | 9250B     | 2,037                        | 81,656.48    | 40.09     |
| MORPHINE                         | 9300      | 2,297                        | 378,607.69   | 164.83    |
| OXYMORPHONE                      | 9652      | 1,276                        | 39,398.70    | 30.88     |
| TAPENTADOL                       | 9780      | 1,839                        | 319,518.50   | 173.75    |
| FENTANYL BASE                    | 9801      | 2,204                        | 7,615.58     | 3.46      |

**BUSINESS ACTIVITY: B - HOSPITALS**

| DRUG NAME                        | DRUG CODE | NUMBER OF REGISTRANT SOLD TO | TOTAL GRAMS | AVG GRAMS |
|----------------------------------|-----------|------------------------------|-------------|-----------|
| AMPHETAMINE                      | 1100      | 146                          | 30,294.33   | 207.50    |
| LISDEXAMFETAMINE                 | 1205      | 84                           | 10,143.92   | 120.76    |
| METHYLPHENIDATE (DL;D;L;ISOMERS) | 1724      | 175                          | 30,997.41   | 177.13    |
| CODEINE                          | 9050      | 172                          | 6,875.73    | 39.98     |
| BUPRENORPHINE                    | 9064      | 285                          | 3,819.13    | 13.40     |
| OXYCODONE                        | 9143      | 261                          | 94,423.77   | 361.78    |
| HYDROMORPHONE                    | 9150      | 318                          | 6,924.78    | 21.78     |
| HYDROCODONE                      | 9193      | 307                          | 37,759.82   | 123.00    |
| MEPERIDINE (PETHIDINE)           | 9230      | 160                          | 2,081.69    | 13.01     |
| METHADONE                        | 9250B     | 177                          | 7,394.68    | 41.78     |
| MORPHINE                         | 9300      | 315                          | 44,310.55   | 140.67    |
| OXYMORPHONE                      | 9652      | 48                           | 496.76      | 10.35     |
| TAPENTADOL                       | 9780      | 83                           | 12,315.00   | 148.37    |
| FENTANYL BASE                    | 9801      | 340                          | 1,051.64    | 3.09      |

**BUSINESS ACTIVITY: C - PRACTITIONERS**

| DRUG NAME                        | DRUG CODE | NUMBER OF REGISTRANT SOLD TO | TOTAL GRAMS | AVG GRAMS |
|----------------------------------|-----------|------------------------------|-------------|-----------|
| AMPHETAMINE                      | 1100      | 1                            | 0.95        | 0.95      |
| METHYLPHENIDATE (DL;D;L;ISOMERS) | 1724      | 1                            | 10.90       | 10.90     |
| CODEINE                          | 9050      | 69                           | 369.26      | 5.35      |
| BUPRENORPHINE                    | 9064      | 1,003                        | 189.96      | 0.19      |
| OXYCODONE                        | 9143      | 13                           | 32.27       | 2.48      |
| HYDROMORPHONE                    | 9150      | 312                          | 132.56      | 0.42      |
| HYDROCODONE                      | 9193      | 254                          | 613.67      | 2.42      |
| MEPERIDINE (PETHIDINE)           | 9230      | 66                           | 289.23      | 4.38      |
| METHADONE                        | 9250B     | 6                            | 9.12        | 1.52      |
| MORPHINE                         | 9300      | 179                          | 186.39      | 1.04      |
| FENTANYL BASE                    | 9801      | 458                          | 30.44       | 0.07      |

**BUSINESS ACTIVITY: D - TEACHING INSTITUTIONS**

| DRUG NAME     | DRUG CODE | NUMBER OF REGISTRANT SOLD TO | TOTAL GRAMS | AVG GRAMS |
|---------------|-----------|------------------------------|-------------|-----------|
| BUPRENORPHINE | 9064      | 3                            | 0.02        | 0.01      |
| HYDROMORPHONE | 9150      | 3                            | 0.28        | 0.09      |
| HYDROCODONE   | 9193      | 1                            | 0.30        | 0.30      |
| MORPHINE      | 9300      | 2                            | 0.26        | 0.13      |
| FENTANYL BASE | 9801      | 2                            | 0.04        | 0.02      |

**BUSINESS ACTIVITY: M - MID-LEVEL PRACTITIONERS**

| DRUG NAME     | DRUG CODE | NUMBER OF REGISTRANT SOLD TO | TOTAL GRAMS | AVG GRAMS |
|---------------|-----------|------------------------------|-------------|-----------|
| CODEINE       | 9050      | 39                           | 47.00       | 1.21      |
| BUPRENORPHINE | 9064      | 5                            | 0.18        | 0.04      |
| HYDROMORPHONE | 9150      | 9                            | 0.84        | 0.09      |
| MORPHINE      | 9300      | 79                           | 111.12      | 1.41      |
| FENTANYL BASE | 9801      | 84                           | 4.28        | 0.05      |

**BUSINESS ACTIVITY: NTP - NARCOTIC TREATMENT PROGRAMS**

| DRUG NAME     | DRUG CODE | NUMBER OF REGISTRANT SOLD TO | TOTAL GRAMS | AVG GRAMS |
|---------------|-----------|------------------------------|-------------|-----------|
| BUPRENORPHINE | 9064      | 55                           | 13,995.40   | 254.46    |
| METHADONE     | 9250B     | 71                           | 418,791.17  | 5,898.47  |

**STATE: ND - NORTH DAKOTA****BUSINESS ACTIVITY: A - PHARMACIES**

| DRUG NAME                        | DRUG CODE | NUMBER OF REGISTRANT SOLD TO | TOTAL GRAMS | AVG GRAMS |
|----------------------------------|-----------|------------------------------|-------------|-----------|
| AMPHETAMINE                      | 1100      | 171                          | 34,654.61   | 202.66    |
| METHAMPHETAMINE                  | 1105      | 4                            | 14.06       | 3.51      |
| LISDEXAMFETAMINE                 | 1205      | 166                          | 22,062.03   | 132.90    |
| METHYLPHENIDATE (DL;D;L;ISOMERS) | 1724      | 170                          | 54,587.50   | 321.10    |
| CODEINE                          | 9050      | 165                          | 15,906.08   | 96.40     |
| BUPRENORPHINE                    | 9064      | 136                          | 4,306.25    | 31.66     |
| OXYCODONE                        | 9143      | 170                          | 42,595.65   | 250.56    |

|                        |       |     |           |        |
|------------------------|-------|-----|-----------|--------|
| HYDROMORPHONE          | 9150  | 153 | 1,712.72  | 11.19  |
| HYDROCODONE            | 9193  | 175 | 28,462.56 | 162.64 |
| MEPERIDINE (PETHIDINE) | 9230  | 39  | 524.75    | 13.46  |
| METHADONE              | 9250B | 126 | 3,098.56  | 24.59  |
| MORPHINE               | 9300  | 167 | 16,685.46 | 99.91  |
| OXYMORPHONE            | 9652  | 25  | 292.12    | 11.68  |
| TAPENTADOL             | 9780  | 70  | 6,260.50  | 89.44  |
| FENTANYL BASE          | 9801  | 163 | 585.56    | 3.59   |

**BUSINESS ACTIVITY: B - HOSPITALS**

| DRUG NAME                        | DRUG CODE | NUMBER OF REGISTRANT SOLD TO | TOTAL GRAMS | AVG GRAMS |
|----------------------------------|-----------|------------------------------|-------------|-----------|
| AMPHETAMINE                      | 1100      | 23                           | 2,850.98    | 123.96    |
| METHAMPHETAMINE                  | 1105      | 1                            | 5.22        | 5.22      |
| LISDEXAMFETAMINE                 | 1205      | 17                           | 1,460.28    | 85.90     |
| METHYLPHENIDATE (DL;D;L;ISOMERS) | 1724      | 27                           | 5,671.24    | 210.05    |
| CODEINE                          | 9050      | 40                           | 2,811.49    | 70.29     |
| BUPRENORPHINE                    | 9064      | 18                           | 310.57      | 17.25     |
| OXYCODONE                        | 9143      | 53                           | 8,218.31    | 155.06    |
| HYDROMORPHONE                    | 9150      | 52                           | 650.85      | 12.52     |
| HYDROCODONE                      | 9193      | 54                           | 6,891.02    | 127.61    |
| MEPERIDINE (PETHIDINE)           | 9230      | 27                           | 187.37      | 6.94      |
| METHADONE                        | 9250B     | 24                           | 396.49      | 16.52     |
| MORPHINE                         | 9300      | 56                           | 4,804.29    | 85.79     |
| OXYMORPHONE                      | 9652      | 1                            | 8.92        | 8.92      |
| TAPENTADOL                       | 9780      | 7                            | 965.50      | 137.93    |
| FENTANYL BASE                    | 9801      | 52                           | 148.82      | 2.86      |

**BUSINESS ACTIVITY: C - PRACTITIONERS**

| DRUG NAME              | DRUG CODE | NUMBER OF REGISTRANT SOLD TO | TOTAL GRAMS | AVG GRAMS |
|------------------------|-----------|------------------------------|-------------|-----------|
| CODEINE                | 9050      | 9                            | 57.88       | 6.43      |
| BUPRENORPHINE          | 9064      | 65                           | 35.73       | 0.55      |
| OXYCODONE              | 9143      | 6                            | 17.89       | 2.98      |
| HYDROMORPHONE          | 9150      | 25                           | 9.16        | 0.37      |
| HYDROCODONE            | 9193      | 27                           | 157.62      | 5.84      |
| MEPERIDINE (PETHIDINE) | 9230      | 12                           | 40.85       | 3.40      |
| METHADONE              | 9250B     | 1                            | 0.45        | 0.45      |
| MORPHINE               | 9300      | 34                           | 38.05       | 1.12      |
| FENTANYL BASE          | 9801      | 45                           | 5.35        | 0.12      |

**BUSINESS ACTIVITY: M - MID-LEVEL PRACTITIONERS**

| DRUG NAME                        | DRUG CODE | NUMBER OF REGISTRANT SOLD TO | TOTAL GRAMS | AVG GRAMS |
|----------------------------------|-----------|------------------------------|-------------|-----------|
| AMPHETAMINE                      | 1100      | 1                            | 1.47        | 1.47      |
| METHYLPHENIDATE (DL;D;L;ISOMERS) | 1724      | 1                            | 0.86        | 0.86      |

|               |      |   |      |      |
|---------------|------|---|------|------|
| BUPRENORPHINE | 9064 | 1 | 0.72 | 0.72 |
|---------------|------|---|------|------|

**BUSINESS ACTIVITY: NTP - NARCOTIC TREATMENT PROGRAMS**

| DRUG NAME | DRUG CODE | NUMBER OF REGISTRANT SOLD TO | TOTAL GRAMS | AVG GRAMS |
|-----------|-----------|------------------------------|-------------|-----------|
| METHADONE | 9250B     | 3                            | 12,378.50   | 4,126.17  |

**STATE: NE - NEBRASKA****BUSINESS ACTIVITY: A - PHARMACIES**

| DRUG NAME                        | DRUG CODE | NUMBER OF REGISTRANT SOLD TO | TOTAL GRAMS | AVG GRAMS |
|----------------------------------|-----------|------------------------------|-------------|-----------|
| AMPHETAMINE                      | 1100      | 425                          | 106,247.19  | 249.99    |
| METHAMPHETAMINE                  | 1105      | 8                            | 20.09       | 2.51      |
| LISDEXAMFETAMINE                 | 1205      | 418                          | 68,763.26   | 164.51    |
| METHYLPHENIDATE (DL;D;L;ISOMERS) | 1724      | 433                          | 117,609.12  | 271.61    |
| CODEINE                          | 9050      | 420                          | 37,762.18   | 89.91     |
| BUPRENORPHINE                    | 9064      | 369                          | 5,611.34    | 15.21     |
| OXYCODONE                        | 9143      | 438                          | 134,598.30  | 307.30    |
| HYDROMORPHONE                    | 9150      | 374                          | 3,515.69    | 9.40      |
| HYDROCODONE                      | 9193      | 442                          | 102,181.78  | 231.18    |
| MEPERIDINE (PETHIDINE)           | 9230      | 80                           | 1,003.10    | 12.54     |
| METHADONE                        | 9250B     | 334                          | 8,764.94    | 26.24     |
| MORPHINE                         | 9300      | 436                          | 59,148.84   | 135.66    |
| OXYMORPHONE                      | 9652      | 130                          | 2,063.65    | 15.87     |
| TAPENTADOL                       | 9780      | 301                          | 35,915.50   | 119.32    |
| FENTANYL BASE                    | 9801      | 411                          | 1,564.25    | 3.81      |

**BUSINESS ACTIVITY: B - HOSPITALS**

| DRUG NAME                        | DRUG CODE | NUMBER OF REGISTRANT SOLD TO | TOTAL GRAMS | AVG GRAMS |
|----------------------------------|-----------|------------------------------|-------------|-----------|
| AMPHETAMINE                      | 1100      | 41                           | 3,768.94    | 91.93     |
| LISDEXAMFETAMINE                 | 1205      | 21                           | 666.55      | 31.74     |
| METHYLPHENIDATE (DL;D;L;ISOMERS) | 1724      | 59                           | 4,019.93    | 68.13     |
| CODEINE                          | 9050      | 73                           | 2,105.38    | 28.84     |
| BUPRENORPHINE                    | 9064      | 38                           | 330.86      | 8.71      |
| OXYCODONE                        | 9143      | 124                          | 8,966.55    | 72.31     |
| HYDROMORPHONE                    | 9150      | 109                          | 757.11      | 6.95      |
| HYDROCODONE                      | 9193      | 129                          | 6,418.01    | 49.75     |
| MEPERIDINE (PETHIDINE)           | 9230      | 98                           | 812.65      | 8.29      |
| METHADONE                        | 9250B     | 46                           | 959.05      | 20.85     |
| MORPHINE                         | 9300      | 124                          | 7,986.33    | 64.41     |
| OXYMORPHONE                      | 9652      | 9                            | 48.08       | 5.34      |
| TAPENTADOL                       | 9780      | 40                           | 1,079.00    | 26.98     |
| FENTANYL BASE                    | 9801      | 132                          | 191.42      | 1.45      |

**BUSINESS ACTIVITY: C - PRACTITIONERS**

| DRUG NAME | DRUG CODE | NUMBER OF REGISTRANT SOLD TO | TOTAL GRAMS | AVG GRAMS |
|-----------|-----------|------------------------------|-------------|-----------|
|-----------|-----------|------------------------------|-------------|-----------|



|                        |       |     |          |       |
|------------------------|-------|-----|----------|-------|
| AMPHETAMINE            | 1100  | 1   | 2.04     | 2.04  |
| LISDEXAMFETAMINE       | 1205  | 1   | 20.75    | 20.75 |
| CODEINE                | 9050  | 29  | 1,326.69 | 45.75 |
| BUPRENORPHINE          | 9064  | 169 | 18.30    | 0.11  |
| OXYCODONE              | 9143  | 7   | 96.06    | 13.72 |
| HYDROMORPHONE          | 9150  | 58  | 39.22    | 0.68  |
| HYDROCODONE            | 9193  | 66  | 176.77   | 2.68  |
| MEPERIDINE (PETHIDINE) | 9230  | 19  | 120.81   | 6.36  |
| METHADONE              | 9250B | 3   | 8.50     | 2.83  |
| MORPHINE               | 9300  | 43  | 42.67    | 0.99  |
| OXYMORPHONE            | 9652  | 1   | 3.21     | 3.21  |
| TAPENTADOL             | 9780  | 1   | 60.00    | 60.00 |
| FENTANYL BASE          | 9801  | 95  | 11.74    | 0.12  |

**BUSINESS ACTIVITY: D - TEACHING INSTITUTIONS**

| DRUG NAME     | DRUG CODE | NUMBER OF REGISTRANT SOLD TO | TOTAL GRAMS | AVG GRAMS |
|---------------|-----------|------------------------------|-------------|-----------|
| HYDROMORPHONE | 9150      | 1                            | 0.44        | 0.44      |

**BUSINESS ACTIVITY: M - MID-LEVEL PRACTITIONERS**

| DRUG NAME     | DRUG CODE | NUMBER OF REGISTRANT SOLD TO | TOTAL GRAMS | AVG GRAMS |
|---------------|-----------|------------------------------|-------------|-----------|
| CODEINE       | 9050      | 5                            | 6.50        | 1.30      |
| HYDROMORPHONE | 9150      | 8                            | 0.36        | 0.05      |
| MORPHINE      | 9300      | 22                           | 6.17        | 0.28      |
| FENTANYL BASE | 9801      | 29                           | 0.52        | 0.02      |

**BUSINESS ACTIVITY: NTP - NARCOTIC TREATMENT PROGRAMS**

| DRUG NAME     | DRUG CODE | NUMBER OF REGISTRANT SOLD TO | TOTAL GRAMS | AVG GRAMS |
|---------------|-----------|------------------------------|-------------|-----------|
| BUPRENORPHINE | 9064      | 1                            | 3.38        | 3.38      |
| METHADONE     | 9250B     | 3                            | 18,621.41   | 6,207.14  |

**STATE: NH - NEW HAMPSHIRE****BUSINESS ACTIVITY: A - PHARMACIES**

| DRUG NAME                        | DRUG CODE | NUMBER OF REGISTRANT SOLD TO | TOTAL GRAMS | AVG GRAMS |
|----------------------------------|-----------|------------------------------|-------------|-----------|
| AMPHETAMINE                      | 1100      | 274                          | 158,538.42  | 578.61    |
| METHAMPHETAMINE                  | 1105      | 7                            | 19.69       | 2.81      |
| LISDEXAMFETAMINE                 | 1205      | 272                          | 56,084.95   | 206.19    |
| METHYLPHENIDATE (DL;D;L;ISOMERS) | 1724      | 274                          | 130,759.86  | 477.23    |
| CODEINE                          | 9050      | 265                          | 25,908.75   | 97.77     |
| BUPRENORPHINE                    | 9064      | 271                          | 33,650.54   | 124.17    |
| OXYCODONE                        | 9143      | 273                          | 197,100.97  | 721.98    |
| HYDROMORPHONE                    | 9150      | 270                          | 5,628.07    | 20.84     |
| HYDROCODONE                      | 9193      | 273                          | 29,904.39   | 109.54    |
| MEPERIDINE (PETHIDINE)           | 9230      | 52                           | 1,823.61    | 35.07     |
| METHADONE                        | 9250B     | 257                          | 17,270.15   | 67.20     |

|               |      |     |           |        |
|---------------|------|-----|-----------|--------|
| MORPHINE      | 9300 | 276 | 60,853.75 | 220.48 |
| OXYMORPHONE   | 9652 | 110 | 1,677.33  | 15.25  |
| TAPENTADOL    | 9780 | 203 | 23,990.00 | 118.18 |
| FENTANYL BASE | 9801 | 258 | 965.01    | 3.74   |

**BUSINESS ACTIVITY: B - HOSPITALS**

| DRUG NAME                        | DRUG CODE | NUMBER OF REGISTRANT SOLD TO | TOTAL GRAMS | AVG GRAMS |
|----------------------------------|-----------|------------------------------|-------------|-----------|
| AMPHETAMINE                      | 1100      | 22                           | 2,915.49    | 132.52    |
| LISDEXAMFETAMINE                 | 1205      | 11                           | 453.23      | 41.20     |
| METHYLPHENIDATE (DL;D;L;ISOMERS) | 1724      | 33                           | 2,204.01    | 66.79     |
| CODEINE                          | 9050      | 34                           | 459.14      | 13.50     |
| BUPRENORPHINE                    | 9064      | 29                           | 636.27      | 21.94     |
| OXYCODONE                        | 9143      | 45                           | 9,600.30    | 213.34    |
| HYDROMORPHONE                    | 9150      | 40                           | 905.07      | 22.63     |
| HYDROCODONE                      | 9193      | 41                           | 1,224.50    | 29.87     |
| MEPERIDINE (PETHIDINE)           | 9230      | 25                           | 293.48      | 11.74     |
| METHADONE                        | 9250B     | 34                           | 1,284.54    | 37.78     |
| MORPHINE                         | 9300      | 43                           | 4,478.49    | 104.15    |
| TAPENTADOL                       | 9780      | 2                            | 301.50      | 150.75    |
| FENTANYL BASE                    | 9801      | 49                           | 127.74      | 2.61      |

**BUSINESS ACTIVITY: C - PRACTITIONERS**

| DRUG NAME              | DRUG CODE | NUMBER OF REGISTRANT SOLD TO | TOTAL GRAMS | AVG GRAMS |
|------------------------|-----------|------------------------------|-------------|-----------|
| CODEINE                | 9050      | 1                            | 4.78        | 4.78      |
| BUPRENORPHINE          | 9064      | 197                          | 11.22       | 0.06      |
| OXYCODONE              | 9143      | 9                            | 12.10       | 1.34      |
| HYDROMORPHONE          | 9150      | 88                           | 61.61       | 0.70      |
| HYDROCODONE            | 9193      | 10                           | 7.39        | 0.74      |
| MEPERIDINE (PETHIDINE) | 9230      | 8                            | 71.90       | 8.99      |
| METHADONE              | 9250B     | 6                            | 5.55        | 0.92      |
| MORPHINE               | 9300      | 51                           | 47.25       | 0.93      |
| FENTANYL BASE          | 9801      | 100                          | 10.89       | 0.11      |

**BUSINESS ACTIVITY: M - MID-LEVEL PRACTITIONERS**

| DRUG NAME     | DRUG CODE | NUMBER OF REGISTRANT SOLD TO | TOTAL GRAMS | AVG GRAMS |
|---------------|-----------|------------------------------|-------------|-----------|
| CODEINE       | 9050      | 1                            | 4.42        | 4.42      |
| FENTANYL BASE | 9801      | 1                            | 0.01        | 0.01      |

**BUSINESS ACTIVITY: NTP - NARCOTIC TREATMENT PROGRAMS**

| DRUG NAME     | DRUG CODE | NUMBER OF REGISTRANT SOLD TO | TOTAL GRAMS | AVG GRAMS |
|---------------|-----------|------------------------------|-------------|-----------|
| BUPRENORPHINE | 9064      | 5                            | 547.48      | 109.50    |
| METHADONE     | 9250B     | 9                            | 101,309.58  | 11,256.62 |

**STATE: NJ - NEW JERSEY****BUSINESS ACTIVITY: A - PHARMACIES**

| DRUG NAME                        | DRUG CODE | NUMBER OF REGISTRANT SOLD TO | TOTAL GRAMS  | AVG GRAMS |
|----------------------------------|-----------|------------------------------|--------------|-----------|
| AMPHETAMINE                      | 1100      | 2,085                        | 434,940.52   | 208.60    |
| METHAMPHETAMINE                  | 1105      | 52                           | 139.43       | 2.68      |
| LISDEXAMFETAMINE                 | 1205      | 1,889                        | 193,393.53   | 102.38    |
| METHYLPHENIDATE (DL;D;L;ISOMERS) | 1724      | 2,044                        | 351,924.03   | 172.17    |
| CODEINE                          | 9050      | 2,100                        | 260,507.88   | 124.05    |
| BUPRENORPHINE                    | 9064      | 1,936                        | 107,789.89   | 55.68     |
| OXYCODONE                        | 9143      | 2,165                        | 1,590,234.19 | 734.52    |
| HYDROMORPHONE                    | 9150      | 1,770                        | 24,740.05    | 13.98     |
| HYDROCODONE                      | 9193      | 2,088                        | 111,658.42   | 53.48     |
| MEPERIDINE (PETHIDINE)           | 9230      | 180                          | 4,752.07     | 26.40     |
| METHADONE                        | 9250B     | 1,199                        | 35,353.04    | 29.49     |
| MORPHINE                         | 9300      | 1,872                        | 268,314.43   | 143.33    |
| OXYMORPHONE                      | 9652      | 670                          | 13,135.99    | 19.61     |
| TAPENTADOL                       | 9780      | 1,212                        | 133,297.50   | 109.98    |
| FENTANYL BASE                    | 9801      | 1,790                        | 6,346.22     | 3.55      |

**BUSINESS ACTIVITY: B - HOSPITALS**

| DRUG NAME                        | DRUG CODE | NUMBER OF REGISTRANT SOLD TO | TOTAL GRAMS | AVG GRAMS |
|----------------------------------|-----------|------------------------------|-------------|-----------|
| AMPHETAMINE                      | 1100      | 53                           | 3,287.83    | 62.03     |
| LISDEXAMFETAMINE                 | 1205      | 23                           | 1,382.96    | 60.13     |
| METHYLPHENIDATE (DL;D;L;ISOMERS) | 1724      | 102                          | 3,579.80    | 35.10     |
| CODEINE                          | 9050      | 106                          | 4,094.83    | 38.63     |
| BUPRENORPHINE                    | 9064      | 88                           | 943.38      | 10.72     |
| OXYCODONE                        | 9143      | 124                          | 33,433.54   | 269.63    |
| HYDROMORPHONE                    | 9150      | 111                          | 4,517.07    | 40.69     |
| HYDROCODONE                      | 9193      | 92                           | 1,223.64    | 13.30     |
| MEPERIDINE (PETHIDINE)           | 9230      | 76                           | 1,192.97    | 15.70     |
| METHADONE                        | 9250B     | 103                          | 3,938.49    | 38.24     |
| MORPHINE                         | 9300      | 120                          | 14,745.60   | 122.88    |
| OXYMORPHONE                      | 9652      | 4                            | 19.09       | 4.77      |
| TAPENTADOL                       | 9780      | 30                           | 1,443.50    | 48.12     |
| FENTANYL BASE                    | 9801      | 110                          | 992.08      | 9.02      |

**BUSINESS ACTIVITY: C - PRACTITIONERS**

| DRUG NAME     | DRUG CODE | NUMBER OF REGISTRANT SOLD TO | TOTAL GRAMS | AVG GRAMS |
|---------------|-----------|------------------------------|-------------|-----------|
| AMPHETAMINE   | 1100      | 2                            | 10.90       | 5.45      |
| CODEINE       | 9050      | 240                          | 4,959.15    | 20.66     |
| BUPRENORPHINE | 9064      | 606                          | 727.95      | 1.20      |
| OXYCODONE     | 9143      | 114                          | 168.18      | 1.48      |
| HYDROMORPHONE | 9150      | 284                          | 155.08      | 0.55      |
| HYDROCODONE   | 9193      | 268                          | 904.17      | 3.37      |

|                        |       |     |        |      |
|------------------------|-------|-----|--------|------|
| MEPERIDINE (PETHIDINE) | 9230  | 91  | 325.18 | 3.57 |
| METHADONE              | 9250B | 22  | 62.88  | 2.86 |
| MORPHINE               | 9300  | 178 | 172.03 | 0.97 |
| FENTANYL BASE          | 9801  | 516 | 62.46  | 0.12 |

**BUSINESS ACTIVITY: D - TEACHING INSTITUTIONS**

| DRUG NAME     | DRUG CODE | NUMBER OF REGISTRANT SOLD TO | TOTAL GRAMS | AVG GRAMS |
|---------------|-----------|------------------------------|-------------|-----------|
| BUPRENORPHINE | 9064      | 3                            | 0.01        | 0.00      |

**BUSINESS ACTIVITY: M - MID-LEVEL PRACTITIONERS**

| DRUG NAME     | DRUG CODE | NUMBER OF REGISTRANT SOLD TO | TOTAL GRAMS | AVG GRAMS |
|---------------|-----------|------------------------------|-------------|-----------|
| CODEINE       | 9050      | 10                           | 564.96      | 56.50     |
| BUPRENORPHINE | 9064      | 2                            | 0.85        | 0.42      |

**BUSINESS ACTIVITY: NTP - NARCOTIC TREATMENT PROGRAMS**

| DRUG NAME     | DRUG CODE | NUMBER OF REGISTRANT SOLD TO | TOTAL GRAMS | AVG GRAMS |
|---------------|-----------|------------------------------|-------------|-----------|
| BUPRENORPHINE | 9064      | 24                           | 1,605.58    | 66.90     |
| METHADONE     | 9250B     | 33                           | 429,160.85  | 13,004.87 |

**STATE: NM - NEW MEXICO****BUSINESS ACTIVITY: A - PHARMACIES**

| DRUG NAME                        | DRUG CODE | NUMBER OF REGISTRANT SOLD TO | TOTAL GRAMS | AVG GRAMS |
|----------------------------------|-----------|------------------------------|-------------|-----------|
| AMPHETAMINE                      | 1100      | 305                          | 58,563.20   | 192.01    |
| METHAMPHETAMINE                  | 1105      | 13                           | 22.90       | 1.76      |
| LISDEXAMFETAMINE                 | 1205      | 272                          | 15,249.12   | 56.06     |
| METHYLPHENIDATE (DL;D;L;ISOMERS) | 1724      | 311                          | 66,225.81   | 212.94    |
| CODEINE                          | 9050      | 315                          | 57,099.08   | 181.27    |
| BUPRENORPHINE                    | 9064      | 311                          | 31,976.84   | 102.82    |
| OXYCODONE                        | 9143      | 314                          | 288,341.87  | 918.29    |
| HYDROMORPHONE                    | 9150      | 266                          | 3,731.75    | 14.03     |
| HYDROCODONE                      | 9193      | 315                          | 111,824.69  | 355.00    |
| MEPERIDINE (PETHIDINE)           | 9230      | 162                          | 4,085.70    | 25.22     |
| METHADONE                        | 9250B     | 254                          | 7,075.42    | 27.86     |
| MORPHINE                         | 9300      | 312                          | 72,835.08   | 233.45    |
| OXYMORPHONE                      | 9652      | 130                          | 1,766.13    | 13.59     |
| TAPENTADOL                       | 9780      | 141                          | 10,168.50   | 72.12     |
| FENTANYL BASE                    | 9801      | 297                          | 1,079.99    | 3.64      |

**BUSINESS ACTIVITY: B - HOSPITALS**

| DRUG NAME                        | DRUG CODE | NUMBER OF REGISTRANT SOLD TO | TOTAL GRAMS | AVG GRAMS |
|----------------------------------|-----------|------------------------------|-------------|-----------|
| AMPHETAMINE                      | 1100      | 41                           | 2,629.01    | 64.12     |
| LISDEXAMFETAMINE                 | 1205      | 12                           | 429.53      | 35.79     |
| METHYLPHENIDATE (DL;D;L;ISOMERS) | 1724      | 58                           | 6,215.98    | 107.17    |
| CODEINE                          | 9050      | 63                           | 8,541.68    | 135.58    |
| BUPRENORPHINE                    | 9064      | 51                           | 1,695.79    | 33.25     |

|                        |       |    |           |        |
|------------------------|-------|----|-----------|--------|
| OXYCODONE              | 9143  | 86 | 22,760.60 | 264.66 |
| HYDROMORPHONE          | 9150  | 63 | 711.80    | 11.30  |
| HYDROCODONE            | 9193  | 91 | 9,886.96  | 108.65 |
| MEPERIDINE (PETHIDINE) | 9230  | 45 | 969.22    | 21.54  |
| METHADONE              | 9250B | 44 | 2,032.70  | 46.20  |
| MORPHINE               | 9300  | 89 | 13,069.11 | 146.84 |
| OXYMORPHONE            | 9652  | 3  | 4.91      | 1.64   |
| TAPENTADOL             | 9780  | 1  | 36.00     | 36.00  |
| FENTANYL BASE          | 9801  | 91 | 253.51    | 2.79   |

**BUSINESS ACTIVITY: C - PRACTITIONERS**

| DRUG NAME              | DRUG CODE | NUMBER OF REGISTRANT SOLD TO | TOTAL GRAMS | AVG GRAMS |
|------------------------|-----------|------------------------------|-------------|-----------|
| CODEINE                | 9050      | 12                           | 347.93      | 28.99     |
| BUPRENORPHINE          | 9064      | 134                          | 10.71       | 0.08      |
| OXYCODONE              | 9143      | 3                            | 20.62       | 6.87      |
| HYDROMORPHONE          | 9150      | 58                           | 55.21       | 0.95      |
| HYDROCODONE            | 9193      | 45                           | 82.93       | 1.84      |
| MEPERIDINE (PETHIDINE) | 9230      | 7                            | 40.31       | 5.76      |
| MORPHINE               | 9300      | 37                           | 43.57       | 1.18      |
| FENTANYL BASE          | 9801      | 104                          | 15.73       | 0.15      |

**BUSINESS ACTIVITY: D - TEACHING INSTITUTIONS**

| DRUG NAME     | DRUG CODE | NUMBER OF REGISTRANT SOLD TO | TOTAL GRAMS | AVG GRAMS |
|---------------|-----------|------------------------------|-------------|-----------|
| BUPRENORPHINE | 9064      | 1                            | 0.02        | 0.02      |
| MORPHINE      | 9300      | 1                            | 0.04        | 0.04      |

**BUSINESS ACTIVITY: M - MID-LEVEL PRACTITIONERS**

| DRUG NAME     | DRUG CODE | NUMBER OF REGISTRANT SOLD TO | TOTAL GRAMS | AVG GRAMS |
|---------------|-----------|------------------------------|-------------|-----------|
| AMPHETAMINE   | 1100      | 1                            | 4.50        | 4.50      |
| CODEINE       | 9050      | 7                            | 18.21       | 2.60      |
| BUPRENORPHINE | 9064      | 6                            | 2.35        | 0.39      |
| HYDROMORPHONE | 9150      | 5                            | 2.31        | 0.46      |
| HYDROCODONE   | 9193      | 2                            | 4.90        | 2.45      |
| MORPHINE      | 9300      | 33                           | 21.05       | 0.64      |
| FENTANYL BASE | 9801      | 47                           | 1.13        | 0.02      |

**BUSINESS ACTIVITY: NTP - NARCOTIC TREATMENT PROGRAMS**

| DRUG NAME     | DRUG CODE | NUMBER OF REGISTRANT SOLD TO | TOTAL GRAMS | AVG GRAMS |
|---------------|-----------|------------------------------|-------------|-----------|
| BUPRENORPHINE | 9064      | 4                            | 509.84      | 127.46    |
| METHADONE     | 9250B     | 16                           | 162,378.32  | 10,148.65 |

**STATE: NV - NEVADA****BUSINESS ACTIVITY: A - PHARMACIES**

| DRUG NAME   | DRUG CODE | NUMBER OF REGISTRANT SOLD TO | TOTAL GRAMS | AVG GRAMS |
|-------------|-----------|------------------------------|-------------|-----------|
| AMPHETAMINE | 1100      | 458                          | 104,503.92  | 228.17    |

|                                  |       |     |            |          |
|----------------------------------|-------|-----|------------|----------|
| METHAMPHETAMINE                  | 1105  | 20  | 81.98      | 4.10     |
| LISDEXAMFETAMINE                 | 1205  | 420 | 30,982.11  | 73.77    |
| METHYLPHENIDATE (DL;D;L;ISOMERS) | 1724  | 440 | 53,267.37  | 121.06   |
| CODEINE                          | 9050  | 462 | 76,087.90  | 164.69   |
| BUPRENORPHINE                    | 9064  | 432 | 14,500.54  | 33.57    |
| OXYCODONE                        | 9143  | 465 | 561,088.85 | 1,206.64 |
| HYDROMORPHONE                    | 9150  | 423 | 7,428.95   | 17.56    |
| HYDROCODONE                      | 9193  | 465 | 279,813.77 | 601.75   |
| MEPERIDINE (PETHIDINE)           | 9230  | 138 | 2,140.62   | 15.51    |
| METHADONE                        | 9250B | 431 | 32,117.37  | 74.52    |
| MORPHINE                         | 9300  | 462 | 166,347.02 | 360.06   |
| OXYMORPHONE                      | 9652  | 278 | 6,466.16   | 23.26    |
| TAPENTADOL                       | 9780  | 313 | 34,130.00  | 109.04   |
| FENTANYL BASE                    | 9801  | 427 | 1,339.69   | 3.14     |

**BUSINESS ACTIVITY: B - HOSPITALS**

| DRUG NAME                        | DRUG CODE | NUMBER OF REGISTRANT SOLD TO | TOTAL GRAMS | AVG GRAMS |
|----------------------------------|-----------|------------------------------|-------------|-----------|
| AMPHETAMINE                      | 1100      | 36                           | 3,547.31    | 98.54     |
| LISDEXAMFETAMINE                 | 1205      | 11                           | 493.70      | 44.88     |
| METHYLPHENIDATE (DL;D;L;ISOMERS) | 1724      | 52                           | 4,536.36    | 87.24     |
| CODEINE                          | 9050      | 47                           | 2,541.57    | 54.08     |
| BUPRENORPHINE                    | 9064      | 36                           | 509.73      | 14.16     |
| OXYCODONE                        | 9143      | 92                           | 33,509.54   | 364.23    |
| HYDROMORPHONE                    | 9150      | 79                           | 1,634.40    | 20.69     |
| HYDROCODONE                      | 9193      | 97                           | 20,707.75   | 213.48    |
| MEPERIDINE (PETHIDINE)           | 9230      | 75                           | 2,013.71    | 26.85     |
| METHADONE                        | 9250B     | 54                           | 1,996.48    | 36.97     |
| MORPHINE                         | 9300      | 102                          | 19,478.17   | 190.96    |
| OXYMORPHONE                      | 9652      | 6                            | 19.54       | 3.26      |
| TAPENTADOL                       | 9780      | 13                           | 617.00      | 47.46     |
| FENTANYL BASE                    | 9801      | 120                          | 293.21      | 2.44      |

**BUSINESS ACTIVITY: C - PRACTITIONERS**

| DRUG NAME                        | DRUG CODE | NUMBER OF REGISTRANT SOLD TO | TOTAL GRAMS | AVG GRAMS |
|----------------------------------|-----------|------------------------------|-------------|-----------|
| AMPHETAMINE                      | 1100      | 1                            | 2.58        | 2.58      |
| LISDEXAMFETAMINE                 | 1205      | 2                            | 5.60        | 2.80      |
| METHYLPHENIDATE (DL;D;L;ISOMERS) | 1724      | 1                            | 412.42      | 412.42    |
| CODEINE                          | 9050      | 25                           | 136.09      | 5.44      |
| BUPRENORPHINE                    | 9064      | 241                          | 65.42       | 0.27      |
| OXYCODONE                        | 9143      | 20                           | 216.06      | 10.80     |
| HYDROMORPHONE                    | 9150      | 124                          | 187.35      | 1.51      |
| HYDROCODONE                      | 9193      | 112                          | 502.28      | 4.48      |

|                        |       |     |        |       |
|------------------------|-------|-----|--------|-------|
| MEPERIDINE (PETHIDINE) | 9230  | 55  | 958.76 | 17.43 |
| METHADONE              | 9250B | 18  | 52.14  | 2.90  |
| MORPHINE               | 9300  | 78  | 227.54 | 2.92  |
| TAPENTADOL             | 9780  | 1   | 10.00  | 10.00 |
| FENTANYL BASE          | 9801  | 178 | 26.87  | 0.15  |

**BUSINESS ACTIVITY: M - MID-LEVEL PRACTITIONERS**

| DRUG NAME     | DRUG CODE | NUMBER OF REGISTRANT SOLD TO | TOTAL GRAMS | AVG GRAMS |
|---------------|-----------|------------------------------|-------------|-----------|
| CODEINE       | 9050      | 6                            | 29.54       | 4.92      |
| BUPRENORPHINE | 9064      | 2                            | 1.74        | 0.87      |
| OXYCODONE     | 9143      | 2                            | 129.54      | 64.77     |
| HYDROMORPHONE | 9150      | 2                            | 4.26        | 2.13      |
| HYDROCODONE   | 9193      | 2                            | 39.35       | 19.68     |
| METHADONE     | 9250B     | 2                            | 42.48       | 21.24     |
| MORPHINE      | 9300      | 3                            | 47.75       | 15.92     |
| TAPENTADOL    | 9780      | 1                            | 10.00       | 10.00     |
| FENTANYL BASE | 9801      | 3                            | 0.85        | 0.28      |

**BUSINESS ACTIVITY: NTP - NARCOTIC TREATMENT PROGRAMS**

| DRUG NAME     | DRUG CODE | NUMBER OF REGISTRANT SOLD TO | TOTAL GRAMS | AVG GRAMS |
|---------------|-----------|------------------------------|-------------|-----------|
| BUPRENORPHINE | 9064      | 7                            | 213.50      | 30.50     |
| METHADONE     | 9250B     | 14                           | 102,358.71  | 7,311.34  |

**STATE: NY - NEW YORK****BUSINESS ACTIVITY: A - PHARMACIES**

| DRUG NAME                        | DRUG CODE | NUMBER OF REGISTRANT SOLD TO | TOTAL GRAMS  | AVG GRAMS |
|----------------------------------|-----------|------------------------------|--------------|-----------|
| AMPHETAMINE                      | 1100      | 4,823                        | 990,069.62   | 205.28    |
| METHAMPHETAMINE                  | 1105      | 98                           | 365.64       | 3.73      |
| LISDEXAMFETAMINE                 | 1205      | 3,936                        | 347,036.32   | 88.17     |
| METHYLPHENIDATE (DL;D;L;ISOMERS) | 1724      | 4,714                        | 886,922.74   | 188.15    |
| CODEINE                          | 9050      | 5,009                        | 482,419.58   | 96.31     |
| BUPRENORPHINE                    | 9064      | 4,225                        | 236,237.31   | 55.91     |
| OXYCODONE                        | 9143      | 5,182                        | 2,392,089.63 | 461.62    |
| HYDROMORPHONE                    | 9150      | 3,918                        | 50,877.48    | 12.99     |
| HYDROCODONE                      | 9193      | 4,858                        | 555,535.29   | 114.35    |
| MEPERIDINE (PETHIDINE)           | 9230      | 325                          | 9,899.04     | 30.46     |
| METHADONE                        | 9250B     | 3,192                        | 117,122.31   | 36.69     |
| MORPHINE                         | 9300      | 4,178                        | 476,949.74   | 114.16    |
| OXYMORPHONE                      | 9652      | 1,601                        | 41,726.15    | 26.06     |
| TAPENTADOL                       | 9780      | 2,514                        | 301,767.50   | 120.03    |
| FENTANYL BASE                    | 9801      | 4,043                        | 11,290.18    | 2.79      |

**BUSINESS ACTIVITY: B - HOSPITALS**

| DRUG NAME | DRUG CODE | NUMBER OF REGISTRANT SOLD TO | TOTAL GRAMS | AVG GRAMS |
|-----------|-----------|------------------------------|-------------|-----------|
|-----------|-----------|------------------------------|-------------|-----------|

|                                  |       |     |           |        |
|----------------------------------|-------|-----|-----------|--------|
| AMPHETAMINE                      | 1100  | 181 | 9,067.74  | 50.10  |
| LISDEXAMFETAMINE                 | 1205  | 84  | 1,502.44  | 17.89  |
| METHYLPHENIDATE (DL;D;L;ISOMERS) | 1724  | 245 | 10,738.53 | 43.83  |
| CODEINE                          | 9050  | 264 | 10,833.37 | 41.04  |
| BUPRENORPHINE                    | 9064  | 229 | 5,065.52  | 22.12  |
| OXYCODONE                        | 9143  | 328 | 82,238.16 | 250.73 |
| HYDROMORPHONE                    | 9150  | 275 | 14,157.63 | 51.48  |
| HYDROCODONE                      | 9193  | 243 | 21,838.70 | 89.87  |
| MEPERIDINE (PETHIDINE)           | 9230  | 177 | 4,317.61  | 24.39  |
| METHADONE                        | 9250B | 246 | 35,454.69 | 144.12 |
| MORPHINE                         | 9300  | 319 | 53,542.16 | 167.84 |
| OXYMORPHONE                      | 9652  | 30  | 164.68    | 5.49   |
| TAPENTADOL                       | 9780  | 81  | 5,843.00  | 72.14  |
| FENTANYL BASE                    | 9801  | 283 | 1,971.46  | 6.97   |

**BUSINESS ACTIVITY: C - PRACTITIONERS**

| DRUG NAME                        | DRUG CODE | NUMBER OF REGISTRANT SOLD TO | TOTAL GRAMS | AVG GRAMS |
|----------------------------------|-----------|------------------------------|-------------|-----------|
| AMPHETAMINE                      | 1100      | 4                            | 8.51        | 2.13      |
| LISDEXAMFETAMINE                 | 1205      | 1                            | 1.47        | 1.47      |
| METHYLPHENIDATE (DL;D;L;ISOMERS) | 1724      | 1                            | 7.00        | 7.00      |
| CODEINE                          | 9050      | 136                          | 4,307.93    | 31.68     |
| BUPRENORPHINE                    | 9064      | 1,136                        | 184.75      | 0.16      |
| OXYCODONE                        | 9143      | 163                          | 691.65      | 4.24      |
| HYDROMORPHONE                    | 9150      | 579                          | 392.11      | 0.68      |
| HYDROCODONE                      | 9193      | 407                          | 1,462.89    | 3.59      |
| MEPERIDINE (PETHIDINE)           | 9230      | 172                          | 1,497.56    | 8.71      |
| METHADONE                        | 9250B     | 39                           | 93.73       | 2.40      |
| MORPHINE                         | 9300      | 422                          | 663.72      | 1.57      |
| FENTANYL BASE                    | 9801      | 1,112                        | 140.79      | 0.13      |

**BUSINESS ACTIVITY: D - TEACHING INSTITUTIONS**

| DRUG NAME     | DRUG CODE | NUMBER OF REGISTRANT SOLD TO | TOTAL GRAMS | AVG GRAMS |
|---------------|-----------|------------------------------|-------------|-----------|
| AMPHETAMINE   | 1100      | 1                            | 0.73        | 0.73      |
| BUPRENORPHINE | 9064      | 7                            | 0.14        | 0.02      |
| FENTANYL BASE | 9801      | 1                            | 0.01        | 0.01      |

**BUSINESS ACTIVITY: M - MID-LEVEL PRACTITIONERS**

| DRUG NAME     | DRUG CODE | NUMBER OF REGISTRANT SOLD TO | TOTAL GRAMS | AVG GRAMS |
|---------------|-----------|------------------------------|-------------|-----------|
| CODEINE       | 9050      | 4                            | 35.60       | 8.90      |
| BUPRENORPHINE | 9064      | 4                            | 3.71        | 0.93      |
| OXYCODONE     | 9143      | 1                            | 0.45        | 0.45      |
| HYDROMORPHONE | 9150      | 1                            | 0.04        | 0.04      |
| HYDROCODONE   | 9193      | 1                            | 3.63        | 3.63      |



|                        |       |   |      |      |
|------------------------|-------|---|------|------|
| MEPERIDINE (PETHIDINE) | 9230  | 1 | 9.26 | 9.26 |
| METHADONE              | 9250B | 1 | 4.47 | 4.47 |
| MORPHINE               | 9300  | 1 | 0.04 | 0.04 |
| FENTANYL BASE          | 9801  | 1 | 0.28 | 0.28 |

**BUSINESS ACTIVITY: NTP - NARCOTIC TREATMENT PROGRAMS**

| DRUG NAME     | DRUG CODE | NUMBER OF REGISTRANT SOLD TO | TOTAL GRAMS | AVG GRAMS |
|---------------|-----------|------------------------------|-------------|-----------|
| BUPRENORPHINE | 9064      | 42                           | 2,786.21    | 66.34     |
| METHADONE     | 9250B     | 119                          | 973,944.72  | 8,184.41  |

**STATE: OH - OHIO****BUSINESS ACTIVITY: A - PHARMACIES**

| DRUG NAME                        | DRUG CODE | NUMBER OF REGISTRANT SOLD TO | TOTAL GRAMS  | AVG GRAMS |
|----------------------------------|-----------|------------------------------|--------------|-----------|
| AMPHETAMINE                      | 1100      | 2,223                        | 816,549.89   | 367.32    |
| METHAMPHETAMINE                  | 1105      | 44                           | 155.10       | 3.53      |
| LISDEXAMFETAMINE                 | 1205      | 2,163                        | 396,473.12   | 183.30    |
| METHYLPHENIDATE (DL;D;L;ISOMERS) | 1724      | 2,220                        | 797,052.31   | 359.03    |
| CODEINE                          | 9050      | 2,170                        | 299,656.61   | 138.09    |
| BUPRENORPHINE                    | 9064      | 2,100                        | 207,498.26   | 98.81     |
| OXYCODONE                        | 9143      | 2,230                        | 1,486,158.65 | 666.44    |
| HYDROMORPHONE                    | 9150      | 1,825                        | 22,448.82    | 12.30     |
| HYDROCODONE                      | 9193      | 2,235                        | 568,817.03   | 254.50    |
| MEPERIDINE (PETHIDINE)           | 9230      | 348                          | 6,958.71     | 20.00     |
| METHADONE                        | 9250B     | 1,872                        | 68,886.78    | 36.80     |
| MORPHINE                         | 9300      | 2,143                        | 356,441.77   | 166.33    |
| OXYMORPHONE                      | 9652      | 911                          | 17,796.19    | 19.53     |
| TAPENTADOL                       | 9780      | 1,492                        | 180,234.50   | 120.80    |
| FENTANYL BASE                    | 9801      | 2,037                        | 6,092.28     | 2.99      |

**BUSINESS ACTIVITY: B - HOSPITALS**

| DRUG NAME                        | DRUG CODE | NUMBER OF REGISTRANT SOLD TO | TOTAL GRAMS | AVG GRAMS |
|----------------------------------|-----------|------------------------------|-------------|-----------|
| AMPHETAMINE                      | 1100      | 163                          | 15,124.92   | 92.79     |
| METHAMPHETAMINE                  | 1105      | 1                            | 2.41        | 2.41      |
| LISDEXAMFETAMINE                 | 1205      | 68                           | 3,779.04    | 55.57     |
| METHYLPHENIDATE (DL;D;L;ISOMERS) | 1724      | 216                          | 15,225.04   | 70.49     |
| CODEINE                          | 9050      | 266                          | 7,263.10    | 27.30     |
| BUPRENORPHINE                    | 9064      | 259                          | 7,406.94    | 28.60     |
| OXYCODONE                        | 9143      | 393                          | 83,279.89   | 211.91    |
| HYDROMORPHONE                    | 9150      | 368                          | 7,485.37    | 20.34     |
| HYDROCODONE                      | 9193      | 394                          | 21,465.76   | 54.48     |
| MEPERIDINE (PETHIDINE)           | 9230      | 283                          | 9,118.00    | 32.22     |
| METHADONE                        | 9250B     | 253                          | 7,529.68    | 29.76     |
| MORPHINE                         | 9300      | 409                          | 38,704.98   | 94.63     |

|               |      |     |          |       |
|---------------|------|-----|----------|-------|
| OXYMORPHONE   | 9652 | 36  | 189.99   | 5.28  |
| TAPENTADOL    | 9780 | 63  | 3,492.05 | 55.43 |
| FENTANYL BASE | 9801 | 471 | 1,059.48 | 2.25  |

**BUSINESS ACTIVITY: C - PRACTITIONERS**

| DRUG NAME                        | DRUG CODE | NUMBER OF REGISTRANT SOLD TO | TOTAL GRAMS | AVG GRAMS |
|----------------------------------|-----------|------------------------------|-------------|-----------|
| AMPHETAMINE                      | 1100      | 5                            | 25.15       | 5.03      |
| LISDEXAMFETAMINE                 | 1205      | 2                            | 17.85       | 8.92      |
| METHYLPHENIDATE (DL;D;L;ISOMERS) | 1724      | 2                            | 102.48      | 51.24     |
| CODEINE                          | 9050      | 15                           | 636.14      | 42.41     |
| BUPRENORPHINE                    | 9064      | 935                          | 114.58      | 0.12      |
| OXYCODONE                        | 9143      | 26                           | 74.88       | 2.88      |
| HYDROMORPHONE                    | 9150      | 298                          | 151.66      | 0.51      |
| HYDROCODONE                      | 9193      | 279                          | 814.86      | 2.92      |
| MEPERIDINE (PETHIDINE)           | 9230      | 61                           | 518.22      | 8.50      |
| METHADONE                        | 9250B     | 9                            | 7.42        | 0.82      |
| MORPHINE                         | 9300      | 177                          | 348.52      | 1.97      |
| FENTANYL BASE                    | 9801      | 400                          | 29.96       | 0.07      |

**BUSINESS ACTIVITY: D - TEACHING INSTITUTIONS**

| DRUG NAME     | DRUG CODE | NUMBER OF REGISTRANT SOLD TO | TOTAL GRAMS | AVG GRAMS |
|---------------|-----------|------------------------------|-------------|-----------|
| BUPRENORPHINE | 9064      | 4                            | 0.14        | 0.04      |
| HYDROMORPHONE | 9150      | 2                            | 0.07        | 0.04      |
| FENTANYL BASE | 9801      | 1                            | 0.11        | 0.11      |

**BUSINESS ACTIVITY: M - MID-LEVEL PRACTITIONERS**

| DRUG NAME     | DRUG CODE | NUMBER OF REGISTRANT SOLD TO | TOTAL GRAMS | AVG GRAMS |
|---------------|-----------|------------------------------|-------------|-----------|
| BUPRENORPHINE | 9064      | 4                            | 5.41        | 1.35      |
| HYDROMORPHONE | 9150      | 3                            | 0.21        | 0.07      |
| MORPHINE      | 9300      | 46                           | 9.85        | 0.21      |
| FENTANYL BASE | 9801      | 125                          | 1.14        | 0.01      |

**BUSINESS ACTIVITY: NTP - NARCOTIC TREATMENT PROGRAMS**

| DRUG NAME     | DRUG CODE | NUMBER OF REGISTRANT SOLD TO | TOTAL GRAMS | AVG GRAMS |
|---------------|-----------|------------------------------|-------------|-----------|
| BUPRENORPHINE | 9064      | 29                           | 10,348.48   | 356.84    |
| METHADONE     | 9250B     | 30                           | 217,512.71  | 7,250.42  |

**STATE: OK - OKLAHOMA****BUSINESS ACTIVITY: A - PHARMACIES**

| DRUG NAME                        | DRUG CODE | NUMBER OF REGISTRANT SOLD TO | TOTAL GRAMS | AVG GRAMS |
|----------------------------------|-----------|------------------------------|-------------|-----------|
| AMPHETAMINE                      | 1100      | 837                          | 211,979.35  | 253.26    |
| METHAMPHETAMINE                  | 1105      | 20                           | 53.44       | 2.67      |
| LISDEXAMFETAMINE                 | 1205      | 811                          | 144,201.84  | 177.81    |
| METHYLPHENIDATE (DL;D;L;ISOMERS) | 1724      | 833                          | 177,797.35  | 213.44    |
| CODEINE                          | 9050      | 866                          | 317,177.90  | 366.26    |

|                        |       |     |            |        |
|------------------------|-------|-----|------------|--------|
| BUPRENORPHINE          | 9064  | 823 | 53,264.84  | 64.72  |
| OXYCODONE              | 9143  | 856 | 705,257.64 | 823.90 |
| HYDROMORPHONE          | 9150  | 732 | 10,588.52  | 14.47  |
| HYDROCODONE            | 9193  | 867 | 581,863.49 | 671.12 |
| MEPERIDINE (PETHIDINE) | 9230  | 561 | 16,574.19  | 29.54  |
| METHADONE              | 9250B | 681 | 22,776.25  | 33.45  |
| MORPHINE               | 9300  | 838 | 256,268.85 | 305.81 |
| OXYMORPHONE            | 9652  | 374 | 8,381.15   | 22.41  |
| TAPENTADOL             | 9780  | 546 | 62,260.50  | 114.03 |
| FENTANYL BASE          | 9801  | 823 | 4,199.90   | 5.10   |

**BUSINESS ACTIVITY: B - HOSPITALS**

| DRUG NAME                        | DRUG CODE | NUMBER OF REGISTRANT SOLD TO | TOTAL GRAMS | AVG GRAMS |
|----------------------------------|-----------|------------------------------|-------------|-----------|
| AMPHETAMINE                      | 1100      | 67                           | 7,100.17    | 105.97    |
| METHAMPHETAMINE                  | 1105      | 1                            | 1.21        | 1.21      |
| LISDEXAMFETAMINE                 | 1205      | 44                           | 4,371.48    | 99.35     |
| METHYLPHENIDATE (DL;D;L;ISOMERS) | 1724      | 95                           | 8,741.43    | 92.02     |
| CODEINE                          | 9050      | 153                          | 28,661.77   | 187.33    |
| BUPRENORPHINE                    | 9064      | 82                           | 1,357.80    | 16.56     |
| OXYCODONE                        | 9143      | 197                          | 28,953.64   | 146.97    |
| HYDROMORPHONE                    | 9150      | 170                          | 1,836.76    | 10.80     |
| HYDROCODONE                      | 9193      | 203                          | 34,678.94   | 170.83    |
| MEPERIDINE (PETHIDINE)           | 9230      | 148                          | 4,447.57    | 30.05     |
| METHADONE                        | 9250B     | 90                           | 1,455.46    | 16.17     |
| MORPHINE                         | 9300      | 202                          | 22,585.22   | 111.81    |
| OXYMORPHONE                      | 9652      | 11                           | 24.71       | 2.25      |
| TAPENTADOL                       | 9780      | 24                           | 685.50      | 28.56     |
| FENTANYL BASE                    | 9801      | 199                          | 434.51      | 2.18      |

**BUSINESS ACTIVITY: C - PRACTITIONERS**

| DRUG NAME              | DRUG CODE | NUMBER OF REGISTRANT SOLD TO | TOTAL GRAMS | AVG GRAMS |
|------------------------|-----------|------------------------------|-------------|-----------|
| AMPHETAMINE            | 1100      | 1                            | 0.99        | 0.99      |
| LISDEXAMFETAMINE       | 1205      | 4                            | 90.59       | 22.65     |
| CODEINE                | 9050      | 60                           | 2,248.78    | 37.48     |
| BUPRENORPHINE          | 9064      | 279                          | 368.68      | 1.32      |
| OXYCODONE              | 9143      | 11                           | 377.34      | 34.30     |
| HYDROMORPHONE          | 9150      | 58                           | 72.77       | 1.25      |
| HYDROCODONE            | 9193      | 68                           | 678.33      | 9.98      |
| MEPERIDINE (PETHIDINE) | 9230      | 37                           | 252.19      | 6.82      |
| METHADONE              | 9250B     | 6                            | 25.22       | 4.20      |
| MORPHINE               | 9300      | 76                           | 600.78      | 7.91      |
| FENTANYL BASE          | 9801      | 146                          | 13.21       | 0.09      |

**BUSINESS ACTIVITY: D - TEACHING INSTITUTIONS**

| DRUG NAME     | DRUG CODE | NUMBER OF REGISTRANT SOLD TO | TOTAL GRAMS | AVG GRAMS |
|---------------|-----------|------------------------------|-------------|-----------|
| BUPRENORPHINE | 9064      | 2                            | 0.56        | 0.28      |
| HYDROMORPHONE | 9150      | 1                            | 2.13        | 2.13      |
| HYDROCODONE   | 9193      | 1                            | 7.94        | 7.94      |
| METHADONE     | 9250B     | 1                            | 44.45       | 44.45     |
| MORPHINE      | 9300      | 1                            | 79.71       | 79.71     |
| FENTANYL BASE | 9801      | 1                            | 0.57        | 0.57      |

**BUSINESS ACTIVITY: M - MID-LEVEL PRACTITIONERS**

| DRUG NAME     | DRUG CODE | NUMBER OF REGISTRANT SOLD TO | TOTAL GRAMS | AVG GRAMS |
|---------------|-----------|------------------------------|-------------|-----------|
| CODEINE       | 9050      | 9                            | 7.36        | 0.82      |
| HYDROMORPHONE | 9150      | 11                           | 0.65        | 0.06      |
| MORPHINE      | 9300      | 31                           | 9.47        | 0.31      |
| FENTANYL BASE | 9801      | 54                           | 0.71        | 0.01      |

**BUSINESS ACTIVITY: NTP - NARCOTIC TREATMENT PROGRAMS**

| DRUG NAME     | DRUG CODE | NUMBER OF REGISTRANT SOLD TO | TOTAL GRAMS | AVG GRAMS |
|---------------|-----------|------------------------------|-------------|-----------|
| BUPRENORPHINE | 9064      | 12                           | 478.38      | 39.87     |
| METHADONE     | 9250B     | 19                           | 113,175.59  | 5,956.61  |

**STATE: OR - OREGON****BUSINESS ACTIVITY: A - PHARMACIES**

| DRUG NAME                        | DRUG CODE | NUMBER OF REGISTRANT SOLD TO | TOTAL GRAMS | AVG GRAMS |
|----------------------------------|-----------|------------------------------|-------------|-----------|
| AMPHETAMINE                      | 1100      | 661                          | 246,538.80  | 372.98    |
| METHAMPHETAMINE                  | 1105      | 29                           | 142.23      | 4.90      |
| LISDEXAMFETAMINE                 | 1205      | 622                          | 62,263.68   | 100.10    |
| METHYLPHENIDATE (DL;D;L;ISOMERS) | 1724      | 659                          | 241,072.10  | 365.82    |
| CODEINE                          | 9050      | 656                          | 113,489.59  | 173.00    |
| BUPRENORPHINE                    | 9064      | 658                          | 42,320.04   | 64.32     |
| OXYCODONE                        | 9143      | 673                          | 553,179.00  | 821.96    |
| HYDROMORPHONE                    | 9150      | 653                          | 13,332.12   | 20.42     |
| HYDROCODONE                      | 9193      | 674                          | 303,934.27  | 450.94    |
| MEPERIDINE (PETHIDINE)           | 9230      | 149                          | 3,353.75    | 22.51     |
| METHADONE                        | 9250B     | 622                          | 46,495.74   | 74.75     |
| MORPHINE                         | 9300      | 672                          | 217,003.99  | 322.92    |
| OXYMORPHONE                      | 9652      | 253                          | 3,695.52    | 14.61     |
| TAPENTADOL                       | 9780      | 303                          | 24,593.00   | 81.17     |
| FENTANYL BASE                    | 9801      | 620                          | 2,563.77    | 4.14      |

**BUSINESS ACTIVITY: B - HOSPITALS**

| DRUG NAME        | DRUG CODE | NUMBER OF REGISTRANT SOLD TO | TOTAL GRAMS | AVG GRAMS |
|------------------|-----------|------------------------------|-------------|-----------|
| AMPHETAMINE      | 1100      | 49                           | 3,371.34    | 68.80     |
| LISDEXAMFETAMINE | 1205      | 17                           | 471.73      | 27.75     |

|                                  |       |    |           |        |
|----------------------------------|-------|----|-----------|--------|
| METHYLPHENIDATE (DL;D;L;ISOMERS) | 1724  | 57 | 4,663.19  | 81.81  |
| CODEINE                          | 9050  | 83 | 3,439.39  | 41.44  |
| BUPRENORPHINE                    | 9064  | 66 | 1,257.55  | 19.05  |
| OXYCODONE                        | 9143  | 93 | 32,431.13 | 348.72 |
| HYDROMORPHONE                    | 9150  | 78 | 2,577.87  | 33.05  |
| HYDROCODONE                      | 9193  | 99 | 19,460.31 | 196.57 |
| MEPERIDINE (PETHIDINE)           | 9230  | 59 | 779.45    | 13.21  |
| METHADONE                        | 9250B | 66 | 3,190.22  | 48.34  |
| MORPHINE                         | 9300  | 93 | 19,639.33 | 211.18 |
| OXYMORPHONE                      | 9652  | 3  | 1.96      | 0.65   |
| TAPENTADOL                       | 9780  | 5  | 201.50    | 40.30  |
| FENTANYL BASE                    | 9801  | 80 | 302.93    | 3.79   |

**BUSINESS ACTIVITY: C - PRACTITIONERS**

| DRUG NAME                        | DRUG CODE | NUMBER OF REGISTRANT SOLD TO | TOTAL GRAMS | AVG GRAMS |
|----------------------------------|-----------|------------------------------|-------------|-----------|
| AMPHETAMINE                      | 1100      | 1                            | 11.23       | 11.23     |
| LISDEXAMFETAMINE                 | 1205      | 1                            | 2.98        | 2.98      |
| METHYLPHENIDATE (DL;D;L;ISOMERS) | 1724      | 2                            | 66.42       | 33.21     |
| CODEINE                          | 9050      | 63                           | 4,822.57    | 76.55     |
| BUPRENORPHINE                    | 9064      | 581                          | 155.27      | 0.27      |
| OXYCODONE                        | 9143      | 59                           | 168.63      | 2.86      |
| HYDROMORPHONE                    | 9150      | 352                          | 191.52      | 0.54      |
| HYDROCODONE                      | 9193      | 290                          | 776.72      | 2.68      |
| MEPERIDINE (PETHIDINE)           | 9230      | 74                           | 433.03      | 5.85      |
| METHADONE                        | 9250B     | 19                           | 35.87       | 1.89      |
| MORPHINE                         | 9300      | 216                          | 208.03      | 0.96      |
| FENTANYL BASE                    | 9801      | 381                          | 35.46       | 0.09      |

**BUSINESS ACTIVITY: D - TEACHING INSTITUTIONS**

| DRUG NAME     | DRUG CODE | NUMBER OF REGISTRANT SOLD TO | TOTAL GRAMS | AVG GRAMS |
|---------------|-----------|------------------------------|-------------|-----------|
| BUPRENORPHINE | 9064      | 1                            | 0.01        | 0.01      |
| FENTANYL BASE | 9801      | 1                            | 0.02        | 0.02      |

**BUSINESS ACTIVITY: M - MID-LEVEL PRACTITIONERS**

| DRUG NAME              | DRUG CODE | NUMBER OF REGISTRANT SOLD TO | TOTAL GRAMS | AVG GRAMS |
|------------------------|-----------|------------------------------|-------------|-----------|
| CODEINE                | 9050      | 4                            | 34.27       | 8.57      |
| BUPRENORPHINE          | 9064      | 6                            | 9.88        | 1.65      |
| HYDROMORPHONE          | 9150      | 2                            | 0.09        | 0.04      |
| HYDROCODONE            | 9193      | 8                            | 18.68       | 2.33      |
| MEPERIDINE (PETHIDINE) | 9230      | 1                            | 4.36        | 4.36      |
| MORPHINE               | 9300      | 5                            | 0.94        | 0.19      |
| FENTANYL BASE          | 9801      | 1                            | 0.01        | 0.01      |

**BUSINESS ACTIVITY: NTP - NARCOTIC TREATMENT PROGRAMS**

| DRUG NAME     | DRUG CODE | NUMBER OF REGISTRANT SOLD TO | TOTAL GRAMS | AVG GRAMS |
|---------------|-----------|------------------------------|-------------|-----------|
| BUPRENORPHINE | 9064      | 17                           | 5,431.90    | 319.52    |
| METHADONE     | 9250B     | 19                           | 177,792.41  | 9,357.50  |

**STATE: PA - PENNSYLVANIA****BUSINESS ACTIVITY: A - PHARMACIES**

| DRUG NAME                        | DRUG CODE | NUMBER OF REGISTRANT SOLD TO | TOTAL GRAMS  | AVG GRAMS |
|----------------------------------|-----------|------------------------------|--------------|-----------|
| AMPHETAMINE                      | 1100      | 2,915                        | 846,387.57   | 290.36    |
| METHAMPHETAMINE                  | 1105      | 80                           | 477.34       | 5.97      |
| LISDEXAMFETAMINE                 | 1205      | 2,708                        | 352,202.22   | 130.06    |
| METHYLPHENIDATE (DL;D;L;ISOMERS) | 1724      | 2,879                        | 858,323.24   | 298.13    |
| CODEINE                          | 9050      | 2,923                        | 418,698.30   | 143.24    |
| BUPRENORPHINE                    | 9064      | 2,758                        | 279,903.83   | 101.49    |
| OXYCODONE                        | 9143      | 2,980                        | 2,346,458.00 | 787.40    |
| HYDROMORPHONE                    | 9150      | 2,459                        | 39,924.92    | 16.24     |
| HYDROCODONE                      | 9193      | 2,959                        | 513,515.89   | 173.54    |
| MEPERIDINE (PETHIDINE)           | 9230      | 361                          | 9,475.82     | 26.25     |
| METHADONE                        | 9250B     | 2,168                        | 93,327.51    | 43.05     |
| MORPHINE                         | 9300      | 2,865                        | 703,926.41   | 245.70    |
| OXYMORPHONE                      | 9652      | 1,428                        | 49,103.96    | 34.39     |
| TAPENTADOL                       | 9780      | 1,502                        | 203,133.50   | 135.24    |
| FENTANYL BASE                    | 9801      | 2,759                        | 13,859.21    | 5.02      |

**BUSINESS ACTIVITY: B - HOSPITALS**

| DRUG NAME                        | DRUG CODE | NUMBER OF REGISTRANT SOLD TO | TOTAL GRAMS | AVG GRAMS |
|----------------------------------|-----------|------------------------------|-------------|-----------|
| AMPHETAMINE                      | 1100      | 172                          | 12,369.64   | 71.92     |
| LISDEXAMFETAMINE                 | 1205      | 64                           | 3,459.93    | 54.06     |
| METHYLPHENIDATE (DL;D;L;ISOMERS) | 1724      | 236                          | 12,745.42   | 54.01     |
| CODEINE                          | 9050      | 256                          | 12,932.42   | 50.52     |
| BUPRENORPHINE                    | 9064      | 215                          | 8,338.32    | 38.78     |
| OXYCODONE                        | 9143      | 325                          | 107,212.92  | 329.89    |
| HYDROMORPHONE                    | 9150      | 300                          | 9,219.66    | 30.73     |
| HYDROCODONE                      | 9193      | 288                          | 22,895.04   | 79.50     |
| MEPERIDINE (PETHIDINE)           | 9230      | 191                          | 1,913.29    | 10.02     |
| METHADONE                        | 9250B     | 245                          | 12,737.07   | 51.99     |
| MORPHINE                         | 9300      | 331                          | 57,164.89   | 172.70    |
| OXYMORPHONE                      | 9652      | 47                           | 505.29      | 10.75     |
| TAPENTADOL                       | 9780      | 52                           | 1,467.00    | 28.21     |
| FENTANYL BASE                    | 9801      | 357                          | 1,329.88    | 3.73      |

**BUSINESS ACTIVITY: C - PRACTITIONERS**

| DRUG NAME   | DRUG CODE | NUMBER OF REGISTRANT SOLD TO | TOTAL GRAMS | AVG GRAMS |
|-------------|-----------|------------------------------|-------------|-----------|
| AMPHETAMINE | 1100      | 1                            | 8.25        | 8.25      |

|                                  |       |       |           |       |
|----------------------------------|-------|-------|-----------|-------|
| METHAMPHETAMINE                  | 1105  | 1     | 4.02      | 4.02  |
| LISDEXAMFETAMINE                 | 1205  | 1     | 9.83      | 9.83  |
| METHYLPHENIDATE (DL;D;L;ISOMERS) | 1724  | 1     | 19.67     | 19.67 |
| CODEINE                          | 9050  | 217   | 12,163.25 | 56.05 |
| BUPRENORPHINE                    | 9064  | 1,034 | 865.15    | 0.84  |
| OXYCODONE                        | 9143  | 58    | 187.54    | 3.23  |
| HYDROMORPHONE                    | 9150  | 392   | 421.50    | 1.08  |
| HYDROCODONE                      | 9193  | 373   | 1,106.09  | 2.97  |
| MEPERIDINE (PETHIDINE)           | 9230  | 77    | 336.94    | 4.38  |
| METHADONE                        | 9250B | 41    | 151.24    | 3.69  |
| MORPHINE                         | 9300  | 241   | 298.89    | 1.24  |
| FENTANYL BASE                    | 9801  | 588   | 64.20     | 0.11  |

**BUSINESS ACTIVITY: D - TEACHING INSTITUTIONS**

| DRUG NAME     | DRUG CODE | NUMBER OF REGISTRANT SOLD TO | TOTAL GRAMS | AVG GRAMS |
|---------------|-----------|------------------------------|-------------|-----------|
| CODEINE       | 9050      | 1                            | 851.62      | 851.62    |
| BUPRENORPHINE | 9064      | 3                            | 1.42        | 0.47      |
| OXYCODONE     | 9143      | 1                            | 0.45        | 0.45      |
| HYDROMORPHONE | 9150      | 1                            | 3.31        | 3.31      |
| HYDROCODONE   | 9193      | 1                            | 54.40       | 54.40     |
| METHADONE     | 9250B     | 2                            | 33.81       | 16.90     |
| MORPHINE      | 9300      | 2                            | 37.60       | 18.80     |
| FENTANYL BASE | 9801      | 3                            | 2.81        | 0.94      |

**BUSINESS ACTIVITY: M - MID-LEVEL PRACTITIONERS**

| DRUG NAME | DRUG CODE | NUMBER OF REGISTRANT SOLD TO | TOTAL GRAMS | AVG GRAMS |
|-----------|-----------|------------------------------|-------------|-----------|
| CODEINE   | 9050      | 19                           | 23.94       | 1.26      |

**BUSINESS ACTIVITY: NTP - NARCOTIC TREATMENT PROGRAMS**

| DRUG NAME     | DRUG CODE | NUMBER OF REGISTRANT SOLD TO | TOTAL GRAMS | AVG GRAMS |
|---------------|-----------|------------------------------|-------------|-----------|
| BUPRENORPHINE | 9064      | 17                           | 841.44      | 49.50     |
| METHADONE     | 9250B     | 88                           | 607,839.16  | 6,907.26  |

**STATE: PR - PUERTO RICO****BUSINESS ACTIVITY: A - PHARMACIES**

| DRUG NAME                        | DRUG CODE | NUMBER OF REGISTRANT SOLD TO | TOTAL GRAMS | AVG GRAMS |
|----------------------------------|-----------|------------------------------|-------------|-----------|
| AMPHETAMINE                      | 1100      | 643                          | 37,734.02   | 58.68     |
| LISDEXAMFETAMINE                 | 1205      | 270                          | 8,477.84    | 31.40     |
| METHYLPHENIDATE (DL;D;L;ISOMERS) | 1724      | 683                          | 57,151.20   | 83.68     |
| CODEINE                          | 9050      | 1,002                        | 43,411.89   | 43.33     |
| BUPRENORPHINE                    | 9064      | 267                          | 7,885.10    | 29.53     |
| OXYCODONE                        | 9143      | 785                          | 39,157.21   | 49.88     |
| HYDROMORPHONE                    | 9150      | 27                           | 138.13      | 5.12      |
| HYDROCODONE                      | 9193      | 462                          | 1,695.86    | 3.67      |

|                        |       |     |          |       |
|------------------------|-------|-----|----------|-------|
| MEPERIDINE (PETHIDINE) | 9230  | 644 | 4,500.75 | 6.99  |
| METHADONE              | 9250B | 9   | 193.37   | 21.49 |
| MORPHINE               | 9300  | 135 | 3,933.12 | 29.13 |
| TAPENTADOL             | 9780  | 42  | 1,403.00 | 33.40 |
| FENTANYL BASE          | 9801  | 674 | 370.67   | 0.55  |

**BUSINESS ACTIVITY: B - HOSPITALS**

| DRUG NAME                        | DRUG CODE | NUMBER OF REGISTRANT SOLD TO | TOTAL GRAMS | AVG GRAMS |
|----------------------------------|-----------|------------------------------|-------------|-----------|
| AMPHETAMINE                      | 1100      | 7                            | 121.57      | 17.37     |
| METHYLPHENIDATE (DL;D;L;ISOMERS) | 1724      | 19                           | 238.78      | 12.57     |
| CODEINE                          | 9050      | 75                           | 3,487.54    | 46.50     |
| BUPRENORPHINE                    | 9064      | 22                           | 614.11      | 27.91     |
| OXYCODONE                        | 9143      | 65                           | 5,173.70    | 79.60     |
| HYDROMORPHONE                    | 9150      | 4                            | 91.54       | 22.89     |
| HYDROCODONE                      | 9193      | 25                           | 144.79      | 5.79      |
| MEPERIDINE (PETHIDINE)           | 9230      | 90                           | 7,932.28    | 88.14     |
| METHADONE                        | 9250B     | 4                            | 99.64       | 24.91     |
| MORPHINE                         | 9300      | 78                           | 2,901.18    | 37.19     |
| TAPENTADOL                       | 9780      | 4                            | 553.00      | 138.25    |
| FENTANYL BASE                    | 9801      | 82                           | 117.24      | 1.43      |

**BUSINESS ACTIVITY: C - PRACTITIONERS**

| DRUG NAME              | DRUG CODE | NUMBER OF REGISTRANT SOLD TO | TOTAL GRAMS | AVG GRAMS |
|------------------------|-----------|------------------------------|-------------|-----------|
| BUPRENORPHINE          | 9064      | 20                           | 1.91        | 0.10      |
| MEPERIDINE (PETHIDINE) | 9230      | 4                            | 49.57       | 12.39     |
| MORPHINE               | 9300      | 1                            | 0.75        | 0.75      |
| FENTANYL BASE          | 9801      | 10                           | 0.90        | 0.09      |

**BUSINESS ACTIVITY: NTP - NARCOTIC TREATMENT PROGRAMS**

| DRUG NAME | DRUG CODE | NUMBER OF REGISTRANT SOLD TO | TOTAL GRAMS | AVG GRAMS |
|-----------|-----------|------------------------------|-------------|-----------|
| METHADONE | 9250B     | 5                            | 86,542.14   | 17,308.43 |

**STATE: RI - RHODE ISLAND****BUSINESS ACTIVITY: A - PHARMACIES**

| DRUG NAME                        | DRUG CODE | NUMBER OF REGISTRANT SOLD TO | TOTAL GRAMS | AVG GRAMS |
|----------------------------------|-----------|------------------------------|-------------|-----------|
| AMPHETAMINE                      | 1100      | 235                          | 151,923.64  | 646.48    |
| METHAMPHETAMINE                  | 1105      | 7                            | 14.87       | 2.12      |
| LISDEXAMFETAMINE                 | 1205      | 219                          | 29,018.31   | 132.50    |
| METHYLPHENIDATE (DL;D;L;ISOMERS) | 1724      | 227                          | 69,766.29   | 307.34    |
| CODEINE                          | 9050      | 209                          | 22,399.55   | 107.17    |
| BUPRENORPHINE                    | 9064      | 233                          | 31,350.23   | 134.55    |
| OXYCODONE                        | 9143      | 234                          | 125,578.21  | 536.66    |
| HYDROMORPHONE                    | 9150      | 180                          | 2,138.57    | 11.88     |
| HYDROCODONE                      | 9193      | 234                          | 32,479.06   | 138.80    |



|                        |       |     |           |        |
|------------------------|-------|-----|-----------|--------|
| MEPERIDINE (PETHIDINE) | 9230  | 18  | 424.86    | 23.60  |
| METHADONE              | 9250B | 165 | 5,418.10  | 32.84  |
| MORPHINE               | 9300  | 223 | 33,476.48 | 150.12 |
| OXYMORPHONE            | 9652  | 58  | 680.40    | 11.73  |
| TAPENTADOL             | 9780  | 96  | 7,568.50  | 78.84  |
| FENTANYL BASE          | 9801  | 200 | 477.05    | 2.39   |

**BUSINESS ACTIVITY: B - HOSPITALS**

| DRUG NAME                        | DRUG CODE | NUMBER OF REGISTRANT SOLD TO | TOTAL GRAMS | AVG GRAMS |
|----------------------------------|-----------|------------------------------|-------------|-----------|
| AMPHETAMINE                      | 1100      | 16                           | 2,592.30    | 162.02    |
| LISDEXAMFETAMINE                 | 1205      | 7                            | 439.93      | 62.85     |
| METHYLPHENIDATE (DL;D;L;ISOMERS) | 1724      | 20                           | 2,771.40    | 138.57    |
| CODEINE                          | 9050      | 16                           | 613.68      | 38.36     |
| BUPRENORPHINE                    | 9064      | 15                           | 690.12      | 46.01     |
| OXYCODONE                        | 9143      | 22                           | 8,336.33    | 378.92    |
| HYDROMORPHONE                    | 9150      | 17                           | 577.00      | 33.94     |
| HYDROCODONE                      | 9193      | 21                           | 1,778.79    | 84.70     |
| MEPERIDINE (PETHIDINE)           | 9230      | 12                           | 160.14      | 13.34     |
| METHADONE                        | 9250B     | 14                           | 1,453.31    | 103.81    |
| MORPHINE                         | 9300      | 19                           | 4,447.76    | 234.09    |
| OXYMORPHONE                      | 9652      | 1                            | 0.89        | 0.89      |
| FENTANYL BASE                    | 9801      | 16                           | 90.64       | 5.66      |

**BUSINESS ACTIVITY: C - PRACTITIONERS**

| DRUG NAME              | DRUG CODE | NUMBER OF REGISTRANT SOLD TO | TOTAL GRAMS | AVG GRAMS |
|------------------------|-----------|------------------------------|-------------|-----------|
| BUPRENORPHINE          | 9064      | 81                           | 7.99        | 0.10      |
| OXYCODONE              | 9143      | 3                            | 7.35        | 2.45      |
| HYDROMORPHONE          | 9150      | 37                           | 33.20       | 0.90      |
| HYDROCODONE            | 9193      | 27                           | 91.55       | 3.39      |
| MEPERIDINE (PETHIDINE) | 9230      | 8                            | 72.99       | 9.12      |
| METHADONE              | 9250B     | 2                            | 11.63       | 5.81      |
| MORPHINE               | 9300      | 12                           | 15.51       | 1.29      |
| FENTANYL BASE          | 9801      | 37                           | 7.28        | 0.20      |

**BUSINESS ACTIVITY: NTP - NARCOTIC TREATMENT PROGRAMS**

| DRUG NAME     | DRUG CODE | NUMBER OF REGISTRANT SOLD TO | TOTAL GRAMS | AVG GRAMS |
|---------------|-----------|------------------------------|-------------|-----------|
| BUPRENORPHINE | 9064      | 15                           | 643.40      | 42.89     |
| METHADONE     | 9250B     | 21                           | 162,267.95  | 7,727.05  |

**STATE: SC - SOUTH CAROLINA****BUSINESS ACTIVITY: A - PHARMACIES**

| DRUG NAME       | DRUG CODE | NUMBER OF REGISTRANT SOLD TO | TOTAL GRAMS | AVG GRAMS |
|-----------------|-----------|------------------------------|-------------|-----------|
| AMPHETAMINE     | 1100      | 1,193                        | 548,608.65  | 459.86    |
| METHAMPHETAMINE | 1105      | 23                           | 59.07       | 2.57      |

|                                  |       |       |            |        |
|----------------------------------|-------|-------|------------|--------|
| LISDEXAMFETAMINE                 | 1205  | 1,163 | 241,631.35 | 207.77 |
| METHYLPHENIDATE (DL;D;L;ISOMERS) | 1724  | 1,187 | 331,277.49 | 279.09 |
| CODEINE                          | 9050  | 1,144 | 276,075.42 | 241.32 |
| BUPRENORPHINE                    | 9064  | 1,107 | 48,453.32  | 43.77  |
| OXYCODONE                        | 9143  | 1,196 | 747,107.15 | 624.67 |
| HYDROMORPHONE                    | 9150  | 1,063 | 16,444.97  | 15.47  |
| HYDROCODONE                      | 9193  | 1,208 | 443,187.66 | 366.88 |
| MEPERIDINE (PETHIDINE)           | 9230  | 638   | 13,826.46  | 21.67  |
| METHADONE                        | 9250B | 901   | 31,248.99  | 34.68  |
| MORPHINE                         | 9300  | 1,155 | 212,957.89 | 184.38 |
| OXYMORPHONE                      | 9652  | 599   | 12,424.63  | 20.74  |
| TAPENTADOL                       | 9780  | 894   | 140,171.00 | 156.79 |
| FENTANYL BASE                    | 9801  | 1,127 | 3,674.56   | 3.26   |

**BUSINESS ACTIVITY: B - HOSPITALS**

| DRUG NAME                        | DRUG CODE | NUMBER OF REGISTRANT SOLD TO | TOTAL GRAMS | AVG GRAMS |
|----------------------------------|-----------|------------------------------|-------------|-----------|
| AMPHETAMINE                      | 1100      | 59                           | 9,124.96    | 154.66    |
| METHAMPHETAMINE                  | 1105      | 1                            | 13.66       | 13.66     |
| LISDEXAMFETAMINE                 | 1205      | 24                           | 1,601.34    | 66.72     |
| METHYLPHENIDATE (DL;D;L;ISOMERS) | 1724      | 78                           | 8,768.76    | 112.42    |
| CODEINE                          | 9050      | 85                           | 4,596.76    | 54.08     |
| BUPRENORPHINE                    | 9064      | 66                           | 1,137.26    | 17.23     |
| OXYCODONE                        | 9143      | 137                          | 27,182.95   | 198.42    |
| HYDROMORPHONE                    | 9150      | 137                          | 2,855.93    | 20.85     |
| HYDROCODONE                      | 9193      | 140                          | 12,998.16   | 92.84     |
| MEPERIDINE (PETHIDINE)           | 9230      | 101                          | 2,880.63    | 28.52     |
| METHADONE                        | 9250B     | 79                           | 1,884.41    | 23.85     |
| MORPHINE                         | 9300      | 144                          | 18,920.34   | 131.39    |
| OXYMORPHONE                      | 9652      | 5                            | 10.26       | 2.05      |
| TAPENTADOL                       | 9780      | 31                           | 1,060.00    | 34.19     |
| FENTANYL BASE                    | 9801      | 171                          | 389.57      | 2.28      |

**BUSINESS ACTIVITY: C - PRACTITIONERS**

| DRUG NAME              | DRUG CODE | NUMBER OF REGISTRANT SOLD TO | TOTAL GRAMS | AVG GRAMS |
|------------------------|-----------|------------------------------|-------------|-----------|
| AMPHETAMINE            | 1100      | 3                            | 23.73       | 7.91      |
| LISDEXAMFETAMINE       | 1205      | 2                            | 59.46       | 29.73     |
| CODEINE                | 9050      | 16                           | 302.27      | 18.89     |
| BUPRENORPHINE          | 9064      | 427                          | 70.17       | 0.16      |
| OXYCODONE              | 9143      | 8                            | 24.25       | 3.03      |
| HYDROMORPHONE          | 9150      | 132                          | 120.55      | 0.91      |
| HYDROCODONE            | 9193      | 74                           | 181.43      | 2.45      |
| MEPERIDINE (PETHIDINE) | 9230      | 65                           | 558.85      | 8.60      |

|               |       |     |       |      |
|---------------|-------|-----|-------|------|
| METHADONE     | 9250B | 4   | 1.79  | 0.45 |
| MORPHINE      | 9300  | 79  | 91.73 | 1.16 |
| FENTANYL BASE | 9801  | 237 | 11.46 | 0.05 |

**BUSINESS ACTIVITY: D - TEACHING INSTITUTIONS**

| DRUG NAME     | DRUG CODE | NUMBER OF REGISTRANT SOLD TO | TOTAL GRAMS | AVG GRAMS |
|---------------|-----------|------------------------------|-------------|-----------|
| BUPRENORPHINE | 9064      | 1                            | 0.04        | 0.04      |
| HYDROMORPHONE | 9150      | 1                            | 0.18        | 0.18      |

**BUSINESS ACTIVITY: M - MID-LEVEL PRACTITIONERS**

| DRUG NAME     | DRUG CODE | NUMBER OF REGISTRANT SOLD TO | TOTAL GRAMS | AVG GRAMS |
|---------------|-----------|------------------------------|-------------|-----------|
| CODEINE       | 9050      | 1                            | 0.43        | 0.43      |
| MORPHINE      | 9300      | 52                           | 22.13       | 0.43      |
| FENTANYL BASE | 9801      | 62                           | 0.75        | 0.01      |

**BUSINESS ACTIVITY: NTP - NARCOTIC TREATMENT PROGRAMS**

| DRUG NAME     | DRUG CODE | NUMBER OF REGISTRANT SOLD TO | TOTAL GRAMS | AVG GRAMS |
|---------------|-----------|------------------------------|-------------|-----------|
| BUPRENORPHINE | 9064      | 11                           | 1,357.15    | 123.38    |
| METHADONE     | 9250B     | 21                           | 165,926.85  | 7,901.28  |

**STATE: SD - SOUTH DAKOTA****BUSINESS ACTIVITY: A - PHARMACIES**

| DRUG NAME                        | DRUG CODE | NUMBER OF REGISTRANT SOLD TO | TOTAL GRAMS | AVG GRAMS |
|----------------------------------|-----------|------------------------------|-------------|-----------|
| AMPHETAMINE                      | 1100      | 190                          | 58,518.84   | 307.99    |
| METHAMPHETAMINE                  | 1105      | 5                            | 30.94       | 6.19      |
| LISDEXAMFETAMINE                 | 1205      | 186                          | 40,406.30   | 217.24    |
| METHYLPHENIDATE (DL;D;L;ISOMERS) | 1724      | 190                          | 78,199.50   | 411.58    |
| CODEINE                          | 9050      | 191                          | 20,546.13   | 107.57    |
| BUPRENORPHINE                    | 9064      | 140                          | 2,015.75    | 14.40     |
| OXYCODONE                        | 9143      | 190                          | 50,827.46   | 267.51    |
| HYDROMORPHONE                    | 9150      | 162                          | 1,372.98    | 8.48      |
| HYDROCODONE                      | 9193      | 193                          | 39,730.53   | 205.86    |
| MEPERIDINE (PETHIDINE)           | 9230      | 43                           | 1,072.49    | 24.94     |
| METHADONE                        | 9250B     | 144                          | 3,955.31    | 27.47     |
| MORPHINE                         | 9300      | 187                          | 22,506.22   | 120.35    |
| OXYMORPHONE                      | 9652      | 50                           | 1,136.13    | 22.72     |
| TAPENTADOL                       | 9780      | 131                          | 14,280.00   | 109.01    |
| FENTANYL BASE                    | 9801      | 188                          | 773.81      | 4.12      |

**BUSINESS ACTIVITY: B - HOSPITALS**

| DRUG NAME                        | DRUG CODE | NUMBER OF REGISTRANT SOLD TO | TOTAL GRAMS | AVG GRAMS |
|----------------------------------|-----------|------------------------------|-------------|-----------|
| AMPHETAMINE                      | 1100      | 26                           | 2,652.71    | 102.03    |
| METHAMPHETAMINE                  | 1105      | 1                            | 0.40        | 0.40      |
| LISDEXAMFETAMINE                 | 1205      | 17                           | 576.94      | 33.94     |
| METHYLPHENIDATE (DL;D;L;ISOMERS) | 1724      | 35                           | 3,498.36    | 99.95     |

|                        |       |    |          |        |
|------------------------|-------|----|----------|--------|
| CODEINE                | 9050  | 49 | 2,248.27 | 45.88  |
| BUPRENORPHINE          | 9064  | 22 | 286.88   | 13.04  |
| OXYCODONE              | 9143  | 69 | 5,811.36 | 84.22  |
| HYDROMORPHONE          | 9150  | 61 | 548.88   | 9.00   |
| HYDROCODONE            | 9193  | 72 | 8,032.20 | 111.56 |
| MEPERIDINE (PETHIDINE) | 9230  | 36 | 517.13   | 14.36  |
| METHADONE              | 9250B | 27 | 337.01   | 12.48  |
| MORPHINE               | 9300  | 74 | 6,121.85 | 82.73  |
| OXYMORPHONE            | 9652  | 7  | 17.93    | 2.56   |
| TAPENTADOL             | 9780  | 16 | 588.00   | 36.75  |
| FENTANYL BASE          | 9801  | 72 | 129.45   | 1.80   |

**BUSINESS ACTIVITY: C - PRACTITIONERS**

| DRUG NAME              | DRUG CODE | NUMBER OF REGISTRANT SOLD TO | TOTAL GRAMS | AVG GRAMS |
|------------------------|-----------|------------------------------|-------------|-----------|
| CODEINE                | 9050      | 3                            | 55.43       | 18.48     |
| BUPRENORPHINE          | 9064      | 65                           | 2.30        | 0.04      |
| OXYCODONE              | 9143      | 3                            | 2.69        | 0.90      |
| HYDROMORPHONE          | 9150      | 24                           | 56.10       | 2.34      |
| HYDROCODONE            | 9193      | 27                           | 69.20       | 2.56      |
| MEPERIDINE (PETHIDINE) | 9230      | 9                            | 293.59      | 32.62     |
| MORPHINE               | 9300      | 19                           | 51.34       | 2.70      |
| FENTANYL BASE          | 9801      | 45                           | 4.58        | 0.10      |

**BUSINESS ACTIVITY: D - TEACHING INSTITUTIONS**

| DRUG NAME     | DRUG CODE | NUMBER OF REGISTRANT SOLD TO | TOTAL GRAMS | AVG GRAMS |
|---------------|-----------|------------------------------|-------------|-----------|
| BUPRENORPHINE | 9064      | 1                            | 0.00        | 0.00      |

**BUSINESS ACTIVITY: M - MID-LEVEL PRACTITIONERS**

| DRUG NAME     | DRUG CODE | NUMBER OF REGISTRANT SOLD TO | TOTAL GRAMS | AVG GRAMS |
|---------------|-----------|------------------------------|-------------|-----------|
| HYDROMORPHONE | 9150      | 4                            | 0.35        | 0.09      |
| MORPHINE      | 9300      | 4                            | 1.50        | 0.38      |
| FENTANYL BASE | 9801      | 6                            | 0.15        | 0.03      |

**BUSINESS ACTIVITY: NTP - NARCOTIC TREATMENT PROGRAMS**

| DRUG NAME | DRUG CODE | NUMBER OF REGISTRANT SOLD TO | TOTAL GRAMS | AVG GRAMS |
|-----------|-----------|------------------------------|-------------|-----------|
| METHADONE | 9250B     | 1                            | 3,298.55    | 3,298.55  |

**STATE: TN - TENNESSEE****BUSINESS ACTIVITY: A - PHARMACIES**

| DRUG NAME                        | DRUG CODE | NUMBER OF REGISTRANT SOLD TO | TOTAL GRAMS | AVG GRAMS |
|----------------------------------|-----------|------------------------------|-------------|-----------|
| AMPHETAMINE                      | 1100      | 1,529                        | 532,953.09  | 348.56    |
| METHAMPHETAMINE                  | 1105      | 18                           | 59.07       | 3.28      |
| LISDEXAMFETAMINE                 | 1205      | 1,486                        | 266,131.23  | 179.09    |
| METHYLPHENIDATE (DL;D;L;ISOMERS) | 1724      | 1,515                        | 316,032.55  | 208.60    |
| CODEINE                          | 9050      | 1,481                        | 261,657.33  | 176.68    |

|                        |       |       |              |        |
|------------------------|-------|-------|--------------|--------|
| BUPRENORPHINE          | 9064  | 1,398 | 150,298.47   | 107.51 |
| OXYCODONE              | 9143  | 1,541 | 1,531,351.74 | 993.74 |
| HYDROMORPHONE          | 9150  | 1,293 | 17,742.17    | 13.72  |
| HYDROCODONE            | 9193  | 1,550 | 785,658.83   | 506.88 |
| MEPERIDINE (PETHIDINE) | 9230  | 883   | 17,462.14    | 19.78  |
| METHADONE              | 9250B | 994   | 32,986.01    | 33.19  |
| MORPHINE               | 9300  | 1,521 | 486,216.20   | 319.67 |
| OXYMORPHONE            | 9652  | 892   | 49,790.20    | 55.82  |
| TAPENTADOL             | 9780  | 1,077 | 101,743.00   | 94.47  |
| FENTANYL BASE          | 9801  | 1,447 | 5,277.34     | 3.65   |

**BUSINESS ACTIVITY: B - HOSPITALS**

| DRUG NAME                        | DRUG CODE | NUMBER OF REGISTRANT SOLD TO | TOTAL GRAMS | AVG GRAMS |
|----------------------------------|-----------|------------------------------|-------------|-----------|
| AMPHETAMINE                      | 1100      | 82                           | 5,885.02    | 71.77     |
| LISDEXAMFETAMINE                 | 1205      | 39                           | 2,567.92    | 65.84     |
| METHYLPHENIDATE (DL;D;L;ISOMERS) | 1724      | 116                          | 4,819.11    | 41.54     |
| CODEINE                          | 9050      | 133                          | 4,060.05    | 30.53     |
| BUPRENORPHINE                    | 9064      | 130                          | 2,467.06    | 18.98     |
| OXYCODONE                        | 9143      | 183                          | 66,993.77   | 366.09    |
| HYDROMORPHONE                    | 9150      | 170                          | 4,060.64    | 23.89     |
| HYDROCODONE                      | 9193      | 197                          | 39,592.99   | 200.98    |
| MEPERIDINE (PETHIDINE)           | 9230      | 136                          | 3,671.61    | 27.00     |
| METHADONE                        | 9250B     | 136                          | 1,980.34    | 14.56     |
| MORPHINE                         | 9300      | 189                          | 30,439.08   | 161.05    |
| OXYMORPHONE                      | 9652      | 23                           | 74.62       | 3.24      |
| TAPENTADOL                       | 9780      | 36                           | 1,727.50    | 47.99     |
| FENTANYL BASE                    | 9801      | 177                          | 656.38      | 3.71      |

**BUSINESS ACTIVITY: C - PRACTITIONERS**

| DRUG NAME                        | DRUG CODE | NUMBER OF REGISTRANT SOLD TO | TOTAL GRAMS | AVG GRAMS |
|----------------------------------|-----------|------------------------------|-------------|-----------|
| AMPHETAMINE                      | 1100      | 11                           | 1,068.75    | 97.16     |
| LISDEXAMFETAMINE                 | 1205      | 7                            | 832.20      | 118.89    |
| METHYLPHENIDATE (DL;D;L;ISOMERS) | 1724      | 3                            | 312.86      | 104.29    |
| CODEINE                          | 9050      | 56                           | 3,191.58    | 56.99     |
| BUPRENORPHINE                    | 9064      | 585                          | 63.27       | 0.11      |
| OXYCODONE                        | 9143      | 85                           | 529.87      | 6.23      |
| HYDROMORPHONE                    | 9150      | 245                          | 188.54      | 0.77      |
| HYDROCODONE                      | 9193      | 283                          | 1,088.69    | 3.85      |
| MEPERIDINE (PETHIDINE)           | 9230      | 131                          | 914.53      | 6.98      |
| METHADONE                        | 9250B     | 6                            | 12.16       | 2.03      |
| MORPHINE                         | 9300      | 172                          | 185.39      | 1.08      |
| FENTANYL BASE                    | 9801      | 429                          | 41.05       | 0.10      |

**BUSINESS ACTIVITY: D - TEACHING INSTITUTIONS**

| DRUG NAME     | DRUG CODE | NUMBER OF REGISTRANT SOLD TO | TOTAL GRAMS | AVG GRAMS |
|---------------|-----------|------------------------------|-------------|-----------|
| BUPRENORPHINE | 9064      | 1                            | 0.02        | 0.02      |
| FENTANYL BASE | 9801      | 1                            | 0.01        | 0.01      |

**BUSINESS ACTIVITY: M - MID-LEVEL PRACTITIONERS**

| DRUG NAME              | DRUG CODE | NUMBER OF REGISTRANT SOLD TO | TOTAL GRAMS | AVG GRAMS |
|------------------------|-----------|------------------------------|-------------|-----------|
| AMPHETAMINE            | 1100      | 1                            | 1.56        | 1.56      |
| CODEINE                | 9050      | 3                            | 51.22       | 17.07     |
| HYDROMORPHONE          | 9150      | 3                            | 0.40        | 0.13      |
| HYDROCODONE            | 9193      | 1                            | 1.21        | 1.21      |
| MEPERIDINE (PETHIDINE) | 9230      | 7                            | 15.25       | 2.18      |
| MORPHINE               | 9300      | 65                           | 26.88       | 0.41      |
| FENTANYL BASE          | 9801      | 85                           | 1.55        | 0.02      |

**BUSINESS ACTIVITY: NTP - NARCOTIC TREATMENT PROGRAMS**

| DRUG NAME     | DRUG CODE | NUMBER OF REGISTRANT SOLD TO | TOTAL GRAMS | AVG GRAMS |
|---------------|-----------|------------------------------|-------------|-----------|
| BUPRENORPHINE | 9064      | 12                           | 938.58      | 78.22     |
| METHADONE     | 9250B     | 13                           | 157,981.45  | 12,152.42 |

**STATE: TX - TEXAS****BUSINESS ACTIVITY: A - PHARMACIES**

| DRUG NAME                        | DRUG CODE | NUMBER OF REGISTRANT SOLD TO | TOTAL GRAMS  | AVG GRAMS |
|----------------------------------|-----------|------------------------------|--------------|-----------|
| AMPHETAMINE                      | 1100      | 4,607                        | 1,743,754.07 | 378.50    |
| METHAMPHETAMINE                  | 1105      | 149                          | 424.31       | 2.85      |
| LISDEXAMFETAMINE                 | 1205      | 4,404                        | 1,055,317.50 | 239.63    |
| METHYLPHENIDATE (DL;D;L;ISOMERS) | 1724      | 4,546                        | 1,235,718.65 | 271.83    |
| CODEINE                          | 9050      | 4,960                        | 3,550,465.50 | 715.82    |
| BUPRENORPHINE                    | 9064      | 4,181                        | 108,166.38   | 25.87     |
| OXYCODONE                        | 9143      | 4,534                        | 1,136,473.23 | 250.66    |
| HYDROMORPHONE                    | 9150      | 3,894                        | 65,454.01    | 16.81     |
| HYDROCODONE                      | 9193      | 4,943                        | 2,202,422.66 | 445.56    |
| MEPERIDINE (PETHIDINE)           | 9230      | 904                          | 15,463.42    | 17.11     |
| METHADONE                        | 9250B     | 3,376                        | 112,154.00   | 33.22     |
| MORPHINE                         | 9300      | 4,317                        | 621,261.52   | 143.91    |
| OXYMORPHONE                      | 9652      | 1,197                        | 17,889.68    | 14.95     |
| TAPENTADOL                       | 9780      | 2,609                        | 296,937.00   | 113.81    |
| FENTANYL BASE                    | 9801      | 4,270                        | 15,267.69    | 3.58      |

**BUSINESS ACTIVITY: B - HOSPITALS**

| DRUG NAME                        | DRUG CODE | NUMBER OF REGISTRANT SOLD TO | TOTAL GRAMS | AVG GRAMS |
|----------------------------------|-----------|------------------------------|-------------|-----------|
| AMPHETAMINE                      | 1100      | 290                          | 37,402.57   | 128.97    |
| LISDEXAMFETAMINE                 | 1205      | 129                          | 9,553.10    | 74.06     |
| METHYLPHENIDATE (DL;D;L;ISOMERS) | 1724      | 430                          | 47,403.08   | 110.24    |

|                        |       |       |            |        |
|------------------------|-------|-------|------------|--------|
| CODEINE                | 9050  | 919   | 106,420.75 | 115.80 |
| BUPRENORPHINE          | 9064  | 325   | 4,357.23   | 13.41  |
| OXYCODONE              | 9143  | 758   | 54,821.55  | 72.32  |
| HYDROMORPHONE          | 9150  | 1,091 | 13,123.44  | 12.03  |
| HYDROCODONE            | 9193  | 1,215 | 126,889.29 | 104.44 |
| MEPERIDINE (PETHIDINE) | 9230  | 773   | 23,416.62  | 30.29  |
| METHADONE              | 9250B | 500   | 10,120.42  | 20.24  |
| MORPHINE               | 9300  | 1,298 | 85,808.09  | 66.11  |
| OXYMORPHONE            | 9652  | 35    | 339.86     | 9.71   |
| TAPENTADOL             | 9780  | 93    | 4,826.45   | 51.90  |
| FENTANYL BASE          | 9801  | 1,325 | 2,600.86   | 1.96   |

**BUSINESS ACTIVITY: C - PRACTITIONERS**

| DRUG NAME                        | DRUG CODE | NUMBER OF REGISTRANT SOLD TO | TOTAL GRAMS | AVG GRAMS |
|----------------------------------|-----------|------------------------------|-------------|-----------|
| AMPHETAMINE                      | 1100      | 8                            | 31.39       | 3.92      |
| LISDEXAMFETAMINE                 | 1205      | 6                            | 77.48       | 12.91     |
| METHYLPHENIDATE (DL;D;L;ISOMERS) | 1724      | 5                            | 510.12      | 102.02    |
| CODEINE                          | 9050      | 393                          | 4,159.69    | 10.58     |
| BUPRENORPHINE                    | 9064      | 2,060                        | 614.22      | 0.30      |
| OXYCODONE                        | 9143      | 17                           | 61.77       | 3.63      |
| HYDROMORPHONE                    | 9150      | 613                          | 481.42      | 0.79      |
| HYDROCODONE                      | 9193      | 856                          | 2,030.34    | 2.37      |
| MEPERIDINE (PETHIDINE)           | 9230      | 372                          | 2,969.32    | 7.98      |
| METHADONE                        | 9250B     | 31                           | 63.86       | 2.06      |
| MORPHINE                         | 9300      | 463                          | 515.96      | 1.11      |
| OXYMORPHONE                      | 9652      | 1                            | 8.03        | 8.03      |
| TAPENTADOL                       | 9780      | 1                            | 15.00       | 15.00     |
| FENTANYL BASE                    | 9801      | 1,323                        | 83.76       | 0.06      |

**BUSINESS ACTIVITY: D - TEACHING INSTITUTIONS**

| DRUG NAME              | DRUG CODE | NUMBER OF REGISTRANT SOLD TO | TOTAL GRAMS | AVG GRAMS |
|------------------------|-----------|------------------------------|-------------|-----------|
| BUPRENORPHINE          | 9064      | 3                            | 0.94        | 0.31      |
| HYDROMORPHONE          | 9150      | 1                            | 5.04        | 5.04      |
| HYDROCODONE            | 9193      | 1                            | 2.96        | 2.96      |
| MEPERIDINE (PETHIDINE) | 9230      | 1                            | 2.18        | 2.18      |
| METHADONE              | 9250B     | 1                            | 6.98        | 6.98      |
| MORPHINE               | 9300      | 2                            | 7.51        | 3.75      |
| FENTANYL BASE          | 9801      | 3                            | 2.74        | 0.91      |

**BUSINESS ACTIVITY: M - MID-LEVEL PRACTITIONERS**

| DRUG NAME     | DRUG CODE | NUMBER OF REGISTRANT SOLD TO | TOTAL GRAMS | AVG GRAMS |
|---------------|-----------|------------------------------|-------------|-----------|
| CODEINE       | 9050      | 71                           | 73.68       | 1.04      |
| BUPRENORPHINE | 9064      | 1                            | 0.00        | 0.00      |

|                        |      |     |        |      |
|------------------------|------|-----|--------|------|
| HYDROMORPHONE          | 9150 | 15  | 1.32   | 0.09 |
| HYDROCODONE            | 9193 | 1   | 1.21   | 1.21 |
| MEPERIDINE (PETHIDINE) | 9230 | 4   | 13.62  | 3.40 |
| MORPHINE               | 9300 | 321 | 129.27 | 0.40 |
| FENTANYL BASE          | 9801 | 589 | 33.11  | 0.06 |

**BUSINESS ACTIVITY: NTP - NARCOTIC TREATMENT PROGRAMS**

| DRUG NAME     | DRUG CODE | NUMBER OF REGISTRANT SOLD TO | TOTAL GRAMS | AVG GRAMS |
|---------------|-----------|------------------------------|-------------|-----------|
| BUPRENORPHINE | 9064      | 36                           | 1,213.55    | 33.71     |
| METHADONE     | 9250B     | 93                           | 396,298.80  | 4,261.28  |

**STATE: UT - UTAH****BUSINESS ACTIVITY: A - PHARMACIES**

| DRUG NAME                        | DRUG CODE | NUMBER OF REGISTRANT SOLD TO | TOTAL GRAMS | AVG GRAMS |
|----------------------------------|-----------|------------------------------|-------------|-----------|
| AMPHETAMINE                      | 1100      | 544                          | 354,420.63  | 651.51    |
| METHAMPHETAMINE                  | 1105      | 30                           | 94.43       | 3.15      |
| LISDEXAMFETAMINE                 | 1205      | 521                          | 89,374.26   | 171.54    |
| METHYLPHENIDATE (DL;D;L;ISOMERS) | 1724      | 543                          | 179,388.78  | 330.37    |
| CODEINE                          | 9050      | 526                          | 56,900.99   | 108.18    |
| BUPRENORPHINE                    | 9064      | 533                          | 40,424.24   | 75.84     |
| OXYCODONE                        | 9143      | 547                          | 563,666.03  | 1,030.47  |
| HYDROMORPHONE                    | 9150      | 508                          | 8,102.85    | 15.95     |
| HYDROCODONE                      | 9193      | 548                          | 192,510.03  | 351.30    |
| MEPERIDINE (PETHIDINE)           | 9230      | 231                          | 4,816.13    | 20.85     |
| METHADONE                        | 9250B     | 492                          | 31,285.66   | 63.59     |
| MORPHINE                         | 9300      | 533                          | 157,907.27  | 296.26    |
| OXYMORPHONE                      | 9652      | 367                          | 10,630.77   | 28.97     |
| TAPENTADOL                       | 9780      | 375                          | 39,586.50   | 105.56    |
| FENTANYL BASE                    | 9801      | 523                          | 2,475.05    | 4.73      |

**BUSINESS ACTIVITY: B - HOSPITALS**

| DRUG NAME                        | DRUG CODE | NUMBER OF REGISTRANT SOLD TO | TOTAL GRAMS | AVG GRAMS |
|----------------------------------|-----------|------------------------------|-------------|-----------|
| AMPHETAMINE                      | 1100      | 31                           | 4,262.30    | 137.49    |
| LISDEXAMFETAMINE                 | 1205      | 15                           | 862.53      | 57.50     |
| METHYLPHENIDATE (DL;D;L;ISOMERS) | 1724      | 44                           | 4,310.92    | 97.98     |
| CODEINE                          | 9050      | 36                           | 1,430.03    | 39.72     |
| BUPRENORPHINE                    | 9064      | 44                           | 841.21      | 19.12     |
| OXYCODONE                        | 9143      | 90                           | 23,027.35   | 255.86    |
| HYDROMORPHONE                    | 9150      | 82                           | 1,492.85    | 18.21     |
| HYDROCODONE                      | 9193      | 116                          | 9,901.99    | 85.36     |
| MEPERIDINE (PETHIDINE)           | 9230      | 73                           | 1,340.43    | 18.36     |
| METHADONE                        | 9250B     | 55                           | 1,171.93    | 21.31     |
| MORPHINE                         | 9300      | 102                          | 12,682.43   | 124.34    |



|               |      |     |          |        |
|---------------|------|-----|----------|--------|
| OXYMORPHONE   | 9652 | 9   | 49.42    | 5.49   |
| TAPENTADOL    | 9780 | 19  | 2,641.50 | 139.03 |
| FENTANYL BASE | 9801 | 104 | 201.37   | 1.94   |

**BUSINESS ACTIVITY: C - PRACTITIONERS**

| DRUG NAME                        | DRUG CODE | NUMBER OF REGISTRANT SOLD TO | TOTAL GRAMS | AVG GRAMS |
|----------------------------------|-----------|------------------------------|-------------|-----------|
| AMPHETAMINE                      | 1100      | 2                            | 6.10        | 3.05      |
| LISDEXAMFETAMINE                 | 1205      | 1                            | 40.34       | 40.34     |
| METHYLPHENIDATE (DL;D;L;ISOMERS) | 1724      | 1                            | 4.15        | 4.15      |
| CODEINE                          | 9050      | 11                           | 506.79      | 46.07     |
| BUPRENORPHINE                    | 9064      | 190                          | 18.48       | 0.10      |
| OXYCODONE                        | 9143      | 9                            | 11.43       | 1.27      |
| HYDROMORPHONE                    | 9150      | 82                           | 73.45       | 0.90      |
| HYDROCODONE                      | 9193      | 78                           | 336.80      | 4.32      |
| MEPERIDINE (PETHIDINE)           | 9230      | 15                           | 124.19      | 8.28      |
| METHADONE                        | 9250B     | 6                            | 14.31       | 2.39      |
| MORPHINE                         | 9300      | 98                           | 112.21      | 1.15      |
| FENTANYL BASE                    | 9801      | 190                          | 12.00       | 0.06      |

**BUSINESS ACTIVITY: D - TEACHING INSTITUTIONS**

| DRUG NAME     | DRUG CODE | NUMBER OF REGISTRANT SOLD TO | TOTAL GRAMS | AVG GRAMS |
|---------------|-----------|------------------------------|-------------|-----------|
| BUPRENORPHINE | 9064      | 1                            | 0.01        | 0.01      |

**BUSINESS ACTIVITY: M - MID-LEVEL PRACTITIONERS**

| DRUG NAME              | DRUG CODE | NUMBER OF REGISTRANT SOLD TO | TOTAL GRAMS | AVG GRAMS |
|------------------------|-----------|------------------------------|-------------|-----------|
| BUPRENORPHINE          | 9064      | 1                            | 0.42        | 0.42      |
| HYDROMORPHONE          | 9150      | 1                            | 0.04        | 0.04      |
| MEPERIDINE (PETHIDINE) | 9230      | 3                            | 52.29       | 17.43     |
| MORPHINE               | 9300      | 3                            | 8.72        | 2.91      |
| FENTANYL BASE          | 9801      | 6                            | 0.57        | 0.10      |

**BUSINESS ACTIVITY: NTP - NARCOTIC TREATMENT PROGRAMS**

| DRUG NAME     | DRUG CODE | NUMBER OF REGISTRANT SOLD TO | TOTAL GRAMS | AVG GRAMS |
|---------------|-----------|------------------------------|-------------|-----------|
| BUPRENORPHINE | 9064      | 12                           | 290.78      | 24.23     |
| METHADONE     | 9250B     | 16                           | 65,051.50   | 4,065.72  |

**STATE: VA - VIRGINIA****BUSINESS ACTIVITY: A - PHARMACIES**

| DRUG NAME                        | DRUG CODE | NUMBER OF REGISTRANT SOLD TO | TOTAL GRAMS | AVG GRAMS |
|----------------------------------|-----------|------------------------------|-------------|-----------|
| AMPHETAMINE                      | 1100      | 1,596                        | 703,182.32  | 440.59    |
| METHAMPHETAMINE                  | 1105      | 42                           | 126.17      | 3.00      |
| LISDEXAMFETAMINE                 | 1205      | 1,542                        | 260,281.43  | 168.79    |
| METHYLPHENIDATE (DL;D;L;ISOMERS) | 1724      | 1,583                        | 485,850.87  | 306.92    |
| CODEINE                          | 9050      | 1,562                        | 173,802.06  | 111.27    |
| BUPRENORPHINE                    | 9064      | 1,491                        | 80,679.63   | 54.11     |

|                        |       |       |            |        |
|------------------------|-------|-------|------------|--------|
| OXYCODONE              | 9143  | 1,598 | 945,287.75 | 591.54 |
| HYDROMORPHONE          | 9150  | 1,505 | 29,288.35  | 19.46  |
| HYDROCODONE            | 9193  | 1,607 | 323,450.80 | 201.28 |
| MEPERIDINE (PETHIDINE) | 9230  | 639   | 14,739.24  | 23.07  |
| METHADONE              | 9250B | 1,242 | 49,869.51  | 40.15  |
| MORPHINE               | 9300  | 1,523 | 244,402.01 | 160.47 |
| OXYMORPHONE            | 9652  | 844   | 22,047.58  | 26.12  |
| TAPENTADOL             | 9780  | 1,050 | 123,618.00 | 117.73 |
| FENTANYL BASE          | 9801  | 1,462 | 4,583.83   | 3.14   |

**BUSINESS ACTIVITY: B - HOSPITALS**

| DRUG NAME                        | DRUG CODE | NUMBER OF REGISTRANT SOLD TO | TOTAL GRAMS | AVG GRAMS |
|----------------------------------|-----------|------------------------------|-------------|-----------|
| AMPHETAMINE                      | 1100      | 91                           | 30,622.67   | 336.51    |
| LISDEXAMFETAMINE                 | 1205      | 45                           | 7,923.44    | 176.08    |
| METHYLPHENIDATE (DL;D;L;ISOMERS) | 1724      | 122                          | 34,665.63   | 284.14    |
| CODEINE                          | 9050      | 126                          | 6,052.29    | 48.03     |
| BUPRENORPHINE                    | 9064      | 115                          | 2,811.63    | 24.45     |
| OXYCODONE                        | 9143      | 176                          | 59,683.18   | 339.11    |
| HYDROMORPHONE                    | 9150      | 174                          | 6,267.76    | 36.02     |
| HYDROCODONE                      | 9193      | 175                          | 16,067.06   | 91.81     |
| MEPERIDINE (PETHIDINE)           | 9230      | 125                          | 3,421.40    | 27.37     |
| METHADONE                        | 9250B     | 123                          | 3,401.70    | 27.66     |
| MORPHINE                         | 9300      | 183                          | 25,743.03   | 140.67    |
| OXYMORPHONE                      | 9652      | 14                           | 45.94       | 3.28      |
| TAPENTADOL                       | 9780      | 29                           | 2,310.00    | 79.66     |
| FENTANYL BASE                    | 9801      | 187                          | 684.97      | 3.66      |

**BUSINESS ACTIVITY: C - PRACTITIONERS**

| DRUG NAME                        | DRUG CODE | NUMBER OF REGISTRANT SOLD TO | TOTAL GRAMS | AVG GRAMS |
|----------------------------------|-----------|------------------------------|-------------|-----------|
| AMPHETAMINE                      | 1100      | 3                            | 95.97       | 31.99     |
| LISDEXAMFETAMINE                 | 1205      | 1                            | 37.66       | 37.66     |
| METHYLPHENIDATE (DL;D;L;ISOMERS) | 1724      | 2                            | 39.26       | 19.63     |
| CODEINE                          | 9050      | 146                          | 4,206.21    | 28.81     |
| BUPRENORPHINE                    | 9064      | 883                          | 77.30       | 0.09      |
| OXYCODONE                        | 9143      | 28                           | 221.53      | 7.91      |
| HYDROMORPHONE                    | 9150      | 345                          | 205.21      | 0.59      |
| HYDROCODONE                      | 9193      | 221                          | 1,016.43    | 4.60      |
| MEPERIDINE (PETHIDINE)           | 9230      | 112                          | 638.16      | 5.70      |
| METHADONE                        | 9250B     | 27                           | 58.63       | 2.17      |
| MORPHINE                         | 9300      | 211                          | 254.95      | 1.21      |
| OXYMORPHONE                      | 9652      | 1                            | 15.52       | 15.52     |
| TAPENTADOL                       | 9780      | 2                            | 189.00      | 94.50     |

|               |      |     |       |      |
|---------------|------|-----|-------|------|
| FENTANYL BASE | 9801 | 465 | 38.70 | 0.08 |
|---------------|------|-----|-------|------|

**BUSINESS ACTIVITY: D - TEACHING INSTITUTIONS**

| DRUG NAME     | DRUG CODE | NUMBER OF REGISTRANT SOLD TO | TOTAL GRAMS | AVG GRAMS |
|---------------|-----------|------------------------------|-------------|-----------|
| CODEINE       | 9050      | 1                            | 477.76      | 477.76    |
| BUPRENORPHINE | 9064      | 1                            | 0.57        | 0.57      |
| HYDROMORPHONE | 9150      | 1                            | 1.38        | 1.38      |
| HYDROCODONE   | 9193      | 1                            | 2.10        | 2.10      |
| METHADONE     | 9250B     | 1                            | 2.15        | 2.15      |
| MORPHINE      | 9300      | 1                            | 31.17       | 31.17     |
| FENTANYL BASE | 9801      | 1                            | 1.16        | 1.16      |

**BUSINESS ACTIVITY: M - MID-LEVEL PRACTITIONERS**

| DRUG NAME     | DRUG CODE | NUMBER OF REGISTRANT SOLD TO | TOTAL GRAMS | AVG GRAMS |
|---------------|-----------|------------------------------|-------------|-----------|
| CODEINE       | 9050      | 21                           | 23.49       | 1.12      |
| BUPRENORPHINE | 9064      | 1                            | 0.02        | 0.02      |
| MORPHINE      | 9300      | 8                            | 2.96        | 0.37      |
| FENTANYL BASE | 9801      | 14                           | 0.19        | 0.01      |

**BUSINESS ACTIVITY: NTP - NARCOTIC TREATMENT PROGRAMS**

| DRUG NAME     | DRUG CODE | NUMBER OF REGISTRANT SOLD TO | TOTAL GRAMS | AVG GRAMS |
|---------------|-----------|------------------------------|-------------|-----------|
| BUPRENORPHINE | 9064      | 28                           | 3,017.29    | 107.76    |
| METHADONE     | 9250B     | 44                           | 264,991.94  | 6,022.54  |

**STATE: VI - VIRGIN ISLANDS****BUSINESS ACTIVITY: A - PHARMACIES**

| DRUG NAME                        | DRUG CODE | NUMBER OF REGISTRANT SOLD TO | TOTAL GRAMS | AVG GRAMS |
|----------------------------------|-----------|------------------------------|-------------|-----------|
| AMPHETAMINE                      | 1100      | 19                           | 1,325.10    | 69.74     |
| LISDEXAMFETAMINE                 | 1205      | 14                           | 277.49      | 19.82     |
| METHYLPHENIDATE (DL;D;L;ISOMERS) | 1724      | 16                           | 585.73      | 36.61     |
| CODEINE                          | 9050      | 20                           | 2,705.46    | 135.27    |
| BUPRENORPHINE                    | 9064      | 11                           | 48.92       | 4.45      |
| OXYCODONE                        | 9143      | 20                           | 1,735.18    | 86.76     |
| HYDROMORPHONE                    | 9150      | 13                           | 46.50       | 3.58      |
| HYDROCODONE                      | 9193      | 20                           | 946.58      | 47.33     |
| MEPERIDINE (PETHIDINE)           | 9230      | 9                            | 209.16      | 23.24     |
| METHADONE                        | 9250B     | 3                            | 27.73       | 9.24      |
| MORPHINE                         | 9300      | 12                           | 461.06      | 38.42     |
| TAPENTADOL                       | 9780      | 1                            | 5.00        | 5.00      |
| FENTANYL BASE                    | 9801      | 13                           | 15.49       | 1.19      |

**BUSINESS ACTIVITY: B - HOSPITALS**

| DRUG NAME                        | DRUG CODE | NUMBER OF REGISTRANT SOLD TO | TOTAL GRAMS | AVG GRAMS |
|----------------------------------|-----------|------------------------------|-------------|-----------|
| METHYLPHENIDATE (DL;D;L;ISOMERS) | 1724      | 1                            | 0.43        | 0.43      |
| CODEINE                          | 9050      | 2                            | 72.93       | 36.47     |

|                        |      |   |        |        |
|------------------------|------|---|--------|--------|
| OXYCODONE              | 9143 | 2 | 17.39  | 8.70   |
| HYDROMORPHONE          | 9150 | 2 | 7.80   | 3.90   |
| HYDROCODONE            | 9193 | 2 | 22.24  | 11.12  |
| MEPERIDINE (PETHIDINE) | 9230 | 2 | 251.10 | 125.55 |
| MORPHINE               | 9300 | 2 | 10.68  | 5.34   |
| FENTANYL BASE          | 9801 | 3 | 2.38   | 0.79   |

**BUSINESS ACTIVITY: C - PRACTITIONERS**

| DRUG NAME     | DRUG CODE | NUMBER OF REGISTRANT SOLD TO | TOTAL GRAMS | AVG GRAMS |
|---------------|-----------|------------------------------|-------------|-----------|
| BUPRENORPHINE | 9064      | 5                            | 0.21        | 0.04      |
| MORPHINE      | 9300      | 1                            | 0.02        | 0.02      |
| FENTANYL BASE | 9801      | 2                            | 0.07        | 0.03      |

**BUSINESS ACTIVITY: NTP - NARCOTIC TREATMENT PROGRAMS**

| DRUG NAME | DRUG CODE | NUMBER OF REGISTRANT SOLD TO | TOTAL GRAMS | AVG GRAMS |
|-----------|-----------|------------------------------|-------------|-----------|
| METHADONE | 9250B     | 1                            | 536.64      | 536.64    |

**STATE: VT - VERMONT****BUSINESS ACTIVITY: A - PHARMACIES**

| DRUG NAME                        | DRUG CODE | NUMBER OF REGISTRANT SOLD TO | TOTAL GRAMS | AVG GRAMS |
|----------------------------------|-----------|------------------------------|-------------|-----------|
| AMPHETAMINE                      | 1100      | 172                          | 39,381.80   | 228.96    |
| METHAMPHETAMINE                  | 1105      | 4                            | 8.44        | 2.11      |
| LISDEXAMFETAMINE                 | 1205      | 172                          | 28,343.09   | 164.79    |
| METHYLPHENIDATE (DL;D;L;ISOMERS) | 1724      | 172                          | 72,744.85   | 422.94    |
| CODEINE                          | 9050      | 155                          | 10,522.47   | 67.89     |
| BUPRENORPHINE                    | 9064      | 171                          | 22,196.91   | 129.81    |
| OXYCODONE                        | 9143      | 172                          | 73,951.45   | 429.95    |
| HYDROMORPHONE                    | 9150      | 169                          | 3,404.85    | 20.15     |
| HYDROCODONE                      | 9193      | 173                          | 15,583.34   | 90.08     |
| MEPERIDINE (PETHIDINE)           | 9230      | 22                           | 374.75      | 17.03     |
| METHADONE                        | 9250B     | 163                          | 11,809.21   | 72.45     |
| MORPHINE                         | 9300      | 170                          | 32,839.68   | 193.17    |
| OXYMORPHONE                      | 9652      | 25                           | 548.64      | 21.95     |
| TAPENTADOL                       | 9780      | 44                           | 3,808.50    | 86.56     |
| FENTANYL BASE                    | 9801      | 161                          | 547.79      | 3.40      |

**BUSINESS ACTIVITY: B - HOSPITALS**

| DRUG NAME                        | DRUG CODE | NUMBER OF REGISTRANT SOLD TO | TOTAL GRAMS | AVG GRAMS |
|----------------------------------|-----------|------------------------------|-------------|-----------|
| AMPHETAMINE                      | 1100      | 12                           | 1,155.90    | 96.32     |
| LISDEXAMFETAMINE                 | 1205      | 6                            | 359.58      | 59.93     |
| METHYLPHENIDATE (DL;D;L;ISOMERS) | 1724      | 16                           | 2,180.55    | 136.28    |
| CODEINE                          | 9050      | 13                           | 351.23      | 27.02     |
| BUPRENORPHINE                    | 9064      | 17                           | 1,182.14    | 69.54     |
| OXYCODONE                        | 9143      | 18                           | 5,066.81    | 281.49    |

|                        |       |    |          |        |
|------------------------|-------|----|----------|--------|
| HYDROMORPHONE          | 9150  | 16 | 564.03   | 35.25  |
| HYDROCODONE            | 9193  | 17 | 808.55   | 47.56  |
| MEPERIDINE (PETHIDINE) | 9230  | 12 | 681.62   | 56.80  |
| METHADONE              | 9250B | 16 | 643.70   | 40.23  |
| MORPHINE               | 9300  | 17 | 3,875.88 | 227.99 |
| OXYMORPHONE            | 9652  | 1  | 8.56     | 8.56   |
| TAPENTADOL             | 9780  | 1  | 80.00    | 80.00  |
| FENTANYL BASE          | 9801  | 17 | 47.28    | 2.78   |

**BUSINESS ACTIVITY: C - PRACTITIONERS**

| DRUG NAME     | DRUG CODE | NUMBER OF REGISTRANT SOLD TO | TOTAL GRAMS | AVG GRAMS |
|---------------|-----------|------------------------------|-------------|-----------|
| CODEINE       | 9050      | 1                            | 4.42        | 4.42      |
| BUPRENORPHINE | 9064      | 98                           | 6.59        | 0.07      |
| HYDROMORPHONE | 9150      | 52                           | 29.59       | 0.57      |
| HYDROCODONE   | 9193      | 14                           | 21.65       | 1.55      |
| METHADONE     | 9250B     | 1                            | 0.18        | 0.18      |
| MORPHINE      | 9300      | 23                           | 20.56       | 0.89      |
| FENTANYL BASE | 9801      | 37                           | 2.50        | 0.07      |

**BUSINESS ACTIVITY: D - TEACHING INSTITUTIONS**

| DRUG NAME     | DRUG CODE | NUMBER OF REGISTRANT SOLD TO | TOTAL GRAMS | AVG GRAMS |
|---------------|-----------|------------------------------|-------------|-----------|
| BUPRENORPHINE | 9064      | 1                            | 0.00        | 0.00      |

**BUSINESS ACTIVITY: M - MID-LEVEL PRACTITIONERS**

| DRUG NAME | DRUG CODE | NUMBER OF REGISTRANT SOLD TO | TOTAL GRAMS | AVG GRAMS |
|-----------|-----------|------------------------------|-------------|-----------|
| CODEINE   | 9050      | 3                            | 8.84        | 2.95      |

**BUSINESS ACTIVITY: NTP - NARCOTIC TREATMENT PROGRAMS**

| DRUG NAME     | DRUG CODE | NUMBER OF REGISTRANT SOLD TO | TOTAL GRAMS | AVG GRAMS |
|---------------|-----------|------------------------------|-------------|-----------|
| BUPRENORPHINE | 9064      | 10                           | 3,778.98    | 377.90    |
| METHADONE     | 9250B     | 10                           | 59,448.98   | 5,944.90  |

**STATE: WA - WASHINGTON****BUSINESS ACTIVITY: A - PHARMACIES**

| DRUG NAME                        | DRUG CODE | NUMBER OF REGISTRANT SOLD TO | TOTAL GRAMS | AVG GRAMS |
|----------------------------------|-----------|------------------------------|-------------|-----------|
| AMPHETAMINE                      | 1100      | 1,204                        | 447,715.75  | 371.86    |
| METHAMPHETAMINE                  | 1105      | 96                           | 353.19      | 3.68      |
| LISDEXAMFETAMINE                 | 1205      | 1,133                        | 139,132.48  | 122.80    |
| METHYLPHENIDATE (DL;D;L;ISOMERS) | 1724      | 1,204                        | 424,904.58  | 352.91    |
| CODEINE                          | 9050      | 1,219                        | 200,782.80  | 164.71    |
| BUPRENORPHINE                    | 9064      | 1,200                        | 90,235.71   | 75.20     |
| OXYCODONE                        | 9143      | 1,226                        | 921,189.05  | 751.38    |
| HYDROMORPHONE                    | 9150      | 1,166                        | 29,106.65   | 24.96     |
| HYDROCODONE                      | 9193      | 1,240                        | 420,969.87  | 339.49    |
| MEPERIDINE (PETHIDINE)           | 9230      | 396                          | 8,187.62    | 20.68     |

|               |       |       |            |        |
|---------------|-------|-------|------------|--------|
| METHADONE     | 9250B | 1,143 | 81,137.46  | 70.99  |
| MORPHINE      | 9300  | 1,213 | 330,565.58 | 272.52 |
| OXYMORPHONE   | 9652  | 434   | 5,678.04   | 13.08  |
| TAPENTADOL    | 9780  | 639   | 55,160.50  | 86.32  |
| FENTANYL BASE | 9801  | 1,113 | 4,194.22   | 3.77   |

**BUSINESS ACTIVITY: B - HOSPITALS**

| DRUG NAME                        | DRUG CODE | NUMBER OF REGISTRANT SOLD TO | TOTAL GRAMS | AVG GRAMS |
|----------------------------------|-----------|------------------------------|-------------|-----------|
| AMPHETAMINE                      | 1100      | 95                           | 14,825.57   | 156.06    |
| METHAMPHETAMINE                  | 1105      | 1                            | 0.40        | 0.40      |
| LISDEXAMFETAMINE                 | 1205      | 37                           | 3,441.75    | 93.02     |
| METHYLPHENIDATE (DL;D;L;ISOMERS) | 1724      | 111                          | 22,717.59   | 204.66    |
| CODEINE                          | 9050      | 156                          | 7,135.27    | 45.74     |
| BUPRENORPHINE                    | 9064      | 122                          | 3,506.49    | 28.74     |
| OXYCODONE                        | 9143      | 225                          | 68,489.55   | 304.40    |
| HYDROMORPHONE                    | 9150      | 192                          | 5,925.98    | 30.86     |
| HYDROCODONE                      | 9193      | 213                          | 26,871.11   | 126.16    |
| MEPERIDINE (PETHIDINE)           | 9230      | 158                          | 2,293.35    | 14.51     |
| METHADONE                        | 9250B     | 124                          | 8,267.12    | 66.67     |
| MORPHINE                         | 9300      | 224                          | 34,485.77   | 153.95    |
| OXYMORPHONE                      | 9652      | 9                            | 46.66       | 5.18      |
| TAPENTADOL                       | 9780      | 23                           | 1,748.00    | 76.00     |
| FENTANYL BASE                    | 9801      | 230                          | 622.23      | 2.71      |

**BUSINESS ACTIVITY: C - PRACTITIONERS**

| DRUG NAME                        | DRUG CODE | NUMBER OF REGISTRANT SOLD TO | TOTAL GRAMS | AVG GRAMS |
|----------------------------------|-----------|------------------------------|-------------|-----------|
| AMPHETAMINE                      | 1100      | 2                            | 2.89        | 1.44      |
| LISDEXAMFETAMINE                 | 1205      | 1                            | 24.97       | 24.97     |
| METHYLPHENIDATE (DL;D;L;ISOMERS) | 1724      | 1                            | 5.45        | 5.45      |
| CODEINE                          | 9050      | 96                           | 6,889.64    | 71.77     |
| BUPRENORPHINE                    | 9064      | 857                          | 197.65      | 0.23      |
| OXYCODONE                        | 9143      | 39                           | 55.96       | 1.43      |
| HYDROMORPHONE                    | 9150      | 446                          | 253.62      | 0.57      |
| HYDROCODONE                      | 9193      | 398                          | 1,126.46    | 2.83      |
| MEPERIDINE (PETHIDINE)           | 9230      | 92                           | 912.35      | 9.92      |
| METHADONE                        | 9250B     | 43                           | 147.93      | 3.44      |
| MORPHINE                         | 9300      | 340                          | 524.41      | 1.54      |
| FENTANYL BASE                    | 9801      | 644                          | 41.84       | 0.06      |

**BUSINESS ACTIVITY: D - TEACHING INSTITUTIONS**

| DRUG NAME     | DRUG CODE | NUMBER OF REGISTRANT SOLD TO | TOTAL GRAMS | AVG GRAMS |
|---------------|-----------|------------------------------|-------------|-----------|
| BUPRENORPHINE | 9064      | 1                            | 0.01        | 0.01      |
| HYDROMORPHONE | 9150      | 1                            | 0.04        | 0.04      |

**BUSINESS ACTIVITY: M - MID-LEVEL PRACTITIONERS**

| DRUG NAME              | DRUG CODE | NUMBER OF REGISTRANT SOLD TO | TOTAL GRAMS | AVG GRAMS |
|------------------------|-----------|------------------------------|-------------|-----------|
| CODEINE                | 9050      | 5                            | 17.13       | 3.43      |
| BUPRENORPHINE          | 9064      | 11                           | 90.77       | 8.25      |
| OXYCODONE              | 9143      | 3                            | 8.07        | 2.69      |
| HYDROMORPHONE          | 9150      | 2                            | 0.18        | 0.09      |
| HYDROCODONE            | 9193      | 1                            | 0.18        | 0.18      |
| MEPERIDINE (PETHIDINE) | 9230      | 4                            | 13.07       | 3.27      |
| MORPHINE               | 9300      | 3                            | 2.63        | 0.88      |
| FENTANYL BASE          | 9801      | 11                           | 0.43        | 0.04      |

**BUSINESS ACTIVITY: NTP - NARCOTIC TREATMENT PROGRAMS**

| DRUG NAME     | DRUG CODE | NUMBER OF REGISTRANT SOLD TO | TOTAL GRAMS | AVG GRAMS |
|---------------|-----------|------------------------------|-------------|-----------|
| BUPRENORPHINE | 9064      | 15                           | 1,893.82    | 126.25    |
| METHADONE     | 9250B     | 26                           | 281,936.35  | 10,843.71 |

**STATE: WI - WISCONSIN****BUSINESS ACTIVITY: A - PHARMACIES**

| DRUG NAME                        | DRUG CODE | NUMBER OF REGISTRANT SOLD TO | TOTAL GRAMS | AVG GRAMS |
|----------------------------------|-----------|------------------------------|-------------|-----------|
| AMPHETAMINE                      | 1100      | 1,095                        | 492,962.17  | 450.19    |
| METHAMPHETAMINE                  | 1105      | 36                           | 136.21      | 3.78      |
| LISDEXAMFETAMINE                 | 1205      | 1,087                        | 289,089.89  | 265.95    |
| METHYLPHENIDATE (DL;D;L;ISOMERS) | 1724      | 1,094                        | 400,189.86  | 365.80    |
| CODEINE                          | 9050      | 1,091                        | 163,076.46  | 149.47    |
| BUPRENORPHINE                    | 9064      | 1,032                        | 43,120.24   | 41.78     |
| OXYCODONE                        | 9143      | 1,103                        | 617,883.03  | 560.18    |
| HYDROMORPHONE                    | 9150      | 915                          | 8,248.67    | 9.01      |
| HYDROCODONE                      | 9193      | 1,109                        | 255,190.32  | 230.11    |
| MEPERIDINE (PETHIDINE)           | 9230      | 94                           | 1,313.50    | 13.97     |
| METHADONE                        | 9250B     | 846                          | 24,799.57   | 29.31     |
| MORPHINE                         | 9300      | 1,089                        | 230,297.62  | 211.48    |
| OXYMORPHONE                      | 9652      | 321                          | 3,327.89    | 10.37     |
| TAPENTADOL                       | 9780      | 575                          | 43,930.00   | 76.40     |
| FENTANYL BASE                    | 9801      | 1,052                        | 3,972.17    | 3.78      |

**BUSINESS ACTIVITY: B - HOSPITALS**

| DRUG NAME                        | DRUG CODE | NUMBER OF REGISTRANT SOLD TO | TOTAL GRAMS | AVG GRAMS |
|----------------------------------|-----------|------------------------------|-------------|-----------|
| AMPHETAMINE                      | 1100      | 104                          | 11,684.21   | 112.35    |
| METHAMPHETAMINE                  | 1105      | 1                            | 2.01        | 2.01      |
| LISDEXAMFETAMINE                 | 1205      | 67                           | 2,619.95    | 39.10     |
| METHYLPHENIDATE (DL;D;L;ISOMERS) | 1724      | 128                          | 8,812.31    | 68.85     |
| CODEINE                          | 9050      | 156                          | 4,582.04    | 29.37     |
| BUPRENORPHINE                    | 9064      | 102                          | 2,759.77    | 27.06     |

|                        |       |     |           |        |
|------------------------|-------|-----|-----------|--------|
| OXYCODONE              | 9143  | 173 | 40,326.45 | 233.10 |
| HYDROMORPHONE          | 9150  | 161 | 3,765.96  | 23.39  |
| HYDROCODONE            | 9193  | 170 | 13,398.95 | 78.82  |
| MEPERIDINE (PETHIDINE) | 9230  | 109 | 2,268.41  | 20.81  |
| METHADONE              | 9250B | 121 | 2,319.84  | 19.17  |
| MORPHINE               | 9300  | 167 | 25,926.13 | 155.25 |
| OXYMORPHONE            | 9652  | 6   | 7.58      | 1.26   |
| TAPENTADOL             | 9780  | 25  | 435.65    | 17.43  |
| FENTANYL BASE          | 9801  | 164 | 540.33    | 3.29   |

**BUSINESS ACTIVITY: C - PRACTITIONERS**

| DRUG NAME                        | DRUG CODE | NUMBER OF REGISTRANT SOLD TO | TOTAL GRAMS | AVG GRAMS |
|----------------------------------|-----------|------------------------------|-------------|-----------|
| METHYLPHENIDATE (DL;D;L;ISOMERS) | 1724      | 2                            | 7.35        | 3.67      |
| CODEINE                          | 9050      | 55                           | 495.08      | 9.00      |
| BUPRENORPHINE                    | 9064      | 562                          | 201.15      | 0.36      |
| OXYCODONE                        | 9143      | 58                           | 502.13      | 8.66      |
| HYDROMORPHONE                    | 9150      | 322                          | 236.58      | 0.73      |
| HYDROCODONE                      | 9193      | 236                          | 618.79      | 2.62      |
| MEPERIDINE (PETHIDINE)           | 9230      | 60                           | 451.98      | 7.53      |
| METHADONE                        | 9250B     | 20                           | 46.69       | 2.33      |
| MORPHINE                         | 9300      | 220                          | 330.86      | 1.50      |
| OXYMORPHONE                      | 9652      | 1                            | 4.82        | 4.82      |
| FENTANYL BASE                    | 9801      | 334                          | 45.22       | 0.14      |

**BUSINESS ACTIVITY: M - MID-LEVEL PRACTITIONERS**

| DRUG NAME     | DRUG CODE | NUMBER OF REGISTRANT SOLD TO | TOTAL GRAMS | AVG GRAMS |
|---------------|-----------|------------------------------|-------------|-----------|
| CODEINE       | 9050      | 2                            | 8.10        | 4.05      |
| OXYCODONE     | 9143      | 1                            | 0.45        | 0.45      |
| HYDROMORPHONE | 9150      | 1                            | 0.04        | 0.04      |
| MORPHINE      | 9300      | 1                            | 0.19        | 0.19      |
| FENTANYL BASE | 9801      | 1                            | 0.01        | 0.01      |

**BUSINESS ACTIVITY: NTP - NARCOTIC TREATMENT PROGRAMS**

| DRUG NAME     | DRUG CODE | NUMBER OF REGISTRANT SOLD TO | TOTAL GRAMS | AVG GRAMS |
|---------------|-----------|------------------------------|-------------|-----------|
| BUPRENORPHINE | 9064      | 12                           | 2,034.01    | 169.50    |
| METHADONE     | 9250B     | 20                           | 199,800.02  | 9,990.00  |

**STATE: WV - WEST VIRGINIA****BUSINESS ACTIVITY: A - PHARMACIES**

| DRUG NAME                        | DRUG CODE | NUMBER OF REGISTRANT SOLD TO | TOTAL GRAMS | AVG GRAMS |
|----------------------------------|-----------|------------------------------|-------------|-----------|
| AMPHETAMINE                      | 1100      | 647                          | 92,489.99   | 142.95    |
| METHAMPHETAMINE                  | 1105      | 3                            | 18.48       | 6.16      |
| LISDEXAMFETAMINE                 | 1205      | 636                          | 74,392.22   | 116.97    |
| METHYLPHENIDATE (DL;D;L;ISOMERS) | 1724      | 653                          | 118,494.31  | 181.46    |



|                        |       |     |            |        |
|------------------------|-------|-----|------------|--------|
| CODEINE                | 9050  | 632 | 140,835.68 | 222.84 |
| BUPRENORPHINE          | 9064  | 581 | 60,503.12  | 104.14 |
| OXYCODONE              | 9143  | 660 | 249,779.20 | 378.45 |
| HYDROMORPHONE          | 9150  | 424 | 3,471.25   | 8.19   |
| HYDROCODONE            | 9193  | 659 | 170,304.66 | 258.43 |
| MEPERIDINE (PETHIDINE) | 9230  | 68  | 976.52     | 14.36  |
| METHADONE              | 9250B | 375 | 10,577.98  | 28.21  |
| MORPHINE               | 9300  | 622 | 61,625.64  | 99.08  |
| OXYMORPHONE            | 9652  | 200 | 5,138.76   | 25.69  |
| TAPENTADOL             | 9780  | 208 | 16,212.00  | 77.94  |
| FENTANYL BASE          | 9801  | 586 | 1,485.68   | 2.54   |

**BUSINESS ACTIVITY: B - HOSPITALS**

| DRUG NAME                        | DRUG CODE | NUMBER OF REGISTRANT SOLD TO | TOTAL GRAMS | AVG GRAMS |
|----------------------------------|-----------|------------------------------|-------------|-----------|
| AMPHETAMINE                      | 1100      | 34                           | 1,938.64    | 57.02     |
| LISDEXAMFETAMINE                 | 1205      | 21                           | 759.05      | 36.15     |
| METHYLPHENIDATE (DL;D;L;ISOMERS) | 1724      | 51                           | 2,248.38    | 44.09     |
| CODEINE                          | 9050      | 71                           | 2,354.74    | 33.17     |
| BUPRENORPHINE                    | 9064      | 51                           | 3,189.82    | 62.55     |
| OXYCODONE                        | 9143      | 76                           | 14,554.81   | 191.51    |
| HYDROMORPHONE                    | 9150      | 69                           | 940.33      | 13.63     |
| HYDROCODONE                      | 9193      | 78                           | 14,685.73   | 188.28    |
| MEPERIDINE (PETHIDINE)           | 9230      | 48                           | 803.96      | 16.75     |
| METHADONE                        | 9250B     | 47                           | 788.50      | 16.78     |
| MORPHINE                         | 9300      | 74                           | 9,593.38    | 129.64    |
| OXYMORPHONE                      | 9652      | 6                            | 23.06       | 3.84      |
| TAPENTADOL                       | 9780      | 9                            | 161.50      | 17.94     |
| FENTANYL BASE                    | 9801      | 73                           | 220.92      | 3.03      |

**BUSINESS ACTIVITY: C - PRACTITIONERS**

| DRUG NAME              | DRUG CODE | NUMBER OF REGISTRANT SOLD TO | TOTAL GRAMS | AVG GRAMS |
|------------------------|-----------|------------------------------|-------------|-----------|
| CODEINE                | 9050      | 18                           | 111.38      | 6.19      |
| BUPRENORPHINE          | 9064      | 111                          | 8.91        | 0.08      |
| OXYCODONE              | 9143      | 1                            | 0.45        | 0.45      |
| HYDROMORPHONE          | 9150      | 25                           | 12.27       | 0.49      |
| HYDROCODONE            | 9193      | 43                           | 149.24      | 3.47      |
| MEPERIDINE (PETHIDINE) | 9230      | 7                            | 202.08      | 28.87     |
| MORPHINE               | 9300      | 30                           | 22.55       | 0.75      |
| FENTANYL BASE          | 9801      | 49                           | 3.54        | 0.07      |

**BUSINESS ACTIVITY: D - TEACHING INSTITUTIONS**

| DRUG NAME     | DRUG CODE | NUMBER OF REGISTRANT SOLD TO | TOTAL GRAMS | AVG GRAMS |
|---------------|-----------|------------------------------|-------------|-----------|
| BUPRENORPHINE | 9064      | 1                            | 0.00        | 0.00      |

**BUSINESS ACTIVITY: M - MID-LEVEL PRACTITIONERS**

| DRUG NAME     | DRUG CODE | NUMBER OF REGISTRANT SOLD TO | TOTAL GRAMS | AVG GRAMS |
|---------------|-----------|------------------------------|-------------|-----------|
| CODEINE       | 9050      | 4                            | 3.47        | 0.87      |
| MORPHINE      | 9300      | 35                           | 13.15       | 0.38      |
| FENTANYL BASE | 9801      | 50                           | 0.55        | 0.01      |

**BUSINESS ACTIVITY: NTP - NARCOTIC TREATMENT PROGRAMS**

| DRUG NAME     | DRUG CODE | NUMBER OF REGISTRANT SOLD TO | TOTAL GRAMS | AVG GRAMS |
|---------------|-----------|------------------------------|-------------|-----------|
| BUPRENORPHINE | 9064      | 7                            | 843.12      | 120.45    |
| METHADONE     | 9250B     | 9                            | 71,802.43   | 7,978.05  |

**STATE: WY - WYOMING****BUSINESS ACTIVITY: A - PHARMACIES**

| DRUG NAME                        | DRUG CODE | NUMBER OF REGISTRANT SOLD TO | TOTAL GRAMS | AVG GRAMS |
|----------------------------------|-----------|------------------------------|-------------|-----------|
| AMPHETAMINE                      | 1100      | 116                          | 25,878.61   | 223.09    |
| METHAMPHETAMINE                  | 1105      | 5                            | 18.48       | 3.70      |
| LISDEXAMFETAMINE                 | 1205      | 114                          | 10,095.94   | 88.56     |
| METHYLPHENIDATE (DL;D;L;ISOMERS) | 1724      | 116                          | 28,334.55   | 244.26    |
| CODEINE                          | 9050      | 117                          | 12,909.45   | 110.34    |
| BUPRENORPHINE                    | 9064      | 117                          | 5,026.19    | 42.96     |
| OXYCODONE                        | 9143      | 118                          | 84,962.70   | 720.02    |
| HYDROMORPHONE                    | 9150      | 114                          | 1,863.76    | 16.35     |
| HYDROCODONE                      | 9193      | 118                          | 34,325.53   | 290.89    |
| MEPERIDINE (PETHIDINE)           | 9230      | 45                           | 992.97      | 22.07     |
| METHADONE                        | 9250B     | 99                           | 3,374.84    | 34.09     |
| MORPHINE                         | 9300      | 118                          | 24,680.88   | 209.16    |
| OXYMORPHONE                      | 9652      | 41                           | 548.28      | 13.37     |
| TAPENTADOL                       | 9780      | 54                           | 6,245.00    | 115.65    |
| FENTANYL BASE                    | 9801      | 116                          | 434.29      | 3.74      |

**BUSINESS ACTIVITY: B - HOSPITALS**

| DRUG NAME                        | DRUG CODE | NUMBER OF REGISTRANT SOLD TO | TOTAL GRAMS | AVG GRAMS |
|----------------------------------|-----------|------------------------------|-------------|-----------|
| AMPHETAMINE                      | 1100      | 17                           | 1,744.11    | 102.59    |
| LISDEXAMFETAMINE                 | 1205      | 10                           | 422.59      | 42.26     |
| METHYLPHENIDATE (DL;D;L;ISOMERS) | 1724      | 20                           | 1,953.15    | 97.66     |
| CODEINE                          | 9050      | 29                           | 1,228.37    | 42.36     |
| BUPRENORPHINE                    | 9064      | 19                           | 326.85      | 17.20     |
| OXYCODONE                        | 9143      | 45                           | 5,928.23    | 131.74    |
| HYDROMORPHONE                    | 9150      | 42                           | 231.11      | 5.50      |
| HYDROCODONE                      | 9193      | 46                           | 4,402.13    | 95.70     |
| MEPERIDINE (PETHIDINE)           | 9230      | 32                           | 249.68      | 7.80      |
| METHADONE                        | 9250B     | 15                           | 382.62      | 25.51     |
| MORPHINE                         | 9300      | 47                           | 5,788.77    | 123.17    |

|               |      |    |        |       |
|---------------|------|----|--------|-------|
| TAPENTADOL    | 9780 | 5  | 151.50 | 30.30 |
| FENTANYL BASE | 9801 | 46 | 54.45  | 1.18  |

**BUSINESS ACTIVITY: C - PRACTITIONERS**

| DRUG NAME              | DRUG CODE | NUMBER OF REGISTRANT SOLD TO | TOTAL GRAMS | AVG GRAMS |
|------------------------|-----------|------------------------------|-------------|-----------|
| CODEINE                | 9050      | 8                            | 183.44      | 22.93     |
| BUPRENORPHINE          | 9064      | 62                           | 3.96        | 0.06      |
| OXYCODONE              | 9143      | 1                            | 14.52       | 14.52     |
| HYDROMORPHONE          | 9150      | 19                           | 9.86        | 0.52      |
| HYDROCODONE            | 9193      | 27                           | 138.51      | 5.13      |
| MEPERIDINE (PETHIDINE) | 9230      | 3                            | 10.89       | 3.63      |
| MORPHINE               | 9300      | 32                           | 17.58       | 0.55      |
| FENTANYL BASE          | 9801      | 38                           | 1.97        | 0.05      |

**BUSINESS ACTIVITY: M - MID-LEVEL PRACTITIONERS**

| DRUG NAME   | DRUG CODE | NUMBER OF REGISTRANT SOLD TO | TOTAL GRAMS | AVG GRAMS |
|-------------|-----------|------------------------------|-------------|-----------|
| CODEINE     | 9050      | 2                            | 9.00        | 4.50      |
| HYDROCODONE | 9193      | 1                            | 0.18        | 0.18      |

Apr 22, 2020

1:49:11 PM

**ENTIRE UNITED STATES**  
**BUSINESS ACTIVITY: A - PHARMACIES**

| DRUG NAME                        | DRUG CODE | NUMBER OF REGISTRANT SOLD TO | TOTAL GRAMS   | AVG GRAMS |
|----------------------------------|-----------|------------------------------|---------------|-----------|
| AMPHETAMINE                      | 1100      | 64,973                       | 21,340,409.48 | 328.45    |
| METHAMPHETAMINE                  | 1105      | 1,829                        | 6,551.75      | 3.58      |
| LISDEXAMFETAMINE                 | 1205      | 60,432                       | 9,572,196.56  | 158.40    |
| METHYLPHENIDATE (DL;D;L;ISOMERS) | 1724      | 64,241                       | 17,067,203.87 | 265.67    |
| CODEINE                          | 9050      | 66,002                       | 13,454,714.20 | 203.85    |
| BUPRENORPHINE                    | 9064      | 60,254                       | 3,588,355.59  | 59.55     |
| OXYCODONE                        | 9143      | 66,390                       | 39,354,889.48 | 592.78    |
| HYDROMORPHONE                    | 9150      | 55,738                       | 955,536.23    | 17.14     |
| HYDROCODONE                      | 9193      | 66,537                       | 21,691,001.12 | 326.00    |
| MEPERIDINE (PETHIDINE)           | 9230      | 16,922                       | 347,366.89    | 20.53     |
| METHADONE                        | 9250B     | 49,371                       | 2,161,326.37  | 43.78     |
| MORPHINE                         | 9300      | 61,972                       | 12,617,308.23 | 203.60    |
| OXYMORPHONE                      | 9652      | 23,393                       | 563,228.34    | 24.08     |
| TAPENTADOL                       | 9780      | 36,817                       | 4,281,878.00  | 116.30    |
| FENTANYL BASE                    | 9801      | 59,631                       | 219,711.21    | 3.68      |

**BUSINESS ACTIVITY: B - HOSPITALS**

| DRUG NAME                        | DRUG CODE | NUMBER OF REGISTRANT SOLD TO | TOTAL GRAMS  | AVG GRAMS |
|----------------------------------|-----------|------------------------------|--------------|-----------|
| AMPHETAMINE                      | 1100      | 3,935                        | 545,546.62   | 138.64    |
| METHAMPHETAMINE                  | 1105      | 28                           | 171.97       | 6.14      |
| LISDEXAMFETAMINE                 | 1205      | 1,926                        | 135,273.65   | 70.24     |
| METHYLPHENIDATE (DL;D;L;ISOMERS) | 1724      | 5,391                        | 580,711.91   | 107.72    |
| CODEINE                          | 9050      | 7,135                        | 462,472.47   | 64.82     |
| BUPRENORPHINE                    | 9064      | 5,025                        | 115,509.99   | 22.99     |
| OXYCODONE                        | 9143      | 8,852                        | 1,973,845.19 | 222.98    |
| HYDROMORPHONE                    | 9150      | 8,619                        | 192,427.89   | 22.33     |
| HYDROCODONE                      | 9193      | 9,319                        | 1,155,101.35 | 123.95    |
| MEPERIDINE (PETHIDINE)           | 9230      | 6,500                        | 188,909.17   | 29.06     |
| METHADONE                        | 9250B     | 5,743                        | 236,381.71   | 41.16     |
| MORPHINE                         | 9300      | 9,697                        | 1,274,221.30 | 131.40    |
| OXYMORPHONE                      | 9652      | 579                          | 4,458.29     | 7.70      |
| TAPENTADOL                       | 9780      | 1,341                        | 80,869.38    | 60.31     |
| FENTANYL BASE                    | 9801      | 10,138                       | 29,916.36    | 2.95      |

**BUSINESS ACTIVITY: C - PRACTITIONERS**

| DRUG NAME        | DRUG CODE | NUMBER OF REGISTRANT SOLD TO | TOTAL GRAMS | AVG GRAMS |
|------------------|-----------|------------------------------|-------------|-----------|
| AMPHETAMINE      | 1100      | 110                          | 2,438.09    | 22.16     |
| METHAMPHETAMINE  | 1105      | 2                            | 8.03        | 4.02      |
| LISDEXAMFETAMINE | 1205      | 51                           | 1,526.09    | 29.92     |

|                                  |       |        |            |       |
|----------------------------------|-------|--------|------------|-------|
| METHYLPHENIDATE (DL;D;L;ISOMERS) | 1724  | 41     | 2,753.88   | 67.17 |
| CODEINE                          | 9050  | 3,959  | 111,012.92 | 28.04 |
| BUPRENORPHINE                    | 9064  | 26,879 | 7,503.76   | 0.28  |
| OXYCODONE                        | 9143  | 1,831  | 14,642.65  | 8.00  |
| HYDROMORPHONE                    | 9150  | 11,182 | 8,352.43   | 0.75  |
| HYDROCODONE                      | 9193  | 11,737 | 48,086.88  | 4.10  |
| MEPERIDINE (PETHIDINE)           | 9230  | 4,051  | 40,129.14  | 9.91  |
| METHADONE                        | 9250B | 700    | 1,784.46   | 2.55  |
| MORPHINE                         | 9300  | 8,086  | 13,223.36  | 1.64  |
| OXYMORPHONE                      | 9652  | 18     | 179.19     | 9.95  |
| TAPENTADOL                       | 9780  | 12     | 547.00     | 45.58 |
| FENTANYL BASE                    | 9801  | 18,521 | 2,056.49   | 0.11  |

**BUSINESS ACTIVITY: D - TEACHING INSTITUTIONS**

| DRUG NAME              | DRUG CODE | NUMBER OF REGISTRANT SOLD TO | TOTAL GRAMS | AVG GRAMS |
|------------------------|-----------|------------------------------|-------------|-----------|
| AMPHETAMINE            | 1100      | 1                            | 0.73        | 0.73      |
| CODEINE                | 9050      | 5                            | 2,144.83    | 428.97    |
| BUPRENORPHINE          | 9064      | 57                           | 7.90        | 0.14      |
| OXYCODONE              | 9143      | 1                            | 0.45        | 0.45      |
| HYDROMORPHONE          | 9150      | 20                           | 30.45       | 1.52      |
| HYDROCODONE            | 9193      | 10                           | 116.31      | 11.63     |
| MEPERIDINE (PETHIDINE) | 9230      | 3                            | 7.63        | 2.54      |
| METHADONE              | 9250B     | 7                            | 135.86      | 19.41     |
| MORPHINE               | 9300      | 14                           | 212.50      | 15.18     |
| FENTANYL BASE          | 9801      | 23                           | 13.17       | 0.57      |

**BUSINESS ACTIVITY: M - MID-LEVEL PRACTITIONERS**

| DRUG NAME                        | DRUG CODE | NUMBER OF REGISTRANT SOLD TO | TOTAL GRAMS | AVG GRAMS |
|----------------------------------|-----------|------------------------------|-------------|-----------|
| AMPHETAMINE                      | 1100      | 3                            | 7.54        | 2.51      |
| METHYLPHENIDATE (DL;D;L;ISOMERS) | 1724      | 1                            | 0.86        | 0.86      |
| CODEINE                          | 9050      | 370                          | 2,233.71    | 6.04      |
| BUPRENORPHINE                    | 9064      | 62                           | 135.53      | 2.19      |
| OXYCODONE                        | 9143      | 11                           | 142.99      | 13.00     |
| HYDROMORPHONE                    | 9150      | 88                           | 11.99       | 0.14      |
| HYDROCODONE                      | 9193      | 27                           | 84.79       | 3.14      |
| MEPERIDINE (PETHIDINE)           | 9230      | 23                           | 112.21      | 4.88      |
| METHADONE                        | 9250B     | 3                            | 46.96       | 15.65     |
| MORPHINE                         | 9300      | 820                          | 457.84      | 0.56      |
| TAPENTADOL                       | 9780      | 1                            | 10.00       | 10.00     |
| FENTANYL BASE                    | 9801      | 1,335                        | 49.39       | 0.04      |

**BUSINESS ACTIVITY: NTP - NARCOTIC TREATMENT PROGRAMS**

| DRUG NAME     | DRUG CODE | NUMBER OF REGISTRANT SOLD TO | TOTAL GRAMS   | AVG GRAMS |
|---------------|-----------|------------------------------|---------------|-----------|
| BUPRENORPHINE | 9064      | 831                          | 81,130.54     | 97.63     |
| METHADONE     | 9250B     | 1,583                        | 11,368,111.28 | 7,181.37  |

Apr 22, 2020

1:26:28 PM
